# Supplementary material
Source: MDPI journal article supplement (https://www.mdpi.com/2304-6740/6/1/5)
Supplement: s1 [file s1]

## Supplementary material

# Pentacoordinated chloro-Iron(III) Complexes with Unsymmetrically-substituted N<sub>2</sub>O<sub>2</sub> quadridentate Schiff-Base Ligands: Syntheses, structures, magnetic and redox properties

Jonathan Cisterna, Vania Artigas, Mauricio Fuentealba, Paul Hamon, Carolina Manzur, Jean-René Hamon, and David Carrillo

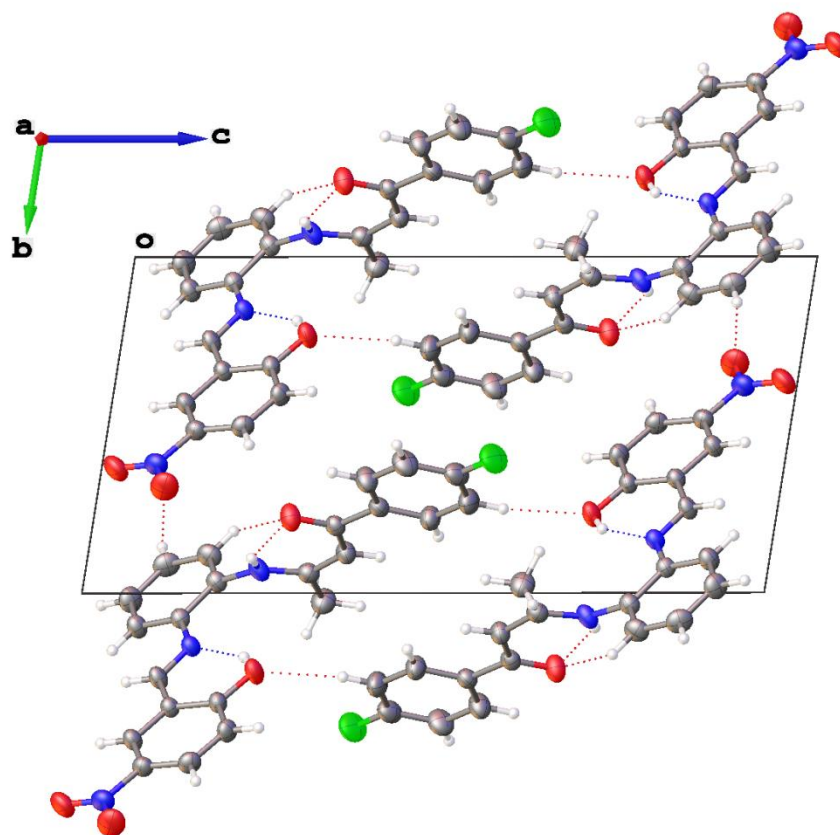

**Figure S1.** Packing diagram of **2** showing the hydrogen bonding interactions.

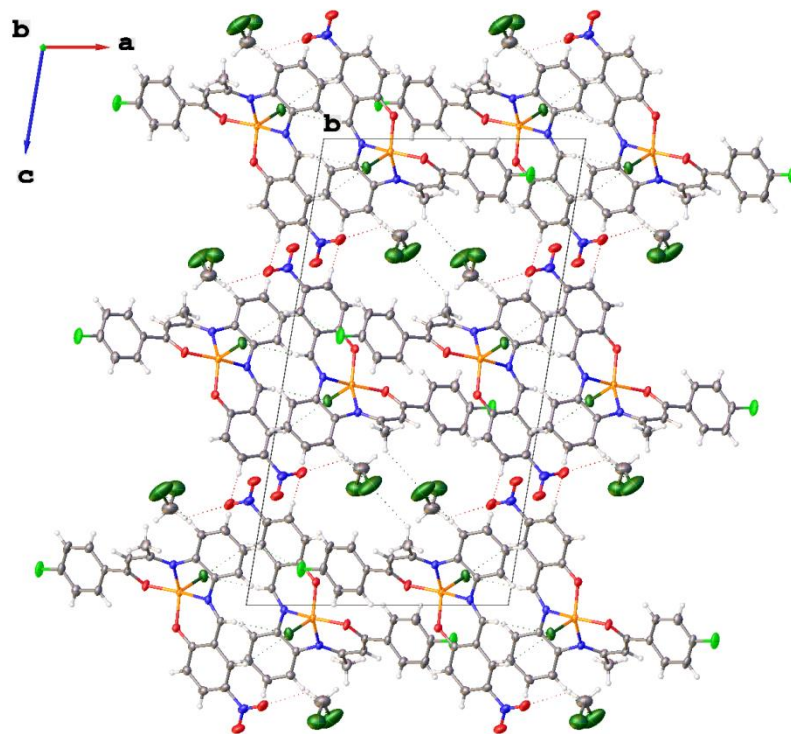

**Figure S2.** Packing diagram of 3·CH<sub>2</sub>Cl<sub>2</sub> showing the hydrogen bonding interactions implying the dichloromethane crystallization molecules.

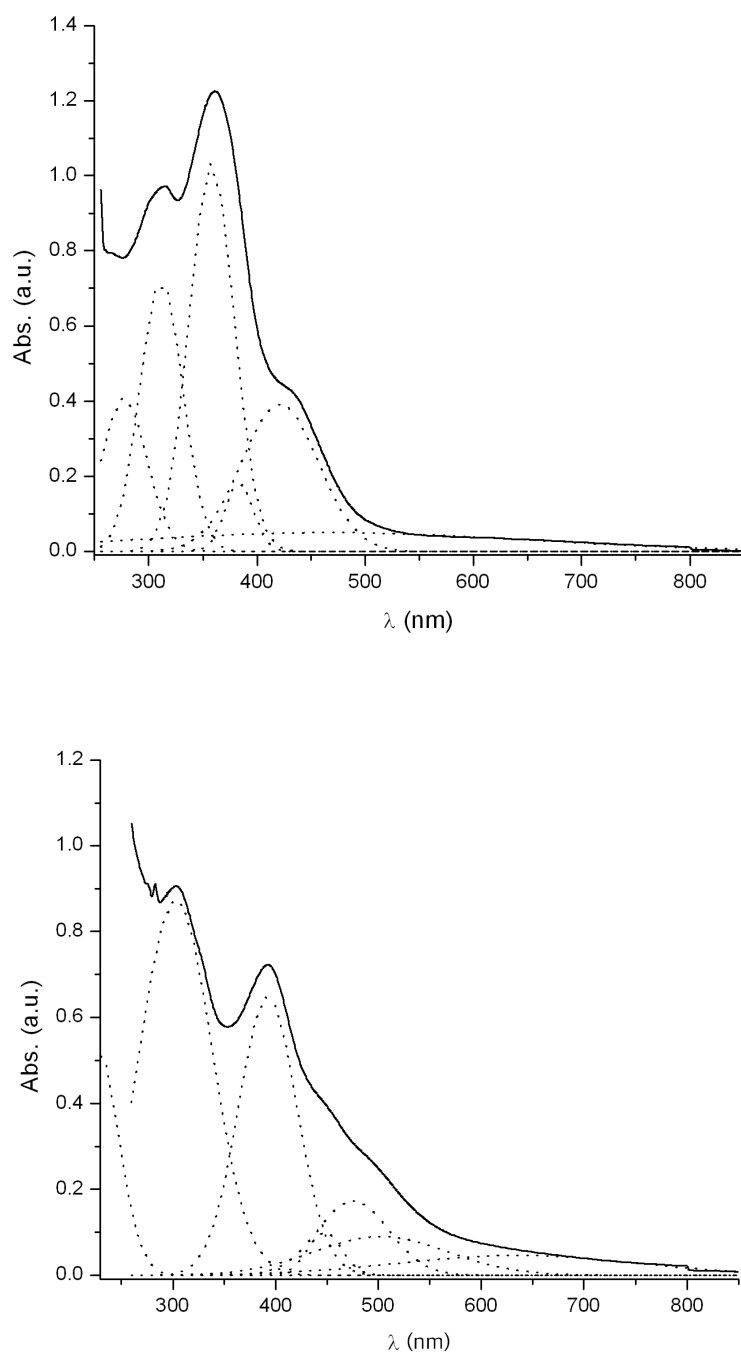

**Figure S3.** Experimental UV-vis spectra of complexes 3 (top, full line) and 5 (bottom, full line) recorded in DMSO at 20 °C, and their respective deconvoluted spectra (dotted lines).

**Table S1.** Selected bond distances (Å) and angles (°) for compounds **3**·CH<sub>2</sub>Cl<sub>2</sub>.

| Bond distances    |          |
|-------------------|----------|
| O(1)-C(7)         | 1.292(5) |
| O(2)-C(19)        | 1.303(5) |
| N(1)-C(9)         | 1.323(5) |
| N(1)-C(11)        | 1.419(5) |
| N(2)-C(16)        | 1.408(5) |
| N(2)-C(17)        | 1.301(5) |
| C(7)-C(8)         | 1.376(6) |
| C(8)-C(9)         | 1.398(6) |
| C(11)-C(16)       | 1.404(5) |
| C(17)-C(18)       | 1.422(6) |
| C(18)-C(19)       | 1.434(5) |
| F(1)-C(1)         | 1.356(5) |
| N(3)-C(22)        | 1.461(6) |
| N(3)-O(3)         | 1.222(6) |
| N(3)-O(4)         | 1.221(6) |
| Bond angles       |          |
| Fe(1)-O(1)-C(7)   | 131.4(3) |
| Fe(1)-O(2)-C(19)  | 132.2(3) |
| Fe(1)-N(1)-C(9)   | 124.4(3) |
| Fe(1)-N(1)-C(11)  | 111.4(2) |
| Fe(1)-N(2)-C(16)  | 111.2(2) |
| Fe(1)-N(2)-C(17)  | 125.6(3) |
| O(1)-C(7)-C(8)    | 123.3(4) |
| C(7)-C(8)-C(9)    | 126.1(4) |
| C(8)-C(9)-N(1)    | 122.8(4) |
| O(2)-C(19)-C(18)  | 122.2(4) |
| N(2)-C(17)-C(18)  | 124.4(3) |
| C(17)-C(18)-C(19) | 123.7(3) |

**Table S2.** Selected bond distances (Å) and angles (°) for compound **5**-0.5MeCN.

| Bond distances    |           |                   |           |
|-------------------|-----------|-------------------|-----------|
| O(1)-C(11)        | 1.311(11) | O(2)-C(23)        | 1.353(11) |
| N(1)-C(13)        | 1.321(12) | N(1)-C(15)        | 1.417(12) |
| N(2)-C(20)        | 1.414(11) | N(2)-C(21)        | 1.305(11) |
| O(3)-C(27)        | 1.388(13) | O(3)-C(28)        | 1.427(18) |
| C(10)-C(11)       | 1.482(12) | C(11)-C(12)       | 1.361(14) |
| C(12)-C(13)       | 1.361(14) | C(15)-C(20)       | 1.403(13) |
| C(21)-C(22)       | 1.428(12) | C(22)-C(23)       | 1.395(13) |
| Fe(2)-C(Cp) avg   | 2.05(2)   | Fe(2)-C(Cp') avg  | 2.026(13) |
| Bond angles       |           |                   |           |
| Fe(1)-O(1)-C(11)  | 128.0(6)  | Fe(1)-O(2)-C(23)  | 129.2(6)  |
| Fe(1)-N(1)-C(13)  | 125.0(6)  | Fe(1)-N(1)-C(15)  | 111.2(6)  |
| Fe(1)-N(2)-C(20)  | 112.1(6)  | Fe(1)-N(2)-C(21)  | 126.9(6)  |
| O(1)-C(11)-C(12)  | 122.6(9)  | O(2)-C(23)-C(22)  | 124.2(8)  |
| N(1)-C(13)-C(12)  | 120.5(8)  | N(2)-C(21)-C(22)  | 122.8(8)  |
| C(11)-C(12)-C(13) | 128.2(9)  | C(21)-C(22)-C(23) | 123.2(8)  |

Abbreviations: Cp = C<sub>5</sub>H<sub>5</sub>, Cp' = C<sub>5</sub>H<sub>4</sub>**Table S3.** Atomic occupancy for complex **5**.

| Atom   | Occupancy | Atom   | Occupancy | Atom   | Occupancy |
|--------|-----------|--------|-----------|--------|-----------|
| C(2)   | 0.67(2)   | H(2)   | 0.67(2)   | C(1)   | 0.67(2)   |
| H(1)   | 0.67(2)   | C(5)   | 0.67(2)   | H(5)   | 0.67(2)   |
| C(4)   | 0.67(2)   | H(4)   | 0.67(2)   | C(3)   | 0.67(2)   |
| H(3)   | 0.67(2)   | N(1S)  | 0.5       | C(1S)  | 0.5       |
| C(2S)  | 0.5       | H(4A)  | 0.5       | H(4B)  | 0.5       |
| H(4C)  | 0.5       | C(1A)  | 0.33(2)   | H(4AB) | 0.33(2)   |
| C(2A)  | 0.33(2)   | H(0AB) | 0.33(2)   | C(3A)  | 0.33(2)   |
| H(1AB) | 0.33(2)   | C(4A)  | 0.33(2)   | H(2AB) | 0.33(2)   |
| C(5A)  | 0.33(2)   | H(3AB) | 0.33(2)   |        |           |

**Table S4.** Hydrogen bond interaction parameters for proligand **2**.

| D-H...A          | D-H (Å) | H...A (Å) | D...A (Å) | D-H...A (°) |
|------------------|---------|-----------|-----------|-------------|
| O(2)-H(2)...N(2) | 0.82    | 1.85      | 2.586(2)  | 148.4       |
| N(1)-H(1)...O(1) | 0.86    | 1.98      | 2.638(2)  | 132.6       |
