# Supplementary material
Source: MDPI journal article supplement (https://www.mdpi.com/2304-6740/6/1/5)
Supplement: s1 [file s1]

Archive with 16 entries (16 files):
- Supplementary material.pdf
- CIF&CHECKCIF/checkcif_Complex-3.pdf
- CIF&CHECKCIF/checkcif_Complex-5.pdf
- CIF&CHECKCIF/checkcif_Ligand-2.pdf
- CIF&CHECKCIF/CIF&CHECKCIF.zip
- CIF&CHECKCIF/Complex-3.cif
- CIF&CHECKCIF/Complex-5.cif
- CIF&CHECKCIF/Ligand-2.cif
- Figures-Schemes/Figure 1.tif
- Figures-Schemes/Figure 2.tif
- Figures-Schemes/Figure 3.tif
- Figures-Schemes/Figure 4.tif
- Figures-Schemes/Figure5.tif
- Figures-Schemes/scheme 1 .tif
- Figures-Schemes/scheme 2.tif
- Figures-Schemes/Scheme 3.tif
