# Supplementary material
Source: MDPI journal article supplement (https://www.mdpi.com/2304-6740/6/1/5)
Supplement: s1 [file s1 › CIF&CHECKCIF/Complex-3.cif]

data_test-4
_audit_creation_date              2016-10-26
_audit_creation_method
;
Olex2 1.2
(compiled 2016.09.09 svn.r3337 for OlexSys, GUI svn.r5227)
;
_publ_contact_author_address      ?
_publ_contact_author_email        ?
_publ_contact_author_id_orcid     ?
_publ_contact_author_name         ''
_publ_contact_author_phone        ?
_publ_section_references
;
Dolomanov, O.V., Bourhis, L.J., Gildea, R.J, Howard, J.A.K. & Puschmann, H.
 (2009), J. Appl. Cryst. 42, 339-341.

Sheldrick, G.M. (2008). Acta Cryst. A64, 112-122.
;
_chemical_name_common             ?
_chemical_name_systematic         ?
_chemical_formula_moiety          'C23 H16 Cl F Fe N3 O4, C H2 Cl2'
_chemical_formula_sum             'C24 H18 Cl3 F Fe N3 O4'
_chemical_formula_weight          593.61
_chemical_melting_point           ?
loop_
  _atom_type_symbol
  _atom_type_description
  _atom_type_scat_dispersion_real
  _atom_type_scat_dispersion_imag
  _atom_type_scat_source
 'C' 'C' 0.0033 0.0016 'International Tables Vol C Tables 4.2.6.8 and 6.1.1.4'
 'H' 'H' 0.0000 0.0000 'International Tables Vol C Tables 4.2.6.8 and 6.1.1.4'
 'Cl' 'Cl' 0.1484 0.1585 'International Tables Vol C Tables 4.2.6.8 and 6.1.1.4'
 'F' 'F' 0.0171 0.0103 'International Tables Vol C Tables 4.2.6.8 and 6.1.1.4'
 'Fe' 'Fe' 0.3463 0.8444 'International Tables Vol C Tables 4.2.6.8 and 6.1.1.4'
 'N' 'N' 0.0061 0.0033 'International Tables Vol C Tables 4.2.6.8 and 6.1.1.4'
 'O' 'O' 0.0106 0.0060 'International Tables Vol C Tables 4.2.6.8 and 6.1.1.4'

_shelx_space_group_comment
;
The symmetry employed for this shelxl refinement is uniquely defined
by the following loop, which should always be used as a source of
symmetry information in preference to the above space-group names.
They are only intended as comments.
;
_space_group_crystal_system       'monoclinic'
_space_group_IT_number            14
_space_group_name_H-M_alt         'P 1 21/c 1'
_space_group_name_Hall            '-P 2ybc'
loop_
  _space_group_symop_operation_xyz
 'x, y, z'
 '-x, y+1/2, -z+1/2'
 '-x, -y, -z'
 'x, -y-1/2, z-1/2'

_cell_length_a                    13.7047(8)
_cell_length_b                    7.3909(5)
_cell_length_c                    24.6860(14)
_cell_angle_alpha                 90
_cell_angle_beta                  99.469(2)
_cell_angle_gamma                 90
_cell_volume                      2466.4(3)
_cell_formula_units_Z             4
_cell_measurement_reflns_used     9565
_cell_measurement_temperature     296
_cell_measurement_theta_max       26.28
_cell_measurement_theta_min       2.43
_shelx_estimated_absorpt_T_max    0.936
_shelx_estimated_absorpt_T_min    0.770
_exptl_absorpt_coefficient_mu     0.981
_exptl_absorpt_correction_T_max   0.9808
_exptl_absorpt_correction_T_min   0.7652
_exptl_absorpt_correction_type    numerical
_exptl_absorpt_process_details
;
SADABS-2014/5 (Bruker,2014/5) was used for absorption correction.
wR2(int) was 0.1029 before and 0.0590 after correction.
The Ratio of minimum to maximum transmission is 0.7802.
The \l/2 correction factor is 0.00150.
;
_exptl_absorpt_special_details    ?
_exptl_crystal_colour             'clear light brown'
_exptl_crystal_colour_lustre      clear
_exptl_crystal_colour_modifier    light
_exptl_crystal_colour_primary     brown
_exptl_crystal_density_diffrn     1.599
_exptl_crystal_density_meas       ?
_exptl_crystal_density_method     ?
_exptl_crystal_description        plate
_exptl_crystal_F_000              1204
_exptl_crystal_size_max           0.281
_exptl_crystal_size_mid           0.129
_exptl_crystal_size_min           0.068
_exptl_transmission_factor_max    ?
_exptl_transmission_factor_min    ?
_diffrn_reflns_av_R_equivalents   0.0757
_diffrn_reflns_av_unetI/netI      0.0360
_diffrn_reflns_Laue_measured_fraction_full 0.999
_diffrn_reflns_Laue_measured_fraction_max 0.999
_diffrn_reflns_limit_h_max        17
_diffrn_reflns_limit_h_min        -17
_diffrn_reflns_limit_k_max        9
_diffrn_reflns_limit_k_min        -9
_diffrn_reflns_limit_l_max        30
_diffrn_reflns_limit_l_min        -30
_diffrn_reflns_number             44081
_diffrn_reflns_point_group_measured_fraction_full 0.999
_diffrn_reflns_point_group_measured_fraction_max 0.999
_diffrn_reflns_theta_full         25.242
_diffrn_reflns_theta_max          26.380
_diffrn_reflns_theta_min          2.429
_diffrn_ambient_temperature       296
_diffrn_detector_area_resol_mean  ?
_diffrn_measured_fraction_theta_full 0.999
_diffrn_measured_fraction_theta_max 0.999
_diffrn_measurement_device_type   'Bruker APEX-II CCD'
_diffrn_measurement_method        '\f and \w scans'
_diffrn_radiation_type            MoK\a
_diffrn_radiation_wavelength      0.71073
_diffrn_source                    ?
_diffrn_standards_number          0
_reflns_Friedel_coverage          0.000
_reflns_Friedel_fraction_full     .
_reflns_Friedel_fraction_max      .
_reflns_number_gt                 3732
_reflns_number_total              5041
_reflns_special_details
;
 Reflections were merged by SHELXL according to the crystal
 class for the calculation of statistics and refinement.
 
 _reflns_Friedel_fraction is defined as the number of unique
 Friedel pairs measured divided by the number that would be
 possible theoretically, ignoring centric projections and
 systematic absences.
;
_reflns_threshold_expression      'I > 2\s(I)'
_computing_cell_refinement        'SAINT v8.34A (Bruker, 2013)'
_computing_data_collection        ?
_computing_data_reduction         'SAINT v8.34A (Bruker, 2013)'
_computing_molecular_graphics     'Olex2 (Dolomanov et al., 2009)'
_computing_publication_material   'Olex2 (Dolomanov et al., 2009)'
_computing_structure_refinement   'XL (Sheldrick, 2008)'
_computing_structure_solution     'XS (Sheldrick, 2008)'
_refine_diff_density_max          0.556
_refine_diff_density_min          -0.781
_refine_diff_density_rms          0.086
_refine_ls_extinction_coef        .
_refine_ls_extinction_method      none
_refine_ls_goodness_of_fit_ref    1.083
_refine_ls_hydrogen_treatment     constr
_refine_ls_matrix_type            full
_refine_ls_number_parameters      326
_refine_ls_number_reflns          5041
_refine_ls_number_restraints      12
_refine_ls_R_factor_all           0.0852
_refine_ls_R_factor_gt            0.0584
_refine_ls_restrained_S_all       1.082
_refine_ls_shift/su_max           0.001
_refine_ls_shift/su_mean          0.000
_refine_ls_structure_factor_coef  Fsqd
_refine_ls_weighting_details
'w=1/[\s^2^(Fo^2^)+(0.0830P)^2^+2.9610P] where P=(Fo^2^+2Fc^2^)/3'
_refine_ls_weighting_scheme       calc
_refine_ls_wR_factor_gt           0.1487
_refine_ls_wR_factor_ref          0.1653
_refine_special_details           ?
_olex2_refinement_description
;
1. Fixed Uiso
 At 1.2 times of:
  All C(H) groups, All C(H,H) groups
 At 1.5 times of:
  All C(H,H,H) groups
2. Uiso/Uaniso restraints and constraints
Uanis(Cl3) \\sim Ueq, Uanis(Cl2) \\sim Ueq: with sigma of 0.1 and sigma for
terminal atoms of 0.2
3.a Secondary CH2 refined with riding coordinates:
 C24(H24A,H24B)
3.b Aromatic/amide H refined with riding coordinates:
 C2(H2), C3(H3), C5(H5), C6(H6), C8(H8), C12(H12), C13(H13), C14(H14),
 C15(H15), C17(H17), C20(H20), C21(H21), C23(H23)
3.c Idealised Me refined as rotating group:
 C10(H10A,H10B,H10C)
;
_atom_sites_solution_hydrogens    geom
_atom_sites_solution_primary      heavy
_atom_sites_solution_secondary    ?
loop_
  _atom_site_label
  _atom_site_type_symbol
  _atom_site_fract_x
  _atom_site_fract_y
  _atom_site_fract_z
  _atom_site_U_iso_or_equiv
  _atom_site_adp_type
  _atom_site_occupancy
  _atom_site_site_symmetry_order
  _atom_site_calc_flag
  _atom_site_refinement_flags_posn
  _atom_site_refinement_flags_adp
  _atom_site_refinement_flags_occupancy
  _atom_site_disorder_assembly
  _atom_site_disorder_group
 Fe1 Fe 0.73750(4) 0.05569(7) 0.47189(2) 0.03229(18) Uani 1 1 d . . . . .
 Cl1 Cl 0.81888(8) 0.27461(15) 0.43784(6) 0.0556(3) Uani 1 1 d . . . . .
 F1 F 0.1880(2) 0.5087(4) 0.42315(16) 0.0771(10) Uani 1 1 d . . . . .
 O1 O 0.60427(19) 0.1449(4) 0.45783(13) 0.0472(7) Uani 1 1 d . . . . .
 O2 O 0.74778(19) 0.0833(4) 0.54916(12) 0.0415(7) Uani 1 1 d . . . . .
 O3 O 1.1275(3) -0.0907(6) 0.71601(15) 0.0783(12) Uani 1 1 d . . . . .
 O4 O 1.0484(3) 0.0769(7) 0.76575(15) 0.0850(13) Uani 1 1 d . . . . .
 N1 N 0.6959(2) -0.1410(4) 0.41340(13) 0.0351(7) Uani 1 1 d . . . . .
 N2 N 0.8518(2) -0.1372(4) 0.48893(13) 0.0330(7) Uani 1 1 d . . . . .
 N3 N 1.0554(3) -0.0021(6) 0.72311(16) 0.0584(11) Uani 1 1 d . . . . .
 C1 C 0.2720(3) 0.4122(6) 0.4226(2) 0.0511(12) Uani 1 1 d . . . . .
 C2 C 0.2816(3) 0.3166(7) 0.3769(2) 0.0577(13) Uani 1 1 d . . . . .
 H2 H 0.2334 0.3228 0.3457 0.069 Uiso 1 1 calc R . . . .
 C3 C 0.3648(3) 0.2091(6) 0.37771(19) 0.0475(10) Uani 1 1 d . . . . .
 H3 H 0.3721 0.1413 0.3469 0.057 Uiso 1 1 calc R . . . .
 C4 C 0.4373(3) 0.2021(5) 0.42425(17) 0.0380(9) Uani 1 1 d . . . . .
 C5 C 0.4265(3) 0.3086(6) 0.46874(18) 0.0447(10) Uani 1 1 d . . . . .
 H5 H 0.4763 0.3099 0.4993 0.054 Uiso 1 1 calc R . . . .
 C6 C 0.3426(3) 0.4141(6) 0.4688(2) 0.0538(11) Uani 1 1 d . . . . .
 H6 H 0.3347 0.4836 0.4991 0.065 Uiso 1 1 calc R . . . .
 C7 C 0.5258(3) 0.0831(6) 0.42728(16) 0.0376(9) Uani 1 1 d . . . . .
 C8 C 0.5223(3) -0.0814(6) 0.40097(18) 0.0426(10) Uani 1 1 d . . . . .
 H8 H 0.4602 -0.1236 0.3851 0.051 Uiso 1 1 calc R . . . .
 C9 C 0.6034(3) -0.1912(6) 0.39592(16) 0.0390(9) Uani 1 1 d . . . . .
 C10 C 0.5782(3) -0.3773(7) 0.3716(2) 0.0568(12) Uani 1 1 d . . . . .
 H10A H 0.6319 -0.4589 0.3837 0.085 Uiso 1 1 calc GR . . . .
 H10B H 0.5674 -0.3696 0.3323 0.085 Uiso 1 1 calc GR . . . .
 H10C H 0.5193 -0.4211 0.3836 0.085 Uiso 1 1 calc GR . . . .
 C11 C 0.7792(3) -0.2353(5) 0.40033(16) 0.0355(8) Uani 1 1 d . . . . .
 C12 C 0.7860(3) -0.3099(6) 0.34952(17) 0.0433(9) Uani 1 1 d . . . . .
 H12 H 0.7318 -0.3057 0.3214 0.052 Uiso 1 1 calc R . . . .
 C13 C 0.8728(3) -0.3904(6) 0.34030(19) 0.0488(10) Uani 1 1 d . . . . .
 H13 H 0.8765 -0.4413 0.3062 0.059 Uiso 1 1 calc R . . . .
 C14 C 0.9548(3) -0.3955(6) 0.38189(19) 0.0452(10) Uani 1 1 d . . . . .
 H14 H 1.0124 -0.4527 0.3758 0.054 Uiso 1 1 calc R . . . .
 C15 C 0.9511(3) -0.3169(5) 0.43168(17) 0.0384(9) Uani 1 1 d . . . . .
 H15 H 1.0066 -0.3178 0.4590 0.046 Uiso 1 1 calc R . . . .
 C16 C 0.8632(3) -0.2349(5) 0.44140(16) 0.0334(8) Uani 1 1 d . . . . .
 C17 C 0.9124(3) -0.1531(5) 0.53515(16) 0.0341(8) Uani 1 1 d . . . . .
 H17 H 0.9652 -0.2327 0.5364 0.041 Uiso 1 1 calc R . . . .
 C18 C 0.9032(3) -0.0569(5) 0.58393(16) 0.0352(8) Uani 1 1 d . . . . .
 C19 C 0.8205(3) 0.0564(5) 0.58949(16) 0.0364(8) Uani 1 1 d . . . . .
 C20 C 0.8158(3) 0.1364(6) 0.64047(17) 0.0450(10) Uani 1 1 d . . . . .
 H20 H 0.7609 0.2054 0.6448 0.054 Uiso 1 1 calc R . . . .
 C21 C 0.9790(3) -0.0770(6) 0.62954(17) 0.0411(9) Uani 1 1 d . . . . .
 H21 H 1.0335 -0.1492 0.6268 0.049 Uiso 1 1 calc R . . . .
 C22 C 0.9726(3) 0.0095(6) 0.67765(17) 0.0447(10) Uani 1 1 d . . . . .
 C23 C 0.8911(3) 0.1146(6) 0.68400(17) 0.0459(10) Uani 1 1 d . . . . .
 H23 H 0.8876 0.1697 0.7175 0.055 Uiso 1 1 calc R . . . .
 Cl2 Cl 0.6571(2) 0.3551(4) 0.24940(11) 0.1501(10) Uani 1 1 d . U . . .
 Cl3 Cl 0.6029(3) -0.0193(5) 0.25612(16) 0.217(2) Uani 1 1 d . U . . .
 C24 C 0.6470(7) 0.1668(15) 0.2927(3) 0.131(3) Uani 1 1 d . . . . .
 H24A H 0.7116 0.1396 0.3137 0.157 Uiso 1 1 calc R . . . .
 H24B H 0.6031 0.1972 0.3184 0.157 Uiso 1 1 calc R . . . .

loop_
  _atom_site_aniso_label
  _atom_site_aniso_U_11
  _atom_site_aniso_U_22
  _atom_site_aniso_U_33
  _atom_site_aniso_U_23
  _atom_site_aniso_U_13
  _atom_site_aniso_U_12
 Fe1 0.0233(3) 0.0316(3) 0.0406(3) -0.0006(2) 0.0013(2) 0.0013(2)
 Cl1 0.0448(6) 0.0426(6) 0.0823(8) 0.0159(5) 0.0188(6) -0.0009(5)
 F1 0.0376(14) 0.0577(17) 0.133(3) 0.0132(18) 0.0058(16) 0.0195(13)
 O1 0.0260(13) 0.0508(17) 0.0614(18) -0.0140(15) -0.0030(13) 0.0064(12)
 O2 0.0325(14) 0.0486(17) 0.0425(15) -0.0026(13) 0.0033(12) 0.0097(12)
 O3 0.053(2) 0.116(3) 0.060(2) 0.022(2) -0.0094(18) 0.009(2)
 O4 0.082(3) 0.121(4) 0.045(2) -0.006(2) -0.0094(19) -0.004(3)
 N1 0.0306(16) 0.0341(17) 0.0390(17) -0.0014(14) 0.0008(13) 0.0027(13)
 N2 0.0270(15) 0.0297(16) 0.0425(18) 0.0017(14) 0.0059(14) 0.0003(12)
 N3 0.055(2) 0.075(3) 0.042(2) 0.014(2) -0.0033(19) -0.007(2)
 C1 0.029(2) 0.041(2) 0.082(3) 0.014(2) 0.005(2) 0.0057(17)
 C2 0.032(2) 0.061(3) 0.074(3) 0.021(3) -0.010(2) 0.004(2)
 C3 0.040(2) 0.051(3) 0.049(2) 0.004(2) -0.0019(19) 0.0001(19)
 C4 0.0246(17) 0.041(2) 0.048(2) 0.0064(18) 0.0048(16) -0.0013(16)
 C5 0.0298(19) 0.051(2) 0.051(2) 0.005(2) 0.0015(18) 0.0077(18)
 C6 0.045(2) 0.049(3) 0.067(3) 0.002(2) 0.010(2) 0.008(2)
 C7 0.0256(18) 0.047(2) 0.040(2) 0.0040(17) 0.0042(16) -0.0014(16)
 C8 0.0255(18) 0.047(2) 0.051(2) -0.0029(19) -0.0053(17) -0.0041(17)
 C9 0.034(2) 0.041(2) 0.040(2) -0.0031(17) 0.0002(17) -0.0030(17)
 C10 0.048(3) 0.051(3) 0.069(3) -0.018(2) 0.001(2) -0.010(2)
 C11 0.0324(19) 0.0324(19) 0.041(2) 0.0035(16) 0.0051(16) 0.0019(15)
 C12 0.045(2) 0.044(2) 0.040(2) -0.0027(18) 0.0059(18) 0.0046(19)
 C13 0.054(3) 0.047(2) 0.049(2) -0.005(2) 0.019(2) 0.003(2)
 C14 0.040(2) 0.039(2) 0.062(3) 0.0043(19) 0.022(2) 0.0054(18)
 C15 0.0334(19) 0.032(2) 0.050(2) 0.0036(17) 0.0078(17) -0.0003(16)
 C16 0.0316(18) 0.0279(18) 0.042(2) 0.0009(15) 0.0087(16) 0.0006(15)
 C17 0.0262(17) 0.0320(19) 0.044(2) 0.0052(16) 0.0057(16) 0.0003(15)
 C18 0.0281(18) 0.036(2) 0.041(2) 0.0072(17) 0.0044(15) -0.0030(16)
 C19 0.0322(18) 0.034(2) 0.043(2) 0.0030(17) 0.0058(16) -0.0064(16)
 C20 0.040(2) 0.049(2) 0.046(2) 0.000(2) 0.0087(19) -0.0016(19)
 C21 0.035(2) 0.044(2) 0.043(2) 0.0116(18) 0.0018(17) -0.0005(17)
 C22 0.045(2) 0.050(2) 0.037(2) 0.0115(18) 0.0004(18) -0.0077(19)
 C23 0.052(2) 0.049(2) 0.037(2) 0.0013(18) 0.0067(19) -0.010(2)
 Cl2 0.177(3) 0.154(2) 0.1193(19) -0.0040(17) 0.0241(18) 0.005(2)
 Cl3 0.233(4) 0.179(3) 0.193(3) 0.062(3) -0.105(3) -0.045(3)
 C24 0.132(7) 0.182(10) 0.075(5) 0.013(6) 0.006(5) -0.004(7)

_geom_special_details
;
 All esds (except the esd in the dihedral angle between two l.s. planes)
 are estimated using the full covariance matrix.  The cell esds are taken
 into account individually in the estimation of esds in distances, angles
 and torsion angles; correlations between esds in cell parameters are only
 used when they are defined by crystal symmetry.  An approximate (isotropic)
 treatment of cell esds is used for estimating esds involving l.s. planes.
;
loop_
  _geom_bond_atom_site_label_1
  _geom_bond_atom_site_label_2
  _geom_bond_distance
  _geom_bond_site_symmetry_2
  _geom_bond_publ_flag
 Fe1 Cl1 2.2084(12) . ?
 Fe1 O1 1.918(3) . ?
 Fe1 O2 1.900(3) . ?
 Fe1 N1 2.062(3) . ?
 Fe1 N2 2.109(3) . ?
 F1 C1 1.356(5) . ?
 O1 C7 1.292(5) . ?
 O2 C19 1.303(5) . ?
 O3 N3 1.222(6) . ?
 O4 N3 1.221(6) . ?
 N1 C9 1.323(5) . ?
 N1 C11 1.419(5) . ?
 N2 C16 1.408(5) . ?
 N2 C17 1.301(5) . ?
 N3 C22 1.461(6) . ?
 C1 C2 1.355(7) . ?
 C1 C6 1.369(7) . ?
 C2 C3 1.387(6) . ?
 C3 C4 1.391(6) . ?
 C4 C5 1.379(6) . ?
 C4 C7 1.490(5) . ?
 C5 C6 1.389(6) . ?
 C7 C8 1.376(6) . ?
 C8 C9 1.398(6) . ?
 C9 C10 1.518(6) . ?
 C11 C12 1.387(6) . ?
 C11 C16 1.404(5) . ?
 C12 C13 1.382(6) . ?
 C13 C14 1.392(7) . ?
 C14 C15 1.368(6) . ?
 C15 C16 1.403(5) . ?
 C17 C18 1.422(6) . ?
 C18 C19 1.434(5) . ?
 C18 C21 1.409(5) . ?
 C19 C20 1.402(6) . ?
 C20 C23 1.371(6) . ?
 C21 C22 1.364(6) . ?
 C22 C23 1.391(6) . ?
 Cl2 C24 1.774(10) . ?
 Cl3 C24 1.701(11) . ?

loop_
  _geom_angle_atom_site_label_1
  _geom_angle_atom_site_label_2
  _geom_angle_atom_site_label_3
  _geom_angle
  _geom_angle_site_symmetry_1
  _geom_angle_site_symmetry_3
  _geom_angle_publ_flag
 O1 Fe1 Cl1 101.80(10) . . ?
 O1 Fe1 N1 88.31(12) . . ?
 O1 Fe1 N2 157.26(13) . . ?
 O2 Fe1 Cl1 110.17(10) . . ?
 O2 Fe1 O1 93.21(12) . . ?
 O2 Fe1 N1 138.13(13) . . ?
 O2 Fe1 N2 86.69(12) . . ?
 N1 Fe1 Cl1 110.41(10) . . ?
 N1 Fe1 N2 76.92(12) . . ?
 N2 Fe1 Cl1 99.55(9) . . ?
 C7 O1 Fe1 131.4(3) . . ?
 C19 O2 Fe1 132.2(3) . . ?
 C9 N1 Fe1 124.4(3) . . ?
 C9 N1 C11 123.5(3) . . ?
 C11 N1 Fe1 111.4(2) . . ?
 C16 N2 Fe1 111.2(2) . . ?
 C17 N2 Fe1 125.6(3) . . ?
 C17 N2 C16 122.8(3) . . ?
 O3 N3 C22 117.7(4) . . ?
 O4 N3 O3 124.0(4) . . ?
 O4 N3 C22 118.3(5) . . ?
 F1 C1 C6 118.1(5) . . ?
 C2 C1 F1 118.8(4) . . ?
 C2 C1 C6 123.1(4) . . ?
 C1 C2 C3 118.6(4) . . ?
 C2 C3 C4 120.5(4) . . ?
 C3 C4 C7 121.9(4) . . ?
 C5 C4 C3 118.8(4) . . ?
 C5 C4 C7 119.3(4) . . ?
 C4 C5 C6 121.2(4) . . ?
 C1 C6 C5 117.8(5) . . ?
 O1 C7 C4 114.4(4) . . ?
 O1 C7 C8 123.3(4) . . ?
 C8 C7 C4 122.3(3) . . ?
 C7 C8 C9 126.1(4) . . ?
 N1 C9 C8 122.8(4) . . ?
 N1 C9 C10 121.8(4) . . ?
 C8 C9 C10 115.3(4) . . ?
 C12 C11 N1 125.3(4) . . ?
 C12 C11 C16 119.0(3) . . ?
 C16 C11 N1 115.5(3) . . ?
 C13 C12 C11 120.5(4) . . ?
 C12 C13 C14 120.1(4) . . ?
 C15 C14 C13 120.4(4) . . ?
 C14 C15 C16 119.8(4) . . ?
 C11 C16 N2 114.4(3) . . ?
 C15 C16 N2 125.4(4) . . ?
 C15 C16 C11 120.1(4) . . ?
 N2 C17 C18 124.4(3) . . ?
 C17 C18 C19 123.7(3) . . ?
 C21 C18 C17 117.9(4) . . ?
 C21 C18 C19 118.4(4) . . ?
 O2 C19 C18 122.2(4) . . ?
 O2 C19 C20 118.7(4) . . ?
 C20 C19 C18 119.1(4) . . ?
 C23 C20 C19 121.0(4) . . ?
 C22 C21 C18 120.1(4) . . ?
 C21 C22 N3 119.2(4) . . ?
 C21 C22 C23 121.9(4) . . ?
 C23 C22 N3 118.9(4) . . ?
 C20 C23 C22 119.5(4) . . ?
 Cl3 C24 Cl2 111.8(5) . . ?

_shelx_SHELXL_version_number      '2014/7'
loop_
  _refln_index_h
  _refln_index_k
  _refln_index_l
  _refln_F_squared_meas
  _refln_F_squared_sigma
  _refln_scale_group_code
 -2 0 0 2026.46 47.9644 3
 2 0 0 1991.6 47.3776 3
 2 0 0 2085.4 47.7646 3
 -2 0 0 2004.15 47.3994 3
 3 0 0 1.06103 3.55419 3
 -3 0 0 8.54945 4.87717 3
 -3 0 0 3.99301 3.69517 3
 3 0 0 12.1143 4.76151 3
 4 0 0 52.7027 7.03505 3
 -4 0 0 57.1713 6.82481 3
 4 0 0 74.1527 8.88192 3
 -4 0 0 63.3155 8.81078 3
 -5 0 0 551.855 16.7154 3
 5 0 0 534.357 16.7666 3
 5 0 0 566.179 18.1522 3
 -5 0 0 591.281 18.4972 3
 6 0 0 394.506 13.9605 3
 -6 0 0 387.95 15.76 3
 6 0 0 389.1 15.5162 3
 -6 0 0 400.39 13.9452 3
 -7 0 0 217.322 11.2426 3
 7 0 0 208.772 13.0349 3
 -7 0 0 200.937 12.863 3
 7 0 0 202.727 11.0806 3
 -8 0 0 69.5019 8.79665 3
 8 0 0 67.9061 7.27021 3
 -8 0 0 68.6225 9.52982 3
 8 0 0 58.0021 8.33411 3
 9 0 0 854.309 27.3173 3
 -9 0 0 851.33 25.426 3
 9 0 0 812.998 25.3026 3
 -9 0 0 823.635 27.1702 3
 -9 0 0 860.585 25.7996 1
 -10 0 0 150.398 12.6324 3
 -10 0 0 165.864 12.7495 1
 10 0 0 169.954 15.3132 3
 -10 0 0 145.649 14.8423 3
 10 0 0 148.11 12.3256 3
 -11 0 0 244.838 17.9215 3
 -11 0 0 280.953 16.3567 3
 11 0 0 244.464 15.3485 3
 -11 0 0 256.57 15.9518 1
 11 0 0 246.146 18.1439 3
 -12 0 0 46.3004 9.28596 3
 -12 0 0 35.0242 9.44485 1
 -12 0 0 28.0813 10.5512 3
 12 0 0 50.4627 11.3259 3
 12 0 0 43.2654 9.08496 3
 -13 0 0 561.224 23.1432 3
 13 0 0 547.669 23.2025 3
 -13 0 0 527.82 26.3168 3
 -13 0 0 549.272 23.777 1
 13 0 0 578.375 26.9655 3
 -14 0 0 188.67 17.2183 1
 14 0 0 172.479 21.4675 3
 -14 0 0 162.073 21.4549 3
 14 0 0 167.382 17.645 3
 -14 0 0 155.987 16.8552 3
 15 0 0 117.816 16.8182 3
 15 0 0 79.0489 13.122 3
 -15 0 0 150.15 19.0793 1
 -15 0 0 101.833 15.8116 3
 -15 0 0 104.264 13.5249 3
 16 0 0 -10.528 11.036 3
 -16 0 0 11.3969 12.436 1
 -16 0 0 21.7291 12.2605 3
 16 0 0 12.3861 14.271 3
 -16 0 0 28.9627 14.8247 3
 0 -1 0 -0.3824 1.62931 1
 0 -1 0 0.911 2.11595 3
 0 -1 0 -3.2658 2.27894 3
 0 -1 0 1.28248 1.42491 2
 0 1 0 -2.935 2.44367 3
 0 1 0 -1.8925 1.46857 1
 0 1 0 -0.0451 1.4494 2
 1 -1 0 39.4167 4.20774 3
 -1 -1 0 38.1978 4.36863 3
 1 -1 0 30.7037 3.2869 3
 -1 -1 0 32.0301 3.9565 3
 1 -1 0 39.2495 4.00185 1
 1 1 0 44.027 5.62853 3
 -1 1 0 36.4904 3.59575 3
 -1 1 0 39.2217 3.73393 1
 1 1 0 37.955 4.68267 3
 -1 1 0 43.4244 4.15626 3
 2 -1 0 53.843 5.74668 1
 -2 -1 0 84.5677 5.9986 3
 2 -1 0 81.6827 6.6539 3
 2 -1 0 68.2053 5.67025 3
 -2 1 0 55.1262 5.71398 1
 -2 1 0 74.3429 5.53579 3
 2 1 0 84.9458 6.10895 3
 -3 -1 0 1943.62 46.3503 3
 -3 -1 0 1963.72 45.6641 3
 3 -1 0 1905.32 45.9169 3
 3 -1 0 1826.23 45.3928 3
 3 1 0 1908.94 45.6934 3
 -3 1 0 1818.9 45.8101 3
 -3 1 0 1970.99 45.8674 1
 -3 1 0 1876.86 45.4143 3
 3 1 0 1938.49 46.3012 3
 4 -1 0 379.901 12.7514 3
 -4 -1 0 421.08 14.5598 3
 -4 -1 0 389.781 13.0115 3
 4 -1 0 414.902 14.0452 3
 -4 1 0 412.683 14.0087 3
 -4 1 0 393.058 12.7449 3
 -4 1 0 416.027 13.3593 1
 4 1 0 402.493 14.2923 3
 4 1 0 389.068 13.0139 3
 -5 -1 0 854.984 23.1109 3
 -5 -1 0 840.044 24.298 3
 5 -1 0 816.478 22.8653 3
 5 -1 0 859.963 23.8131 3
 5 1 0 859.578 24.3212 3
 -5 1 0 834.243 22.793 3
 -5 1 0 850.802 23.8806 3
 5 1 0 835.917 23.1526 3
 -5 1 0 879.024 23.5316 1
 6 -1 0 80.7977 8.42705 3
 -6 -1 0 87.5585 10.9286 3
 6 -1 0 81.5741 10.0625 3
 -6 -1 0 76.557 8.72873 3
 -6 1 0 70.637 8.34944 3
 6 1 0 81.1681 10.5432 3
 -6 1 0 77.1833 9.84601 3
 -6 1 0 54.2571 6.65797 1
 6 1 0 69.5449 8.7404 3
 7 -1 0 4.32938 5.23364 3
 -7 -1 0 6.5306 6.60802 3
 -7 -1 0 6.16298 5.28256 3
 7 -1 0 3.61626 6.31538 3
 7 1 0 9.60856 6.66684 3
 -7 1 0 5.16539 6.54498 3
 7 1 0 3.90497 5.11498 3
 -7 1 0 -3.7645 5.15952 1
 -7 1 0 1.67785 4.93911 3
 8 -1 0 20.1408 7.15469 3
 -8 -1 0 21.7765 6.26579 3
 -8 -1 0 33.5667 7.59265 3
 8 -1 0 15.2996 6.17341 3
 -8 1 0 27.0374 7.62727 3
 -8 1 0 4.30431 5.55175 1
 8 1 0 22.7655 7.18221 3
 8 1 0 16.2326 5.9154 3
 -8 1 0 17.3562 5.83388 3
 -9 -1 0 1.21365 6.25128 3
 9 -1 0 -7.9114 5.86555 3
 -9 -1 0 -3.2429 7.13342 3
 9 -1 0 -0.5808 7.21113 3
 -9 1 0 1.65282 5.8084 3
 9 1 0 5.62138 7.66612 3
 -9 1 0 -8.0557 7.02584 3
 -9 1 0 -3.0988 5.98555 1
 9 1 0 -8.9857 5.68654 3
 -10 -1 0 344.088 18.8804 3
 10 -1 0 339.664 16.0843 3
 10 -1 0 361.35 18.1842 3
 -10 -1 0 374.096 16.888 3
 -10 1 0 351.489 17.1564 1
 10 1 0 372.596 18.9701 3
 -10 1 0 363.011 18.6251 3
 -10 1 0 366.418 16.6904 3
 10 1 0 363.674 16.8984 3
 11 -1 0 11.8537 9.20909 3
 -11 -1 0 8.66148 7.52295 1
 -11 -1 0 11.0866 9.45552 3
 -11 -1 0 13.9958 9.72005 3
 11 -1 0 18.5894 7.80375 3
 11 1 0 19.258 7.88281 3
 -11 1 0 15.5069 9.3577 3
 -11 1 0 26.9845 14.342 3
 11 1 0 16.7004 9.3344 3
 -11 1 0 10.5373 8.14664 1
 12 -1 0 160.923 17.7208 3
 -12 -1 0 155.687 15.09 1
 -12 -1 0 128.503 13.8634 3
 12 -1 0 122.051 14.1176 3
 -12 -1 0 154.557 15.0974 3
 12 1 0 137.34 14.7576 3
 -12 1 0 153.793 14.854 3
 -12 1 0 151.122 15.3644 1
 12 1 0 142.059 17.7546 3
 -12 1 0 132.728 13.6989 3
 -13 -1 0 309.351 19.3332 3
 13 -1 0 334.972 22.4952 3
 13 -1 0 312.751 19.2092 3
 -13 -1 0 315.469 19.0083 1
 -13 -1 0 337.67 22.5236 3
 -13 1 0 370.398 20.458 1
 -13 1 0 328.265 18.7672 3
 13 1 0 330.933 19.4438 3
 -13 1 0 298.151 22.022 3
 13 1 0 339.014 22.9301 3
 14 -1 0 52.7144 11.2368 3
 -14 -1 0 53.6417 11.3041 3
 -14 -1 0 64.3032 14.0971 3
 -14 -1 0 54.6211 11.4096 1
 14 -1 0 71.7597 13.5921 3
 -14 1 0 39.2074 10.3843 3
 -14 1 0 46.7422 13.2272 3
 14 1 0 62.1902 13.5281 3
 -14 1 0 71.0588 12.5702 1
 14 1 0 53.3015 11.0502 3
 -15 -1 0 125.366 17.4792 3
 -15 -1 0 172.734 17.6936 1
 15 -1 0 159.632 18.8179 3
 15 -1 0 187.253 23.3479 3
 -15 -1 0 152.53 19.5405 3
 -15 1 0 126.204 16.8034 3
 -15 1 0 162.913 20.5758 1
 15 1 0 179.994 19.0699 3
 15 1 0 186.282 24.663 3
 -15 1 0 136.446 18.957 3
 16 -1 0 2.04358 14.0663 3
 -16 -1 0 25.6246 12.3041 1
 -16 -1 0 8.61837 12.1406 3
 16 -1 0 -12.59 11.258 3
 -16 -1 0 7.07547 14.3074 3
 -16 1 0 -20.356 11.5914 3
 -16 1 0 5.53464 14.7252 3
 16 1 0 6.06501 15.8577 3
 16 1 0 10.8446 12.5469 3
 -16 1 0 3.29961 11.543 1
 0 -2 0 621.67 16.7376 3
 0 -2 0 610.698 17.2508 3
 0 -2 0 607.9 15.4999 1
 0 2 0 621.838 18.4651 3
 0 2 0 599.12 17.3324 3
 0 2 0 600.25 15.1393 2
 1 -2 0 343.341 10.5083 1
 -1 -2 0 338.997 13.677 3
 1 -2 0 358.696 9.50288 2
 1 -2 0 348.084 11.3877 3
 -1 -2 0 347.017 12.0308 3
 1 -2 0 346.224 12.0361 3
 -1 2 0 365.868 11.4408 3
 -1 2 0 360.056 10.5305 1
 1 2 0 341.09 13.4408 3
 1 2 0 340.558 12.11 3
 2 -2 0 45.9137 6.24266 1
 2 -2 0 70.229 7.20529 3
 -2 2 0 56.0205 6.33166 1
 -2 2 0 71.2182 6.87416 3
 3 -2 0 466.487 14.5828 3
 3 -2 0 479.366 15.5839 3
 3 -2 0 471.267 14.5302 1
 -3 -2 0 473.625 14.9037 3
 -3 -2 0 478.176 16.6213 3
 -3 2 0 470.322 14.4955 1
 -3 2 0 482.883 14.5575 3
 3 2 0 491.836 16.6773 3
 -3 2 0 484.339 15.5218 3
 3 2 0 481.851 15.0407 3
 -4 -2 0 1219.27 33.3459 3
 -4 -2 0 1261.7 32.2487 3
 4 -2 0 1218.67 31.9271 3
 4 -2 0 1255.71 32.5858 3
 -4 2 0 1322 32.4146 1
 -4 2 0 1259.56 31.8864 3
 4 2 0 1235.74 32.269 3
 -4 2 0 1234.77 32.7075 3
 4 2 0 1285.85 33.398 3
 -5 -2 0 553.513 19.1964 3
 5 -2 0 520.94 16.9783 3
 5 -2 0 552.276 18.0276 3
 -5 -2 0 562.813 17.6189 3
 -5 2 0 530.279 17.0539 3
 5 2 0 534.717 17.5086 3
 5 2 0 624.51 19.5941 3
 -5 2 0 568.191 18.4233 3
 -5 2 0 539.693 17.6806 1
 6 -2 0 297.764 12.782 3
 -6 -2 0 319.437 15.2593 3
 6 -2 0 293.765 14.1254 3
 -6 -2 0 308.347 13.0688 3
 -6 2 0 297.601 12.4921 3
 -6 2 0 303.378 13.2037 1
 -6 2 0 315.813 14.2139 3
 6 2 0 335.871 15.4404 3
 6 2 0 313.798 13.1417 3
 7 -2 0 30.396 6.97444 3
 7 -2 0 32.436 5.90566 3
 -7 -2 0 33.3514 6.25273 3
 -7 -2 0 30.4917 7.62693 3
 7 2 0 35.2851 6.47941 3
 -7 2 0 37.0993 7.15189 3
 7 2 0 27.3919 7.47315 3
 -7 2 0 45.0793 7.11357 1
 -7 2 0 32.9698 5.91722 3
 8 -2 0 475.69 18.6761 3
 -8 -2 0 439.184 17.0148 3
 -8 -2 0 452.591 19.3995 3
 8 -2 0 446.642 16.9973 3
 -8 2 0 448.111 16.8885 3
 -8 2 0 449.052 18.4365 3
 8 2 0 444.181 17.4557 3
 8 2 0 470.284 19.0078 3
 -8 2 0 424.818 17.4578 1
 -9 -2 0 168.798 15.9815 3
 -9 -2 0 176.937 13.0211 3
 9 -2 0 180.466 12.7912 3
 9 -2 0 200.73 14.5605 3
 9 2 0 203.651 16.1484 3
 -9 2 0 199.013 13.3402 1
 -9 2 0 177.711 12.3681 3
 -9 2 0 184.761 14.582 3
 9 2 0 174.999 12.9158 3
 -10 -2 0 127.784 16.2901 3
 10 -2 0 115.952 15.3274 3
 10 -2 0 126.104 13.2238 3
 -10 -2 0 111.807 12.9987 3
 -10 2 0 113.548 12.488 3
 10 2 0 121.497 12.9964 3
 -10 2 0 128.972 13.3572 1
 10 2 0 121.786 16.3698 3
 -10 2 0 110.714 12.0739 3
 -11 -2 0 101.806 11.1614 3
 11 -2 0 103.494 12.3159 3
 11 -2 0 104.426 14.4631 3
 -11 -2 0 95.5272 12.7322 3
 11 2 0 98.0735 11.004 3
 -11 2 0 97.278 14.3969 1
 -11 2 0 96.9508 12.338 3
 -11 2 0 97.7637 10.4171 3
 11 2 0 105.297 13.2861 3
 -12 -2 0 25.9124 9.6241 3
 -12 -2 0 20.8487 12.0453 3
 -12 -2 0 40.3272 8.99031 1
 12 -2 0 53.0849 11.557 3
 12 -2 0 39.1399 9.3538 3
 -12 2 0 42.1712 10.0057 1
 -12 2 0 39.6244 9.58093 3
 -12 2 0 24.1772 11.0914 3
 12 2 0 47.7229 9.97136 3
 12 2 0 24.9774 11.5045 3
 -13 -2 0 106.837 15.6196 3
 -13 -2 0 116.487 13.2511 3
 13 -2 0 112.554 14.1119 3
 -13 -2 0 95.6999 11.435 1
 13 -2 0 112.612 12.6242 3
 13 2 0 117.322 15.3201 3
 -13 2 0 114.432 16.5136 1
 13 2 0 99.7353 12.3159 3
 -13 2 0 107.346 15.147 3
 -13 2 0 98.7171 11.7569 3
 -14 -2 0 68.1895 11.6595 1
 -14 -2 0 74.7867 15.4157 3
 14 -2 0 103.965 14.9478 3
 -14 -2 0 128.027 17.7132 3
 14 -2 0 138.699 17.718 3
 -14 2 0 86.3577 11.9501 3
 -14 2 0 122.117 18.0667 1
 14 2 0 98.8111 15.6941 3
 14 2 0 83.6026 12.737 3
 -14 2 0 103.998 15.2556 3
 -15 -2 0 92.3915 13.7514 3
 15 -2 0 101.637 16.1661 3
 15 -2 0 81.8664 13.2343 3
 -15 -2 0 81.7909 12.8206 1
 -15 -2 0 61.1886 16.8879 3
 -15 2 0 69.7894 15.1036 3
 -15 2 0 68.487 14.211 1
 15 2 0 47.4245 12.3275 3
 -15 2 0 102.66 13.3394 3
 15 2 0 102.608 17.3055 3
 16 -2 0 -1.8042 13.729 3
 -16 -2 0 -12.858 12.7607 3
 16 -2 0 -4.1503 14.8767 3
 -16 -2 0 7.85327 10.9165 1
 -16 -2 0 2.80715 17.4233 3
 16 2 0 -18.292 12.589 3
 16 2 0 -7.0427 15.8564 3
 -16 2 0 -11.15 12.0281 3
 -16 2 0 -3.3501 16.1506 3
 -16 2 0 -2.0513 11.6874 1
 0 -3 0 -2.3162 3.25392 1
 0 -3 0 -4.1709 4.68867 3
 0 -3 0 -6.2823 4.31688 3
 0 3 0 1.64657 5.68314 3
 0 3 0 -5.5092 2.80156 2
 0 3 0 -0.8277 4.59004 3
 1 -3 0 849.183 21.8805 1
 -1 -3 0 831.877 22.9753 3
 -1 -3 0 860.852 23.6875 3
 1 -3 0 872.928 20.7889 2
 1 -3 0 867.896 23.8005 3
 1 -3 0 839.984 23.1013 3
 -1 -3 0 827.466 21.0658 1
 1 3 0 832.897 21.1585 2
 -1 3 0 835.153 21.7768 1
 -1 3 0 807.178 23.7557 3
 1 3 0 834.916 23.7582 3
 -1 3 0 878.909 23.0189 3
 1 3 0 854.593 25.1373 3
 2 -3 0 150.652 8.16026 1
 -2 -3 0 157.798 12.4885 3
 -2 -3 0 161.818 10.0473 3
 2 -3 0 144.073 10.0373 3
 2 -3 0 153.5 6.4536 2
 2 -3 0 142.447 9.12703 3
 2 3 0 153.264 11.7973 3
 -2 3 0 153.531 7.98685 1
 -2 3 0 158.244 10.3688 3
 2 3 0 159.426 10.1029 3
 -2 3 0 157.986 9.04702 3
 3 -3 0 1081.25 29.4355 3
 -3 -3 0 1093.78 29.224 3
 -3 -3 0 1083.17 30.9267 3
 3 -3 0 1066.02 28.7294 3
 3 -3 0 1068.64 28.4203 1
 3 3 0 1090.27 29.3461 3
 3 3 0 1096.93 30.8177 3
 -3 3 0 1056.35 29.4513 3
 -3 3 0 1087.8 28.3738 1
 -3 3 0 1107.27 28.7386 3
 4 -3 0 86.0772 10.1384 3
 4 -3 0 63.9874 8.66468 3
 -4 -3 0 53.2324 8.21786 3
 -4 -3 0 64.1631 8.961 3
 4 3 0 64.2951 8.52532 3
 4 3 0 66.7642 7.051 3
 -4 3 0 70.3053 8.63974 1
 -4 3 0 74.0819 8.78858 3
 -4 3 0 90.1489 10.6357 3
 -5 -3 0 592.57 18.6644 3
 -5 -3 0 571.713 20.6396 3
 5 -3 0 547.113 17.9991 3
 5 -3 0 545.985 18.987 3
 5 3 0 578.723 20.5892 3
 -5 3 0 528.699 19.1191 3
 -5 3 0 533.772 17.8158 3
 5 3 0 547.465 18.6106 3
 -5 3 0 545.456 18.0837 1
 6 -3 0 184.554 12.4557 3
 -6 -3 0 152.825 14.0007 3
 6 -3 0 169.832 11.1394 3
 -6 -3 0 174.666 11.3271 3
 6 3 0 172.564 13.3282 3
 -6 3 0 171.64 12.3307 3
 6 3 0 149.974 11.2644 3
 -6 3 0 171.698 11.1056 1
 -6 3 0 168.39 10.6845 3
 -7 -3 0 1089.69 31.0662 3
 -7 -3 0 1079.04 32.9869 3
 7 -3 0 1128.23 31.7274 3
 7 -3 0 1067.49 30.3683 3
 -7 3 0 1111.25 31.2069 1
 7 3 0 1083.71 33.0021 3
 7 3 0 1084.19 31.0676 3
 -7 3 0 1082.33 30.3016 3
 -7 3 0 1046.77 31.4273 3
 -8 -3 0 3.29789 6.21536 3
 -8 -3 0 4.31366 8.20447 3
 8 -3 0 -0.6149 7.30752 3
 8 -3 0 2.98314 6.13716 3
 8 3 0 1.78981 8.29569 3
 -8 3 0 5.68486 6.15711 3
 -8 3 0 10.1944 7.59741 3
 -8 3 0 -3.6068 6.13366 1
 8 3 0 9.23082 6.52407 3
 -9 -3 0 293.518 15.579 3
 9 -3 0 294.111 15.2018 3
 -9 -3 0 274.371 18.3198 3
 9 -3 0 270.205 16.6282 3
 9 3 0 294.057 15.68 3
 -9 3 0 287.904 16.0689 1
 -9 3 0 277.223 17.0903 3
 9 3 0 284.281 18.5727 3
 -9 3 0 276.501 14.7773 3
 10 -3 0 0.02582 7.8134 3
 -10 -3 0 10.2188 13.1948 3
 10 -3 0 14.9923 9.30106 3
 -10 -3 0 9.1918 10.109 3
 10 3 0 13.4673 7.68179 3
 10 3 0 -0.5667 9.37535 3
 -10 3 0 -8.3156 9.07826 3
 -10 3 0 3.42926 8.82714 3
 -11 -3 0 62.1785 13.1451 3
 -11 -3 0 63.5637 10.4856 3
 11 -3 0 55.5499 9.98516 3
 11 -3 0 65.9531 11.377 3
 -11 3 0 63.9152 9.88193 3
 11 3 0 62.503 12.6604 3
 11 3 0 62.5095 10.7055 3
 -11 3 0 53.3657 10.2306 1
 -11 3 0 75.4956 12.031 3
 12 -3 0 3.66448 9.62094 3
 12 -3 0 23.4978 10.6014 3
 -12 -3 0 8.87908 11.877 3
 -12 -3 0 27.86 9.87943 3
 -12 3 0 18.8621 11.804 3
 -12 3 0 18.6416 9.39343 1
 12 3 0 10.2916 9.24888 3
 -12 3 0 15.1553 9.38717 3
 12 3 0 18.0987 12.4917 3
 -13 -3 0 7.70336 10.9274 3
 13 -3 0 0.62104 10.3266 3
 13 -3 0 7.40373 11.5881 3
 -13 -3 0 -0.6818 12.8747 3
 -13 -3 0 -8.5021 8.46418 1
 -13 3 0 2.60557 9.36058 3
 13 3 0 10.0813 10.0745 3
 -13 3 0 10.9163 9.04992 1
 -13 3 0 -1.3013 12.7675 3
 13 3 0 38.6886 13.1584 3
 -14 -3 0 70.5514 11.731 1
 -14 -3 0 35.6864 15.579 3
 -14 -3 0 77.3634 13.0238 3
 14 -3 0 79.3404 13.2329 3
 14 -3 0 56.4514 14.9097 3
 14 3 0 61.9528 16.2458 3
 -14 3 0 62.1801 11.9207 3
 -14 3 0 69.2734 13.1333 1
 14 3 0 59.9647 12.2231 3
 -14 3 0 53.0195 14.6825 3
 -15 -3 0 14.1902 13.5426 3
 -15 -3 0 12.2037 16.6737 3
 15 -3 0 46.5774 16.3228 3
 -15 -3 0 15.3357 10.7271 1
 15 -3 0 33.4487 12.5524 3
 -15 3 0 29.1599 13.0264 1
 -15 3 0 35.1126 12.4776 3
 15 3 0 2.37879 12.0651 3
 -15 3 0 27.2306 15.5729 3
 15 3 0 10.7738 15.9039 3
 0 -4 0 109.844 9.5182 3
 0 -4 0 113.427 10.6413 3
 0 -4 0 99.0921 7.03634 1
 0 4 0 109.163 10.9914 3
 0 4 0 98.7817 6.22336 2
 0 4 0 133.942 12.881 3
 -1 -4 0 76.3873 10.0355 3
 -1 -4 0 73.5262 6.12048 1
 -1 -4 0 59.336 6.86341 3
 1 -4 0 70.2124 9.25172 3
 1 -4 0 89.9325 10.6954 3
 1 -4 0 66.8698 7.19129 1
 1 4 0 62.2186 6.16605 2
 1 4 0 78.9549 9.34688 3
 -1 4 0 82.7607 9.86915 3
 -1 4 0 89.3985 10.8077 3
 1 4 0 86.3522 10.5185 3
 2 -4 0 103.763 9.71331 3
 -2 -4 0 118.81 10.7065 3
 2 -4 0 91.7363 10.6876 3
 2 -4 0 118.446 8.32123 1
 2 -4 0 105.56 5.98213 2
 -2 -4 0 99.9076 6.15415 1
 2 4 0 110.135 13.1111 3
 -2 4 0 120.733 9.49593 3
 -2 4 0 108.415 8.09497 1
 2 4 0 104.375 7.06994 2
 -2 4 0 110.228 11.0967 3
 2 4 0 108.273 10.8328 3
 3 -4 0 166.737 11.9942 3
 3 -4 0 148.248 7.28485 2
 3 -4 0 127.37 9.88167 1
 -3 -4 0 206.427 14.588 3
 -3 -4 0 177.926 11.7111 3
 3 -4 0 145.592 11.2372 3
 -3 4 0 142.737 10.5116 3
 3 4 0 204.89 15.009 3
 3 4 0 178.252 12.2551 3
 -3 4 0 183.723 12.5451 3
 -3 4 0 144.61 9.63864 1
 4 -4 0 90.5008 9.87172 3
 4 -4 0 97.2794 6.87517 2
 -4 -4 0 102.198 10.2684 3
 -4 -4 0 82.7583 10.5821 3
 4 -4 0 90.5661 11.2514 3
 -4 4 0 101.698 9.28524 1
 -4 4 0 77.1346 9.49535 3
 4 4 0 100.63 11.249 3
 -4 4 0 86.57 11.6532 3
 4 4 0 88.3608 9.7551 3
 5 -4 0 521.782 19.23 3
 -5 -4 0 584.335 22.901 3
 5 -4 0 566.456 20.3026 3
 -5 -4 0 583.256 19.9216 3
 -5 4 0 571.884 18.8949 1
 -5 4 0 538.97 19.0289 3
 5 4 0 555.511 22.3736 3
 5 4 0 560.05 20.1278 3
 -5 4 0 541.053 20.7741 3
 6 -4 0 23.1908 6.78581 3
 -6 -4 0 27.7158 9.32238 3
 -6 -4 0 23.653 6.91799 3
 6 -4 0 29.4788 7.61694 3
 -6 4 0 22.7529 6.76657 1
 -6 4 0 18.7075 7.59125 3
 6 4 0 30.8101 7.6569 3
 6 4 0 38.177 9.02549 3
 -6 4 0 24.6691 6.53399 3
 -7 -4 0 37.8047 9.28445 3
 7 -4 0 54.7844 8.86101 3
 7 -4 0 33.0492 7.67541 3
 -7 -4 0 35.0502 7.67922 3
 7 4 0 37.6385 9.6156 3
 7 4 0 39.5193 7.9963 3
 -7 4 0 35.8846 8.54731 3
 -7 4 0 36.914 7.42338 3
 -7 4 0 39.2826 7.73633 1
 -8 -4 0 68.8977 11.4615 3
 -8 -4 0 51.997 8.46617 3
 8 -4 0 55.3606 10.0299 3
 8 -4 0 51.6942 8.61633 3
 -8 4 0 58.3422 9.15423 1
 8 4 0 48.8363 11.1691 3
 -8 4 0 64.0901 9.90842 3
 -8 4 0 55.7078 8.23364 3
 8 4 0 57.5736 9.07292 3
 -9 -4 0 23.5673 13.245 3
 9 -4 0 33.9376 8.953 3
 -9 -4 0 40.0925 11.0566 3
 9 -4 0 39.6543 10.2539 3
 -9 4 0 51.5289 10.8695 1
 -9 4 0 36.9015 8.43883 3
 9 4 0 41.2371 9.07908 3
 -9 4 0 40.0667 10.3147 3
 9 4 0 51.7962 11.9004 3
 -10 -4 0 5.0031 8.07987 3
 -10 -4 0 11.3866 11.5415 3
 10 -4 0 4.97224 8.54938 3
 10 -4 0 29.2183 10.3119 3
 -10 4 0 0.77071 7.74134 3
 -10 4 0 -2.297 9.95124 3
 10 4 0 26.7336 11.9505 3
 -10 4 0 -0.5231 8.5656 1
 10 4 0 -8.7697 7.93944 3
 11 -4 0 80.5601 12.8157 3
 -11 -4 0 82.9941 11.7566 3
 11 -4 0 71.8673 11.1748 3
 -11 -4 0 75.5849 14.115 3
 11 4 0 64.7832 11.1638 3
 11 4 0 92.8001 15.0753 3
 -11 4 0 64.9063 11.609 1
 -11 4 0 97.6792 13.4868 3
 -11 4 0 79.1812 11.3437 3
 12 -4 0 -24.376 9.97551 3
 -12 -4 0 4.34053 9.63521 3
 12 -4 0 -5.3344 10.3118 3
 -12 -4 0 -5.7017 13.0876 3
 12 4 0 -4.7001 9.47789 3
 -12 4 0 0.75817 9.75565 1
 -12 4 0 2.29009 12.0863 3
 -12 4 0 7.50247 9.37063 3
 12 4 0 17.344 13.0049 3
 -13 -4 0 12.8598 15.2382 3
 13 -4 0 17.615 11.8862 3
 -13 -4 0 19.209 11.6379 3
 -13 -4 0 11.4981 14.8258 1
 13 -4 0 9.72118 12.9285 3
 -13 4 0 21.4042 11.1035 3
 13 4 0 29.1082 11.5492 3
 -13 4 0 11.244 11.2115 1
 13 4 0 11.8056 14.4582 3
 -13 4 0 30.3051 13.2262 3
 14 -4 0 -0.9776 14.5741 3
 14 -4 0 3.93258 13.4485 3
 -14 -4 0 -32.906 16.1439 3
 -14 -4 0 12.8396 12.7638 3
 -14 -4 0 -9.2268 8.90674 1
 14 4 0 7.24937 12.2638 3
 14 4 0 6.04976 15.7237 3
 -14 4 0 20.0844 12.7187 1
 -14 4 0 21.8764 11.9738 3
 -14 4 0 -0.6378 15.3208 3
 -15 -4 0 6.88453 10.277 1
 -15 -4 0 -19.1 18.443 3
 15 -4 0 22.7938 16.3053 3
 -15 -4 0 -5.1888 15.0389 3
 15 -4 0 -4.5517 14.3125 3
 -15 4 0 1.22304 13.2827 3
 -15 4 0 2.13423 17.7392 3
 -15 4 0 46.9247 15.7045 1
 15 4 0 1.68801 17.6128 3
 0 -5 0 -5.2636 6.14927 3
 0 -5 0 -5.4552 4.07316 1
 0 -5 0 -5.143 6.18446 3
 0 5 0 -6.0939 3.8192 2
 0 5 0 -0.6547 6.74303 3
 0 5 0 -12.211 7.76912 3
 -1 -5 0 546.007 19.6461 3
 1 -5 0 546.269 20.6737 3
 1 -5 0 566.899 17.5515 1
 -1 -5 0 571.221 16.3769 1
 -1 -5 0 576.842 20.7542 3
 1 -5 0 582.917 19.7971 3
 -1 5 0 555.122 23.0996 3
 1 5 0 562.409 20.9041 3
 1 5 0 592.342 23.2987 3
 1 5 0 543.631 16.0419 2
 -1 5 0 567.321 21.2061 3
 -2 -5 0 81.1611 10.9577 3
 -2 -5 0 98.52 11.8787 3
 -2 -5 0 78.9557 6.84997 1
 2 -5 0 83.9876 9.33913 3
 2 -5 0 77.9328 8.37192 3
 2 -5 0 78.7063 9.21912 1
 2 5 0 78.0924 7.4034 2
 -2 5 0 96.4946 12.5313 3
 2 5 0 99.6459 11.3633 3
 -2 5 0 91.4465 11.0344 3
 -2 5 0 83.1329 8.35896 1
 2 5 0 95.1268 12.0315 3
 3 -5 0 703.701 21.4902 1
 -3 -5 0 684.915 23.5562 3
 3 -5 0 707.106 23.9641 3
 3 -5 0 679.569 22.8942 3
 -3 -5 0 656.755 18.5129 1
 3 5 0 686.941 25.874 3
 3 5 0 668.322 19.712 2
 -3 5 0 695.749 22.4512 3
 3 5 0 705.979 24.0678 3
 -3 5 0 704.294 21.0225 1
 -3 5 0 688.254 24.4848 3
 4 -5 0 9.32289 7.46329 3
 4 -5 0 0.32257 6.19625 3
 4 -5 0 16.6859 4.22543 2
 -4 -5 0 5.96672 6.90283 3
 -4 -5 0 5.5538 9.69297 3
 -4 5 0 2.9659 6.66047 3
 4 5 0 12.5028 7.5159 3
 4 5 0 21.6148 9.76837 3
 -4 5 0 1.46873 8.0003 3
 -4 5 0 7.66069 5.86205 1
 -5 -5 0 343.034 16.8522 3
 5 -5 0 334.733 12.2635 2
 5 -5 0 326.636 17.1944 3
 5 -5 0 327.472 16.5759 3
 -5 -5 0 316.911 20.7071 3
 -5 5 0 332.033 15.1822 1
 5 5 0 375.311 21.0937 3
 -5 5 0 319.288 18.1429 3
 5 5 0 337.331 17.588 3
 -5 5 0 313.476 15.7868 3
 6 -5 0 123.658 9.7092 2
 6 -5 0 136.562 14.8727 3
 6 -5 0 139.883 13.7714 3
 -6 -5 0 144.844 17.4547 3
 -6 -5 0 134.235 13.7553 3
 -6 5 0 134.171 12.5396 1
 6 5 0 119.724 14.6704 3
 -6 5 0 108.937 12.5318 3
 -6 5 0 116.267 11.9234 3
 6 5 0 123.196 13.4358 3
 7 -5 0 4.05503 7.99834 3
 -7 -5 0 22.1476 11.0878 3
 7 -5 0 12.7851 8.64767 3
 -7 -5 0 -6.2076 7.8003 3
 7 5 0 10.3746 8.32406 3
 -7 5 0 12.6054 8.74436 3
 -7 5 0 13.8385 8.97615 3
 7 5 0 9.45923 10.355 3
 -7 5 0 6.40899 7.54357 1
 8 -5 0 176.404 20.3707 3
 8 -5 0 198.672 17.7883 3
 -8 -5 0 193.687 21.4985 3
 -8 -5 0 174.808 16.8464 3
 8 5 0 192.95 19.3861 3
 -8 5 0 169.18 16.8291 3
 8 5 0 180.009 17.3589 3
 -8 5 0 207.784 16.2235 1
 -8 5 0 184.207 15.679 3
 -9 -5 0 3.63487 11.9529 3
 9 -5 0 7.88845 9.84873 3
 -9 -5 0 22.9901 9.40601 3
 9 -5 0 15.5904 8.78803 3
 9 5 0 1.46284 11.4405 3
 -9 5 0 19.3327 10.6823 3
 -9 5 0 10.8264 9.2139 1
 9 5 0 9.26352 9.57759 3
 -9 5 0 1.9856 8.06519 3
 10 -5 0 179.665 19.8225 3
 -10 -5 0 149.902 17.7269 3
 -10 -5 0 154.131 17.503 3
 10 -5 0 172.543 17.3803 3
 10 5 0 178.976 18.7589 3
 10 5 0 162.886 18.5565 3
 -10 5 0 163.388 18.5532 1
 -10 5 0 165.048 16.7355 3
 -10 5 0 154.413 20.2441 3
 11 -5 0 96.5811 14.3077 3
 -11 -5 0 114.207 17.7021 3
 -11 -5 0 159.682 18.1361 3
 11 -5 0 95.1171 12.9514 3
 -11 5 0 114.926 13.3725 3
 11 5 0 182.471 24.816 3
 -11 5 0 100.734 14.0011 1
 -11 5 0 104.628 15.7413 3
 11 5 0 125.31 14.0663 3
 12 -5 0 104.969 14.419 3
 -12 -5 0 91.487 16.9274 3
 12 -5 0 107.046 16.1711 3
 -12 -5 0 101.475 14.4613 3
 12 5 0 84.5494 14.0393 3
 -12 5 0 90.7563 15.6283 3
 12 5 0 76.6099 16.8921 3
 -12 5 0 89.257 15.0615 1
 -12 5 0 65.893 12.5473 3
 13 -5 0 17.4722 12.8021 3
 13 -5 0 8.8039 15.1805 3
 -13 -5 0 40.4867 12.9655 3
 -13 -5 0 -11.075 16.3225 3
 -13 5 0 32.3393 13.3149 3
 -13 5 0 34.2826 16.243 3
 13 5 0 30.1801 13.3987 3
 -13 5 0 16.884 13.727 1
 13 5 0 65.2243 16.8997 3
 -14 -5 0 52.4287 15.4467 3
 -14 -5 0 32.5557 20.8893 3
 -14 -5 0 21.6796 9.75702 1
 14 -5 0 11.6105 15.7229 3
 14 -5 0 33.6986 15.1397 3
 14 5 0 26.4739 15.3797 3
 -14 5 0 49.8039 16.5248 1
 -14 5 0 34.7558 17.8067 3
 14 5 0 55.2602 18.7386 3
 -14 5 0 63.9899 15.6039 3
 0 -6 0 123.021 13.5862 3
 0 -6 0 126.792 9.94566 1
 0 -6 0 127.624 14.3384 3
 0 6 0 131.484 15.2304 3
 0 6 0 110.47 13.3004 3
 -1 -6 0 -2.2948 6.99187 3
 1 -6 0 11.1074 5.98939 1
 1 -6 0 10.2656 7.78599 3
 -1 -6 0 10.2028 4.98933 1
 1 -6 0 -2.952 7.61416 3
 -1 -6 0 16.4623 7.62682 3
 1 6 0 12.5776 5.03233 2
 1 6 0 -0.2026 9.90158 3
 -1 6 0 5.54847 10.3308 3
 -1 6 0 11.7026 8.72505 3
 1 6 0 4.66968 8.39555 3
 -2 -6 0 105.212 14.5916 3
 2 -6 0 135.282 11.2206 1
 -2 -6 0 112.921 8.22561 1
 2 -6 0 105.746 13.4506 3
 -2 -6 0 106.417 13.1558 3
 2 -6 0 115.694 14.8519 3
 2 6 0 129.921 15.3465 3
 -2 6 0 108.951 13.3164 3
 2 6 0 101.151 12.5592 3
 -2 6 0 117.218 15.308 3
 2 6 0 117.13 8.74927 2
 -3 -6 0 86.9783 10.7182 3
 3 -6 0 74.7286 10.045 3
 3 -6 0 79.7741 10.8381 3
 -3 -6 0 72.9591 7.51286 1
 -3 -6 0 66.2577 10.0972 3
 -3 6 0 82.4275 13.1783 3
 -3 6 0 99.6928 11.6064 3
 3 6 0 86.2157 12.7817 3
 3 6 0 75.9745 8.72432 2
 3 6 0 89.4538 11.1506 3
 4 -6 0 194.429 16.6713 3
 -4 -6 0 151.526 8.61775 1
 -4 -6 0 180.405 15.7288 3
 4 -6 0 148.3 14.4661 3
 -4 -6 0 165.83 14.6079 3
 -4 6 0 158.692 17.1881 3
 4 6 0 162.483 19.9067 3
 4 6 0 158.06 10.7015 2
 -4 6 0 141.662 12.3636 1
 4 6 0 158.618 16.6852 3
 5 -6 0 45.1034 9.31826 3
 -5 -6 0 40.1076 9.55325 3
 5 -6 0 55.1749 10.6867 3
 -5 -6 0 40.9241 5.28422 1
 5 6 0 47.3718 7.45249 2
 5 6 0 52.393 13.0379 3
 -5 6 0 47.2418 10.5251 3
 -5 6 0 45.7395 8.74652 1
 -5 6 0 35.9288 15.4108 3
 5 6 0 33.0372 10.3052 3
 6 -6 0 -1.3653 15.383 3
 -6 -6 0 11.0638 15.9434 3
 -6 -6 0 -5.3052 11.0508 3
 6 -6 0 6.76869 5.62208 2
 6 -6 0 2.27552 9.59187 3
 -6 6 0 10.4891 8.26805 3
 6 6 0 14.7888 12.3798 3
 -6 6 0 9.0265 8.17618 1
 -6 6 0 -12.907 9.90463 3
 6 6 0 -2.4331 9.29522 3
 -7 -6 0 -0.6536 8.3553 3
 7 -6 0 6.47943 9.09004 3
 7 -6 0 5.21441 6.33261 2
 -7 -6 0 5.80928 12.5565 3
 7 -6 0 9.32886 9.75248 3
 7 6 0 19.6466 10.3562 3
 7 6 0 3.684 11.8722 3
 -7 6 0 -3.5944 10.058 3
 -7 6 0 1.54363 9.91379 1
 -7 6 0 11.8572 9.11165 3
 8 -6 0 146.317 18.2129 3
 -8 -6 0 77.8876 14.4832 3
 -8 -6 0 108.367 12.6427 3
 8 -6 0 123.213 11.7402 2
 8 -6 0 109.047 12.5989 3
 -8 6 0 108.389 12.2993 3
 8 6 0 84.6949 13.2703 3
 8 6 0 115.863 16.054 3
 -8 6 0 107.728 12.4432 1
 -8 6 0 108.685 14.0861 3
 9 -6 0 1.18685 8.30824 2
 -9 -6 0 27.3652 14.4795 3
 9 -6 0 9.81327 10.2688 3
 9 -6 0 -1.8641 11.3932 3
 -9 -6 0 12.8072 10.2986 3
 -9 6 0 12.9498 10.183 1
 -9 6 0 -4.7034 9.48582 3
 9 6 0 -8.2212 11.1249 3
 -9 6 0 21.2471 12.5837 3
 9 6 0 -12.705 13.4727 3
 10 -6 0 39.7116 13.4041 3
 10 -6 0 34.6404 11.8307 3
 -10 -6 0 67.6407 18.3023 3
 -10 -6 0 26.4675 11.4431 3
 10 6 0 47.7455 13.4093 3
 10 6 0 35.8178 16.0814 3
 -10 6 0 45.1391 12.5449 1
 -10 6 0 20.5816 10.7569 3
 -10 6 0 62.5681 14.3766 3
 11 -6 0 32.0971 12.4699 3
 -11 -6 0 46.7532 17.7958 3
 11 -6 0 21.2855 13.9982 3
 -11 -6 0 31.7917 12.0927 3
 -11 6 0 34.9716 12.4701 3
 11 6 0 21.3363 12.8738 3
 -11 6 0 33.838 13.0666 1
 11 6 0 18.553 17.6462 3
 -11 6 0 43.2718 15.279 3
 -12 -6 0 3.97645 7.79707 1
 12 -6 0 6.42675 12.795 3
 -12 -6 0 20.2837 12.766 3
 12 -6 0 -1.893 15.1801 3
 -12 -6 0 58.1681 20.6103 3
 -12 6 0 18.5307 16.4079 3
 12 6 0 32.8651 19.2768 3
 12 6 0 6.00445 13.9293 3
 -12 6 0 30.3782 13.1783 3
 -12 6 0 -10.975 12.7038 1
 0 -7 0 -5.1771 9.86376 3
 0 -7 0 3.62518 6.27627 1
 0 -7 0 -2.5934 8.65356 3
 0 7 0 2.28819 12.3582 3
 0 7 0 -5.9533 9.43005 3
 -1 -7 0 27.7396 10.817 3
 -1 -7 0 17.8629 6.36648 1
 -1 -7 0 22.472 9.69191 3
 1 -7 0 20.7971 9.76355 3
 1 -7 0 37.4178 7.81782 1
 1 -7 0 23.6469 9.58395 3
 1 7 0 19.8879 13.7473 3
 -1 7 0 4.82128 12.8103 3
 1 7 0 21.1077 10.3536 3
 1 7 0 33.1988 6.15618 2
 -1 7 0 24.9646 10.2956 3
 -2 -7 0 -13.076 9.41357 3
 -2 -7 0 -1.909 5.32409 1
 2 -7 0 6.6094 9.34874 3
 2 -7 0 -6.7322 9.80906 3
 -2 -7 0 23.8251 9.05433 3
 2 7 0 -0.997 11.7725 3
 -2 7 0 -9.9649 9.89299 3
 -2 7 0 -13.69 13.5175 3
 2 7 0 4.33894 10.0665 3
 2 7 0 14.3704 6.05739 2
 -3 -7 0 85.2785 11.2975 3
 -3 -7 0 84.6375 12.6821 3
 -3 -7 0 87.9928 8.46332 1
 3 -7 0 68.771 11.7999 3
 3 7 0 81.9588 12.514 3
 -3 7 0 81.0346 14.6808 3
 3 7 0 74.7611 15.4914 3
 3 7 0 81.4312 10.1635 2
 -3 7 0 77.4453 12.8775 3
 4 -7 0 36.0346 11.1874 3
 -4 -7 0 0.07536 10.1043 3
 4 -7 0 34.7679 10.6536 3
 -4 -7 0 21.6732 5.15085 1
 -4 -7 0 -4.3162 9.44029 3
 4 7 0 16.6143 14.2222 3
 -4 7 0 9.3197 11.7114 3
 4 7 0 21.9396 6.98847 2
 4 7 0 20.2991 11.4054 3
 -4 7 0 33.204 13.9011 3
 5 -7 0 14.0939 10.1362 3
 -5 -7 0 10.7261 9.85039 3
 -5 -7 0 11.8337 5.04761 1
 5 -7 0 25.6765 11.7489 3
 -5 -7 0 13.7506 10.7571 3
 -5 7 0 18.428 12.0607 3
 5 7 0 4.41916 14.5558 3
 5 7 0 23.1254 7.64575 2
 -5 7 0 22.6082 8.82699 1
 -5 7 0 -0.0342 13.7064 3
 5 7 0 21.3953 10.711 3
 -6 -7 0 11.2657 11.271 3
 6 -7 0 24.8316 11.3397 3
 -6 -7 0 12.7096 5.15073 1
 -6 -7 0 -2.4341 10.4473 3
 6 -7 0 13.1876 11.7028 3
 -6 7 0 -6.7155 11.7615 3
 6 7 0 12.727 8.00047 2
 6 7 0 16.2477 11.1953 3
 6 7 0 21.3317 14.9269 3
 -7 -7 0 8.92735 11.433 3
 -7 -7 0 15.6654 5.37429 1
 7 -7 0 23.2783 11.8681 3
 7 -7 0 -0.2724 12.1113 3
 7 7 0 11.6488 8.57119 2
 7 7 0 -16.181 11.4875 3
 -7 7 0 -6.0684 11.7231 3
 7 7 0 35.2196 16.0329 3
 -7 7 0 4.0558 10.1515 1
 -7 7 0 13.0016 10.6141 3
 -8 -7 0 28.7184 15.7297 3
 -8 -7 0 22.5392 12.6179 3
 8 -7 0 29.1227 13.7415 3
 8 -7 0 6.04609 11.7518 3
 -8 7 0 15.4807 11.1223 1
 -8 7 0 34.9219 13.7381 3
 8 7 0 -2.9986 15.6848 3
 8 7 0 10.717 12.8212 3
 -8 7 0 37.4963 11.8946 3
 9 -7 0 99.466 16.1301 3
 9 -7 0 60.4171 14.2735 3
 -9 -7 0 61.8498 13.4723 3
 9 -7 0 45.7842 9.13454 2
 -9 -7 0 88.7758 20.2861 3
 9 7 0 50.1379 14.1642 3
 -9 7 0 58.1468 15.1761 3
 9 7 0 65.6264 16.5165 3
 -9 7 0 81.1398 13.5559 1
 -9 7 0 70.1408 13.4709 3
 -10 -7 0 -7.2512 12.8058 3
 10 -7 0 -4.5766 13.283 3
 10 -7 0 18.3438 9.59663 2
 10 -7 0 -6.0284 14.204 3
 -10 -7 0 -1.6884 16.7244 3
 10 7 0 5.04719 13.6927 3
 -10 7 0 31.162 13.531 1
 -10 7 0 -8.3259 14.8319 3
 10 7 0 12.7438 18.5797 3
 -10 7 0 -15.643 12.2612 3
 -11 -7 0 -9.3833 6.88467 1
 -11 -7 0 -3.4074 20.4545 3
 11 -7 0 -1.0542 13.6872 3
 -11 -7 0 11.348 14.6426 3
 11 -7 0 24.9234 11.2287 2
 11 -7 0 49.2138 15.5194 3
 11 7 0 9.6632 20.5338 3
 -11 7 0 11.9313 17.9586 3
 -11 7 0 21.5632 14.716 1
 11 7 0 10.214 14.4513 3
 -11 7 0 8.57203 14.6202 3
 0 -8 0 29.4378 12.9827 3
 0 -8 0 54.3677 12.511 3
 0 8 0 45.1905 16.9131 3
 0 8 0 52.4497 13.6241 3
 1 -8 0 15.567 12.8001 3
 -1 -8 0 15.7744 11.6716 3
 -1 -8 0 33.3883 13.5839 3
 1 -8 0 2.1077 11.2578 3
 -1 8 0 33.1069 15.8506 3
 1 8 0 20.6849 17.0955 3
 1 8 0 3.79162 21.8656 3
 -1 8 0 29.3819 13.2797 3
 -2 -8 0 39.9283 13.7384 3
 -2 -8 0 29.723 7.10388 1
 2 -8 0 52.6701 12.9958 3
 -2 -8 0 10.979 16.196 3
 2 -8 0 21.781 12.7772 3
 2 8 0 34.8736 14.9975 3
 2 8 0 25.0611 12.7868 3
 -2 8 0 21.1035 16.8174 3
 -2 8 0 15.4408 13.0617 3
 3 -8 0 5.96826 12.5229 3
 -3 -8 0 49.9344 20.8436 3
 3 -8 0 7.24602 11.4585 3
 -3 -8 0 35.3648 6.40948 1
 -3 -8 0 49.6866 13.2704 3
 3 8 0 5.20598 16.4569 3
 3 8 0 31.4541 7.84774 2
 -3 8 0 37.5552 13.7661 3
 3 8 0 27.8409 13.5433 3
 -3 8 0 -13.721 15.5788 3
 4 -8 0 116.011 14.8217 3
 4 -8 0 185.781 22.7301 3
 -4 -8 0 107.569 14.7718 3
 -4 -8 0 129.709 15.7371 3
 -4 8 0 103.346 17.8817 3
 4 8 0 95.3745 19.3892 3
 4 8 0 96.8959 16.0975 3
 4 8 0 93.7376 12.3053 2
 -4 8 0 138.357 17.7539 3
 -5 -8 0 -12.326 11.3334 3
 5 -8 0 26.7212 13.064 3
 5 -8 0 3.61682 12.0981 3
 -5 -8 0 2.27188 12.7729 3
 5 8 0 7.50966 16.589 3
 5 8 0 12.8505 13.1052 3
 5 8 0 5.4215 8.52785 2
 -5 8 0 35.6603 17.3319 3
 -5 8 0 -4.7406 13.1949 3
 -6 -8 0 101.401 14.8388 3
 -6 -8 0 93.9284 15.9973 3
 6 -8 0 125.265 16.9036 3
 6 -8 0 116.7 16.0046 3
 6 8 0 128.291 14.6995 2
 6 8 0 128.291 22.2696 3
 -6 8 0 107.025 17.651 3
 -6 8 0 124.308 20.2824 3
 -7 -8 0 -32.462 12.7841 3
 -7 -8 0 14.0899 13.7501 3
 7 -8 0 -7.5886 15.1048 3
 7 -8 0 11.1023 13.0035 3
 7 8 0 -15.06 13.5599 3
 -7 8 0 -1.7583 11.4609 1
 -7 8 0 -22.218 17.8376 3
 -7 8 0 -29.72 13.9252 3
 7 8 0 0.39369 9.60081 2
 7 8 0 5.8037 18.797 3
 8 -8 0 22.9946 15.4257 3
 8 -8 0 6.05253 14.1706 3
 -8 -8 0 25.693 14.7538 3
 -8 -8 0 17.1561 15.2719 3
 -8 8 0 8.61045 12.5879 1
 8 8 0 8.70849 19.4137 3
 -8 8 0 70.971 17.8398 3
 8 8 0 26.8622 11.3555 2
 8 8 0 26.3655 15.3958 3
 0 -9 0 -20.283 14.4359 3
 0 -9 0 5.39896 14.8221 3
 0 9 0 27.3025 15.7477 3
 0 9 0 7.64114 18.6932 3
 -1 -9 0 6.01305 15.1618 3
 -1 -9 0 -3.6592 14.7899 3
 1 -9 0 13.2773 15.0884 3
 -1 9 0 -34.515 17.8318 3
 -1 9 0 -36.426 15.5386 3
 1 9 0 -18.367 14.0068 3
 1 9 0 14.493 18.2068 3
 -2 -9 0 5.47201 14.2855 3
 -2 -9 0 -6.0992 14.2373 3
 2 -9 0 22.1552 13.5667 3
 2 -9 0 6.75989 14.5809 3
 -2 9 0 16.1783 18.2287 3
 2 9 0 -14.887 14.88 3
 -2 9 0 19.0432 15.9571 3
 2 9 0 1.68573 19.1419 3
 3 -9 0 -21.355 14.3251 3
 3 -9 0 14.8141 15.2319 3
 -3 -9 0 -7.4935 14.663 3
 -3 -9 0 1.62192 13.8712 3
 3 9 0 18.5716 20.5685 3
 3 9 0 2.03868 15.9178 3
 -3 9 0 -3.3386 19.9665 3
 -3 9 0 9.85127 16.0768 3
 -16 0 1 -0.1738 11.8294 1
 16 0 -1 -1.612 10.8604 3
 -16 0 1 0.87114 11.5622 3
 -16 0 1 5.10956 14.0924 3
 16 0 -1 -11.015 14.0208 3
 15 0 -1 4.1483 9.13463 3
 -15 0 1 0.67192 10.1877 3
 -15 0 1 -9.9713 9.98285 1
 15 0 -1 10.7553 12.9599 3
 -15 0 1 0.61623 12.261 3
 14 0 -1 -3.6437 11.3702 3
 -14 0 1 18.9881 9.8012 3
 -14 0 1 24.9863 9.72394 1
 -14 0 1 16.4431 11.7111 3
 14 0 -1 3.1841 9.07296 3
 -13 0 1 11.0362 10.9835 3
 -13 0 1 -3.965 8.57353 3
 -13 0 1 11.8546 8.80596 1
 13 0 -1 18.1752 10.6459 3
 13 0 -1 20.8663 8.56653 3
 12 0 -1 -1.5586 7.44454 3
 12 0 -1 10.9798 9.97418 3
 -12 0 1 9.61967 7.21338 3
 -12 0 1 4.77145 12.8261 1
 -12 0 1 -3.9955 9.52384 3
 11 0 -1 3.42846 6.87056 3
 -11 0 1 14.7829 7.2208 3
 -11 0 1 -6.2055 7.30759 1
 11 0 -1 -1.4336 8.67284 3
 -11 0 1 5.08857 8.62807 3
 -10 0 1 -0.4798 6.28075 1
 -10 0 1 2.75969 6.17655 3
 -10 0 1 0.4106 7.59482 3
 10 0 -1 -0.1165 5.79588 3
 10 0 -1 8.98755 7.9736 3
 -9 0 1 4.74329 5.74365 3
 9 0 -1 19.5702 7.61777 3
 9 0 -1 12.6201 5.76224 3
 -9 0 1 17.7733 7.66304 3
 -8 0 1 -4.3676 6.52981 3
 8 0 -1 5.57035 6.53051 3
 -8 0 1 -6.2523 5.12518 1
 -8 0 1 -1.2853 5.00731 3
 8 0 -1 -11.319 5.04531 3
 -7 0 1 -1.1664 6.10334 3
 -7 0 1 -1.443 4.76183 1
 -7 0 1 3.17194 4.85366 3
 7 0 -1 -1.8166 4.65202 3
 7 0 -1 -0.781 5.96291 3
 6 0 -1 5.84798 5.73841 3
 -6 0 1 7.74644 5.77535 3
 6 0 -1 -0.4482 4.33592 3
 -6 0 1 -1.7677 4.30265 3
 -6 0 1 -3.1962 4.4981 1
 5 0 -1 3.32527 5.23309 3
 -5 0 1 1.33152 4.09419 1
 -5 0 1 2.75972 5.33321 3
 5 0 -1 4.10499 4.1025 3
 -5 0 1 1.623 4.09569 3
 -4 0 1 0.75657 3.62304 1
 4 0 -1 1.93554 4.78886 3
 -4 0 1 2.07851 5.73736 3
 -4 0 1 1.10733 3.74426 3
 4 0 -1 -2.1477 3.74303 3
 3 0 -1 -0.3009 3.50364 3
 -3 0 1 -0.0011 3.50238 1
 3 0 -1 12.794 4.4902 3
 -3 0 1 4.1005 3.30636 3
 3 0 1 5.42269 4.02261 3
 -3 0 -1 3.89608 3.96715 3
 4 0 1 2.74159 4.48205 3
 4 0 1 6.49384 5.53707 3
 -4 0 -1 7.56429 5.53088 3
 -4 0 -1 7.35609 4.20096 3
 -5 0 -1 4.58554 4.39868 3
 5 0 1 12.422 5.88631 3
 -5 0 -1 11.357 5.80639 3
 5 0 1 7.64929 4.50909 3
 -6 0 -1 3.72873 6.25944 3
 -6 0 -1 5.82943 4.86932 3
 6 0 1 -6.6968 5.98419 3
 6 0 1 -1.2935 4.89135 3
 7 0 1 3.2341 5.29881 3
 -7 0 -1 1.4375 5.01067 3
 -7 0 -1 3.20631 6.28221 3
 7 0 1 7.04169 6.61991 3
 8 0 1 -6.2276 6.70695 3
 8 0 1 -5.1542 5.08365 3
 -8 0 -1 -2.2634 5.59083 3
 -8 0 -1 2.42464 6.91498 3
 -9 0 -1 8.35977 7.6944 3
 -9 0 -1 9.51812 6.02448 3
 9 0 1 12.649 7.51195 3
 9 0 1 9.82752 6.2401 3
 -10 0 -1 1.67744 8.12978 3
 -10 0 -1 11.8086 6.76566 3
 10 0 1 8.97185 8.73134 3
 10 0 1 9.49229 6.66211 3
 -11 0 -1 -13.385 7.0389 1
 -11 0 -1 8.49449 7.2966 3
 -11 0 -1 8.48133 9.2793 3
 11 0 1 5.31991 7.19686 3
 11 0 1 -4.9125 9.38391 3
 -12 0 -1 36.3031 10.7351 3
 12 0 1 26.136 10.8242 3
 -12 0 -1 28.9951 8.69852 3
 12 0 1 13.6401 8.11156 3
 -12 0 -1 9.9394 8.26639 1
 -13 0 -1 17.2475 9.30451 3
 -13 0 -1 -9.3756 11.0621 3
 13 0 1 2.38379 9.02542 3
 -13 0 -1 -6.5334 8.58146 1
 13 0 1 8.50324 11.3082 3
 -14 0 -1 -2.7639 9.4399 3
 14 0 1 -6.4971 9.58627 3
 14 0 1 11.6617 12.2267 3
 -14 0 -1 0.83704 9.45529 1
 -14 0 -1 -0.3767 11.8258 3
 15 0 1 -8.6491 10.6218 3
 -15 0 -1 8.68387 10.1205 3
 -15 0 -1 -4.5872 12.9983 3
 -15 0 -1 16.37 10.269 1
 15 0 1 16.1898 14.0356 3
 16 0 1 1.78181 14.2921 3
 16 0 1 5.61297 11.4464 3
 -16 0 -1 12.7159 15.1627 3
 -16 0 -1 26.6274 13.0876 1
 16 -1 -1 5.80741 10.8711 3
 -16 -1 1 13.4014 12.3514 1
 -16 -1 1 10.7726 14.7993 3
 16 -1 -1 -16.095 14.6165 3
 -16 -1 1 31.8238 11.873 3
 -16 1 1 1.93356 14.4979 3
 16 1 -1 -5.5119 14.7627 3
 16 1 -1 5.44476 11.7435 3
 -16 1 1 8.13713 11.0282 1
 -16 1 1 -12.8 11.2617 3
 -15 -1 1 67.7682 11.7829 1
 -15 -1 1 46.3352 11.8057 3
 15 -1 -1 60.3277 11.2435 3
 15 -1 -1 41.9794 14.4104 3
 -15 -1 1 33.9445 14.3427 3
 -15 1 1 35.9208 11.2922 3
 15 1 -1 40.8678 14.4047 3
 -15 1 1 65.122 12.8181 1
 -15 1 1 29.4936 13.7518 3
 15 1 -1 52.669 12.0547 3
 -14 -1 1 215.056 18.4927 3
 14 -1 -1 223.872 21.4516 3
 -14 -1 1 231.326 22.2204 3
 -14 -1 1 282.047 18.5164 1
 14 -1 -1 196.354 17.9674 3
 -14 1 1 275.317 19.9812 1
 -14 1 1 204.826 21.047 3
 14 1 -1 258.16 21.892 3
 14 1 -1 210.95 17.7407 3
 -14 1 1 207.268 18.1779 3
 13 -1 -1 37.7933 11.2939 3
 13 -1 -1 21.3765 9.15246 3
 -13 -1 1 19.6727 9.50275 3
 -13 -1 1 20.2188 9.15013 1
 -13 -1 1 40.5914 12.3961 3
 -13 1 1 31.8491 9.96493 1
 -13 1 1 12.5523 8.69802 3
 13 1 -1 5.74227 8.82115 3
 -13 1 1 27.0328 11.5764 3
 13 1 -1 30.3693 11.6677 3
 -12 -1 1 8.25678 8.09376 3
 12 -1 -1 23.724 8.49406 3
 -12 -1 1 23.1598 10.1632 3
 12 -1 -1 20.3752 9.97974 3
 -12 -1 1 12.3828 8.12839 1
 -12 1 1 28.4663 7.92916 3
 12 1 -1 12.846 10.2494 3
 12 1 -1 15.4614 8.26141 3
 -12 1 1 17.5724 9.69088 3
 -12 1 1 7.77455 8.66952 1
 -11 -1 1 107.818 15.9894 3
 11 -1 -1 125.243 12.2843 3
 -11 -1 1 111.352 12.3156 3
 -11 -1 1 111.977 12.6856 1
 11 -1 -1 120.073 12.8331 3
 -11 1 1 143.853 14.3114 1
 11 1 -1 118.409 13.1046 3
 11 1 -1 118.718 15.9454 3
 -11 1 1 127.342 17.9671 3
 -11 1 1 151.791 15.8756 3
 -10 -1 1 378.696 16.5596 1
 10 -1 -1 386.268 16.5552 3
 -10 -1 1 403.739 17.1958 3
 10 -1 -1 392.888 18.9631 3
 -10 -1 1 393.144 19.0823 3
 -10 1 1 378.621 18.3812 3
 -10 1 1 407.391 16.6755 3
 -10 1 1 396.584 17.5839 1
 10 1 -1 398.236 19.2082 3
 10 1 -1 401.096 17.1879 3
 -9 -1 1 114.029 13.2613 3
 9 -1 -1 116.788 12.9918 3
 -9 -1 1 115.489 11.321 3
 9 -1 -1 110.495 10.7619 3
 -9 1 1 141.265 11.5442 1
 -9 1 1 110.072 12.9191 3
 9 1 -1 121.085 13.495 3
 9 1 -1 104.707 10.8776 3
 -9 1 1 124.012 10.7703 3
 -8 -1 1 1627.49 42.3435 3
 8 -1 -1 1652.28 43.1439 3
 -8 -1 1 1686.29 43.8227 3
 8 -1 -1 1581.74 42.1244 3
 -8 1 1 1624.53 42.6625 1
 -8 1 1 1618.09 43.3374 3
 8 1 -1 1637.69 43.4411 3
 8 1 -1 1606.93 42.1721 3
 -8 1 1 1610.76 41.7993 3
 7 -1 -1 122.001 9.4672 3
 -7 -1 1 135.297 11.7779 3
 -7 -1 1 148.542 9.80928 3
 7 -1 -1 109.769 11.0927 3
 -7 1 1 144.776 10.1031 1
 7 1 -1 136.231 11.9481 3
 -7 1 1 115.935 9.07302 3
 -7 1 1 130.806 11.5223 3
 7 1 -1 132.637 9.88765 3
 -6 -1 1 1108.59 28.8784 3
 6 -1 -1 1063.76 29.6085 3
 -6 -1 1 1119.58 30.1868 3
 6 -1 -1 1028.75 28.4814 3
 -6 1 1 1115.85 29.379 1
 6 1 -1 1122.51 30.1691 3
 -6 1 1 1062.52 29.6043 3
 6 1 -1 1068.82 28.8334 3
 -6 1 1 1099.79 28.6 3
 -5 -1 1 144.311 10.3802 3
 5 -1 -1 140.606 9.63864 3
 -5 -1 1 126.721 8.27984 3
 5 -1 -1 134.872 8.08691 3
 5 1 -1 129.816 8.35105 3
 -5 1 1 134.69 8.92796 1
 -5 1 1 145.143 9.59191 3
 -5 1 1 136.009 8.10952 3
 5 1 -1 138.118 9.99519 3
 -4 -1 1 924.026 24.2968 3
 4 -1 -1 829.562 22.816 3
 -4 -1 1 887.145 23.1327 3
 4 -1 -1 866.707 23.6618 3
 4 1 -1 883.504 23.1973 3
 -4 1 1 890.361 23.7549 3
 -4 1 1 858.561 22.854 3
 4 1 -1 928.821 24.2364 3
 -4 1 1 922.598 23.655 1
 3 -1 -1 -6.1303 3.85474 1
 3 -1 -1 14.0761 3.62572 3
 -3 1 1 5.30319 3.28948 3
 -3 1 1 -3.3509 3.95591 1
 2 -1 -1 1540.14 37.8744 3
 2 -1 -1 1525.71 37.5955 3
 -2 -1 1 1660.14 38.4813 3
 2 -1 -1 1557.3 37.978 1
 -2 -1 1 1609.4 37.8359 3
 -2 1 1 1556.5 38.1396 3
 2 1 -1 1594.34 37.8602 3
 -2 1 1 1531.23 37.5772 3
 -2 1 1 1622.59 38.0063 1
 2 1 -1 1644.71 38.3749 3
 -1 -1 1 77.2481 6.32182 3
 1 -1 -1 74.9989 4.65153 3
 -1 -1 1 76.29 5.07489 3
 1 -1 -1 75.3752 4.98103 3
 1 -1 -1 79.9611 4.85211 1
 1 1 -1 81.8419 5.15175 3
 -1 1 1 78.9733 5.38286 3
 -1 1 1 80.8751 4.69803 1
 -1 1 1 74.6996 4.55583 3
 1 1 -1 79.0202 6.00709 3
 0 -1 1 5598.31 129.101 3
 0 -1 -1 5722.54 128.651 3
 0 -1 1 5530.12 128.283 2
 0 -1 1 5588.04 128.304 1
 0 -1 1 5832.37 128.713 3
 0 -1 -1 5118.39 128.955 3
 0 1 1 5446.05 129.256 3
 0 1 -1 5764.64 129.587 3
 0 1 1 5731.06 128.635 3
 0 1 -1 5679.51 128.761 3
 0 1 -1 5502.05 128.383 2
 0 1 -1 5387.38 127.973 1
 1 -1 1 182.906 6.89984 3
 -1 -1 -1 194.939 7.06629 3
 -1 -1 -1 201.183 8.2904 3
 1 -1 1 194.031 7.43386 3
 -1 1 -1 189.233 6.78134 3
 -1 1 -1 177.762 6.3395 1
 -1 1 -1 192.923 7.62625 3
 1 1 1 210.12 8.18392 3
 1 1 1 182.636 7.11746 3
 2 -1 1 8.0092 3.42222 3
 2 -1 1 11.6958 4.05319 3
 -2 -1 -1 13.9727 4.79923 3
 -2 -1 -1 8.6287 3.60075 3
 -2 1 -1 5.01261 3.29125 3
 -2 1 -1 5.36203 4.10119 3
 2 1 1 9.54913 3.67435 3
 2 1 1 10.727 4.54984 3
 3 -1 1 45.2984 6.31326 3
 -3 -1 -1 51.9885 6.71245 3
 3 1 1 79.1986 8.63115 3
 -3 1 -1 46.1243 6.4106 3
 3 1 1 54.7818 6.84163 3
 -4 -1 -1 800.193 21.7361 3
 4 -1 1 776.173 21.6086 3
 -4 -1 -1 825.205 23.0457 3
 4 -1 1 828.318 22.6045 3
 -4 1 -1 814.588 22.6727 3
 4 1 1 825.991 22.8889 3
 4 1 1 785.887 21.8791 3
 -4 1 -1 791.422 21.5989 3
 5 -1 1 1100.18 29.7731 3
 5 -1 1 1170.91 30.8112 3
 -5 -1 -1 1149.17 30.0082 3
 -5 -1 -1 1169.73 31.3612 3
 -5 1 -1 1151.87 30.709 3
 -5 1 -1 1145.61 29.8349 3
 5 1 1 1177.7 31.2042 3
 5 1 1 1137.36 30.0987 3
 -6 -1 -1 741.911 23.3976 3
 6 -1 1 760.665 22.8413 3
 -6 -1 -1 735.887 21.7625 3
 6 -1 1 704.442 21.3899 3
 -6 1 -1 731.499 21.5795 3
 -6 1 -1 738.716 22.7849 3
 6 1 1 725.727 21.7385 3
 6 1 1 771.471 23.3232 3
 -7 -1 -1 440.13 17.9445 3
 7 -1 1 404.197 15.6257 3
 -7 -1 -1 404.719 15.8249 3
 7 -1 1 426.84 17.4044 3
 -7 1 -1 419.684 15.5453 3
 7 1 1 410.135 15.7771 3
 -7 1 -1 447.289 15.8979 1
 -7 1 -1 413.279 17.0149 3
 7 1 1 446.259 17.6821 3
 8 -1 1 544.419 20.6042 3
 -8 -1 -1 554.66 19.1981 3
 -8 -1 -1 553.743 21.1185 3
 8 -1 1 537.118 19.0684 3
 -8 1 -1 509.946 20.4913 3
 8 1 1 532.455 18.8649 3
 -8 1 -1 537.861 19.0973 1
 8 1 1 558.556 20.9262 3
 -8 1 -1 529.955 18.4691 3
 9 -1 1 225.679 15.4324 3
 9 -1 1 205.688 13.0876 3
 -9 -1 -1 208.316 15.9499 3
 -9 -1 -1 230.902 13.9962 3
 -9 1 -1 212.973 14.9556 3
 -9 1 -1 221.619 13.1562 3
 -9 1 -1 220.244 13.384 1
 9 1 1 242.846 15.9735 3
 9 1 1 223.513 13.7322 3
 10 -1 1 13.6544 7.07506 3
 -10 -1 -1 12.9847 7.2811 3
 -10 -1 -1 5.90496 8.37925 3
 10 -1 1 4.50456 8.43659 3
 -10 1 -1 10.4436 8.38421 3
 10 1 1 20.2055 8.97724 3
 10 1 1 2.48207 6.73526 3
 -10 1 -1 8.15815 6.89245 3
 -10 1 -1 -3.4363 7.10199 1
 11 -1 1 135.335 16.9364 3
 -11 -1 -1 134.794 17.2259 3
 11 -1 1 137.466 13.7776 3
 -11 -1 -1 130.957 16.3215 3
 -11 1 -1 111.036 14.9209 1
 -11 1 -1 120.989 16.4946 3
 11 1 1 106.777 10.7745 3
 -11 1 -1 107.244 17.3259 3
 11 1 1 108.1 12.4896 3
 -12 -1 -1 295.619 18.2032 3
 -12 -1 -1 278.909 21.4063 3
 12 -1 1 291.772 20.6159 3
 -12 -1 -1 245.136 26.2235 1
 12 -1 1 306.628 17.8656 3
 -12 1 -1 276.872 18.4083 1
 -12 1 -1 330.845 18.0603 3
 12 1 1 284.258 18.35 3
 -12 1 -1 274.991 19.9844 3
 12 1 1 292.622 21.4246 3
 -13 -1 -1 1.46368 8.91633 1
 -13 -1 -1 -8.8818 8.85073 3
 13 -1 1 22.5279 9.96556 3
 -13 -1 -1 -5.416 11.26 3
 13 -1 1 7.06693 10.913 3
 -13 1 -1 6.28079 9.03772 3
 13 1 1 8.89518 11.1319 3
 13 1 1 14.1183 9.30003 3
 -13 1 -1 14.2337 9.07465 1
 -13 1 -1 3.41651 11.5023 3
 -14 -1 -1 26.4354 10.2698 3
 -14 -1 -1 13.7572 12.3377 3
 14 -1 1 19.9485 10.4223 3
 -14 -1 -1 -5.6497 9.36378 1
 14 -1 1 11.7667 12.4042 3
 -14 1 -1 44.2128 10.9903 1
 14 1 1 1.73079 9.5633 3
 14 1 1 24.42 12.1903 3
 -14 1 -1 23.3054 12.8961 3
 -14 1 -1 6.42788 9.44917 3
 -15 -1 -1 78.421 15.9014 3
 -15 -1 -1 64.0742 12.5566 3
 15 -1 1 64.4913 15.588 3
 -15 -1 -1 48.5048 12.3318 1
 15 -1 1 40.5518 11.9694 3
 -15 1 -1 35.5309 14.439 3
 15 1 1 67.726 12.3936 3
 15 1 1 85.1371 16.7256 3
 -15 1 -1 62.6263 12.9718 1
 -15 1 -1 45.848 11.5946 3
 16 -1 1 -12.476 11.9583 3
 -16 -1 -1 -34.617 15.182 3
 -16 -1 -1 22.0224 12.0695 3
 -16 -1 -1 18.7326 11.3786 1
 16 -1 1 -13.562 14.3997 3
 -16 1 -1 -12.755 13.5991 3
 -16 1 -1 -15.292 11.862 1
 16 1 1 -20.826 11.4768 3
 16 1 1 15.886 16.2008 3
 -16 1 -1 -8.3249 11.2801 3
 16 -2 -1 -14.475 12.6394 3
 -16 -2 1 17.8846 11.216 1
 -16 -2 1 -0.272 13.1644 3
 16 -2 -1 2.04748 14.5831 3
 -16 -2 1 29.4665 16.7278 3
 -16 2 1 9.92179 12.285 3
 -16 2 1 36.313 12.9198 1
 16 2 -1 -7.1974 15.3296 3
 -16 2 1 6.47309 15.3775 3
 16 2 -1 -1.3006 12.7524 3
 -15 -2 1 60.2071 12.2014 3
 -15 -2 1 72.956 15.3166 3
 -15 -2 1 68.2053 11.701 1
 15 -2 -1 84.2549 15.8413 3
 15 -2 -1 43.8848 11.4982 3
 -15 2 1 58.2343 14.3388 3
 -15 2 1 65.1323 12.449 3
 15 2 -1 39.3093 12.518 3
 -15 2 1 40.4922 11.8459 1
 15 2 -1 43.914 15.4451 3
 14 -2 -1 370.076 20.9795 3
 -14 -2 1 342.572 26.1998 3
 14 -2 -1 382.243 24.6078 3
 -14 -2 1 349.565 20.0807 1
 -14 -2 1 374.955 21.1484 3
 14 2 -1 354.824 25.362 3
 -14 2 1 383.321 21.1406 3
 -14 2 1 361.548 21.9628 1
 -14 2 1 341.917 24.0273 3
 14 2 -1 353.686 21.7586 3
 -13 -2 1 30.4238 10.1079 3
 13 -2 -1 28.7891 9.89097 3
 -13 -2 1 32.9273 9.21045 1
 -13 -2 1 7.90134 12.5183 3
 13 -2 -1 41.8521 11.9595 3
 -13 2 1 29.8102 9.42402 3
 13 2 -1 43.815 12.6004 3
 -13 2 1 22.0245 11.7181 3
 -13 2 1 29.3916 9.52352 1
 13 2 -1 37.7377 10.4038 3
 -12 -2 1 124.832 13.5374 1
 -12 -2 1 132.902 15.2079 3
 12 -2 -1 132.261 15.0241 3
 12 -2 -1 132.044 17.2781 3
 -12 -2 1 129.538 15.8314 3
 -12 2 1 105.756 15.4218 1
 -12 2 1 113.315 13.079 3
 12 2 -1 120.642 14.7413 3
 12 2 -1 147.649 18.4431 3
 -12 2 1 152.191 14.9333 3
 -11 -2 1 40.0092 10.8302 3
 11 -2 -1 30.2011 12.8239 3
 11 -2 -1 36.9163 10.1599 3
 -11 -2 1 36.0557 9.27056 3
 -11 -2 1 35.3108 8.15384 1
 11 2 -1 41.0719 9.55076 3
 -11 2 1 41.1127 10.3722 3
 -11 2 1 42.0744 8.36268 3
 11 2 -1 24.0123 10.0722 3
 -11 2 1 32.1582 9.25798 1
 -10 -2 1 15.5332 9.67804 3
 10 -2 -1 20.0051 8.59736 3
 -10 -2 1 15.9177 7.51107 3
 10 -2 -1 9.56528 7.19778 3
 10 2 -1 13.16 9.18432 3
 -10 2 1 12.7992 6.82775 3
 -10 2 1 12.1678 7.55093 1
 10 2 -1 15.3857 7.49579 3
 -10 2 1 21.8289 8.96875 3
 9 -2 -1 124.491 11.2082 3
 -9 -2 1 112.611 11.6548 3
 9 -2 -1 118.198 13.3555 3
 -9 -2 1 107.361 14.5011 3
 -9 2 1 124.462 13.5077 3
 9 2 -1 101.582 11.5665 3
 9 2 -1 133.432 14.6406 3
 -9 2 1 108.886 10.8158 3
 -9 2 1 104.358 11.9155 1
 8 -2 -1 32.6052 6.26317 3
 8 -2 -1 40.5484 7.79161 3
 -8 -2 1 35.5983 6.67876 3
 -8 -2 1 35.0441 8.27544 3
 8 2 -1 23.4507 6.39343 3
 -8 2 1 32.6577 7.49173 3
 -8 2 1 38.6854 6.40133 3
 8 2 -1 39.016 8.08073 3
 -8 2 1 16.987 6.45249 1
 7 -2 -1 659.165 20.6038 3
 -7 -2 1 698.491 22.8894 3
 7 -2 -1 690.547 21.8956 3
 -7 -2 1 679.569 20.7145 3
 7 2 -1 669.602 20.968 3
 -7 2 1 658.944 21.878 3
 -7 2 1 697.018 21.6513 1
 7 2 -1 660.445 22.4482 3
 -7 2 1 675.922 20.5385 3
 -6 -2 1 133.378 11.7526 3
 6 -2 -1 111.865 9.14853 3
 6 -2 -1 123.377 10.6582 3
 -6 -2 1 124.068 9.42014 3
 6 2 -1 103.998 9.4187 3
 6 2 -1 128.541 12.0994 3
 -6 2 1 96.7895 9.46297 1
 -6 2 1 106.492 8.87024 3
 -6 2 1 95.886 10.1199 3
 5 -2 -1 1058.37 28.2229 3
 -5 -2 1 1058.18 29.9454 3
 5 -2 -1 1076.18 28.9141 3
 -5 -2 1 1077.37 28.5047 3
 5 2 -1 1060.61 28.6336 3
 5 2 -1 1100.71 29.8364 3
 -5 2 1 1103.8 28.9856 1
 -5 2 1 1057.91 28.1024 3
 -5 2 1 1070.06 29.0726 3
 4 -2 -1 25.312 5.19914 1
 4 -2 -1 34.2226 4.99938 3
 4 2 -1 38.3671 5.27078 3
 -4 2 1 34.4858 4.8533 3
 -4 2 1 29.7638 5.15889 1
 -3 -2 1 186.46 11.0562 3
 3 -2 -1 147.797 9.42774 3
 3 -2 -1 141.779 8.35653 1
 -3 -2 1 150.686 8.62936 3
 3 -2 -1 147.818 8.27062 3
 -3 2 1 156.498 9.4723 3
 -3 2 1 150.773 8.26309 3
 -3 2 1 167.313 8.48237 1
 3 2 -1 158.598 8.90483 3
 -2 -2 1 2198.83 51.2213 3
 2 -2 -1 2000.27 50.7188 3
 2 -2 -1 1948.97 50.6309 1
 2 -2 -1 2118.02 51.3135 3
 2 2 -1 2463.57 52.4331 3
 -2 2 1 2033.9 50.7385 3
 2 2 -1 2220.1 51.3763 3
 -2 2 1 2043.19 50.6801 1
 -2 2 1 2152.41 51.4123 3
 1 -2 -1 1094.35 27.1249 1
 1 -2 -1 1109.47 27.6011 3
 -1 -2 1 1132.14 28.084 3
 1 -2 -1 1075.5 27.9351 3
 -1 -2 1 1111.38 25.8819 1
 1 2 -1 1089.62 28.0633 3
 1 2 -1 1091.38 26.7456 2
 -1 2 1 1127.88 27.14 1
 -1 2 1 1128.29 27.5002 3
 1 2 -1 1084.09 28.884 3
 -1 2 1 1083.98 28.0885 3
 0 -2 -1 71.2768 6.34075 3
 0 -2 1 46.5064 4.23625 1
 0 -2 1 67.5492 4.83684 2
 0 -2 -1 53.1623 4.98684 1
 0 2 -1 60.0216 4.92598 2
 0 2 -1 50.6395 4.19817 1
 -1 -2 -1 3132.57 74.8718 3
 -1 -2 -1 3156.07 74.0449 3
 1 -2 1 3121.87 72.6979 2
 1 -2 1 3055.94 73.0578 1
 1 -2 1 3132.88 74.1966 3
 1 -2 1 3151.14 73.79 3
 1 2 1 3230.46 74.9074 3
 1 2 1 3092.54 74.0669 3
 -1 2 -1 3137.25 73.0546 1
 -1 2 -1 3139.26 74.2662 3
 -1 2 -1 3234.92 73.8551 3
 2 -2 1 6.12784 4.68602 3
 2 -2 1 0.36081 4.02732 3
 -2 -2 -1 9.53988 4.14386 3
 -2 2 -1 4.00429 3.98515 3
 2 2 1 7.14077 4.25454 3
 -2 2 -1 0.80442 3.4776 1
 -2 2 -1 16.3277 4.85195 3
 3 -2 1 943.506 25.8059 3
 -3 -2 -1 1005.85 27.4761 3
 3 -2 1 984.041 26.5153 3
 -3 -2 -1 1014.69 26.2415 3
 -3 2 -1 988.309 25.9036 3
 3 2 1 987.996 26.222 3
 -3 2 -1 975.973 25.778 1
 3 2 1 1052.72 27.6697 3
 -3 2 -1 988.607 26.812 3
 -4 -2 -1 6.51732 5.86832 3
 -4 -2 -1 1.56662 4.37231 3
 4 -2 1 6.02509 4.29242 3
 4 -2 1 3.25905 4.9435 3
 -4 2 -1 -3.3257 4.31436 1
 -4 2 -1 4.45286 5.15422 3
 4 2 1 4.32163 4.55922 3
 -4 2 -1 1.66508 4.16576 3
 4 2 1 6.2314 5.95044 3
 5 -2 1 1490.78 39.5287 3
 -5 -2 -1 1632.29 40.1812 3
 -5 -2 -1 1547.27 41.2956 3
 5 -2 1 1577.67 40.5198 3
 -5 2 -1 1623.5 40.249 1
 5 2 1 1577.99 41.2326 3
 -5 2 -1 1590.74 39.8047 3
 -5 2 -1 1517.27 40.3658 3
 5 2 1 1580.21 40.1551 3
 -6 -2 -1 111.759 9.7951 3
 6 -2 1 110.205 9.71634 3
 -6 -2 -1 124.74 12.3422 3
 6 -2 1 117.68 11.5498 3
 -6 2 -1 105.463 9.82952 1
 6 2 1 128.458 11.844 3
 6 2 1 111.291 9.95472 3
 -6 2 -1 112.603 9.43142 3
 -6 2 -1 125.14 11.1841 3
 -7 -2 -1 213.738 14.785 3
 7 -2 1 248.151 14.0157 3
 -7 -2 -1 230.776 12.3454 3
 7 -2 1 224.504 12.1905 3
 -7 2 -1 204.714 13.7822 3
 7 2 1 222.655 12.4016 3
 -7 2 -1 229.424 12.4917 1
 -7 2 -1 233.148 12.164 3
 7 2 1 237.736 14.6407 3
 -8 -2 -1 533.076 19.0971 3
 8 -2 1 554.223 20.8051 3
 8 -2 1 525.543 19.0636 3
 -8 -2 -1 534.331 21.8338 3
 -8 2 -1 522.381 19.2433 1
 8 2 1 526.33 19.1597 3
 -8 2 -1 523.893 20.5759 3
 -8 2 -1 534.573 18.8666 3
 8 2 1 542.847 21.3612 3
 9 -2 1 435.576 19.696 3
 -9 -2 -1 420.787 17.9279 3
 -9 -2 -1 405.253 20.4096 3
 9 -2 1 420.614 17.7486 3
 9 2 1 413.369 17.9516 3
 -9 2 -1 430.173 17.9755 1
 -9 2 -1 433.307 17.5522 3
 9 2 1 443.73 20.6191 3
 -9 2 -1 441.742 19.386 3
 10 -2 1 107.634 12.3437 3
 10 -2 1 96.4768 10.2339 3
 -10 -2 -1 105.898 12.542 3
 -10 -2 -1 93.1344 10.1214 3
 -10 2 -1 99.2053 12.5499 3
 -10 2 -1 117.477 12.8086 1
 -10 2 -1 102.323 11.5379 3
 10 2 1 98.9025 11.9838 3
 10 2 1 93.7773 12.9242 3
 -11 -2 -1 176.972 15.7339 3
 11 -2 1 139.971 19.1246 3
 -11 -2 -1 161.913 18.6732 3
 11 -2 1 146.782 17.9323 3
 -11 2 -1 180.986 15.2028 1
 -11 2 -1 154.85 17.2924 3
 -11 2 -1 159.887 14.6669 3
 11 2 1 155.142 18.766 3
 11 2 1 152.231 15.1513 3
 12 -2 1 30.8109 9.81055 3
 12 -2 1 51.5383 12.2752 3
 -12 -2 -1 43.2386 10.4642 3
 -12 -2 -1 43.691 12.5423 3
 -12 2 -1 46.9278 12.0634 3
 12 2 1 43.0241 12.0592 3
 -12 2 -1 49.0745 9.76444 3
 -12 2 -1 56.5608 10.6537 1
 12 2 1 34.7089 9.84757 3
 -13 -2 -1 24.8035 10.6309 3
 13 -2 1 13.4609 11.9649 3
 -13 -2 -1 8.95264 12.8024 3
 -13 -2 -1 4.74641 8.88031 1
 13 -2 1 19.2109 9.22931 3
 -13 2 -1 27.8679 10.0864 1
 13 2 1 19.1635 12.3647 3
 13 2 1 18.1715 9.82701 3
 -13 2 -1 -1.2895 11.7268 3
 -13 2 -1 3.4319 8.94014 3
 -14 -2 -1 161.588 17.7642 1
 14 -2 1 213.914 23.1952 3
 14 -2 1 157.58 19.0838 3
 -14 -2 -1 186.954 19.1375 3
 -14 -2 -1 183.9 18.9848 3
 14 2 1 171.388 23.8786 3
 -14 2 -1 173.613 18.9076 1
 -14 2 -1 168.066 21.9509 3
 -14 2 -1 169.471 18.3568 3
 14 2 1 202.515 19.0865 3
 15 -2 1 44.9249 11.9575 3
 15 -2 1 66.0985 15.8439 3
 -15 -2 -1 8.51322 10.6244 1
 -15 -2 -1 43.035 12.3219 3
 -15 -2 -1 26.9257 15.4929 3
 -15 2 -1 23.6669 14.6371 3
 -15 2 -1 40.1826 12.3299 1
 15 2 1 33.3502 15.8667 3
 15 2 1 21.796 11.8611 3
 -15 2 -1 20.1645 11.399 3
 16 -2 1 13.5739 13.6071 3
 -16 -2 -1 33.317 14.5374 3
 -16 -2 -1 21.6561 18.0737 3
 16 -2 1 18.0389 14.9279 3
 -16 -2 -1 -10.951 11.2982 1
 -16 2 -1 3.77925 12.2299 1
 -16 2 -1 -4.8292 16.8403 3
 16 2 1 -22.983 12.4295 3
 -16 2 -1 9.49462 13.3712 3
 16 2 1 4.14508 15.6245 3
 -16 -3 1 24.1182 11.4547 1
 16 -3 -1 41.8891 14.7544 3
 16 -3 -1 32.8724 16.8455 3
 -16 -3 1 5.59197 15.3615 3
 -16 -3 1 17.191 15.8922 3
 16 3 -1 10.1219 13.8005 3
 -16 3 1 15.5226 16.264 3
 -16 3 1 -9.1377 14.2415 1
 16 3 -1 3.84664 17.3561 3
 -16 3 1 18.0218 15.7455 3
 15 -3 -1 -4.839 11.4787 3
 -15 -3 1 20.0172 12.7151 3
 -15 -3 1 -11.523 15.1003 3
 -15 -3 1 11.3564 9.70634 1
 15 -3 -1 34.4358 14.5391 3
 -15 3 1 0.13948 14.799 3
 -15 3 1 12.44 12.0773 1
 -15 3 1 6.90631 11.5059 3
 15 3 -1 -0.3213 11.6137 3
 15 3 -1 -3.1233 15.6069 3
 -14 -3 1 44.4101 12.0287 3
 -14 -3 1 22.7079 15.2021 3
 14 -3 -1 58.364 14.1123 3
 -14 -3 1 44.1358 10.7814 1
 14 -3 -1 32.3322 12.0694 3
 14 3 -1 34.5164 11.7205 3
 14 3 -1 9.39685 15.0178 3
 -14 3 1 30.2969 11.7903 1
 -14 3 1 44.5938 11.35 3
 -14 3 1 31.856 13.7825 3
 -13 -3 1 149.024 18.7419 3
 13 -3 -1 196.258 18.7102 3
 -13 -3 1 174.058 22.7459 3
 13 -3 -1 234.795 20.4307 3
 13 3 -1 179.992 18.1995 3
 -13 3 1 204.399 17.9128 3
 -13 3 1 191.361 22.4519 3
 13 3 -1 194.729 21.706 3
 -13 3 1 171.862 18.0555 1
 12 -3 -1 38.1471 11.1781 3
 -12 -3 1 40.194 8.69668 1
 12 -3 -1 43.8411 10.7642 3
 -12 -3 1 52.2643 10.3206 3
 -12 -3 1 49.4647 13.3319 3
 -12 3 1 28.0715 10.0169 1
 -12 3 1 43.7487 12.8899 3
 12 3 -1 36.1742 10.2229 3
 12 3 -1 66.9016 12.7913 3
 -12 3 1 39.6866 9.7399 3
 -11 -3 1 -4.2186 8.00762 3
 11 -3 -1 -2.6344 7.70761 3
 -11 -3 1 -7.4209 10.3414 3
 11 -3 -1 12.1243 9.11411 3
 11 3 -1 14.7249 10.5371 3
 -11 3 1 -8.3866 7.47465 1
 11 3 -1 0.24586 7.82106 3
 -11 3 1 19.5515 10.5379 3
 -11 3 1 -5.0774 7.66916 3
 -10 -3 1 133.382 17.67 3
 10 -3 -1 138.604 15.7348 3
 10 -3 -1 167.105 14.4936 3
 -10 -3 1 163.216 17.2636 3
 -10 3 1 154.963 14.856 3
 10 3 -1 173.724 14.4297 3
 -10 3 1 128.252 15.8929 3
 10 3 -1 147.782 17.549 3
 -10 3 1 145.049 19.8803 1
 9 -3 -1 51.1142 8.01277 3
 9 -3 -1 53.6604 8.96843 3
 -9 -3 1 50.697 8.21911 3
 -9 -3 1 63.6178 10.1038 3
 -9 3 1 54.1654 9.58763 3
 -9 3 1 60.2643 8.76063 1
 9 3 -1 46.4868 8.21918 3
 -9 3 1 54.6071 8.1897 3
 9 3 -1 64.4237 10.3552 3
 8 -3 -1 17.5335 7.17862 3
 8 -3 -1 12.0183 6.26761 3
 -8 -3 1 8.62125 8.10878 3
 -8 -3 1 11.8966 6.2016 3
 -8 3 1 8.45557 6.00202 3
 -8 3 1 6.08225 6.41533 1
 8 3 -1 9.12969 6.18039 3
 -8 3 1 9.13576 7.33651 3
 8 3 -1 15.6046 8.81771 3
 -7 -3 1 122.894 14.0006 3
 7 -3 -1 116.906 10.5028 3
 7 -3 -1 112.669 11.5011 3
 -7 -3 1 116.11 10.7884 3
 -7 3 1 142.026 12.4706 3
 -7 3 1 94.7651 10.8431 1
 -7 3 1 105.571 10.2528 3
 7 3 -1 99.3964 10.9416 3
 7 3 -1 130.472 13.593 3
 -6 -3 1 0.1916 5.03608 3
 6 -3 -1 6.3122 6.29512 3
 -6 -3 1 -3.6849 6.73613 3
 6 -3 -1 -1.1535 5.24625 3
 -6 3 1 -0.5826 5.11893 3
 -6 3 1 2.73499 6.05566 3
 6 3 -1 2.7649 5.22246 3
 6 3 -1 -2.8547 7.16204 3
 -6 3 1 -0.0245 5.55077 1
 -5 -3 1 80.961 9.20881 3
 5 -3 -1 59.8663 6.54798 3
 -5 3 1 48.229 6.70293 1
 -5 3 1 65.4205 8.93096 3
 5 3 -1 59.3808 6.85287 3
 -4 -3 1 686.18 22.9287 3
 4 -3 -1 684.715 20.5844 1
 -4 -3 1 691.788 20.8646 3
 4 -3 -1 679.588 20.4153 3
 4 -3 -1 702.654 21.3058 3
 4 3 -1 727.187 22.8807 3
 -4 3 1 696.542 20.5041 1
 -4 3 1 681.674 21.4337 3
 4 3 -1 682.568 21.1111 3
 -4 3 1 705.564 20.3163 3
 3 -3 -1 317.055 13.2393 3
 3 -3 -1 309.99 12.4077 3
 -3 -3 1 311.581 15.0219 3
 -3 -3 1 326.949 13.0261 3
 3 -3 -1 304.636 12.1856 1
 -3 3 1 306.642 12.3522 3
 -3 3 1 312.383 11.9839 1
 -3 3 1 334.935 13.6392 3
 3 3 -1 311.95 13.2792 3
 3 3 -1 351.717 15.1969 3
 -2 -3 1 19.8773 6.47822 3
 2 -3 -1 21.0451 5.56692 3
 2 -3 -1 19.3485 4.83898 3
 2 -3 -1 16.1566 4.27007 1
 -2 -3 1 20.9895 5.26078 3
 2 3 -1 21.1055 6.49063 3
 -2 3 1 28.6859 5.73765 3
 -2 3 1 11.6208 4.60956 3
 -2 3 1 13.4225 4.26718 1
 2 3 -1 19.0205 5.18303 3
 -1 -3 1 1106.58 28.8576 3
 1 -3 -1 1099.46 28.812 3
 -1 -3 1 1089.6 28.2649 3
 -1 -3 1 1051.06 25.9508 1
 1 -3 -1 1070.6 28.1428 3
 1 -3 -1 1067.18 27.2355 1
 1 3 -1 1015.81 26.5034 2
 -1 3 1 1108.42 30.1205 3
 1 3 -1 1119.78 30.1472 3
 1 3 -1 1104.27 28.8558 3
 -1 3 1 1089.04 28.9754 3
 -1 3 1 1016.41 26.9549 1
 0 -3 -1 14.3596 4.94351 3
 0 -3 -1 0.5886 3.50535 1
 0 -3 -1 0.0995 4.29207 3
 0 -3 1 4.73623 4.27869 3
 0 -3 1 -2.3893 2.87779 1
 0 -3 1 0.68038 4.82679 3
 0 3 -1 0.83623 6.16911 3
 0 3 -1 4.75781 5.03379 3
 0 3 -1 4.2354 3.26905 2
 0 3 1 5.48665 5.87581 3
 0 3 1 -0.4334 2.5988 2
 0 3 1 16.63 5.10891 3
 1 -3 1 183.415 7.36552 2
 1 -3 1 200.994 10.6383 3
 1 -3 1 171.811 9.68952 3
 -1 -3 -1 216.65 10.5147 3
 -1 -3 -1 208.379 12.8057 3
 1 -3 1 168.785 7.88585 1
 -1 3 -1 178.29 9.56434 3
 1 3 1 217.862 10.8287 3
 1 3 1 227.329 12.431 3
 -1 3 -1 173.878 7.89938 1
 -1 3 -1 215.93 11.071 3
 2 -3 1 64.4372 6.8379 1
 2 -3 1 55.4999 6.14395 3
 2 -3 1 51.9604 6.51804 3
 -2 -3 -1 55.1394 7.90487 3
 -2 -3 -1 51.6989 6.0357 3
 2 -3 1 57.6336 5.65508 2
 -2 3 -1 48.2579 6.5674 3
 -2 3 -1 58.7289 5.97807 3
 2 3 1 50.1304 6.40694 3
 2 3 1 44.9824 7.06886 3
 -2 3 -1 57.3314 6.57755 1
 -3 -3 -1 47.9802 6.16624 3
 3 -3 1 44.9318 5.59183 3
 3 -3 1 51.4852 6.47412 3
 -3 -3 -1 52.6765 8.08292 3
 -3 3 -1 49.1099 5.80633 3
 3 3 1 44.0468 7.52739 3
 -3 3 -1 48.1261 6.77284 3
 3 3 1 51.1783 6.51318 3
 -3 3 -1 55.3265 7.39263 1
 -4 -3 -1 1589.09 43.3243 3
 4 -3 1 1628.79 41.434 3
 4 -3 1 1583.12 42.1685 3
 -4 -3 -1 1627.46 41.7104 3
 -4 3 -1 1672.57 41.4129 3
 4 3 1 1662.87 43.4085 3
 -4 3 -1 1602.32 42.3019 3
 -4 3 -1 1665.75 41.2293 1
 4 3 1 1623.93 41.904 3
 -5 -3 -1 45.0828 6.49943 3
 5 -3 1 54.3293 7.30913 3
 -5 -3 -1 57.1472 8.50889 3
 5 -3 1 38.7451 6.18713 3
 -5 3 -1 38.318 6.12213 3
 -5 3 -1 40.5411 6.41702 1
 5 3 1 45.0528 6.74525 3
 5 3 1 43.3504 8.31433 3
 -5 3 -1 41.9388 7.00865 3
 6 -3 1 507.114 17.7676 3
 -6 -3 -1 489.235 20.1585 3
 -6 -3 -1 510.044 17.9094 3
 6 -3 1 515.692 18.8369 3
 -6 3 -1 485.354 18.6329 3
 -6 3 -1 508.863 17.481 3
 -6 3 -1 504.327 17.9352 1
 6 3 1 514.341 20.0269 3
 6 3 1 495.671 18.225 3
 7 -3 1 16.682 7.11097 3
 7 -3 1 13.3945 5.9688 3
 -7 -3 -1 12.2415 6.20637 3
 -7 -3 -1 25.6708 7.84503 3
 7 3 1 14.4261 7.94898 3
 -7 3 -1 18.8962 7.41657 3
 -7 3 -1 7.27294 6.2313 1
 -7 3 -1 14.379 6.21979 3
 7 3 1 3.18276 5.91957 3
 -8 -3 -1 67.2294 10.221 3
 8 -3 1 82.9387 11.398 3
 -8 -3 -1 61.6654 8.46089 3
 8 -3 1 74.768 9.55183 3
 8 3 1 54.1958 8.36201 3
 -8 3 -1 73.8017 9.63734 3
 -8 3 -1 62.075 8.57879 1
 8 3 1 82.0678 11.238 3
 -8 3 -1 80.9364 10.8751 3
 9 -3 1 13.0177 7.18783 3
 -9 -3 -1 23.7758 10.1032 3
 9 -3 1 24.9056 8.54737 3
 -9 -3 -1 12.045 7.69931 3
 -9 3 -1 22.6761 8.78977 3
 -9 3 -1 14.7888 7.23424 3
 9 3 1 22.8944 7.64574 3
 -9 3 -1 22.5541 7.9111 1
 9 3 1 25.7892 9.96983 3
 -10 -3 -1 61.5187 14.386 3
 10 -3 1 55.7173 10.8488 3
 10 -3 1 63.3553 9.68578 3
 -10 -3 -1 62.774 12.4505 3
 10 3 1 65.6705 11.2099 3
 -10 3 -1 43.0305 10.7273 3
 -10 3 -1 54.0904 10.5731 3
 10 3 1 61.06 9.90975 3
 -10 3 -1 28.7392 13.4125 1
 11 -3 1 106.236 11.7336 3
 -11 -3 -1 103.285 14.7704 3
 11 -3 1 123.201 13.667 3
 -11 -3 -1 114.215 14.9808 3
 -11 3 -1 108.995 13.4576 3
 -11 3 -1 106.274 15.4112 1
 -11 3 -1 90.7968 11.3521 3
 11 3 1 111.828 14.5821 3
 11 3 1 99.6888 11.8363 3
 -12 -3 -1 -8.0385 9.00005 3
 -12 -3 -1 -4.9077 11.9135 3
 12 -3 1 0.77982 9.5967 3
 12 -3 1 1.89277 10.6345 3
 12 3 1 -4.8027 8.89411 3
 -12 3 -1 -14.91 8.89135 3
 -12 3 -1 7.05373 11.7228 3
 -12 3 -1 8.69688 9.61549 1
 12 3 1 -2.3987 11.3164 3
 -13 -3 -1 92.104 13.8956 3
 -13 -3 -1 110.31 16.6484 3
 13 -3 1 95.4705 13.2701 3
 13 -3 1 112.291 14.7636 3
 -13 3 -1 103.781 12.9036 3
 -13 3 -1 86.442 11.8455 1
 13 3 1 111.368 16.1237 3
 13 3 1 108.953 13.736 3
 -13 3 -1 106.016 15.9931 3
 14 -3 1 23.91 11.756 3
 14 -3 1 14.6121 13.1526 3
 -14 -3 -1 2.54191 12.2402 3
 -14 -3 -1 -5.755 13.8476 3
 -14 3 -1 13.351 9.82798 1
 -14 3 -1 -1.764 13.303 3
 14 3 1 -14.098 14.5255 3
 -14 3 -1 -11.401 10.3815 3
 14 3 1 4.99733 10.6794 3
 -15 -3 -1 47.5525 17.7738 3
 15 -3 1 48.5181 12.7994 3
 15 -3 1 79.289 16.6067 3
 -15 -3 -1 17.9289 11.097 1
 -15 -3 -1 22.7054 13.4301 3
 -15 3 -1 35.1352 12.7165 3
 -15 3 -1 39.03 16.9851 3
 15 3 1 38.2004 12.8323 3
 15 3 1 75.4248 18.4715 3
 -15 3 -1 44.9311 12.6666 1
 15 -4 -1 22.3453 16.7163 3
 -15 -4 1 64.5433 18.676 3
 15 -4 -1 71.9909 16.7442 3
 -15 -4 1 41.9811 16.6758 3
 15 4 -1 69.3283 17.9833 3
 -15 4 1 68.9059 16.1856 1
 -15 4 1 59.6218 19.1756 3
 -15 4 1 37.1058 13.9182 3
 15 4 -1 48.3411 14.5514 3
 -14 -4 1 35.8368 16.2818 3
 -14 -4 1 35.879 9.73918 1
 14 -4 -1 17.6643 13.0602 3
 14 -4 -1 4.22303 14.8226 3
 -14 -4 1 46.9043 13.2363 3
 14 4 -1 34.4819 12.4029 3
 14 4 -1 70.7183 16.6917 3
 -14 4 1 42.6005 12.4986 3
 -14 4 1 31.0551 13.4143 1
 -14 4 1 19.8766 15.0314 3
 -13 -4 1 87.7218 15.8963 3
 -13 -4 1 99.1583 13.2133 3
 13 -4 -1 42.4119 14.0345 3
 -13 -4 1 67.6721 9.97077 1
 13 -4 -1 94.5644 13.74 3
 -13 4 1 99.8777 15.2333 3
 13 4 -1 76.7075 13.1162 3
 13 4 -1 74.1767 15.9771 3
 -13 4 1 93.3248 12.839 3
 -13 4 1 85.9173 13.3462 1
 12 -4 -1 88.375 12.3307 3
 -12 -4 1 96.8144 10.3251 1
 12 -4 -1 90.7798 13.5473 3
 -12 -4 1 96.7073 15.0525 3
 -12 -4 1 81.0198 12.0541 3
 12 4 -1 69.4084 12.2797 3
 -12 4 1 90.769 11.851 3
 -12 4 1 121.828 17.6165 1
 -12 4 1 98.9808 14.9805 3
 12 4 -1 122.99 15.4279 3
 -11 -4 1 165.442 21.5341 3
 11 -4 -1 180.313 18.597 3
 11 -4 -1 163.958 16.5634 3
 -11 -4 1 171.373 17.291 3
 -11 4 1 211.278 18.1357 1
 11 4 -1 159.706 17.0271 3
 -11 4 1 215.659 19.7081 3
 11 4 -1 202.738 21.5133 3
 -11 4 1 179.361 16.3713 3
 -10 -4 1 297.485 22.002 3
 10 -4 -1 291.319 17.7352 3
 10 -4 -1 344.834 19.4632 3
 -10 -4 1 330.026 18.2224 3
 10 4 -1 319.164 22.2281 3
 -10 4 1 321.191 18.9033 1
 -10 4 1 274.637 19.891 3
 -10 4 1 272.993 17.1993 3
 10 4 -1 280.081 18.1822 3
 -9 -4 1 166.141 18.3394 3
 9 -4 -1 155.961 16.0752 3
 9 -4 -1 175.024 14.3838 3
 -9 -4 1 158.258 20.9571 3
 -9 4 1 151.314 15.043 1
 9 4 -1 151.294 14.6445 3
 -9 4 1 157.732 16.5073 3
 9 4 -1 150.765 18.4769 3
 -9 4 1 176.399 13.9364 3
 8 -4 -1 66.8957 10.1804 3
 -8 -4 1 74.4125 11.5879 3
 -8 -4 1 66.1903 8.8298 3
 8 -4 -1 54.3139 8.6773 3
 8 4 -1 59.4232 9.14414 3
 -8 4 1 69.4826 8.68015 3
 -8 4 1 49.0346 9.05258 1
 8 4 -1 85.1901 11.9712 3
 -8 4 1 62.8754 9.42402 3
 -7 -4 1 376.737 20.0034 3
 -7 -4 1 418.148 17.3144 3
 7 -4 -1 390.159 16.8449 3
 7 -4 -1 407.368 18.384 3
 7 4 -1 369.844 19.9632 3
 -7 4 1 406.976 16.8348 3
 -7 4 1 393.613 17.8929 3
 -7 4 1 430.621 17.7178 1
 7 4 -1 407.987 17.6757 3
 -6 -4 1 140.208 11.993 3
 6 -4 -1 139.793 12.6413 3
 -6 -4 1 131.929 15.0523 3
 6 -4 -1 154.613 11.6433 3
 -6 4 1 137.223 12.4857 3
 -6 4 1 138.086 11.1527 3
 6 4 -1 146.035 12.4882 3
 6 4 -1 135.576 14.652 3
 -6 4 1 139.94 11.4162 1
 5 -4 -1 217.943 12.5095 3
 5 -4 -1 225.399 13.5109 3
 5 -4 -1 211.227 12.3538 1
 -5 -4 1 225.113 12.8235 3
 -5 -4 1 233.847 16.3177 3
 -5 4 1 214.616 13.7367 3
 5 4 -1 242.134 15.7957 3
 5 4 -1 228.972 13.6202 3
 -5 4 1 210.138 12.1806 3
 -5 4 1 216.089 12.0698 1
 4 -4 -1 3.06209 5.37152 1
 4 -4 -1 -0.273 3.64666 2
 -4 -4 1 -3.0704 7.28553 3
 -4 -4 1 5.24151 5.8389 3
 4 -4 -1 -6.6889 5.22818 3
 4 -4 -1 -5.1873 6.02493 3
 -4 4 1 0.92744 6.19136 3
 4 4 -1 10.2487 7.4996 3
 -4 4 1 -0.9268 5.08099 1
 -4 4 1 -7.2292 5.28043 3
 4 4 -1 -2.6318 5.77361 3
 -3 -4 1 572.386 21.4792 3
 3 -4 -1 525.703 18.0097 3
 3 -4 -1 509.336 17.0912 1
 3 -4 -1 526.848 18.7959 3
 -3 -4 1 530.156 18.5393 3
 3 4 -1 536.745 19.1617 3
 -3 4 1 521.212 17.8119 3
 3 4 -1 574.113 21.2123 3
 -3 4 1 532.403 19.3114 3
 -3 4 1 526.263 16.9384 1
 2 -4 -1 24.9563 6.50154 3
 -2 -4 1 18.1372 5.89805 3
 -2 -4 1 24.7856 5.98369 3
 -2 -4 1 22.3729 3.58645 1
 2 -4 -1 23.3317 5.94305 3
 2 -4 -1 23.9358 5.16816 1
 2 4 -1 19.1513 6.18857 3
 -2 4 1 22.4348 4.83715 1
 2 4 -1 29.3271 7.70068 3
 -2 4 1 21.2024 6.35853 3
 2 4 -1 27.4193 4.5733 2
 1 -4 -1 1471.78 36.5006 1
 1 -4 -1 1480.82 37.8794 3
 -1 -4 1 1472.74 38.4888 3
 1 -4 -1 1447.67 38.5269 3
 -1 -4 1 1468.01 37.882 3
 -1 -4 1 1449.4 35.1352 1
 1 4 -1 1402.15 35.5278 2
 -1 4 1 1420.68 38.5327 3
 1 4 -1 1456.43 38.7428 3
 -1 4 1 1459.2 40.1558 3
 1 4 -1 1506.41 40.2626 3
 0 -4 1 44.7713 4.55706 1
 0 -4 -1 39.7275 6.72988 3
 0 -4 1 39.3882 6.45751 3
 0 -4 -1 40.6089 4.87918 1
 0 -4 -1 37.0204 6.26133 3
 0 -4 1 41.1706 6.77629 3
 0 4 1 40.5451 3.90727 2
 0 4 1 48.9987 7.21644 3
 0 4 -1 31.1772 6.6129 3
 0 4 -1 34.9824 4.66854 2
 0 4 -1 46.691 8.53708 3
 0 4 1 48.2242 8.5502 3
 -1 -4 -1 2079.95 50.8298 1
 -1 -4 -1 2108.69 52.8861 3
 1 -4 1 2165.36 51.2794 1
 -1 -4 -1 2151.6 53.5066 3
 1 -4 1 2140.59 53.0158 3
 1 -4 1 2171.5 50.4179 2
 1 -4 1 2166.63 53.8243 3
 -1 4 -1 2126.41 53.8495 3
 1 4 1 2102.49 50.2498 2
 1 4 1 2166.91 54.999 3
 1 4 1 2078.58 53.5141 3
 -1 4 -1 2087.02 51.0095 1
 2 -4 1 55.086 7.47368 3
 2 -4 1 54.7913 6.68447 3
 2 -4 1 57.8892 7.55402 1
 -2 -4 -1 69.9613 9.63081 3
 2 -4 1 58.2918 6.00251 2
 -2 -4 -1 66.2312 7.59276 3
 -2 4 -1 61.4943 7.9204 3
 -2 4 -1 65.5511 9.10684 3
 2 4 1 62.2099 7.71892 3
 2 4 1 55.1362 8.89239 3
 -2 4 -1 52.0184 7.16549 1
 3 -4 1 825.791 25.6257 3
 3 -4 1 851.1 22.0346 2
 3 -4 1 831.15 24.8026 3
 -3 -4 -1 874.698 25.4809 3
 3 4 1 845.294 25.7473 3
 -3 4 -1 849.498 24.7554 3
 3 4 1 848.234 27.4217 3
 -3 4 -1 855.108 23.6668 1
 -3 4 -1 848.222 26.0609 3
 -4 -4 -1 -2.0636 7.22787 3
 4 -4 1 -3.2631 5.39342 3
 4 -4 1 -5.182 5.90836 3
 4 -4 1 -1.3392 4.13048 2
 -4 -4 -1 1.12837 5.55065 3
 -4 4 -1 2.64917 5.47338 3
 4 4 1 10.8699 8.06272 3
 4 4 1 5.63343 6.19907 3
 -4 4 -1 -5.3542 5.09293 1
 -4 4 -1 1.11557 6.06851 3
 5 -4 1 17.6612 6.41044 3
 -5 -4 -1 15.6264 6.34033 3
 5 -4 1 15.3234 6.95936 3
 -5 -4 -1 21.4603 8.14523 3
 -5 4 -1 13.2411 5.91329 3
 5 4 1 14.4126 6.67656 3
 -5 4 -1 19.0521 7.39175 3
 5 4 1 15.1535 8.54631 3
 -5 4 -1 18.9189 6.00068 1
 6 -4 1 86.7903 11.187 3
 6 -4 1 96.6237 12.6224 3
 -6 -4 -1 95.6743 11.8232 3
 -6 -4 -1 120.601 15.1124 3
 -6 4 -1 90.9168 10.7466 1
 6 4 1 96.5549 11.152 3
 6 4 1 91.0573 11.853 3
 -6 4 -1 93.934 11.1248 3
 -6 4 -1 94.2278 9.75751 3
 7 -4 1 5.70963 7.03825 3
 -7 -4 -1 17.1486 7.37617 3
 -7 -4 -1 13.1887 9.67072 3
 7 -4 1 10.9501 7.74618 3
 7 4 1 14.0218 9.20842 3
 -7 4 -1 5.06447 7.91026 3
 7 4 1 10.6997 7.14308 3
 -7 4 -1 17.35 7.09849 1
 -7 4 -1 9.52339 6.7934 3
 8 -4 1 161.001 13.5999 3
 8 -4 1 160.666 15.7651 3
 -8 -4 -1 186.896 17.5684 3
 -8 -4 -1 164.882 14.5205 3
 8 4 1 167.567 14.619 3
 8 4 1 157.168 17.7751 3
 -8 4 -1 174.379 13.6652 3
 -8 4 -1 190.696 16.3766 3
 -8 4 -1 181.727 14.1431 1
 -9 -4 -1 175.773 17.9564 3
 9 -4 1 197.131 15.9011 3
 -9 -4 -1 171.083 19.3326 3
 9 -4 1 202.353 17.1258 3
 9 4 1 175.268 15.8255 3
 9 4 1 169.816 18.6447 3
 -9 4 -1 211.621 17.3492 3
 -9 4 -1 197.426 16.2915 3
 -9 4 -1 174.82 18.1076 1
 -10 -4 -1 151.244 20.8839 3
 10 -4 1 155.737 17.5451 3
 10 -4 1 147.112 16.2361 3
 -10 -4 -1 170.957 16.0976 3
 -10 4 -1 161.138 15.3006 3
 -10 4 -1 148.389 18.2829 3
 10 4 1 224.053 21.6079 3
 -10 4 -1 158.272 16.0507 1
 10 4 1 149.591 15.9538 3
 -11 -4 -1 131.072 16.522 3
 11 -4 1 127.735 17.1732 3
 11 -4 1 135.809 18.6139 3
 -11 -4 -1 164.279 17.6696 3
 11 4 1 166.232 17.8475 3
 11 4 1 163.451 22.1285 3
 -11 4 -1 167.349 20.7109 3
 -11 4 -1 139.137 16.7366 1
 -11 4 -1 153.332 16.2586 3
 12 -4 1 151.115 18.8774 3
 12 -4 1 171.226 20.8938 3
 -12 -4 -1 127.838 14.0227 3
 -12 -4 -1 142.692 18.7536 3
 -12 4 -1 135.861 17.5424 3
 12 4 1 134.803 16.9086 3
 12 4 1 147.357 18.5621 3
 -12 4 -1 130.976 17.9186 1
 -12 4 -1 137.009 16.1531 3
 13 -4 1 48.9239 14.206 3
 13 -4 1 31.1102 12.8215 3
 -13 -4 -1 25.3429 11.5441 3
 -13 -4 -1 46.0709 15.619 3
 13 4 1 20.988 12.1608 3
 13 4 1 27.2851 14.9512 3
 -13 4 -1 38.7236 12.6274 1
 -13 4 -1 42.6787 11.912 3
 -13 4 -1 56.2807 14.4413 3
 14 -4 1 81.2633 15.4168 3
 14 -4 1 110.396 17.7363 3
 -14 -4 -1 59.2029 11.6169 1
 -14 -4 -1 97.2991 18.8677 3
 -14 -4 -1 91.8356 15.2028 3
 -14 4 -1 71.2696 17.6442 3
 -14 4 -1 92.8081 14.4112 3
 14 4 1 50.5729 18.3658 3
 -14 4 -1 78.3814 14.9356 1
 14 4 1 80.0579 14.975 3
 -15 -4 -1 -29.092 14.1672 3
 -15 -4 -1 -4.5074 19.5921 3
 15 -4 1 65.2693 17.4073 3
 15 -4 1 10.0083 15.4006 3
 -15 -4 -1 -15.01 9.86577 1
 15 4 1 18.7442 14.9026 3
 -15 4 -1 10.1707 15.1221 1
 15 4 1 40.0884 18.6525 3
 -15 4 -1 15.8031 14.1894 3
 -15 4 -1 -6.6421 17.7445 3
 -14 -5 1 84.0706 19.7111 3
 14 -5 -1 32.1988 14.3906 3
 -14 -5 1 8.45116 9.04203 1
 -14 -5 1 16.4412 14.8149 3
 14 -5 -1 39.2468 16.1765 3
 14 5 -1 12.619 17.2302 3
 14 5 -1 36.8841 14.4173 3
 -14 5 1 14.6774 13.8324 3
 -14 5 1 49.4838 15.6135 1
 -14 5 1 12.7844 17.0424 3
 -13 -5 1 46.9216 17.3523 3
 13 -5 -1 -9.4528 12.4496 3
 -13 -5 1 1.73266 8.05927 1
 13 -5 -1 6.42469 13.5886 3
 -13 -5 1 12.2583 12.0148 3
 -13 5 1 4.49174 11.6227 3
 -13 5 1 14.643 15.5246 3
 13 5 -1 30.1719 16.7716 3
 -13 5 1 33.8084 13.5764 1
 13 5 -1 40.7236 12.313 3
 -12 -5 1 -14.115 14.5967 3
 -12 -5 1 10.377 7.95297 1
 12 -5 -1 13.4793 12.4246 3
 -12 -5 1 13.0088 11.4105 3
 12 -5 -1 8.88487 11.4189 3
 12 5 -1 31.2903 14.9562 3
 12 5 -1 29.6589 11.922 3
 -12 5 1 14.5295 11.175 3
 -12 5 1 22.4279 12.2393 1
 -12 5 1 17.7557 13.016 3
 -11 -5 1 39.5914 11.0675 3
 11 -5 -1 40.5955 11.2385 3
 -11 -5 1 58.0818 16.2507 3
 11 -5 -1 30.7764 12.1658 3
 -11 5 1 52.6096 12.4554 1
 -11 5 1 39.2485 13.2355 3
 -11 5 1 50.7361 11.0492 3
 11 5 -1 67.0449 15.4334 3
 11 5 -1 33.402 11.3289 3
 -10 -5 1 41.914 13.2575 3
 10 -5 -1 -12.463 10.6099 3
 -10 -5 1 17.3974 9.48759 3
 10 -5 -1 -4.0459 9.27651 3
 10 5 -1 -8.7469 13.045 3
 -10 5 1 8.65027 9.94266 1
 -10 5 1 7.59665 8.92217 3
 10 5 -1 -0.4589 10.1008 3
 -10 5 1 0.79462 10.9331 3
 9 -5 -1 -2.9658 9.4601 3
 9 -5 -1 1.00212 8.64015 3
 -9 -5 1 15.6507 8.9187 3
 -9 -5 1 27.8497 12.1928 3
 9 5 -1 14.8373 9.81174 3
 -9 5 1 13.2434 10.4137 3
 9 5 -1 1.4754 11.8453 3
 -9 5 1 24.8836 8.92247 3
 -9 5 1 -1.0008 8.59845 1
 8 -5 -1 54.8496 10.701 3
 8 -5 -1 61.8759 10.9054 3
 -8 -5 1 52.6537 12.008 3
 -8 -5 1 63.3828 9.90203 3
 -8 5 1 61.272 11.1001 1
 -8 5 1 44.2113 10.5437 3
 8 5 -1 43.1256 12.1724 3
 8 5 -1 58.0245 11.2518 3
 -8 5 1 48.147 9.08686 3
 -7 -5 1 22.1003 11.4276 3
 -7 -5 1 17.4725 8.22099 3
 7 -5 -1 2.24996 8.32209 3
 7 -5 -1 15.2206 8.06115 3
 7 5 -1 13.784 8.77211 3
 -7 5 1 15.9594 8.21665 1
 7 5 -1 19.2207 10.91 3
 -7 5 1 2.46939 11.9158 3
 -7 5 1 16.0586 8.88973 3
 6 -5 -1 13.5631 7.71428 3
 -6 -5 1 4.47266 7.64522 3
 -6 -5 1 3.1804 9.04293 3
 6 -5 -1 9.53823 5.25694 2
 6 -5 -1 12.9125 8.20176 3
 -6 5 1 4.96474 8.21757 3
 6 5 -1 1.96014 8.06985 3
 -6 5 1 13.8404 7.35774 1
 6 5 -1 18.289 10.6067 3
 -6 5 1 12.9072 7.23755 3
 5 -5 -1 24.7678 7.76063 3
 -5 -5 1 18.5498 10.3829 3
 5 -5 -1 15.3991 7.68477 3
 -5 -5 1 16.312 7.34461 3
 5 -5 -1 17.4444 4.72843 2
 -5 5 1 15.8743 6.92607 1
 5 5 -1 17.2925 7.80377 3
 -5 5 1 16.9055 8.35024 3
 5 5 -1 19.6939 9.99744 3
 -5 5 1 6.92263 6.79146 3
 4 -5 -1 93.1727 11.529 3
 4 -5 -1 91.3877 12.6971 3
 -4 -5 1 124.271 12.4664 3
 4 -5 -1 98.9189 10.9303 1
 -4 5 1 85.8953 10.0448 3
 4 5 -1 116.026 15.2707 3
 4 5 -1 90.7474 9.9021 3
 -4 5 1 96.2538 10.1045 1
 4 5 -1 98.5784 9.27699 2
 -4 5 1 113.157 11.3153 3
 -3 -5 1 400.297 12.1324 1
 3 -5 -1 415.621 16.8429 3
 -3 -5 1 398.112 16.8704 3
 -3 -5 1 437.059 17.9803 3
 3 -5 -1 407.808 15.9406 1
 3 -5 -1 407.013 18.0116 3
 -3 5 1 406.615 15.1127 1
 3 5 -1 406.658 17.931 3
 3 5 -1 439.894 20.7858 3
 -3 5 1 417.987 18.7188 3
 3 5 -1 395.085 14.0971 2
 2 -5 -1 132.307 12.496 3
 -2 -5 1 131.856 11.4965 3
 2 -5 -1 123.176 11.6183 3
 -2 -5 1 117.949 12.5269 3
 -2 -5 1 107.83 6.78316 1
 2 -5 -1 127.109 9.92514 1
 -2 5 1 117.655 15.0041 3
 -2 5 1 103.647 12.493 3
 2 5 -1 131.76 13.1252 3
 2 5 -1 108.171 8.18633 2
 2 5 -1 151.193 15.5462 3
 -1 -5 1 -3.8978 6.29526 3
 1 -5 -1 8.5075 6.76869 3
 -1 -5 1 3.16617 6.34448 3
 1 -5 -1 6.29319 4.9731 1
 -1 -5 1 7.40158 3.88722 1
 1 -5 -1 5.38093 6.32206 3
 1 5 -1 -1.7245 4.3957 2
 1 5 -1 6.14251 6.80778 3
 -1 5 1 1.84585 7.85967 3
 -1 5 1 6.80893 7.16244 3
 1 5 -1 -1.3243 8.29071 3
 0 -5 -1 267.515 13.6548 3
 0 -5 1 245.049 10.2214 1
 0 -5 -1 261.696 14.628 3
 0 -5 1 273.965 14.7574 3
 0 -5 1 259.659 13.8624 3
 0 -5 -1 242.752 10.8168 1
 0 5 -1 255.387 16.9321 3
 0 5 -1 252.072 15.041 3
 0 5 1 236.991 17.2449 3
 0 5 1 273.016 14.9705 3
 0 5 -1 243.591 10.14 2
 1 -5 1 55.4349 7.99483 1
 -1 -5 -1 71.9745 8.2263 3
 -1 -5 -1 70.5833 8.60363 3
 1 -5 1 53.1442 7.84314 3
 1 -5 1 95.3464 12.2627 3
 -1 -5 -1 58.8841 7.39666 1
 -1 5 -1 78.2024 9.33711 3
 1 5 1 83.2219 10.8091 3
 -1 5 -1 75.5054 10.5784 3
 1 5 1 60.9354 6.45538 2
 1 5 1 75.2739 9.06077 3
 2 -5 1 88.2786 10.9878 3
 2 -5 1 83.2312 6.78316 2
 2 -5 1 84.0265 9.48253 3
 -2 -5 -1 75.9515 7.22602 1
 -2 -5 -1 79.342 8.35886 3
 -2 -5 -1 90.7942 11.8472 3
 2 -5 1 95.3088 9.01134 1
 2 5 1 93.1484 9.42562 3
 -2 5 -1 95.844 12.6564 3
 -2 5 -1 99.4329 8.26873 1
 2 5 1 79.3976 7.16152 2
 2 5 1 121.893 14.6555 3
 3 -5 1 97.6717 7.23872 2
 -3 -5 -1 86.0984 7.20788 1
 3 -5 1 87.6119 11.5259 3
 -3 -5 -1 91.8885 12.2473 3
 3 -5 1 94.3721 12.8154 3
 -3 5 -1 99.1423 13.1469 3
 3 5 1 92.267 12.6338 3
 -3 5 -1 84.9453 9.06522 1
 3 5 1 92.5864 11.3895 3
 -3 5 -1 88.5464 8.96789 3
 3 5 1 86.5795 8.09469 2
 4 -5 1 134.189 8.54679 2
 -4 -5 -1 143.675 12.9233 3
 -4 -5 -1 139.945 16.9795 3
 4 -5 1 129.621 12.378 3
 4 -5 1 135.771 13.4733 3
 4 5 1 119.595 16.0987 3
 4 5 1 144.839 13.5846 3
 -4 5 -1 143.536 10.8921 1
 -4 5 -1 124.176 12.3296 3
 -4 5 -1 130.431 14.6882 3
 5 -5 1 11.6507 7.91291 3
 -5 -5 -1 5.27846 9.81481 3
 5 -5 1 12.7576 5.22114 2
 -5 -5 -1 5.10511 7.06717 3
 5 -5 1 6.4839 7.2995 3
 5 5 1 7.07352 9.76156 3
 -5 5 -1 8.49991 8.2172 3
 -5 5 -1 1.34445 7.09754 3
 5 5 1 4.24078 7.64536 3
 -5 5 -1 4.15263 6.43024 1
 -6 -5 -1 36.8808 8.82746 3
 -6 -5 -1 33.6753 11.622 3
 6 -5 1 24.5431 8.95233 3
 6 -5 1 33.6811 6.23956 2
 6 -5 1 27.3826 8.1036 3
 6 5 1 25.9844 10.8039 3
 -6 5 -1 11.7737 8.50543 3
 -6 5 -1 20.8658 7.39473 1
 6 5 1 24.3521 9.01402 3
 -6 5 -1 34.2753 8.37219 3
 7 -5 1 23.9588 8.44301 3
 7 -5 1 17.9562 8.84253 3
 -7 -5 -1 20.8684 11.8185 3
 -7 -5 -1 25.5393 8.96837 3
 -7 5 -1 25.6086 9.65861 3
 7 5 1 28.3703 9.20512 3
 7 5 1 17.6999 11.5349 3
 -7 5 -1 29.0089 8.71882 3
 -7 5 -1 27.7146 8.23865 1
 -8 -5 -1 -2.6019 10.0891 3
 -8 -5 -1 -0.7959 11.1176 3
 8 -5 1 -9.0677 13.3724 3
 8 -5 1 12.206 10.2617 3
 -8 5 -1 0.10715 8.62253 1
 8 5 1 5.78916 8.42191 3
 -8 5 -1 13.1141 10.1028 3
 -8 5 -1 1.71889 8.20569 3
 8 5 1 0.55523 11.4688 3
 9 -5 1 73.8899 11.1084 3
 9 -5 1 77.7988 12.6634 3
 -9 -5 -1 68.3106 10.7622 3
 -9 -5 -1 69.9866 14.5519 3
 -9 5 -1 67.7255 10.933 1
 9 5 1 85.2112 11.9707 3
 9 5 1 80.6662 15.2551 3
 -9 5 -1 74.8987 11.1315 3
 -9 5 -1 79.0194 12.5816 3
 10 -5 1 10.9582 11.084 3
 -10 -5 -1 44.0885 13.1261 3
 -10 -5 -1 24.2267 10.0405 3
 10 -5 1 25.6617 10.182 3
 -10 5 -1 5.95574 9.8505 1
 10 5 1 40.029 14.7043 3
 -10 5 -1 -2.5105 9.7599 3
 -10 5 -1 20.9 11.7223 3
 10 5 1 42.8471 10.7525 3
 11 -5 1 27.5248 12.0711 3
 -11 -5 -1 42.2886 11.0418 3
 11 -5 1 37.8078 11.3871 3
 -11 -5 -1 42.114 15.3268 3
 11 5 1 46.1585 15.2144 3
 -11 5 -1 20.8163 12.964 3
 -11 5 -1 25.1498 11.4598 1
 -11 5 -1 33.426 11.198 3
 11 5 1 39.2142 11.9889 3
 -12 -5 -1 0.16071 16.3187 3
 -12 -5 -1 -7.777 10.5531 3
 12 -5 1 8.94264 11.7684 3
 12 -5 1 11.7257 13.5319 3
 12 5 1 8.28076 15.5132 3
 -12 5 -1 1.08467 11.6808 1
 -12 5 -1 18.5082 12.0909 3
 12 5 1 7.32476 12.5082 3
 -12 5 -1 3.10312 13.5169 3
 13 -5 1 -24.585 14.9689 3
 13 -5 1 -5.2975 12.7088 3
 -13 -5 -1 -0.1559 17.84 3
 -13 -5 -1 -2.3379 12.2072 3
 -13 5 -1 -13.535 12.0363 1
 13 5 1 16.2828 13.8583 3
 -13 5 -1 16.6073 12.2407 3
 -13 5 -1 -12.33 15.4808 3
 13 5 1 44.9464 17.1887 3
 14 -5 1 17.4739 16.4861 3
 -14 -5 -1 23.0878 10.9249 1
 14 -5 1 49.4205 16.3653 3
 -14 -5 -1 22.2906 20.2548 3
 -14 -5 -1 59.5205 15.9385 3
 -14 5 -1 34.0472 17.918 3
 -14 5 -1 55.9007 15.2998 3
 -14 5 -1 31.4091 15.2344 1
 14 5 1 86.5426 19.7227 3
 14 5 1 61.6046 15.2263 3
 12 -6 -1 9.34233 12.8817 3
 -12 -6 1 2.81585 12.1201 3
 -12 -6 1 7.54012 17.8313 3
 12 -6 -1 1.39889 14.0536 3
 -12 -6 1 8.58937 7.54797 1
 -12 6 1 8.81181 12.6153 3
 -12 6 1 1.95473 15.9617 3
 -12 6 1 15.3386 13.3002 1
 12 6 -1 -5.2829 17.3234 3
 12 6 -1 -12.212 13.6931 3
 11 -6 -1 104.453 14.987 3
 -11 -6 1 69.2109 8.68189 1
 -11 -6 1 77.1344 13.5995 3
 11 -6 -1 92.428 15.3802 3
 -11 -6 1 88.4162 17.76 3
 -11 6 1 76.6987 13.0974 3
 -11 6 1 93.2154 16.4704 3
 11 6 -1 107.547 15.2613 3
 11 6 -1 87.5875 18.947 3
 -11 6 1 87.9773 14.0226 1
 -10 -6 1 24.7698 15.8873 3
 10 -6 -1 38.0549 11.2841 3
 10 -6 -1 0.10205 11.6642 3
 -10 -6 1 21.7861 11.088 3
 -10 6 1 29.0212 10.9639 3
 -10 6 1 30.884 11.6838 1
 10 6 -1 19.7128 12.1363 3
 10 6 -1 32.8308 15.4815 3
 -10 6 1 29.9315 12.925 3
 -9 -6 1 44.6907 16.355 3
 9 -6 -1 42.307 10.6929 3
 -9 -6 1 20.0721 10.631 3
 9 -6 -1 42.7971 11.9322 3
 -9 6 1 27.9729 10.9742 3
 -9 6 1 40.5378 11.2453 1
 9 6 -1 28.4638 13.2096 3
 -9 6 1 19.7481 11.8655 3
 9 6 -1 25.2738 11.7252 3
 8 -6 -1 28.2854 10.2327 3
 -8 -6 1 31.2227 10.4676 3
 8 -6 -1 24.3609 10.7856 3
 -8 -6 1 24.082 13.8505 3
 8 -6 -1 32.0277 7.35596 2
 8 6 -1 20.727 13.6553 3
 -8 6 1 35.0901 10.7825 1
 -8 6 1 45.6908 11.9062 3
 8 6 -1 56.1521 11.6887 3
 -8 6 1 29.29 10.0601 3
 7 -6 -1 55.5026 10.4765 3
 -7 -6 1 42.6962 9.99096 3
 -7 -6 1 38.7133 14.737 3
 7 -6 -1 50.373 6.76437 2
 7 -6 -1 53.1248 11.0717 3
 -7 6 1 40.8428 15.6944 1
 -7 6 1 44.6763 11.3918 3
 -7 6 1 33.5885 9.81148 3
 7 6 -1 53.786 11.1157 3
 7 6 -1 51.1712 13.4495 3
 6 -6 -1 69.5489 11.2143 3
 -6 -6 1 89.5317 11.6732 3
 6 -6 -1 74.1177 11.661 3
 6 6 -1 89.2045 14.5936 3
 6 6 -1 100.017 12.5614 3
 -6 6 1 71.5246 9.92244 1
 -6 6 1 83.1731 10.7676 3
 -6 6 1 93.6645 12.6062 3
 -5 -6 1 309.837 17.872 3
 5 -6 -1 315.515 19.1458 3
 5 -6 -1 309.796 17.4106 3
 -5 -6 1 266.22 10.2077 1
 -5 -6 1 287.1 16.884 3
 -5 6 1 336.193 20.4462 3
 5 6 -1 294.083 14.1327 2
 -5 6 1 284.38 19.2508 3
 5 6 -1 324.958 19.4195 3
 5 6 -1 309.403 22.6789 3
 -5 6 1 292.563 15.5569 1
 4 -6 -1 120.118 12.8149 1
 -4 -6 1 91.6439 11.1713 3
 -4 -6 1 112.621 13.823 3
 -4 -6 1 102.437 6.90406 1
 4 -6 -1 95.0731 11.4997 3
 4 -6 -1 96.8241 10.7866 3
 4 6 -1 85.8791 11.2976 3
 4 6 -1 86.7117 9.96233 2
 -4 6 1 86.0857 11.5867 1
 4 6 -1 103.642 13.4137 3
 -4 6 1 84.7472 11.5738 3
 3 -6 -1 384.675 18.5552 3
 3 -6 -1 400.298 19.8799 3
 3 -6 -1 402.608 17.1705 1
 -3 -6 1 380.011 12.2416 1
 -3 -6 1 398.272 18.9784 3
 -3 -6 1 394.792 19.4452 3
 3 6 -1 401.884 23.2222 3
 3 6 -1 386.458 14.5036 2
 3 6 -1 383.628 20.1747 3
 -3 6 1 389.839 23.214 3
 -3 6 1 392.172 20.4271 3
 -2 -6 1 -6.0766 7.48902 3
 2 -6 -1 -12.003 6.1188 1
 -2 -6 1 -7.4899 3.97044 1
 -2 -6 1 -0.4444 7.92712 3
 2 -6 -1 2.46588 7.81091 3
 2 -6 -1 -11.536 7.25039 3
 -2 6 1 -4.9819 8.19324 3
 -2 6 1 10.5225 10.0282 3
 2 6 -1 -1.5498 8.07956 3
 2 6 -1 -1.5854 5.39783 2
 2 6 -1 -7.6503 10.2295 3
 -1 -6 1 35.1597 5.32695 1
 1 -6 -1 41.094 7.16406 1
 1 -6 -1 31.4067 9.12022 3
 1 -6 -1 35.5603 8.32594 3
 -1 -6 1 38.0307 8.85814 3
 -1 -6 1 42.9975 9.32128 3
 1 6 -1 39.5501 5.77403 2
 -1 6 1 19.5425 9.05956 3
 1 6 -1 38.6417 11.0797 3
 1 6 -1 31.2667 9.46375 3
 -1 6 1 23.5947 10.8948 3
 0 -6 1 0.95283 7.27762 3
 0 -6 -1 11.164 8.30259 3
 0 -6 1 -6.1114 4.97788 1
 0 -6 -1 -9.2413 7.17175 3
 0 -6 -1 5.15665 5.20186 1
 0 -6 1 6.98772 7.81427 3
 0 6 1 2.59183 10.1349 3
 0 6 -1 4.23167 10.067 3
 0 6 -1 10.0318 8.45398 3
 0 6 1 10.7766 8.69601 3
 1 -6 1 49.0071 6.66288 1
 -1 -6 -1 25.0331 5.74067 1
 1 -6 1 30.7983 8.95748 3
 -1 -6 -1 23.4916 8.2849 3
 1 -6 1 38.135 8.94387 3
 -1 -6 -1 25.1742 8.92434 3
 1 6 1 22.9539 9.60241 3
 -1 6 -1 46.7325 11.6493 3
 1 6 1 34.1039 5.02494 2
 -1 6 -1 30.0328 9.1073 3
 1 6 1 29.2021 11.5431 3
 2 -6 1 43.6709 9.63801 3
 -2 -6 -1 56.5583 9.44925 3
 -2 -6 -1 48.5141 6.00708 1
 2 -6 1 57.5842 9.07955 3
 -2 -6 -1 62.877 9.40616 3
 2 6 1 57.0525 12.1146 3
 -2 6 -1 54.4158 11.8365 3
 -2 6 -1 44.2173 9.8849 3
 2 6 1 57.074 7.56275 2
 2 6 1 40.6327 9.46814 3
 -3 -6 -1 147.684 9.46389 1
 -3 -6 -1 170.802 15.691 3
 3 -6 1 180.063 16.5136 3
 -3 -6 -1 191.931 14.7197 3
 3 -6 1 151.758 14.7598 3
 3 6 1 167.996 9.79515 2
 3 6 1 146.359 19.3318 3
 -3 6 -1 154.979 11.4896 1
 3 6 1 133.882 15.8592 3
 -3 6 -1 189.837 16.6389 3
 4 -6 1 270.905 18.0412 3
 -4 -6 -1 246.569 10.6918 1
 -4 -6 -1 248.525 17.1703 3
 4 -6 1 250.305 10.6167 2
 4 -6 1 217.775 16.507 3
 -4 6 -1 246.366 13.7684 1
 4 6 1 228.392 11.9637 2
 4 6 1 222.749 21.3807 3
 4 6 1 240.673 17.8753 3
 -4 6 -1 232.579 18.3074 3
 -4 6 -1 263.253 15.9924 3
 5 -6 1 52.7197 6.48242 2
 5 -6 1 43.3975 9.93815 3
 5 -6 1 42.2411 10.5295 3
 -5 -6 -1 52.4828 10.1557 3
 -5 -6 -1 47.9831 13.0283 3
 -5 6 -1 53.9823 10.7569 3
 5 6 1 43.5235 10.5563 3
 -5 6 -1 44.7473 9.87629 3
 5 6 1 72.3761 13.4242 3
 -5 6 -1 49.2244 8.69013 1
 -6 -6 -1 107.171 14.1472 3
 -6 -6 -1 109.742 15.3844 3
 6 -6 1 139.245 16.6584 3
 6 -6 1 115.617 16.885 3
 6 -6 1 136.984 10.5744 2
 -6 6 -1 97.6111 13.8682 1
 6 6 1 122.435 16.8821 3
 -6 6 -1 96.0544 13.1413 3
 -6 6 -1 128.264 14.6563 3
 6 6 1 120.654 15.6989 3
 7 -6 1 96.2785 12.0648 3
 -7 -6 -1 67.8801 14.1964 3
 -7 -6 -1 108.204 12.5981 3
 7 -6 1 100.811 12.5141 3
 7 -6 1 95.5533 11.2294 2
 -7 6 -1 112.722 14.5045 1
 7 6 1 57.4807 17.7727 3
 -7 6 -1 93.6451 11.936 3
 7 6 1 128.442 15.8445 3
 -7 6 -1 83.8597 12.9145 3
 8 -6 1 49.5435 11.6477 3
 8 -6 1 59.2093 12.9357 3
 -8 -6 -1 72.1663 11.6584 3
 -8 -6 -1 31.3234 13.2603 3
 8 -6 1 72.2651 8.86274 2
 -8 6 -1 67.8932 10.9832 1
 8 6 1 56.1003 14.658 3
 8 6 1 49.6635 12.2785 3
 -8 6 -1 53.7546 10.6142 3
 -8 6 -1 68.725 13.3291 3
 9 -6 1 140.751 15.359 3
 -9 -6 -1 202.894 26.2618 3
 -9 -6 -1 175.662 18.9017 3
 9 -6 1 158.014 14.637 2
 9 -6 1 147.677 17.939 3
 -9 6 -1 119.221 16.3563 3
 -9 6 -1 149.069 17.6525 1
 -9 6 -1 175.931 20.7635 3
 9 6 1 134.357 17.8655 3
 9 6 1 132.575 15.3369 3
 10 -6 1 41.6118 12.2381 3
 -10 -6 -1 34.2047 12.1783 3
 10 -6 1 20.8226 12.7745 3
 -10 -6 -1 55.0337 16.3944 3
 -10 6 -1 51.4955 11.8862 3
 10 6 1 35.5034 12.7339 3
 10 6 1 11.8189 15.6448 3
 -10 6 -1 33.9831 14.0742 3
 -10 6 -1 37.5021 11.8713 1
 -11 -6 -1 12.9501 18.3402 3
 11 -6 1 20.0898 12.6009 3
 11 -6 1 39.9324 14.688 3
 -11 -6 -1 -5.1175 11.3232 3
 -11 6 -1 30.525 15.6005 3
 -11 6 -1 22.8183 10.7478 3
 -11 6 -1 -3.7125 12.1931 1
 11 6 1 16.9631 13.4875 3
 11 6 1 19.7958 17.5113 3
 12 -6 1 3.55879 15.1547 3
 12 -6 1 2.89517 13.5493 3
 -12 -6 -1 32.5079 13.7204 3
 -12 -6 -1 -2.7178 17.6917 3
 -12 6 -1 9.83986 12.765 3
 -12 6 -1 -6.262 16.3065 3
 12 6 1 2.80622 14.8745 3
 -12 6 -1 -10.363 12.3789 1
 12 6 1 23.341 18.4632 3
 -11 -7 1 30.5249 6.62326 1
 -11 -7 1 20.0303 13.9047 3
 11 -7 -1 5.1956 14.3248 3
 11 -7 -1 34.0438 14.7425 3
 -11 -7 1 9.15309 21.1472 3
 11 -7 -1 28.3574 10.7976 2
 -11 7 1 6.55129 14.3105 3
 -11 7 1 2.64542 17.0364 3
 11 7 -1 9.93261 15.3068 3
 11 7 -1 50.1273 21.3783 3
 -11 7 1 42.799 14.5207 1
 -10 -7 1 64.8013 13.9837 3
 10 -7 -1 26.3655 14.67 3
 -10 -7 1 15.9097 18.3494 3
 10 -7 -1 -12.206 12.5456 3
 -10 -7 1 22.3683 6.26305 1
 10 -7 -1 38.3842 9.22024 2
 10 7 -1 23.6233 15.4402 3
 -10 7 1 8.53854 15.2409 3
 -10 7 1 18.1485 11.9884 3
 10 7 -1 14.7075 18.9123 3
 -10 7 1 28.6457 13.4367 1
 -9 -7 1 16.2893 12.0075 3
 9 -7 -1 10.5564 7.67306 2
 -9 -7 1 26.4941 18.4797 3
 9 -7 -1 17.0056 12.3899 3
 9 -7 -1 25.8992 13.241 3
 -9 7 1 19.15 10.9697 3
 9 7 -1 21.2452 14.4637 3
 9 7 -1 24.5299 16.9463 3
 -9 7 1 0.30994 13.6159 3
 -9 7 1 -2.1435 12.3111 1
 8 -7 -1 93.5933 14.0406 3
 8 -7 -1 98.4016 15.3967 3
 -8 -7 1 66.8521 14.1829 3
 -8 7 1 95.8158 15.0919 3
 8 7 -1 102.39 11.9355 2
 -8 7 1 106.536 13.3239 3
 -8 7 1 92.5444 13.5664 1
 8 7 -1 79.4059 14.6142 3
 8 7 -1 128.598 18.7074 3
 7 -7 -1 18.516 11.5084 3
 -7 -7 1 -22.418 9.63997 3
 -7 -7 1 -13.468 10.5685 3
 7 -7 -1 3.90171 11.6842 3
 -7 7 1 8.42961 10.1601 3
 7 7 -1 16.5591 8.78061 2
 -7 7 1 9.93743 10.0014 1
 -7 7 1 1.88562 11.8185 3
 7 7 -1 -3.7578 11.417 3
 7 7 -1 4.25601 14.8354 3
 -6 -7 1 187.809 18.0587 3
 6 -7 -1 176.494 19.9363 3
 6 -7 -1 164.501 19.4356 3
 -6 -7 1 188.086 19.236 3
 -6 7 1 188.509 19.4603 1
 6 7 -1 152.685 20.1972 3
 -6 7 1 207.958 22.0338 3
 6 7 -1 181.526 19.8321 3
 6 7 -1 172.105 14.2905 2
 -5 -7 1 -2.7854 10.2317 3
 5 -7 -1 9.73692 9.84553 3
 -5 -7 1 1.02743 9.72884 3
 5 -7 -1 -3.8127 10.5569 3
 -5 7 1 7.65249 13.2636 3
 5 7 -1 -3.8179 13.7709 3
 -5 7 1 -7.3737 10.7462 3
 5 7 -1 -5.5789 6.79958 2
 5 7 -1 16.5163 11.039 3
 4 -7 -1 169.273 19.2598 3
 -4 -7 1 172.089 17.2907 3
 -4 -7 1 221.091 18.8943 3
 4 -7 -1 186.909 17.3163 3
 4 7 -1 178.365 23.73 3
 -4 7 1 156.87 19.5021 3
 4 7 -1 179.755 13.0016 2
 -4 7 1 196.965 23.4579 3
 -3 -7 1 2.99196 18.9496 3
 -3 -7 1 -6.494 4.57074 1
 -3 -7 1 -3.1329 8.66285 3
 3 -7 -1 6.75989 10.0043 3
 3 -7 -1 6.52514 10.2789 3
 -3 7 1 5.9847 10.9552 3
 3 7 -1 1.25629 12.1868 3
 3 7 -1 -14.821 9.75737 3
 -3 7 1 -0.7297 11.9115 3
 3 7 -1 1.32136 6.40769 2
 2 -7 -1 38.5151 10.5958 3
 -2 -7 1 30.3024 11.4629 3
 -2 -7 1 29.2158 9.95294 3
 -2 -7 1 39.8042 5.95508 1
 2 -7 -1 33.9648 8.54646 1
 2 -7 -1 25.3322 10.2853 3
 -2 7 1 33.8811 11.2495 3
 2 7 -1 38.9822 6.94245 2
 -2 7 1 18.7284 13.2156 3
 2 7 -1 18.9059 11.0904 3
 2 7 -1 18.3824 13.0391 3
 -1 -7 1 5.98753 9.61219 3
 1 -7 -1 38.6163 7.80205 1
 1 -7 -1 23.6517 9.86407 3
 1 -7 -1 23.0874 10.5708 3
 -1 -7 1 23.8163 6.17776 1
 -1 -7 1 21.6329 9.22452 3
 1 7 -1 10.4221 12.398 3
 1 7 -1 31.3716 6.54444 2
 -1 7 1 4.69155 21.6888 3
 1 7 -1 20.3536 10.5506 3
 -1 7 1 10.6165 10.1348 3
 0 -7 -1 18.652 7.01524 1
 0 -7 1 20.4722 10.728 3
 0 -7 -1 31.5325 9.73083 3
 0 -7 -1 21.4508 9.52662 3
 0 -7 1 11.4926 9.43765 3
 0 7 -1 13.7346 12.8973 3
 0 7 1 15.8472 12.4008 3
 0 7 1 33.1593 10.5607 3
 0 7 -1 31.4378 10.3715 3
 -1 -7 -1 0.70436 9.72337 3
 1 -7 1 0.34824 9.74623 3
 1 -7 1 19.2117 10.2261 3
 -1 -7 -1 13.8175 10.3249 3
 -1 -7 -1 16.063 6.23217 1
 -1 7 -1 25.518 10.4308 3
 1 7 1 10.1843 9.86107 3
 1 7 1 1.93196 12.0877 3
 -1 7 -1 8.80196 13.1348 3
 2 -7 1 20.6165 10.3115 3
 -2 -7 -1 8.25072 5.57007 1
 -2 -7 -1 12.6939 9.99289 3
 -2 -7 -1 7.16484 8.87608 3
 2 -7 1 -5.1995 10.0099 3
 2 7 1 9.16874 12.4629 3
 2 7 1 14.7098 5.86361 2
 2 7 1 -3.0626 10.1285 3
 -2 7 -1 -3.2662 10.1982 3
 -2 7 -1 21.5172 18.8334 3
 -3 -7 -1 -9.5662 9.52035 3
 3 -7 1 7.08913 9.69165 3
 -3 -7 -1 1.09495 9.18746 3
 3 -7 1 1.79457 10.0576 3
 -3 -7 -1 2.72805 5.23262 1
 3 7 1 3.86012 10.076 3
 3 7 1 -1.2262 5.88753 2
 3 7 1 -10.653 12.2809 3
 -3 7 -1 -6.2552 12.27 3
 -3 7 -1 -7.9429 10.2656 3
 4 -7 1 139.675 18.7737 3
 -4 -7 -1 85.699 12.7742 3
 -4 -7 -1 99.8069 9.23188 1
 4 -7 1 119.76 16.0809 3
 -4 -7 -1 98.8808 15.5802 3
 4 7 1 102.017 13.5227 3
 4 7 1 91.1563 16.7671 3
 -4 7 -1 110.476 14.5254 3
 4 7 1 110.235 10.5925 2
 -4 7 -1 115.418 17.0881 3
 5 -7 1 31.7657 11.4862 3
 5 -7 1 60.9101 12.0996 3
 -5 -7 -1 26.2499 11.3186 3
 -5 -7 -1 36.6984 6.43305 1
 -5 -7 -1 39.5804 11.032 3
 5 7 1 35.8057 11.6282 3
 -5 7 -1 46.2594 12.8072 3
 5 7 1 26.7791 15.1364 3
 5 7 1 39.1034 7.97943 2
 -5 7 -1 37.8037 9.22063 1
 -6 -7 -1 37.9681 6.28429 1
 6 -7 1 28.453 12.0219 3
 6 -7 1 43.218 12.6357 3
 -6 -7 -1 41.8281 12.0217 3
 -6 7 -1 46.4856 11.6285 3
 -6 7 -1 35.2317 11.8227 1
 6 7 1 26.652 15.1939 3
 6 7 1 40.3239 12.0269 3
 -6 7 -1 19.9206 13.2876 3
 6 7 1 36.5641 8.57714 2
 7 -7 1 33.962 6.93355 2
 -7 -7 -1 35.2846 12.3995 3
 7 -7 1 25.7557 11.9971 3
 7 -7 1 28.3927 11.9648 3
 -7 7 -1 21.2009 12.6273 3
 7 7 1 83.8551 16.7496 3
 -7 7 -1 2.05913 10.1202 1
 7 7 1 24.3683 12.4295 3
 -7 7 -1 16.2556 11.4802 3
 7 7 1 36.3851 9.55091 2
 -8 -7 -1 137.299 16.0042 3
 8 -7 1 128.868 12.7476 2
 -8 -7 -1 142.34 20.3556 3
 8 -7 1 129.62 16.3861 3
 8 -7 1 105.907 14.919 3
 8 7 1 115.168 16.0695 3
 -8 7 -1 103.026 14.5226 3
 -8 7 -1 111.82 16.1705 3
 -8 7 -1 137.484 17.4721 1
 8 7 1 81.2298 18.8158 3
 9 -7 1 25.7976 12.3802 3
 9 -7 1 1.75238 8.84636 2
 -9 -7 -1 18.4406 16.617 3
 9 -7 1 -0.0721 13.8582 3
 9 7 1 14.4817 13.0275 3
 -9 7 -1 20.9803 12.456 1
 -9 7 -1 17.5599 12.2928 3
 -9 7 -1 17.1755 13.9662 3
 9 7 1 7.94103 16.3276 3
 10 -7 1 52.6755 10.4964 2
 -10 -7 -1 32.8112 14.0519 3
 10 -7 1 35.0044 13.807 3
 10 -7 1 65.4011 16.0524 3
 -10 -7 -1 26.7411 20.1883 3
 -10 7 -1 67.8707 14.7326 3
 -10 7 -1 46.3144 17.2909 3
 10 7 1 27.0532 19.8311 3
 -10 7 -1 50.1914 14.5548 1
 10 7 1 50.0242 15.3554 3
 8 -8 -1 36.6258 15.2343 3
 8 -8 -1 14.4347 16.8485 3
 -8 -8 1 20.6572 14.4618 3
 -8 -8 1 8.43754 13.616 3
 8 8 -1 -13.584 15.2959 3
 8 8 -1 -16.627 10.6899 2
 -8 8 1 20.1291 16.1626 3
 -8 8 1 -9.7797 18.2779 3
 -8 8 1 24.6912 12.5247 1
 7 -8 -1 3.44065 13.6265 3
 7 -8 -1 23.0025 15.5707 3
 -7 -8 1 -10.984 13.0853 3
 -7 -8 1 -12.317 13.0115 3
 7 8 -1 8.3527 34.9691 3
 7 8 -1 17.3922 14.2495 3
 7 8 -1 -1.4355 9.46515 2
 -7 8 1 8.81064 14.7757 3
 -7 8 1 1.71957 18.6564 3
 6 -8 -1 30.8685 13.5819 3
 -6 -8 1 -2.5227 13.2242 3
 6 -8 -1 35.5564 15.2358 3
 -6 -8 1 19.2581 13.3537 3
 -6 8 1 46.0491 17.8847 3
 6 8 -1 25.4571 9.79342 2
 -6 8 1 53.8854 15.9489 3
 6 8 -1 -35.846 26.3181 3
 6 8 -1 9.98056 13.5694 3
 5 -8 -1 -2.7573 12.4685 3
 -5 -8 1 12.649 13.1779 3
 5 -8 -1 9.00938 13.2433 3
 -5 -8 1 1.10869 12.5258 3
 5 8 -1 0.8935 8.22479 2
 -5 8 1 6.54824 14.0533 3
 5 8 -1 -5.5397 13.2605 3
 -5 8 1 2.63784 16.5307 3
 4 -8 -1 42.1671 11.7872 3
 -4 -8 1 53.0587 13.3605 3
 -4 -8 1 87.8857 13.7622 3
 4 -8 -1 60.4397 14.595 3
 4 8 -1 39.4437 8.75053 2
 -4 8 1 39.0168 17.2674 3
 4 8 -1 53.6997 14.8279 3
 -4 8 1 44.6403 14.7698 3
 4 8 -1 61.5693 26.9775 3
 3 -8 -1 5.01864 12.31 3
 3 -8 -1 0.51645 11.2821 3
 -3 -8 1 -19.945 11.8914 3
 -3 -8 1 13.1659 12.2921 3
 3 8 -1 12.6558 7.74594 2
 -3 8 1 -14.531 14.9429 3
 3 8 -1 2.62254 12.6748 3
 -3 8 1 -30.605 12.8715 3
 3 8 -1 -13.12 16.0298 3
 -2 -8 1 -1.7424 11.7435 3
 2 -8 -1 30.6007 11.1846 3
 2 -8 -1 13.0678 12.3405 3
 -2 -8 1 -6.3366 11.2524 3
 -2 8 1 21.0827 12.7508 3
 2 8 -1 9.05497 14.6953 3
 -2 8 1 -14.79 15.4078 3
 2 8 -1 22.8887 13.2108 3
 1 -8 -1 21.3384 12.0631 3
 -1 -8 1 20.902 12.9897 3
 -1 -8 1 -5.4579 19.4308 3
 1 -8 -1 21.8391 11.9402 3
 1 8 -1 -6.3565 15.4323 3
 1 8 -1 10.5129 12.6852 3
 -1 8 1 1.06593 15.2572 3
 -1 8 1 18.657 12.3128 3
 0 -8 1 -14.201 10.7419 3
 0 -8 1 -6.5722 10.5429 3
 0 -8 -1 8.52145 7.86974 1
 0 -8 -1 -8.5736 11.668 3
 0 -8 -1 12.9101 15.3339 3
 0 8 1 -7.7356 14.5706 3
 0 8 -1 14.1151 15.6553 3
 0 8 1 9.45686 12.7182 3
 0 8 -1 -2.429 15.1378 3
 -1 -8 -1 37.6878 11.7168 3
 -1 -8 -1 21.6629 11.8164 3
 1 -8 1 29.5544 11.5153 3
 1 -8 1 27.2969 11.954 3
 -1 -8 -1 15.5949 8.0048 1
 -1 8 -1 43.9595 13.6489 3
 1 8 1 36.1902 16.0422 3
 -1 8 -1 30.4118 16.9873 3
 1 8 1 23.6388 13.2121 3
 -2 -8 -1 -5.2811 11.5709 3
 2 -8 1 -1.7931 17.6107 3
 -2 -8 -1 -2.3896 6.56391 1
 -2 -8 -1 -6.3357 12.1596 3
 2 -8 1 -14.483 11.2898 3
 2 8 1 16.5327 14.8291 3
 2 8 1 -18.651 15.9464 3
 -2 8 -1 17.6975 13.6681 3
 -2 8 -1 8.74775 15.5904 3
 -3 -8 -1 43.6067 13.2647 3
 3 -8 1 28.8432 12.7292 3
 -3 -8 -1 35.8322 11.9826 3
 -3 -8 -1 35.2215 8.10584 1
 3 -8 1 23.2558 11.872 3
 3 8 1 25.0718 16.183 3
 3 8 1 35.6673 7.53679 2
 3 8 1 20.359 13.4681 3
 -3 8 -1 22.1164 14.159 3
 -3 8 -1 21.2678 16.2958 3
 -4 -8 -1 34.2869 12.9274 3
 4 -8 1 1.90431 12.075 3
 -4 -8 -1 20.7991 6.51608 1
 -4 -8 -1 3.29172 15.5625 3
 4 -8 1 44.4114 13.7139 3
 -4 8 -1 34.7741 17.4954 3
 4 8 1 27.4746 17.6246 3
 4 8 1 25.0694 13.6574 3
 -4 8 -1 35.5397 14.2594 3
 4 8 1 26.8564 8.12862 2
 5 -8 1 2.12051 12.7269 3
 -5 -8 -1 -18.954 20.729 3
 -5 -8 -1 -3.9765 12.3787 3
 5 -8 1 3.5785 13.0981 3
 -5 -8 -1 8.75168 5.69203 1
 -5 8 -1 32.101 17.4981 3
 5 8 1 0.16844 16.4373 3
 5 8 1 -9.0604 12.868 3
 -5 8 -1 28.8694 13.3722 3
 5 8 1 -4.7608 8.24704 2
 6 -8 1 -17.984 12.7605 3
 -6 -8 -1 12.753 13.1624 3
 -6 -8 -1 5.15007 5.71721 1
 6 -8 1 -12.806 14.1703 3
 -6 -8 -1 -18.38 22.7008 3
 -6 8 -1 13.6852 15.753 3
 6 8 1 -5.7989 17.5522 3
 6 8 1 -10.888 13.3546 3
 6 8 1 15.891 8.72866 2
 -6 8 -1 -7.3707 17.9284 3
 -7 -8 -1 6.49725 20.7847 3
 -7 -8 -1 7.82087 13.4797 3
 7 -8 1 12.1463 13.8923 3
 7 -8 1 -16.184 14.8255 3
 -7 8 -1 -9.553 14.1612 3
 -7 8 -1 -3.4065 11.0285 1
 7 8 1 2.73018 17.1512 2
 7 8 1 -23.266 14.5168 3
 7 8 1 22.9862 18.4281 3
 -8 -8 -1 -5.641 17.5507 3
 8 -8 1 -17.941 13.8895 3
 8 -8 1 14.2659 17.0253 3
 -8 -8 -1 -5.3078 14.3404 3
 8 8 1 -13.569 15.086 3
 -8 8 -1 3.67222 12.2261 1
 8 8 1 -2.3099 20.2736 3
 -8 8 -1 21.3752 16.2855 3
 3 -9 -1 27.0385 15.738 3
 -3 -9 1 18.0808 14.644 3
 -3 -9 1 34.4566 14.5124 3
 3 -9 -1 34.4597 16.0657 3
 -3 9 1 -13.475 18.4905 3
 3 9 -1 -8.5931 14.8964 3
 -3 9 1 19.8267 20.7026 3
 -2 -9 1 79.0173 16.2531 3
 2 -9 -1 77.5203 16.6629 3
 -2 -9 1 39.9961 16.3843 3
 2 -9 -1 83.2265 16.733 3
 2 9 -1 93.7163 18.0199 3
 -2 9 1 85.9761 21.4641 3
 2 9 -1 58.0305 20.6463 3
 -2 9 1 108.733 19.0235 3
 -1 -9 1 4.3142 15.1202 3
 1 -9 -1 12.3828 14.3217 3
 1 -9 -1 -1.7403 15.0543 3
 -1 -9 1 -8.0517 15.1445 3
 1 9 -1 -12.693 17.6783 3
 -1 9 1 -8.356 18.2677 3
 1 9 -1 -0.3741 15.797 3
 -1 9 1 2.79908 15.4966 3
 0 -9 -1 99.1914 16.5096 3
 0 -9 1 121.871 16.9815 3
 0 -9 1 103.454 16.6286 3
 0 -9 -1 111.816 16.9592 3
 0 9 1 134.066 19.0055 3
 0 9 1 150.437 22.7726 3
 0 9 -1 128.442 18.2564 3
 0 9 -1 101.895 20.9939 3
 1 -9 1 -0.9672 13.5705 3
 -1 -9 -1 -0.6908 13.9339 3
 1 -9 1 2.49506 14.6211 3
 -1 -9 -1 2.3928 15.0571 3
 1 9 1 10.9298 16.3196 3
 1 9 1 39.9446 18.6934 3
 -1 9 -1 -1.0145 19.3773 3
 -1 9 -1 -7.387 16.3356 3
 2 -9 1 63.3637 16.8959 3
 -2 -9 -1 85.6346 16.4946 3
 2 -9 1 19.537 15.8195 3
 -2 -9 -1 54.7871 15.623 3
 2 9 1 -0.221 19.1759 3
 2 9 1 41.2484 15.8537 3
 -2 9 -1 53.1412 17.6056 3
 -2 9 -1 64.1168 21.0673 3
 -3 -9 -1 -16.502 15.2119 3
 3 -9 1 -4.0033 15.4347 3
 -3 -9 -1 -17.252 13.791 3
 3 -9 1 -30.424 13.5786 3
 -3 9 -1 1.59129 16.1545 3
 -3 9 -1 -47.572 19.2443 3
 3 9 1 -5.4657 19.5206 3
 3 9 1 9.33112 16.2279 3
 -17 0 2 57.2834 15.061 3
 -17 0 2 101.416 15.1485 1
 17 0 -2 77.3137 18.0011 3
 17 0 -2 77.6371 14.4217 3
 16 0 -2 -1.4904 14.0357 3
 16 0 -2 16.8659 10.7333 3
 -16 0 2 2.67398 10.927 3
 -16 0 2 13.502 12.0019 1
 -16 0 2 -14.281 13.0846 3
 15 0 -2 49.1579 14.0823 3
 -15 0 2 33.916 10.5745 3
 -15 0 2 57.8495 13.569 3
 -15 0 2 46.1978 11.9164 1
 15 0 -2 27.5276 10.2667 3
 -14 0 2 371.222 21.5594 1
 14 0 -2 345.262 22.9602 3
 -14 0 2 362.837 19.4915 3
 14 0 -2 363.029 20.5083 3
 -14 0 2 347.513 23.037 3
 -13 0 2 107.45 11.286 3
 13 0 -2 107.388 13.3528 3
 -13 0 2 110.876 15.2591 1
 -13 0 2 91.8813 12.9537 3
 13 0 -2 107.807 11.6183 3
 -12 0 2 11.6042 7.1749 3
 -12 0 2 16.1277 11.2613 1
 -12 0 2 11.3595 9.30924 3
 12 0 -2 13.5343 7.71686 3
 12 0 -2 11.9714 9.76594 3
 11 0 -2 673.912 25.2485 3
 -11 0 2 667.017 23.0903 3
 -11 0 2 650.344 24.7284 3
 11 0 -2 632.592 22.7448 3
 -11 0 2 655.394 23.4498 1
 -10 0 2 35.8236 6.96492 3
 -10 0 2 25.3362 8.36546 3
 10 0 -2 44.2661 8.76025 3
 10 0 -2 39.2195 7.07657 3
 -10 0 2 33.6085 7.34012 1
 9 0 -2 346.711 14.7881 3
 -9 0 2 362.426 15.2664 1
 -9 0 2 341.028 16.5969 3
 9 0 -2 396.917 16.9986 3
 -9 0 2 366.667 14.6674 3
 -8 0 2 195.744 12.7974 3
 8 0 -2 168.263 10.6802 3
 8 0 -2 185.115 12.5333 3
 -8 0 2 170.344 10.5622 3
 -8 0 2 165.007 10.7795 1
 -7 0 2 536.676 17.5428 1
 -7 0 2 536.274 18.6084 3
 7 0 -2 525.951 16.9631 3
 7 0 -2 542.884 18.5154 3
 -7 0 2 539.26 17.0042 3
 -6 0 2 731.298 20.7263 1
 6 0 -2 721.689 21.3307 3
 -6 0 2 717.779 20.1837 3
 6 0 -2 699.151 20.1279 3
 -5 0 2 38.3317 5.11924 1
 -5 0 2 28.3519 4.44309 3
 5 0 -2 29.1943 5.53787 3
 5 0 -2 35.562 4.60471 3
 -4 0 2 1174.55 28.747 1
 4 0 -2 1139.94 29.3409 3
 -4 0 2 1123.69 28.319 3
 4 0 -2 1131.23 28.3655 3
 3 0 -2 1402.36 34.0422 3
 3 0 -2 1423.91 34.4659 1
 -3 0 2 1430.44 34.0592 3
 -3 0 2 1455.82 34.5248 1
 -2 0 2 6990.15 148.41 1
 -2 0 2 6214.2 145.917 3
 2 0 -2 6189.91 146.211 3
 2 0 -2 6346.38 146.099 3
 -2 0 2 5825.72 145.765 3
 2 0 -2 6633.2 148.391 1
 -1 0 -2 971.663 24.6326 3
 1 0 2 1027.96 24.2384 3
 2 0 2 3973.54 92.5892 3
 -2 0 -2 3985.55 92.9852 3
 2 0 2 4019.46 92.9715 3
 3 0 2 3664.79 89.0819 3
 -3 0 -2 3901.34 89.8258 3
 3 0 2 3969.01 89.8584 3
 -3 0 -2 3723.67 89.1286 3
 4 0 2 5080.29 116.091 3
 -4 0 -2 4985.37 116.128 3
 -4 0 -2 4954.83 115.392 3
 4 0 2 4761.98 115.27 3
 -5 0 -2 44.2333 5.96626 3
 5 0 2 41.3441 5.70599 3
 5 0 2 39.1196 6.7112 3
 -5 0 -2 38.2108 6.63768 3
 -6 0 -2 274.148 14.418 3
 6 0 2 249.928 12.1067 3
 6 0 2 283.527 14.0765 3
 -6 0 -2 270.226 12.3139 3
 7 0 2 692.675 22.7147 3
 -7 0 -2 681.644 22.9034 3
 -7 0 -2 686.669 21.2523 3
 7 0 2 658.28 21.042 3
 -8 0 -2 4.08685 7.02133 3
 8 0 2 -0.3141 7.04305 3
 8 0 2 2.27188 5.45828 3
 -8 0 -2 1.22857 5.5914 3
 -9 0 -2 844.829 28.4424 3
 -9 0 -2 874.313 26.5589 3
 9 0 2 870.343 28.2093 3
 9 0 2 834.6 26.3871 3
 10 0 2 84.4066 10.7761 3
 -10 0 -2 57.6783 10.1393 3
 -10 0 -2 80.6848 9.05593 3
 10 0 2 70.6128 8.72963 3
 11 0 2 320.666 17.5832 3
 -11 0 -2 363.661 18.8872 3
 11 0 2 363.161 21.1108 3
 -11 0 -2 345.48 20.3667 3
 12 0 2 1487.39 45.0716 3
 -12 0 -2 1523.38 42.9197 3
 12 0 2 1448.86 42.6782 3
 -12 0 -2 1371.02 44.242 3
 -12 0 -2 1541.61 43.276 1
 -13 0 -2 67.4903 11.7029 1
 -13 0 -2 52.0341 12.9814 3
 -13 0 -2 89.1519 11.3643 3
 13 0 2 80.6188 13.7404 3
 13 0 2 70.3084 10.8052 3
 14 0 2 9.01011 12.563 3
 -14 0 -2 -0.2602 9.83104 3
 -14 0 -2 2.67857 12.2717 3
 14 0 2 11.2193 10.4407 3
 -14 0 -2 -17.565 9.17323 1
 -15 0 -2 111.181 14.6238 1
 15 0 2 82.9401 13.4114 3
 -15 0 -2 144.028 19.0214 3
 -15 0 -2 118.724 16.6813 3
 15 0 2 125.28 17.0751 3
 16 0 2 13.9398 12.1308 3
 -16 0 -2 2.12719 11.833 1
 16 0 2 -15.897 14.0298 3
 -16 0 -2 -7.7708 15.0444 3
 -16 0 -2 3.01889 12.3701 3
 16 -1 -2 9.89606 10.8936 3
 -16 -1 2 6.05646 11.1564 1
 -16 -1 2 19.9786 12.1386 3
 16 -1 -2 -19.43 13.5464 3
 -16 -1 2 51.9805 14.7681 3
 16 1 -2 -5.9692 10.9554 3
 -16 1 2 7.1404 11.399 1
 16 1 -2 15.1509 14.1362 3
 -16 1 2 -23.411 10.3175 3
 -16 1 2 -11.593 14.2444 3
 -15 -1 2 33.6039 11.5415 3
 -15 -1 2 36.7654 11.187 1
 15 -1 -2 39.0116 11.3058 3
 15 -1 -2 50.1094 14.2099 3
 -15 -1 2 21.8843 12.1968 3
 15 1 -2 51.1622 14.8018 3
 -15 1 2 38.6245 10.6497 3
 -15 1 2 18.6702 12.6288 3
 -15 1 2 50.1312 11.2322 1
 15 1 -2 42.6068 11.3668 3
 14 -1 -2 7.75577 9.38383 3
 -14 -1 2 24.7355 9.81806 1
 -14 -1 2 0.83211 11.8751 3
 -14 -1 2 22.5015 9.90609 3
 14 -1 -2 24.9823 11.7556 3
 14 1 -2 19.7178 11.4896 3
 -14 1 2 26.0938 11.9515 3
 14 1 -2 24.8485 10.1696 3
 -14 1 2 5.55798 8.80792 3
 -14 1 2 17.8012 10.1422 1
 -13 -1 2 203.293 20.4228 3
 -13 -1 2 250.736 16.6256 1
 -13 -1 2 210.963 16.3906 3
 13 -1 -2 194.679 16.7926 3
 13 -1 -2 232.675 19.6476 3
 -13 1 2 207.704 16.0228 3
 13 1 -2 170.381 16.2822 3
 -13 1 2 201.537 17.6717 1
 -13 1 2 197.754 18.9974 3
 13 1 -2 181.391 19.9795 3
 12 -1 -2 8.97221 9.67458 3
 12 -1 -2 7.57705 7.59187 3
 -12 -1 2 3.62208 7.44796 1
 -12 -1 2 -3.0654 7.11547 3
 -12 -1 2 15.4278 9.99646 3
 -12 1 2 -4.6729 6.97861 3
 -12 1 2 -0.9803 7.85204 1
 -12 1 2 12.7736 9.15917 3
 12 1 -2 -3.6557 9.38585 3
 12 1 -2 3.49501 7.66396 3
 -11 -1 2 276.062 18.1939 3
 -11 -1 2 291.459 15.8396 1
 11 -1 -2 282.176 17.7691 3
 11 -1 -2 299.382 15.7097 3
 -11 -1 2 230.18 23.7795 3
 11 1 -2 297.446 16.1464 3
 11 1 -2 308.951 18.2879 3
 -11 1 2 302.526 18.2674 3
 -11 1 2 308.315 16.9607 1
 -10 -1 2 235.529 15.9793 3
 10 -1 -2 260.987 13.915 3
 -10 -1 2 237.158 13.6437 1
 -10 -1 2 276.065 14.3923 3
 10 -1 -2 269.158 16.0664 3
 10 1 -2 261.419 14.3741 3
 -10 1 2 272.617 13.5902 3
 10 1 -2 276.303 16.5761 3
 -10 1 2 248.526 15.9978 3
 -10 1 2 229.265 14.9562 1
 -9 -1 2 37.3342 6.70376 1
 9 -1 -2 43.8227 7.95468 3
 -9 -1 2 42.8346 8.27707 3
 -9 -1 2 44.966 6.9033 3
 9 -1 -2 52.0111 7.08816 3
 -9 1 2 44.9603 8.34685 3
 -9 1 2 46.3728 6.67744 3
 -9 1 2 49.9473 7.76338 1
 9 1 -2 44.9565 6.91467 3
 9 1 -2 54.1365 8.68962 3
 -8 -1 2 161.911 10.7218 1
 -8 -1 2 218.459 13.498 3
 8 -1 -2 209.023 12.9164 3
 -8 -1 2 193.678 11.6404 3
 8 -1 -2 187.343 11.5359 3
 -8 1 2 226.472 13.3376 3
 8 1 -2 193.074 11.3281 3
 -8 1 2 195.554 10.8974 3
 -8 1 2 164.385 11.8387 1
 8 1 -2 229.338 13.3669 3
 -7 -1 2 90.9177 8.5462 1
 7 -1 -2 115.668 10.6211 3
 -7 -1 2 103.489 11.0141 3
 7 -1 -2 101.716 8.99591 3
 -7 -1 2 111.211 9.09867 3
 7 1 -2 126.764 11.0069 3
 -7 1 2 119.171 8.67835 3
 -7 1 2 98.2928 9.58345 1
 7 1 -2 106.736 9.11092 3
 -7 1 2 109.739 11.0505 3
 -6 -1 2 235.621 10.5255 3
 6 -1 -2 246.592 12.1051 3
 6 -1 -2 219.444 10.2829 3
 -6 1 2 214.001 10.1733 3
 -6 1 2 252.185 14.1295 3
 -6 1 2 209.586 11.4218 1
 6 1 -2 283.729 12.6288 3
 6 1 -2 211.464 10.4017 3
 -5 -1 2 392.831 14.3885 3
 5 -1 -2 412.213 13.8161 3
 5 -1 -2 385.776 12.6474 3
 -5 -1 2 396.047 12.8329 3
 -5 1 2 388.504 12.5339 3
 -5 1 2 413.76 13.896 1
 5 1 -2 406.554 14.227 3
 5 1 -2 414.597 13.0783 3
 4 -1 -2 298.983 10.7879 3
 4 -1 -2 275.663 9.73395 3
 4 -1 -2 270.591 10.8787 1
 -4 -1 2 291.952 10.0987 3
 4 1 -2 316.855 11.6945 3
 4 1 -2 278.582 10.1491 3
 -4 1 2 272.669 9.67614 3
 3 -1 -2 3799.81 88.988 3
 3 -1 -2 3693.27 88.6969 3
 3 -1 -2 3918.73 89.5305 1
 -3 -1 2 3794.81 88.9314 3
 3 1 -2 3761.88 88.9327 3
 -3 1 2 3702.21 88.6658 3
 3 1 -2 3828.06 89.3816 3
 -3 1 2 4157.85 89.6486 1
 -2 -1 2 129.273 4.79288 1
 2 -1 -2 122.865 5.99594 3
 -2 1 2 145.607 6.96853 1
 -2 1 2 134.276 5.98948 3
 1 -1 -2 21.9384 4.36381 1
 -1 -1 2 17.1851 3.04356 3
 -1 -1 2 15.677 3.00631 3
 1 -1 -2 14.0162 2.87528 3
 1 -1 -2 19.9169 3.67803 3
 1 1 -2 15.7617 2.95411 2
 1 1 -2 7.86887 3.49528 3
 -1 1 2 23.6432 4.3408 1
 1 1 -2 11.247 3.06564 3
 0 -1 2 15.1913 2.68505 2
 0 -1 2 13.5478 2.88883 3
 0 -1 -2 12.9007 2.72383 3
 0 -1 -2 12.3809 3.47089 3
 0 -1 2 14.6736 2.93319 3
 0 1 -2 13.059 2.7101 3
 0 1 -2 15.9288 2.77411 2
 0 1 2 15.4078 2.90162 3
 0 1 -2 16.4994 3.11499 3
 0 1 2 13.1921 3.55614 3
 1 -1 2 1108.67 26.6712 3
 -1 -1 -2 1067.87 26.6874 3
 -1 -1 -2 1055.57 27.2796 3
 1 -1 2 1099.82 26.9922 3
 1 1 2 1124.97 27.3926 3
 -1 1 -2 1084.22 27.0014 3
 -1 1 -2 1124.2 26.6491 3
 -2 -1 -2 84.9108 8.48006 3
 2 -1 2 90.3661 7.64524 3
 2 -1 2 80.6616 6.66097 3
 -2 -1 -2 89.2574 6.71834 3
 2 1 2 80.5555 8.25391 3
 -2 1 -2 92.9138 6.60465 3
 2 1 2 91.1604 6.92012 3
 -2 1 -2 93.2124 7.81494 3
 3 -1 2 849.683 22.9351 3
 -3 -1 -2 840.017 23.3745 3
 -3 -1 -2 856.986 22.3592 3
 3 -1 2 819.014 22.0821 3
 3 1 2 829.11 22.2809 3
 3 1 2 849.259 23.2421 3
 -3 1 -2 852.767 22.1516 3
 -3 1 -2 841.148 23.0855 3
 4 -1 2 669.95 19.8228 3
 -4 -1 -2 707.347 20.151 3
 4 -1 2 737.879 21.0681 3
 -4 -1 -2 724.191 21.5696 3
 -4 1 -2 722.835 21.0461 3
 -4 1 -2 717.997 20.0589 3
 4 1 2 707.503 20.2462 3
 4 1 2 755.654 21.4756 3
 5 -1 2 375.898 14.7799 3
 -5 -1 -2 380.955 15.6181 3
 5 -1 2 357.69 13.4283 3
 -5 -1 -2 389.045 13.7278 3
 -5 1 -2 369.213 13.5314 3
 -5 1 -2 371.883 14.6729 3
 5 1 2 372.995 13.7833 3
 5 1 2 385.356 15.2369 3
 -6 -1 -2 447.2 17.9364 3
 6 -1 2 433.025 15.5923 3
 -6 -1 -2 449.044 15.9008 3
 6 -1 2 448.838 17.4686 3
 -6 1 -2 439.289 15.5981 3
 -6 1 -2 411.961 16.7296 3
 6 1 2 444.841 16.0473 3
 6 1 2 475.114 17.647 3
 7 -1 2 -2.2074 5.39311 3
 -7 -1 -2 -8.4043 6.58086 3
 7 -1 2 -4.7478 6.35263 3
 -7 -1 -2 -6.2756 5.4594 3
 7 1 2 2.16481 6.72555 3
 -7 1 -2 -1.2762 5.08773 3
 -7 1 -2 -6.1698 6.51409 3
 7 1 2 -2.0001 5.2302 3
 8 -1 2 145.071 11.8474 3
 -8 -1 -2 152.263 12.0999 3
 -8 -1 -2 155.399 14.3712 3
 8 -1 2 161.914 13.9673 3
 8 1 2 159.248 13.6779 3
 8 1 2 134.289 11.4953 3
 -8 1 -2 149.975 11.2328 3
 -8 1 -2 151.609 14.2149 3
 9 -1 2 65.1415 9.65553 3
 -9 -1 -2 60.9929 8.27097 3
 -9 -1 -2 69.1894 10.1728 3
 9 -1 2 58.9788 7.92281 3
 9 1 2 55.0458 9.3908 3
 -9 1 -2 64.7648 7.87442 3
 -9 1 -2 59.4303 9.28666 3
 9 1 2 61.7662 8.29121 3
 10 -1 2 348.734 17.0633 3
 -10 -1 -2 366.769 17.5252 3
 -10 -1 -2 368.663 20.1215 3
 10 -1 2 370.773 19.6883 3
 -10 1 -2 345.661 17.0101 3
 10 1 2 368.134 17.7477 3
 -10 1 -2 344.477 19.2311 3
 -10 1 -2 371.14 17.2739 1
 10 1 2 363.129 19.8393 3
 -11 -1 -2 465.469 23.2047 3
 11 -1 2 443.941 19.7561 3
 11 -1 2 457.801 22.4893 3
 -11 -1 -2 438.849 24.7982 3
 11 1 2 439.827 22.5301 3
 11 1 2 421.696 20.0413 3
 -11 1 -2 409.003 30.4985 3
 -11 1 -2 436.835 22.3546 3
 12 -1 2 131.278 15.1793 3
 -12 -1 -2 132.404 15.8308 3
 -12 -1 -2 111.759 14.2051 3
 12 -1 2 146.257 18.556 3
 -12 1 -2 105.709 15.3654 1
 -12 1 -2 87.2206 13.2271 3
 -12 1 -2 133.071 15.6254 3
 12 1 2 108.402 14.2319 3
 12 1 2 117.183 15.855 3
 13 -1 2 22.7933 12.0271 3
 -13 -1 -2 29.6996 12.0799 3
 13 -1 2 31.7585 10.1576 3
 -13 -1 -2 24.4686 9.63195 1
 -13 -1 -2 18.3959 9.42032 3
 -13 1 -2 25.5365 10.3007 1
 -13 1 -2 38.8029 10.0828 3
 -13 1 -2 20.8507 11.8383 3
 13 1 2 10.1026 12.4073 3
 13 1 2 25.3016 9.25089 3
 14 -1 2 36.1232 11.2256 3
 -14 -1 -2 13.8826 10.5031 1
 14 -1 2 13.7116 13.0146 3
 -14 -1 -2 11.7993 12.7868 3
 -14 -1 -2 16.7504 10.8769 3
 -14 1 -2 21.8678 12.9305 3
 -14 1 -2 22.2231 10.8118 1
 -14 1 -2 4.79523 9.95361 3
 14 1 2 16.0873 10.1631 3
 14 1 2 12.6645 13.0673 3
 -15 -1 -2 73.8885 16.4674 3
 -15 -1 -2 40.3325 12.8995 3
 15 -1 2 65.0798 15.6545 3
 15 -1 2 71.1015 12.7999 3
 -15 -1 -2 56.3883 12.9965 1
 15 1 2 65.5565 16.6785 3
 15 1 2 79.199 12.8055 3
 -15 1 -2 133.315 19.5174 1
 -15 1 -2 82.1361 13.4423 3
 -15 1 -2 60.2522 15.028 3
 -16 -1 -2 12.3355 12.3925 1
 -16 -1 -2 -28.896 15.5857 3
 16 -1 2 7.90167 12.3068 3
 16 -1 2 13.3262 16.3541 3
 -16 -1 -2 13.7453 13.0318 3
 -16 1 -2 24.089 13.1366 3
 -16 1 -2 37.9819 15.7554 3
 16 1 2 -12.165 12.141 3
 16 1 2 27.4619 16.7483 3
 -16 1 -2 5.83907 13.2473 1
 -16 -2 2 5.97838 11.4178 1
 16 -2 -2 41.1465 15.5134 3
 -16 -2 2 29.3955 16.6785 3
 16 -2 -2 -4.2467 12.1984 3
 -16 2 2 -1.2617 12.684 1
 16 2 -2 -5.562 14.8752 3
 -16 2 2 -19.026 11.4971 3
 -16 2 2 6.50398 15.1759 3
 16 2 -2 -4.3343 11.4111 3
 15 -2 -2 114.629 13.6421 3
 -15 -2 2 147.693 17.4865 3
 -15 -2 2 115.913 13.9761 3
 15 -2 -2 140.129 17.1087 3
 -15 -2 2 134.618 17.7413 1
 -15 2 2 132.445 16.1799 3
 -15 2 2 104.829 12.9455 3
 -15 2 2 109.239 14.1265 1
 15 2 -2 116.526 17.1938 3
 15 2 -2 151.89 19.1967 3
 -14 -2 2 73.6338 14.3879 3
 14 -2 -2 40.296 12.5878 3
 14 -2 -2 44.3532 10.7374 3
 -14 -2 2 45.2232 10.4728 3
 -14 -2 2 41.3319 9.72167 1
 -14 2 2 29.1135 9.87765 3
 -14 2 2 20.8657 12.5666 3
 -14 2 2 51.5029 11.3375 1
 14 2 -2 30.0553 12.7103 3
 14 2 -2 46.2227 11.254 3
 13 -2 -2 187.735 18.9149 3
 -13 -2 2 183.885 17.4698 3
 13 -2 -2 153.357 15.6026 3
 -13 -2 2 143.061 17.6275 1
 -13 -2 2 149.809 20.5784 3
 -13 2 2 159.156 15.6276 3
 -13 2 2 141.309 18.7244 3
 -13 2 2 158.776 16.7174 1
 13 2 -2 133.02 17.0473 3
 13 2 -2 158.492 15.9267 3
 12 -2 -2 43.4655 9.44136 3
 -12 -2 2 40.9614 9.58124 3
 12 -2 -2 46.6102 10.9359 3
 -12 -2 2 46.6765 11.48 3
 -12 -2 2 55.4402 9.00521 1
 -12 2 2 46.9727 9.11245 1
 -12 2 2 38.9749 11.0207 3
 -12 2 2 54.8293 9.3021 3
 12 2 -2 49.0125 9.7052 3
 12 2 -2 57.1539 11.8454 3
 11 -2 -2 67.4857 10.5352 3
 -11 -2 2 38.9073 8.68127 3
 -11 -2 2 46.3306 10.8535 3
 -11 -2 2 51.783 8.14894 1
 11 -2 -2 30.4471 14.6231 3
 -11 2 2 49.0214 10.5444 3
 11 2 -2 39.8763 10.3366 3
 11 2 -2 42.288 10.3021 3
 -11 2 2 40.5356 8.79955 1
 -11 2 2 57.1766 8.48961 3
 -10 -2 2 109.349 11.0318 1
 -10 -2 2 93.9843 11.3097 3
 10 -2 -2 107.942 12.145 3
 10 -2 -2 109.273 13.9077 3
 -10 -2 2 101.877 12.0024 3
 -10 2 2 113.921 11.3399 3
 -10 2 2 106.097 14.5541 3
 -10 2 2 97.3061 12.5282 1
 10 2 -2 98.4928 12.3566 3
 10 2 -2 99.1511 11.7064 3
 9 -2 -2 167.494 13.6579 3
 -9 -2 2 148.478 11.8634 3
 -9 -2 2 155.349 14.578 3
 -9 -2 2 133.616 10.3755 1
 9 -2 -2 145.665 11.6379 3
 9 2 -2 151.489 12.106 3
 -9 2 2 154.53 13.232 3
 -9 2 2 147.958 12.2765 1
 9 2 -2 162.135 14.4031 3
 -9 2 2 160.011 10.931 3
 8 -2 -2 278.057 13.2341 3
 8 -2 -2 302.718 14.6035 3
 -8 -2 2 320.958 13.7376 3
 -8 -2 2 269.063 15.475 3
 -8 2 2 291.405 13.9736 1
 -8 2 2 271.234 12.6501 3
 8 2 -2 291.149 15.5819 3
 -8 2 2 290.806 14.6165 3
 8 2 -2 289.976 13.4823 3
 -7 -2 2 268.548 14.4797 3
 7 -2 -2 276.562 13.1628 3
 7 -2 -2 256.364 11.781 3
 -7 -2 2 256.036 12.1702 3
 7 2 -2 272.188 14.3146 3
 -7 2 2 248.714 12.648 1
 -7 2 2 256.74 11.4995 3
 7 2 -2 243.343 12.2115 3
 -7 2 2 277.621 13.6373 3
 6 -2 -2 1510.43 38.9478 3
 -6 -2 2 1564.94 40.1508 3
 -6 -2 2 1576.99 38.8332 3
 6 -2 -2 1423.1 38.1277 3
 6 2 -2 1469.7 38.6221 3
 -6 2 2 1485.3 38.1664 3
 6 2 -2 1566.19 40.0213 3
 -6 2 2 1509.01 39.1942 3
 -6 2 2 1515.19 39.2547 1
 5 -2 -2 136.402 9.79656 1
 -5 -2 2 155.971 11.6429 3
 5 -2 -2 153.164 9.70952 3
 5 -2 -2 135.392 8.57656 3
 -5 -2 2 153.061 9.11777 3
 -5 2 2 136.771 8.59188 3
 5 2 -2 153.468 11.6836 3
 -5 2 2 123.157 9.37417 1
 5 2 -2 131.306 9.05794 3
 -5 2 2 170.217 10.1402 3
 4 -2 -2 3120.49 74.3464 3
 -4 -2 2 3133.3 74.6287 3
 4 -2 -2 3144.09 74.8273 3
 -4 -2 2 3141.11 75.623 3
 4 -2 -2 3146.25 74.9965 1
 4 2 -2 3147.15 74.6947 3
 4 2 -2 3195.28 75.6509 3
 -4 2 2 3249.46 75.0657 1
 -4 2 2 3131.65 74.2505 3
 -4 2 2 3084.73 74.7741 3
 3 -2 -2 263.387 10.3967 3
 3 -2 -2 286.771 10.9449 1
 -3 -2 2 293.787 10.8008 3
 3 -2 -2 276.231 11.3527 3
 -3 -2 2 298.71 12.8874 3
 -3 2 2 272.073 10.3099 3
 3 2 -2 327.51 12.7937 3
 -3 2 2 290.597 10.8866 1
 -3 2 2 268.997 11.4637 3
 3 2 -2 291.097 11.3339 3
 2 -2 -2 8671.89 204.603 3
 -2 -2 2 9070.03 205.74 3
 2 -2 -2 8706.65 204.753 1
 2 -2 -2 8846.84 204.976 3
 -2 -2 2 9030.92 205 3
 -2 2 2 8724.06 204.585 3
 -2 2 2 8989.7 204.793 1
 2 2 -2 9285.71 205.704 3
 -2 2 2 8796.73 204.977 3
 2 2 -2 8988.46 205.051 3
 1 -2 -2 2742 66.6627 3
 1 -2 -2 2896.21 66.2991 1
 1 -2 -2 2822.46 66.3806 3
 -1 -2 2 2864.02 66.838 3
 -1 -2 2 2933.58 66.5659 3
 -1 2 2 2795.69 67.3818 3
 1 2 -2 2785.22 65.8997 2
 -1 2 2 2770.11 66.7406 3
 -1 2 2 2833.59 66.1824 1
 1 2 -2 2790.02 66.795 3
 1 2 -2 2858.46 67.5694 3
 0 -2 -2 408.201 14.2627 3
 0 -2 2 398.872 12.9061 3
 0 -2 2 385.653 12.2189 3
 0 -2 2 387.874 11.1027 2
 0 -2 -2 393.336 12.6912 3
 0 2 2 413.228 14.1983 3
 0 2 2 381.548 12.7232 3
 0 2 -2 380.24 12.8311 3
 0 2 -2 380.14 10.2678 1
 0 2 -2 386.617 12.0777 3
 0 2 -2 362.246 11.1653 2
 1 -2 2 102.922 5.95787 2
 1 -2 2 101.763 8.30906 3
 -1 -2 -2 111.041 9.94177 3
 -1 -2 -2 104.006 7.73773 3
 1 -2 2 107.614 7.5086 3
 -1 2 -2 102.269 8.76893 3
 1 2 2 120.471 9.94395 3
 -1 2 -2 108.888 5.96682 1
 -1 2 -2 103.846 7.45124 3
 1 2 2 109.951 8.08459 3
 2 -2 2 188.121 9.1768 3
 -2 -2 -2 191.944 9.41905 3
 2 -2 2 198.461 10.2332 3
 -2 -2 -2 209.416 11.3698 3
 -2 2 -2 204.719 9.11193 3
 2 2 2 227.461 11.7176 3
 2 2 2 191.861 9.5135 3
 -2 2 -2 195.961 10.1253 3
 -2 2 -2 175.718 8.23236 1
 -3 -2 -2 2.67185 4.13767 3
 3 -2 2 -0.2635 4.6303 3
 -3 -2 -2 0.90304 5.39977 3
 3 -2 2 2.95579 4.34848 3
 3 2 2 1.05588 5.67924 3
 -3 2 -2 8.47203 4.98986 3
 -3 2 -2 1.81192 3.9584 1
 -3 2 -2 -3.4801 4.10012 3
 3 2 2 3.73725 4.46731 3
 -4 -2 -2 293.556 11.9182 3
 4 -2 2 285.14 12.7972 3
 -4 -2 -2 284.841 13.9873 3
 4 -2 2 287.599 11.7691 3
 4 2 2 295.917 12.0886 3
 4 2 2 285.524 13.5247 3
 -4 2 -2 291.28 12.8059 3
 -4 2 -2 290.802 11.65 1
 -4 2 -2 286.517 11.6525 3
 -5 -2 -2 1559.48 41.9452 3
 -5 -2 -2 1617.37 40.5377 3
 5 -2 2 1508.75 40.001 3
 5 -2 2 1583.14 41.0325 3
 -5 2 -2 1566.13 40.1277 3
 5 2 2 1650.92 41.9698 3
 -5 2 -2 1602.78 40.4741 1
 5 2 2 1562.9 40.5161 3
 -5 2 -2 1570.78 41.1418 3
 -6 -2 -2 234.973 14.5124 3
 -6 -2 -2 237.257 12.1806 3
 6 -2 2 220.121 11.8884 3
 6 -2 2 245.251 13.7218 3
 6 2 2 238.341 12.3385 3
 -6 2 -2 228.101 11.7407 3
 -6 2 -2 230.189 13.563 3
 6 2 2 263.996 14.2225 3
 -6 2 -2 236.017 12.1738 1
 7 -2 2 302.961 15.432 3
 7 -2 2 267.243 13.3585 3
 -7 -2 -2 277.951 13.5612 3
 -7 -2 -2 272.998 15.8247 3
 -7 2 -2 256.141 13.4425 1
 -7 2 -2 268.621 15.1999 3
 7 2 2 266.883 13.5715 3
 7 2 2 283.666 16.0701 3
 -7 2 -2 263.803 13.087 3
 -8 -2 -2 472.352 20.4286 3
 8 -2 2 478.122 19.8284 3
 -8 -2 -2 457.569 17.6589 3
 8 -2 2 432.5 17.5715 3
 -8 2 -2 439.031 17.5662 1
 8 2 2 444.055 18.0159 3
 8 2 2 452.014 19.8556 3
 -8 2 -2 458.718 19.3716 3
 -8 2 -2 449.493 17.4522 3
 9 -2 2 193.026 14.0099 3
 -9 -2 -2 179.369 16.668 3
 -9 -2 -2 185.353 14.0079 3
 9 -2 2 186.571 16.3969 3
 -9 2 -2 181.845 13.458 1
 -9 2 -2 164.125 15.1019 3
 9 2 2 174.856 13.8478 3
 9 2 2 222.605 16.9644 3
 -9 2 -2 190.324 13.4556 3
 10 -2 2 33.4351 10.3312 3
 -10 -2 -2 29.2935 10.3881 3
 -10 -2 -2 23.69 8.43098 3
 10 -2 2 11.8531 8.20297 3
 10 2 2 31.7019 10.2361 3
 -10 2 -2 21.2668 8.44947 1
 -10 2 -2 34.8489 9.8329 3
 -10 2 -2 31.3616 7.7161 3
 10 2 2 16.7388 8.21086 3
 11 -2 2 382.158 24.4752 3
 -11 -2 -2 381.793 23.4136 3
 -11 -2 -2 417.198 20.8102 3
 11 -2 2 438.741 23.6357 3
 -11 2 -2 430.399 23.3583 3
 11 2 2 416.349 20.6441 3
 11 2 2 435.231 23.835 3
 -11 2 -2 435.16 20.2901 1
 -11 2 -2 431.669 19.865 3
 12 -2 2 86.4501 11.7175 3
 -12 -2 -2 112.911 15.6993 3
 -12 -2 -2 120.649 15.011 3
 12 -2 2 106.937 14.2566 3
 -12 2 -2 125.725 15.6003 1
 -12 2 -2 131.767 15.5947 3
 -12 2 -2 108.11 13.9692 3
 12 2 2 107.786 14.1544 3
 12 2 2 105.427 11.985 3
 -13 -2 -2 7.26486 12.3284 3
 -13 -2 -2 15.2073 10.6508 3
 13 -2 2 14.1775 12.3396 3
 13 -2 2 6.71058 9.48489 3
 -13 2 -2 -23.204 11.5699 3
 13 2 2 2.27084 9.32533 3
 -13 2 -2 17.2852 10.0366 1
 -13 2 -2 5.53963 9.17716 3
 13 2 2 -9.675 11.283 3
 14 -2 2 11.4227 13.2867 3
 -14 -2 -2 13.0384 11.4099 3
 14 -2 2 -18.36 9.46367 3
 -14 -2 -2 -12.443 9.73203 1
 -14 -2 -2 -5.724 13.2212 3
 -14 2 -2 14.8902 12.8831 3
 -14 2 -2 30.0633 10.9234 3
 -14 2 -2 11.0083 9.30923 1
 14 2 2 7.99098 13.5516 3
 14 2 2 5.77112 10.2336 3
 15 -2 2 50.5857 14.9601 3
 15 -2 2 27.4877 11.7936 3
 -15 -2 -2 38.6606 12.5534 3
 -15 -2 -2 25.3694 11.301 1
 -15 -2 -2 21.9573 15.9389 3
 15 2 2 30.018 12.1649 3
 -15 2 -2 16.0822 14.3903 3
 15 2 2 31.7523 15.776 3
 -15 2 -2 35.1833 12.2946 1
 -15 2 -2 52.7355 12.8209 3
 -16 -2 -2 2.43239 14.0406 3
 16 -2 2 -2.2343 15.2512 3
 -16 -2 -2 -34.888 17.4103 3
 16 -2 2 2.49799 13.6202 3
 -16 -2 -2 12.259 11.6837 1
 -16 2 -2 5.31631 17.3554 3
 16 2 2 -15.912 12.4529 3
 16 2 2 -3.9146 16.2899 3
 -16 2 -2 -7.2445 13.7448 1
 -16 2 -2 3.48753 13.8809 3
 -16 -3 2 154.109 19.2754 3
 16 -3 -2 180.158 23.016 3
 -16 -3 2 248.69 27.9963 3
 16 -3 -2 164.792 20.7487 3
 -16 -3 2 180.251 20.9358 1
 16 3 -2 143.751 20.5182 3
 16 3 -2 186.436 24.5246 3
 -16 3 2 165.7 19.685 3
 -16 3 2 158.715 19.2149 3
 15 -3 -2 77.8308 13.7696 3
 -15 -3 2 101.847 17.2699 3
 -15 -3 2 71.8338 14.2529 3
 15 -3 -2 80.2227 15.7244 3
 -15 3 2 128.245 16.1862 1
 -15 3 2 81.4273 16.1702 3
 15 3 -2 91.053 17.7442 3
 -15 3 2 106.311 13.9555 3
 15 3 -2 118.377 15.0174 3
 14 -3 -2 105.984 13.6343 3
 -14 -3 2 140.846 15.6823 1
 -14 -3 2 92.0252 13.9335 3
 -14 -3 2 118.898 16.9893 3
 14 -3 -2 128.506 15.9025 3
 -14 3 2 90.3524 15.493 3
 14 3 -2 112.914 13.5697 3
 -14 3 2 141.269 19.215 1
 -14 3 2 110.568 13.3125 3
 14 3 -2 124.032 17.4764 3
 -13 -3 2 5.58289 7.73026 1
 13 -3 -2 -2.4688 10.2044 3
 13 -3 -2 5.34557 10.656 3
 -13 -3 2 -9.3071 9.46825 3
 -13 -3 2 12.1364 12.5495 3
 -13 3 2 11.6617 9.75105 1
 -13 3 2 0.29815 11.5816 3
 13 3 -2 15.0599 10.0332 3
 13 3 -2 9.0547 11.9274 3
 -13 3 2 12.008 9.35862 3
 -12 -3 2 4.92277 7.55669 1
 -12 -3 2 -5.0764 8.42694 3
 12 -3 -2 3.96696 9.97724 3
 -12 -3 2 7.21724 11.5501 3
 12 -3 -2 13.7271 9.79737 3
 12 3 -2 14.1312 9.03031 3
 -12 3 2 3.54946 11.0187 3
 12 3 -2 20.2911 11.8948 3
 -12 3 2 -4.9945 7.66475 3
 -12 3 2 2.82407 8.78235 1
 -11 -3 2 14.7583 8.43534 3
 11 -3 -2 10.4409 8.54875 3
 -11 -3 2 28.0177 7.48972 1
 -11 -3 2 21.2188 10.6294 3
 11 -3 -2 28.1915 9.61695 3
 11 3 -2 28.772 10.7797 3
 -11 3 2 20.0061 9.1585 1
 -11 3 2 32.1265 10.3119 3
 11 3 -2 23.3221 8.20117 3
 -11 3 2 18.4138 7.9717 3
 -10 -3 2 14.6666 9.72874 3
 -10 -3 2 16.4426 12.5482 3
 -10 -3 2 -2.9506 5.91088 1
 10 -3 -2 9.29246 8.47838 3
 10 -3 -2 14.353 7.6134 3
 10 3 -2 3.06495 7.21426 3
 10 3 -2 3.46262 9.38361 3
 -10 3 2 11.2974 9.25266 3
 -10 3 2 13.0106 13.7736 1
 -10 3 2 5.12081 7.09768 3
 -9 -3 2 166.773 12.872 3
 9 -3 -2 184.915 14.3414 3
 -9 -3 2 167.594 16.2699 3
 9 -3 -2 149.844 12.6621 3
 -9 3 2 161.24 14.6661 3
 9 3 -2 158.709 16.0761 3
 9 3 -2 168.66 12.7929 3
 -9 3 2 176.543 12.2903 3
 -9 3 2 168.639 14.1092 1
 8 -3 -2 19.2207 6.30106 3
 -8 -3 2 14.7833 6.1581 3
 8 -3 -2 18.4774 7.07697 3
 -8 -3 2 1.72515 7.76183 3
 8 3 -2 10.2079 6.34135 3
 8 3 -2 7.67572 8.57657 3
 -8 3 2 10.8764 5.87617 3
 -8 3 2 12.0965 6.80762 1
 -8 3 2 10.6424 7.42171 3
 7 -3 -2 602.685 19.9128 3
 7 -3 -2 643.046 21.2906 3
 -7 -3 2 637.601 22.7458 3
 -7 -3 2 644.872 20.7252 3
 7 3 -2 630.948 22.6557 3
 -7 3 2 600.693 21.0605 3
 -7 3 2 623.406 21.0559 1
 -7 3 2 612.586 19.7007 3
 7 3 -2 603.247 20.455 3
 -6 -3 2 171.259 13.3115 3
 -6 -3 2 172.103 11.1176 3
 6 -3 -2 180.212 11.6972 3
 6 -3 -2 159.744 11.1161 1
 6 -3 -2 148.509 10.2608 3
 6 3 -2 159.48 13.0266 3
 6 3 -2 163.82 10.9037 3
 -6 3 2 146.638 11.2632 1
 -6 3 2 163.051 11.7716 3
 -6 3 2 169.472 10.1949 3
 5 -3 -2 2594.76 64.2456 3
 -5 -3 2 2608.38 65.6507 3
 5 -3 -2 2603.82 63.7004 3
 5 -3 -2 2578.76 64.1765 1
 -5 -3 2 2666.89 64.1307 3
 -5 3 2 2628.89 64.5168 3
 5 3 -2 2613.52 65.4556 3
 5 3 -2 2606.48 64.1406 3
 -5 3 2 2662.91 64.2431 1
 -5 3 2 2643 63.5657 3
 4 -3 -2 80.3928 9.44256 3
 -4 -3 2 76.6521 8.79574 3
 4 -3 -2 64.748 8.59049 1
 -4 -3 2 66.1643 8.20821 3
 4 -3 -2 67.2536 8.01135 3
 -4 3 2 68.4218 8.1717 3
 4 3 -2 69.1846 8.34749 3
 4 3 -2 71.7896 9.36102 3
 -4 3 2 57.2852 8.50779 1
 -4 3 2 82.4445 9.3247 3
 -3 -3 2 1212.65 31.3579 3
 3 -3 -2 1163.28 31.3584 3
 3 -3 -2 1160.91 30.6688 3
 -3 -3 2 1203.3 33.1432 3
 3 -3 -2 1200.06 30.8871 1
 -3 3 2 1161.01 31.5111 3
 3 3 -2 1183.63 31.4507 3
 -3 3 2 1196.55 30.816 1
 -3 3 2 1198.57 30.6652 3
 3 3 -2 1166.48 32.6385 3
 2 -3 -2 186.398 9.44851 3
 -2 -3 2 193.482 5.82499 1
 2 -3 -2 184.341 9.36728 1
 -2 -3 2 190.145 10.4336 3
 2 -3 -2 185.142 10.2971 3
 2 3 -2 182.805 10.7116 3
 -2 3 2 188.327 10.6968 3
 -2 3 2 195.053 9.25152 3
 2 3 -2 187.584 12.3735 3
 -2 3 2 193.21 8.96825 1
 2 3 -2 186.988 8.44248 2
 -1 -3 2 103.936 8.18725 3
 1 -3 -2 90.0025 8.85514 3
 -1 -3 2 97.4785 8.96936 3
 -1 -3 2 108.918 4.68314 1
 1 -3 -2 102.935 7.96012 3
 1 -3 -2 92.6772 7.29576 1
 1 3 -2 99.442 11.0231 3
 -1 3 2 90.789 8.95636 3
 -1 3 2 116.32 10.9265 3
 1 3 -2 110.583 6.71266 2
 1 3 -2 95.2787 9.13692 3
 0 -3 2 91.5332 9.20156 3
 0 -3 -2 87.7333 7.90698 3
 0 -3 -2 102.351 6.72879 1
 0 -3 -2 86.5206 8.82405 3
 0 -3 2 123.143 5.63075 1
 0 -3 2 112.14 8.50672 3
 0 -3 2 112.53 6.4654 2
 0 3 2 103.22 10.8157 3
 0 3 -2 108.383 5.37573 1
 0 3 2 104.818 8.92384 3
 0 3 -2 94.3428 9.10981 3
 0 3 -2 107.016 6.49605 2
 -1 -3 -2 370.72 15.7293 3
 1 -3 2 360.812 13.1462 3
 1 -3 2 378.474 11.3069 2
 1 -3 2 365.662 13.9461 3
 -1 -3 -2 377.588 13.7779 3
 1 3 2 389.451 15.6477 3
 -1 3 -2 367.843 11.2803 1
 1 3 2 354.026 13.8365 3
 -1 3 -2 366.404 14.4272 3
 -1 3 -2 373.395 13.0823 3
 2 -3 2 344.371 13.8919 3
 -2 -3 -2 338.325 15.669 3
 2 -3 2 341.183 12.9331 3
 2 -3 2 336.591 10.8903 2
 -2 -3 -2 334.052 13.3134 3
 -2 3 -2 347.225 12.9186 3
 2 3 2 344.091 15.2876 3
 -2 3 -2 324.788 13.9535 3
 2 3 2 329.299 13.6404 3
 -2 3 -2 332.092 11.5244 1
 3 -3 2 -1.444 4.00566 2
 -3 -3 -2 4.71782 6.24278 3
 3 -3 2 3.69387 5.63136 3
 3 -3 2 6.95964 5.12083 3
 -3 -3 -2 -0.1999 4.92334 3
 -3 3 -2 2.08157 5.46765 3
 -3 3 -2 -3.8697 4.06452 1
 3 3 2 5.52141 6.45229 3
 3 3 2 13.3535 5.37347 3
 -3 3 -2 -0.9589 4.84114 3
 4 -3 2 185.724 11.9434 3
 -4 -3 -2 162.479 10.993 3
 4 -3 2 177.592 10.7808 3
 -4 -3 -2 170.892 13.4858 3
 -4 3 -2 177.328 10.2161 1
 4 3 2 175.226 13.4338 3
 -4 3 -2 176.462 12.0512 3
 -4 3 -2 176.427 10.5284 3
 4 3 2 172.349 11.21 3
 -5 -3 -2 864.96 27.6792 3
 5 -3 2 891.893 26.6176 3
 5 -3 2 873.692 25.6578 3
 -5 -3 -2 907.535 25.9635 3
 5 3 2 876.193 26.0405 3
 -5 3 -2 928.799 25.7253 1
 5 3 2 885.904 27.8109 3
 -5 3 -2 895.722 26.7074 3
 -5 3 -2 898.775 25.5176 3
 -6 -3 -2 276.534 15.9283 3
 -6 -3 -2 285.77 13.7637 3
 6 -3 2 263.739 14.4823 3
 6 -3 2 248.965 13.0151 3
 6 3 2 265.332 15.846 3
 6 3 2 271.91 13.7327 3
 -6 3 -2 267.377 13.0197 3
 -6 3 -2 277.924 13.4784 1
 -6 3 -2 251.036 14.2533 3
 7 -3 2 430.995 17.2991 3
 7 -3 2 473.165 19.0878 3
 -7 -3 -2 458.882 20.4983 3
 -7 -3 -2 460.606 17.7474 3
 -7 3 -2 455.864 17.2846 3
 7 3 2 480.05 20.8981 3
 -7 3 -2 434.214 17.5569 1
 7 3 2 441.724 17.8637 3
 -7 3 -2 436.982 19.2125 3
 8 -3 2 885.408 27.9696 3
 -8 -3 -2 897.963 27.9103 3
 -8 -3 -2 847.189 30.5584 3
 8 -3 2 910.996 29.2751 3
 -8 3 -2 929.15 28.5418 1
 -8 3 -2 900.297 29.6016 3
 8 3 2 944.946 31.0082 3
 -8 3 -2 923.385 27.9643 3
 8 3 2 931.663 28.5174 3
 9 -3 2 369.408 19.5547 3
 9 -3 2 375.916 18.0056 3
 -9 -3 -2 356.638 17.666 3
 -9 -3 -2 342.69 20.9088 3
 -9 3 -2 332.833 19.4835 3
 9 3 2 362.364 20.7184 3
 -9 3 -2 366.171 18.146 1
 9 3 2 360.017 17.8712 3
 -9 3 -2 354.427 17.5773 3
 10 -3 2 68.0859 11.6114 3
 -10 -3 -2 48.3919 11.6729 3
 10 -3 2 62.3598 9.78324 3
 -10 -3 -2 55.4732 11.5936 3
 10 3 2 55.9622 11.2337 3
 -10 3 -2 43.9292 10.0514 1
 10 3 2 48.6518 9.79401 3
 -10 3 -2 46.7551 11.4224 3
 -10 3 -2 58.6759 12.1627 3
 -11 -3 -2 91.5846 14.0653 3
 -11 -3 -2 110.967 12.4568 3
 11 -3 2 130.616 16.4357 3
 11 -3 2 164.596 18.2143 3
 11 3 2 124.604 15.2822 3
 -11 3 -2 111.929 13.7876 3
 11 3 2 72.0032 11.4243 3
 -11 3 -2 98.5533 11.618 3
 -11 3 -2 109.848 15.7174 1
 12 -3 2 16.8158 11.3674 3
 12 -3 2 -0.2247 9.86317 3
 -12 -3 -2 3.96573 12.4304 3
 -12 -3 -2 9.76325 9.80859 3
 12 3 2 -10.629 9.39487 3
 -12 3 -2 1.49508 12.2765 3
 12 3 2 -13.878 11.6309 3
 -12 3 -2 11.4893 9.25469 3
 -12 3 -2 10.7086 9.77064 1
 13 -3 2 33.5616 12.9568 3
 13 -3 2 17.9788 11.5682 3
 -13 -3 -2 25.8198 12.1946 3
 -13 -3 -2 41.7605 14.5558 3
 -13 3 -2 31.2169 11.1794 1
 -13 3 -2 21.307 10.9959 3
 13 3 2 15.0832 11.1904 3
 -13 3 -2 27.6955 14.1544 3
 13 3 2 21.1845 13.8327 3
 -14 -3 -2 20.2434 15.5515 3
 14 -3 2 29.0708 14.5466 3
 -14 -3 -2 19.8759 12.8614 3
 14 -3 2 10.4332 11.8944 3
 -14 3 -2 39.8555 11.9428 1
 -14 3 -2 13.7711 14.377 3
 14 3 2 12.2136 15.6412 3
 -14 3 -2 -3.3425 11.9704 3
 14 3 2 8.21395 11.7054 3
 15 -3 2 -1.7705 12.5227 3
 -15 -3 -2 4.01131 11.0921 1
 15 -3 2 5.45036 15.1631 3
 -15 -3 -2 1.70076 16.1138 3
 -15 -3 -2 0.70857 13.7503 3
 -15 3 -2 -11.891 12.3449 3
 -15 3 -2 7.50137 16.5892 3
 15 3 2 16.0263 16.8757 3
 -15 3 -2 10.3214 11.8869 1
 15 3 2 32.7864 13.8958 3
 -15 -4 2 12.4245 10.6919 1
 15 -4 -2 -13.334 15.1369 3
 -15 -4 2 16.133 18.1784 3
 15 -4 -2 0.73874 14.276 3
 -15 -4 2 9.17777 14.5471 3
 15 4 -2 -23.169 12.7425 3
 -15 4 2 6.19034 14.4941 1
 -15 4 2 11.4194 17.0294 3
 15 4 -2 -25.603 16.3265 3
 -15 4 2 6.95796 12.9679 3
 14 -4 -2 -6.6707 13.8962 3
 -14 -4 2 17.442 8.8309 1
 -14 -4 2 22.9413 12.0598 3
 14 -4 -2 -4.2114 11.3907 3
 -14 -4 2 -11.979 15.3097 3
 14 4 -2 -27.097 11.2631 3
 -14 4 2 -6.2848 11.7607 1
 14 4 -2 51.6238 16.286 3
 -14 4 2 6.51898 14.3106 3
 -14 4 2 8.01909 11.1747 3
 13 -4 -2 38.7608 13.3884 3
 -13 -4 2 34.1325 14.6644 3
 -13 -4 2 20.4323 8.37196 1
 -13 -4 2 45.4106 11.76 3
 13 -4 -2 53.6084 12.0156 3
 13 4 -2 21.2798 11.2643 3
 -13 4 2 29.6939 12.5892 1
 -13 4 2 43.8227 11.0137 3
 13 4 -2 43.1004 14.8901 3
 -13 4 2 54.8558 13.2464 3
 12 -4 -2 27.6158 9.93787 3
 12 -4 -2 28.8413 11.1253 3
 -12 -4 2 16.3141 7.91084 1
 -12 -4 2 16.3781 12.4694 3
 -12 -4 2 0.358 9.2151 3
 -12 4 2 18.1486 9.69848 3
 -12 4 2 21.2127 12.1051 3
 -12 4 2 13.5779 11.0026 1
 12 4 -2 31.6057 12.5344 3
 12 4 -2 7.04815 9.81156 3
 -11 -4 2 7.40406 8.77021 3
 -11 -4 2 5.36561 6.99139 1
 -11 -4 2 18.5643 11.9135 3
 11 -4 -2 -0.204 9.53751 3
 11 -4 -2 1.99569 8.84666 3
 -11 4 2 12.3486 11.0328 3
 -11 4 2 2.89704 8.49431 3
 11 4 -2 20.0186 9.3719 3
 11 4 -2 28.0358 12.0488 3
 -11 4 2 9.95328 9.9418 1
 -10 -4 2 17.3862 8.26285 3
 10 -4 -2 14.1941 8.74395 3
 -10 -4 2 24.9121 11.6413 3
 10 -4 -2 15.5915 8.3206 3
 -10 4 2 21.0834 10.465 3
 10 4 -2 24.6896 8.89204 3
 -10 4 2 11.3482 8.55597 3
 -10 4 2 18.2535 9.33103 1
 10 4 -2 25.928 11.1713 3
 -9 -4 2 8.25265 8.961 3
 9 -4 -2 -0.5702 8.30919 3
 -9 -4 2 6.55703 10.2356 3
 9 -4 -2 9.97372 8.11187 3
 -9 4 2 11.2274 9.15736 3
 -9 4 2 -2.3965 8.64992 1
 9 4 -2 9.44045 7.95802 3
 -9 4 2 4.53711 7.38501 3
 9 4 -2 16.5827 10.8146 3
 -8 -4 2 51.2818 8.09573 3
 8 -4 -2 49.0026 8.26698 3
 8 -4 -2 56.8337 9.23566 3
 -8 -4 2 45.7947 10.7981 3
 -8 4 2 65.3262 9.60004 3
 8 4 -2 63.203 8.73689 3
 -8 4 2 47.3154 8.04738 3
 8 4 -2 57.6154 11.0847 3
 -8 4 2 54.804 8.9069 1
 7 -4 -2 27.2118 7.76217 3
 7 -4 -2 11.7621 6.50274 3
 -7 -4 2 15.2898 9.276 3
 -7 -4 2 16.8942 6.95584 3
 7 4 -2 24.8927 9.09634 3
 -7 4 2 9.00409 6.29371 3
 7 4 -2 9.03816 7.10489 3
 -7 4 2 23.6728 7.46316 3
 -7 4 2 23.9599 7.5503 1
 6 -4 -2 126.403 11.2468 3
 -6 -4 2 131.955 14.7964 3
 6 -4 -2 156.438 12.6937 3
 6 -4 -2 140.012 11.9049 1
 -6 -4 2 146.65 11.8775 3
 -6 4 2 146.452 11.139 3
 -6 4 2 131.604 11.5997 1
 -6 4 2 133.297 12.2169 3
 6 4 -2 151.39 12.5605 3
 6 4 -2 142.96 14.7791 3
 -5 -4 2 3.91312 5.71556 3
 5 -4 -2 5.01566 5.95798 1
 -5 -4 2 -8.0602 7.64867 3
 5 -4 -2 7.30265 6.31463 3
 5 -4 -2 -0.1674 5.65568 3
 5 4 -2 2.46332 6.14537 3
 5 4 -2 2.65469 7.72074 3
 -5 4 2 -0.5829 5.34477 3
 -5 4 2 13.5255 6.57911 3
 -5 4 2 5.70337 5.70605 1
 -4 -4 2 51.9408 9.20805 3
 4 -4 -2 41.3502 7.26387 3
 -4 -4 2 53.9353 6.93979 3
 4 -4 -2 39.7788 6.59561 3
 4 -4 -2 46.7357 6.6778 1
 -4 4 2 40.7774 7.17608 3
 -4 4 2 48.8437 6.6028 1
 4 4 -2 50.3631 7.6153 3
 -4 4 2 40.5684 6.2614 3
 4 4 -2 49.0582 8.71606 3
 3 -4 -2 814.727 23.3162 1
 -3 -4 2 845.515 24.7182 3
 3 -4 -2 792.323 23.7322 3
 3 -4 -2 794.281 24.522 3
 -3 -4 2 794.28 19.788 1
 3 4 -2 840.873 24.9594 3
 -3 4 2 812.647 23.514 3
 3 4 -2 771.799 22.1982 2
 3 4 -2 869.317 26.6501 3
 -3 4 2 786.723 22.9513 1
 -3 4 2 795.145 24.7614 3
 2 -4 -2 7.65682 5.91551 3
 -2 -4 2 2.62696 5.25714 3
 2 -4 -2 0.05236 4.58159 1
 -2 -4 2 -2.4627 5.23504 3
 2 -4 -2 5.68788 5.24843 3
 -2 -4 2 1.69857 2.58675 1
 -2 4 2 5.59121 5.72978 3
 2 4 -2 9.38742 5.76347 3
 2 4 -2 6.44078 7.43532 3
 -2 4 2 6.08868 7.11658 3
 2 4 -2 2.36107 4.09334 2
 -1 -4 2 159.178 11.2804 3
 1 -4 -2 154.525 11.3522 3
 1 -4 -2 147.005 8.85395 1
 1 -4 -2 148.924 10.2761 3
 -1 -4 2 137.931 10.2558 3
 -1 -4 2 153.67 6.70355 1
 -1 4 2 174.113 13.3815 3
 1 4 -2 173.505 13.6535 3
 1 4 -2 152.687 8.08048 2
 -1 4 2 167.371 11.5172 3
 1 4 -2 142.187 11.53 3
 0 -4 2 15.9536 3.64972 1
 0 -4 2 14.2202 5.42347 3
 0 -4 -2 9.46131 5.0812 3
 0 -4 -2 14.5267 5.74801 3
 0 -4 2 14.4574 6.10817 3
 0 -4 -2 16.0815 4.52233 1
 0 4 2 22.7508 7.66721 3
 0 4 -2 29.9053 8.10505 3
 0 4 -2 10.1003 4.27144 2
 0 4 -2 22.004 6.47674 3
 0 4 2 13.6137 5.90289 3
 1 -4 2 5.62929 6.15847 3
 -1 -4 -2 8.00842 6.02769 3
 1 -4 2 -2.4678 5.46599 3
 1 -4 2 3.82421 3.79724 2
 -1 -4 -2 1.42741 4.04546 1
 1 4 2 -1.0166 3.19001 2
 -1 4 -2 5.97948 3.86758 1
 1 4 2 15.7677 6.15779 3
 -1 4 -2 16.4895 5.61325 3
 -1 4 -2 7.29431 6.16001 3
 1 4 2 9.30981 7.63483 3
 2 -4 2 762.369 23.6547 3
 -2 -4 -2 785.246 23.3092 3
 -2 -4 -2 741.559 25.2879 3
 2 -4 2 736.685 22.5904 3
 2 -4 2 764.628 20.0484 2
 -2 4 -2 737.971 20.6396 1
 -2 4 -2 740.76 22.5483 3
 2 4 2 745.08 25.0591 3
 -2 4 -2 730.367 23.7021 3
 2 4 2 750.203 23.4369 3
 3 -4 2 3.38181 4.04348 2
 3 -4 2 2.06329 5.53377 3
 -3 -4 -2 4.18196 5.65656 3
 3 -4 2 8.48002 6.59126 3
 -3 -4 -2 12.755 7.64317 3
 -3 4 -2 15.2285 6.71402 3
 3 4 2 18.3936 8.15948 3
 3 4 2 16.9261 6.25268 3
 -3 4 -2 -0.6056 4.70695 1
 -3 4 -2 -9.5135 5.32473 3
 -4 -4 -2 10.4777 7.973 3
 -4 -4 -2 -1.9613 5.53189 3
 4 -4 2 2.59983 6.20013 3
 4 -4 2 0.77221 5.48052 3
 4 -4 2 6.14185 4.52913 2
 -4 4 -2 6.51197 6.58737 3
 4 4 2 -2.2028 7.60106 3
 -4 4 -2 6.20026 5.99399 3
 4 4 2 13.2267 6.40434 3
 -4 4 -2 5.83302 5.25307 1
 5 -4 2 10.4448 7.05573 3
 5 -4 2 9.66235 6.33189 3
 -5 -4 -2 3.05699 7.71289 3
 -5 -4 -2 10.2481 6.3914 3
 5 4 2 12.9176 6.85709 3
 -5 4 -2 15.8498 6.11789 3
 5 4 2 18.2667 8.56979 3
 -5 4 -2 12.3282 6.06724 1
 -5 4 -2 8.44148 7.0524 3
 6 -4 2 45.8911 7.79621 3
 -6 -4 -2 42.1823 9.95992 3
 6 -4 2 40.6873 8.19061 3
 -6 -4 -2 47.406 7.57917 3
 6 4 2 29.0116 9.38917 3
 -6 4 -2 41.0295 7.46396 3
 -6 4 -2 50.6958 8.91582 3
 6 4 2 34.7912 7.57193 3
 -6 4 -2 34.7605 6.88845 1
 -7 -4 -2 18.6921 7.34985 3
 7 -4 2 18.977 8.10938 3
 -7 -4 -2 23.9346 9.6333 3
 7 -4 2 12.0374 7.33451 3
 -7 4 -2 19.552 8.37909 3
 -7 4 -2 19.7064 7.07479 3
 -7 4 -2 14.171 6.687 1
 7 4 2 16.7628 7.74368 3
 7 4 2 12.6961 9.10745 3
 -8 -4 -2 -3.1065 9.20251 3
 8 -4 2 4.37469 7.52526 3
 -8 -4 -2 -4.1231 7.01544 3
 8 -4 2 3.15736 8.57139 3
 8 4 2 5.25445 9.92695 3
 8 4 2 -8.4043 7.50895 3
 -8 4 -2 5.01284 8.50374 3
 -8 4 -2 3.51227 7.01401 1
 -8 4 -2 7.14621 7.45481 3
 -9 -4 -2 8.80584 8.80311 3
 9 -4 2 16.789 8.61423 3
 -9 -4 -2 2.40171 10.9342 3
 9 -4 2 18.2314 9.87917 3
 -9 4 -2 20.6672 14.4069 1
 -9 4 -2 20.2565 10.1315 3
 9 4 2 20.3516 11.8184 3
 9 4 2 8.69464 8.54733 3
 -9 4 -2 18.8485 9.95251 3
 -10 -4 -2 40.8175 10.0553 3
 10 -4 2 26.6517 9.45768 3
 -10 -4 -2 10.8257 11.823 3
 10 -4 2 27.9711 10.9867 3
 10 4 2 38.6063 11.9839 3
 10 4 2 16.7999 9.63823 3
 -10 4 -2 18.2914 11.3581 3
 -10 4 -2 25.5888 9.86637 1
 -10 4 -2 26.8015 9.38678 3
 -11 -4 -2 65.9092 14.6388 3
 -11 -4 -2 81.3231 11.7711 3
 11 -4 2 68.1672 13.0383 3
 11 -4 2 78.0504 12.4203 3
 11 4 2 63.289 11.7492 3
 -11 4 -2 79.6315 14.5784 3
 -11 4 -2 82.8086 11.6376 1
 11 4 2 99.2297 15.0338 3
 -11 4 -2 93.5553 12.0843 3
 12 -4 2 35.5661 12.3156 3
 12 -4 2 11.9101 10.6315 3
 -12 -4 -2 33.8518 14.958 3
 -12 -4 -2 23.3983 10.9206 3
 12 4 2 18.8938 13.6174 3
 12 4 2 17.7547 10.9621 3
 -12 4 -2 19.5876 10.4136 3
 -12 4 -2 0.98435 9.56339 1
 -12 4 -2 20.1052 13.3829 3
 -13 -4 -2 70.923 17.6588 3
 13 -4 2 84.6314 15.2954 3
 13 -4 2 65.6269 14.1525 3
 -13 -4 -2 50.4635 12.7515 3
 -13 4 -2 73.2442 13.4467 3
 -13 4 -2 84.8787 16.3419 3
 13 4 2 53.5483 13.3034 3
 -13 4 -2 60.1641 13.3095 1
 13 4 2 57.2614 15.6777 3
 -14 -4 -2 28.8323 17.6474 3
 -14 -4 -2 -12.042 12.9901 3
 14 -4 2 50.6282 16.5807 3
 14 -4 2 -19.728 13.1285 3
 -14 4 -2 20.5668 12.2637 3
 -14 4 -2 2.76606 16.3022 3
 14 4 2 -27.985 15.7387 3
 14 4 2 27.7504 13.3216 3
 -14 4 -2 -3.0649 12.0404 1
 -15 -4 -2 61.0694 21.5295 3
 15 -4 2 26.8106 17.3117 3
 15 -4 2 -28.072 14.5821 3
 -15 -4 -2 11.7039 15.7166 3
 -15 -4 -2 -5.3016 10.9163 1
 -15 4 -2 17.2766 14.808 3
 15 4 2 26.5863 14.6956 3
 -15 4 -2 -25.46 13.896 1
 14 -5 -2 16.4305 15.0339 3
 -14 -5 2 -3.6973 19.2914 3
 -14 -5 2 12.8525 13.8871 3
 -14 -5 2 18.4775 16.4569 1
 14 -5 -2 6.96312 14.071 3
 -14 5 2 -8.1598 13.1234 3
 -14 5 2 -10.06 13.7389 1
 -14 5 2 -12.335 16.8116 3
 14 5 -2 6.41334 13.3266 3
 14 5 -2 6.0693 16.7848 3
 -13 -5 2 138.159 13.4094 1
 13 -5 -2 127.729 15.7224 3
 13 -5 -2 119.591 17.0732 3
 -13 -5 2 106.279 20.3204 3
 -13 -5 2 124.941 14.924 3
 -13 5 2 106.584 14.2974 3
 -13 5 2 111.495 15.4486 1
 13 5 -2 115.769 15.2624 3
 -13 5 2 118.38 17.4928 3
 13 5 -2 98.7985 17.9594 3
 -12 -5 2 49.7641 12.1401 3
 -12 -5 2 45.2022 8.42944 1
 -12 -5 2 59.976 16.2522 3
 12 -5 -2 27.334 11.4251 3
 12 -5 -2 37.8189 13.7467 3
 12 5 -2 53.6525 12.8789 3
 -12 5 2 42.8451 13.9772 3
 12 5 -2 65.264 15.2134 3
 -12 5 2 47.4881 11.2603 3
 -12 5 2 43.7281 13.0525 1
 11 -5 -2 216.536 20.7319 3
 -11 -5 2 266.605 25.7084 3
 -11 -5 2 193.621 13.0367 1
 -11 -5 2 182.116 18.7071 3
 11 -5 -2 211.024 18.8485 3
 -11 5 2 209.931 17.3426 3
 -11 5 2 219.463 21.6196 3
 11 5 -2 191.977 19.903 3
 11 5 -2 246.143 24.3812 3
 -11 5 2 213.992 20.0072 1
 10 -5 -2 143.782 17.9776 3
 10 -5 -2 109.648 12.2232 3
 -10 -5 2 101.868 10.7398 1
 -10 -5 2 130.365 16.2834 3
 -10 -5 2 95.7571 16.0628 3
 10 5 -2 118.645 15.8256 3
 -10 5 2 110.78 13.9318 3
 -10 5 2 123.089 17.0055 1
 -10 5 2 115.682 15.664 3
 10 5 -2 118.377 13.1039 3
 9 -5 -2 78.135 10.7838 3
 9 -5 -2 103.204 12.4564 3
 -9 -5 2 121.475 15.6239 3
 -9 -5 2 93.8323 11.2412 3
 -9 5 2 87.6317 12.3649 3
 -9 5 2 91.4884 11.8497 1
 -9 5 2 93.8294 10.72 3
 9 5 -2 85.9514 11.4349 3
 9 5 -2 99.3736 13.8372 3
 8 -5 -2 89.6322 11.4391 3
 -8 -5 2 138.935 15.8144 3
 -8 -5 2 110.062 14.682 3
 8 -5 -2 89.7996 10.6688 3
 -8 5 2 112.332 13.4982 3
 -8 5 2 103.6 13.4419 1
 8 5 -2 95.7274 14.247 3
 -8 5 2 97.6677 12.0399 3
 8 5 -2 101.3 18.1376 3
 -7 -5 2 79.6947 9.92875 3
 7 -5 -2 79.0208 10.6335 3
 -7 -5 2 85.7498 13.8144 3
 7 -5 -2 90.4064 10.164 3
 7 5 -2 83.4462 10.9092 3
 7 5 -2 81.5807 12.374 3
 -7 5 2 64.3413 10.123 3
 -7 5 2 79.3641 9.87273 1
 -7 5 2 82.6892 13.7234 3
 6 -5 -2 14.0292 5.17967 2
 -6 -5 2 13.3235 7.49019 3
 -6 -5 2 11.1583 9.92167 3
 6 -5 -2 26.0368 8.44069 3
 6 -5 -2 20.0542 7.90543 3
 -6 5 2 26.2996 7.58901 1
 6 5 -2 29.8912 8.61709 3
 -6 5 2 17.1282 7.1814 3
 -6 5 2 10.203 8.45289 3
 6 5 -2 11.8701 10.6084 3
 5 -5 -2 163.29 14.3028 3
 -5 -5 2 173.882 13.6482 3
 -5 -5 2 189.275 17.6494 3
 5 -5 -2 201.947 13.4413 1
 5 -5 -2 175.308 13.1058 3
 -5 5 2 205.921 13.155 3
 -5 5 2 158.582 14.3409 3
 -5 5 2 187.563 12.6145 1
 5 5 -2 170.909 14.6799 3
 5 5 -2 169.986 18.0121 3
 -4 -5 2 -2.8301 2.7837 1
 -4 -5 2 -0.3848 6.9676 3
 4 -5 -2 3.03925 6.86672 3
 -4 -5 2 3.61677 6.30727 3
 4 -5 -2 2.50338 6.08581 1
 4 -5 -2 0.9898 6.67221 3
 4 5 -2 -3.3901 5.19736 2
 -4 5 2 3.70346 6.09991 3
 4 5 -2 6.14232 9.17387 3
 -4 5 2 -1.0035 5.80859 1
 -4 5 2 4.72189 7.3981 3
 4 5 -2 -2.4152 6.8923 3
 -3 -5 2 331.809 15.8438 3
 3 -5 -2 348.599 15.7883 3
 3 -5 -2 351.988 14.7791 1
 -3 -5 2 351.745 10.1534 1
 -3 -5 2 349.028 16.7222 3
 3 -5 -2 352.145 16.8071 3
 -3 5 2 355.633 19.5596 3
 3 5 -2 332.908 18.9851 3
 -3 5 2 344.273 17.0082 3
 3 5 -2 359.978 16.7579 3
 -3 5 2 358.59 14.1254 1
 3 5 -2 355.214 13.2464 2
 2 -5 -2 51.6629 8.187 3
 -2 -5 2 58.2127 8.04381 3
 -2 -5 2 37.312 5.2015 1
 -2 -5 2 50.0969 7.89395 3
 2 -5 -2 58.5323 7.62253 3
 2 -5 -2 63.9867 6.95683 1
 -2 5 2 60.58 9.71428 3
 2 5 -2 51.7486 5.78688 2
 2 5 -2 43.9538 9.38967 3
 -2 5 2 53.6651 8.29543 3
 2 5 -2 53.3513 8.41743 3
 -1 -5 2 711.6 22.8545 3
 -1 -5 2 700.562 18.5077 1
 -1 -5 2 707.421 23.3705 3
 1 -5 -2 680.968 23.1947 3
 1 -5 -2 697.171 22.4694 3
 1 -5 -2 696.662 20.6317 1
 1 5 -2 661.063 19.5055 2
 -1 5 2 704.566 25.655 3
 1 5 -2 689.941 23.7187 3
 1 5 -2 730.672 25.9148 3
 -1 5 2 685.759 23.5238 3
 0 -5 -2 211.832 12.5222 3
 0 -5 2 189.746 12.7687 3
 0 -5 2 201.269 8.9787 1
 0 -5 -2 189.887 10.2528 1
 0 -5 -2 209.616 13.7534 3
 0 -5 2 205.629 13.7816 3
 0 5 -2 219.996 16.5593 3
 0 5 2 211.132 13.8717 3
 0 5 -2 190.782 9.67733 2
 0 5 2 218.069 16.6031 3
 0 5 -2 196.178 13.9909 3
 -1 -5 -2 1072.44 29.0339 1
 1 -5 2 1151.53 32.9697 3
 -1 -5 -2 1111.15 31.6837 3
 1 -5 2 1086.31 31.6874 3
 -1 -5 -2 1174.04 32.694 3
 1 5 2 1053.6 27.4913 2
 -1 5 -2 1113.89 32.9281 3
 1 5 2 1126.06 32.6517 3
 1 5 2 1147.84 34.8938 3
 -1 5 -2 1127.46 34.8604 3
 -2 -5 -2 4.29196 4.71498 1
 2 -5 2 6.8408 4.27381 2
 2 -5 2 8.6347 6.88532 3
 2 -5 2 12.6193 6.73542 3
 -2 -5 -2 4.17339 6.34628 3
 -2 -5 -2 -5.9928 5.94227 3
 -2 5 -2 15.9663 6.39184 3
 2 5 2 7.5462 4.03889 2
 -2 5 -2 13.0255 7.65872 3
 2 5 2 10.6677 7.42177 3
 -2 5 -2 3.2603 4.85821 1
 2 5 2 14.7684 8.41091 3
 3 -5 2 212.662 13.9 3
 3 -5 2 236.573 15.012 3
 3 -5 2 241.984 10.251 2
 -3 -5 -2 242.738 17.8335 3
 -3 -5 -2 242.965 14.4246 3
 -3 5 -2 229.651 15.4961 3
 -3 5 -2 257.645 14.0412 3
 3 5 2 228.292 15.2445 3
 -3 5 -2 234.146 11.4377 1
 3 5 2 246.614 17.3542 3
 -4 -5 -2 63.4155 11.7533 3
 4 -5 2 47.9544 8.0804 3
 4 -5 2 58.6982 6.25185 2
 -4 -5 -2 56.3289 8.7435 3
 4 -5 2 63.2138 9.16538 3
 4 5 2 70.5585 9.12147 3
 -4 5 -2 58.1156 9.57183 3
 -4 5 -2 52.669 7.34206 1
 4 5 2 61.8637 10.9516 3
 -4 5 -2 56.5238 8.28781 3
 -5 -5 -2 62.9297 11.8317 3
 5 -5 2 53.0247 9.6747 3
 -5 -5 -2 65.3437 9.27237 3
 5 -5 2 71.6594 9.27559 2
 5 -5 2 59.2947 8.92972 3
 -5 5 -2 69.2305 8.17631 1
 -5 5 -2 54.8621 10.0855 3
 5 5 2 68.473 9.75411 3
 -5 5 -2 54.6855 8.71018 3
 5 5 2 68.0037 11.8697 3
 -6 -5 -2 34.0155 8.40376 3
 6 -5 2 30.2757 9.22019 3
 6 -5 2 26.3169 8.47182 3
 6 -5 2 28.4087 6.45172 2
 -6 -5 -2 32.44 11.0733 3
 6 5 2 24.0906 8.69499 3
 -6 5 -2 24.1672 7.71412 1
 6 5 2 40.9937 11.5428 3
 -6 5 -2 28.8228 9.1993 3
 -6 5 -2 31.4607 7.94269 3
 7 -5 2 6.27987 8.72314 3
 -7 -5 -2 -2.5939 10.2274 3
 7 -5 2 1.98952 8.11841 3
 -7 -5 -2 8.0158 7.83187 3
 7 5 2 2.75904 8.61086 3
 -7 5 -2 -1.4644 7.38824 3
 7 5 2 -5.4136 10.2994 3
 -7 5 -2 4.05252 8.8103 3
 -7 5 -2 -1.8501 7.24304 1
 8 -5 2 30.5919 13.1398 3
 8 -5 2 11.5528 10.0389 3
 -8 -5 -2 18.2154 11.6519 3
 8 5 2 18.7237 12.1214 3
 -8 5 -2 51.5069 11.1253 3
 -8 5 -2 31.751 9.4938 1
 -8 5 -2 36.9356 9.2416 3
 8 5 2 39.3033 10.3959 3
 -9 -5 -2 36.0652 12.9384 3
 -9 -5 -2 11.3865 8.99574 3
 9 -5 2 7.45185 9.12467 3
 9 -5 2 13.7684 10.1302 3
 9 5 2 27.1381 12.7409 3
 9 5 2 21.5607 9.8798 3
 -9 5 -2 11.0193 9.0517 1
 -9 5 -2 8.29632 8.92841 3
 -9 5 -2 15.9686 11.0089 3
 10 -5 2 146.169 17.2631 3
 -10 -5 -2 159.49 18.268 3
 -10 -5 -2 144.789 17.959 3
 10 -5 2 133.447 14.9686 3
 -10 5 -2 142.434 17.4929 3
 10 5 2 166.434 19.3465 3
 -10 5 -2 165.876 17.939 1
 -10 5 -2 149.484 16.5061 3
 10 5 2 182.105 22.4627 3
 11 -5 2 1.38547 12.4053 3
 11 -5 2 17.5021 10.8709 3
 -11 -5 -2 12.6715 15.4456 3
 -11 -5 -2 22.7866 11.2035 3
 -11 5 -2 15.9402 10.4259 3
 11 5 2 28.2259 12.1524 3
 -11 5 -2 5.00334 13.3328 3
 11 5 2 26.7323 15.2647 3
 -11 5 -2 2.44286 10.5731 1
 -12 -5 -2 126.247 15.245 3
 12 -5 2 134.76 15.5575 3
 12 -5 2 107.951 16.8238 3
 -12 -5 -2 130.113 19.0811 3
 -12 5 -2 130.736 17.6333 3
 -12 5 -2 154.017 20.4462 1
 -12 5 -2 135.903 15.4593 3
 12 5 2 101.948 17.8149 3
 12 5 2 177.242 21.369 3
 13 -5 2 13.1963 14.9591 3
 13 -5 2 -19.725 12.7656 3
 -13 -5 -2 4.98043 17.6295 3
 -13 5 -2 13.4648 12.8616 3
 13 5 2 -5.5194 12.6738 3
 13 5 2 -14.004 16.2672 3
 -13 5 -2 21.2505 13.2154 1
 -13 5 -2 -16.664 16.0937 3
 12 -6 -2 38.1518 14.8691 3
 12 -6 -2 -5.8554 12.6302 3
 -12 -6 2 45.2689 8.01807 1
 -12 -6 2 8.69903 16.7326 3
 -12 -6 2 23.9891 12.2271 3
 -12 6 2 23.0937 11.6089 3
 12 6 -2 51.1393 19.8501 3
 -12 6 2 41.7425 14.192 1
 -12 6 2 19.2064 16.0652 3
 12 6 -2 19.7993 14.2552 3
 11 -6 -2 30.383 13.6464 3
 -11 -6 2 36.291 15.8643 3
 -11 -6 2 21.3082 6.56413 1
 -11 -6 2 35.6073 12.7613 3
 11 -6 -2 16.5193 11.7389 3
 -11 6 2 40.8589 13.3182 1
 -11 6 2 32.5648 14.5391 3
 11 6 -2 34.7 12.998 3
 11 6 -2 50.6323 18.0043 3
 -11 6 2 1.55096 10.3051 3
 -10 -6 2 73.0247 9.4896 1
 10 -6 -2 88.9627 13.2815 3
 -10 -6 2 91.6733 13.1254 3
 10 -6 -2 94.4684 14.467 3
 -10 -6 2 89.1033 18.1689 3
 -10 6 2 75.4531 14.5563 3
 -10 6 2 95.0383 14.1936 1
 -10 6 2 76.7303 12.1577 3
 10 6 -2 76.3296 14.3446 3
 10 6 -2 89.554 17.0861 3
 -9 -6 2 -4.5951 13.8975 3
 -9 -6 2 -4.4488 5.18918 1
 9 -6 -2 14.4726 9.93401 3
 -9 -6 2 4.22084 9.53877 3
 9 -6 -2 -2.3674 10.0228 3
 -9 6 2 -0.6362 10.3809 1
 -9 6 2 -8.5002 10.5839 3
 9 6 -2 17.2504 13.7262 3
 -9 6 2 13.7801 9.61868 3
 9 6 -2 -3.6263 10.2869 3
 8 -6 -2 18.9274 9.80974 3
 -8 -6 2 28.1855 13.9386 3
 -8 -6 2 36.1583 10.4267 3
 8 -6 -2 2.71659 10.0335 3
 8 -6 -2 20.8525 6.47466 2
 -8 6 2 18.7242 9.60084 1
 8 6 -2 20.8092 9.80775 3
 8 6 -2 32.5185 13.2624 3
 -8 6 2 5.76385 9.37648 3
 -8 6 2 24.5358 11.1915 3
 -7 -6 2 3.88809 9.09509 3
 7 -6 -2 23.0051 10.085 3
 7 -6 -2 19.2367 9.42274 3
 -7 -6 2 36.8567 13.0503 3
 -7 6 2 36.3599 10.9266 3
 -7 6 2 43.4954 9.83137 3
 7 6 -2 36.1677 13.5077 3
 7 6 -2 25.5599 10.7031 3
 -7 6 2 30.9854 15.4135 1
 6 -6 -2 9.25083 8.88211 3
 -6 -6 2 10.9358 8.21084 3
 6 -6 -2 20.3143 10.3314 3
 6 6 -2 10.0635 12.0875 3
 6 6 -2 27.6832 7.65881 2
 -6 6 2 31.529 8.77302 1
 6 6 -2 12.0874 11.0997 3
 -6 6 2 29.6717 8.5838 3
 -6 6 2 17.0185 10.3054 3
 5 -6 -2 2.9546 9.08392 3
 5 -6 -2 14.2185 8.70312 3
 -5 -6 2 -1.3388 8.14509 3
 -5 -6 2 29.0578 9.09976 3
 5 -6 -2 8.28822 8.3629 1
 -5 6 2 28.1675 10.2159 3
 5 6 -2 3.90245 8.87723 3
 5 6 -2 -4.5051 11.8029 3
 -5 6 2 -0.6795 7.31254 1
 5 6 -2 8.63151 6.62101 2
 -4 -6 2 -3.406 8.12372 3
 4 -6 -2 0.22713 7.76297 3
 -4 -6 2 -5.4828 7.62544 3
 4 -6 -2 -6.2993 8.4571 3
 4 -6 -2 9.44471 7.53975 1
 4 6 -2 10.6122 11.0572 3
 -4 6 2 -1.3747 10.5532 3
 4 6 -2 4.66557 5.96205 2
 4 6 -2 12.7772 8.80824 3
 -4 6 2 -3.8576 8.87274 3
 3 -6 -2 -0.1025 6.90427 1
 3 -6 -2 6.04533 7.67014 3
 -3 -6 2 0.86028 8.02392 3
 -3 -6 2 -11.622 7.63986 3
 -3 -6 2 -2.4018 3.36204 1
 3 -6 -2 0.83567 8.15749 3
 -3 6 2 2.74354 8.56992 3
 3 6 -2 23.1271 10.5987 3
 3 6 -2 4.49226 8.3592 3
 -3 6 2 8.75181 10.7249 3
 3 6 -2 2.86026 5.67565 2
 2 -6 -2 28.7628 8.4953 3
 -2 -6 2 15.473 8.40221 3
 2 -6 -2 30.7555 9.15113 3
 2 -6 -2 25.7677 7.50108 1
 -2 -6 2 31.432 4.46785 1
 -2 -6 2 31.1299 8.52035 3
 -2 6 2 26.2448 8.78307 3
 2 6 -2 33.7168 9.4439 3
 2 6 -2 18.5697 5.70282 2
 2 6 -2 28.3764 11.1073 3
 -2 6 2 29.6313 10.8694 3
 1 -6 -2 8.54671 5.84112 1
 1 -6 -2 3.21127 8.26088 3
 -1 -6 2 -10.721 7.52735 3
 -1 -6 2 9.54983 7.87477 3
 1 -6 -2 11.1992 7.86137 3
 -1 6 2 16.5134 8.72327 3
 1 6 -2 -3.4108 10.5124 3
 -1 6 2 -3.3205 9.54749 3
 1 6 -2 4.20647 8.56839 3
 1 6 -2 2.51266 5.36498 2
 0 -6 -2 186.125 14.298 3
 0 -6 -2 175.853 11.0958 1
 0 -6 -2 219.951 15.6652 3
 0 -6 2 173.514 15.2304 3
 0 -6 2 181.178 14.4527 3
 0 6 2 194.843 18.274 3
 0 6 -2 164.196 18.9013 3
 0 6 -2 204.437 10.2975 2
 0 6 2 194.622 16.2605 3
 0 6 -2 183.82 16.138 3
 1 -6 2 72.1432 9.56701 3
 1 -6 2 59.8533 9.95724 3
 -1 -6 -2 60.9595 9.64945 3
 -1 -6 -2 111.987 14.1872 3
 -1 -6 -2 61.7674 8.94812 1
 1 6 2 59.4649 12.441 3
 -1 6 -2 82.1062 12.7763 3
 -1 6 -2 63.4858 10.327 3
 1 6 2 59.3578 9.82883 3
 -2 -6 -2 374.327 18.862 3
 2 -6 2 380.801 19.578 3
 2 -6 2 378.467 18.4254 3
 -2 -6 -2 349.397 17.97 3
 -2 -6 -2 342.87 13.5536 1
 2 6 2 388.758 22.2042 3
 2 6 2 340.586 12.3879 2
 2 6 2 393.783 19.9716 3
 -2 6 -2 385.243 20.1974 3
 -2 6 -2 343.959 22.3716 3
 3 -6 2 15.8908 8.12276 3
 3 -6 2 27.879 9.44598 3
 -3 -6 -2 11.3853 5.29055 1
 3 -6 2 12.2557 5.11453 2
 -3 -6 -2 16.0541 8.15368 3
 -3 -6 -2 28.191 9.04321 3
 3 6 2 7.64461 5.10059 2
 3 6 2 26.9002 11.1005 3
 -3 6 -2 8.65073 9.01029 3
 3 6 2 5.03058 8.59514 3
 -3 6 -2 15.0706 6.30719 1
 -4 -6 -2 352.903 13.5433 1
 -4 -6 -2 379.571 19.7993 3
 4 -6 2 383.575 20.261 3
 4 -6 2 379.223 13.5615 2
 4 -6 2 385.076 19.0266 3
 4 6 2 376.03 14.5156 2
 4 6 2 386.155 24.5084 3
 -4 6 -2 371.118 20.7665 3
 -4 6 -2 374.11 16.1975 1
 -4 6 -2 388.637 18.9428 3
 4 6 2 365.218 20.5261 3
 -5 -6 -2 -9.8928 8.2145 3
 5 -6 2 -5.3798 8.30655 3
 -5 -6 -2 4.38743 10.3871 3
 5 -6 2 -7.4568 8.62309 3
 5 -6 2 1.33249 5.80129 2
 5 6 2 -3.4096 9.19532 3
 5 6 2 -6.9953 12.025 3
 -5 6 -2 -3.0317 9.57747 3
 -5 6 -2 14.9491 8.7372 3
 -5 6 -2 -0.939 7.47046 1
 6 -6 2 -4.2512 9.11364 3
 6 -6 2 4.97556 9.10763 3
 -6 -6 -2 -2.4545 8.66596 3
 6 -6 2 -6.1815 5.98453 2
 6 6 2 9.92621 9.45997 3
 -6 6 -2 4.50192 8.11476 1
 -6 6 -2 -11.169 9.21285 3
 6 6 2 11.4214 12.1624 3
 -6 6 -2 2.38188 8.57071 3
 -7 -6 -2 14.4626 11.8242 3
 7 -6 2 17.6744 10.0061 3
 7 -6 2 16.2815 9.80737 3
 7 -6 2 26.3526 7.77467 2
 -7 -6 -2 29.6292 10.2403 3
 -7 6 -2 41.5519 9.97687 1
 -7 6 -2 19.4664 9.54568 3
 7 6 2 15.0575 13.054 3
 -7 6 -2 46.9179 11.5685 3
 7 6 2 24.4787 19.4333 3
 -8 -6 -2 47.3475 11.2181 3
 8 -6 2 58.3755 11.8199 3
 8 -6 2 48.7634 8.78253 2
 -8 -6 -2 39.9481 14.4084 3
 8 -6 2 22.569 11.5444 3
 -8 6 -2 39.9309 12.6001 3
 -8 6 -2 37.944 10.2681 1
 8 6 2 48.0308 11.96 3
 8 6 2 58.5573 13.5735 3
 -8 6 -2 23.1506 10.4067 3
 9 -6 2 9.62891 11.1469 3
 -9 -6 -2 29.4557 10.784 3
 9 -6 2 6.64794 12.0406 3
 9 -6 2 47.3374 9.91102 2
 -9 -6 -2 44.812 14.4438 3
 9 6 2 25.9829 11.8096 3
 -9 6 -2 10.1198 10.2732 1
 9 6 2 24.0504 14.8611 3
 -9 6 -2 6.80905 12.5968 3
 -9 6 -2 14.8357 10.5928 3
 10 -6 2 17.3942 11.7238 3
 -10 -6 -2 21.9169 16.5821 3
 -10 -6 -2 17.5516 11.8704 3
 10 -6 2 13.0316 13.2884 3
 -10 6 -2 14.6551 11.4769 1
 10 6 2 15.2715 15.9205 3
 -10 6 -2 -10.378 12.9508 3
 10 6 2 2.9683 12.7978 3
 -10 6 -2 0.35681 10.5011 3
 11 -6 2 54.9823 15.7413 3
 -11 -6 -2 14.5475 17.5031 3
 11 -6 2 48.4463 14.2183 3
 -11 -6 -2 -6.5768 11.9045 3
 -11 6 -2 -9.0074 14.347 3
 11 6 2 53.2972 18.843 3
 -11 6 -2 13.1465 12.5851 3
 -11 6 -2 30.5462 12.8847 1
 11 6 2 21.3279 13.2068 3
 -12 -6 -2 16.7174 14.0571 3
 12 -6 2 -5.2172 12.8862 3
 -12 -6 -2 6.90954 20.4833 3
 12 -6 2 6.85472 15.8929 3
 12 6 2 15.9139 18.9922 3
 -12 6 -2 -9.9864 16.5808 3
 -12 6 -2 11.1423 12.8899 3
 12 6 2 17.3519 14.9099 3
 -12 6 -2 35.0853 14.0137 1
 -11 -7 2 -32.776 18.7486 3
 11 -7 -2 4.28854 9.61202 2
 -11 -7 2 10.4284 6.27225 1
 11 -7 -2 -16.324 13.6752 3
 11 -7 -2 6.77955 14.8558 3
 -11 -7 2 -10.044 13.1549 3
 11 7 -2 14.2081 20.3539 3
 -11 7 2 -4.7337 16.771 3
 -11 7 2 11.2093 14.1135 3
 11 7 -2 -3.3892 16.0201 3
 -11 7 2 -4.1181 13.9315 1
 -10 -7 2 -3.0815 12.5813 3
 10 -7 -2 -6.4667 12.1853 3
 10 -7 -2 8.25865 13.7482 3
 -10 -7 2 14.0448 19.5225 3
 -10 7 2 7.51208 12.709 3
 10 7 -2 -10.9 17.5333 3
 -10 7 2 -16.994 13.6576 3
 -10 7 2 -12.541 12.6918 1
 10 7 -2 -19.76 13.0335 3
 9 -7 -2 4.49006 13.3316 3
 9 -7 -2 7.4019 11.5877 3
 -9 -7 2 4.37426 12.1921 3
 -9 7 2 16.7247 12.4354 3
 -9 7 2 22.9584 12.7628 1
 -9 7 2 19.9844 14.0836 3
 9 7 -2 35.8783 13.8473 3
 9 7 -2 19.6664 17.7669 3
 9 7 -2 21.0528 10.7227 2
 8 -7 -2 31.5214 11.7337 3
 8 -7 -2 4.65681 10.961 3
 -8 -7 2 -13.407 11.2407 3
 -8 7 2 6.18326 11.2519 1
 -8 7 2 -0.8211 12.8514 3
 -8 7 2 20.889 10.5079 3
 8 7 -2 48.2042 16.4478 3
 8 7 -2 -9.8557 11.8463 3
 8 7 -2 17.1176 9.82029 2
 -7 -7 2 92.0254 13.2825 3
 -7 -7 2 104.362 13.9964 3
 7 -7 -2 109.254 14.186 3
 7 -7 -2 93.8748 14.2384 3
 7 7 -2 90.298 17.8256 3
 -7 7 2 110.421 16.326 1
 7 7 -2 89.0854 13.8753 3
 7 7 -2 103.172 18.0862 2
 -7 7 2 84.5569 14.9332 3
 6 -7 -2 8.10911 10.6265 3
 -6 -7 2 3.30547 10.2854 3
 6 -7 -2 15.7092 11.5049 3
 -6 -7 2 4.47098 10.6733 3
 -6 7 2 16.8084 12.4374 3
 -6 7 2 -0.3227 9.45724 1
 6 7 -2 11.9615 14.9456 3
 -6 7 2 -2.7174 13.195 3
 6 7 -2 -1.9551 10.9258 3
 6 7 -2 7.79199 8.18191 2
 -5 -7 2 63.5401 11.8731 3
 5 -7 -2 80.8556 12.7925 3
 -5 -7 2 69.5241 11.7162 3
 5 -7 -2 56.4042 11.9684 3
 5 7 -2 67.963 15.6332 3
 -5 7 2 46.5175 13.0236 3
 -5 7 2 69.6828 14.7963 3
 5 7 -2 41.9977 11.7101 3
 5 7 -2 68.654 8.98693 2
 -4 -7 2 5.68201 9.65159 3
 4 -7 -2 3.29057 9.14733 1
 4 -7 -2 3.55222 9.47553 3
 4 -7 -2 9.74023 9.60123 3
 -4 -7 2 7.00164 9.84351 3
 4 7 -2 16.051 10.4549 3
 -4 7 2 10.7053 11.5541 3
 -4 7 2 26.1103 12.9583 3
 4 7 -2 -26.549 13.0555 3
 4 7 -2 -3.1635 6.82159 2
 -3 -7 2 103.529 12.2496 3
 3 -7 -2 89.4313 12.885 3
 3 -7 -2 101.61 11.0636 1
 3 -7 -2 98.3103 11.8989 3
 -3 -7 2 89.5045 12.4198 3
 -3 7 2 56.4238 14.571 3
 -3 7 2 79.4869 13.3656 3
 3 7 -2 87.4814 8.80508 2
 3 7 -2 92.1687 14.8095 3
 3 7 -2 92.0767 13.3825 3
 2 -7 -2 9.83824 7.9342 1
 -2 -7 2 -11.355 9.51196 3
 2 -7 -2 0.95537 9.94116 3
 -2 -7 2 3.64466 11.2262 3
 2 7 -2 3.90301 12.4842 3
 2 7 -2 -4.4747 6.3726 2
 -2 7 2 20.707 10.4276 3
 -2 7 2 -7.9201 11.4463 3
 2 7 -2 16.2135 10.6107 3
 -1 -7 2 66.5434 10.9218 3
 -1 -7 2 67.5497 11.9869 3
 1 -7 -2 42.1982 10.3354 3
 1 -7 -2 58.1985 11.5516 3
 1 -7 -2 52.0209 8.40871 1
 1 7 -2 49.3714 13.664 3
 1 7 -2 63.3642 7.54561 2
 -1 7 2 64.7563 11.7556 3
 -1 7 2 58.8288 14.8316 3
 1 7 -2 59.2588 12.2476 3
 0 -7 2 23.7627 9.77313 3
 0 -7 -2 23.008 6.93371 1
 0 -7 -2 9.2529 9.97071 3
 0 -7 2 23.2702 10.71 3
 0 -7 -2 16.6669 9.9537 3
 0 7 2 20.1318 10.3659 3
 0 7 -2 16.2673 13.3877 3
 0 7 2 4.26278 16.5336 3
 0 7 -2 20.4348 10.1703 3
 -1 -7 -2 51.5573 10.6984 3
 1 -7 2 33.8312 10.3983 3
 -1 -7 -2 45.0411 10.7873 3
 1 -7 2 39.807 10.2094 3
 -1 -7 -2 48.2227 7.22917 1
 1 7 2 47.2309 11.0941 3
 -1 7 -2 43.5598 10.9324 3
 1 7 2 25.9142 13.1243 3
 -1 7 -2 24.0241 12.9973 3
 2 -7 2 -7.9662 8.9301 3
 2 -7 2 5.64815 9.90109 3
 -2 -7 -2 -4.6903 9.27571 3
 -2 -7 -2 -6.8821 9.33288 3
 -2 -7 -2 8.61606 6.06223 1
 2 7 2 8.34111 12.5559 3
 2 7 2 4.27135 9.81795 3
 -2 7 -2 -0.0353 12.231 3
 -2 7 -2 -2.4879 10.3465 3
 -3 -7 -2 63.0475 11.2235 3
 -3 -7 -2 65.1935 7.26979 1
 3 -7 2 77.3875 12.3921 3
 3 -7 2 62.7538 10.898 3
 -3 -7 -2 77.6012 12.1031 3
 3 7 2 88.161 15.1769 3
 3 7 2 56.5738 11.7319 3
 3 7 2 57.2453 7.06705 2
 -3 7 -2 64.7161 12.8157 3
 -3 7 -2 80.6807 16.0019 3
 -4 -7 -2 -13.017 15.9274 3
 4 -7 2 26.958 12.0394 3
 4 -7 2 6.40335 10.8266 3
 -4 -7 -2 2.45754 5.92584 1
 -4 -7 -2 6.55587 9.7873 3
 -4 7 -2 7.26373 10.8639 3
 4 7 2 0.48023 9.94668 3
 4 7 2 0.14874 6.00002 2
 4 7 2 23.1077 13.5391 3
 -4 7 -2 11.0895 8.08034 1
 5 -7 2 24.2935 6.06826 2
 5 -7 2 -0.4275 10.4536 3
 -5 -7 -2 9.81549 10.5654 3
 -5 -7 -2 17.1502 6.00312 1
 5 -7 2 21.0747 10.9391 3
 -5 -7 -2 19.8419 11.3129 3
 -5 7 -2 28.1022 8.92081 1
 -5 7 -2 24.9039 10.4399 3
 -5 7 -2 1.04993 11.8324 3
 5 7 2 24.4166 7.29814 2
 5 7 2 10.6774 15.7104 3
 6 -7 2 95.5661 10.4915 2
 6 -7 2 103.905 13.7892 3
 6 -7 2 80.7953 14.0241 3
 -6 -7 -2 86.9153 13.4599 3
 -6 -7 -2 86.872 10.1671 1
 6 7 2 83.3846 14.1196 3
 -6 7 -2 92.4925 13.0425 3
 -6 7 -2 101.227 14.8006 3
 6 7 2 94.4258 16.8396 3
 -6 7 -2 79.159 11.7647 1
 6 7 2 93.9137 12.6254 2
 7 -7 2 3.34066 11.7826 3
 7 -7 2 9.48799 7.45054 2
 7 -7 2 12.1725 11.8869 3
 -7 -7 -2 10.141 11.3315 3
 -7 -7 -2 27.9881 17.1242 3
 -7 7 -2 9.73932 13.3532 3
 7 7 2 22.2329 15.3007 3
 -7 7 -2 15.2002 11.2084 3
 -7 7 -2 3.83495 9.84381 1
 7 7 2 0.63965 12.4221 3
 8 -7 2 59.1754 9.13849 2
 8 -7 2 45.5084 13.9144 3
 -8 -7 -2 37.3322 12.8025 3
 8 -7 2 39.4394 12.7154 3
 -8 -7 -2 39.549 17.64 3
 -8 7 -2 32.8381 14.3658 3
 -8 7 -2 50.0907 12.506 1
 8 7 2 53.5652 17.5677 3
 8 7 2 46.3581 14.6899 3
 -8 7 -2 23.4362 12.2282 3
 9 -7 2 31.9771 14.6431 3
 -9 -7 -2 87.1114 15.4698 3
 9 -7 2 40.6557 14.6142 3
 9 -7 2 44.4121 9.99741 2
 -9 -7 -2 34.7617 18.6315 3
 -9 7 -2 71.7 13.9853 3
 9 7 2 50.9052 18.7422 3
 9 7 2 59.4953 14.6081 3
 -9 7 -2 94.4957 16.6311 3
 -9 7 -2 64.4826 13.5142 1
 10 -7 2 80.6286 16.6493 3
 10 -7 2 0.02523 12.8259 3
 -10 -7 -2 7.25221 17.2652 3
 -10 -7 -2 8.58869 13.7275 3
 10 -7 2 32.9977 10.7943 2
 -10 7 -2 4.19727 13.4033 3
 10 7 2 30.3567 15.4406 3
 -10 7 -2 41.06 16.8879 3
 -10 7 -2 21.1342 13.607 1
 10 7 2 -5.2551 23.2031 3
 8 -8 -2 21.8544 14.5568 3
 -8 -8 2 15.7117 13.869 3
 -8 -8 2 9.06694 14.9728 3
 8 -8 -2 22.5318 15.0254 3
 8 8 -2 46.6972 20.3631 3
 -8 8 2 17.9735 17.0079 3
 -8 8 2 -1.4781 19.1731 3
 8 8 -2 11.882 14.7035 3
 8 8 -2 25.7561 11.5586 2
 7 -8 -2 -2.1676 12.9605 3
 -7 -8 2 -9.0975 12.5376 3
 -7 -8 2 -0.2494 13.3397 3
 7 -8 -2 -24.724 13.6882 3
 -7 8 2 44.3509 17.6014 3
 -7 8 2 -3.4606 15.2673 3
 7 8 -2 1.84979 14.2252 3
 7 8 -2 35.1783 10.5309 2
 7 8 -2 11.3517 18.1596 3
 -6 -8 2 71.5577 13.766 3
 -6 -8 2 54.1185 14.21 3
 6 -8 -2 86.0487 15.9265 3
 6 -8 -2 68.201 14.3814 3
 -6 8 2 73.2616 17.7501 3
 6 8 -2 30.8358 14.2729 3
 6 8 -2 62.5368 10.843 2
 -6 8 2 56.7243 15.4651 3
 6 8 -2 20.4603 18.0921 3
 5 -8 -2 17.043 12.7775 3
 -5 -8 2 -22.766 11.7836 3
 -5 -8 2 11.9982 12.1765 3
 5 -8 -2 -11.28 12.7769 3
 5 8 -2 -3.5998 16.4554 3
 5 8 -2 0.62768 12.6441 3
 5 8 -2 9.9632 9.10314 2
 -5 8 2 -31.722 13.3624 3
 -5 8 2 12.9072 15.4791 3
 -4 -8 2 102.7 14.6022 3
 4 -8 -2 62.9442 13.6777 3
 -4 -8 2 105.565 15.0665 3
 4 -8 -2 71.4031 14.3308 3
 4 8 -2 63.0187 9.92319 2
 -4 8 2 84.266 18.8916 3
 4 8 -2 61.2289 18.5447 3
 -4 8 2 62.7382 15.1118 3
 4 8 -2 60.0548 14.6263 3
 3 -8 -2 -16.47 11.0068 3
 3 -8 -2 7.88591 12.9475 3
 -3 -8 2 -0.635 12.3785 3
 -3 -8 2 4.94385 12.4139 3
 -3 8 2 -23.382 15.1722 3
 3 8 -2 -1.1644 7.99191 2
 3 8 -2 16.215 27.5683 3
 -3 8 2 9.23306 13.8065 3
 3 8 -2 -11.677 12.2607 3
 2 -8 -2 13.9432 12.614 3
 2 -8 -2 28.6926 11.5617 3
 -2 -8 2 14.8798 12.2135 3
 2 -8 -2 18.7898 9.81917 1
 -2 -8 2 24.1451 11.5446 3
 -2 8 2 32.2537 15.8752 3
 2 8 -2 22.0584 12.8781 3
 2 8 -2 20.9531 17.8326 3
 -2 8 2 35.2634 13.0654 3
 2 8 -2 27.5508 8.25067 2
 -1 -8 2 1.37265 11.702 3
 1 -8 -2 17.3302 9.32882 1
 1 -8 -2 14.4377 11.1417 3
 1 -8 -2 -3.7181 11.321 3
 -1 -8 2 7.80908 12.0046 3
 -1 8 2 16.0571 12.1206 3
 -1 8 2 -8.2802 14.7906 3
 1 8 -2 -16.86 14.8058 3
 1 8 -2 0.57992 12.5691 3
 0 -8 2 63.7488 16.5153 3
 0 -8 2 96.9039 14.5325 3
 0 -8 -2 88.7015 13.6384 3
 0 -8 -2 108.386 14.9074 3
 0 -8 -2 98.5488 10.4287 1
 0 8 -2 121.705 16.5169 3
 0 8 -2 78.138 17.3589 3
 0 8 2 97.0905 14.9062 3
 0 8 2 85.7756 17.4257 3
 1 -8 2 -6.0506 11.4856 3
 -1 -8 -2 -20.415 11.3074 3
 -1 -8 -2 34.817 20.5518 3
 -1 -8 -2 -0.9231 7.52053 1
 1 -8 2 4.57329 11.0333 3
 1 8 2 18.0807 14.9109 3
 -1 8 -2 -0.4369 20.7183 3
 -1 8 -2 -28.254 15.0352 3
 1 8 2 -4.3168 12.1953 3
 -2 -8 -2 10.9437 7.04902 1
 -2 -8 -2 -1.6167 10.6928 3
 -2 -8 -2 37.0943 12.3381 3
 2 -8 2 5.47636 11.3847 3
 2 -8 2 0.69257 11.9302 3
 2 8 2 4.29666 15.8393 3
 -2 8 -2 29.0396 13.7533 3
 -2 8 -2 -16.143 15.0904 3
 2 8 2 12.8826 19.4146 3
 -3 -8 -2 59.1574 7.69666 1
 -3 -8 -2 29.6785 12.2287 3
 3 -8 2 74.7709 17.5299 3
 3 -8 2 63.4457 13.3268 3
 -3 -8 -2 64.8854 14.2371 3
 -3 8 -2 66.3961 16.8958 3
 -3 8 -2 37.6025 13.5589 3
 3 8 2 27.9883 13.7866 3
 3 8 2 76.4483 18.0723 3
 -4 -8 -2 55.396 7.85677 1
 -4 -8 -2 55.7134 12.862 3
 4 -8 2 56.3669 21.4681 3
 -4 -8 -2 40.4083 13.4509 3
 4 -8 2 39.0652 13.647 3
 -4 8 -2 53.0595 15.2644 3
 4 8 2 55.1729 8.56367 2
 -4 8 -2 85.1356 18.873 3
 4 8 2 55.7277 14.3312 3
 4 8 2 44.8871 18.2721 3
 -5 -8 -2 19.5497 13.0453 3
 -5 -8 -2 46.3145 7.35666 1
 5 -8 2 28.0552 13.5418 3
 -5 -8 -2 40.9 13.1503 3
 5 -8 2 39.2933 19.5875 3
 5 8 2 44.6216 8.67032 2
 5 8 2 48.0207 14.4297 3
 -5 8 -2 40.7349 19.0518 3
 -5 8 -2 39.3505 15.0876 3
 5 8 2 48.1173 19.2846 3
 -6 -8 -2 75.5455 15.1708 3
 -6 -8 -2 132.53 16.749 3
 6 -8 2 91.3891 15.6302 3
 -6 -8 -2 112.92 11.1914 1
 6 -8 2 70.5789 18.4166 3
 -6 8 -2 107.703 13.4837 1
 -6 8 -2 114.095 21.3059 3
 -6 8 -2 146.095 18.6181 3
 6 8 2 106.512 18.562 3
 6 8 2 104.922 21.2285 3
 6 8 2 89.138 10.3963 2
 7 -8 2 20.3679 16.7042 3
 -7 -8 -2 26.353 7.48949 1
 -7 -8 -2 -2.1443 12.8596 3
 7 -8 2 7.63185 13.8854 3
 -7 -8 -2 10.7098 13.7161 3
 7 8 2 -9.717 14.2198 3
 -7 8 -2 -16.554 14.7323 3
 7 8 2 10.214 11.3482 2
 -7 8 -2 10.8341 11.255 1
 7 8 2 14.5535 17.9682 3
 -8 -8 -2 21.0837 7.72819 1
 8 -8 2 61.589 25.7191 3
 -8 -8 -2 44.4014 14.7846 3
 -8 -8 -2 45.3706 14.7242 3
 8 -8 2 31.0706 14.8123 3
 -8 8 -2 49.4194 17.2012 3
 -8 8 -2 43.1971 14.3397 3
 8 8 2 12.3781 19.635 3
 8 8 2 16.3623 15.7835 3
 8 8 2 38.0779 11.3296 2
 -8 8 -2 7.78768 12.5676 1
 -3 -9 2 4.65529 14.3306 3
 3 -9 -2 -7.8514 14.0716 3
 3 -9 -2 -4.4128 13.7155 3
 -3 -9 2 16.8334 14.8937 3
 -3 9 2 4.65207 20.0423 3
 3 9 -2 -34.846 19.6664 3
 -3 9 2 -35.139 17.6319 3
 2 -9 -2 41.0716 15.8227 3
 -2 -9 2 53.0186 15.5297 3
 -2 -9 2 13.0271 15.3583 3
 2 -9 -2 3.80101 14.8307 3
 -2 9 2 13.3801 20.2853 3
 2 9 -2 48.2376 20.338 3
 2 9 -2 11.2361 15.5479 3
 -2 9 2 -25.139 20.6597 3
 1 -9 -2 -3.088 14.1486 3
 1 -9 -2 -1.0813 13.4766 3
 -1 -9 2 -6.7286 14.2816 3
 -1 -9 2 17.3381 13.5993 3
 -1 9 2 -32.1 17.3471 3
 -1 9 2 12.4189 14.8916 3
 1 9 -2 14.0114 15.0069 3
 1 9 -2 -18.586 18.9938 3
 0 -9 2 14.9211 15.0358 3
 0 -9 -2 16.9867 15.3899 3
 0 -9 2 13.1658 15.8479 3
 0 -9 -2 -35.43 14.6284 3
 0 9 2 2.45452 17.4673 3
 0 9 2 -4.8027 14.8846 3
 0 9 -2 -13.603 20.3821 3
 0 9 -2 7.45598 16.0501 3
 1 -9 2 -7.2296 13.0889 3
 1 -9 2 4.80351 15.3575 3
 -1 -9 -2 9.27137 9.70708 1
 -1 -9 -2 4.90488 14.8449 3
 -1 -9 -2 -14.249 14.159 3
 -1 9 -2 -4.7278 16.8443 3
 -1 9 -2 -15.942 17.7432 3
 1 9 2 17.1322 20.8444 3
 1 9 2 -15.104 15.3107 3
 2 -9 2 17.6035 15.3218 3
 -2 -9 -2 27.2223 14.4981 3
 -2 -9 -2 2.33812 9.12398 1
 -2 -9 -2 -1.2285 13.6565 3
 2 -9 2 -11.351 13.6517 3
 2 9 2 7.04205 17.0095 3
 -2 9 -2 -14.579 16.4847 3
 2 9 2 -8.6983 18.6001 3
 -2 9 -2 -18.295 20.7501 3
 -3 -9 -2 5.46771 8.58875 1
 3 -9 2 -8.2659 15.3662 3
 3 -9 2 15.525 13.9592 3
 -3 -9 -2 3.43152 14.8212 3
 -3 -9 -2 19.608 13.8012 3
 3 9 2 -4.8729 20.6468 3
 3 9 2 29.0028 17.5427 3
 -3 9 -2 -8.5485 17.3407 3
 -3 9 -2 -2.7614 19.0924 3
 17 0 -3 -30.951 14.4758 3
 17 0 -3 -7.9692 12.6468 3
 -17 0 3 -4.0869 12.1781 1
 -16 0 3 13.6937 11.1004 1
 -16 0 3 -1.5049 13.154 3
 -16 0 3 10.1902 10.2465 3
 16 0 -3 -14.623 13.0899 3
 16 0 -3 17.7206 11.0668 3
 -15 0 3 -2.5576 8.99997 3
 15 0 -3 10.384 11.8836 3
 -15 0 3 4.74474 9.79956 1
 15 0 -3 6.2569 9.51577 3
 -15 0 3 10.7961 11.514 3
 -14 0 3 6.46977 8.14903 3
 -14 0 3 27.9705 11.662 3
 14 0 -3 4.78281 9.29023 3
 14 0 -3 -0.8145 10.5879 3
 -14 0 3 3.08845 9.11353 1
 -13 0 3 -9.328 8.34025 1
 -13 0 3 12.8303 7.90077 3
 13 0 -3 2.89898 9.63449 3
 -13 0 3 11.2562 10.1583 3
 13 0 -3 0.56921 8.18245 3
 -12 0 3 1.90075 8.46757 1
 12 0 -3 6.37195 9.02915 3
 -12 0 3 4.72052 6.99386 3
 -12 0 3 -1.9503 9.08858 3
 12 0 -3 -12.288 6.81248 3
 -11 0 3 19.7989 8.67731 3
 11 0 -3 9.72748 6.95195 3
 -11 0 3 10.5821 7.41054 1
 -11 0 3 14.6198 7.15939 3
 11 0 -3 23.9542 8.67045 3
 -10 0 3 8.48109 6.40671 1
 -10 0 3 -1.1927 5.77563 3
 -10 0 3 5.88276 7.80051 3
 10 0 -3 3.61259 6.02572 3
 10 0 -3 3.69333 7.69666 3
 9 0 -3 16.6686 7.06276 3
 -9 0 3 2.80323 5.52609 1
 9 0 -3 9.95677 5.41887 3
 -9 0 3 9.7656 5.34293 3
 -8 0 3 5.4363 4.81566 3
 -8 0 3 4.39774 5.31643 1
 8 0 -3 1.02595 4.65851 3
 8 0 -3 6.10988 6.1759 3
 7 0 -3 3.0596 4.64623 3
 -7 0 3 -4.2546 4.61116 1
 7 0 -3 5.12267 5.72008 3
 -7 0 3 5.99305 4.49057 3
 -6 0 3 7.01516 4.21326 3
 6 0 -3 13.4244 6.23791 3
 -6 0 3 1.0235 4.58651 1
 6 0 -3 1.53517 4.08738 3
 -5 0 3 -3.7785 4.06377 1
 5 0 -3 0.43344 3.70855 3
 5 0 -3 0.06807 5.44507 3
 -5 0 3 -2.4968 3.58084 3
 -5 0 3 -2.7111 3.36623 3
 -4 0 3 -7.8143 3.47634 1
 -4 0 3 -0.9974 3.2497 3
 4 0 -3 1.50993 4.33788 3
 -4 0 3 -6.5332 3.42887 3
 4 0 -3 -5.8769 3.23988 3
 4 0 -3 -3.0264 3.5932 1
 3 0 -3 -8.6357 3.28422 1
 -3 0 3 -3.5844 3.51178 1
 3 0 -3 2.79133 2.82713 3
 2 0 -3 6.96699 2.65619 1
 -2 0 3 4.98967 2.83957 1
 1 0 -3 1.38648 1.95912 2
 -1 0 3 0.14218 2.04005 2
 0 0 3 -1.943 2.20831 3
 0 0 3 -6.0454 2.18266 2
 0 0 -3 -3.3977 2.36051 3
 0 0 -3 -8.0755 1.75353 3
 0 0 -3 -6.7085 1.93107 2
 -1 0 -3 6.05777 2.69932 3
 1 0 3 5.61299 3.07024 3
 3 0 3 5.58756 4.57918 3
 3 0 3 4.6011 5.35608 3
 -3 0 -3 3.52954 5.42446 3
 -3 0 -3 5.17479 4.3456 3
 -4 0 -3 4.96861 4.49948 3
 -4 0 -3 6.68434 5.9056 3
 4 0 3 8.72393 5.55291 3
 4 0 3 9.05456 4.59066 3
 -5 0 -3 -2.0643 6.17104 3
 -5 0 -3 1.89913 4.62808 3
 5 0 3 1.25185 5.04214 3
 5 0 3 -0.8427 6.16244 3
 -6 0 -3 -4.6442 6.45615 3
 6 0 3 1.06087 6.49293 3
 -6 0 -3 -1.3794 4.96446 3
 6 0 3 4.0285 5.03215 3
 7 0 3 6.35075 5.48587 3
 -7 0 -3 12.2995 5.75975 3
 -7 0 -3 5.86309 6.60504 3
 7 0 3 2.29201 6.62875 3
 -8 0 -3 -2.7621 7.30051 3
 8 0 3 -8.0437 5.30603 3
 8 0 3 -0.938 7.34138 3
 -8 0 -3 -6.016 5.60713 3
 9 0 3 15.0968 8.271 3
 9 0 3 5.4796 6.38798 3
 -9 0 -3 13.1718 8.25223 3
 -9 0 -3 2.43849 6.08003 3
 10 0 3 3.32097 6.85931 3
 -10 0 -3 -12.959 8.05664 3
 10 0 3 6.67077 8.82321 3
 -10 0 -3 9.55854 7.03616 3
 -11 0 -3 0.71181 9.53153 3
 11 0 3 8.05602 7.69695 3
 -11 0 -3 2.92274 7.8884 3
 11 0 3 -0.9194 9.75733 3
 12 0 3 12.291 8.94045 3
 -12 0 -3 20.3071 11.4321 3
 -12 0 -3 32.0428 9.23331 3
 12 0 3 22.0407 11.4729 3
 13 0 3 1.26741 11.4829 3
 -13 0 -3 -11.26 11.0467 3
 -13 0 -3 -6.6467 9.3949 1
 -13 0 -3 10.3982 9.53613 3
 13 0 3 1.09301 8.92446 3
 14 0 3 8.44627 12.8478 3
 -14 0 -3 -17.964 9.42317 1
 -14 0 -3 -1.7724 12.5056 3
 14 0 3 -9.4709 9.65255 3
 -14 0 -3 4.165 10.5394 3
 15 0 3 17.197 14.3911 3
 15 0 3 -9.0974 10.6652 3
 -15 0 -3 6.07256 11.3218 3
 -15 0 -3 -15.908 10.8359 1
 -15 0 -3 -9.0587 13.9131 3
 -16 0 -3 3.39394 12.8581 1
 16 0 3 -24.831 14.7449 3
 -16 0 -3 9.60894 12.4025 3
 -16 0 -3 17.8953 16.1146 3
 16 0 3 -8.1687 11.7328 3
 16 -1 -3 47.0923 15.2526 3
 -16 -1 3 73.3739 15.2295 3
 16 -1 -3 66.9054 12.6624 3
 -16 -1 3 50.564 12.2544 3
 16 1 -3 54.9935 12.565 3
 -16 1 3 14.919 15.12 3
 16 1 -3 48.3662 15.2381 3
 -16 1 3 61.9075 13.4103 1
 -16 1 3 51.8037 10.9619 3
 -15 -1 3 118.945 17.1326 1
 15 -1 -3 179.626 21.3323 3
 15 -1 -3 156.563 17.6675 3
 -15 -1 3 160.206 20.9288 3
 -15 -1 3 187.019 17.2711 3
 15 1 -3 171.991 18.0977 3
 -15 1 3 142.518 18.2047 1
 15 1 -3 149.176 18.025 3
 -15 1 3 141.382 15.7718 3
 -15 1 3 142.534 16.6988 3
 -14 -1 3 115.437 14.4409 3
 -14 -1 3 111.91 11.6674 3
 14 -1 -3 118.687 12.3742 3
 -14 -1 3 111.018 16.2702 1
 14 -1 -3 125.998 14.3181 3
 14 1 -3 98.4011 13.6213 3
 -14 1 3 107.264 13.5982 3
 -14 1 3 119.445 17.1749 1
 -14 1 3 109.231 14.3983 3
 14 1 -3 134.566 16.2742 3
 -13 -1 3 5.41295 8.0225 3
 -13 -1 3 1.15683 8.16893 1
 -13 -1 3 2.20465 10.536 3
 13 -1 -3 17.8187 9.95057 3
 13 -1 -3 10.3072 8.88041 3
 13 1 -3 -4.9911 9.97887 3
 -13 1 3 -9.9281 7.99677 1
 -13 1 3 8.79331 10.3106 3
 13 1 -3 -5.3321 8.10477 3
 -13 1 3 12.252 7.9244 3
 -12 -1 3 89.0346 12.0838 3
 12 -1 -3 97.5669 11.5653 3
 -12 -1 3 93.8411 12.6388 3
 12 -1 -3 93.8515 9.90622 3
 -12 -1 3 103.008 13.5262 1
 -12 1 3 91.1141 11.7392 3
 12 1 -3 90.4317 11.9221 3
 -12 1 3 85.7588 11.1875 1
 -12 1 3 88.3086 9.53482 3
 12 1 -3 95.3032 10.3786 3
 -11 -1 3 82.1702 11.1047 3
 11 -1 -3 88.3633 10.4615 3
 11 -1 -3 102.264 11.808 3
 -11 -1 3 91.4766 12.1885 1
 -11 -1 3 74.1286 14.8689 3
 -11 1 3 85.014 10.7485 3
 11 1 -3 83.4672 10.7073 3
 -11 1 3 96.4549 10.5611 1
 11 1 -3 79.3223 9.26026 3
 -10 -1 3 566.283 19.8154 1
 -10 -1 3 576.381 19.979 3
 -10 -1 3 577.766 22.3422 3
 10 -1 -3 561.575 21.4961 3
 10 -1 -3 573.278 19.8374 3
 10 1 -3 550.988 19.9668 3
 -10 1 3 591.252 21.289 1
 -10 1 3 547.296 21.7801 3
 -10 1 3 574.342 19.5647 3
 10 1 -3 579.222 22.063 3
 9 -1 -3 119.437 12.3262 3
 9 -1 -3 123.575 10.2929 3
 -9 -1 3 100.6 10.3952 3
 -9 -1 3 128.216 12.7765 3
 -9 -1 3 103.938 9.7494 1
 9 1 -3 96.3345 12.7975 3
 -9 1 3 113.651 9.46001 3
 -9 1 3 115.811 11.164 1
 9 1 -3 102.645 10.2277 3
 -8 -1 3 349.15 14.1009 3
 -8 -1 3 319.782 17.3919 3
 -8 -1 3 372.404 13.9424 1
 8 -1 -3 366.48 15.218 3
 8 -1 -3 340.217 13.8834 3
 8 1 -3 342.459 13.8534 3
 -8 1 3 335.993 13.2073 3
 8 1 -3 357.109 15.5616 3
 -8 1 3 356.684 14.8544 1
 7 -1 -3 236.525 11.9439 3
 -7 -1 3 235.893 10.9109 3
 -7 -1 3 222.936 10.8017 1
 7 -1 -3 220.261 10.7019 3
 7 1 -3 223.268 10.6445 3
 -7 1 3 235.076 10.3794 3
 7 1 -3 260.113 12.9916 3
 -6 -1 3 4208.99 99.1245 3
 6 -1 -3 4319.67 99.6761 3
 6 -1 -3 3987.17 98.8095 3
 -6 -1 3 4270.47 99.2225 1
 -6 1 3 4193.46 98.8358 3
 6 1 -3 4129.23 99.1146 3
 6 1 -3 4423.45 100.041 3
 -6 1 3 4277.49 100.07 1
 -5 -1 3 411.329 12.6428 1
 5 -1 -3 405.793 13.9433 1
 -5 -1 3 414.967 12.7224 3
 5 -1 -3 385.09 12.4422 3
 -5 1 3 421.152 13.846 1
 5 1 -3 409.325 13.9238 3
 -5 1 3 398.82 12.4304 3
 5 1 -3 398.726 12.7677 3
 4 -1 -3 406.347 12.4264 3
 -4 -1 3 441.974 12.8237 3
 -4 -1 3 442.671 12.5107 1
 4 -1 -3 429.638 13.86 1
 4 1 -3 432.597 14.104 3
 4 1 -3 437.256 12.9015 3
 -4 1 3 462.122 13.9218 1
 -4 1 3 431.916 12.4307 3
 3 -1 -3 4203.67 97.8988 1
 3 -1 -3 4175.32 96.9881 3
 3 -1 -3 3966.85 97.7161 3
 -3 -1 3 4412.67 96.9009 1
 -3 -1 3 4302.78 97.2259 3
 -3 1 3 4434.35 98.0168 1
 3 1 -3 4212.77 97.2314 3
 -3 1 3 4197.19 96.9463 3
 3 1 -3 3940.93 98.5339 3
 -2 -1 3 7758.99 166.247 1
 2 -1 -3 7262.79 166.093 1
 -2 -1 3 7352.04 166.644 3
 2 -1 -3 6279.21 166.666 3
 2 -1 -3 6977.76 165.634 3
 -2 1 3 7721.56 166.583 1
 2 1 -3 7090.67 166.737 3
 2 1 -3 7465.45 166.658 1
 -2 1 3 7326.66 165.971 3
 2 1 -3 7032.11 165.935 3
 1 -1 -3 1.1284 2.72898 3
 1 -1 -3 0.63743 3.08969 1
 -1 -1 3 -2.3865 2.956 2
 -1 -1 3 0.3867 2.93405 3
 1 1 -3 -2.0127 2.94227 3
 1 1 -3 -2.2189 3.03201 2
 1 1 -3 -3.4052 2.54753 3
 -1 1 3 -2.0715 3.63549 3
 0 -1 -3 361.821 10.4351 3
 0 -1 3 370.755 10.5023 2
 0 -1 3 373.81 11.0298 3
 0 -1 -3 348.071 11.4056 3
 0 -1 3 395.519 10.5544 3
 0 1 -3 374.608 10.9906 3
 0 1 3 359.301 11.3792 3
 0 1 -3 383.613 10.4452 3
 0 1 3 344.759 10.6427 3
 0 1 -3 365.651 10.527 2
 1 -1 3 434.452 12.6972 3
 1 -1 3 451.575 13.2555 3
 -1 -1 -3 473.312 14.084 3
 -1 -1 -3 426.255 12.694 3
 1 1 3 422.29 12.7327 3
 -1 1 -3 432.339 13.3325 3
 1 1 3 462.273 13.8248 3
 -1 1 -3 447.499 12.6608 3
 2 -1 3 39.2556 4.6123 3
 2 -1 3 43.4377 5.29667 3
 -2 -1 -3 41.6937 5.52943 3
 -2 -1 -3 36.8792 4.43749 3
 2 1 3 42.0627 4.7342 3
 -2 1 -3 37.464 5.17373 3
 2 1 3 42.0734 5.56251 3
 -2 1 -3 35.9568 4.37654 3
 -3 -1 -3 2509.75 59.8041 3
 3 -1 3 2473.72 59.7229 3
 3 -1 3 2576.69 60.3679 3
 -3 -1 -3 2490.89 60.6791 3
 -3 1 -3 2477.97 60.3084 3
 3 1 3 2505.16 60.5138 3
 -3 1 -3 2530.63 59.7396 3
 3 1 3 2500.83 59.912 3
 -4 -1 -3 927.274 26.2706 3
 4 -1 3 897.073 24.6585 3
 -4 -1 -3 932.827 24.8862 3
 4 -1 3 906.101 25.6182 3
 -4 1 -3 945.002 24.7347 3
 -4 1 -3 908.423 25.7256 3
 4 1 3 927.477 24.962 3
 4 1 3 928.406 25.8881 3
 5 -1 3 114.128 8.90296 3
 -5 -1 -3 102.131 9.27333 3
 5 -1 3 100.151 10.8727 3
 -5 -1 -3 91.3147 8.69978 3
 -5 1 -3 96.2039 8.89063 3
 -5 1 -3 110.514 10.7893 3
 5 1 3 102.424 9.30904 3
 5 1 3 96.7884 11.2903 3
 -6 -1 -3 122.827 10.2964 3
 6 -1 3 97.1134 12.1362 3
 -6 -1 -3 98.9532 12.3219 3
 6 -1 3 101.679 9.85631 3
 6 1 3 120.778 10.2719 3
 -6 1 -3 130.01 11.8984 3
 -6 1 -3 125.186 9.7984 3
 6 1 3 122.585 12.2352 3
 -7 -1 -3 225.249 14.6072 3
 7 -1 3 225.705 14.6646 3
 7 -1 3 214.886 12.596 3
 -7 -1 -3 213.445 12.8721 3
 7 1 3 227.227 12.5731 3
 -7 1 -3 224.228 14.5297 3
 -7 1 -3 218.51 12.2218 3
 7 1 3 199.65 13.8465 3
 -8 -1 -3 429.941 17.3744 3
 -8 -1 -3 408.28 19.5044 3
 8 -1 3 422.328 17.2413 3
 8 -1 3 427.589 19.0881 3
 8 1 3 438.915 18.9204 3
 -8 1 -3 434.695 19.0048 3
 -8 1 -3 396.861 16.6204 3
 8 1 3 409.048 17.0918 3
 -9 -1 -3 420.54 20.3537 3
 9 -1 3 399.138 17.3093 3
 9 -1 3 421.665 20.0396 3
 -9 -1 -3 396.198 17.7769 3
 9 1 3 400.757 17.8015 3
 9 1 3 394.962 19.7787 3
 -9 1 -3 371.351 19.172 3
 -9 1 -3 413.321 17.1959 3
 -10 -1 -3 8.52238 9.07373 3
 -10 -1 -3 3.4205 7.34229 3
 10 -1 3 -13.911 8.39185 3
 10 -1 3 1.75644 7.10208 3
 -10 1 -3 -0.632 7.00602 3
 10 1 3 3.65253 7.61649 3
 10 1 3 0.01208 8.98049 3
 -10 1 -3 -9.6459 8.60636 3
 -11 -1 -3 19.6073 11.5668 3
 -11 -1 -3 15.8966 10.4866 3
 11 -1 3 34.0253 10.4119 3
 11 -1 3 15.3442 8.53518 3
 11 1 3 17.5537 8.50466 3
 -11 1 -3 15.7987 10.0869 3
 -11 1 -3 14.1753 8.52831 1
 11 1 3 6.56308 10.0909 3
 12 -1 3 46.8055 10.115 3
 12 -1 3 32.9113 11.2773 3
 -12 -1 -3 39.599 9.74313 3
 -12 -1 -3 49.0925 12.2791 3
 -12 1 -3 29.7483 11.6418 3
 12 1 3 57.234 12.6338 3
 -12 1 -3 30.5484 9.51321 1
 -12 1 -3 38.6656 9.73428 3
 12 1 3 29.6333 9.73076 3
 -13 -1 -3 80.4885 12.3807 3
 13 -1 3 84.9121 14.0745 3
 -13 -1 -3 65.4074 13.8875 3
 13 -1 3 98.2577 12.159 3
 13 1 3 96.8119 11.8122 3
 -13 1 -3 85.3976 12.5033 1
 -13 1 -3 86.6518 12.0715 3
 -13 1 -3 71.7454 13.7329 3
 13 1 3 82.5347 13.7905 3
 14 -1 3 40.0693 13.8143 3
 14 -1 3 54.3566 11.8609 3
 -14 -1 -3 40.2425 11.7885 1
 -14 -1 -3 11.7917 12.4676 3
 -14 -1 -3 43.4359 11.9806 3
 -14 1 -3 15.334 13.1726 3
 -14 1 -3 30.8425 11.5281 1
 14 1 3 29.2667 13.268 3
 -14 1 -3 28.8574 10.965 3
 14 1 3 20.1295 10.9519 3
 15 -1 3 25.2619 12.1163 3
 -15 -1 -3 22.7884 12.2433 3
 -15 -1 -3 43.1605 15.1926 3
 15 -1 3 41.9163 15.381 3
 -15 -1 -3 15.0652 11.8737 1
 -15 1 -3 47.0318 15.3605 3
 15 1 3 41.373 12.5213 3
 -15 1 -3 37.3664 12.492 3
 -15 1 -3 22.8991 12.113 1
 15 1 3 46.8486 16.3737 3
 16 -1 3 11.1896 16.4443 3
 -16 -1 -3 0.76544 12.5318 1
 16 -1 3 16.3817 12.8679 3
 -16 -1 -3 10.4202 13.834 3
 -16 -1 -3 6.52476 17.5585 3
 16 1 3 40.5421 13.6761 3
 -16 1 -3 64.0068 17.0896 3
 -16 1 -3 50.7729 14.4943 1
 16 1 3 37.7616 17.0715 3
 -16 1 -3 27.4463 13.532 3
 -16 -2 3 69.069 13.5145 3
 -16 -2 3 31.1562 16.8209 3
 16 -2 -3 37.8496 14.9188 3
 -16 -2 3 79.4504 13.2205 1
 16 -2 -3 46.1624 13.7241 3
 16 2 -3 52.7223 13.0514 3
 -16 2 3 57.1773 14.5962 1
 -16 2 3 32.8236 11.9348 3
 -16 2 3 27.895 15.235 3
 16 2 -3 43.8048 16.1139 3
 -15 -2 3 9.94723 13.583 3
 15 -2 -3 31.106 13.6224 3
 -15 -2 3 15.7541 10.3069 1
 15 -2 -3 27.6525 11.0678 3
 -15 -2 3 15.9533 10.6178 3
 15 2 -3 20.2888 14.2165 3
 -15 2 3 39.5058 13.5127 3
 -15 2 3 15.9417 10.465 3
 -15 2 3 30.6455 12.0077 1
 15 2 -3 29.5043 11.0171 3
 -14 -2 3 5.16646 11.8257 3
 14 -2 -3 29.1626 12.3259 3
 -14 -2 3 12.556 9.50028 1
 14 -2 -3 14.0005 9.33587 3
 -14 -2 3 16.4439 9.42821 3
 -14 2 3 2.88644 10.4937 1
 14 2 -3 -4.3042 11.4844 3
 -14 2 3 1.63221 11.3432 3
 -14 2 3 13.6308 8.77375 3
 14 2 -3 13.3946 10.1325 3
 -13 -2 3 117.642 18.4056 1
 13 -2 -3 119.788 15.0476 3
 -13 -2 3 136.217 16.2331 3
 13 -2 -3 124.592 13.8322 3
 -13 -2 3 119.884 14.408 3
 -13 2 3 117.609 16.0592 1
 -13 2 3 132.738 13.9999 3
 13 2 -3 138.87 16.2103 3
 -13 2 3 111.661 13.8867 3
 13 2 -3 136.691 14.566 3
 12 -2 -3 21.0186 9.90724 3
 -12 -2 3 34.224 10.8456 3
 -12 -2 3 24.8422 8.70475 3
 -12 -2 3 15.9383 7.53549 1
 12 -2 -3 5.26408 8.25985 3
 12 2 -3 10.4541 8.33212 3
 -12 2 3 -1.2178 8.40101 1
 -12 2 3 20.3429 7.89051 3
 12 2 -3 20.5183 10.8049 3
 -12 2 3 7.88086 9.75018 3
 -11 -2 3 20.7889 8.22642 3
 -11 -2 3 18.7199 6.96615 1
 11 -2 -3 21.3748 9.19476 3
 11 -2 -3 23.5637 13.2381 3
 -11 -2 3 23.0148 9.88338 3
 -11 2 3 9.20968 8.72075 1
 -11 2 3 27.8285 7.19575 3
 11 2 -3 29.9003 10.0096 3
 -11 2 3 10.3697 9.29212 3
 11 2 -3 32.4869 14.5146 3
 -10 -2 3 9.75332 8.39206 3
 -10 -2 3 12.1871 6.37438 1
 10 -2 -3 11.2609 8.13858 3
 -10 -2 3 10.9895 6.58441 3
 10 -2 -3 10.7482 6.74056 3
 -10 2 3 21.539 8.31642 3
 10 2 -3 19.9535 8.65535 3
 10 2 -3 7.07431 6.59971 3
 -10 2 3 7.19797 6.89265 1
 -10 2 3 15.1183 6.42118 3
 9 -2 -3 113.731 12.134 3
 -9 -2 3 87.4431 9.52332 1
 -9 -2 3 109.638 10.6421 3
 -9 -2 3 118.465 13.6006 3
 9 -2 -3 108.587 10.7811 3
 -9 2 3 108.14 10.0058 3
 9 2 -3 123.773 13.5704 3
 -9 2 3 117.785 12.7715 3
 9 2 -3 111.722 10.9446 3
 -9 2 3 104.881 11.4576 1
 8 -2 -3 5.38735 5.47585 3
 -8 -2 3 2.27359 4.7049 1
 -8 -2 3 13.9844 5.47795 3
 8 -2 -3 10.3027 6.45905 3
 -8 -2 3 8.07609 6.86757 3
 8 2 -3 17.7668 6.83955 3
 -8 2 3 3.31738 6.10134 3
 -8 2 3 5.80158 4.95797 3
 -8 2 3 6.28292 6.20837 1
 8 2 -3 8.04017 5.45592 3
 -7 -2 3 -5.808 4.14575 1
 7 -2 -3 6.67873 5.50799 3
 7 -2 -3 1.61783 4.70656 3
 -7 -2 3 8.169 6.43851 3
 -7 -2 3 -2.265 4.76272 3
 7 2 -3 1.94656 6.35523 3
 -7 2 3 4.93179 5.7435 3
 -7 2 3 2.80573 4.58619 3
 7 2 -3 4.91149 4.94156 3
 -7 2 3 -5.5813 5.2066 1
 -6 -2 3 600.362 18.149 3
 6 -2 -3 575.247 19.1602 1
 6 -2 -3 589.608 18.6344 3
 -6 -2 3 629.801 20.0659 3
 6 -2 -3 552.379 17.4907 3
 -6 -2 3 548.801 16.7103 1
 6 2 -3 564.409 18.0978 3
 -6 2 3 602.919 19.0531 1
 -6 2 3 569.188 17.5376 3
 6 2 -3 641.518 19.9854 3
 -6 2 3 569.634 19.0148 3
 5 -2 -3 344.194 12.8952 3
 5 -2 -3 323.187 13.1529 1
 -5 -2 3 340.703 14.2666 3
 -5 -2 3 315.099 10.4863 1
 5 -2 -3 324.825 11.8157 3
 -5 -2 3 329.272 12.2304 3
 -5 2 3 327.509 13.253 1
 5 2 -3 318.995 12.2662 3
 -5 2 3 306.163 14.2311 3
 -5 2 3 326.839 11.6353 3
 5 2 -3 345.663 14.0216 3
 -4 -2 3 219.263 9.74239 3
 -4 -2 3 226.815 11.7689 3
 4 -2 -3 210.997 9.23596 3
 4 -2 -3 224.132 10.3246 3
 -4 -2 3 216.977 7.40538 1
 4 -2 -3 207.973 10.3211 1
 -4 2 3 222.093 10.5006 3
 -4 2 3 213.412 9.15106 3
 4 2 -3 229.507 11.8602 3
 4 2 -3 217.511 10.0145 3
 -4 2 3 209.51 10.24 1
 3 -2 -3 3690.44 86.5435 3
 3 -2 -3 3577.27 86.7146 1
 3 -2 -3 3559.56 86.1277 3
 -3 -2 3 3600.48 84.6404 1
 -3 -2 3 3833.04 87.4564 3
 -3 -2 3 3712.21 86.5285 3
 -3 2 3 3635.47 86.5847 3
 3 2 -3 3918.52 87.4171 3
 -3 2 3 3635.17 86.0663 3
 3 2 -3 3792.56 86.6811 3
 -3 2 3 3626.06 86.753 1
 2 -2 -3 9780.11 226.944 3
 2 -2 -3 9695.94 227.505 1
 2 -2 -3 9718 226.635 3
 -2 -2 3 9999.99 227.069 3
 2 2 -3 9859.52 227.685 3
 -2 2 3 9969.34 226.634 3
 -2 2 3 9985.32 227.092 3
 2 2 -3 9930.58 227.706 2
 2 2 -3 9977.05 227.142 3
 -2 2 3 9914.8 228.057 1
 -1 -2 3 290.415 10.2526 3
 1 -2 -3 287.396 10.7182 3
 1 -2 -3 279.864 10.0165 3
 -1 -2 3 278.502 10.8556 3
 1 -2 -3 267.652 10.2247 1
 -1 -2 3 315.402 9.86861 2
 -1 2 3 294.098 10.7635 3
 -1 2 3 349.687 12.2366 3
 1 2 -3 292.26 9.81595 2
 1 2 -3 277.162 11.0728 3
 0 -2 3 466.836 14.3275 3
 0 -2 3 440.953 12.8948 2
 0 -2 -3 446.184 15.4078 3
 0 -2 3 462.193 13.6728 3
 0 -2 -3 445.846 13.8989 3
 0 2 -3 440.256 12.9838 2
 0 2 -3 466.974 14.4222 3
 0 2 3 436.654 13.9161 3
 0 2 -3 466.128 13.6321 3
 0 2 -3 438.085 11.7157 1
 0 2 3 491.594 15.586 3
 1 -2 3 1.74866 3.41832 2
 -1 -2 -3 5.04975 5.17458 3
 1 -2 3 -0.5906 3.96092 3
 1 -2 3 -3.4154 4.52864 3
 -1 -2 -3 0.79695 4.05493 3
 -1 2 -3 4.22881 4.63796 3
 -1 2 -3 3.37175 3.02823 1
 -1 2 -3 -1.5864 3.96596 3
 1 2 3 3.3485 3.9331 3
 1 2 3 1.41776 5.22762 3
 -2 -2 -3 137.126 10.3522 3
 2 -2 3 106.233 7.89215 3
 2 -2 3 125.894 9.15161 3
 -2 -2 -3 109.001 8.24028 3
 2 2 3 101.231 8.1726 3
 2 2 3 138.731 10.5466 3
 -2 2 -3 139.28 9.31301 3
 -2 2 -3 108.04 7.93536 3
 3 -2 3 -1.3259 4.39494 3
 -3 -2 -3 2.34522 5.61655 3
 -3 -2 -3 -0.2718 4.47391 3
 3 -2 3 2.64796 4.8396 3
 3 2 3 5.04119 5.89437 3
 3 2 3 2.88126 4.12955 3
 -3 2 -3 6.00675 5.17985 3
 -3 2 -3 1.17791 4.35154 3
 -4 -2 -3 36.2743 5.59964 3
 4 -2 3 37.5729 5.6481 3
 4 -2 3 40.1102 6.39077 3
 -4 -2 -3 29.4618 6.81861 3
 4 2 3 33.9108 6.5892 3
 4 2 3 38.9434 5.76428 3
 -4 2 -3 36.8073 5.60448 3
 -4 2 -3 34.6277 6.29178 3
 -5 -2 -3 941.44 26.2305 3
 5 -2 3 935.905 27.1899 3
 -5 -2 -3 919.724 27.9652 3
 5 -2 3 907.259 25.9384 3
 -5 2 -3 930.467 27.1045 3
 5 2 3 902.402 26.1681 3
 5 2 3 951.308 28.0297 3
 -5 2 -3 938.228 25.9013 3
 6 -2 3 121.587 10.2836 3
 -6 -2 -3 107.768 12.6046 3
 -6 -2 -3 128.897 10.2563 3
 6 -2 3 126.525 11.8908 3
 -6 2 -3 101.722 11.6426 3
 -6 2 -3 119.612 10.0596 3
 6 2 3 118.945 10.3533 3
 6 2 3 130.281 13.0789 3
 -7 -2 -3 685.621 24.7189 3
 7 -2 3 754.513 24.5198 3
 -7 -2 -3 718.218 22.7396 3
 7 -2 3 701.386 22.63 3
 7 2 3 708.241 23.0167 3
 7 2 3 748.663 24.7934 3
 -7 2 -3 708.051 22.4487 3
 -7 2 -3 705.05 24.2207 3
 -7 2 -3 715.466 22.6551 1
 -8 -2 -3 115.848 14.3476 3
 8 -2 3 97.8791 11.5479 3
 8 -2 3 87.9087 10.4711 3
 -8 -2 -3 95.7211 11.617 3
 8 2 3 107.088 14.5572 3
 8 2 3 102.258 11.9254 3
 -8 2 -3 127.471 13.4897 3
 -8 2 -3 84.632 11.2378 1
 -8 2 -3 104.461 11.0796 3
 9 -2 3 153.824 15.8258 3
 -9 -2 -3 149.944 13.5247 3
 -9 -2 -3 148.102 16.7206 3
 9 -2 3 146.245 13.6913 3
 -9 2 -3 139.309 13.0691 1
 9 2 3 161.933 16.7614 3
 -9 2 -3 160.436 15.3649 3
 9 2 3 151.647 13.9539 3
 -9 2 -3 157.927 13.1158 3
 -10 -2 -3 188.919 15.9602 3
 10 -2 3 166.393 15.498 3
 -10 -2 -3 195.836 18.4001 3
 10 -2 3 193.687 18.4901 3
 -10 2 -3 193.316 14.9607 3
 10 2 3 174.605 15.5246 3
 -10 2 -3 170.837 14.9514 1
 -10 2 -3 179.411 18.093 3
 10 2 3 192.424 18.2401 3
 11 -2 3 52.1725 11.7109 3
 -11 -2 -3 45.7838 12.115 3
 -11 -2 -3 48.5387 10.6062 3
 11 -2 3 38.9207 11.5527 3
 -11 2 -3 48.3567 12.0905 3
 11 2 3 50.8275 11.9417 3
 -11 2 -3 35.3543 9.34803 3
 11 2 3 46.202 9.94835 3
 -11 2 -3 58.4109 10.3907 1
 -12 -2 -3 13.0436 10.1438 3
 12 -2 3 19.6414 9.68144 3
 12 -2 3 10.922 11.6965 3
 -12 -2 -3 26.4707 12.5344 3
 12 2 3 10.8822 12.0953 3
 12 2 3 15.2989 9.47483 3
 -12 2 -3 18.9733 9.60565 1
 -12 2 -3 1.85874 8.89708 3
 -12 2 -3 19.7409 11.5461 3
 13 -2 3 64.8035 14.4124 3
 13 -2 3 34.6731 11.1357 3
 -13 -2 -3 37.0068 13.449 3
 -13 -2 -3 52.0752 12.3627 3
 13 2 3 25.9808 10.8316 3
 -13 2 -3 43.4558 11.0828 1
 13 2 3 9.24797 12.3235 3
 -13 2 -3 14.3536 13.0714 3
 -13 2 -3 31.3821 10.8683 3
 14 -2 3 52.0365 15.3278 3
 -14 -2 -3 40.7275 11.617 3
 -14 -2 -3 54.756 14.7198 3
 14 -2 3 38.111 11.9401 3
 -14 2 -3 65.4057 13.0945 1
 14 2 3 43.1975 11.8543 3
 14 2 3 16.4115 15.1445 3
 -14 2 -3 73.4931 15.0759 3
 -14 2 -3 53.1025 12.4532 3
 15 -2 3 57.5789 16.202 3
 -15 -2 -3 -30.153 14.5735 3
 15 -2 3 5.14009 11.0884 3
 -15 -2 -3 16.7972 12.4615 3
 15 2 3 -1.6058 11.4175 3
 15 2 3 -17.72 14.2582 3
 -15 2 -3 26.7961 12.2434 1
 -15 2 -3 -17.666 11.5734 3
 -15 2 -3 -4.9104 13.7924 3
 16 -2 3 -9.483 14.7557 3
 -16 -2 -3 -6.0566 12.1671 1
 -16 -2 -3 6.33463 14.3637 3
 16 -2 3 50.2318 17.5308 3
 -16 -2 -3 -19.642 18.2231 3
 -16 2 -3 3.21035 13.7638 1
 16 2 3 19.0498 13.8009 3
 -16 2 -3 7.62157 14.9727 3
 16 2 3 24.9983 16.9287 3
 -16 2 -3 20.8312 18.3237 3
 -16 -3 3 0.71917 14.3988 3
 -16 -3 3 41.8773 16.6881 3
 16 -3 -3 21.5955 13.7087 3
 16 -3 -3 58.9199 16.6998 3
 -16 -3 3 28.8089 11.4388 1
 -16 3 3 15.1558 14.4699 1
 16 3 -3 27.1473 13.2131 3
 16 3 -3 16.9832 17.3585 3
 -16 3 3 13.7579 16.7458 3
 -16 3 3 2.15945 14.7508 3
 15 -3 -3 -15.779 13.7026 3
 -15 -3 3 -0.0293 12.2403 3
 -15 -3 3 42.2782 15.1861 3
 -15 -3 3 -4.168 9.813 1
 15 -3 -3 23.0768 11.0949 3
 15 3 -3 16.3868 15.8536 3
 -15 3 3 -2.128 11.9136 1
 -15 3 3 7.32023 11.5947 3
 15 3 -3 4.82252 11.1057 3
 -15 3 3 -15.658 13.3616 3
 14 -3 -3 58.8277 11.9868 3
 -14 -3 3 92.9514 15.6089 3
 -14 -3 3 76.4746 11.4161 1
 14 -3 -3 48.2862 13.572 3
 -14 -3 3 67.2757 12.5929 3
 14 3 -3 60.162 15.1227 3
 -14 3 3 40.885 13.7523 3
 -14 3 3 52.3445 11.0899 3
 14 3 -3 64.7685 11.6025 3
 -14 3 3 65.6526 12.3408 1
 -13 -3 3 40.7448 11.3725 3
 13 -3 -3 31.3938 11.6483 3
 -13 -3 3 72.573 9.82312 1
 -13 -3 3 75.9611 14.1215 3
 13 -3 -3 55.383 11.2856 3
 -13 3 3 45.3775 10.036 3
 13 3 -3 44.3444 13.3497 3
 -13 3 3 35.0878 13.0911 3
 -13 3 3 53.8495 11.2619 1
 13 3 -3 30.2379 10.0161 3
 12 -3 -3 252.016 19.1682 3
 -12 -3 3 265.321 17.7273 3
 -12 -3 3 262.101 14.7978 1
 12 -3 -3 234.427 17.9213 3
 -12 -3 3 268.414 21.5842 3
 -12 3 3 258.938 18.2205 1
 -12 3 3 227.774 19.8278 3
 -12 3 3 245.532 16.6884 3
 12 3 -3 249.292 17.1331 3
 12 3 -3 287.165 21.3114 3
 -11 -3 3 29.7269 7.05316 1
 11 -3 -3 23.4211 8.45008 3
 -11 -3 3 15.2719 10.4576 3
 11 -3 -3 19.5258 9.27319 3
 -11 -3 3 18.7038 8.13337 3
 -11 3 3 24.8503 9.64889 3
 11 3 -3 21.3284 8.09745 3
 -11 3 3 3.46388 7.22841 3
 -11 3 3 21.1599 8.64108 1
 11 3 -3 15.0278 10.3662 3
 10 -3 -3 142.417 14.3552 3
 10 -3 -3 121.851 13.2176 3
 -10 -3 3 131.547 14.6297 3
 -10 -3 3 128.599 13.2569 3
 -10 -3 3 114.866 10.7168 1
 -10 3 3 124.392 15.2684 3
 10 3 -3 122.949 13.0343 3
 -10 3 3 111.126 17.1896 1
 10 3 -3 124.071 16.5209 3
 -10 3 3 141.709 11.6964 3
 -9 -3 3 -1.4259 6.14924 3
 9 -3 -3 8.22442 7.20825 3
 -9 -3 3 10.6976 8.48194 3
 -9 -3 3 -0.4614 5.08164 1
 9 -3 -3 11.8726 6.55616 3
 -9 3 3 0.33799 7.01715 1
 -9 3 3 4.21763 7.60985 3
 9 3 -3 16.01 8.98788 3
 -9 3 3 11.0829 6.03435 3
 9 3 -3 -1.0442 6.31747 3
 -8 -3 3 3.23488 5.55824 3
 -8 -3 3 -0.57 4.47577 1
 8 -3 -3 0.81501 6.48197 3
 -8 -3 3 -0.1424 7.42072 3
 8 -3 -3 1.00851 5.8116 3
 -8 3 3 -2.1638 5.26257 3
 8 3 -3 -5.9526 7.47213 3
 -8 3 3 5.48855 6.88014 3
 8 3 -3 3.50695 5.71319 3
 -8 3 3 -7.8823 6.13713 1
 -7 -3 3 132.51 10.5915 3
 -7 -3 3 143.198 13.7275 3
 7 -3 -3 129.029 10.2271 3
 7 -3 -3 123.496 11.189 3
 -7 3 3 133.545 9.96171 3
 -7 3 3 131.765 11.6438 1
 -7 3 3 143.866 11.6899 3
 7 3 -3 146.482 13.3092 3
 7 3 -3 122.134 11.0657 3
 -6 -3 3 0.90045 4.89262 3
 6 -3 -3 3.51999 5.11734 3
 -6 -3 3 2.83754 6.66558 3
 6 -3 -3 1.68214 5.8222 1
 6 -3 -3 10.9035 5.72854 3
 6 3 -3 7.70424 6.77317 3
 6 3 -3 12.0955 5.42081 3
 -6 3 3 6.51345 5.73421 1
 -6 3 3 -0.3442 4.62647 3
 -6 3 3 2.98126 5.84508 3
 5 -3 -3 62.9517 8.62711 3
 -5 -3 3 90.2479 12.2547 3
 -5 -3 3 71.5553 9.12202 3
 5 -3 -3 37.7675 6.83462 1
 -5 3 3 50.2356 6.10491 3
 5 3 -3 69.0406 9.4295 3
 -5 3 3 52.8257 7.06345 1
 -4 -3 3 62.1821 6.32897 3
 -4 -3 3 62.1827 7.96822 3
 4 -3 -3 49.3884 5.82278 3
 4 -3 -3 58.7253 6.63909 3
 4 -3 -3 49.6268 6.37838 1
 4 3 -3 66.6511 9.10876 3
 -4 3 3 54.4346 6.76694 3
 -4 3 3 59.793 6.5728 1
 -4 3 3 58.5701 7.51732 3
 4 3 -3 60.7734 8.04996 3
 -3 -3 3 220.461 13.6309 3
 3 -3 -3 230.748 10.4117 3
 3 -3 -3 217.396 11.3216 3
 -3 -3 3 240.461 11.4375 3
 3 -3 -3 227.096 10.6229 1
 3 3 -3 229.171 11.4463 3
 -3 3 3 245.354 10.3288 3
 3 3 -3 243.786 13.6489 3
 -3 3 3 249.929 11.8012 3
 -3 3 3 226.236 10.5495 1
 2 -3 -3 190.437 10.316 3
 -2 -3 3 190.433 9.63303 3
 2 -3 -3 162.607 9.35026 1
 2 -3 -3 168.213 9.37031 3
 -2 -3 3 204.092 10.4684 3
 2 3 -3 172.746 8.56185 2
 -2 3 3 168.619 9.00593 1
 2 3 -3 216.868 12.7995 3
 -2 3 3 205.031 11.9624 3
 2 3 -3 191.247 10.4337 3
 -2 3 3 191.593 10.4827 3
 1 -3 -3 239.409 10.0806 1
 -1 -3 3 264.039 11.5426 3
 -1 -3 3 247.006 10.734 3
 1 -3 -3 250.609 10.4735 3
 1 -3 -3 263.733 11.391 3
 1 3 -3 281.116 13.3724 3
 -1 3 3 247.986 11.4035 3
 1 3 -3 244.167 11.6284 3
 1 3 -3 238.819 9.35399 2
 -1 3 3 266.006 13.1616 3
 0 -3 3 3.08056 4.95474 3
 0 -3 3 6.42621 4.58912 3
 0 -3 -3 9.24846 4.64052 3
 0 -3 3 7.49506 3.70928 2
 0 -3 -3 0.94995 3.81562 1
 0 3 -3 5.85029 2.757 1
 0 3 -3 8.12356 4.59727 3
 0 3 -3 2.05191 5.0277 3
 0 3 3 2.68973 4.68016 3
 0 3 -3 7.05146 3.95831 2
 0 3 3 4.57463 6.01473 3
 1 -3 3 57.6369 6.68654 3
 -1 -3 -3 51.5515 6.1019 3
 1 -3 3 51.7314 5.78581 3
 1 -3 3 45.4161 4.74505 2
 -1 -3 -3 41.4796 7.34953 3
 1 3 3 46.8612 7.49721 3
 -1 3 -3 52.4039 5.65233 1
 -1 3 -3 45.8694 6.3803 3
 -1 3 -3 45.1363 5.35034 3
 1 3 3 45.7959 6.16317 3
 2 -3 3 1929.93 48.3262 3
 -2 -3 -3 1945.94 50.1645 3
 2 -3 3 1971.82 49.1055 3
 -2 -3 -3 1999.17 48.8265 3
 2 -3 3 1949.85 46.9669 2
 -2 3 -3 1972.16 48.3492 3
 -2 3 -3 1920.88 49.0602 3
 -2 3 -3 1944.92 47.2453 1
 2 3 3 1917.77 48.7462 3
 2 3 3 2005.35 50.1042 3
 -3 -3 -3 328.776 13.7504 3
 3 -3 3 339.932 13.3778 3
 -3 -3 -3 354.657 16.0109 3
 3 -3 3 329.253 11.7032 2
 3 -3 3 344.391 14.3514 3
 3 3 3 326.353 13.8343 3
 -3 3 -3 344.132 12.353 1
 -3 3 -3 347.679 13.357 3
 3 3 3 352.11 16.1963 3
 -3 3 -3 316.857 14.57 3
 -4 -3 -3 483.37 19.2207 3
 4 -3 3 481.474 16.7252 3
 4 -3 3 487.731 17.855 3
 -4 -3 -3 477.539 17.0247 3
 -4 3 -3 492.656 16.6539 3
 -4 3 -3 477.17 17.8302 3
 -4 3 -3 475.273 16.0424 1
 4 3 3 513.482 19.1942 3
 4 3 3 462.606 17.117 3
 5 -3 3 181.725 12.4757 3
 -5 -3 -3 185.109 14.1865 3
 -5 -3 -3 160.03 11.2685 3
 5 -3 3 175.787 11.3191 3
 5 3 3 168.942 11.6707 3
 -5 3 -3 164.643 11.0673 3
 -5 3 -3 169.844 10.7441 1
 5 3 3 195.137 14.1112 3
 -5 3 -3 186.798 13.1093 3
 6 -3 3 88.8439 11.8165 3
 -6 -3 -3 64.8247 9.46187 3
 6 -3 3 52.3008 7.17376 3
 -6 -3 -3 51.4566 7.24635 3
 -6 3 -3 91.3693 11.7147 3
 -6 3 -3 55.4851 7.21137 3
 6 3 3 47.7757 7.51958 3
 6 3 3 45.5192 8.66959 3
 -6 3 -3 39.3911 6.90216 1
 7 -3 3 99.273 12.9996 3
 7 -3 3 92.7066 11.4032 3
 -7 -3 -3 87.2975 11.0988 3
 -7 -3 -3 73.8377 10.2671 3
 -7 3 -3 98.5231 12.9386 3
 7 3 3 104.147 11.6198 3
 7 3 3 98.1146 11.4458 3
 -7 3 -3 80.6643 11.1656 3
 -7 3 -3 83.4439 10.8656 1
 -8 -3 -3 69.6091 10.8184 3
 -8 -3 -3 65.4278 8.74462 3
 8 -3 3 76.6892 10.1 3
 8 -3 3 61.3246 8.3034 3
 -8 3 -3 107.809 14.8369 3
 -8 3 -3 65.1619 8.57156 3
 8 3 3 55.3075 8.56334 3
 -8 3 -3 58.118 8.40152 1
 8 3 3 78.9009 11.2217 3
 9 -3 3 22.8889 8.027 3
 9 -3 3 25.3324 9.22928 3
 -9 -3 -3 17.751 9.87459 3
 -9 -3 -3 27.7252 8.36018 3
 9 3 3 22.4413 8.70626 3
 -9 3 -3 17.4299 7.68388 1
 9 3 3 22.1321 10.1487 3
 -9 3 -3 20.7209 9.33761 3
 -9 3 -3 24.6293 7.82342 3
 10 -3 3 0.40938 8.36385 3
 -10 -3 -3 4.58593 10.6833 3
 -10 -3 -3 3.74249 8.84243 3
 10 -3 3 1.32992 9.18915 3
 -10 3 -3 -6.773 9.69223 3
 -10 3 -3 10.4587 8.3309 1
 -10 3 -3 1.74923 9.72272 3
 10 3 3 0.9725 8.17535 3
 10 3 3 7.97648 10.1883 3
 11 -3 3 248.496 21.1271 3
 -11 -3 -3 217.134 21.7074 3
 -11 -3 -3 201.533 17.4219 3
 11 -3 3 196.511 17.6247 3
 -11 3 -3 209.636 17.8436 1
 -11 3 -3 206.036 17.0999 3
 -11 3 -3 211.312 20.0453 3
 11 3 3 222.581 21.2592 3
 11 3 3 199.65 17.9417 3
 -12 -3 -3 61.2531 14.1192 3
 12 -3 3 55.1373 11.9741 3
 -12 -3 -3 53.6738 11.7736 3
 12 -3 3 62.0569 13.6892 3
 12 3 3 43.3573 13.0698 3
 -12 3 -3 61.9969 13.9587 3
 12 3 3 39.0356 11.0738 3
 -12 3 -3 54.4268 11.5406 3
 -12 3 -3 71.0581 11.7262 1
 13 -3 3 52.2544 13.6356 3
 -13 -3 -3 51.8138 16.1313 3
 13 -3 3 76.286 13.1533 3
 -13 -3 -3 65.8809 12.6375 3
 -13 3 -3 42.9775 12.3061 3
 13 3 3 73.2339 15.4627 3
 -13 3 -3 65.6324 12.3594 1
 13 3 3 70.0951 13.4371 3
 -13 3 -3 61.4245 15.4572 3
 -14 -3 -3 -26.438 15.0435 3
 14 -3 3 6.33414 11.5358 3
 -14 -3 -3 12.1816 12.0662 3
 14 -3 3 -3.2187 14.5433 3
 -14 3 -3 12.3791 11.5199 1
 14 3 3 25.1267 12.5564 3
 -14 3 -3 -13.511 11.0498 3
 -14 3 -3 -1.3717 14.748 3
 14 3 3 4.37999 14.4413 3
 15 -3 3 33.3014 13.3795 3
 -15 -3 -3 29.3773 14.1474 3
 -15 -3 -3 2.83095 17.2483 3
 15 -3 3 26.7407 16.5068 3
 15 3 3 43.3369 14.9788 3
 15 3 3 6.66872 16.4069 3
 -15 3 -3 8.47663 16.8784 3
 -15 3 -3 42.3976 13.1294 1
 -15 -4 3 -17.565 14.1314 3
 -15 -4 3 17.2022 16.9737 3
 15 -4 -3 -16.21 14.4359 3
 -15 -4 3 20.8837 10.3252 1
 15 -4 -3 20.6182 14.1743 3
 15 4 -3 22.6187 13.3821 3
 -15 4 3 -4.8995 11.902 3
 15 4 -3 -27.427 16.5322 3
 -15 4 3 29.1724 14.5675 1
 -15 4 3 2.15544 16.1731 3
 14 -4 -3 4.33325 12.2019 3
 -14 -4 3 1.27464 13.9273 3
 14 -4 -3 5.65073 13.2972 3
 -14 -4 3 14.049 9.91546 1
 -14 -4 3 1.29597 11.0205 3
 14 4 -3 8.86181 11.1666 3
 -14 4 3 40.2648 12.7357 1
 -14 4 3 6.53024 13.6193 3
 -14 4 3 -2.8869 10.5908 3
 14 4 -3 22.2044 15.7334 3
 -13 -4 3 126.824 13.9355 1
 13 -4 -3 111.817 12.9654 3
 13 -4 -3 108.791 14.8047 3
 -13 -4 3 110.322 14.168 3
 -13 -4 3 75.9603 16.0403 3
 13 4 -3 98.217 13.4243 3
 -13 4 3 96.7794 14.0258 1
 -13 4 3 105.414 12.4597 3
 -13 4 3 136.035 15.4953 3
 13 4 -3 105.962 16.1421 3
 -12 -4 3 79.7727 15.2229 3
 12 -4 -3 68.1993 11.7622 3
 12 -4 -3 80.7439 12.2497 3
 -12 -4 3 78.3518 9.046 1
 -12 -4 3 80.522 11.3891 3
 -12 4 3 75.2261 11.1959 3
 -12 4 3 73.3998 13.3322 3
 -12 4 3 76.6772 12.7692 1
 12 4 -3 86.8696 14.1168 3
 12 4 -3 76.2253 11.8026 3
 -11 -4 3 147.337 15.6936 3
 11 -4 -3 153.702 17.2618 3
 -11 -4 3 132.381 16.2559 3
 11 -4 -3 160.926 16.1793 3
 -11 -4 3 148.928 12.1885 1
 -11 4 3 146.199 15.1622 3
 11 4 -3 157.653 15.6527 3
 11 4 -3 173.882 20.6841 3
 -11 4 3 157.338 18.0686 3
 -11 4 3 153.65 17.4075 1
 -10 -4 3 188.148 18.9771 3
 10 -4 -3 205.457 17.1607 3
 -10 -4 3 173.373 15.1145 3
 -10 -4 3 211.78 12.0935 1
 10 -4 -3 202.255 15.6288 3
 10 4 -3 207.892 18.7447 3
 -10 4 3 230.005 18.0632 3
 -10 4 3 216.856 15.1731 3
 10 4 -3 240.443 16.7862 3
 -10 4 3 235.367 17.3751 1
 -9 -4 3 313.253 20.2185 3
 -9 -4 3 288.772 16.6735 3
 -9 -4 3 288.518 12.7054 1
 9 -4 -3 303.23 17.4871 3
 9 -4 -3 284.583 22.1382 3
 9 4 -3 312.42 16.8874 3
 -9 4 3 317.317 15.8079 3
 -9 4 3 301.59 18.2074 3
 9 4 -3 302.471 20.5498 3
 -9 4 3 320.854 21.2132 1
 8 -4 -3 11.3672 7.92963 3
 -8 -4 3 10.4543 6.84189 3
 -8 -4 3 10.6531 8.74244 3
 8 -4 -3 7.42122 6.77222 3
 -8 4 3 17.1297 7.77118 3
 -8 4 3 0.59381 6.36315 3
 8 4 -3 11.37 7.32044 3
 8 4 -3 13.8862 9.58393 3
 -8 4 3 11.9638 7.61563 1
 7 -4 -3 191.2 13.5887 1
 -7 -4 3 212.317 13.1063 3
 7 -4 -3 187.014 12.8561 3
 -7 -4 3 222.332 16.9513 3
 7 -4 -3 217.85 13.9878 3
 7 4 -3 194.325 13.8475 3
 7 4 -3 206.574 16.5694 3
 -7 4 3 217.089 12.8258 3
 -7 4 3 188.653 13.5612 1
 -7 4 3 188.3 13.5534 3
 6 -4 -3 2.72237 6.38718 3
 -6 -4 3 6.70027 7.71908 3
 6 -4 -3 1.96888 5.88058 3
 -6 -4 3 6.60984 5.91958 3
 6 -4 -3 8.50509 6.61702 1
 -6 4 3 5.99328 6.35461 1
 -6 4 3 7.75239 6.85187 3
 -6 4 3 3.87433 5.65769 3
 6 4 -3 4.42691 8.272 3
 6 4 -3 -0.9048 6.29723 3
 -5 -4 3 224.294 15.9888 3
 -5 -4 3 256.251 13.0144 3
 5 -4 -3 231.377 12.4275 3
 5 -4 -3 254.624 13.1705 1
 5 -4 -3 262.686 13.7288 3
 -5 4 3 253.879 13.0229 1
 5 4 -3 257.473 16.3155 3
 5 4 -3 259.582 13.6732 3
 -5 4 3 254.163 13.8477 3
 -5 4 3 256.958 12.5013 3
 4 -4 -3 8.56685 6.02508 3
 4 -4 -3 2.96274 5.62358 1
 4 -4 -3 7.34938 5.83736 3
 -4 -4 3 12.2257 5.86051 3
 -4 -4 3 11.1658 7.72966 3
 4 4 -3 -0.7622 7.38285 3
 4 4 -3 11.7505 6.04694 3
 -4 4 3 7.54688 5.25316 3
 -4 4 3 3.19173 5.51213 1
 -4 4 3 1.63524 5.89881 3
 -3 -4 3 1061.58 29.8324 3
 3 -4 -3 1057.36 29.6768 3
 3 -4 -3 1105 30.7412 3
 3 -4 -3 1081.04 29.5155 1
 -3 -4 3 1134.85 30.6504 3
 -3 4 3 1090.39 30.876 3
 3 4 -3 1086.99 30.6538 3
 3 4 -3 1145.4 32.7612 3
 -3 4 3 1088.04 29.3899 1
 3 4 -3 1061.3 28.5481 2
 2 -4 -3 100.83 10.5029 3
 2 -4 -3 95.8388 8.83473 1
 -2 -4 3 101.24 10.5589 3
 -2 -4 3 96.2809 9.44625 3
 2 -4 -3 92.5508 9.18232 3
 -2 4 3 100.68 10.5832 3
 2 4 -3 92.1632 7.69569 2
 2 4 -3 116.103 13.4161 3
 2 4 -3 109.817 11.0437 3
 -2 4 3 95.9891 12.4733 3
 1 -4 -3 557.263 17.089 1
 -1 -4 3 551.309 18.2026 3
 -1 -4 3 581.526 19.1456 3
 1 -4 -3 537.455 17.9075 3
 1 -4 -3 549.086 18.7927 3
 -1 4 3 545.647 18.9433 3
 -1 4 3 567.113 20.7511 3
 1 4 -3 605.403 21.3166 3
 1 4 -3 528.22 16.143 2
 1 4 -3 549.612 19.1239 3
 0 -4 -3 256.596 13.0698 3
 0 -4 3 243.947 9.82833 2
 0 -4 3 246.339 11.9674 3
 0 -4 3 253.687 13.167 3
 0 -4 -3 243.199 11.8396 3
 0 -4 -3 230.895 10.2241 1
 0 4 -3 246.647 9.92799 2
 0 4 3 259.445 12.8716 3
 0 4 -3 243.212 13.2659 3
 0 4 -3 239.655 8.38391 1
 0 4 3 306.368 15.3107 3
 1 -4 3 1278.52 31.6011 2
 -1 -4 -3 1209.29 31.8862 1
 1 -4 3 1242.47 33.6936 3
 1 -4 3 1260.57 34.5338 3
 -1 -4 -3 1266.03 34.3546 3
 -1 -4 -3 1233.58 36.0994 3
 -1 4 -3 1263.7 31.3496 1
 -1 4 -3 1324.36 33.9068 3
 1 4 3 1273.94 34.466 3
 -1 4 -3 1242.47 34.7068 3
 1 4 3 1292.36 35.8812 3
 2 -4 3 32.5571 6.8446 3
 -2 -4 -3 34.1185 6.62713 3
 2 -4 3 40.7369 5.18071 2
 2 -4 3 35.4801 6.41726 3
 -2 -4 -3 47.6658 9.08307 3
 2 4 3 38.1887 8.14885 3
 -2 4 -3 30.1792 7.2274 3
 -2 4 -3 45.6591 6.70823 1
 -2 4 -3 38.5849 6.44399 3
 2 4 3 56.012 7.32885 3
 -3 -4 -3 1127.7 31.2781 3
 3 -4 3 1082.92 30.6548 3
 -3 -4 -3 1044.96 33.045 3
 3 -4 3 1122.75 31.7753 3
 3 -4 3 1148.89 28.6421 2
 3 4 3 1119.79 33.1862 3
 -3 4 -3 1126.06 29.3916 1
 -3 4 -3 1130.05 30.7641 3
 3 4 3 1080.12 31.384 3
 -3 4 -3 1074.82 31.8979 3
 4 -4 3 198.984 13.3388 3
 4 -4 3 201.239 9.90042 2
 -4 -4 -3 212.757 15.6175 3
 -4 -4 -3 206.298 12.8587 3
 4 -4 3 205.377 12.3097 3
 -4 4 -3 203.33 10.8959 1
 4 4 3 211.914 15.7392 3
 4 4 3 201.945 13.1738 3
 -4 4 -3 181.04 13.6606 3
 -4 4 -3 206.472 12.1257 3
 -5 -4 -3 349.981 18.6871 3
 5 -4 3 360.427 17.1406 3
 -5 -4 -3 360.107 16.292 3
 5 -4 3 367.221 15.7936 3
 5 4 3 370.569 18.7237 3
 -5 4 -3 352.133 15.6495 3
 5 4 3 354.789 16.2073 3
 -5 4 -3 368.119 14.8681 1
 -5 4 -3 332.619 16.7799 3
 6 -4 3 243.575 14.151 3
 6 -4 3 224.257 15.286 3
 -6 -4 -3 234.84 14.4885 3
 -6 -4 -3 244.14 17.804 3
 -6 4 -3 237.28 14.3025 3
 6 4 3 227.047 16.7235 3
 -6 4 -3 234.134 15.7389 3
 6 4 3 245.705 14.9266 3
 -6 4 -3 233.811 13.1933 1
 7 -4 3 11.8668 8.62442 3
 -7 -4 -3 15.5664 7.3316 3
 -7 -4 -3 3.02391 9.48172 3
 7 -4 3 1.26982 7.24694 3
 -7 4 -3 9.77068 8.62539 3
 -7 4 -3 9.03358 6.89553 3
 7 4 3 11.802 7.64389 3
 -7 4 -3 19.4569 7.50663 1
 7 4 3 9.49895 10.16 3
 -8 -4 -3 50.754 11.0848 3
 -8 -4 -3 58.1459 9.408 3
 8 -4 3 51.9207 8.96321 3
 8 -4 3 62.8129 10.8243 3
 -8 4 -3 64.0312 10.8434 3
 8 4 3 59.2462 9.7125 3
 -8 4 -3 59.9172 9.24191 3
 8 4 3 63.6262 11.9431 3
 -8 4 -3 64.28 9.46935 1
 -9 -4 -3 14.5896 11.2257 3
 9 -4 3 18.2745 8.77918 3
 -9 -4 -3 22.6268 8.93736 3
 9 -4 3 10.1701 9.41354 3
 -9 4 -3 14.7613 10.3299 3
 -9 4 -3 12.5746 14.2812 1
 9 4 3 13.0207 8.84608 3
 -9 4 -3 32.3103 11.8278 3
 9 4 3 36.0363 12.0938 3
 10 -4 3 42.535 10.5358 3
 -10 -4 -3 33.0741 10.0975 3
 -10 -4 -3 29.9704 12.6327 3
 10 -4 3 35.1069 10.9671 3
 -10 4 -3 38.9331 9.90156 3
 -10 4 -3 36.063 10.2879 1
 -10 4 -3 44.4483 12.1988 3
 10 4 3 43.9531 12.091 3
 10 4 3 41.0747 13.2404 3
 -11 -4 -3 38.3699 13.9842 3
 -11 -4 -3 22.8265 9.29247 3
 11 -4 3 5.36042 10.1535 3
 11 -4 3 22.574 11.8395 3
 -11 4 -3 18.5388 10.3042 1
 11 4 3 10.2672 10.2126 3
 -11 4 -3 2.73242 12.1458 3
 -11 4 -3 13.8382 9.55225 3
 11 4 3 31.0494 12.9674 3
 -12 -4 -3 140.614 18.0669 3
 -12 -4 -3 129.976 14.761 3
 12 -4 3 125.976 14.6393 3
 12 -4 3 214.913 22.1819 3
 -12 4 -3 126.556 15.0224 1
 -12 4 -3 148.771 18.7741 3
 12 4 3 159.743 19.6279 3
 -12 4 -3 147.483 17.4296 3
 12 4 3 156.469 18.3488 3
 13 -4 3 30.3794 13.5311 3
 -13 -4 -3 9.23183 12.0267 3
 -13 -4 -3 36.3664 16.8131 3
 13 -4 3 38.9414 14.3029 3
 -13 4 -3 9.08722 12.0821 3
 13 4 3 16.5976 15.4637 3
 -13 4 -3 13.6673 10.9864 1
 -13 4 -3 45.9775 15.5423 3
 13 4 3 16.252 12.4784 3
 -14 -4 -3 67.8886 15.9138 3
 14 -4 3 84.785 15.8625 3
 14 -4 3 111.89 17.5392 3
 -14 -4 -3 96.7059 19.324 3
 -14 4 -3 95.526 14.1921 1
 14 4 3 88.8037 15.8739 3
 -14 4 -3 102.872 19.7969 3
 14 4 3 72.8057 19.9934 3
 -14 4 -3 118.482 15.4645 3
 14 -5 -3 5.62735 14.8435 3
 -14 -5 3 23.8734 19.9861 3
 -14 -5 3 9.02834 8.63084 1
 -14 -5 3 -8.7344 13.2186 3
 14 -5 -3 24.3258 13.815 3
 14 5 -3 11.6931 16.5403 3
 -14 5 3 2.18873 14.2347 1
 -14 5 3 19.2239 13.2041 3
 14 5 -3 30.3895 14.2557 3
 -14 5 3 16.0547 16.0625 3
 -13 -5 3 6.16779 11.1994 3
 -13 -5 3 10.3132 17.0936 3
 -13 -5 3 12.1671 8.61086 1
 13 -5 -3 18.4839 13.6931 3
 13 -5 -3 -3.3359 11.472 3
 -13 5 3 14.7839 14.2373 3
 -13 5 3 -3.2386 11.05 3
 13 5 -3 -0.8057 11.6967 3
 13 5 -3 11.4541 15.8839 3
 -13 5 3 17.0511 12.5519 1
 -12 -5 3 33.3678 15.0965 3
 12 -5 -3 19.5855 12.9338 3
 -12 -5 3 19.6167 7.2898 1
 -12 -5 3 12.4972 10.9439 3
 12 -5 -3 -9.493 10.4681 3
 12 5 -3 28.9934 14.6156 3
 -12 5 3 6.78724 9.66816 3
 -12 5 3 29.8385 12.0357 1
 -12 5 3 -12.456 12.2075 3
 12 5 -3 15.1244 11.2905 3
 11 -5 -3 17.328 11.2158 3
 -11 -5 3 13.8165 9.82493 3
 -11 -5 3 -7.5062 13.2945 3
 11 -5 -3 11.3401 10.4192 3
 -11 -5 3 15.4445 6.61769 1
 -11 5 3 26.696 9.55632 3
 11 5 -3 25.1407 13.5816 3
 -11 5 3 26.1458 11.7882 1
 11 5 -3 9.15932 10.4971 3
 -11 5 3 18.2871 11.9251 3
 -10 -5 3 134.228 15.8614 3
 10 -5 -3 120.897 15.5277 3
 -10 -5 3 121.014 10.3109 1
 -10 -5 3 116.708 16.0254 3
 10 -5 -3 175.498 17.9197 3
 10 5 -3 147.098 16.521 3
 -10 5 3 163.545 19.1318 3
 -10 5 3 147.282 17.5184 1
 -10 5 3 114.915 14.9681 3
 10 5 -3 134.572 16.7285 3
 9 -5 -3 27.1904 9.9498 3
 -9 -5 3 30.6572 9.17707 3
 -9 -5 3 34.3305 13.1597 3
 9 -5 -3 13.5618 9.01747 3
 -9 -5 3 22.9059 5.57014 1
 -9 5 3 56.9415 10.6224 3
 9 5 -3 19.31 11.5251 3
 -9 5 3 13.3627 9.20213 1
 -9 5 3 29.0285 8.69955 3
 9 5 -3 22.042 9.21223 3
 -8 -5 3 18.1263 11.5623 3
 -8 -5 3 4.3536 4.65469 1
 8 -5 -3 10.7365 8.27298 3
 -8 -5 3 10.0896 8.53986 3
 8 -5 -3 12.3748 9.09601 3
 8 5 -3 13.6059 11.1479 3
 8 5 -3 3.76973 11.5877 3
 -8 5 3 16.1781 15.7277 1
 -8 5 3 12.9777 7.54446 3
 -8 5 3 11.9289 9.31416 3
 7 -5 -3 83.5002 9.76166 3
 -7 -5 3 81.5933 11.8942 3
 7 -5 -3 88.8595 10.7425 3
 -7 -5 3 74.7313 12.8232 3
 7 5 -3 90.0014 10.9449 3
 -7 5 3 70.8742 10.2607 3
 7 5 -3 92.3042 12.9203 3
 -7 5 3 85.6914 10.3763 1
 -7 5 3 79.6907 9.68744 3
 6 -5 -3 41.7566 8.8595 1
 -6 -5 3 32.5119 7.87819 3
 -6 -5 3 48.2295 11.2612 3
 6 -5 -3 48.4004 8.45315 3
 6 -5 -3 39.836 9.11582 3
 6 5 -3 35.0221 10.7628 3
 -6 5 3 39.2527 9.17076 3
 6 5 -3 41.0172 9.40625 3
 -6 5 3 36.0989 7.73125 3
 -6 5 3 38.0167 8.254 1
 5 -5 -3 51.8441 8.51548 1
 5 -5 -3 48.3161 8.72747 3
 5 -5 -3 42.6459 7.66123 3
 -5 -5 3 46.4744 8.16787 3
 -5 5 3 52.0569 9.04595 3
 5 5 -3 37.2622 10.3592 3
 -5 5 3 41.8368 7.75266 3
 -5 5 3 46.3118 7.73351 1
 5 5 -3 42.8707 7.13269 2
 5 5 -3 46.7704 8.73476 3
 4 -5 -3 1.34022 6.44631 3
 -4 -5 3 5.78928 6.57603 3
 4 -5 -3 -4.9969 6.82472 3
 4 -5 -3 -1.0774 6.06397 1
 -4 -5 3 8.40188 6.80374 3
 4 5 -3 6.0504 8.99699 3
 4 5 -3 0.96195 6.65984 3
 -4 5 3 -2.2289 7.30127 3
 -4 5 3 7.9662 6.24003 1
 4 5 -3 6.44195 5.61429 2
 3 -5 -3 0.99347 6.2835 3
 3 -5 -3 1.15167 5.88592 1
 -3 -5 3 10.2817 6.76372 3
 3 -5 -3 -6.4606 6.81182 3
 -3 -5 3 1.88265 6.5962 3
 -3 5 3 13.8551 7.08998 3
 -3 5 3 11.9459 9.05337 3
 3 5 -3 -3.3012 8.55611 3
 3 5 -3 6.01465 7.08652 3
 3 5 -3 0.20592 5.02601 2
 -2 -5 3 19.1198 7.19057 3
 -2 -5 3 3.99414 6.43841 3
 2 -5 -3 30.6773 6.91422 3
 2 -5 -3 21.9745 7.13099 3
 2 -5 -3 14.4098 5.98362 1
 2 5 -3 4.54993 6.62133 3
 -2 5 3 11.777 7.29668 3
 2 5 -3 15.0699 5.12021 2
 2 5 -3 17.1912 8.8528 3
 -2 5 3 26.4401 8.49157 3
 1 -5 -3 15.0545 6.42326 3
 1 -5 -3 6.45504 6.7303 3
 -1 -5 3 5.42877 6.26615 3
 1 -5 -3 10.7533 5.54891 1
 -1 -5 3 10.4761 7.25679 3
 -1 5 3 12.5693 7.17627 3
 1 5 -3 13.9668 6.90115 3
 -1 5 3 20.8455 8.43256 3
 1 5 -3 19.3417 8.9873 3
 1 5 -3 21.8034 5.24208 2
 0 -5 3 171.521 13.3753 3
 0 -5 -3 152.347 9.86577 1
 0 -5 3 168.221 12.2957 3
 0 -5 -3 169.23 11.9288 3
 0 -5 -3 182.252 12.8613 3
 0 5 3 172.803 13.055 3
 0 5 -3 157.844 13.7342 3
 0 5 3 171.374 15.3319 3
 0 5 -3 153.146 9.54321 2
 0 5 -3 171.748 15.9614 3
 -1 -5 -3 5.70829 6.71048 3
 1 -5 3 10.228 4.67118 2
 -1 -5 -3 4.32479 4.78958 1
 1 -5 3 6.16607 7.00242 3
 1 -5 3 -2.3151 7.14483 3
 -1 -5 -3 4.95743 6.37317 3
 -1 5 -3 5.91343 4.14828 1
 -1 5 -3 15.1643 7.11596 3
 1 5 3 28.3979 8.95848 3
 1 5 3 10.2529 7.2165 3
 2 -5 3 89.0217 7.80829 2
 2 -5 3 55.6535 8.05214 3
 -2 -5 -3 82.624 8.97191 3
 2 -5 3 75.0971 9.1676 3
 -2 -5 -3 66.6318 7.78165 1
 -2 5 -3 67.9913 9.4484 3
 2 5 3 72.633 9.23856 3
 2 5 3 90.4806 11.1704 3
 -2 5 -3 81.5102 8.57332 3
 -2 5 -3 71.0436 7.76146 1
 2 5 3 65.1828 6.50128 2
 3 -5 3 -0.1128 6.15996 3
 -3 -5 -3 0.30346 6.43143 3
 3 -5 3 5.81758 7.29556 3
 -3 -5 -3 -9.8626 9.09846 3
 3 -5 3 0.98114 4.59496 2
 3 5 3 7.68727 7.24621 3
 -3 5 -3 -6.4962 4.85913 1
 3 5 3 4.25938 8.84267 3
 -3 5 -3 -1.8745 7.57314 3
 -3 5 -3 -7.3104 6.31777 3
 -4 -5 -3 2.78173 6.91668 3
 4 -5 3 -1.7386 5.10467 2
 4 -5 3 -0.0932 7.17198 3
 -4 -5 -3 6.4899 8.90654 3
 4 -5 3 2.52355 6.81132 3
 -4 5 -3 -4.0321 5.49392 1
 4 5 3 1.61186 8.93396 3
 4 5 3 -6.3802 7.11516 3
 -4 5 -3 -1.289 6.66803 3
 -4 5 -3 2.12357 8.33922 3
 5 -5 3 22.7158 7.66235 3
 -5 -5 -3 28.9622 8.15224 3
 5 -5 3 44.978 6.64137 2
 -5 -5 -3 21.3755 11.0139 3
 5 -5 3 37.3482 9.1382 3
 -5 5 -3 30.6156 8.1331 3
 5 5 3 27.1879 8.63357 3
 -5 5 -3 31.9127 7.29236 1
 -5 5 -3 27.4474 9.34153 3
 5 5 3 33.7742 10.3503 3
 -6 -5 -3 8.12005 7.8296 3
 6 -5 3 -2.6792 7.75571 3
 -6 -5 -3 13.7847 10.6688 3
 6 -5 3 16.3066 8.94707 3
 6 -5 3 -7.1156 5.84661 2
 6 5 3 4.42943 10.0276 3
 -6 5 -3 -3.5132 6.92452 1
 6 5 3 -3.329 8.22401 3
 -6 5 -3 5.5733 7.42054 3
 -6 5 -3 -3.9273 8.21634 3
 -7 -5 -3 5.44738 8.43194 3
 7 -5 3 18.2476 8.83338 3
 7 -5 3 -3.1861 9.34096 3
 -7 -5 -3 1.48358 10.6891 3
 -7 5 -3 11.0421 7.8032 3
 7 5 3 10.3928 8.91953 3
 -7 5 -3 10.0778 8.96213 3
 7 5 3 12.0105 9.96862 3
 -7 5 -3 5.63437 7.70425 1
 8 -5 3 2.70792 9.64081 3
 -8 -5 -3 35.3873 12.5706 3
 -8 -5 -3 10.7668 11.1959 3
 8 -5 3 19.2163 10.7097 3
 -8 5 -3 9.16036 9.91172 3
 -8 5 -3 3.60248 8.44842 3
 -8 5 -3 4.46402 9.58802 1
 8 5 3 28.4733 10.0102 3
 8 5 3 21.5088 12.2775 3
 -9 -5 -3 59.9433 10.9689 3
 9 -5 3 54.2401 11.9879 3
 -9 -5 -3 36.2873 14.2127 3
 9 -5 3 52.7214 10.829 3
 -9 5 -3 48.7675 12.546 3
 9 5 3 55.4606 11.5722 3
 -9 5 -3 47.0591 10.3357 3
 9 5 3 61.2002 15.347 3
 -9 5 -3 53.6162 10.52 1
 10 -5 3 13.9334 11.4712 3
 10 -5 3 4.29899 10.3263 3
 -10 -5 -3 2.75408 13.376 3
 -10 -5 -3 26.4525 10.4521 3
 10 5 3 26.0697 14.5953 3
 -10 5 -3 12.2752 9.39229 3
 10 5 3 22.9667 10.9634 3
 -10 5 -3 7.86633 12.4733 3
 -10 5 -3 13.3406 9.99645 1
 -11 -5 -3 -9.6306 14.1631 3
 -11 -5 -3 -3.3063 10.5311 3
 11 -5 3 -3.7077 10.8232 3
 11 -5 3 -16.701 11.8083 3
 11 5 3 2.95174 11.4426 3
 -11 5 -3 -6.4916 13.3726 3
 -11 5 -3 -0.0024 10.4766 1
 11 5 3 4.94347 13.591 3
 -11 5 -3 16.5893 10.511 3
 -12 -5 -3 -4.3138 11.3278 3
 12 -5 3 17.6839 12.64 3
 12 -5 3 -23.927 13.4236 3
 12 5 3 37.2903 14.9074 3
 -12 5 -3 -1.9824 13.9645 3
 12 5 3 3.42304 12.8283 3
 -12 5 -3 23.902 12.2593 3
 -12 5 -3 4.78313 11.502 1
 13 -5 3 30.4204 16.3763 3
 -13 -5 -3 -19.135 12.8605 3
 13 -5 3 -12.025 12.8977 3
 -13 -5 -3 15.9398 17.5698 3
 13 5 3 5.77053 14.3943 3
 -13 5 -3 14.2052 13.5652 1
 13 5 3 -22.762 16.6059 3
 -13 5 -3 23.6162 13.4401 3
 -13 5 -3 4.76556 16.6814 3
 -13 -6 3 -9.0838 18.5502 3
 13 -6 -3 16.5123 15.9686 3
 -13 -6 3 39.5451 14.5561 3
 -13 -6 3 6.85656 7.80806 1
 13 -6 -3 12.3565 15.0635 3
 -13 6 3 -37.632 18.3391 3
 13 6 -3 82.0594 20.1361 3
 -13 6 3 3.16483 15.8347 3
 -13 6 3 47.7208 15.9935 1
 13 6 -3 17.7142 14.5092 3
 -12 -6 3 47.0596 7.92564 1
 -12 -6 3 21.4701 17.253 3
 12 -6 -3 42.7497 14.8025 3
 -12 -6 3 30.3718 13.6579 3
 12 -6 -3 36.0295 13.6569 3
 -12 6 3 12.4197 12.0289 3
 12 6 -3 58.0943 18.2072 3
 -12 6 3 24.9996 15.3899 3
 12 6 -3 31.5173 14.3878 3
 -12 6 3 41.3552 14.9395 1
 -11 -6 3 61.293 17.3478 3
 11 -6 -3 45.5806 12.4989 3
 -11 -6 3 59.0786 7.20889 1
 11 -6 -3 61.1296 14.095 3
 -11 -6 3 60.8721 12.4702 3
 -11 6 3 68.3292 13.9215 1
 11 6 -3 53.9256 17.8917 3
 11 6 -3 48.8257 14.2513 3
 -11 6 3 48.3381 14.8802 3
 -11 6 3 69.8358 12.6531 3
 10 -6 -3 36.5651 11.6367 3
 -10 -6 3 -3.4464 14.0148 3
 10 -6 -3 -11.129 10.3448 3
 -10 -6 3 15.6317 10.5875 3
 -10 -6 3 8.7527 6.74182 1
 10 6 -3 9.85818 13.9868 3
 -10 6 3 16.7939 11.3009 1
 10 6 -3 5.75914 11.7801 3
 -10 6 3 16.3529 10.2001 3
 -10 6 3 -25.085 10.9071 3
 -9 -6 3 44.6729 15.965 3
 -9 -6 3 46.4287 11.1332 3
 -9 -6 3 65.4481 7.59803 1
 9 -6 -3 49.7026 10.9891 3
 9 -6 -3 43.3733 11.2815 3
 -9 6 3 39.7516 11.9815 3
 9 6 -3 35.4005 15.1097 3
 -9 6 3 37.1217 10.7852 3
 -9 6 3 47.4006 11.4249 1
 9 6 -3 56.0675 12.1263 3
 -8 -6 3 -11.174 9.14623 3
 -8 -6 3 0.89173 13.4791 3
 8 -6 -3 22.4838 10.62 3
 8 -6 -3 4.26762 9.57693 3
 8 -6 -3 4.60791 5.66295 2
 8 6 -3 13.0813 10.2795 3
 -8 6 3 -5.2451 9.22926 1
 -8 6 3 5.41197 9.31341 3
 8 6 -3 23.7071 13.2701 3
 -8 6 3 3.86184 10.5445 3
 7 -6 -3 132.025 16.2634 3
 -7 -6 3 154.807 16.2727 3
 7 -6 -3 134.971 16.4674 3
 7 6 -3 147.643 17.9394 3
 -7 6 3 146.853 14.8564 3
 -7 6 3 128.652 15.6353 1
 7 6 -3 135.191 16.2807 3
 -7 6 3 131.998 18.0953 3
 7 6 -3 158.199 13.9818 2
 6 -6 -3 -1.7241 8.53587 3
 6 -6 -3 7.38378 9.27814 3
 -6 -6 3 -1.9288 8.33084 3
 -6 -6 3 6.02311 8.45967 3
 6 -6 -3 -2.6251 8.45076 1
 -6 6 3 7.78881 9.92038 3
 6 6 -3 0.56294 11.9222 3
 -6 6 3 7.95396 8.10362 1
 6 6 -3 -0.5762 12.0303 3
 6 6 -3 -3.728 7.15261 2
 5 -6 -3 249.674 22.8509 3
 5 -6 -3 302.764 17.3464 1
 -5 -6 3 273.206 17.0233 3
 5 -6 -3 279.168 18.2328 3
 5 6 -3 282.633 18.7899 3
 -5 6 3 282.507 15.783 1
 5 6 -3 268.443 14.3747 2
 -5 6 3 262.972 21.3898 3
 -5 6 3 269.438 19.7082 3
 5 6 -3 285.776 21.9556 3
 4 -6 -3 9.73626 8.66392 3
 4 -6 -3 18.2185 8.39407 3
 -4 -6 3 14.032 8.56979 3
 4 -6 -3 16.3988 7.91572 1
 -4 -6 3 23.5209 8.62783 3
 -4 6 3 19.9397 9.70202 3
 4 6 -3 18.8978 9.33142 3
 4 6 -3 19.4304 6.39534 2
 -4 6 3 16.2984 18.6164 3
 4 6 -3 10.034 11.5628 3
 3 -6 -3 137.787 12.6986 1
 -3 -6 3 134.328 13.7231 3
 3 -6 -3 129.66 14.2387 3
 -3 -6 3 118.484 15.1348 3
 3 -6 -3 141.373 15.2617 3
 -3 6 3 120.711 13.0007 3
 -3 6 3 144.226 15.6767 3
 3 6 -3 128.95 15.2406 3
 3 6 -3 129.643 14.6456 3
 3 6 -3 118.141 10.2973 2
 -2 -6 3 -11.329 7.91952 3
 -2 -6 3 3.34126 7.95622 3
 2 -6 -3 3.04422 7.57206 3
 2 -6 -3 7.70416 6.63058 1
 2 -6 -3 7.54602 8.33247 3
 2 6 -3 17.1043 10.5047 3
 2 6 -3 4.46596 5.86906 2
 2 6 -3 9.78837 8.66325 3
 -2 6 3 4.02144 10.1436 3
 -2 6 3 25.3808 9.27537 3
 -1 -6 3 234.212 15.0952 3
 1 -6 -3 197.505 14.9282 3
 1 -6 -3 209.496 16.1045 3
 1 -6 -3 196.674 12.196 1
 -1 -6 3 198.055 15.5164 3
 -1 6 3 164.163 15.8795 3
 1 6 -3 198.009 10.9831 2
 1 6 -3 199.625 16.3727 3
 -1 6 3 191.743 18.9113 3
 1 6 -3 204.622 19.2865 3
 0 -6 3 -4.4377 7.57093 3
 0 -6 3 -4.2109 8.02239 3
 0 -6 -3 7.09759 7.33592 3
 0 -6 -3 -2.2509 5.85998 1
 0 -6 -3 -4.3902 8.09755 3
 0 6 -3 5.72911 8.23799 3
 0 6 -3 4.15789 9.29088 3
 0 6 -3 -4.9289 5.6212 2
 0 6 3 5.3241 8.54675 3
 0 6 3 -0.0358 10.3471 3
 -1 -6 -3 111.997 10.1533 1
 1 -6 3 131.679 13.7633 3
 -1 -6 -3 123.961 13.3882 3
 1 -6 3 111.336 11.6952 3
 -1 -6 -3 109.7 14.6067 3
 1 6 3 108.035 12.714 3
 -1 6 -3 126.449 15.2443 3
 1 6 3 117.086 14.7814 3
 -1 6 -3 121.749 14.1299 3
 -2 -6 -3 6.604 8.03188 3
 -2 -6 -3 1.44267 5.46575 1
 2 -6 3 7.76451 8.80476 3
 2 -6 3 8.05807 5.35303 2
 -2 -6 -3 7.82985 8.56347 3
 2 -6 3 2.55677 8.13753 3
 2 6 3 5.19075 4.49954 2
 -2 6 -3 9.58906 5.77804 1
 -2 6 -3 23.4586 9.28381 3
 2 6 3 11.2098 8.88645 3
 2 6 3 7.24154 11.0528 3
 -3 -6 -3 29.138 5.98572 1
 3 -6 3 26.5928 8.70732 3
 3 -6 3 42.2564 10.0302 3
 3 -6 3 31.9727 6.06497 2
 -3 -6 -3 35.441 9.11443 3
 -3 6 -3 36.0497 8.63064 3
 3 6 3 35.2021 9.81991 3
 3 6 3 34.9376 5.46954 2
 -3 6 -3 28.0909 6.82004 1
 -3 6 -3 27.1152 10.0184 3
 3 6 3 30.1013 11.8117 3
 -4 -6 -3 207.311 21.2009 3
 4 -6 3 162.132 16.7203 3
 -4 -6 -3 131.947 15.7107 3
 4 -6 3 136.731 15.4177 3
 4 -6 3 175.638 10.4284 2
 -4 6 -3 156.861 16.9002 3
 -4 6 -3 173.451 15.4453 3
 4 6 3 162.566 20.8966 3
 -4 6 -3 162.174 12.3216 1
 4 6 3 175.195 17.2804 3
 5 -6 3 -0.0309 9.23566 3
 5 -6 3 15.3222 9.27498 3
 5 -6 3 7.36923 6.48688 2
 -5 -6 -3 13.662 9.22791 3
 -5 -6 -3 -0.2725 10.0911 3
 -5 6 -3 -1.4588 8.56917 3
 -5 6 -3 -4.8584 7.21372 1
 5 6 3 -4.1808 11.4027 3
 5 6 3 1.70885 8.98219 3
 -5 6 -3 -0.934 10.0601 3
 6 -6 3 207.871 13.2846 2
 6 -6 3 215.307 17.4344 3
 -6 -6 -3 202.464 22.236 3
 6 -6 3 246.168 19.4051 3
 -6 -6 -3 231.211 18.3685 3
 -6 6 -3 197.752 18.9695 3
 6 6 3 212.482 22.1213 3
 -6 6 -3 228.615 15.5698 1
 6 6 3 213.741 19.5755 3
 -6 6 -3 218.742 17.247 3
 -7 -6 -3 71.7228 15.8417 3
 7 -6 3 79.5255 8.97184 2
 -7 -6 -3 57.018 11.6705 3
 7 -6 3 50.3755 11.2482 3
 7 -6 3 57.1439 12.4509 3
 -7 6 -3 73.0339 10.8492 1
 7 6 3 37.4989 14.1448 3
 -7 6 -3 58.4062 12.6609 3
 7 6 3 70.3678 13.57 3
 -7 6 -3 57.3359 10.924 3
 8 -6 3 113.673 13.1586 3
 8 -6 3 128.826 13.8533 2
 8 -6 3 130.153 15.2874 3
 -8 -6 -3 113.608 13.5168 3
 -8 -6 -3 185.305 25.1602 3
 -8 6 -3 144.986 16.618 1
 8 6 3 96.2469 15.2239 3
 8 6 3 137.414 14.7392 3
 -8 6 -3 104.466 14.132 3
 -8 6 -3 124.599 13.544 3
 -9 -6 -3 77.6869 13.2943 3
 9 -6 3 79.8232 10.8659 2
 -9 -6 -3 75.224 18.2417 3
 9 -6 3 85.2299 14.6751 3
 9 -6 3 89.6396 13.2652 3
 -9 6 -3 88.2613 12.7583 1
 -9 6 -3 84.3569 12.615 3
 9 6 3 77.4067 16.9716 3
 -9 6 -3 70.9997 15.3027 3
 9 6 3 89.6332 14.1608 3
 10 -6 3 38.6355 11.2589 2
 10 -6 3 56.9457 14.3389 3
 -10 -6 -3 58.7248 16.6734 3
 10 -6 3 47.1487 13.8228 3
 -10 -6 -3 44.0348 12.7199 3
 -10 6 -3 45.5468 15.0756 3
 -10 6 -3 50.6105 12.9908 3
 10 6 3 72.1114 18.3277 3
 10 6 3 38.1753 13.2498 3
 -10 6 -3 65.732 13.2909 1
 11 -6 3 23.5147 14.7741 3
 -11 -6 -3 45.6203 17.9451 3
 -11 -6 -3 41.8785 12.661 3
 11 -6 3 -5.9629 11.6421 3
 11 6 3 17.8562 17.5153 3
 11 6 3 12.6727 13.4388 3
 -11 6 -3 -16.4 11.8102 3
 -11 6 -3 -4.0467 15.4718 3
 -11 6 -3 21.8414 13.1807 1
 12 -6 3 -5.8733 13.1578 3
 -12 -6 -3 26.5519 14.9516 3
 12 -6 3 33.5736 17.3427 3
 -12 -6 -3 45.8111 21.4568 3
 12 6 3 14.4095 15.1149 3
 -12 6 -3 -9.4141 13.1458 3
 -12 6 -3 -13.582 16.0753 3
 -12 6 -3 21.864 14.7001 1
 12 6 3 13.7892 19.4928 3
 11 -7 -3 -4.2367 13.3763 3
 -11 -7 3 -15.211 14.1624 3
 11 -7 -3 3.84441 14.4238 3
 -11 -7 3 -6.7174 19.3306 3
 -11 7 3 -6.01 14.9108 1
 11 7 -3 10.9857 19.0003 3
 11 7 -3 -12.374 14.6401 3
 -11 7 3 3.19746 16.1378 3
 -11 7 3 7.23035 13.7355 3
 -10 -7 3 33.4789 14.0852 3
 10 -7 -3 10.2696 12.8862 3
 10 -7 -3 32.272 14.8836 3
 -10 7 3 10.4281 12.3149 3
 -10 7 3 49.1783 15.7929 3
 -10 7 3 22.0808 13.957 1
 10 7 -3 6.53932 17.4017 3
 10 7 -3 30.4129 12.1602 2
 10 7 -3 53.6618 15.4879 3
 9 -7 -3 25.3044 13.2739 3
 -9 -7 3 6.69527 12.5553 3
 9 -7 -3 31.8712 12.569 3
 -9 7 3 76.4149 12.785 3
 9 7 -3 35.859 11.1046 2
 9 7 -3 -22.449 16.0297 3
 -9 7 3 32.266 13.9819 3
 -9 7 3 12.6869 12.5773 1
 9 7 -3 3.37496 13.1228 3
 8 -7 -3 5.13275 11.5044 3
 -8 -7 3 -2.9804 11.2321 3
 -8 -7 3 20.9068 11.7142 3
 8 -7 -3 34.5016 12.3921 3
 -8 7 3 9.31036 12.9248 3
 8 7 -3 25.1393 9.51361 2
 8 7 -3 1.77795 12.0963 3
 -8 7 3 4.76312 10.8901 1
 8 7 -3 22.6417 16.8228 3
 -7 -7 3 32.9441 12.0759 3
 -7 -7 3 30.7438 11.6505 3
 7 -7 -3 36.468 12.1975 3
 7 -7 -3 46.7419 12.0339 3
 -7 7 3 22.2515 14.7983 3
 7 7 -3 18.2153 10.5268 2
 7 7 -3 43.5542 17.1225 3
 7 7 -3 15.4902 12.0962 3
 -7 7 3 31.885 13.8909 3
 -7 7 3 41.153 11.3236 1
 -6 -7 3 156.822 18.5871 3
 6 -7 -3 196.671 20.734 3
 6 -7 -3 189.642 18.5697 3
 -6 -7 3 156.731 17.9339 3
 6 7 -3 157.742 14.8086 2
 -6 7 3 163.621 18.3908 3
 6 7 -3 182.574 19.3906 3
 -6 7 3 182.754 20.1274 3
 6 7 -3 177.305 20.2327 3
 5 -7 -3 10.1672 9.71275 3
 -5 -7 3 4.26315 10.1537 3
 5 -7 -3 11.9518 10.8742 3
 5 -7 -3 30.0737 15.427 1
 -5 -7 3 17.8184 10.3781 3
 5 7 -3 23.7098 10.991 3
 -5 7 3 32.0702 13.5644 3
 5 7 -3 20.4281 8.1243 2
 5 7 -3 29.889 14.2603 3
 -5 7 3 9.55193 12.1171 3
 -4 -7 3 249.869 18.6574 3
 4 -7 -3 251.63 19.4891 3
 -4 -7 3 274.776 20.8637 3
 4 -7 -3 265.546 17.9229 1
 4 -7 -3 253.568 19.9244 3
 4 7 -3 263.297 14.5774 2
 4 7 -3 246.837 25.1256 3
 -4 7 3 246.303 23.2064 3
 4 7 -3 239.513 20.1796 3
 -4 7 3 244.301 21.3394 3
 3 -7 -3 14.645 8.53797 1
 3 -7 -3 10.1123 9.52614 3
 -3 -7 3 -3.4853 9.80896 3
 -3 -7 3 9.61264 10.0089 3
 3 -7 -3 -2.939 8.83344 3
 3 7 -3 8.31044 12.6597 3
 3 7 -3 -0.1982 7.00508 2
 -3 7 3 -12.575 11.8433 3
 -3 7 3 6.32711 10.1512 3
 -2 -7 3 150.262 19.4806 3
 -2 -7 3 142.786 16.004 3
 2 -7 -3 146.989 18.3096 3
 2 -7 -3 128.695 16.606 3
 2 -7 -3 151.738 14.2107 1
 -2 7 3 142.954 17.821 3
 2 7 -3 170.302 19.2921 3
 2 7 -3 139.284 12.0404 2
 -2 7 3 134.815 16.4722 3
 2 7 -3 139.704 16.8811 3
 -1 -7 3 7.87643 9.36332 3
 -1 -7 3 10.2376 10.2737 3
 1 -7 -3 0.22575 7.27868 1
 1 -7 -3 -1.7481 9.34278 3
 1 -7 -3 20.3894 14.4149 3
 1 7 -3 9.50286 12.3489 3
 1 7 -3 5.64289 9.87743 3
 -1 7 3 18.9435 12.3915 3
 -1 7 3 16.0805 10.7655 3
 1 7 -3 19.9922 7.09929 2
 0 -7 3 -9.1896 9.00503 3
 0 -7 -3 -3.1981 9.02367 3
 0 -7 3 7.07681 9.81758 3
 0 -7 -3 9.26387 6.83961 1
 0 -7 -3 10.6649 10.0839 3
 0 7 -3 12.1422 13.3689 3
 0 7 3 -10.65 12.3887 3
 0 7 -3 9.1453 10.7043 3
 0 7 3 17.272 10.4241 3
 1 -7 3 24.55 10.2301 3
 1 -7 3 24.4545 9.50799 3
 -1 -7 -3 13.402 10.1621 3
 -1 -7 -3 17.6459 6.91825 1
 -1 -7 -3 22.3631 9.97002 3
 -1 7 -3 8.96366 10.323 3
 -1 7 -3 26.5663 12.209 3
 1 7 3 15.7143 10.6593 3
 -2 -7 -3 5.44326 9.72946 3
 2 -7 3 4.75106 9.87679 3
 -2 -7 -3 9.27385 10.4867 3
 2 -7 3 16.2466 9.44907 3
 -2 -7 -3 6.29247 6.5034 1
 -2 7 -3 27.8507 13.4768 3
 2 7 3 0.74106 13.4312 3
 -2 7 -3 14.2461 11.0649 3
 2 7 3 0.9657 9.93952 3
 3 -7 3 29.3042 11.3617 3
 -3 -7 -3 13.9512 9.95494 3
 -3 -7 -3 27.2152 10.3652 3
 -3 -7 -3 17.4961 6.673 1
 3 -7 3 19.6508 9.97737 3
 3 7 3 13.6841 13.9135 3
 -3 7 -3 24.7214 11.7186 3
 -3 7 -3 32.4025 22.9599 3
 3 7 3 22.131 6.07861 2
 3 7 3 37.3864 11.4476 3
 -4 -7 -3 61.7803 12.1028 3
 4 -7 3 47.5882 6.94712 2
 -4 -7 -3 51.4761 11.2031 3
 4 -7 3 68.7803 12.7231 3
 -4 -7 -3 58.6428 7.57451 1
 4 7 3 69.9394 7.5379 2
 4 7 3 74.4789 15.5501 3
 -4 7 -3 57.1327 8.82746 1
 4 7 3 52.4575 12.4868 3
 -4 7 -3 54.0897 12.5124 3
 -5 -7 -3 152.575 11.2388 1
 5 -7 3 180.213 19.3023 3
 5 -7 3 148.837 11.4765 2
 -5 -7 -3 165.993 19.9828 3
 5 -7 3 169.08 18.5524 3
 -5 7 -3 128.337 14.4913 1
 5 7 3 163.563 12.1666 2
 -5 7 -3 162.271 20.9801 3
 5 7 3 175.604 22.1201 3
 -5 7 -3 164.484 17.8833 3
 5 7 3 176.678 19.8359 3
 6 -7 3 7.26666 6.82356 2
 -6 -7 -3 14.7502 11.5476 3
 6 -7 3 8.07998 10.3267 3
 -6 -7 -3 22.1428 14.6739 3
 6 -7 3 -4.7259 12.1442 3
 6 7 3 6.6406 14.654 3
 -6 7 -3 4.06606 9.37722 1
 -6 7 -3 -1.5934 11.9 3
 6 7 3 7.65565 11.7857 3
 -6 7 -3 2.60794 11.1666 3
 7 -7 3 130.616 15.7455 3
 7 -7 3 117.323 13.3116 2
 -7 -7 -3 111.307 15.0181 3
 -7 -7 -3 86.8816 16.8914 3
 7 -7 3 117.108 14.7772 3
 -7 7 -3 119.67 16.4204 3
 -7 7 -3 116.955 13.4592 1
 7 7 3 97.3092 19.7583 3
 -7 7 -3 137.41 14.6445 3
 7 7 3 102.154 16.1116 3
 -8 -7 -3 27.0376 12.3052 3
 -8 -7 -3 20.7272 17.8401 3
 8 -7 3 47.8929 9.73141 2
 8 -7 3 23.2056 13.412 3
 8 -7 3 35.4116 13.167 3
 8 7 3 32.7598 13.7252 3
 -8 7 -3 35.9734 12.3508 1
 -8 7 -3 43.6925 13.3411 3
 -8 7 -3 7.95847 14.4692 3
 8 7 3 31.3576 20.4458 3
 -9 -7 -3 112.895 16.0786 3
 9 -7 3 101.444 16.502 3
 -9 -7 -3 57.5671 19.7268 3
 9 -7 3 69.9739 14.7712 3
 9 -7 3 91.8791 11.6209 2
 9 7 3 110.215 28.9963 3
 -9 7 -3 85.4071 16.5625 3
 -9 7 -3 71.1709 15.1925 3
 9 7 3 100.636 16.9147 3
 -9 7 -3 100.88 14.4491 1
 10 -7 3 12.282 11.1002 2
 -10 -7 -3 15.5964 19.5742 3
 10 -7 3 -6.4901 15.3984 3
 10 -7 3 10.1482 13.0972 3
 -10 -7 -3 -10.378 13.2029 3
 -10 7 -3 16.0788 17.171 3
 -10 7 -3 2.16221 12.8672 1
 10 7 3 40.7721 21.1997 3
 -10 7 -3 -8.73 13.0172 3
 10 7 3 -35.039 14.2071 3
 8 -8 -3 5.90674 14.2901 3
 -8 -8 3 4.37829 13.8068 3
 8 -8 -3 -15.06 14.3471 3
 -8 -8 3 12.1296 14.2853 3
 8 8 -3 12.7301 13.6661 3
 -8 8 3 2.85432 15.9509 3
 -8 8 3 -23.071 17.5315 3
 8 8 -3 -22.542 19.4517 3
 8 8 -3 -5.3487 11.0296 2
 -7 -8 3 -10.869 13.3472 3
 7 -8 -3 -2.9143 13.256 3
 7 -8 -3 14.6058 13.9753 3
 -7 -8 3 10.2141 13.0514 3
 7 8 -3 -15.352 13.1155 3
 7 8 -3 -21.08 19.379 3
 7 8 -3 -1.877 10.056 2
 -7 8 3 -19.912 15.1141 3
 -7 8 3 19.4622 17.7741 3
 6 -8 -3 0.78629 13.0469 3
 6 -8 -3 31.5705 13.4276 3
 -6 -8 3 6.38327 13.1314 3
 -6 -8 3 -12.194 11.5798 3
 -6 8 3 38.1323 16.1683 3
 -6 8 3 6.67712 14.5352 3
 6 8 -3 -17.296 16.6581 3
 6 8 -3 6.217 12.3155 3
 6 8 -3 1.98439 11.4654 2
 5 -8 -3 8.8475 13.7204 3
 5 -8 -3 -9.5573 11.4143 3
 -5 -8 3 2.12934 12.0933 3
 -5 -8 3 23.7172 12.3412 3
 -5 8 3 -34.79 15.4683 3
 -5 8 3 -4.7037 13.7196 3
 5 8 -3 -7.2628 16.6687 3
 5 8 -3 5.91311 13.0663 3
 5 8 -3 -5.0313 9.40051 2
 4 -8 -3 -15.456 11.5226 3
 4 -8 -3 27.4117 11.9788 3
 -4 -8 3 -14.699 12.1313 3
 -4 -8 3 12.3792 12.1247 3
 -4 8 3 -6.8505 12.5853 3
 -4 8 3 3.89488 15.17 3
 4 8 -3 -4.4564 8.55629 2
 4 8 -3 6.60315 13.4851 3
 4 8 -3 -25.722 15.5823 3
 -3 -8 3 7.24554 11.5868 3
 3 -8 -3 17.1957 12.299 3
 3 -8 -3 5.49733 9.98832 1
 3 -8 -3 -4.2831 12.2502 3
 -3 -8 3 8.86798 12.3925 3
 3 8 -3 15.2185 12.3169 3
 3 8 -3 -9.4896 14.8394 3
 3 8 -3 1.05614 7.98891 2
 -3 8 3 -25.687 15.0286 3
 -3 8 3 -30.386 12.3788 3
 2 -8 -3 66.6807 11.17 1
 2 -8 -3 30.1428 12.5188 3
 -2 -8 3 64.3878 13.9947 3
 -2 -8 3 62.8841 13.1535 3
 2 -8 -3 56.0616 13.7874 3
 -2 8 3 70.4564 14.5737 3
 -2 8 3 61.956 16.6558 3
 2 8 -3 52.4491 14.0123 3
 2 8 -3 61.6728 21.3424 3
 2 8 -3 58.4757 9.58236 2
 -1 -8 3 -15.665 10.8124 3
 1 -8 -3 10.5535 9.21066 1
 1 -8 -3 -2.266 10.9815 3
 -1 -8 3 -13.027 11.1535 3
 1 -8 -3 11.1012 11.9011 3
 -1 8 3 1.36956 14.781 3
 1 8 -3 -12.885 16.3707 3
 1 8 -3 17.5293 12.6922 3
 -1 8 3 0.23431 11.6067 3
 0 -8 3 60.4184 15.3146 3
 0 -8 3 76.2019 14.2632 3
 0 -8 -3 68.688 10.8755 1
 0 -8 -3 99.4538 13.2415 3
 0 -8 -3 87.9278 15.1533 3
 0 8 3 41.7631 15.1751 3
 0 8 3 54.7815 13.8058 3
 0 8 -3 71.1715 14.1689 3
 0 8 -3 72.7184 17.6376 3
 1 -8 3 1.79319 10.543 3
 -1 -8 -3 20.6679 13.0474 3
 1 -8 3 13.2593 12.0188 3
 -1 -8 -3 -0.7913 11.4192 3
 -1 -8 -3 13.1805 7.94304 1
 -1 8 -3 -20.979 14.675 3
 -1 8 -3 9.14559 13.7605 3
 1 8 3 13.2301 13.5061 3
 1 8 3 -0.7033 14.7502 3
 2 -8 3 19.9673 11.8196 3
 -2 -8 -3 45.5067 12.4028 3
 -2 -8 -3 29.1962 7.62588 1
 2 -8 3 19.4671 12.167 3
 -2 -8 -3 56.5741 12.8904 3
 2 8 3 29.6105 16.8998 3
 -2 8 -3 32.7949 25.2428 3
 2 8 3 62.57 14.1323 3
 -2 8 -3 28.4007 16.6946 3
 3 -8 3 8.6671 11.5797 3
 -3 -8 -3 24.794 12.4844 3
 -3 -8 -3 33.3863 12.5181 3
 -3 -8 -3 26.2291 7.86935 1
 3 -8 3 45.9087 13.0269 3
 3 8 3 12.7905 16.784 3
 3 8 3 14.0077 13.4473 3
 -3 8 -3 21.5136 17.1734 3
 -3 8 -3 39.0536 16.7388 3
 4 -8 3 16.9248 12.8772 3
 4 -8 3 -24.703 12.9173 3
 -4 -8 -3 -6.7882 7.03066 1
 -4 -8 -3 -4.9893 11.7352 3
 -4 -8 -3 0.43891 12.0056 3
 -4 8 -3 17.7302 13.114 3
 4 8 3 -1.316 6.84581 2
 4 8 3 22.7259 16.5896 3
 -4 8 -3 3.38532 15.7007 3
 5 -8 3 23.8804 13.7771 3
 -5 -8 -3 13.2322 13.2276 3
 5 -8 3 12.5794 14.2035 3
 -5 -8 -3 4.23425 7.62137 1
 5 8 3 5.28736 7.54176 2
 -5 8 -3 3.45294 15.8379 3
 5 8 3 2.35309 18.5535 3
 5 8 3 3.44216 13.8477 3
 -5 8 -3 -13.514 13.8648 3
 6 -8 3 27.8947 14.2557 3
 -6 -8 -3 17.1611 12.8245 3
 -6 -8 -3 10.425 7.8042 1
 -6 -8 -3 -17.589 12.748 3
 6 -8 3 -10.578 13.8921 3
 -6 8 -3 1.89224 14.8539 3
 -6 8 -3 6.7452 10.1033 1
 6 8 3 23.8527 18.5498 3
 6 8 3 17.4364 8.54124 2
 6 8 3 -7.218 14.3698 3
 7 -8 3 3.99707 7.82851 2
 -7 -8 -3 -5.5617 13.7981 3
 -7 -8 -3 8.78427 7.8471 1
 -7 -8 -3 2.83854 14.501 3
 7 -8 3 29.2675 15.0157 3
 7 -8 3 15.4302 15.4155 3
 -7 8 -3 -25.432 10.5433 1
 7 8 3 24.5392 9.67488 2
 -7 8 -3 54.5033 16.3696 3
 7 8 3 -23.742 15.4974 3
 7 8 3 11.9882 19.6274 3
 -7 8 -3 33.5521 13.2715 3
 8 -8 3 18.5739 14.7475 3
 8 -8 3 12.926 17.3876 3
 -8 -8 -3 46.0363 15.779 3
 8 -8 3 27.0976 8.46502 2
 8 8 3 37.3427 11.1343 2
 -8 8 -3 24.6627 14.8098 3
 -8 8 -3 42.002 16.9844 3
 8 8 3 22.8944 17.4304 3
 8 8 3 65.8798 20.5903 3
 -3 -9 3 21.4177 15.1538 3
 3 -9 -3 -20.128 16.689 3
 -3 -9 3 -24.825 14.4839 3
 3 -9 -3 6.65049 14.7761 3
 3 9 -3 2.11034 10.5159 2
 -3 9 3 -5.7235 18.9253 3
 3 9 -3 23.3819 21.6607 3
 3 9 -3 11.9324 16.5501 3
 -3 9 3 14.679 17.1148 3
 -2 -9 3 101.163 16.9477 3
 2 -9 -3 106.525 16.4875 3
 -2 -9 3 73.2399 16.4121 3
 2 -9 -3 110.285 16.8152 3
 -2 9 3 94.2366 21.729 3
 2 9 -3 51.9551 16.8479 3
 2 9 -3 97.0013 22.6889 3
 -2 9 3 118.916 19.8545 3
 1 -9 -3 31.1691 11.8418 1
 1 -9 -3 -26.318 14.8852 3
 1 -9 -3 54.1821 16.3128 3
 -1 -9 3 -7.0713 13.8445 3
 -1 -9 3 12.1145 15.6783 3
 1 9 -3 30.7439 15.9641 3
 -1 9 3 34.6606 18.0012 3
 1 9 -3 -19.188 19.1848 3
 -1 9 3 43.8449 20.9748 3
 0 -9 -3 68.4253 15.9124 3
 0 -9 3 73.0184 16.6042 3
 0 -9 -3 88.1659 17.0966 3
 0 -9 -3 69.8628 11.7632 1
 0 -9 3 26.6855 14.9643 3
 0 9 3 42.8274 18.4319 3
 0 9 3 17.9232 15.5641 3
 0 9 -3 74.3503 18.6799 3
 -1 -9 -3 0.58751 13.943 3
 -1 -9 -3 2.06313 15.8685 3
 1 -9 3 5.46774 14.9888 3
 -1 -9 -3 17.4442 10.3896 1
 1 -9 3 -8.3951 14.8245 3
 1 9 3 -42.007 18.2804 3
 1 9 3 -21.607 15.0116 3
 -1 9 -3 9.1544 21.2304 3
 -1 9 -3 17.0035 17.1181 3
 -2 -9 -3 4.21958 15.1529 3
 -2 -9 -3 -15.166 14.9836 3
 2 -9 3 4.90484 13.6338 3
 -2 -9 -3 14.4743 9.73662 1
 2 -9 3 17.4819 14.9162 3
 2 9 3 37.1121 20.7004 3
 -2 9 -3 -29.026 19.0006 3
 2 9 3 -10.719 15.9945 3
 -2 9 -3 -20.12 15.6566 3
 -3 -9 -3 27.6063 16.3901 3
 3 -9 3 -1.4215 14.7521 3
 3 -9 3 8.51823 15.2092 3
 -3 -9 -3 41.1914 15.2948 3
 3 9 3 17.0106 17.2615 3
 -3 9 -3 -0.6691 21.1644 3
 -3 9 -3 44.6059 18.5565 3
 3 9 3 -12.467 21.5677 3
 -17 0 4 84.4751 14.5699 1
 17 0 -4 52.1848 16.2429 3
 17 0 -4 64.1634 13.9351 3
 -16 0 4 22.221 11.7303 1
 16 0 -4 25.7861 11.313 3
 -16 0 4 25.5933 10.6368 3
 16 0 -4 28.501 13.8566 3
 -15 0 4 40.1455 10.666 1
 15 0 -4 29.0609 10.424 3
 -15 0 4 35.7923 9.95102 3
 15 0 -4 5.23312 11.5128 3
 -14 0 4 85.5633 11.5595 1
 14 0 -4 83.4306 11.0655 3
 -14 0 4 88.5141 10.3527 3
 14 0 -4 100.156 13.6649 3
 13 0 -4 19.2049 8.37631 3
 -13 0 4 27.7964 7.75273 3
 -13 0 4 9.25318 8.18099 1
 13 0 -4 16.7473 9.79808 3
 -12 0 4 81.5947 9.14157 3
 12 0 -4 87.0493 9.58965 3
 -12 0 4 93.6946 12.9685 1
 12 0 -4 82.2422 10.9182 3
 11 0 -4 147.271 14.6132 3
 -11 0 4 130.193 13.0021 1
 -11 0 4 124.686 12.9321 3
 11 0 -4 124.012 11.8235 3
 -10 0 4 1675.95 44.9096 1
 -10 0 4 1691.22 43.7138 3
 10 0 -4 1680.88 43.947 3
 10 0 -4 1711.04 45.2863 3
 -9 0 4 24.0055 5.57664 3
 -9 0 4 31.2783 6.69498 1
 9 0 -4 25.895 8.47489 3
 9 0 -4 33.6196 6.16039 3
 8 0 -4 1858.44 47.0241 3
 -8 0 4 1922.52 48.0862 1
 -8 0 4 1899.98 46.9907 3
 7 0 -4 285.572 12.4361 3
 -7 0 4 270.155 10.8324 3
 -7 0 4 214.687 10.8852 3
 7 0 -4 279.033 10.9402 3
 -7 0 4 278.35 11.8312 1
 -6 0 4 205.923 9.91846 1
 -6 0 4 207.449 10.0164 3
 6 0 -4 193.124 8.96983 3
 6 0 -4 207.031 10.5876 3
 -6 0 4 198.784 8.96589 3
 5 0 -4 213.99 9.82604 3
 5 0 -4 221.315 8.66474 3
 -5 0 4 226.731 9.66638 1
 5 0 -4 235.139 9.61206 1
 -5 0 4 228.285 9.76671 3
 -5 0 4 227.251 8.56799 3
 4 0 -4 658.434 17.0153 3
 -4 0 4 662.407 16.973 3
 4 0 -4 668.379 17.6363 3
 4 0 -4 629.164 17.9551 1
 -4 0 4 686.253 17.5989 3
 -4 0 4 672.818 18.2065 1
 3 0 -4 383.752 10.5018 3
 -3 0 4 357.435 11.3956 1
 3 0 -4 370.786 9.76551 3
 3 0 -4 341.537 11.2749 1
 -3 0 4 363.517 9.75282 3
 -3 0 4 397.666 10.2531 3
 -2 0 4 68.6202 5.45982 1
 2 0 -4 65.9576 5.19328 1
 -1 0 4 7.81388 1.70827 3
 1 0 -4 -0.0847 2.62026 2
 -1 0 4 -2.7196 2.73075 2
 1 0 -4 5.26548 1.39298 3
 -1 0 4 2.98866 1.60495 3
 0 0 4 409.32 10.3985 3
 0 0 4 335.765 10.1821 2
 0 0 -4 386.77 10.6155 3
 0 0 -4 327.428 10.4064 3
 1 0 4 696.879 18.1082 3
 -1 0 -4 701.134 17.9896 3
 -1 0 -4 677.708 18.8375 3
 1 0 4 688.57 18.5921 3
 2 0 4 444.278 14.0133 3
 2 0 4 467.354 14.9531 3
 -2 0 -4 461.948 13.9487 3
 -2 0 -4 451.428 15.0263 3
 -3 0 -4 2376.89 56.5334 3
 -3 0 -4 2350.46 57.3142 3
 3 0 4 2267.03 56.414 3
 3 0 4 2408.4 57.317 3
 4 0 4 669.405 20.0252 3
 -4 0 -4 678.408 21.5441 3
 4 0 4 702.388 21.4234 3
 -4 0 -4 692.941 20.0496 3
 -5 0 -4 822.422 25.4606 3
 5 0 4 863.066 25.4478 3
 -5 0 -4 852.718 24.144 3
 5 0 4 850.034 24.1902 3
 -6 0 -4 857.243 26.9324 3
 -6 0 -4 888.463 25.5031 3
 6 0 4 858.475 25.4061 3
 6 0 4 901.493 26.9779 3
 -7 0 -4 3.66656 7.12142 3
 7 0 4 6.07893 5.57507 3
 -7 0 -4 4.74447 5.56048 3
 7 0 4 2.192 7.19674 3
 8 0 4 1.42005 7.54242 3
 -8 0 -4 -11.331 6.88664 3
 -8 0 -4 -2.2166 5.70177 3
 8 0 4 -1.0007 5.82609 3
 -9 0 -4 437.644 21.0748 3
 9 0 4 450.34 18.7874 3
 9 0 4 467.109 20.7947 3
 -9 0 -4 480.189 18.9488 3
 -10 0 -4 90.6122 11.7735 3
 -10 0 -4 84.8048 9.59949 3
 10 0 4 93.4711 12.9097 3
 10 0 4 102.415 12.0514 3
 -11 0 -4 44.9463 10.176 3
 11 0 4 41.4531 11.3854 3
 -11 0 -4 38.8923 11.333 3
 11 0 4 42.665 8.99961 3
 -12 0 -4 307.722 22.6889 3
 -12 0 -4 382.81 20.0757 3
 12 0 4 349.71 19.8276 3
 12 0 4 392.418 23.0907 3
 13 0 4 219.693 18.7606 3
 13 0 4 224.071 22.6949 3
 -13 0 -4 167.622 21.5182 3
 -13 0 -4 213.659 18.5934 3
 14 0 4 13.1497 10.8513 3
 -14 0 -4 -9.2973 12.6279 3
 -14 0 -4 14.3673 11.2683 1
 -14 0 -4 -1.5648 10.2324 3
 14 0 4 32.3829 14.5318 3
 15 0 4 208.376 25.743 3
 -15 0 -4 151.993 20.5861 1
 -15 0 -4 178.214 20.2212 3
 15 0 4 202.415 21.5049 3
 -15 0 -4 215.853 21.4559 3
 -16 0 -4 33.9048 17.3854 3
 16 0 4 -5.5549 12.4731 3
 -16 0 -4 -4.4755 13.6268 1
 -16 0 -4 15.6039 12.8973 3
 16 0 4 -34.478 14.5327 3
 17 -1 -4 28.4688 15.3875 3
 17 -1 -4 11.3269 13.1227 3
 -17 -1 4 -13.007 16.1353 3
 -17 -1 4 15.7051 12.4694 1
 -17 1 4 27.9915 14.8313 1
 17 1 -4 -18.816 14.9722 3
 17 1 -4 10.8404 13.1112 3
 -16 -1 4 -22.921 10.3849 3
 16 -1 -4 -23.341 12.1479 3
 16 -1 -4 -20.789 10.4667 3
 -16 -1 4 -18.078 13.92 3
 -16 -1 4 22.3606 10.6833 1
 16 1 -4 -10.875 12.8059 3
 -16 1 4 13.4969 10.0754 3
 -16 1 4 16.8783 12.2055 1
 16 1 -4 -9.938 10.4884 3
 -15 -1 4 8.21882 11.5506 3
 -15 -1 4 11.8973 9.28205 3
 15 -1 -4 -11.466 12.0219 3
 -15 -1 4 10.4639 9.21692 1
 15 -1 -4 -4.3256 9.56738 3
 -15 1 4 7.6818 9.78947 1
 -15 1 4 0.30563 8.67982 3
 15 1 -4 21.4472 12.6382 3
 15 1 -4 -14.152 9.46004 3
 -14 -1 4 20.6885 8.84347 3
 14 -1 -4 19.0857 11.2419 3
 14 -1 -4 13.0182 8.49575 3
 -14 -1 4 2.20238 8.70499 1
 -14 -1 4 -1.6464 10.9162 3
 -14 1 4 -3.911 7.51272 3
 -14 1 4 -13.327 9.26782 1
 14 1 -4 13.1535 9.02614 3
 14 1 -4 16.1719 11.085 3
 -13 -1 4 51.7564 9.9795 1
 13 -1 -4 68.4392 11.4372 3
 13 -1 -4 65.4304 9.99346 3
 -13 -1 4 48.2988 12.8179 3
 -13 -1 4 60.0203 9.53076 3
 -13 1 4 35.4162 9.93595 1
 13 1 -4 42.8118 11.3102 3
 -13 1 4 58.6115 8.84966 3
 13 1 -4 59.4798 9.86264 3
 12 -1 -4 58.3592 8.57115 3
 -12 -1 4 54.937 8.55004 3
 12 -1 -4 52.7744 9.9607 3
 -12 -1 4 73.92 14.8844 3
 -12 -1 4 63.6821 9.57744 1
 -12 1 4 62.3595 8.5307 3
 -12 1 4 65.3781 9.56032 1
 12 1 -4 58.2173 9.15668 3
 12 1 -4 53.4212 10.4388 3
 11 -1 -4 223.73 13.3423 3
 -11 -1 4 218.434 14.0415 1
 11 -1 -4 231.326 15.6658 3
 11 1 -4 208.767 13.6722 3
 -11 1 4 174.525 21.3242 3
 -11 1 4 204.32 14.6116 1
 11 1 -4 214.72 15.8224 3
 10 -1 -4 56.2945 7.29784 3
 -10 -1 4 46.731 7.14998 3
 10 -1 -4 63.0082 8.55555 3
 -10 -1 4 45.0643 7.73275 1
 10 1 -4 47.132 8.78768 3
 -10 1 4 46.1678 6.64055 3
 10 1 -4 48.9371 7.20887 3
 -10 1 4 49.6273 7.7787 1
 -9 -1 4 132.233 10.5978 3
 -9 -1 4 134.099 10.775 1
 9 -1 -4 142.398 12.3312 3
 9 -1 -4 130.005 10.2419 3
 9 1 -4 144.456 12.9316 3
 -9 1 4 149.754 9.90514 3
 -9 1 4 149.113 11.4412 1
 9 1 -4 142.898 10.2887 3
 -8 -1 4 116.726 9.60152 1
 -8 -1 4 124.543 9.63239 3
 8 -1 -4 128.321 9.7219 3
 -8 1 4 107.902 10.1032 1
 8 1 -4 143.274 11.4052 3
 8 1 -4 127.662 9.50566 3
 -8 1 4 126.098 8.98153 3
 -7 -1 4 304.386 11.9064 3
 7 -1 -4 285.506 14.139 3
 7 -1 -4 296.945 11.7015 3
 -7 -1 4 308.16 12.0893 1
 7 1 -4 269.305 14.9122 3
 -7 1 4 297.356 11.2904 3
 7 1 -4 289.373 11.6869 3
 -7 1 4 299.471 12.8548 1
 6 -1 -4 185.45 8.71951 3
 6 -1 -4 206.027 10.2954 3
 6 -1 -4 161.194 10.3328 1
 -6 -1 4 192.346 9.01056 3
 -6 -1 4 151.584 8.87898 1
 -6 1 4 142.396 8.63892 3
 -6 1 4 164.507 8.37541 3
 -6 1 4 158.96 10.1928 1
 6 1 -4 156.859 8.8841 3
 -5 -1 4 15.8214 3.96736 3
 -5 -1 4 13.5589 3.91418 1
 5 -1 -4 15.9306 4.82047 1
 5 -1 -4 16.777 3.6868 3
 5 -1 -4 17.0235 4.42865 3
 -5 1 4 13.2888 5.01301 1
 5 1 -4 24.7418 5.25378 3
 -5 1 4 14.2063 3.53852 3
 -5 1 4 17.643 4.17545 3
 5 1 -4 21.2229 4.0798 3
 4 -1 -4 304.109 9.67859 3
 -4 -1 4 310.208 9.89042 1
 -4 -1 4 320.493 10.0122 3
 4 -1 -4 291.68 11.3059 1
 4 -1 -4 318.857 10.1777 3
 -4 -1 4 279.724 10.2277 3
 -4 1 4 325.054 10.2229 3
 4 1 -4 315.799 10.1009 3
 4 1 -4 341.667 11.1308 3
 -4 1 4 314.088 11.3946 1
 -4 1 4 299.209 9.49089 3
 3 -1 -4 377.748 12.5251 1
 -3 -1 4 409.332 10.7819 1
 -3 -1 4 361.614 11.3506 3
 -3 -1 4 384.655 11.0491 3
 3 -1 -4 377.326 10.6644 3
 3 -1 -4 378.253 11.1338 3
 3 1 -4 391.952 10.6895 1
 -3 1 4 398.093 12.5004 1
 -3 1 4 380.518 11.0406 3
 -3 1 4 380.166 10.5278 3
 3 1 -4 374.404 11.117 3
 3 1 -4 376.383 11.8864 3
 2 -1 -4 1097.84 27.6696 1
 2 -1 -4 1098.26 26.4716 3
 2 -1 -4 1089.85 26.6465 3
 -2 -1 4 1133.02 26.8614 3
 2 1 -4 1106.43 27.6023 2
 2 1 -4 1106.92 26.903 3
 -2 1 4 1172.51 27.7764 1
 2 1 -4 1114.49 26.2483 1
 -2 1 4 1089.27 26.6368 3
 2 1 -4 1109.04 28.4735 3
 1 -1 -4 4144.55 95.7343 2
 1 -1 -4 4102.76 96.5123 3
 -1 -1 4 4309.56 96.6921 2
 -1 -1 4 4193.93 96.3427 3
 1 1 -4 4134.64 96.1821 3
 1 1 -4 4151.31 96.6247 2
 1 1 -4 4093.04 96.3576 3
 -1 1 4 4128.53 95.7212 2
 -1 1 4 4345.92 96.5659 3
 0 -1 4 1129.84 28.0214 3
 0 -1 -4 1117.11 27.6814 3
 0 -1 4 1184.69 27.9425 2
 0 -1 -4 1066.62 28.1916 3
 0 -1 4 1206.38 27.8187 3
 0 1 -4 1226.45 27.7791 3
 0 1 -4 1105.92 28.0011 3
 0 1 4 1107.9 28.3194 3
 0 1 -4 1119.6 27.8376 2
 1 -1 4 2142.54 50.2261 3
 -1 -1 -4 2116.97 50.5329 3
 1 -1 4 2137.62 49.8838 3
 1 -1 4 1992.44 49.608 2
 -1 -1 -4 2086.85 49.8673 3
 -1 1 -4 2173.53 49.8631 3
 1 1 4 2057.63 49.8547 3
 1 1 4 2112.86 50.4583 3
 -1 1 -4 2120.03 50.3149 3
 2 -1 4 2474.34 58.2009 3
 -2 -1 -4 2506.64 58.3077 3
 2 -1 4 2484.73 58.6669 3
 -2 -1 -4 2346.05 58.8308 3
 -2 1 -4 2535.19 58.1889 3
 2 1 4 2403.45 58.2165 3
 -2 1 -4 2388.48 58.5956 3
 2 1 4 2479.63 58.9001 3
 3 -1 4 1071.5 28.0782 3
 3 -1 4 1104.92 29.0244 3
 -3 -1 -4 1084.94 28.1792 3
 -3 -1 -4 1079.55 29.3853 3
 3 1 4 1088.7 28.282 3
 3 1 4 1111.04 29.2679 3
 -3 1 -4 1098.72 28.0711 3
 -3 1 -4 1077.25 28.8424 3
 -4 -1 -4 57.5615 8.04296 3
 4 -1 4 62.6959 8.03155 3
 4 -1 4 57.8155 6.73724 3
 -4 -1 -4 62.2213 7.38867 3
 -4 1 -4 58.1067 7.90308 3
 -4 1 -4 62.1376 6.99478 3
 4 1 4 56.9774 6.92461 3
 4 1 4 63.4126 8.38675 3
 -5 -1 -4 482.45 18.7596 3
 5 -1 4 515.276 18.4304 3
 -5 -1 -4 528.615 17.0718 3
 5 -1 4 495.186 16.6167 3
 5 1 4 491.241 17.0122 3
 -5 1 -4 493.717 18.2103 3
 5 1 4 493.54 18.3583 3
 -5 1 -4 497.091 16.5313 3
 -6 -1 -4 19.6649 5.73355 3
 6 -1 4 21.4999 6.02416 3
 6 -1 4 14.0685 7.44627 3
 -6 -1 -4 20.8118 7.72865 3
 6 1 4 20.5558 6.11075 3
 -6 1 -4 22.5529 7.05562 3
 6 1 4 9.28181 6.92359 3
 -6 1 -4 21.9899 5.82823 3
 -7 -1 -4 117.833 11.3733 3
 7 -1 4 129.034 11.3053 3
 -7 -1 -4 114.419 13.6763 3
 7 -1 4 106.091 12.961 3
 -7 1 -4 120.257 10.85 3
 7 1 4 124 13.302 3
 -7 1 -4 118.286 13.4988 3
 7 1 4 125.152 11.3123 3
 8 -1 4 45.8863 9.09975 3
 -8 -1 -4 55.6198 7.77488 3
 -8 -1 -4 39.5644 9.02783 3
 8 -1 4 51.1091 7.90597 3
 -8 1 -4 39.2747 8.96074 3
 -8 1 -4 47.2839 7.25962 3
 8 1 4 59.3596 9.51478 3
 8 1 4 51.6043 7.98092 3
 9 -1 4 15.1342 9.1028 3
 9 -1 4 12.6426 7.35592 3
 -9 -1 -4 12.7827 7.27163 3
 -9 -1 -4 10.8628 8.9046 3
 9 1 4 11.6367 7.16473 3
 9 1 4 13.4005 8.52577 3
 -9 1 -4 9.6701 6.83074 3
 -9 1 -4 15.7408 8.49344 3
 10 -1 4 31.2982 9.89966 3
 10 -1 4 38.8349 8.61426 3
 -10 -1 -4 39.4147 10.7252 3
 -10 -1 -4 40.6005 8.8945 3
 -10 1 -4 34.1394 8.11856 3
 10 1 4 34.3958 8.89879 3
 10 1 4 43.7417 10.4203 3
 -10 1 -4 26.7995 9.8278 3
 11 -1 4 405.396 19.9898 3
 11 -1 4 417.535 22.4663 3
 -11 -1 -4 440.873 23.3503 3
 -11 -1 -4 407.914 24.4445 3
 11 1 4 404.46 20.4757 3
 -11 1 -4 417.177 22.8552 3
 11 1 4 402.89 22.5716 3
 -12 -1 -4 100.771 13.9237 3
 12 -1 4 113.854 12.1678 3
 12 -1 4 117.076 13.9625 3
 -12 -1 -4 114.683 12.3545 3
 -12 1 -4 78.7864 13.3914 3
 12 1 4 102.905 11.7765 3
 -12 1 -4 101.736 11.9832 3
 -12 1 -4 103.33 11.9972 1
 12 1 4 114.944 13.5337 3
 -13 -1 -4 71.5526 11.4592 3
 13 -1 4 77.7563 12.3478 3
 13 -1 4 73.2206 13.9037 3
 -13 -1 -4 57.6723 14.097 3
 -13 1 -4 61.9823 11.4289 1
 13 1 4 68.0179 13.5703 3
 13 1 4 66.0519 11.4246 3
 -13 1 -4 69.2902 13.8826 3
 -13 1 -4 79.5881 11.9203 3
 14 -1 4 75.9702 12.6595 3
 14 -1 4 62.4 15.4498 3
 -14 -1 -4 82.897 15.3873 3
 -14 -1 -4 85.0539 13.3131 3
 -14 1 -4 61.6978 15.236 3
 -14 1 -4 55.4437 11.3902 3
 14 1 4 70.4142 15.291 3
 14 1 4 74.8359 12.2956 3
 -14 1 -4 48.3207 11.6504 1
 -15 -1 -4 4.61034 11.0108 3
 15 -1 4 13.5626 11.8633 3
 15 -1 4 -3.7777 14.3977 3
 -15 -1 -4 -1.0025 11.5257 1
 -15 -1 -4 -17.129 13.8043 3
 15 1 4 24.7385 15.404 3
 -15 1 -4 -11.772 10.8464 1
 -15 1 -4 8.38795 14.9104 3
 15 1 4 21.2797 12.0639 3
 -15 1 -4 -5.8597 11.4 3
 -16 -1 -4 -12.741 17.4308 3
 -16 -1 -4 -16.991 12.149 1
 16 -1 4 7.85535 16.4536 3
 16 -1 4 21.1137 13.8109 3
 -16 -1 -4 2.3175 13.4239 3
 -16 1 -4 -13.919 13.0859 3
 -16 1 -4 33.6937 17.0012 3
 16 1 4 29.9695 13.7485 3
 -16 1 -4 14.0442 13.3173 1
 16 1 4 28.8455 17.3251 3
 16 -2 -4 61.8414 12.8959 3
 -16 -2 4 30.3688 16.5769 3
 -16 -2 4 45.722 11.5778 1
 -16 -2 4 12.4254 11.6793 3
 16 -2 -4 31.3722 14.1042 3
 -16 2 4 12.7947 11.284 3
 16 2 -4 48.2256 13.1325 3
 16 2 -4 29.4965 15.4699 3
 -16 2 4 31.2832 23.6008 3
 -16 2 4 57.2481 13.4224 1
 -15 -2 4 125.844 17.3918 1
 -15 -2 4 166.273 17.6502 3
 15 -2 -4 146.793 17.9637 3
 -15 -2 4 144.93 17.1978 3
 15 -2 -4 151.699 16.2732 3
 -15 2 4 167.091 19.6593 1
 -15 2 4 149.312 20.8439 3
 -15 2 4 122.767 16.6208 3
 15 2 -4 137.467 18.6105 3
 15 2 -4 125.152 16.7515 3
 -14 -2 4 -20.444 10.9138 3
 14 -2 -4 18.0429 11.448 3
 -14 -2 4 -7.3292 8.55868 1
 14 -2 -4 1.79922 9.09442 3
 -14 -2 4 3.2208 8.77816 3
 -14 2 4 15.2958 10.3291 1
 -14 2 4 9.13179 9.15716 3
 -14 2 4 -14.191 12.2848 3
 14 2 -4 -13.509 11.3241 3
 14 2 -4 3.35093 9.00749 3
 13 -2 -4 26.8906 10.762 3
 -13 -2 4 35.6064 9.24282 1
 -13 -2 4 8.23633 11.2231 3
 -13 -2 4 33.4921 9.32004 3
 13 -2 -4 18.3817 8.83229 3
 -13 2 4 24.4875 13.4629 3
 -13 2 4 18.6871 8.0967 3
 13 2 -4 31.423 11.442 3
 -13 2 4 22.5478 9.61363 1
 13 2 -4 29.2485 9.22822 3
 -12 -2 4 -12.969 9.78478 3
 -12 -2 4 3.42986 7.78748 3
 12 -2 -4 5.99543 7.48965 3
 12 -2 -4 -5.824 9.09563 3
 -12 -2 4 6.66923 7.7669 1
 -12 2 4 -4.5227 8.58842 1
 -12 2 4 5.46 7.0239 3
 12 2 -4 7.84258 7.8708 3
 12 2 -4 10.5316 10.0661 3
 11 -2 -4 8.65088 8.85419 3
 -11 -2 4 6.50484 6.50741 1
 -11 -2 4 5.13898 9.06215 3
 -11 -2 4 -2.3386 6.99834 3
 -11 2 4 1.64175 6.22925 3
 11 2 -4 8.22332 9.60722 3
 -11 2 4 -6.9398 8.78552 1
 -10 -2 4 22.6201 8.48552 3
 -10 -2 4 22.6424 6.22324 1
 10 -2 -4 22.7571 6.79734 3
 -10 -2 4 20.8216 6.96373 3
 10 -2 -4 15.8429 7.52993 3
 -10 2 4 12.742 6.13066 3
 -10 2 4 9.75699 7.50669 1
 10 2 -4 20.0462 6.82228 3
 10 2 -4 16.5222 8.62038 3
 -9 -2 4 39.224 8.10561 3
 9 -2 -4 39.3786 7.54173 3
 -9 -2 4 46.8162 6.80854 3
 9 -2 -4 49.4349 6.80722 3
 -9 -2 4 51.9503 6.48574 1
 9 2 -4 45.0549 8.224 3
 -9 2 4 44.1644 6.38971 3
 -9 2 4 39.1513 7.7097 1
 9 2 -4 46.804 7.07762 3
 -8 -2 4 119.584 8.81304 1
 8 -2 -4 137.526 10.8524 3
 -8 -2 4 114.913 11.787 3
 -8 -2 4 136.506 9.91066 3
 8 -2 -4 119.594 9.70854 3
 -8 2 4 121.66 10.9916 1
 -8 2 4 114.71 9.09627 3
 8 2 -4 114.079 9.81803 3
 8 2 -4 133.209 12.2945 3
 -7 -2 4 214.85 13.2493 3
 7 -2 -4 218.482 11.6833 3
 -7 -2 4 241.289 11.0717 3
 -7 -2 4 225.009 9.76948 1
 7 -2 -4 221.848 10.5808 3
 7 -2 -4 228.029 12.442 1
 -7 2 4 225.569 12.1378 1
 -7 2 4 234.949 10.4178 3
 7 2 -4 227.921 13.4981 3
 7 2 -4 218.983 10.898 3
 -6 -2 4 2202.72 52.6074 3
 6 -2 -4 2143.87 52.7285 3
 -6 -2 4 2166.71 51.5459 1
 6 -2 -4 2116.89 52.1583 3
 6 -2 -4 2210.41 53.8803 1
 -6 -2 4 1976.65 55.4461 3
 -6 2 4 2105.63 52.0017 3
 -6 2 4 2201.88 53.7535 1
 6 2 -4 2138.51 52.5732 3
 6 2 -4 2209.01 53.6255 3
 -5 -2 4 1403.38 33.3647 1
 -5 -2 4 1388.98 34.6498 3
 5 -2 -4 1387.34 34.8507 3
 5 -2 -4 1331.89 34.2093 3
 -5 -2 4 1259.74 37.6694 3
 5 -2 -4 1349.07 35.5568 1
 -5 2 4 1360.47 34.0903 3
 -5 2 4 1382.71 35.5424 1
 5 2 -4 1459.61 35.8955 3
 5 2 -4 1365.31 34.6747 3
 -4 -2 4 1267.3 29.4285 1
 -4 -2 4 1272.91 31.1743 3
 -4 -2 4 1142.8 32.5569 3
 4 -2 -4 1205.31 30.6824 3
 4 -2 -4 1239.74 31.2121 3
 4 -2 -4 1221.69 31.7667 1
 -4 2 4 1245.17 30.6021 3
 4 2 -4 1209.76 32.0634 3
 4 2 -4 1222.93 31.1854 3
 -4 2 4 1259.56 31.9498 1
 -3 -2 4 235.68 7.06335 1
 3 -2 -4 259.327 9.55969 3
 3 -2 -4 272.441 10.361 3
 3 -2 -4 233.556 10.7137 1
 -3 -2 4 288.993 10.3197 3
 -3 2 4 257.942 10.7041 1
 3 2 -4 288.937 10.6074 3
 -3 2 4 253.177 9.3143 3
 -2 -2 4 6048.29 135.455 3
 -2 -2 4 6080.95 135.178 3
 2 -2 -4 5786.75 135.517 1
 2 -2 -4 5817.36 135.208 3
 2 -2 -4 5852.78 134.948 3
 -2 2 4 5795.57 135.736 3
 2 2 -4 5835.97 135.987 3
 2 2 -4 5863.81 135.408 3
 -2 2 4 5619.28 136.345 3
 -2 2 4 5859.87 135.478 1
 2 2 -4 5763.01 135.151 2
 1 -2 -4 2098.09 51.3395 1
 -1 -2 4 2193.77 51.2283 3
 1 -2 -4 2103.41 51.2793 3
 -1 -2 4 2209.22 51.1005 2
 -1 -2 4 2146.69 51.534 3
 1 2 -4 2176.54 51.1651 3
 -1 2 4 2112.75 51.3515 3
 1 2 -4 2081.25 50.9875 2
 -1 2 4 2179.79 52.1508 3
 1 2 -4 2184.59 51.6868 3
 0 -2 4 1669.59 40.4188 2
 0 -2 -4 1669.25 40.9519 3
 0 -2 -4 1657.89 41.8447 3
 0 -2 4 1710.99 40.8108 3
 0 -2 4 1719.52 41.3064 3
 0 2 -4 1648.11 40.4482 2
 0 2 -4 1717.37 40.7972 3
 0 2 4 1603.91 40.8966 3
 0 2 4 1724.53 41.8828 3
 0 2 -4 1685.56 41.33 3
 1 -2 4 392.322 12.3572 3
 1 -2 4 355.315 13.1605 3
 -1 -2 -4 383.931 12.6479 3
 1 -2 4 378.674 11.7352 2
 -1 -2 -4 343.958 13.8916 3
 -1 2 -4 405.879 12.549 3
 1 2 4 356.484 12.5486 3
 -1 2 -4 365.426 13.2065 3
 1 2 4 369.763 14.0323 3
 2 -2 4 101.955 7.95093 3
 2 -2 4 90.3538 7.12021 2
 -2 -2 -4 104.181 8.1291 3
 -2 -2 -4 108.895 9.8093 3
 2 -2 4 103.906 8.84532 3
 2 2 4 108.01 10.451 3
 -2 2 -4 102.959 9.17554 3
 -2 2 -4 109.641 7.91438 3
 2 2 4 93.4737 8.1312 3
 3 -2 4 453.889 15.6627 3
 3 -2 4 440.181 14.7433 3
 -3 -2 -4 427.446 16.4822 3
 -3 -2 -4 456.997 14.9331 3
 -3 2 -4 432.553 15.7354 3
 3 2 4 448.121 14.981 3
 3 2 4 432.796 16.199 3
 -3 2 -4 461.489 14.6848 3
 4 -2 4 127.287 9.33234 3
 -4 -2 -4 131.859 12.4628 3
 4 -2 4 140.871 11.2569 3
 -4 -2 -4 136.388 9.76296 3
 4 2 4 122.71 9.85786 3
 -4 2 -4 142.533 11.2115 3
 4 2 4 140.253 11.9477 3
 -4 2 -4 125.964 9.28785 3
 -5 -2 -4 912.67 25.7485 3
 5 -2 4 880.11 25.4025 3
 5 -2 4 900.372 26.6509 3
 -5 -2 -4 883.108 27.4551 3
 5 2 4 887.735 27.1339 3
 5 2 4 884.911 25.7049 3
 -5 2 -4 925.762 25.453 3
 -5 2 -4 860.515 26.5111 3
 -6 -2 -4 107.585 10.3552 3
 -6 -2 -4 111.735 13.009 3
 6 -2 4 109.466 10.173 3
 6 -2 4 129.135 12.3048 3
 -6 2 -4 109.83 10.1153 3
 6 2 4 111.087 12.8007 3
 -6 2 -4 111.352 12.5505 3
 6 2 4 117.277 10.9046 3
 -7 -2 -4 210.673 15.6172 3
 7 -2 4 224.857 14.9835 3
 -7 -2 -4 222.209 12.9925 3
 7 -2 4 223.634 13.1196 3
 -7 2 -4 221.567 14.9138 3
 -7 2 -4 216.007 12.7747 3
 7 2 4 209.016 13.2408 3
 7 2 4 242.35 15.5173 3
 -8 -2 -4 167.435 15.7193 3
 8 -2 4 175.175 15.0538 3
 -8 -2 -4 183.676 13.1363 3
 8 -2 4 168.199 12.963 3
 8 2 4 159.055 13.1045 3
 -8 2 -4 167.396 12.966 3
 8 2 4 183.235 15.662 3
 -8 2 -4 183.671 15.3084 3
 -9 -2 -4 635.866 26.411 3
 -9 -2 -4 656.43 23.6423 3
 9 -2 4 624.953 23.6731 3
 9 -2 4 646.356 25.4365 3
 -9 2 -4 655.624 23.403 3
 9 2 4 660.522 23.7577 3
 -9 2 -4 690.583 23.4812 1
 9 2 4 627.256 25.9458 3
 -9 2 -4 644.198 25.226 3
 10 -2 4 192.627 18.9113 3
 -10 -2 -4 159.014 15.9625 3
 10 -2 4 174.428 15.7073 3
 -10 -2 -4 159.009 18.5416 3
 10 2 4 139.232 17.6216 3
 -10 2 -4 180.803 15.6427 3
 10 2 4 160.742 15.5316 3
 -10 2 -4 168.626 17.9182 3
 -10 2 -4 196.084 17.7166 1
 11 -2 4 39.435 12.1697 3
 -11 -2 -4 40.9404 11.9211 3
 -11 -2 -4 50.8228 10.8385 3
 11 -2 4 33.9674 11.6406 3
 -11 2 -4 59.9658 10.829 3
 11 2 4 42.7821 10.0436 3
 -11 2 -4 50.1376 12.2917 3
 -11 2 -4 47.6202 10.3441 1
 11 2 4 45.8016 12.3263 3
 12 -2 4 -4.9091 11.3718 3
 12 -2 4 12.8839 9.41199 3
 -12 -2 -4 4.17768 11.9342 3
 -12 -2 -4 24.3984 10.087 3
 -12 2 -4 8.07551 11.3404 3
 -12 2 -4 13.4978 9.90011 1
 12 2 4 6.97023 9.65078 3
 -12 2 -4 8.64372 9.76971 3
 12 2 4 -3.0517 11.1815 3
 -13 -2 -4 12.5077 10.72 3
 13 -2 4 22.6808 12.8201 3
 -13 -2 -4 22.7989 13.8874 3
 13 -2 4 12.9278 9.95724 3
 -13 2 -4 14.1431 10.201 3
 -13 2 -4 9.82707 10.244 1
 13 2 4 18.4933 10.6976 3
 -13 2 -4 10.7853 13.2411 3
 13 2 4 4.81102 12.0577 3
 14 -2 4 9.40402 10.9235 3
 -14 -2 -4 10.2819 14.1945 3
 -14 -2 -4 -19.151 9.98665 3
 14 -2 4 6.90874 14.2184 3
 -14 2 -4 19.7501 13.7443 3
 14 2 4 -10.675 10.6422 3
 -14 2 -4 -0.6171 10.7257 1
 14 2 4 2.03244 14.4023 3
 -14 2 -4 2.97723 11.2526 3
 -15 -2 -4 -8.8227 15.3706 3
 -15 -2 -4 18.8803 12.566 3
 15 -2 4 31.7387 12.4623 3
 15 -2 4 19.5906 16.2581 3
 -15 2 -4 -18.303 14.8513 3
 15 2 4 -7.4799 15.2955 3
 -15 2 -4 33.0705 13.0867 1
 -15 2 -4 -10.446 11.3181 3
 15 2 4 0.31665 12.8822 3
 -16 -3 4 108.873 13.5055 1
 -16 -3 4 94.3223 18.1554 3
 16 -3 -4 135.746 17.5591 3
 16 -3 -4 80.607 15.0498 3
 -16 -3 4 85.5594 16.1825 3
 -16 3 4 109.856 16.1581 3
 16 3 -4 96.4477 18.2136 3
 16 3 -4 94.2701 15.3305 3
 -16 3 4 58.5861 16.7893 3
 -16 3 4 73.3771 16.042 1
 -15 -3 4 150.157 18.7439 3
 -15 -3 4 111.638 14.804 3
 -15 -3 4 114.701 12.5042 1
 15 -3 -4 124.251 16.6616 3
 15 -3 -4 125.043 14.696 3
 -15 3 4 155.572 17.5101 3
 15 3 -4 140.543 18.9369 3
 15 3 -4 95.9464 13.5124 3
 -15 3 4 109.414 15.652 3
 -15 3 4 160.384 21.6443 1
 -14 -3 4 93.7204 12.7586 3
 14 -3 -4 101.636 13.6439 3
 -14 -3 4 79.065 15.3391 3
 14 -3 -4 71.1943 12.7278 3
 -14 -3 4 85.157 11.4345 1
 14 3 -4 61.99 15.4555 3
 -14 3 4 75.6904 10.4304 3
 -14 3 4 80.5886 13.8659 1
 -14 3 4 80.0938 14.3335 3
 14 3 -4 70.5161 11.939 3
 -13 -3 4 84.7873 12.114 3
 -13 -3 4 84.5834 14.5812 3
 13 -3 -4 90.2584 12.0886 3
 -13 -3 4 111.179 14.0976 1
 13 -3 -4 132.555 17.543 3
 13 3 -4 104.704 14.6008 3
 -13 3 4 100.003 13.7572 3
 13 3 -4 88.0306 11.745 3
 -13 3 4 133.338 14.4721 3
 -13 3 4 81.7632 12.6867 1
 -12 -3 4 72.3806 12.3374 3
 12 -3 -4 64.6756 11.0726 3
 -12 -3 4 77.8916 9.9873 1
 12 -3 -4 45.7842 10.662 3
 -12 -3 4 79.9548 10.7136 3
 12 3 -4 58.9844 12.983 3
 -12 3 4 107.879 12.9402 3
 -12 3 4 59.5703 11.7 3
 -12 3 4 53.5851 10.8115 1
 12 3 -4 65.8015 10.2261 3
 -11 -3 4 18.1755 9.85689 3
 -11 -3 4 11.0457 7.90666 3
 11 -3 -4 44.3326 9.41091 3
 -11 -3 4 31.6795 7.05572 1
 11 -3 -4 4.66243 7.94552 3
 11 3 -4 30.7289 10.0456 3
 -11 3 4 17.3081 9.1635 1
 11 3 -4 16.7585 8.13867 3
 -11 3 4 20.0734 9.55722 3
 -11 3 4 30.4046 7.41354 3
 -10 -3 4 12.0633 5.87493 1
 10 -3 -4 12.5478 7.52012 3
 -10 -3 4 16.1577 7.55038 3
 -10 -3 4 15.0775 9.29958 3
 10 -3 -4 9.68034 7.96926 3
 -10 3 4 6.59104 6.35075 3
 10 3 -4 23.1089 9.91384 3
 -10 3 4 14.9761 8.81457 3
 10 3 -4 13.125 7.29277 3
 -10 3 4 10.1854 13.8912 1
 -9 -3 4 135.667 9.56434 1
 9 -3 -4 125.741 12.9203 3
 -9 -3 4 145.156 14.714 3
 9 -3 -4 133.211 12.0089 3
 -9 -3 4 128.762 11.7487 3
 9 3 -4 115.494 11.6539 3
 -9 3 4 126.321 10.9499 3
 -9 3 4 114.727 12.9999 3
 -9 3 4 136.369 13.3365 1
 9 3 -4 137.058 15.4269 3
 -8 -3 4 124.761 8.40674 1
 -8 -3 4 142.905 11.0945 3
 8 -3 -4 144.144 11.9125 3
 -8 -3 4 127.922 13.5536 3
 8 -3 -4 111.943 10.7 3
 8 3 -4 152.443 14.0882 3
 -8 3 4 128.858 10.1849 3
 -8 3 4 133.121 12.2102 3
 8 3 -4 141.373 11.3097 3
 -8 3 4 124.471 12.2125 1
 7 -3 -4 370.166 14.6145 3
 -7 -3 4 365.554 17.1623 3
 7 -3 -4 390.734 16.2332 1
 -7 -3 4 364.756 12.2885 1
 -7 -3 4 379.277 15.0167 3
 7 -3 -4 363.654 15.5028 3
 -7 3 4 367.743 15.7696 3
 -7 3 4 380.827 15.9862 1
 7 3 -4 377.403 15.2115 3
 7 3 -4 388.952 17.4028 3
 -7 3 4 380.718 14.208 3
 6 -3 -4 6.94739 5.59331 3
 -6 -3 4 17.86 7.25593 3
 6 -3 -4 3.2794 5.81081 1
 -6 -3 4 11.7684 5.10432 3
 6 -3 -4 -1.3053 4.72177 3
 -6 -3 4 3.04898 3.23684 1
 6 3 -4 7.82634 5.43011 3
 6 3 -4 11.3379 6.81282 3
 -6 3 4 2.98198 5.85539 1
 -6 3 4 7.58263 5.63399 3
 -6 3 4 1.10836 4.56507 3
 5 -3 -4 2243.85 55.6227 3
 5 -3 -4 2245.82 56.556 1
 5 -3 -4 2290.91 56.1801 3
 -5 -3 4 2312.26 56.1213 3
 -5 -3 4 2278.91 57.6299 3
 -5 -3 4 2265.32 53.2384 1
 5 3 -4 2328.2 56.3725 3
 -5 3 4 2192.33 56.1851 3
 -5 3 4 2237.44 55.3958 3
 5 3 -4 2291.08 57.4078 3
 -5 3 4 2335.38 56.6947 1
 4 -3 -4 127.153 9.69219 1
 -4 -3 4 159.682 11.9435 3
 4 -3 -4 128.595 9.0629 3
 -4 -3 4 143.5 9.78008 3
 4 -3 -4 147.556 9.89961 3
 -4 3 4 137.038 10.0833 3
 4 3 -4 145.69 10.1069 3
 -4 3 4 134.023 9.86898 1
 -4 3 4 117.451 8.53631 3
 4 3 -4 147.076 12.2605 3
 3 -3 -4 672.902 19.7387 1
 -3 -3 4 650.038 19.2554 3
 3 -3 -4 655.531 19.6711 3
 -3 -3 4 681.341 20.0774 3
 3 -3 -4 654.732 19.159 3
 -3 3 4 688.435 18.9824 3
 3 3 -4 668.677 20.2522 3
 3 3 -4 687.289 21.6815 3
 -3 3 4 665.067 20.1303 3
 3 3 -4 669.317 19.1388 2
 -3 3 4 672.691 19.6011 1
 2 -3 -4 7.58386 4.7496 1
 -2 -3 4 7.56799 4.51225 3
 2 -3 -4 4.49769 4.86474 3
 -2 -3 4 12.8244 5.14942 3
 2 -3 -4 7.27438 4.38964 3
 -2 3 4 13.2941 5.14962 3
 2 3 -4 15.3203 5.48502 3
 2 3 -4 11.5685 4.45727 2
 -2 3 4 10.6695 6.08342 3
 2 3 -4 23.5403 6.33302 3
 1 -3 -4 325.488 12.6064 3
 1 -3 -4 306.33 11.5822 1
 -1 -3 4 314.1 12.2388 3
 -1 -3 4 329.389 12.9327 3
 1 -3 -4 325.771 11.8993 3
 -1 -3 4 322.067 11.1066 2
 1 3 -4 305.953 11.1868 2
 1 3 -4 344.481 13.1862 3
 -1 3 4 311.061 12.4681 3
 -1 3 4 344.559 14.592 3
 0 -3 4 68.7301 6.78538 2
 0 -3 -4 75.6453 10.5053 3
 0 -3 4 73.8398 8.81234 3
 0 -3 4 64.5742 7.83437 3
 0 -3 -4 69.4371 8.53733 3
 0 3 -4 66.763 7.63052 3
 0 3 4 61.9552 6.67446 3
 0 3 -4 64.0893 4.82127 1
 0 3 -4 74.3002 6.85296 2
 0 3 4 66.9613 7.61079 3
 0 3 -4 71.0063 8.94344 3
 1 -3 4 146.621 9.61278 3
 1 -3 4 148.001 8.20772 2
 1 -3 4 163.021 10.5081 3
 -1 -3 -4 165.025 12.2516 3
 -1 -3 -4 148.927 9.90901 3
 -1 3 -4 156.637 9.39799 3
 -1 3 -4 142.545 7.24394 1
 1 3 4 156.28 10.135 3
 -1 3 -4 161.288 10.7123 3
 1 3 4 163.068 12.2542 3
 2 -3 4 22.1653 6.02073 3
 2 -3 4 11.582 5.13954 3
 2 -3 4 20.8045 4.66307 2
 -2 -3 -4 23.4017 6.83121 3
 -2 -3 -4 16.7132 5.24127 3
 -2 3 -4 17.3349 4.31312 1
 -2 3 -4 18.8082 5.38703 3
 -2 3 -4 26.8056 6.25231 3
 2 3 4 20.5427 6.87172 3
 2 3 4 22.7512 5.7506 3
 3 -3 4 35.1997 6.70941 3
 3 -3 4 30.1666 5.62685 3
 3 -3 4 25.8916 5.0283 2
 -3 -3 -4 22.8879 6.98478 3
 -3 -3 -4 25.5374 5.74937 3
 3 3 4 26.8148 7.57388 3
 3 3 4 36.3189 6.25617 3
 -3 3 -4 30.1517 5.24831 1
 -3 3 -4 33.2102 5.878 3
 -3 3 -4 33.2871 6.85835 3
 4 -3 4 198.093 12.8812 3
 -4 -3 -4 204.141 14.0646 3
 -4 -3 -4 195.41 11.5989 3
 4 -3 4 197.253 11.4759 3
 4 3 4 189.226 11.6604 3
 -4 3 -4 188.762 12.578 3
 -4 3 -4 196.393 11.1689 3
 -4 3 -4 194.146 10.6476 1
 4 3 4 189.181 13.9813 3
 -5 -3 -4 2.8459 5.48157 3
 -5 -3 -4 10.0551 7.38511 3
 5 -3 4 -3.3026 5.4018 3
 5 -3 4 -0.5556 6.235 3
 5 3 4 -2.7153 5.32265 3
 -5 3 -4 -2.5683 5.10865 1
 -5 3 -4 0.35798 5.42881 3
 5 3 4 7.73364 7.19005 3
 -5 3 -4 -4.6245 6.1618 3
 -6 -3 -4 1415.89 41.4065 3
 -6 -3 -4 1544.53 39.8233 3
 6 -3 4 1473.05 40.3955 3
 6 -3 4 1415.63 39.0323 3
 -6 3 -4 1484.56 39.1563 1
 6 3 4 1429.06 39.6219 3
 -6 3 -4 1489.33 39.2039 3
 -6 3 -4 1436.16 40.3105 3
 6 3 4 1486.54 41.4829 3
 7 -3 4 82.0042 9.56007 3
 -7 -3 -4 88.6885 11.2008 3
 7 -3 4 92.5644 11.7569 3
 -7 -3 -4 76.1704 8.62342 3
 -7 3 -4 81.3664 11.0862 3
 7 3 4 76.823 9.9659 3
 -7 3 -4 88.9938 10.3177 3
 -7 3 -4 75.9488 11.0211 1
 7 3 4 76.4882 8.94001 3
 -8 -3 -4 1003.35 30.5789 3
 8 -3 4 955.853 29.9515 3
 -8 -3 -4 941.052 33.1094 3
 8 -3 4 1018.46 31.8468 3
 8 3 4 971.656 30.9751 3
 -8 3 -4 1002.58 30.5138 1
 -8 3 -4 999.422 30.2713 3
 -8 3 -4 957.417 31.9595 3
 8 3 4 996.718 32.8484 3
 -9 -3 -4 141.841 18.1651 3
 9 -3 4 142.39 17.1834 3
 -9 -3 -4 145.975 14.5354 3
 9 -3 4 131.477 14.8663 3
 9 3 4 114.466 15.1103 3
 9 3 4 133.237 17.4607 3
 -9 3 -4 112.702 13.931 1
 -9 3 -4 116.942 15.9138 3
 -9 3 -4 123.156 14.1776 3
 -10 -3 -4 47.5888 12.611 3
 10 -3 4 42.2657 9.92072 3
 10 -3 4 55.4761 12.0652 3
 -10 -3 -4 50.5399 10.837 3
 -10 3 -4 39.9383 9.82782 1
 -10 3 -4 41.029 14.6068 3
 10 3 4 51.0296 10.2369 3
 -10 3 -4 64.5892 11.9898 3
 10 3 4 60.9695 12.8984 3
 -11 -3 -4 0.68237 8.843 3
 11 -3 4 11.2634 11.1049 3
 11 -3 4 20.9933 10.6146 3
 -11 -3 -4 11.7362 11.965 3
 11 3 4 7.58134 11.8659 3
 -11 3 -4 12.3554 9.4086 3
 11 3 4 20.4494 9.51842 3
 -11 3 -4 10.5558 9.51324 1
 -11 3 -4 10.9007 11.7035 3
 12 -3 4 47.7786 12.0046 3
 12 -3 4 54.9806 13.7126 3
 -12 -3 -4 65.5488 15.1052 3
 -12 -3 -4 58.9954 12.1758 3
 -12 3 -4 50.3787 11.0855 3
 -12 3 -4 52.3302 11.2429 1
 12 3 4 72.93 14.588 3
 -12 3 -4 70.6489 14.5617 3
 12 3 4 60.6645 11.911 3
 -13 -3 -4 10.0004 14.2455 3
 13 -3 4 15.3595 11.9618 3
 -13 -3 -4 25.256 12.2539 3
 13 -3 4 22.5285 14.1561 3
 -13 3 -4 15.4178 11.0536 1
 13 3 4 26.5192 14.6039 3
 -13 3 -4 29.229 14.287 3
 13 3 4 14.9117 11.2055 3
 -13 3 -4 20.1491 11.285 3
 14 -3 4 32.5233 13.2617 3
 -14 -3 -4 42.2882 13.9474 3
 14 -3 4 43.6125 16.6718 3
 -14 -3 -4 20.6667 16.6426 3
 14 3 4 39.6986 13.1273 3
 -14 3 -4 40.855 16.0505 3
 -14 3 -4 52.4126 13.151 1
 -14 3 -4 49.2746 12.3326 3
 14 3 4 63.9198 17.178 3
 -15 -3 -4 14.9091 14.8917 3
 15 -3 4 52.868 17.656 3
 -15 -3 -4 23.1137 18.6785 3
 15 -3 4 37.0533 14.8046 3
 -15 3 -4 24.9393 13.7741 3
 -15 3 -4 6.3875 16.8952 3
 -15 3 -4 37.7228 13.4511 1
 15 3 4 38.4165 14.7822 3
 15 3 4 45.9878 17.1953 3
 15 -4 -4 -15.139 13.1045 3
 15 -4 -4 3.08914 13.8751 3
 -15 -4 4 -21.037 16.8248 3
 -15 -4 4 3.00674 9.52426 1
 -15 -4 4 -11.339 14.7378 3
 -15 4 4 5.56987 12.9558 1
 -15 4 4 -3.6029 15.3219 3
 15 4 -4 24.8693 13.2971 3
 14 -4 -4 -17.355 11.2681 3
 -14 -4 4 -16.173 14.5194 3
 -14 -4 4 24.3188 17.6682 1
 14 -4 -4 15.9054 12.8265 3
 -14 -4 4 3.40638 11.3646 3
 14 4 -4 13.6568 10.5544 3
 14 4 -4 -0.6048 15.0774 3
 -14 4 4 42.6189 11.1218 3
 -14 4 4 36.1186 13.1851 1
 -14 4 4 -8.1076 13.6046 3
 13 -4 -4 5.44126 11.172 3
 -13 -4 4 12.4794 7.72408 1
 -13 -4 4 8.87426 10.4109 3
 13 -4 -4 24.3896 10.5147 3
 -13 -4 4 6.18223 13.5689 3
 -13 4 4 17.4932 12.3022 3
 -13 4 4 34.0621 9.921 3
 -13 4 4 23.4793 11.6225 1
 13 4 -4 24.3172 13.3527 3
 13 4 -4 19.7072 9.78312 3
 12 -4 -4 -14.688 9.84286 3
 -12 -4 4 -5.1309 9.25524 3
 12 -4 -4 13.6192 9.73919 3
 -12 -4 4 20.0249 12.5467 3
 -12 -4 4 19.8709 7.43003 1
 -12 4 4 13.7357 8.72818 3
 12 4 -4 5.03894 9.07777 3
 -12 4 4 15.725 11.9037 3
 12 4 -4 15.7987 12.4334 3
 -12 4 4 22.0487 11.0094 1
 -11 -4 4 25.2884 8.99654 3
 11 -4 -4 18.064 9.97721 3
 11 -4 -4 14.1916 8.94418 3
 -11 -4 4 33.7109 12.0855 3
 -11 -4 4 23.9467 7.47059 1
 11 4 -4 26.3142 9.12605 3
 -11 4 4 2.74306 8.27289 3
 -11 4 4 13.5713 10.2735 3
 -11 4 4 18.3184 10.2435 1
 11 4 -4 38.7085 11.8905 3
 -10 -4 4 -3.9427 7.60567 3
 -10 -4 4 -8.4326 10.2695 3
 -10 -4 4 8.3053 5.74429 1
 10 -4 -4 5.46567 8.13381 3
 10 -4 -4 2.72919 7.75906 3
 -10 4 4 -1.8104 7.32231 3
 -10 4 4 1.77323 9.05394 3
 10 4 -4 8.42968 10.3521 3
 -10 4 4 -1.2391 9.01721 1
 10 4 -4 7.62407 7.57197 3
 -9 -4 4 8.8992 7.19191 3
 -9 -4 4 6.45136 9.7444 3
 -9 -4 4 6.15035 4.86227 1
 9 -4 -4 0.27463 8.07464 3
 -9 4 4 6.85196 8.71655 3
 9 4 -4 8.97537 9.78658 3
 -9 4 4 -14.853 13.4738 1
 9 4 -4 2.87328 8.8137 3
 -9 4 4 1.22375 6.58357 3
 -8 -4 4 4.33337 6.73436 3
 -8 -4 4 -0.7038 4.28658 1
 8 -4 -4 7.30331 6.982 3
 -8 -4 4 5.86316 9.10326 3
 8 -4 -4 4.54051 7.2652 3
 8 4 -4 4.57495 8.8805 3
 -8 4 4 8.49897 6.62147 3
 -8 4 4 -3.0486 7.31878 1
 8 4 -4 14.1801 7.1983 3
 -8 4 4 7.39759 7.25207 3
 -7 -4 4 15.1112 8.92994 3
 -7 -4 4 25.2759 6.80788 3
 7 -4 -4 22.6646 7.55139 1
 7 -4 -4 12.2937 7.16382 3
 -7 -4 4 15.0616 4.09169 1
 7 -4 -4 24.353 6.50666 3
 -7 4 4 25.0309 7.34141 3
 -7 4 4 16.9735 7.48253 1
 7 4 -4 12.6662 8.61768 3
 7 4 -4 20.7093 7.1154 3
 -7 4 4 13.6621 6.37292 3
 6 -4 -4 59.2366 7.45457 3
 -6 -4 4 56.8539 5.07241 1
 -6 -4 4 63.4147 7.84378 3
 -6 -4 4 69.6713 10.2148 3
 6 -4 -4 58.1266 8.03021 3
 6 -4 -4 61.6517 7.95091 1
 -6 4 4 63.5451 8.03221 1
 -6 4 4 51.5196 8.39943 3
 6 4 -4 69.4457 8.36526 3
 6 4 -4 71.729 9.9879 3
 -6 4 4 63.2223 7.23472 3
 -5 -4 4 21.5377 6.29079 3
 5 -4 -4 28.3394 6.6167 1
 5 -4 -4 26.5411 6.74748 3
 -5 -4 4 20.9452 8.12852 3
 5 -4 -4 25.645 6.17128 3
 -5 4 4 29.2185 7.09455 3
 -5 4 4 24.7222 5.92591 3
 5 4 -4 30.5651 8.38429 3
 5 4 -4 26.1862 6.97179 3
 -5 4 4 21.5938 6.47963 1
 4 -4 -4 75.5619 10.2948 3
 4 -4 -4 81.9158 9.58367 1
 -4 -4 4 85.964 9.84971 3
 4 -4 -4 70.8801 7.37617 3
 -4 -4 4 64.8959 8.94667 3
 4 4 -4 85.6842 10.4113 3
 -4 4 4 94.3403 8.76279 3
 4 4 -4 87.5199 12.1528 3
 -4 4 4 72.065 9.2794 1
 4 4 -4 85.8932 8.80501 2
 -4 4 4 91.3279 10.9442 3
 3 -4 -4 73.2882 9.08686 1
 -3 -4 4 65.8882 7.27594 3
 3 -4 -4 63.6958 7.61252 3
 -3 -4 4 56.3374 7.12224 3
 3 -4 -4 54.9589 6.71345 3
 -3 4 4 62.1801 8.75646 3
 3 4 -4 68.5864 8.94623 3
 3 4 -4 58.197 7.40493 3
 -3 4 4 67.4926 7.63782 3
 3 4 -4 56.9421 6.17539 2
 2 -4 -4 389.67 14.6588 1
 2 -4 -4 413.74 15.9702 3
 2 -4 -4 427.655 15.2725 3
 -2 -4 4 409.792 15.394 3
 -2 -4 4 440.929 16.2316 3
 2 4 -4 427.999 18.7546 3
 -2 4 4 421.36 16.3805 3
 2 4 -4 414.951 13.988 2
 2 4 -4 421.487 16.7132 3
 -2 4 4 464.06 18.2354 3
 -1 -4 4 46.6194 6.75526 3
 1 -4 -4 58.4427 7.08205 3
 1 -4 -4 46.0538 5.86668 1
 1 -4 -4 57.2522 6.61316 3
 -1 -4 4 59.0151 7.37152 3
 -1 4 4 44.384 6.61588 3
 -1 4 4 55.4685 8.37983 3
 1 4 -4 64.4596 9.06721 3
 1 4 -4 49.288 7.15745 3
 1 4 -4 52.5355 7.24379 2
 0 -4 4 -1.8581 5.7667 3
 0 -4 -4 5.09246 4.50829 1
 0 -4 4 5.93547 5.46875 3
 0 -4 -4 -4.6991 5.04889 3
 0 -4 4 4.19573 4.23899 2
 0 -4 -4 0.3722 5.27791 3
 0 4 -4 4.84926 5.04702 3
 0 4 4 -2.9489 5.24953 3
 0 4 -4 12.3321 6.19445 3
 0 4 4 14.6878 7.39194 3
 0 4 -4 7.9901 3.15001 1
 0 4 -4 4.02421 4.4352 2
 -1 -4 -4 117.761 13.1771 3
 1 -4 4 111.353 10.9022 3
 -1 -4 -4 129.453 10.8947 3
 1 -4 4 106.417 7.89667 2
 1 -4 4 108.071 10.0378 3
 1 4 4 128.224 11.2366 3
 -1 4 -4 110.278 6.81214 1
 -1 4 -4 114.678 9.92897 3
 1 4 4 135.265 13.0631 3
 -1 4 -4 101.099 11.5024 3
 2 -4 4 13.7014 6.23888 3
 -2 -4 -4 6.48043 5.70378 3
 2 -4 4 2.35285 4.57093 2
 -2 -4 -4 18.0585 7.36919 3
 2 -4 4 2.37756 5.56771 3
 -2 4 -4 10.2998 4.42246 1
 -2 4 -4 12.0641 5.74018 3
 2 4 4 23.514 8.0014 3
 -2 4 -4 14.9394 6.47507 3
 2 4 4 4.10817 5.90379 3
 3 -4 4 218.164 10.0546 2
 -3 -4 -4 195.246 12.2564 3
 -3 -4 -4 211.855 15.6549 3
 3 -4 4 196.193 13.0599 3
 3 -4 4 187.361 12.0009 3
 -3 4 -4 196.15 12.0926 3
 3 4 4 189.602 12.7424 3
 -3 4 -4 189.393 13.379 3
 -3 4 -4 178.456 9.94501 1
 3 4 4 191.756 15.3468 3
 -4 -4 -4 117.8 14.6056 3
 4 -4 4 111.485 11.0228 3
 4 -4 4 119.936 8.97452 2
 -4 -4 -4 104.751 11.2682 3
 4 -4 4 121.751 12.5705 3
 4 4 4 118.698 12.3296 3
 -4 4 -4 116.647 12.6313 3
 -4 4 -4 124.69 9.74202 1
 4 4 4 119.078 14.614 3
 -4 4 -4 120.267 11.1294 3
 5 -4 4 -7.3716 5.42507 2
 -5 -4 -4 7.58677 8.73957 3
 5 -4 4 0.84531 6.02526 3
 -5 -4 -4 -1.7813 6.28058 3
 5 -4 4 -4.7194 6.69809 3
 -5 4 -4 10.2688 6.41959 3
 5 4 4 -10.699 8.00283 3
 -5 4 -4 6.56622 5.73842 1
 -5 4 -4 3.1727 7.29386 3
 5 4 4 13.961 6.53008 3
 6 -4 4 31.3835 8.42683 3
 6 -4 4 27.2529 7.4165 3
 -6 -4 -4 32.5582 7.78626 3
 -6 -4 -4 30.8296 9.4578 3
 -6 4 -4 27.0266 8.4547 3
 6 4 4 22.5729 9.43379 3
 -6 4 -4 27.6208 6.8642 1
 -6 4 -4 20.3996 7.23659 3
 6 4 4 20.6661 7.57987 3
 -7 -4 -4 75.8706 11.912 3
 7 -4 4 79.3977 9.5214 3
 -7 -4 -4 86.332 9.99663 3
 7 -4 4 82.0249 10.6091 3
 -7 4 -4 84.7325 12.1399 1
 7 4 4 82.5115 12.6169 3
 -7 4 -4 71.8904 9.19047 3
 7 4 4 75.3232 9.53532 3
 -7 4 -4 74.2368 10.9024 3
 -8 -4 -4 20.2652 8.0864 3
 8 -4 4 22.7773 8.83733 3
 8 -4 4 4.2629 9.19523 3
 -8 -4 -4 21.3417 10.9126 3
 8 4 4 12.2401 10.2844 3
 8 4 4 13.88 8.60842 3
 -8 4 -4 13.7202 8.11657 3
 -8 4 -4 28.9351 10.4054 3
 -8 4 -4 18.8466 8.34417 1
 9 -4 4 127.901 15.1836 3
 9 -4 4 151.896 18.0363 3
 -9 -4 -4 152.312 19.8049 3
 -9 -4 -4 125.7 14.8476 3
 9 4 4 142.475 16.7193 3
 -9 4 -4 106.606 17.9307 3
 -9 4 -4 118.118 14.4612 1
 -9 4 -4 114.309 13.7278 3
 9 4 4 141.804 19.2963 3
 10 -4 4 0.07825 8.86788 3
 -10 -4 -4 6.16447 9.34344 3
 10 -4 4 -4.871 10.4991 3
 -10 -4 -4 20.9663 12.3251 3
 -10 4 -4 11.1716 9.37632 3
 10 4 4 4.4446 12.4855 3
 -10 4 -4 10.7579 11.1522 3
 -10 4 -4 -9.6084 8.20945 1
 10 4 4 -0.659 11.2306 3
 11 -4 4 16.5175 10.6923 3
 11 -4 4 37.5049 12.5583 3
 -11 -4 -4 44.5991 14.1672 3
 -11 -4 -4 23.2764 10.6157 3
 -11 4 -4 22.4457 10.2424 3
 11 4 4 21.9519 12.6542 3
 11 4 4 23.6332 10.8762 3
 -11 4 -4 -11.805 11.795 3
 -11 4 -4 24.1747 10.1904 1
 -12 -4 -4 45.3341 12.2032 3
 -12 -4 -4 45.418 15.3034 3
 12 -4 4 74.4556 14.0687 3
 12 -4 4 51.955 12.5216 3
 -12 4 -4 54.6412 11.7065 3
 12 4 4 50.3815 16.3645 3
 12 4 4 37.3487 11.8028 3
 -12 4 -4 31.528 11.5378 1
 -12 4 -4 66.3865 15.056 3
 -13 -4 -4 18.7863 13.1639 3
 13 -4 4 50.6311 15.6196 3
 13 -4 4 29.2086 13.3205 3
 -13 -4 -4 29.2998 15.7123 3
 -13 4 -4 37.4653 11.905 1
 13 4 4 -8.9272 11.9025 3
 -13 4 -4 23.3397 15.7912 3
 -13 4 -4 20.8603 11.9655 3
 13 4 4 50.7871 16.9187 3
 -14 -4 -4 19.1469 18.0774 3
 -14 -4 -4 1.99922 14.9205 3
 14 -4 4 11.2706 16.0919 3
 14 -4 4 55.4074 14.4729 3
 -14 4 -4 11.6911 17.9862 3
 14 4 4 -4.2674 13.5509 3
 -14 4 -4 -10.805 12.7994 3
 -14 4 -4 3.89261 11.8074 1
 14 4 4 2.40075 18.0067 3
 -14 -5 4 75.6591 19.6913 3
 14 -5 -4 -5.4885 12.9883 3
 -14 -5 4 -17.964 12.6353 3
 14 -5 -4 3.47138 14.1518 3
 -14 -5 4 2.41476 8.12142 1
 14 5 -4 -11.855 13.4442 3
 -14 5 4 7.8253 15.3906 3
 -14 5 4 15.7759 11.8433 3
 14 5 -4 23.5743 16.6055 3
 -14 5 4 50.7892 15.4378 1
 13 -5 -4 86.8005 15.4728 3
 -13 -5 4 104.92 14.47 3
 -13 -5 4 91.5339 10.1035 1
 -13 -5 4 103.881 18.3008 3
 13 -5 -4 87.9301 14.3095 3
 -13 5 4 150.456 21.4503 1
 13 5 -4 84.8462 18.9348 3
 13 5 -4 74.0559 14.7039 3
 -13 5 4 102.858 13.4857 3
 -13 5 4 70.5889 15.4786 3
 -12 -5 4 2.64171 14.727 3
 -12 -5 4 18.1009 9.9291 3
 -12 -5 4 14.195 7.11322 1
 12 -5 -4 25.0642 11.8835 3
 12 -5 -4 -5.8957 9.66617 3
 -12 5 4 19.8538 11.7736 1
 -12 5 4 -10.38 12.3417 3
 -12 5 4 27.0568 11.0772 3
 12 5 -4 15.917 14.7113 3
 12 5 -4 -15.201 10.6023 3
 -11 -5 4 204.646 13.0179 1
 -11 -5 4 206.576 18.0196 3
 11 -5 -4 195.1 17.8873 3
 -11 -5 4 269.519 24.9731 3
 11 -5 -4 217.662 19.4567 3
 -11 5 4 235.179 17.6821 3
 -11 5 4 220.868 19.5286 1
 11 5 -4 228.546 23.9699 3
 -11 5 4 211.708 20.0358 3
 11 5 -4 218.919 19.5506 3
 -10 -5 4 3.11241 8.73238 3
 10 -5 -4 7.89877 8.99287 3
 10 -5 -4 -0.8648 9.5259 3
 -10 -5 4 25.4681 12.7313 3
 -10 -5 4 15.2398 5.77349 1
 -10 5 4 -6.6658 7.85742 3
 10 5 -4 -2.9553 9.3189 3
 -10 5 4 2.97704 9.54888 1
 -10 5 4 3.70279 10.3453 3
 10 5 -4 1.04607 12.0921 3
 -9 -5 4 341.792 12.9949 1
 9 -5 -4 301.911 19.435 3
 9 -5 -4 312.107 17.8244 3
 -9 -5 4 305.349 17.9634 3
 -9 -5 4 274.653 22.8797 3
 9 5 -4 345.2 22.4573 3
 -9 5 4 295.164 17.5293 3
 -9 5 4 359.379 19.9348 3
 9 5 -4 324.089 19.5788 3
 -9 5 4 353.97 20.0927 1
 8 -5 -4 23.9953 8.30145 3
 -8 -5 4 19.8929 8.60189 3
 8 -5 -4 1.05678 8.25062 3
 -8 -5 4 22.58 5.38907 1
 -8 -5 4 5.0139 10.8154 3
 -8 5 4 9.39505 12.3421 1
 -8 5 4 -1.8668 8.8644 3
 8 5 -4 25.0365 10.9861 3
 -8 5 4 20.1399 7.92648 3
 8 5 -4 8.49336 8.51013 3
 7 -5 -4 240.098 16.4215 3
 7 -5 -4 234.083 15.534 3
 7 -5 -4 251.78 16.7604 1
 -7 -5 4 266.028 20.3309 3
 -7 -5 4 214.163 24.0803 3
 -7 5 4 259.938 16.1972 1
 -7 5 4 248.317 16.9673 3
 7 5 -4 278.923 17.148 3
 7 5 -4 247.541 20.5978 3
 -7 5 4 249.35 14.8553 3
 6 -5 -4 57.1676 9.69138 1
 -6 -5 4 49.6022 8.55127 3
 6 -5 -4 57.8701 9.30447 3
 6 -5 -4 52.8599 8.56846 3
 -6 5 4 58.195 8.83963 1
 6 5 -4 72.1643 9.72521 3
 6 5 -4 62.1741 11.4774 3
 -6 5 4 61.9709 8.47704 3
 6 5 -4 55.8328 7.9185 2
 -6 5 4 49.049 9.11224 3
 5 -5 -4 381.71 17.4689 1
 -5 -5 4 405.583 17.8286 3
 5 -5 -4 384.412 16.9675 3
 -5 -5 4 368.557 16.5095 3
 5 -5 -4 408.996 18.051 3
 -5 5 4 401.499 16.9345 1
 5 5 -4 407.516 20.9765 3
 5 5 -4 402.745 18.7708 3
 -5 5 4 382.125 18.5178 3
 5 5 -4 391.619 15.9006 2
 -4 -5 4 119.75 11.9117 3
 4 -5 -4 154.71 12.0409 3
 -4 -5 4 166.284 13.1978 3
 4 -5 -4 134.313 12.7585 3
 4 -5 -4 122.365 11.6772 1
 -4 5 4 167.562 13.9867 3
 4 5 -4 141.259 10.6311 2
 4 5 -4 154.387 13.8678 3
 4 5 -4 160.681 16.1105 3
 -4 5 4 146.24 16.0916 3
 -3 -5 4 406.121 16.8053 3
 -3 -5 4 378.451 17.1824 3
 3 -5 -4 400.655 15.67 1
 3 -5 -4 396.968 16.6299 3
 3 -5 -4 377.273 17.2907 3
 3 5 -4 401.262 17.793 3
 -3 5 4 394.342 19.5152 3
 3 5 -4 381.286 14.509 2
 3 5 -4 419.358 20.5044 3
 -3 5 4 380.748 17.3436 3
 2 -5 -4 622.51 21.1715 3
 2 -5 -4 621.181 20.1318 1
 -2 -5 4 635.701 21.5042 3
 -2 -5 4 642.641 22.2365 3
 2 -5 -4 622.653 21.9608 3
 -2 5 4 636.288 24.4678 3
 -2 5 4 625.272 22.2692 3
 2 5 -4 632.523 19.2371 2
 2 5 -4 640.776 22.5744 3
 2 5 -4 657.167 24.9004 3
 1 -5 -4 106.641 11.7635 3
 -1 -5 4 100.776 12.1598 3
 1 -5 -4 100.062 9.69739 1
 1 -5 -4 113.62 10.7117 3
 -1 -5 4 104.093 11.1118 3
 -1 5 4 97.2868 12.1853 3
 -1 5 4 128.746 15.0302 3
 1 5 -4 116.1 8.98854 2
 1 5 -4 116.449 14.6629 3
 1 5 -4 94.5726 12.3544 3
 0 -5 -4 109.065 9.29523 1
 0 -5 -4 128.289 12.5284 3
 0 -5 -4 116.244 11.0296 3
 0 -5 4 113.475 12.7556 3
 0 -5 4 95.4993 11.2496 3
 0 5 4 102.151 12.2256 3
 0 5 -4 93.5205 10.7734 3
 0 5 -4 130.887 12.6806 3
 0 5 4 114.035 14.7084 3
 0 5 -4 127.598 9.24367 2
 -1 -5 -4 102.487 9.09441 1
 -1 -5 -4 126.912 12.3415 3
 1 -5 4 109.27 8.36541 2
 -1 -5 -4 95.8805 10.845 3
 1 -5 4 104.079 11.4084 3
 1 -5 4 98.6864 12.6342 3
 1 5 4 102.454 12.3006 3
 -1 5 -4 109.873 7.27481 1
 -1 5 -4 107.206 13.2419 3
 -1 5 -4 111.645 10.9323 3
 1 5 4 122.304 14.9907 3
 2 -5 4 0.40324 6.24592 3
 -2 -5 -4 -2.5097 6.11478 3
 2 -5 4 1.19416 4.67868 2
 2 -5 4 -3.4599 6.67905 3
 -2 -5 -4 -0.1695 8.40798 3
 2 5 4 4.72922 7.09091 3
 -2 5 -4 -1.5891 4.54318 1
 -2 5 -4 0.98536 6.9722 3
 -2 5 -4 2.03785 6.4734 3
 2 5 4 -15.406 8.01291 3
 3 -5 4 63.3233 6.63283 2
 3 -5 4 66.0896 8.4019 3
 -3 -5 -4 68.189 8.91895 3
 -3 -5 -4 54.9641 10.7317 3
 3 -5 4 64.2275 9.04877 3
 -3 5 -4 55.9274 9.55824 3
 -3 5 -4 80.2013 11.0458 3
 3 5 4 61.681 10.5459 3
 3 5 4 71.4488 9.51546 3
 -3 5 -4 62.9144 8.58211 1
 4 -5 4 159.809 14.7278 3
 -4 -5 -4 150.334 17.8163 3
 4 -5 4 168.24 13.7166 3
 4 -5 4 172.505 10.6578 2
 -4 -5 -4 171.801 14.3228 3
 -4 5 -4 173.818 11.5133 1
 4 5 4 164.357 14.6292 3
 -4 5 -4 176.775 13.2035 3
 -4 5 -4 175.314 16.0007 3
 4 5 4 176.848 17.9267 3
 5 -5 4 50.1012 7.32907 2
 -5 -5 -4 65.5505 12.2271 3
 -5 -5 -4 45.222 8.8368 3
 5 -5 4 51.2579 9.69339 3
 5 -5 4 50.3321 8.97275 3
 5 5 4 63.0113 9.76431 3
 5 5 4 61.9713 11.6589 3
 -5 5 -4 61.3421 8.69346 3
 -5 5 -4 49.4145 10.2111 3
 -5 5 -4 62.8663 8.14434 1
 6 -5 4 78.0376 9.72282 3
 -6 -5 -4 72.402 12.1943 3
 6 -5 4 93.56 11.6171 3
 6 -5 4 78.8655 10.7052 2
 -6 -5 -4 84.0767 10.7185 3
 -6 5 -4 88.7891 10.0074 3
 -6 5 -4 80.696 11.2751 3
 6 5 4 78.1034 10.9372 3
 -6 5 -4 92.9709 12.3997 1
 6 5 4 82.0552 13.0232 3
 7 -5 4 20.5448 10.312 3
 -7 -5 -4 27.4169 9.33265 3
 7 -5 4 26.0361 8.1129 2
 -7 -5 -4 20.0448 11.3963 3
 7 -5 4 25.9799 8.77936 3
 -7 5 -4 25.3693 9.90379 3
 7 5 4 31.8809 12.5145 3
 7 5 4 24.6583 9.38899 3
 -7 5 -4 21.5764 8.48512 3
 -7 5 -4 26.1902 8.49454 1
 8 -5 4 11.4252 9.29136 3
 8 -5 4 5.91929 9.59436 3
 -8 -5 -4 2.54464 11.6941 3
 -8 -5 -4 1.80598 10.1013 3
 8 5 4 11.9349 9.42853 3
 -8 5 -4 18.8173 12.0754 1
 -8 5 -4 16.5866 9.00775 3
 -8 5 -4 12.9372 10.745 3
 8 5 4 16.1279 13.1092 3
 9 -5 4 13.8082 9.80794 3
 -9 -5 -4 0.1916 12.5094 3
 -9 -5 -4 -2.6254 9.53083 3
 9 -5 4 -0.3755 10.6724 3
 -9 5 -4 -3.3814 11.0132 3
 9 5 4 18.0764 10.5509 3
 9 5 4 -2.821 13.5363 3
 -9 5 -4 2.30194 8.6882 1
 -9 5 -4 13.4429 9.28533 3
 10 -5 4 113.505 13.3179 3
 10 -5 4 122.991 14.8414 3
 -10 -5 -4 114.397 18.0987 3
 -10 -5 -4 147.502 17.7805 3
 10 5 4 151.99 19.8255 3
 -10 5 -4 129.173 16.3846 3
 -10 5 -4 135.161 18.323 3
 -10 5 -4 136.661 17.1354 1
 10 5 4 179.066 23.928 3
 11 -5 4 14.5619 12.3932 3
 11 -5 4 -1.4324 10.9433 3
 -11 -5 -4 -0.1471 10.5029 3
 -11 -5 -4 -0.0625 15.0517 3
 -11 5 -4 12.14 10.8005 3
 -11 5 -4 -1.3052 12.7797 3
 -11 5 -4 -4.9426 9.50794 1
 11 5 4 -8.2797 14.1579 3
 11 5 4 -0.5959 12.0993 3
 12 -5 4 70.4998 16.0975 3
 -12 -5 -4 78.863 18.4983 3
 12 -5 4 82.7433 14.9054 3
 -12 -5 -4 86.7591 14.4773 3
 -12 5 -4 102.781 17.7154 3
 -12 5 -4 90.7865 14.8234 3
 12 5 4 98.1703 16.0377 3
 12 5 4 86.2217 17.0372 3
 -12 5 -4 80.5742 13.8184 1
 13 -5 4 17.6978 16.0025 3
 -13 -5 -4 12.7694 18.615 3
 13 -5 4 -8.1172 13.8177 3
 -13 -5 -4 -3.4792 13.4423 3
 -13 5 -4 22.869 13.1777 3
 13 5 4 12.3225 17.8924 3
 -13 5 -4 -4.8937 16.9319 3
 -13 5 -4 1.45835 12.8194 1
 13 5 4 21.7343 13.4865 3
 -13 -6 4 36.5623 14.8247 3
 -13 -6 4 -2.3969 7.77879 1
 13 -6 -4 -26.867 13.5005 3
 -13 -6 4 4.45009 18.1133 3
 13 -6 -4 0.96514 15.3405 3
 13 6 -4 48.3856 19.4528 3
 13 6 -4 -36.606 14.9882 3
 -13 6 4 9.20881 15.3602 1
 -13 6 4 -6.0445 14.8384 3
 12 -6 -4 6.88122 13.0442 3
 -12 -6 4 -16.632 11.816 3
 -12 -6 4 16.4595 6.89586 1
 12 -6 -4 31.2246 12.9305 3
 -12 -6 4 14.6648 18.3852 3
 -12 6 4 27.2376 13.5642 1
 -12 6 4 25.5024 15.9458 3
 12 6 -4 -4.3764 12.869 3
 12 6 -4 21.2584 17.6002 3
 -12 6 4 -19.175 11.8907 3
 -11 -6 4 -9.139 10.791 3
 11 -6 -4 40.4472 12.9157 3
 11 -6 -4 2.61853 10.7973 3
 -11 -6 4 7.24547 5.53495 1
 -11 -6 4 -8.1943 16.2101 3
 -11 6 4 16.0837 10.8926 3
 11 6 -4 -14.482 15.6928 3
 -11 6 4 22.3245 11.7787 1
 11 6 -4 8.02991 11.3454 3
 -11 6 4 -2.1871 12.9369 3
 -10 -6 4 55.779 12.7812 3
 10 -6 -4 61.2158 12.4402 3
 -10 -6 4 82.2179 17.4313 3
 -10 -6 4 59.1927 7.79023 1
 10 -6 -4 39.7051 11.3617 3
 10 6 -4 71.9714 13.0518 3
 -10 6 4 46.2735 12.6983 3
 10 6 -4 51.9247 15.373 3
 -10 6 4 43.9977 11.7585 3
 -10 6 4 55.1689 12.5506 1
 9 -6 -4 15.3617 10.9149 3
 9 -6 -4 13.6583 9.85606 3
 -9 -6 4 16.8337 13.712 3
 -9 -6 4 -1.8273 9.65339 3
 9 6 -4 9.48499 10.9615 3
 -9 6 4 7.369 11.2831 3
 -9 6 4 1.30276 10.5514 1
 9 6 -4 -17.733 13.3447 3
 -9 6 4 17.6149 9.45922 3
 8 -6 -4 -2.608 9.68112 3
 -8 -6 4 -4.6287 9.5424 3
 8 -6 -4 0.08815 9.11642 3
 -8 6 4 -7.2195 9.17285 1
 8 6 -4 -3.2168 9.96852 3
 -8 6 4 -9.12 8.27027 3
 -8 6 4 -2.5463 10.6519 3
 8 6 -4 8.59118 8.72207 2
 8 6 -4 4.33681 12.996 3
 -7 -6 4 63.2553 11.1358 3
 7 -6 -4 70.8689 11.5813 3
 7 -6 -4 43.8689 11.0955 1
 7 -6 -4 64.2732 10.6996 3
 -7 -6 4 52.8702 10.1138 3
 7 6 -4 67.9271 10.1088 2
 7 6 -4 66.1651 11.3733 3
 -7 6 4 63.1333 10.9839 1
 -7 6 4 104.884 14.2175 3
 -7 6 4 47.6386 11.8428 3
 7 6 -4 66.8213 14.7586 3
 6 -6 -4 38.0898 10.1547 1
 6 -6 -4 15.5889 9.3631 3
 -6 -6 4 24.9501 9.0153 3
 -6 -6 4 36.0628 9.48701 3
 6 -6 -4 31.6779 9.52485 3
 6 6 -4 20.955 9.58878 3
 6 6 -4 29.6388 8.50533 2
 -6 6 4 35.9121 10.1444 3
 6 6 -4 21.5158 12.616 3
 -6 6 4 25.0132 9.12952 1
 5 -6 -4 -3.0408 10.0251 3
 -5 -6 4 -12.099 7.90734 3
 -5 -6 4 4.90013 8.89057 3
 5 -6 -4 -2.9578 8.49719 1
 5 -6 -4 20.9527 9.79705 3
 -5 6 4 1.85691 10.9362 3
 5 6 -4 16.042 8.86682 3
 5 6 -4 8.80577 7.38755 2
 -5 6 4 -0.2207 9.18184 3
 5 6 -4 12.179 11.8693 3
 -4 -6 4 29.9824 8.69677 3
 4 -6 -4 12.1666 8.3826 3
 4 -6 -4 13.8111 8.36374 1
 -4 -6 4 11.558 8.39765 3
 4 -6 -4 5.01838 8.64468 3
 4 6 -4 10.4621 9.0969 3
 -4 6 4 11.6099 9.52155 3
 4 6 -4 14.4488 6.88524 2
 -4 6 4 11.2265 10.8245 3
 4 6 -4 9.42095 10.6308 3
 3 -6 -4 -1.083 8.22885 3
 -3 -6 4 10.0798 7.72415 3
 -3 -6 4 4.65475 7.7053 3
 3 -6 -4 3.3345 7.55084 3
 3 -6 -4 -9.4124 6.71672 1
 -3 6 4 16.4241 8.67426 3
 3 6 -4 0.63853 10.8995 3
 3 6 -4 3.85343 6.29355 2
 3 6 -4 13.4681 8.62615 3
 -3 6 4 -22.19 9.56061 3
 2 -6 -4 33.8983 8.83687 3
 2 -6 -4 25.8167 8.97614 3
 2 -6 -4 18.9704 7.11475 1
 -2 -6 4 11.1139 7.99973 3
 -2 -6 4 28.7616 8.61617 3
 2 6 -4 25.8407 8.95051 3
 -2 6 4 26.1374 9.31536 3
 -2 6 4 6.95656 10.6211 3
 2 6 -4 23.5864 11.3672 3
 2 6 -4 30.9647 6.61625 2
 -1 -6 4 17.7065 8.22524 3
 1 -6 -4 16.431 6.94925 1
 -1 -6 4 21.3329 8.70942 3
 1 -6 -4 21.1281 8.10332 3
 1 -6 -4 19.3056 8.21937 3
 -1 6 4 32.9534 9.44038 3
 -1 6 4 11.5404 10.1823 3
 1 6 -4 17.4186 6.21611 2
 1 6 -4 27.0174 11.2687 3
 1 6 -4 13.8244 8.97619 3
 0 -6 4 2.51416 8.06367 3
 0 -6 4 -2.999 7.65618 3
 0 -6 -4 3.20169 7.60045 3
 0 -6 -4 -3.2843 7.72504 3
 0 -6 -4 -0.5049 5.91877 1
 0 6 -4 -4.8369 8.79236 3
 0 6 4 -9.5836 9.7304 3
 0 6 4 2.00769 7.96176 3
 0 6 -4 -1.1057 5.72799 2
 0 6 -4 9.35295 10.7047 3
 -1 -6 -4 64.6374 9.25787 3
 1 -6 4 71.1355 10.2959 3
 -1 -6 -4 64.04 7.45039 1
 -1 -6 -4 67.6778 10.1067 3
 1 -6 4 73.094 9.81014 3
 1 6 4 86.611 12.231 3
 1 6 4 55.3237 10.1539 3
 -1 6 -4 61.9337 11.7376 3
 -1 6 -4 50.331 10.6687 3
 -2 -6 -4 316.003 17.3652 3
 -2 -6 -4 321.453 13.4759 1
 2 -6 4 313.85 13.1748 2
 -2 -6 -4 340.517 18.4831 3
 2 -6 4 303.438 17.5952 3
 2 -6 4 299.283 18.7766 3
 2 6 4 310.164 21.4047 3
 -2 6 -4 320.614 19.347 3
 -2 6 -4 324.867 12.8765 1
 2 6 4 309.089 18.6422 3
 3 -6 4 15.6907 8.4018 3
 -3 -6 -4 23.2544 9.17425 3
 3 -6 4 27.5131 9.66993 3
 3 -6 4 30.7334 6.3268 2
 -3 -6 -4 26.061 6.54946 1
 3 6 4 24.679 11.7139 3
 3 6 4 15.4137 9.6035 3
 -3 6 -4 28.2365 8.97383 3
 -3 6 -4 -0.9143 9.45318 3
 3 6 4 26.4574 5.44361 2
 -3 6 -4 20.5707 6.24843 1
 -4 -6 -4 217.529 21.398 3
 -4 -6 -4 207.192 17.2414 3
 4 -6 4 214.829 16.9752 3
 4 -6 4 222.916 18.133 3
 4 -6 4 248.149 12.424 2
 4 6 4 226.086 18.3498 3
 4 6 4 223.194 21.9594 3
 -4 6 -4 222.196 16.3667 3
 -4 6 -4 218.414 13.1379 1
 -4 6 -4 239.295 18.6774 3
 -5 -6 -4 11.6451 8.89996 3
 5 -6 4 30.0818 10.4576 3
 5 -6 4 25.9548 7.04038 2
 5 -6 4 20.1668 9.95258 3
 -5 -6 -4 16.2634 11.4146 3
 5 6 4 15.8759 12.4535 3
 -5 6 -4 11.3348 10.677 3
 -5 6 -4 23.1868 7.79691 1
 -5 6 -4 29.3975 9.45168 3
 5 6 4 17.857 9.97263 3
 6 -6 4 13.9228 7.31784 2
 -6 -6 -4 -2.8026 10.6366 3
 6 -6 4 10.0683 9.41194 3
 6 -6 4 21.1496 10.3154 3
 -6 -6 -4 10.5294 9.80498 3
 6 6 4 8.10879 10.5037 3
 6 6 4 20.1142 12.6862 3
 -6 6 -4 7.2743 10.6002 3
 -6 6 -4 10.0638 7.95273 1
 -6 6 -4 3.81825 9.93533 3
 7 -6 4 -2.387 9.53466 3
 -7 -6 -4 0.46291 9.69564 3
 7 -6 4 4.91102 8.15969 2
 -7 -6 -4 -0.8026 12.4093 3
 7 -6 4 3.67977 10.899 3
 -7 6 -4 10.212 9.96039 3
 7 6 4 20.804 12.653 3
 7 6 4 15.8483 11.0031 3
 -7 6 -4 -2.9505 8.62589 1
 -7 6 -4 5.8639 10.9674 3
 8 -6 4 34.0656 12.0227 3
 -8 -6 -4 38.3838 10.8112 3
 8 -6 4 39.2842 9.18174 2
 8 -6 4 35.4636 11.5753 3
 -8 -6 -4 23.8505 14.2821 3
 -8 6 -4 34.307 10.9122 1
 8 6 4 32.174 11.4797 3
 8 6 4 17.5631 13.2908 3
 -8 6 -4 45.9444 12.9278 3
 -8 6 -4 41.5021 11.0354 3
 9 -6 4 0.1426 10.958 3
 9 -6 4 12.2822 9.17398 2
 -9 -6 -4 11.7311 11.2133 3
 9 -6 4 13.5532 12.1942 3
 -9 -6 -4 11.8554 14.8882 3
 9 6 4 19.266 15.9524 3
 -9 6 -4 2.59987 12.6776 3
 9 6 4 5.22538 11.4052 3
 -9 6 -4 8.40712 10.6583 1
 -9 6 -4 0.26944 10.5443 3
 10 -6 4 42.9095 14.0601 3
 10 -6 4 14.7421 12.4178 3
 -10 -6 -4 4.90425 12.0797 3
 10 -6 4 5.0947 11.3391 2
 -10 -6 -4 35.1515 17.5869 3
 10 6 4 16.5906 16.7556 3
 10 6 4 16.0287 13.0002 3
 -10 6 -4 -21.279 13.5317 3
 -10 6 -4 -2.2972 11.4962 1
 -10 6 -4 -5.3935 11.4149 3
 -11 -6 -4 19.888 17.5697 3
 -11 -6 -4 32.0921 12.8972 3
 11 -6 4 0.68496 12.6642 3
 11 -6 4 3.26872 16.004 3
 -11 6 -4 4.5608 15.5207 3
 -11 6 -4 22.0368 13.1101 1
 11 6 4 34.1097 14.5873 3
 11 6 4 63.4948 18.5891 3
 -11 6 -4 -18.342 12.9464 3
 12 -6 4 2.63269 16.7365 3
 -12 -6 -4 9.68134 14.4963 3
 -12 -6 -4 -21.287 20.5109 3
 12 -6 4 -13.95 14.0339 3
 12 6 4 -56.678 33.3415 3
 12 6 4 6.56359 15.7831 3
 -12 6 -4 -13.442 13.6126 1
 -12 6 -4 -0.4711 13.9646 3
 -12 6 -4 5.86593 17.1156 3
 -11 -7 4 -11.851 13.2902 3
 11 -7 -4 24.1779 13.4429 3
 11 -7 -4 2.73414 14.4937 3
 -11 7 4 0.09032 14.1005 1
 11 7 -4 -5.9769 14.9276 3
 11 7 -4 4.64727 18.0907 3
 11 7 -4 0.94323 13.3868 2
 -11 7 4 8.85058 15.9076 3
 -11 7 4 -0.0138 12.6944 3
 10 -7 -4 -9.1733 11.9805 3
 -10 -7 4 5.79906 12.2023 3
 10 -7 -4 17.8264 14.0028 3
 -10 7 4 22.0498 12.0096 3
 10 7 -4 -20.41 13.4177 3
 -10 7 4 -15.167 12.6907 1
 -10 7 4 24.8947 14.9661 3
 10 7 -4 14.8617 11.771 2
 10 7 -4 5.7499 17.3665 3
 -9 -7 4 5.44372 11.6583 3
 -9 -7 4 1.24798 11.344 3
 9 -7 -4 -1.19 10.8428 3
 9 -7 -4 13.6321 12.4455 3
 9 7 -4 6.49681 15.7241 3
 9 7 -4 -10.299 12.2105 3
 -9 7 4 -3.539 11.784 1
 -9 7 4 8.59257 13.0748 3
 9 7 -4 34.7283 12.1452 2
 -8 -7 4 15.1027 11.4097 3
 -8 -7 4 -0.2033 10.7016 3
 8 -7 -4 15.4995 11.2313 3
 8 -7 -4 2.39077 11.9919 3
 8 7 -4 0.35474 12.011 3
 8 7 -4 8.13189 9.68107 2
 -8 7 4 17.156 11.3267 1
 -8 7 4 1.94634 12.0208 3
 8 7 -4 15.6224 16.048 3
 7 -7 -4 57.7896 12.5839 3
 7 -7 -4 55.4446 13.2274 3
 -7 -7 4 51.926 12.3847 3
 -7 -7 4 42.188 11.9444 3
 7 7 -4 57.2989 10.767 2
 7 7 -4 48.0772 16.6625 3
 -7 7 4 35.0068 13.5028 3
 7 7 -4 55.3878 12.7303 3
 -7 7 4 47.815 15.2486 3
 6 -7 -4 39.8285 11.0541 1
 -6 -7 4 25.203 10.6949 3
 -6 -7 4 20.0089 10.8703 3
 6 -7 -4 29.1997 12.2478 3
 6 -7 -4 25.8309 10.8346 3
 -6 7 4 23.5269 12.1922 3
 6 7 -4 6.72357 11.5272 3
 6 7 -4 28.7137 8.7092 2
 6 7 -4 26.7965 15.3311 3
 -6 7 4 23.0077 14.25 3
 5 -7 -4 10.2322 12.1238 1
 -5 -7 4 21.2845 10.4722 3
 5 -7 -4 6.23708 10.1618 3
 5 -7 -4 30.7499 10.8512 3
 -5 -7 4 18.4801 10.7252 3
 5 7 -4 17.8194 8.70376 2
 -5 7 4 4.74773 11.0714 3
 -5 7 4 17.4103 13.1194 3
 5 7 -4 18.9895 11.1508 3
 5 7 -4 -1.614 14.1965 3
 4 -7 -4 6.83801 10.2818 3
 4 -7 -4 22.8103 9.49381 1
 4 -7 -4 23.2238 10.3441 3
 -4 -7 4 16.7716 9.66942 3
 -4 -7 4 22.5362 10.7861 3
 4 7 -4 30.4975 13.6883 3
 4 7 -4 28.0911 8.21139 2
 -4 7 4 19.0545 11.5816 3
 -4 7 4 -10.412 13.1234 3
 4 7 -4 18.7398 11.155 3
 -3 -7 4 81.2524 12.8836 3
 3 -7 -4 93.0369 12.2565 3
 3 -7 -4 89.0141 12.2504 3
 3 -7 -4 86.1065 10.458 1
 -3 -7 4 65.2092 11.5005 3
 -3 7 4 101.999 13.3353 3
 -3 7 4 57.6114 14.4432 3
 3 7 -4 91.581 9.23001 2
 3 7 -4 84.0591 13.0776 3
 3 7 -4 70.4271 15.3987 3
 2 -7 -4 -9.9118 7.66235 1
 -2 -7 4 -10.207 8.79522 3
 2 -7 -4 17.7916 9.49313 3
 2 -7 -4 25.0459 10.2231 3
 -2 -7 4 6.32546 9.19328 3
 2 7 -4 10.1395 12.0724 3
 2 7 -4 7.09065 6.92263 2
 -2 7 4 11.5634 12.3602 3
 -2 7 4 3.32362 10.2975 3
 2 7 -4 9.41486 12.4958 3
 -1 -7 4 65.2201 10.9604 3
 1 -7 -4 47.1939 10.8256 3
 1 -7 -4 60.2783 8.89171 1
 1 -7 -4 61.0033 11.5779 3
 -1 -7 4 48.2765 17.8804 3
 1 7 -4 62.7584 8.40755 2
 1 7 -4 45.2986 14.7641 3
 -1 7 4 44.535 11.1097 3
 -1 7 4 57.5739 13.7499 3
 1 7 -4 52.7365 11.9261 3
 0 -7 -4 -0.6168 7.15473 1
 0 -7 4 -3.4707 8.91091 3
 0 -7 -4 8.56127 10.1297 3
 0 -7 -4 5.54087 14.161 3
 0 -7 4 -5.7294 9.12478 3
 0 7 -4 -9.57 12.517 3
 0 7 4 -4.3158 9.84017 3
 0 7 -4 5.86871 10.2545 3
 0 7 4 22.1288 12.9307 3
 -1 -7 -4 12.7224 7.11939 1
 -1 -7 -4 14.5843 9.519 3
 1 -7 4 18.7919 10.3118 3
 -1 -7 -4 10.0856 9.64253 3
 1 -7 4 14.7135 9.28542 3
 1 7 4 -10.714 11.8359 3
 -1 7 -4 5.56464 10.2376 3
 -1 7 -4 14.9101 12.7908 3
 1 7 4 13.4344 10.5135 3
 -2 -7 -4 29.8777 9.8816 3
 2 -7 4 26.8513 10.4475 3
 -2 -7 -4 32.1394 7.62997 1
 2 -7 4 22.0976 11.0702 3
 -2 -7 -4 34.7236 10.8996 3
 -2 7 -4 37.364 11.7989 3
 -2 7 -4 35.9529 13.7685 3
 2 7 4 13.7422 10.7265 3
 2 7 4 26.5104 15.1903 3
 3 -7 4 16.3686 9.87556 3
 -3 -7 -4 35.1854 10.3781 3
 -3 -7 -4 25.007 9.90591 3
 -3 -7 -4 22.4045 7.16352 1
 3 -7 4 27.7916 11.4414 3
 3 7 4 19.5401 11.1003 3
 3 7 4 12.7267 21.0331 3
 -3 7 -4 32.1451 11.4406 3
 -3 7 -4 42.0274 18.4007 3
 -3 7 -4 31.6593 7.3738 1
 -4 -7 -4 43.4168 11.2745 3
 -4 -7 -4 53.3175 11.481 3
 4 -7 4 38.572 7.26991 2
 4 -7 4 45.2794 12.6594 3
 4 -7 4 53.6307 12.0172 3
 -4 -7 -4 52.6086 7.92758 1
 -4 7 -4 38.9252 11.8899 3
 4 7 4 32.5595 30.7454 3
 -4 7 -4 55.4116 11.3318 3
 4 7 4 29.9069 11.346 3
 -4 7 -4 46.8013 8.34174 1
 4 7 4 43.8396 6.82118 2
 5 -7 4 11.8599 6.8029 2
 -5 -7 -4 7.83626 6.7333 1
 5 -7 4 8.81172 10.8549 3
 5 -7 4 8.94784 11.724 3
 -5 -7 -4 -0.9732 9.23333 3
 5 7 4 -5.7201 23.3804 3
 -5 7 -4 -7.8611 8.00297 1
 5 7 4 -6.3253 11.1794 3
 -5 7 -4 0.55081 11.3444 3
 -5 7 -4 17.8834 10.6141 3
 5 7 4 11.2449 6.8482 2
 6 -7 4 98.6212 14.7318 3
 -6 -7 -4 108.977 18.9866 3
 -6 -7 -4 95.5647 13.4853 3
 6 -7 4 110.594 12.6597 2
 6 -7 4 86.5366 13.8727 3
 6 7 4 121.927 25.4466 3
 -6 7 -4 76.7978 14.4671 3
 6 7 4 83.0068 14.6385 3
 -6 7 -4 104.759 14.8389 1
 -6 7 -4 101.604 14.0885 3
 -7 -7 -4 27.8437 17.1132 3
 7 -7 4 -15.938 10.7548 3
 7 -7 4 -21.459 11.6236 3
 -7 -7 -4 -6.0269 11.19 3
 7 -7 4 12.4169 8.36975 2
 -7 7 -4 5.54515 11.3426 3
 -7 7 -4 3.78011 9.84417 1
 7 7 4 -27.917 12.0591 3
 -7 7 -4 5.31288 12.8399 3
 7 7 4 5.32329 16.5165 3
 8 -7 4 55.2433 13.401 3
 8 -7 4 64.5799 10.0898 2
 -8 -7 -4 58.7971 14.0914 3
 8 -7 4 39.915 13.7197 3
 -8 -7 -4 33.1248 16.5748 3
 -8 7 -4 69.1802 13.9944 3
 -8 7 -4 45.8068 15.3214 3
 -8 7 -4 51.972 11.84 1
 8 7 4 40.4368 13.7192 3
 8 7 4 57.0126 18.1219 3
 9 -7 4 61.5406 16.0719 3
 -9 -7 -4 -7.6381 11.7951 3
 9 -7 4 19.2401 10.3014 2
 9 -7 4 22.7102 14.3692 3
 -9 -7 -4 20.3691 19.6739 3
 -9 7 -4 37.901 13.0036 1
 -9 7 -4 -9.8861 14.7934 3
 -9 7 -4 26.6641 14.1147 3
 9 7 4 7.21152 14.7774 3
 9 7 4 23.0496 19.1009 3
 10 -7 4 40.847 17.7448 3
 -10 -7 -4 48.6721 15.5045 3
 10 -7 4 47.2015 14.8212 3
 -10 -7 -4 20.4827 31.0875 3
 -10 7 -4 60.0768 14.6409 3
 -10 7 -4 57.7495 13.4674 1
 -10 7 -4 42.9096 17.972 3
 10 7 4 49.9157 17.5574 3
 10 7 4 60.5939 22.0449 3
 8 -8 -4 15.3338 14.0793 3
 -8 -8 4 -12.498 13.9977 3
 -8 -8 4 -3.1817 13.9888 3
 8 -8 -4 14.1665 14.5669 3
 -8 8 4 26.5756 19.5651 3
 -8 8 4 10.7898 16.0635 3
 8 8 -4 25.6109 19.4326 3
 8 8 -4 5.7579 14.1171 3
 8 8 -4 42.0213 12.2106 2
 -7 -8 4 -5.5015 13.4631 3
 7 -8 -4 5.63636 13.762 3
 7 -8 -4 6.48127 14.2812 3
 -7 -8 4 2.57096 13.2417 3
 -7 8 4 -6.2254 15.2142 3
 7 8 -4 7.37042 13.0898 3
 7 8 -4 1.12964 19.6197 3
 -7 8 4 -6.6235 15.8287 3
 7 8 -4 12.1743 10.6499 2
 -6 -8 4 25.3793 12.3556 3
 -6 -8 4 28.2804 13.5852 3
 6 -8 -4 43.866 14.9136 3
 6 -8 -4 23.9533 13.9791 3
 6 8 -4 25.9461 13.6605 3
 -6 8 4 11.5357 17.0466 3
 6 8 -4 24.1326 17.5808 3
 -6 8 4 40.4169 14.3319 3
 6 8 -4 21.4217 10.2274 2
 -5 -8 4 21.3085 12.9824 3
 5 -8 -4 4.44624 11.6845 3
 5 -8 -4 35.4218 14.163 3
 -5 -8 4 14.9358 12.7434 3
 -5 8 4 39.8105 16.6768 3
 5 8 -4 5.75094 13.3495 3
 5 8 -4 13.9996 9.57764 2
 -5 8 4 4.65006 14.4122 3
 5 8 -4 55.6482 18.5726 3
 -4 -8 4 105.356 15.6087 3
 4 -8 -4 108.63 15.1422 3
 4 -8 -4 107.771 13.4607 1
 -4 -8 4 92.8152 15.2449 3
 4 -8 -4 103.555 14.3161 3
 4 8 -4 124.729 16.0171 2
 -4 8 4 72.8489 18.5866 3
 4 8 -4 112.715 16.52 3
 4 8 -4 126.773 19.685 3
 -4 8 4 109.655 15.6708 3
 3 -8 -4 12.4092 11.4639 3
 3 -8 -4 14.1348 12.4379 1
 -3 -8 4 12.4643 11.2847 3
 -3 -8 4 11.0988 11.6751 3
 3 -8 -4 7.89675 11.6445 3
 3 8 -4 4.02165 12.6234 3
 -3 8 4 14.3143 15.3031 3
 3 8 -4 16.2831 8.72939 2
 -3 8 4 7.28457 12.9871 3
 3 8 -4 2.4737 15.2142 3
 -2 -8 4 94.7527 15.1715 3
 2 -8 -4 100.37 11.7125 1
 -2 -8 4 90.0615 14.3457 3
 2 -8 -4 78.4576 13.7872 3
 2 -8 -4 73.5879 13.4701 3
 2 8 -4 89.8254 18.3446 3
 2 8 -4 90.8811 14.9637 3
 -2 8 4 87.6992 14.8672 3
 2 8 -4 94.3593 10.4206 2
 -2 8 4 56.1801 16.66 3
 1 -8 -4 -12.597 11.2243 3
 1 -8 -4 -19.441 8.99765 1
 1 -8 -4 12.9485 11.279 3
 -1 -8 4 -18.512 11.4594 3
 -1 -8 4 -8.9708 11.019 3
 1 8 -4 24.7501 25.9342 3
 -1 8 4 2.8869 12.7257 3
 1 8 -4 27.8348 13.1407 3
 -1 8 4 -1.4975 14.7609 3
 0 -8 -4 37.0286 11.3732 3
 0 -8 -4 19.1392 9.08972 1
 0 -8 4 32.7211 12.2713 3
 0 -8 -4 11.8629 12.5982 3
 0 -8 4 24.8097 12.7904 3
 0 8 -4 -26.471 15.2748 3
 0 8 -4 22.0369 13.3262 3
 0 8 4 21.8159 12.2968 3
 0 8 4 24.0305 15.5567 3
 1 -8 4 13.0608 12.7199 3
 1 -8 4 12.4223 16.2185 3
 -1 -8 -4 10.4367 7.91786 1
 -1 -8 -4 -9.5244 12.203 3
 -1 -8 -4 11.2288 11.8922 3
 1 8 4 5.46848 12.9769 3
 -1 8 -4 -22.832 14.6859 3
 -1 8 -4 4.97246 13.1262 3
 1 8 4 -7.8798 15.8893 3
 -2 -8 -4 9.63693 7.94699 1
 -2 -8 -4 18.1336 11.6937 3
 2 -8 4 20.3065 13.2386 3
 -2 -8 -4 34.1482 21.0244 3
 2 -8 4 15.1863 11.4193 3
 2 8 4 12.5133 15.5505 3
 -2 8 -4 16.7185 13.2782 3
 2 8 4 16.743 13.2831 3
 -2 8 -4 12.4549 15.7205 3
 3 -8 4 17.4682 13.5723 3
 -3 -8 -4 25.1047 12.09 3
 -3 -8 -4 28.0769 12.6671 3
 -3 -8 -4 28.1649 8.26549 1
 3 -8 4 15.418 12.4837 3
 -3 8 -4 51.6799 17.9664 3
 3 8 4 20.3201 17.8119 3
 -3 8 -4 27.7506 15.4459 3
 -4 -8 -4 2.19209 7.58569 1
 4 -8 4 16.2791 13.1923 3
 4 -8 4 11.6006 13.2273 3
 -4 -8 -4 13.8377 12.1691 3
 -4 -8 -4 -11.244 11.4937 3
 -4 8 -4 17.2855 15.3134 3
 -4 8 -4 13.5711 17.3668 3
 4 8 4 -7.3638 12.9255 3
 4 8 4 -20.518 17.5297 3
 -5 -8 -4 63.5624 14.1077 3
 5 -8 4 58.1842 15.016 3
 -5 -8 -4 54.3969 9.09117 1
 -5 -8 -4 51.5876 13.3475 3
 5 -8 4 53.17 15.6933 3
 -5 8 -4 10.7026 17.1319 3
 -5 8 -4 56.3524 19.3635 3
 5 8 4 71.6304 8.53179 2
 5 8 4 57.252 15.8947 3
 5 8 4 17.3212 18.1378 3
 -5 8 -4 52.3291 10.7623 1
 -6 -8 -4 0.88085 14.0072 3
 6 -8 4 41.2817 15.6712 3
 6 -8 4 16.7822 8.35995 2
 -6 -8 -4 22.2082 8.34522 1
 -6 -8 -4 35.7477 13.304 3
 6 -8 4 17.149 13.6443 3
 6 8 4 78.1207 19.049 3
 -6 8 -4 -17.791 22.0372 3
 -6 8 -4 19.9239 10.4404 1
 6 8 4 17.0395 8.81367 2
 6 8 4 23.1196 14.4774 3
 7 -8 4 40.6238 9.242 2
 7 -8 4 -1.405 14.3833 3
 7 -8 4 38.8189 15.3359 3
 -7 -8 -4 36.5931 9.26437 1
 -7 -8 -4 -6.784 14.4582 3
 -7 8 -4 40.9964 12.0378 1
 -7 8 -4 36.1727 19.491 3
 7 8 4 46.7299 10.0932 2
 -7 8 -4 61.5158 15.3727 3
 7 8 4 66.0988 17.3372 3
 3 -9 -4 -7.2241 17.9063 3
 -3 -9 4 0.27539 14.6321 3
 -3 -9 4 23.1808 15.0174 3
 3 9 -4 11.2552 19.5154 3
 -3 9 4 22.5641 17.8207 3
 -3 9 4 -15.095 19.4023 3
 3 9 -4 2.42675 11.2039 2
 3 9 -4 3.39478 15.4946 3
 2 -9 -4 58.8215 15.0727 3
 -2 -9 4 -4.9867 13.7459 3
 2 -9 -4 11.3619 17.4871 3
 -2 -9 4 2.91463 14.9939 3
 2 -9 -4 54.2641 13.1454 1
 -2 9 4 50.6308 17.3071 3
 2 9 -4 -16.349 19.2267 3
 2 9 -4 31.0219 17.072 3
 -2 9 4 16.4704 19.5998 3
 -1 -9 4 27.3199 15.1763 3
 1 -9 -4 7.51688 15.6027 3
 1 -9 -4 19.9957 11.9064 1
 1 -9 -4 4.42943 13.9926 3
 -1 -9 4 25.1154 15.6709 3
 -1 9 4 33.0849 18.9303 3
 -1 9 4 29.8928 19.3583 3
 1 9 -4 38.8046 17.0601 3
 1 9 -4 24.0652 20.0511 3
 0 -9 -4 -11.185 14.8727 3
 0 -9 4 -2.696 14.2732 3
 0 -9 -4 9.08489 11.1608 1
 0 -9 -4 -8.0049 14.5912 3
 0 -9 4 19.439 15.3536 3
 0 9 -4 1.40385 16.2307 3
 0 9 4 32.894 21.0304 3
 0 9 -4 12.5624 19.2812 3
 0 9 4 17.6474 16.3531 3
 -1 -9 -4 8.73363 14.9872 3
 1 -9 4 -24.41 14.7267 3
 -1 -9 -4 10.7657 14.6231 3
 1 -9 4 -6.9287 14.8797 3
 -1 -9 -4 -1.4718 9.9934 1
 1 9 4 4.37398 18.8344 3
 1 9 4 -20.012 15.3522 3
 -1 9 -4 -18.859 17.281 3
 -1 9 -4 -8.2507 20.2033 3
 -2 -9 -4 -24.617 14.2591 3
 2 -9 4 9.22085 12.9791 3
 -2 -9 -4 3.1502 9.38194 1
 2 -9 4 16.0126 14.8626 3
 -2 -9 -4 -21.898 14.5631 3
 -2 9 -4 11.1843 20.1827 3
 2 9 4 -13.753 16.0171 3
 -2 9 -4 -9.6449 17.2924 3
 2 9 4 -11.29 19.993 3
 -17 0 5 -3.9664 17.6213 3
 -17 0 5 45.5942 13.4283 1
 17 0 -5 16.0033 12.0618 3
 17 0 -5 35.1069 15.0907 3
 -17 0 5 -16.585 11.8461 3
 -16 0 5 3.09999 10.3931 1
 -16 0 5 1.19231 11.3757 3
 -16 0 5 6.76757 10.0288 3
 16 0 -5 -21.98 12.5099 3
 16 0 -5 -2.6168 10.182 3
 -15 0 5 5.61524 9.0166 3
 15 0 -5 -16.653 11.2254 3
 -15 0 5 3.95701 9.87032 1
 15 0 -5 0.62202 8.80236 3
 -15 0 5 14.3631 8.98007 3
 -14 0 5 2.9415 8.98043 3
 14 0 -5 6.7274 8.28246 3
 -14 0 5 -6.2632 8.9867 1
 14 0 -5 16.0441 10.721 3
 -14 0 5 3.56122 7.92788 3
 13 0 -5 2.44149 10.9152 3
 -13 0 5 0.35077 6.94721 3
 -13 0 5 -4.1908 7.94448 1
 13 0 -5 2.30369 7.54264 3
 -13 0 5 10.1885 7.01627 3
 -12 0 5 -8.1738 6.34204 3
 -12 0 5 2.34791 7.29268 1
 -12 0 5 10.5725 5.92242 3
 12 0 -5 -1.1733 6.85105 3
 -11 0 5 5.62321 6.20824 3
 -11 0 5 -4.4635 7.05193 3
 11 0 -5 11.1224 11.1039 3
 -11 0 5 -7.4395 6.27576 1
 11 0 -5 -5.913 6.05196 3
 -10 0 5 28.2161 7.10009 3
 10 0 -5 36.4181 7.96507 3
 10 0 -5 26.0664 6.17724 3
 -9 0 5 0.07986 5.33353 1
 -9 0 5 4.06809 4.90969 3
 9 0 -5 6.29189 6.06726 3
 9 0 -5 2.31794 5.08774 3
 -9 0 5 5.22492 6.29288 3
 -8 0 5 16.5612 4.69155 3
 8 0 -5 12.4383 5.09211 3
 -8 0 5 -0.0098 5.03553 1
 7 0 -5 6.06175 5.08677 3
 -7 0 5 -1.3977 5.24164 3
 7 0 -5 3.50774 4.24181 3
 -7 0 5 6.44273 4.09923 3
 -7 0 5 -6.639 4.58579 1
 6 0 -5 1.50147 3.63576 3
 6 0 -5 4.16016 4.69877 3
 -6 0 5 -5.2868 4.43165 1
 -6 0 5 3.36976 3.65983 3
 -6 0 5 5.8074 4.86108 3
 6 0 -5 2.64872 4.21939 1
 -5 0 5 -1.4819 3.05853 3
 5 0 -5 -4.2868 2.96007 3
 5 0 -5 0.01921 3.75552 1
 -5 0 5 0.45942 4.17176 1
 5 0 -5 -0.3029 3.91821 3
 -5 0 5 4.59391 3.98824 3
 -4 0 5 -0.259 3.21816 3
 4 0 -5 -5.6683 3.32746 1
 4 0 -5 2.03773 2.61107 3
 4 0 -5 -0.6684 3.34694 3
 -4 0 5 -0.5647 3.87549 1
 -4 0 5 1.29207 2.54987 3
 3 0 -5 -4.5156 3.26617 1
 3 0 -5 2.01157 1.80293 3
 -3 0 5 -6.3671 3.44719 1
 2 0 -5 -2.1382 3.38538 2
 2 0 -5 0.81081 3.23703 1
 1 0 -5 -2.5421 3.10404 2
 1 0 -5 4.62117 1.93616 3
 -1 0 5 -4.9194 3.27435 2
 -1 0 5 7.98643 2.30442 3
 1 0 -5 3.27142 2.79106 3
 -1 0 5 7.39009 2.40843 3
 0 0 -5 0.23576 3.04403 2
 0 0 5 0.62763 3.11498 2
 -1 0 -5 15.9106 3.89677 3
 1 0 5 16.6359 4.29636 3
 -2 0 -5 9.78475 4.34361 3
 2 0 5 4.91268 5.32992 3
 2 0 5 3.15839 4.21876 3
 -2 0 -5 10.983 5.42851 3
 3 0 5 2.61396 5.39919 3
 -3 0 -5 3.88916 5.85681 3
 -3 0 -5 3.43224 4.40273 3
 3 0 5 4.95486 4.77981 3
 4 0 5 1.09776 4.94628 3
 -4 0 -5 4.8763 6.05469 3
 4 0 5 1.54062 5.94744 3
 -4 0 -5 0.8582 4.74407 3
 5 0 5 8.02275 5.2433 3
 -5 0 -5 -0.191 4.86326 3
 -5 0 -5 6.04303 6.7599 3
 5 0 5 8.30377 6.57944 3
 -6 0 -5 1.18317 6.78945 3
 6 0 5 -1.7797 6.63798 3
 6 0 5 1.5936 5.31712 3
 -6 0 -5 8.25658 5.6892 3
 7 0 5 4.33434 7.41646 3
 7 0 5 -0.9199 5.79732 3
 -7 0 -5 5.13215 5.92929 3
 -7 0 -5 5.6308 7.37954 3
 -8 0 -5 -1.2644 7.40021 3
 8 0 5 -4.1095 5.80765 3
 -8 0 -5 -3.7996 5.92098 3
 8 0 5 2.72442 7.61126 3
 9 0 5 -4.1246 8.21543 3
 -9 0 -5 -13.737 8.13426 3
 9 0 5 -2.1155 6.57237 3
 -9 0 -5 -6.4966 6.93215 3
 10 0 5 2.85568 7.28584 3
 10 0 5 2.0341 9.48542 3
 -10 0 -5 -0.9444 7.24413 3
 -10 0 -5 -18.983 8.33963 3
 11 0 5 -7.9408 10.3563 3
 -11 0 -5 -6.1639 9.74483 3
 11 0 5 -0.3521 7.74842 3
 -11 0 -5 -6.1469 8.41601 3
 -12 0 -5 -1.9087 11.0827 3
 12 0 5 9.73109 8.83783 3
 12 0 5 19.0296 11.5701 3
 -12 0 -5 11.5797 9.09087 3
 13 0 5 -0.2192 12.4194 3
 13 0 5 5.15575 9.53798 3
 -13 0 -5 1.03156 9.63915 3
 -13 0 -5 -22.383 10.9494 3
 14 0 5 1.31371 13.4596 3
 14 0 5 -16.406 10.2776 3
 -14 0 -5 -15.307 12.8119 3
 -14 0 -5 -6.8642 9.99073 3
 -15 0 -5 14.8338 11.9634 1
 -15 0 -5 7.4512 14.9756 3
 15 0 5 -5.5901 14.5373 3
 -15 0 -5 12.9 12.0602 3
 15 0 5 -0.7564 11.8633 3
 -16 0 -5 -22.161 12.9161 1
 -16 0 -5 6.18511 17.1925 3
 -16 0 -5 30.4715 13.6246 3
 16 0 5 -5.3321 13.2454 3
 16 0 5 -33.242 15.3932 3
 17 -1 -5 13.0952 13.1179 3
 -17 -1 5 7.02756 12.4603 1
 17 -1 -5 39.6635 14.5328 3
 17 1 -5 -11.101 11.994 3
 -17 1 5 9.13868 13.2339 1
 -17 1 5 -7.483 11.6831 3
 17 1 -5 -15.827 14.4445 3
 16 -1 -5 80.1037 14.9754 3
 -16 -1 5 55.2939 12.4277 1
 -16 -1 5 56.7059 12.2041 3
 16 -1 -5 50.9642 12.0116 3
 -16 1 5 68.3351 12.003 3
 16 1 -5 69.5082 14.9386 3
 -16 1 5 69.7931 13.3771 1
 16 1 -5 86.5204 12.3836 3
 15 -1 -5 41.0015 10.2208 3
 -15 -1 5 21.0221 10.255 1
 -15 -1 5 38.0547 9.95763 3
 15 -1 -5 27.3305 12.6046 3
 -15 1 5 57.0282 12.034 1
 -15 1 5 12.024 9.1394 3
 15 1 -5 26.495 9.82864 3
 15 1 -5 33.599 12.9156 3
 -15 1 5 29.8447 9.69344 3
 14 -1 -5 174.447 15.4651 3
 14 -1 -5 164.587 19.0829 3
 -14 -1 5 169.88 15.5237 3
 -14 -1 5 179.214 16.2922 1
 14 1 -5 150.329 15.8439 3
 14 1 -5 160.093 19.1799 3
 -14 1 5 149.187 17.4973 1
 -14 1 5 144.294 14.8778 3
 13 -1 -5 86.239 10.3851 3
 -13 -1 5 78.0063 9.5489 3
 -13 -1 5 83.5099 11.3339 1
 13 -1 -5 82.5468 15.1696 3
 13 1 -5 79.1759 11.6965 3
 13 1 -5 87.2435 10.3113 3
 -13 1 5 101.71 12.3629 3
 -13 1 5 81.6733 11.9142 1
 -12 -1 5 75.8963 9.36823 1
 12 -1 -5 100.833 12.63 3
 -12 -1 5 82.9429 9.08629 3
 12 1 -5 81.0887 10.9188 3
 12 1 -5 70.3693 9.04211 3
 -12 1 5 75.0965 10.0507 1
 -12 1 5 84.5827 11.6707 3
 -11 -1 5 47.6392 8.11728 1
 11 -1 -5 40.4647 12.0542 3
 11 -1 -5 44.7234 7.40518 3
 -11 -1 5 25.8198 12.5413 3
 11 1 -5 40.9743 9.57816 3
 11 1 -5 47.5352 7.70444 3
 -11 1 5 32.3091 11.9877 3
 -11 1 5 39.3843 8.49306 1
 -10 -1 5 323.61 14.4134 3
 10 -1 -5 322.89 14.0095 3
 10 -1 -5 315.211 15.7303 3
 -10 -1 5 322.787 14.7934 1
 10 1 -5 315.052 14.4032 3
 -10 1 5 331.176 16.0739 1
 -10 1 5 287.771 14.3766 3
 -10 1 5 336.306 13.7788 3
 -9 -1 5 -1.3079 5.35363 3
 9 -1 -5 -0.818 5.075 3
 -9 -1 5 1.89528 4.48974 3
 9 -1 -5 9.15131 6.17551 3
 -9 -1 5 -4.4014 4.89133 1
 9 1 -5 0.64504 4.94278 3
 -9 1 5 1.16169 6.0004 1
 -9 1 5 5.16669 5.8836 3
 -9 1 5 2.2802 4.63031 3
 9 1 -5 5.70716 8.91225 3
 -8 -1 5 1069.85 31.8981 3
 8 -1 -5 1248.97 32.3409 3
 -8 -1 5 1230.71 31.8109 3
 -8 -1 5 1190.35 31.8314 1
 8 -1 -5 1163.73 31.5398 3
 -8 1 5 1225.07 33.2072 1
 -8 1 5 1213.72 31.1767 3
 8 1 -5 1242.86 33.0237 3
 -8 1 5 1231.96 32.4224 3
 8 1 -5 1202.45 31.5897 3
 7 -1 -5 88.0085 7.83903 3
 7 -1 -5 108.735 9.8308 1
 7 -1 -5 89.7511 8.97103 3
 -7 -1 5 90.4396 7.95192 3
 -7 -1 5 91.102 8.03188 1
 -7 -1 5 78.8277 8.98306 3
 7 1 -5 96.8097 9.81222 3
 7 1 -5 89.0687 7.66282 3
 -7 1 5 83.1965 9.22246 3
 -7 1 5 79.5557 9.30174 1
 -7 1 5 91.3539 7.18317 3
 6 -1 -5 392.563 12.4724 3
 -6 -1 5 393.942 12.7327 3
 -6 -1 5 395.108 13.8203 3
 -6 -1 5 400.31 13.1698 1
 6 -1 -5 384.424 13.2179 3
 6 -1 -5 404.462 14.6168 1
 -6 1 5 382.106 13.482 3
 6 1 -5 395.621 12.7483 3
 -6 1 5 410.829 14.6989 1
 6 1 -5 394.864 13.9826 3
 -6 1 5 402.946 12.2621 3
 -5 -1 5 569.182 15.2814 3
 5 -1 -5 538.001 15.4542 3
 -5 -1 5 560.891 15.6167 1
 5 -1 -5 506.399 16.69 1
 -5 -1 5 551.881 16.0777 3
 5 -1 -5 527.2 14.8958 3
 5 1 -5 584.013 16.4437 3
 5 1 -5 552.891 15.245 3
 -5 1 5 552.128 17.0077 1
 -5 1 5 535.088 15.6611 3
 -5 1 5 532.069 14.7577 3
 4 -1 -5 44.7877 5.44287 1
 -4 -1 5 43.1613 5.02537 3
 4 -1 -5 44.3372 5.53599 3
 4 -1 -5 38.62 4.72527 3
 -4 -1 5 54.7278 6.71771 3
 -4 -1 5 48.2203 5.44966 1
 -4 1 5 38.0375 4.56285 3
 4 1 -5 44.1717 5.10581 1
 -4 1 5 45.1355 5.63371 3
 -4 1 5 41.8349 5.27331 1
 4 1 -5 55.1185 6.60206 3
 4 1 -5 49.9185 5.30442 3
 3 -1 -5 507.64 15.7001 1
 3 -1 -5 517.966 13.8323 3
 -3 -1 5 563.807 14.2724 1
 -3 -1 5 566.462 14.2888 3
 -3 -1 5 555.853 15.0067 3
 3 -1 -5 531.162 14.1389 3
 -3 1 5 527.364 14.2035 3
 -3 1 5 550.132 15.8732 1
 3 1 -5 555.765 15.1017 3
 3 1 -5 538.487 14.1949 1
 3 1 -5 547.399 14.3664 3
 -3 1 5 533.203 13.6829 3
 2 -1 -5 1001.08 24.3808 2
 2 -1 -5 978.139 25.6192 1
 2 -1 -5 1020.21 24.2815 3
 -2 -1 5 1062.83 24.5623 3
 -2 -1 5 1002.96 24.2026 3
 2 -1 -5 993.09 24.0774 3
 -2 1 5 967.166 24.25 3
 2 1 -5 1002.73 24.584 3
 -2 1 5 1044.05 24.7908 3
 2 1 -5 990.925 24.158 1
 2 1 -5 1009 25.5191 2
 2 1 -5 1027.78 25.3012 3
 1 -1 -5 7686.09 184.559 3
 1 -1 -5 7922.4 184.758 2
 1 -1 -5 8104.49 185.385 3
 -1 -1 5 8011.15 185.049 3
 -1 -1 5 8474.67 185.63 2
 1 1 -5 8003.1 185.093 2
 -1 1 5 8241.48 184.629 2
 1 1 -5 7946.38 185.077 3
 -1 1 5 7963.8 184.867 3
 0 -1 5 1374.93 34.5437 3
 0 -1 -5 1404.17 33.59 3
 0 -1 5 1383.27 33.8722 3
 0 -1 -5 1342.05 34.1261 3
 0 -1 5 1476.06 34.0056 2
 0 1 -5 1427.56 33.6308 3
 0 1 -5 1383.06 34.0132 2
 0 1 -5 1391.09 34.0163 3
 0 1 5 1390.29 34.1223 3
 0 1 5 1373.61 33.0568 2
 -1 -1 -5 1192.67 30.1458 3
 1 -1 5 1168.04 29.205 3
 1 -1 5 1228.82 29.8505 3
 -1 -1 -5 1161.04 29.2873 3
 1 -1 5 1145.3 29.1397 2
 -1 1 -5 1173.51 29.8234 3
 -1 1 -5 1193.59 29.2012 3
 1 1 5 1146.91 29.2503 3
 1 1 5 1199.9 30.0952 3
 -2 -1 -5 397.332 12.7352 3
 -2 -1 -5 372.581 13.9801 3
 2 -1 5 376.931 13.5258 3
 2 -1 5 386.76 12.6283 3
 2 1 5 385.662 12.6938 3
 -2 1 -5 376.034 13.6476 3
 -2 1 -5 400.727 12.5808 3
 2 1 5 388.08 13.9287 3
 3 -1 5 135.635 10.0849 3
 3 -1 5 134.555 8.54144 3
 -3 -1 -5 146.885 10.8207 3
 -3 -1 -5 135.031 8.7848 3
 3 1 5 131.287 8.83335 3
 3 1 5 145.078 10.478 3
 -3 1 -5 139.071 10.0273 3
 -3 1 -5 141.844 8.47907 3
 -4 -1 -5 142.805 11.7357 3
 4 -1 5 140.785 10.9313 3
 4 -1 5 139.178 9.49988 3
 -4 -1 -5 132.129 9.59455 3
 -4 1 -5 130.658 9.29979 3
 -4 1 -5 141.281 10.8573 3
 4 1 5 151.335 11.5109 3
 4 1 5 134.356 9.69069 3
 -5 -1 -5 403.983 15.2822 3
 -5 -1 -5 401.686 17.5943 3
 5 -1 5 395.597 15.1205 3
 5 -1 5 417.096 16.7948 3
 5 1 5 410.682 17.0735 3
 -5 1 -5 411.435 15.022 3
 5 1 5 404.99 15.5228 3
 -5 1 -5 397.82 16.5971 3
 -6 -1 -5 690.588 21.9393 3
 6 -1 5 661.535 21.51 3
 -6 -1 -5 694.768 23.8748 3
 6 -1 5 697.022 23.5244 3
 -6 1 -5 688.035 21.5595 3
 6 1 5 672.506 21.9417 3
 6 1 5 704.999 23.3724 3
 -6 1 -5 679.994 23.0854 3
 -7 -1 -5 451.973 17.7301 3
 -7 -1 -5 427.104 19.4643 3
 7 -1 5 431.081 17.4012 3
 7 -1 5 433.367 19.0027 3
 7 1 5 417.288 17.3885 3
 -7 1 -5 457.24 17.1231 3
 -7 1 -5 443.993 19.3782 3
 7 1 5 423.497 18.8349 3
 8 -1 5 127.167 14.4019 3
 -8 -1 -5 102.186 11.2471 3
 -8 -1 -5 117.544 12.2557 3
 8 -1 5 123.727 12.263 3
 -8 1 -5 126.011 14.6002 3
 8 1 5 112.162 12.0155 3
 -8 1 -5 132.399 11.8462 3
 8 1 5 116.262 14.3994 3
 9 -1 5 627.936 22.7686 3
 -9 -1 -5 641.543 25.829 3
 -9 -1 -5 662.031 23.5583 3
 9 -1 5 639.048 25.2635 3
 -9 1 -5 668.292 23.1663 3
 -9 1 -5 615.037 24.944 3
 9 1 5 650.691 25.3337 3
 9 1 5 628.649 23.1291 3
 10 -1 5 22.7161 10.2569 3
 -10 -1 -5 38.8482 9.08463 3
 -10 -1 -5 35.9273 10.7852 3
 10 -1 5 20.6388 8.56841 3
 10 1 5 24.8032 8.56283 3
 10 1 5 19.5923 9.71925 3
 -10 1 -5 27.7897 8.58054 3
 -10 1 -5 23.3156 9.89893 3
 11 -1 5 6.95343 8.49853 3
 -11 -1 -5 10.446 14.5956 3
 11 -1 5 4.05392 10.8658 3
 -11 -1 -5 1.59818 10.6607 3
 11 1 5 11.8455 10.6126 3
 11 1 5 17.7806 8.75128 3
 -11 1 -5 -0.1264 14.299 3
 -11 1 -5 1.87785 9.96356 3
 12 -1 5 19.1303 9.34322 3
 -12 -1 -5 14.3784 11.7046 3
 12 -1 5 13.1519 11.3428 3
 -12 -1 -5 5.94564 8.66015 3
 -12 1 -5 11.5615 9.56326 3
 12 1 5 19.114 9.3259 3
 12 1 5 27.7282 11.1651 3
 -12 1 -5 2.5287 11.0516 3
 -13 -1 -5 133.343 17.7901 3
 13 -1 5 164.293 22.2591 3
 -13 -1 -5 192.022 22.7208 3
 13 -1 5 133.94 18.4 3
 -13 1 -5 120.498 17.4974 1
 -13 1 -5 163.594 21.9966 3
 13 1 5 174.309 18.6248 3
 13 1 5 166.006 21.2866 3
 -13 1 -5 159.679 18.4869 3
 -14 -1 -5 108.668 13.7044 3
 -14 -1 -5 84.3713 15.7744 3
 14 -1 5 120.658 17.6199 3
 14 -1 5 95.57 13.9091 3
 -14 1 -5 81.1971 14.1 1
 -14 1 -5 90.906 16.2965 3
 14 1 5 68.6793 15.1317 3
 14 1 5 82.1489 13.4534 3
 -14 1 -5 100.065 12.9357 3
 15 -1 5 64.2414 16.8051 3
 -15 -1 -5 68.2383 14.2413 3
 -15 -1 -5 14.7951 15.2891 3
 15 -1 5 57.9132 13.9929 3
 -15 1 -5 64.9245 13.4121 3
 15 1 5 69.2453 18.0779 3
 -15 1 -5 61.0646 16.1854 3
 15 1 5 87.2537 14.4188 3
 -15 1 -5 39.9334 13.564 1
 16 -1 5 18.8165 14.094 3
 16 -1 5 -1.8969 16.9356 3
 -16 -1 -5 4.84997 13.0067 1
 -16 -1 -5 20.0081 18.2022 3
 -16 -1 -5 34.3525 15.1085 3
 -16 1 -5 25.7526 17.0989 3
 -16 1 -5 3.77565 14.13 3
 16 1 5 28.2252 18.0017 3
 -16 1 -5 -18.031 13.8371 1
 16 1 5 23.8072 13.7029 3
 16 -2 -5 21.8611 11.3297 3
 -16 -2 5 12.1575 10.7035 1
 -16 -2 5 16.8134 11.1124 3
 16 -2 -5 -12.767 12.0192 3
 -16 2 5 8.85746 11.6026 3
 -16 2 5 12.2506 11.9772 3
 -16 2 5 42.6003 13.4738 1
 16 2 -5 7.40626 10.8637 3
 16 2 -5 20.2465 14.0851 3
 -15 -2 5 46.225 10.8797 3
 15 -2 -5 68.541 11.8197 3
 -15 -2 5 81.6935 11.5453 1
 15 -2 -5 51.1289 13.0666 3
 -15 2 5 46.956 11.0323 3
 15 2 -5 79.6458 14.8462 3
 -15 2 5 12.4977 15.8619 3
 -15 2 5 63.7853 13.3103 1
 15 2 -5 72.593 12.3175 3
 14 -2 -5 23.4802 9.06439 3
 -14 -2 5 4.87755 8.07873 1
 14 -2 -5 6.45695 10.8764 3
 -14 -2 5 11.0125 9.15623 3
 14 2 -5 4.6547 9.38347 3
 14 2 -5 -6.9453 10.898 3
 -14 2 5 -5.579 9.70688 1
 -14 2 5 -1.2743 8.61384 3
 13 -2 -5 13.8838 8.60779 3
 13 -2 -5 25.3552 9.79048 3
 -13 -2 5 27.5653 8.88746 3
 -13 -2 5 30.0793 8.2408 1
 -13 2 5 12.2056 10.066 1
 13 2 -5 17.6116 8.79061 3
 -13 2 5 14.3541 8.15186 3
 13 2 -5 25.1159 10.9607 3
 12 -2 -5 9.94588 7.63946 3
 12 -2 -5 9.493 9.0398 3
 -12 -2 5 12.7837 7.36151 1
 -12 -2 5 32.2592 8.14608 3
 -12 2 5 11.847 8.52339 1
 12 2 -5 16.2269 7.73781 3
 12 2 -5 22.4876 10.2687 3
 -12 2 5 8.43374 7.05943 3
 11 -2 -5 40.1023 9.56143 3
 -11 -2 5 44.2733 7.6834 1
 -11 -2 5 37.8592 8.06429 3
 11 -2 -5 39.2153 14.3473 3
 -11 2 5 37.0201 7.34804 3
 -11 2 5 31.3825 10.6269 1
 11 2 -5 34.0307 10.033 3
 11 2 -5 39.1201 13.7326 3
 10 -2 -5 14.7046 10.5731 3
 -10 -2 5 8.02114 6.3336 3
 10 -2 -5 5.24193 6.38647 3
 -10 -2 5 5.67808 5.7408 1
 -10 2 5 -1.4382 5.41881 3
 10 2 -5 7.16047 7.92067 3
 10 2 -5 -6.7264 5.59953 3
 -10 2 5 2.1919 5.54698 3
 -10 2 5 0.00807 6.95008 1
 -9 -2 5 196.484 11.4105 3
 -9 -2 5 182.204 10.9038 1
 9 -2 -5 186.256 11.4591 3
 9 2 -5 202.462 13.9251 3
 9 2 -5 189.088 11.2815 3
 -9 2 5 190.367 13.2982 1
 -9 2 5 195.966 10.8684 3
 -8 -2 5 166.735 9.73064 1
 8 -2 -5 170.065 10.2979 3
 -8 -2 5 197.758 10.3262 3
 8 -2 -5 176.149 12.0893 1
 8 -2 -5 162.196 13.2789 3
 8 2 -5 172.566 10.3673 3
 -8 2 5 161.21 12.0533 1
 -8 2 5 181.949 9.83385 3
 8 2 -5 209.082 12.7571 3
 -7 -2 5 340.946 12.056 1
 -7 -2 5 363.181 13.0999 3
 7 -2 -5 351.442 14.8271 1
 7 -2 -5 327.832 13.6787 3
 7 -2 -5 342.147 12.68 3
 -7 2 5 343.861 14.6514 1
 7 2 -5 354.246 15.1706 3
 7 2 -5 337.352 13.0419 3
 -7 2 5 325.258 12.2698 3
 6 -2 -5 166.804 8.82585 3
 6 -2 -5 143.049 10.812 1
 -6 -2 5 172.428 9.23758 3
 6 -2 -5 173.682 10.1446 3
 -6 -2 5 139.059 7.84725 1
 -6 2 5 155.824 8.48868 3
 -6 2 5 161.461 10.716 1
 6 2 -5 199.6 11.5216 3
 6 2 -5 158.994 9.4168 3
 5 -2 -5 200.142 9.0974 3
 -5 -2 5 214.293 9.48489 3
 5 -2 -5 177.95 10.7509 1
 -5 -2 5 190.83 7.80869 1
 5 -2 -5 198.823 10.0711 3
 -5 2 5 200.264 10.9938 1
 5 2 -5 208.749 9.98187 3
 -5 2 5 206.01 8.75074 3
 4 -2 -5 -1.1835 4.68334 3
 -4 -2 5 -2.0972 2.6844 1
 4 -2 -5 -0.5634 4.82244 1
 -4 -2 5 0.58615 3.83897 3
 4 -2 -5 0.21001 3.56257 3
 4 2 -5 1.50759 5.04109 3
 4 2 -5 1.60086 4.06734 3
 -4 2 5 0.66503 4.59764 1
 -4 2 5 -1.1577 3.35595 3
 -4 2 5 -1.6045 2.59092 3
 3 -2 -5 444.407 14.849 1
 3 -2 -5 457.612 13.659 3
 -3 -2 5 485.067 14.3258 3
 3 2 -5 502.424 14.6099 3
 3 2 -5 519.555 15.8239 3
 3 2 -5 469.695 14.8132 2
 -3 2 5 451.465 14.914 1
 2 -2 -5 251.754 10.5918 1
 -2 -2 5 281.503 9.89402 3
 2 -2 -5 248.918 9.35499 3
 2 -2 -5 276.366 10.0839 3
 -2 -2 5 294.135 10.5047 3
 2 2 -5 260.085 10.2455 2
 -2 2 5 290.442 11.4557 3
 2 2 -5 297.693 12.061 3
 2 2 -5 272.702 10.7136 3
 -1 -2 5 708.81 19.0561 3
 -1 -2 5 742.35 19.2767 2
 1 -2 -5 680.583 20.207 3
 -1 -2 5 704.343 19.5186 3
 1 -2 -5 711.219 19.1847 3
 1 2 -5 702.122 19.1014 2
 1 2 -5 720.127 19.7127 3
 -1 2 5 690.572 19.1787 3
 1 2 -5 714.931 19.0218 3
 -1 2 5 708.526 20.2317 3
 0 -2 -5 465.622 15.7091 3
 0 -2 5 469.717 14.664 3
 0 -2 5 455.58 13.8567 2
 0 -2 -5 462.344 14.071 3
 0 -2 5 456.67 13.9413 3
 0 2 5 460.667 14.1838 3
 0 2 5 486.216 15.6059 3
 0 2 -5 435.289 13.7236 2
 0 2 -5 453.306 14.6863 3
 0 2 -5 463.118 14.0003 3
 1 -2 5 958.43 24.5669 3
 -1 -2 -5 897.369 25.7403 3
 -1 -2 -5 932.864 24.6833 3
 1 -2 5 941.655 25.1264 3
 1 -2 5 927.35 24.0645 2
 -1 2 -5 927.34 25.1337 3
 -1 2 -5 959.72 24.4829 3
 1 2 5 939.08 25.8339 3
 1 2 5 901.207 24.5742 3
 -2 -2 -5 158.653 9.18967 3
 2 -2 5 155.326 8.29277 2
 2 -2 5 157.209 9.94809 3
 2 -2 5 161.322 9.0744 3
 -2 -2 -5 134.554 10.7632 3
 -2 2 -5 154.259 10.3164 3
 -2 2 -5 169.235 9.00642 3
 2 2 5 160.113 11.3257 3
 2 2 5 150.789 9.16694 3
 -3 -2 -5 100.734 8.83298 3
 -3 -2 -5 95.9577 11.0892 3
 3 -2 5 83.1964 8.44942 3
 3 -2 5 106.906 9.55814 3
 3 2 5 89.2978 10.9634 3
 -3 2 -5 92.3193 8.35416 3
 -3 2 -5 93.2309 9.9451 3
 3 2 5 94.5778 8.79032 3
 4 -2 5 377.739 15.4205 3
 4 -2 5 368.017 13.8701 3
 -4 -2 -5 384.347 14.2257 3
 -4 -2 -5 362.606 16.2696 3
 -4 2 -5 351.862 13.5749 3
 4 2 5 378.508 16.227 3
 4 2 5 342.375 14.0688 3
 -4 2 -5 354.03 15.3773 3
 -5 -2 -5 107.047 12.4334 3
 -5 -2 -5 70.7423 9.38462 3
 5 -2 5 60.3708 6.75722 3
 5 -2 5 66.9699 8.25633 3
 -5 2 -5 88.6718 11.8987 3
 5 2 5 74.1404 8.70269 3
 -5 2 -5 70.8307 9.26859 3
 5 2 5 73.3025 9.80608 3
 -6 -2 -5 751.014 25.4728 3
 6 -2 5 772.552 24.9265 3
 6 -2 5 736 23.0571 3
 -6 -2 -5 747.298 23.2812 3
 -6 2 -5 733.552 24.3306 3
 6 2 5 752.777 24.9959 3
 6 2 5 740.198 23.5105 3
 -6 2 -5 744.128 23.0557 3
 -7 -2 -5 115.793 11.562 3
 7 -2 5 122.434 14.1124 3
 -7 -2 -5 116.424 14.7332 3
 7 -2 5 117.41 11.7843 3
 7 2 5 123.411 14.0143 3
 -7 2 -5 121.479 11.407 3
 -7 2 -5 119.771 13.7775 3
 7 2 5 120.924 11.8867 3
 -8 -2 -5 13.1832 9.18063 3
 -8 -2 -5 27.672 7.426 3
 8 -2 5 27.6546 9.01782 3
 8 -2 5 23.5473 7.40417 3
 8 2 5 23.4083 7.54143 3
 -8 2 -5 17.0315 7.03845 3
 -8 2 -5 23.0311 8.81675 3
 8 2 5 22.2767 9.1454 3
 9 -2 5 4.44781 9.72926 3
 -9 -2 -5 24.1317 10.2706 3
 -9 -2 -5 26.3378 8.2454 3
 9 -2 5 8.55904 7.73612 3
 9 2 5 20.2789 9.54031 3
 -9 2 -5 15.6139 9.54686 3
 -9 2 -5 4.62504 7.5597 3
 9 2 5 14.5611 8.10803 3
 -10 -2 -5 61.1027 12.2135 3
 -10 -2 -5 48.0431 10.0522 3
 10 -2 5 56.1706 12.2689 3
 10 -2 5 55.5216 9.9052 3
 10 2 5 48.7274 9.9757 3
 -10 2 -5 48.6089 9.43713 3
 -10 2 -5 61.7456 11.7451 3
 10 2 5 66.6644 12.0008 3
 11 -2 5 124.122 15.2748 3
 -11 -2 -5 142.34 16.4466 3
 11 -2 5 141.534 18.0227 3
 -11 -2 -5 107.554 14.2011 3
 -11 2 -5 129.256 15.3704 1
 11 2 5 116.372 16.1379 3
 -11 2 -5 136.109 15.2289 3
 11 2 5 121.56 14.9986 3
 -11 2 -5 113.286 15.6172 3
 -12 -2 -5 25.8273 12.4496 3
 12 -2 5 30.1997 10.1682 3
 -12 -2 -5 25.7371 10.4228 3
 12 -2 5 29.5067 12.7353 3
 -12 2 -5 30.7176 12.1524 3
 12 2 5 34.6353 10.9242 3
 -12 2 -5 27.7474 10.6147 3
 -12 2 -5 17.5143 9.47865 1
 12 2 5 22.1078 12.6531 3
 13 -2 5 20.1825 13.1875 3
 -13 -2 -5 7.33364 10.6686 3
 13 -2 5 3.66358 10.675 3
 -13 -2 -5 17.2315 13.4918 3
 13 2 5 21.9294 13.3025 3
 -13 2 -5 -20.505 12.7075 3
 -13 2 -5 0.28261 10.3556 1
 -13 2 -5 -8.1954 9.1284 3
 13 2 5 -8.5682 10.3074 3
 -14 -2 -5 66.8911 13.1134 3
 -14 -2 -5 35.6597 14.7294 3
 14 -2 5 71.7578 16.5172 3
 14 -2 5 44.596 12.8801 3
 -14 2 -5 69.2421 12.8857 3
 14 2 5 40.1091 13.0248 3
 14 2 5 32.0481 15.7317 3
 -14 2 -5 32.9056 12.0214 1
 -14 2 -5 42.3294 14.8143 3
 -15 -2 -5 12.8339 12.7754 3
 -15 -2 -5 35.9079 16.7196 3
 15 -2 5 32.1692 13.5412 3
 15 -2 5 17.1648 16.273 3
 15 2 5 1.88423 12.438 3
 -15 2 -5 30.5151 13.4405 1
 -15 2 -5 31.1466 13.8076 3
 -15 2 -5 4.4378 15.612 3
 15 2 5 -18.758 16.1579 3
 16 -3 -5 51.8009 12.9727 3
 -16 -3 5 24.3961 14.8576 3
 16 -3 -5 55.2121 15.7207 3
 -16 -3 5 44.7384 11.8331 1
 -16 -3 5 34.5857 15.689 3
 -16 3 5 38.8684 14.8582 3
 16 3 -5 5.32825 15.682 3
 -16 3 5 50.3705 16.0384 1
 16 3 -5 9.5124 12.8993 3
 -15 -3 5 0.81913 10.8899 3
 -15 -3 5 23.3306 9.46344 1
 15 -3 -5 -11.252 9.84838 3
 -15 -3 5 1.84574 14.7293 3
 15 -3 -5 28.5645 13.2767 3
 -15 3 5 6.57367 9.95035 3
 15 3 -5 0.68195 11.0667 3
 15 3 -5 -20.519 14.3041 3
 -15 3 5 26.9052 12.7132 1
 14 -3 -5 45.4149 12.2966 3
 14 -3 -5 33.8402 10.7849 3
 -14 -3 5 26.7373 8.48787 1
 -14 -3 5 39.5444 10.8455 3
 -14 -3 5 35.5587 13.4052 3
 -14 3 5 16.2169 10.9758 1
 -14 3 5 21.3796 9.20357 3
 14 3 -5 27.9467 13.7188 3
 14 3 -5 25.2051 10.3464 3
 -13 -3 5 15.4758 9.42506 3
 -13 -3 5 -3.1465 11.0842 3
 13 -3 -5 30.9563 10.3155 3
 -13 -3 5 9.0974 7.73838 1
 13 -3 -5 -0.3606 9.13908 3
 13 3 -5 -0.2003 11.3481 3
 -13 3 5 12.0209 8.18037 3
 -13 3 5 -6.8348 9.61604 1
 13 3 -5 -5.409 8.59511 3
 12 -3 -5 90.4488 11.7247 3
 12 -3 -5 114.523 14.9218 3
 -12 -3 5 83.7169 10.5398 3
 -12 -3 5 86.4614 12.3688 1
 -12 -3 5 99.7914 13.0886 3
 12 3 -5 82.2768 10.7879 3
 -12 3 5 94.7609 11.9793 1
 -12 3 5 103.467 12.4307 3
 12 3 -5 107.235 13.6169 3
 -11 -3 5 16.8161 9.82865 3
 -11 -3 5 20.9245 6.92703 1
 11 -3 -5 16.5209 7.94762 3
 -11 -3 5 13.9593 7.37727 3
 11 -3 -5 18.1602 8.42957 3
 -11 3 5 21.3856 8.75225 1
 -11 3 5 14.8945 6.91596 3
 11 3 -5 22.6541 7.95794 3
 11 3 -5 25.0662 9.5201 3
 -10 -3 5 114.782 10.4086 1
 10 -3 -5 109.985 14.889 3
 -10 -3 5 124.181 12.0541 3
 10 -3 -5 104.145 10.8165 3
 -10 -3 5 112.909 15.3076 3
 10 3 -5 99.2546 11.1955 3
 10 3 -5 121.453 15.7547 3
 -10 3 5 103.07 18.1404 1
 -10 3 5 106.075 11.0998 3
 -9 -3 5 1.77612 5.02446 1
 9 -3 -5 -7.8221 6.64431 3
 -9 -3 5 16.5621 8.24469 3
 9 -3 -5 -2.805 5.77982 3
 -9 -3 5 6.44455 5.90604 3
 9 3 -5 2.29694 8.15228 3
 9 3 -5 2.28051 6.40605 3
 -9 3 5 -10.216 5.5469 3
 -9 3 5 1.6792 6.88992 1
 8 -3 -5 0.81671 5.45434 3
 8 -3 -5 8.94728 7.23684 1
 -8 -3 5 0.69535 4.18506 1
 -8 -3 5 8.14257 7.62682 3
 -8 -3 5 1.78321 5.27241 3
 8 -3 -5 0.69984 6.15872 3
 8 3 -5 3.33388 7.31537 3
 8 3 -5 8.01357 6.02881 3
 -8 3 5 3.42803 5.09597 3
 -8 3 5 0.65644 6.45693 1
 7 -3 -5 101.376 11.6129 1
 -7 -3 5 116.673 13.0929 3
 -7 -3 5 110.605 9.55822 3
 -7 -3 5 104.404 7.10793 1
 7 -3 -5 115.802 10.4898 3
 7 -3 -5 112.39 9.49823 3
 -7 3 5 100.173 11.3202 1
 7 3 -5 97.934 12.5324 3
 -7 3 5 105.977 8.88628 3
 7 3 -5 101.261 10.2674 3
 -6 -3 5 4.11233 4.7549 3
 6 -3 -5 2.51762 5.29676 3
 6 -3 -5 -5.4547 5.50409 1
 6 -3 -5 1.86263 4.67424 3
 -6 -3 5 -1.4607 3.02102 1
 -6 -3 5 10.7911 6.73197 3
 -6 3 5 2.71418 5.75726 1
 6 3 -5 5.02835 5.25423 3
 6 3 -5 2.74965 6.68645 3
 -6 3 5 2.56362 4.53534 3
 5 -3 -5 469.884 17.105 1
 -5 -3 5 511.059 19.0111 3
 -5 -3 5 499.97 16.3636 3
 -5 -3 5 474.147 12.8203 1
 5 -3 -5 489.079 16.5865 3
 5 -3 -5 480.624 15.8804 3
 -5 3 5 463.528 15.4518 3
 -5 3 5 496.12 17.234 1
 5 3 -5 508.434 18.672 3
 5 3 -5 475.497 16.7532 3
 -5 3 5 491.725 17.1691 3
 4 -3 -5 935.415 25.5237 3
 4 -3 -5 936.629 26.5085 1
 -4 -3 5 992.941 26.2436 3
 4 -3 -5 935.415 26.0311 3
 4 3 -5 955.374 26.4222 3
 -4 3 5 940.908 26.4461 1
 -4 3 5 953.76 26.3562 3
 -4 3 5 942.286 25.2676 3
 4 3 -5 956.282 26.0014 2
 4 3 -5 957.598 27.7509 3
 3 -3 -5 15.9249 5.15013 3
 -3 -3 5 6.24345 4.86089 3
 3 -3 -5 1.88042 4.99047 1
 -3 -3 5 3.93064 4.60641 3
 3 -3 -5 3.28253 4.50789 3
 -3 3 5 7.78546 6.09281 3
 -3 3 5 8.43202 5.07784 3
 3 3 -5 8.6023 4.86724 2
 -3 3 5 10.1333 4.88377 1
 3 3 -5 21.1553 6.58436 3
 3 3 -5 8.1144 5.0344 3
 2 -3 -5 18.8025 4.72744 3
 2 -3 -5 30.341 5.31748 3
 -2 -3 5 14.7376 4.61191 3
 -2 -3 5 26.0459 5.54006 3
 2 -3 -5 22.4296 5.18354 1
 -2 3 5 26.6327 6.4013 3
 2 3 -5 16.9616 4.69936 2
 2 3 -5 32.7226 5.87961 3
 -2 3 5 26.6515 5.43151 3
 2 3 -5 27.9906 6.82249 3
 1 -3 -5 23.5179 5.22514 3
 1 -3 -5 14.9999 4.48698 3
 -1 -3 5 13.6456 4.55444 2
 -1 -3 5 21.8256 5.56896 3
 -1 -3 5 18.4582 4.7521 3
 1 -3 -5 20.85 4.89486 1
 1 3 -5 18.9353 5.30007 3
 -1 3 5 19.0895 5.20883 3
 1 3 -5 14.0663 4.84148 2
 1 3 -5 16.3626 4.80961 3
 -1 3 5 32.1806 6.50068 3
 0 -3 5 209.708 9.36581 2
 0 -3 -5 202.492 10.6236 3
 0 -3 5 218.402 10.318 3
 0 -3 -5 202.251 12.7105 3
 0 -3 5 206.574 11.0538 3
 0 3 -5 205.112 9.47923 2
 0 3 -5 221.493 11.4454 3
 0 3 5 204.79 10.7803 3
 0 3 -5 204.596 7.34103 1
 0 3 -5 219.05 10.2832 3
 0 3 5 198.839 12.8418 3
 -1 -3 -5 883.718 26.9199 3
 1 -3 5 916.609 25.138 3
 1 -3 5 914.709 24.1844 2
 1 -3 5 944.743 26.0014 3
 -1 -3 -5 902.206 25.4099 3
 -1 3 -5 940.934 25.2278 3
 1 3 5 899.452 25.5104 3
 -1 3 -5 913.445 23.3415 1
 -1 3 -5 905.172 25.9477 3
 1 3 5 918.045 26.9966 3
 -2 -3 -5 44.508 6.29919 3
 -2 -3 -5 31.8493 7.21391 3
 2 -3 5 42.4913 5.91741 3
 2 -3 5 45.9695 5.34639 2
 2 -3 5 44.9802 6.88875 3
 2 3 5 44.1602 6.43152 3
 -2 3 -5 46.6695 6.07878 3
 -2 3 -5 45.0496 5.13736 1
 2 3 5 37.555 7.71298 3
 -2 3 -5 46.4987 6.93264 3
 -3 -3 -5 205.788 11.4216 3
 3 -3 5 200.03 10.9433 3
 3 -3 5 195.262 9.77206 2
 3 -3 5 191.114 12.2512 3
 -3 -3 -5 188.785 13.5174 3
 3 3 5 204.698 13.6146 3
 -3 3 -5 190.919 12.347 3
 -3 3 -5 191.377 9.86191 1
 -3 3 -5 202.195 10.9531 3
 3 3 5 181.026 11.2713 3
 4 -3 5 5.64155 5.55776 3
 -4 -3 -5 8.29019 7.18037 3
 -4 -3 -5 4.03351 5.4502 3
 4 -3 5 -0.4169 5.8934 3
 4 3 5 8.96829 7.18481 3
 4 3 5 3.41055 5.24326 3
 -4 3 -5 -1.218 5.31382 3
 -4 3 -5 -3.6398 4.69439 1
 -4 3 -5 6.16902 5.87606 3
 5 -3 5 16.2357 6.60578 3
 -5 -3 -5 3.33225 5.76609 3
 -5 -3 -5 12.5554 7.43008 3
 5 -3 5 -2.7521 5.4911 3
 5 3 5 -5.9366 7.37789 3
 -5 3 -5 12.8143 6.00096 3
 -5 3 -5 10.5131 6.84495 3
 5 3 5 5.74051 5.68097 3
 -5 3 -5 3.53814 5.31226 1
 -6 -3 -5 111.46 11.4165 3
 -6 -3 -5 123.012 14.7064 3
 6 -3 5 123.606 12.8403 3
 6 -3 5 110.036 11.2119 3
 6 3 5 118.357 11.7706 3
 -6 3 -5 124.082 11.4875 3
 -6 3 -5 101.545 10.9417 1
 -6 3 -5 135.077 13.4056 3
 6 3 5 117.099 14.4384 3
 -7 -3 -5 11.7576 8.8209 3
 7 -3 5 -0.4812 6.24438 3
 7 -3 5 5.75391 7.55162 3
 -7 -3 -5 10.4974 6.38571 3
 7 3 5 4.00614 7.01611 3
 -7 3 -5 0.95251 6.41361 3
 -7 3 -5 -0.1152 7.98818 3
 -7 3 -5 3.90449 6.18063 1
 7 3 5 21.3691 8.59799 3
 8 -3 5 35.4187 8.18871 3
 -8 -3 -5 44.099 10.9091 3
 -8 -3 -5 32.0692 8.30793 3
 8 -3 5 34.3077 9.26398 3
 8 3 5 23.688 10.253 3
 -8 3 -5 20.359 7.77104 1
 -8 3 -5 47.4587 10.1064 3
 8 3 5 25.1136 8.08416 3
 -8 3 -5 28.393 7.8918 3
 9 -3 5 37.7763 10.6575 3
 -9 -3 -5 43.0498 11.2792 3
 -9 -3 -5 48.6707 9.44873 3
 9 -3 5 35.2999 9.22782 3
 -9 3 -5 30.4694 8.70988 3
 -9 3 -5 46.1187 11.2842 3
 -9 3 -5 26.8656 8.44 1
 9 3 5 60.4088 12.0899 3
 9 3 5 37.8779 8.9725 3
 -10 -3 -5 73.4524 11.2674 3
 10 -3 5 84.908 13.4479 3
 -10 -3 -5 75.2451 13.5045 3
 10 -3 5 68.1023 10.8533 3
 10 3 5 78.2869 11.1142 3
 -10 3 -5 90.0938 13.4751 3
 10 3 5 87.2233 13.9424 3
 -10 3 -5 91.1651 14.2956 3
 -10 3 -5 87.5643 11.6263 1
 11 -3 5 39.7282 13.3481 3
 11 -3 5 45.6728 11.5465 3
 -11 -3 -5 32.8416 10.4533 3
 -11 -3 -5 49.4405 14.1442 3
 -11 3 -5 48.042 10.3278 3
 -11 3 -5 44.9082 10.7111 1
 11 3 5 58.1655 11.3639 3
 -11 3 -5 36.7566 12.4287 3
 11 3 5 37.3581 11.9645 3
 12 -3 5 61.4023 13.108 3
 -12 -3 -5 52.4371 15.2551 3
 12 -3 5 67.6593 15.0291 3
 -12 -3 -5 65.0013 12.8787 3
 -12 3 -5 55.4177 12.0334 1
 12 3 5 62.8784 14.9986 3
 -12 3 -5 74.9144 11.8724 3
 12 3 5 66.3806 12.5725 3
 -12 3 -5 84.0018 15.4325 3
 13 -3 5 47.9984 15.1792 3
 -13 -3 -5 61.6285 15.8112 3
 -13 -3 -5 35.9389 12.7532 3
 13 -3 5 31.2724 12.8328 3
 -13 3 -5 18.0052 11.6268 1
 -13 3 -5 35.3667 11.9493 3
 13 3 5 32.0919 15.2466 3
 -13 3 -5 29.494 15.1416 3
 13 3 5 50.5173 12.3308 3
 -14 -3 -5 41.1898 16.4817 3
 14 -3 5 16.9857 17.2985 3
 14 -3 5 -8.608 12.4468 3
 -14 -3 -5 10.3724 12.5656 3
 -14 3 -5 8.05253 11.7084 1
 -14 3 -5 11.3924 15.3364 3
 -14 3 -5 28.7119 12.9237 3
 14 3 5 2.61146 12.1678 3
 14 3 5 29.2351 16.5826 3
 -15 -3 -5 37.731 15.5308 3
 15 -3 5 6.05597 16.7648 3
 -15 -3 -5 17.92 18.2791 3
 15 -3 5 -4.3678 13.7776 3
 -15 3 -5 8.02958 14.1357 3
 15 3 5 9.37392 17.881 3
 15 3 5 32.4185 14.55 3
 -15 3 -5 25.8995 14.632 1
 -15 3 -5 -11.605 17.1411 3
 15 -4 -5 29.9352 14.0214 3
 -15 -4 5 -4.6392 14.0523 3
 -15 -4 5 9.99832 9.76443 1
 15 -4 -5 -2.2916 14.0379 3
 -15 -4 5 -6.5228 16.025 3
 -15 4 5 23.3242 13.8758 1
 15 4 -5 -16.817 12.2727 3
 15 4 -5 -4.3599 15.4617 3
 -15 4 5 4.17488 17.2065 3
 -15 4 5 -3.6363 11.4769 3
 -14 -4 5 12.4791 10.9626 3
 14 -4 -5 1.67519 11.4827 3
 -14 -4 5 14.6813 8.07372 1
 14 -4 -5 11.8076 12.8224 3
 -14 -4 5 9.57695 14.0356 3
 -14 4 5 12.5917 13.2585 3
 14 4 -5 -9.7185 10.8957 3
 14 4 -5 1.65742 14.9433 3
 -14 4 5 6.96736 10.4444 3
 -14 4 5 6.28945 12.2697 1
 -13 -4 5 112.002 15.8923 3
 -13 -4 5 88.1936 12.9288 1
 13 -4 -5 101.041 12.7596 3
 -13 -4 5 73.3004 12.1043 3
 13 -4 -5 81.6087 13.8127 3
 -13 4 5 84.2936 14.1711 1
 -13 4 5 91.88 13.6581 3
 13 4 -5 84.5158 15.3566 3
 13 4 -5 93.2404 12.6366 3
 -13 4 5 102.756 11.4952 3
 -12 -4 5 4.2941 9.11427 3
 -12 -4 5 -21.533 11.2757 3
 12 -4 -5 -22.355 9.33326 3
 12 -4 -5 -7.6861 8.84447 3
 -12 -4 5 4.80949 6.53462 1
 -12 4 5 -15.696 9.75867 1
 -12 4 5 18.7663 8.1853 3
 -12 4 5 1.13051 10.6293 3
 12 4 -5 10.6158 9.2356 3
 12 4 -5 -22.047 11.1049 3
 -11 -4 5 135.586 14.3267 3
 11 -4 -5 120.312 15.699 3
 -11 -4 5 136.793 11.5342 1
 -11 -4 5 137.041 15.3362 3
 11 -4 -5 119.225 15.4316 3
 11 4 -5 145.591 15.8252 3
 11 4 -5 148.671 19.9813 3
 -11 4 5 135.34 17.477 1
 -11 4 5 128.734 13.5585 3
 -11 4 5 124.731 16.4128 3
 -10 -4 5 0.89186 9.86535 3
 10 -4 -5 1.258 8.36712 3
 -10 -4 5 -0.266 7.43826 3
 -10 -4 5 5.92332 5.56898 1
 10 -4 -5 4.40139 8.02568 3
 -10 4 5 -1.3714 6.70497 3
 10 4 -5 5.92837 10.4381 3
 -10 4 5 -0.8728 9.03258 3
 10 4 -5 2.00613 7.95743 3
 -10 4 5 1.67104 8.88399 1
 -9 -4 5 159.402 9.63155 1
 9 -4 -5 132.016 16.3757 3
 9 -4 -5 169.739 14.479 3
 -9 -4 5 158.73 18.239 3
 -9 -4 5 166.431 13.4892 3
 -9 4 5 159.956 12.5159 3
 9 4 -5 146.149 17.7805 3
 -9 4 5 127.764 18.8404 1
 -9 4 5 144.923 14.6014 3
 -8 -4 5 12.0943 9.02707 3
 -8 -4 5 7.09628 4.23114 1
 8 -4 -5 2.47078 7.10434 3
 8 -4 -5 1.71017 7.59961 1
 -8 -4 5 12.1746 6.68039 3
 8 -4 -5 8.73583 6.69683 3
 -8 4 5 5.07075 6.18699 3
 -8 4 5 9.0419 7.78532 1
 8 4 -5 4.41671 7.10087 3
 -8 4 5 -0.5333 7.12362 3
 8 4 -5 -1.3301 8.95445 3
 -7 -4 5 201.129 16.2527 3
 7 -4 -5 201.17 13.5379 3
 7 -4 -5 204.286 12.6576 3
 -7 -4 5 200.799 8.11809 1
 7 -4 -5 212.976 14.6092 1
 -7 -4 5 219.086 13.3682 3
 -7 4 5 205.516 14.0259 1
 -7 4 5 186.72 13.4931 3
 7 4 -5 206.24 16.1269 3
 -7 4 5 184.835 11.9395 3
 7 4 -5 219.418 13.8107 3
 6 -4 -5 44.1066 6.98884 3
 -6 -4 5 50.068 9.53377 3
 -6 -4 5 57.6225 7.42045 3
 6 -4 -5 37.0412 7.69714 1
 6 -4 -5 40.921 7.36865 3
 6 4 -5 50.8442 9.45014 3
 -6 4 5 58.7668 8.19524 1
 -6 4 5 56.0263 7.85346 3
 6 4 -5 51.2034 7.77702 3
 -6 4 5 52.4999 6.71101 3
 5 -4 -5 291.1 13.405 3
 -5 -4 5 301.055 13.9816 3
 5 -4 -5 289.019 14.06 3
 5 -4 -5 271.124 13.8909 1
 -5 4 5 286.429 14.6496 3
 5 4 -5 295.92 16.5917 3
 -5 4 5 306.982 13.0313 3
 5 4 -5 292.749 13.2019 2
 5 4 -5 311.809 14.3387 3
 -5 4 5 299.324 13.9115 1
 4 -4 -5 98.387 9.58031 3
 4 -4 -5 96.8644 10.5844 3
 -4 -4 5 94.2946 9.7971 3
 4 -4 -5 109.588 10.2856 1
 -4 -4 5 115.438 10.4157 3
 -4 4 5 111.346 9.87175 1
 4 4 -5 99.2212 10.5248 3
 -4 4 5 99.066 11.0715 3
 4 4 -5 99.5467 9.2876 2
 4 4 -5 119.831 13.2892 3
 3 -4 -5 20.4112 6.09115 1
 3 -4 -5 13.4644 5.65287 3
 -3 -4 5 20.2642 5.77909 3
 3 -4 -5 27.9647 6.26176 3
 -3 -4 5 20.7673 5.75874 3
 -3 4 5 26.6419 7.44924 3
 3 4 -5 25.3974 6.57339 3
 3 4 -5 42.4421 8.23408 3
 -3 4 5 26.6148 6.3469 3
 3 4 -5 23.4311 5.47566 2
 2 -4 -5 1292.88 34.1265 3
 2 -4 -5 1280.59 34.7486 3
 -2 -4 5 1283.26 34.3722 3
 2 -4 -5 1289.46 34.0872 1
 -2 -4 5 1319.39 35.1081 3
 2 4 -5 1327.32 35.2725 3
 -2 4 5 1297.35 36.3404 3
 -2 4 5 1270.66 34.897 3
 2 4 -5 1265.07 33.1467 2
 2 4 -5 1295.31 36.5669 3
 1 -4 -5 196.504 10.4919 1
 -1 -4 5 215.764 12.5947 3
 1 -4 -5 233.702 12.2317 3
 1 -4 -5 214.26 11.1356 3
 -1 -4 5 204.476 11.4318 3
 -1 4 5 222.481 12.3061 3
 1 4 -5 203.69 14.5341 3
 -1 4 5 242.175 14.1024 3
 1 4 -5 216.857 12.8356 3
 1 4 -5 204.426 10.034 2
 0 -4 5 115.859 8.44887 2
 0 -4 -5 106.548 8.63025 1
 0 -4 -5 119.476 10.7355 3
 0 -4 5 114.548 9.96402 3
 0 -4 5 121.067 10.7903 3
 0 4 -5 116.984 8.64319 2
 0 4 -5 134.142 10.031 3
 0 4 5 139.249 13.1653 3
 0 4 -5 142.113 11.5268 3
 0 4 -5 115.589 5.8911 1
 0 4 5 112.811 10.5156 3
 -1 -4 -5 14.5916 7.79118 3
 1 -4 5 23.2757 6.67368 3
 1 -4 5 14.0581 5.68031 3
 1 -4 5 13.9203 4.7738 2
 -1 -4 -5 13.9979 5.9316 3
 -1 4 -5 15.3103 3.99015 1
 1 4 5 13.0276 7.47753 3
 1 4 5 18.2708 6.25795 3
 -1 4 -5 15.5283 5.90307 3
 -1 4 -5 18.5194 6.72471 3
 2 -4 5 112.701 11.4887 3
 2 -4 5 119.019 8.77247 2
 -2 -4 -5 124.715 13.8223 3
 2 -4 5 111.941 10.255 3
 -2 -4 -5 107.167 10.3971 3
 -2 4 -5 108.902 7.8267 1
 2 4 5 126.8 11.1402 3
 -2 4 -5 117.859 11.9384 3
 -2 4 -5 117.225 10.3012 3
 2 4 5 125.262 13.8309 3
 3 -4 5 560.133 20.2995 3
 3 -4 5 555.263 19.351 3
 -3 -4 -5 546.975 22.1156 3
 3 -4 5 572.062 17.5085 2
 -3 -4 -5 557.907 19.6368 3
 3 4 5 569.575 22.6328 3
 -3 4 -5 575.878 17.6396 1
 -3 4 -5 550.65 19.1238 3
 -3 4 -5 530.644 20.6411 3
 3 4 5 548.828 19.8823 3
 4 -4 5 588.198 20.7045 3
 -4 -4 -5 604.389 23.4024 3
 4 -4 5 615.397 18.8944 2
 -4 -4 -5 617.521 21.2321 3
 4 -4 5 597.453 21.8405 3
 -4 4 -5 606.232 20.7804 3
 -4 4 -5 623.134 19.5646 1
 4 4 5 614.978 23.4269 3
 4 4 5 609.931 21.4285 3
 -4 4 -5 596.458 21.8056 3
 5 -4 5 83.4123 11.2956 3
 5 -4 5 75.8661 9.85171 2
 -5 -4 -5 95.6268 11.729 3
 -5 -4 -5 96.6521 11.7044 3
 5 -4 5 93.5064 10.0928 3
 -5 4 -5 103.909 11.7955 3
 5 4 5 93.4054 11.19 3
 -5 4 -5 99.5263 13.2842 3
 5 4 5 98.8522 12.3995 3
 -5 4 -5 87.2461 10.3982 1
 -6 -4 -5 133.307 13.367 3
 6 -4 5 133.02 13.8038 3
 6 -4 5 112.681 12.5643 3
 -6 -4 -5 124.935 12.9565 3
 6 4 5 102.042 12.9764 3
 6 4 5 121.394 16.6381 3
 -6 4 -5 114.504 14.2892 3
 -6 4 -5 115.885 12.405 3
 -6 4 -5 141.583 12.1432 1
 -7 -4 -5 33.9986 8.60477 3
 -7 -4 -5 30.7257 10.594 3
 7 -4 5 42.9906 9.69832 3
 7 -4 5 30.656 8.07271 3
 7 4 5 35.8236 8.77637 3
 7 4 5 33.3667 10.7337 3
 -7 4 -5 39.5273 7.97839 1
 -7 4 -5 47.8857 9.85252 3
 -7 4 -5 41.5542 8.34747 3
 8 -4 5 39.9572 10.6397 3
 -8 -4 -5 48.787 11.6753 3
 8 -4 5 46.963 9.2748 3
 -8 -4 -5 56.3745 9.58292 3
 -8 4 -5 62.8756 9.81773 3
 8 4 5 56.2888 10.6859 3
 8 4 5 64.2468 12.0009 3
 -8 4 -5 57.7419 11.106 3
 -8 4 -5 61.4225 9.75363 1
 -9 -4 -5 110.341 15.1259 3
 -9 -4 -5 152.286 20.5368 3
 9 -4 5 92.455 12.653 3
 9 -4 5 96.2458 12.1707 3
 9 4 5 125.948 15.0185 3
 -9 4 -5 105.695 14.8491 1
 -9 4 -5 96.8275 13.8287 3
 -9 4 -5 73.6183 16.8674 3
 9 4 5 92.3826 12.2557 3
 10 -4 5 63.3058 12.5915 3
 10 -4 5 45.1721 10.9416 3
 -10 -4 -5 45.9629 13.091 3
 -10 -4 -5 53.6645 10.552 3
 10 4 5 19.2436 12.4867 3
 -10 4 -5 43.6945 10.7115 1
 -10 4 -5 38.8461 12.5454 3
 10 4 5 40.2922 16.5136 3
 -10 4 -5 57.2318 10.4249 3
 -11 -4 -5 2.79801 10.7257 3
 11 -4 5 29.1643 12.4966 3
 11 -4 5 19.2565 11.339 3
 -11 -4 -5 27.7669 13.2345 3
 -11 4 -5 -2.6849 12.8833 3
 -11 4 -5 26.6554 10.5009 1
 11 4 5 30.0605 11.1494 3
 11 4 5 21.9853 12.7752 3
 -11 4 -5 9.12127 10.9086 3
 12 -4 5 117.675 16.0529 3
 12 -4 5 82.4672 14.3822 3
 -12 -4 -5 77.2565 17.5613 3
 -12 -4 -5 74 13.2138 3
 -12 4 -5 99.2824 16.041 3
 12 4 5 80.0318 16.8552 3
 -12 4 -5 79.1127 13.3021 1
 12 4 5 84.663 14.096 3
 -12 4 -5 66.286 13.0841 3
 13 -4 5 15.3054 14.898 3
 -13 -4 -5 -0.3134 12.9366 3
 -13 -4 -5 24.0526 17.2693 3
 13 -4 5 -11.254 12.4442 3
 -13 4 -5 -16.276 15.4084 3
 -13 4 -5 13.8982 13.276 3
 13 4 5 6.98438 12.4737 3
 -13 4 -5 6.33673 11.3898 1
 13 4 5 -10.675 14.7688 3
 -14 -4 -5 33.6528 15.2348 3
 14 -4 5 11.3747 16.2833 3
 -14 -4 -5 43.7157 17.9594 3
 -14 4 -5 16.3438 13.5418 3
 -14 4 -5 40.2137 18.7774 3
 14 4 5 53.8026 20.3021 3
 14 4 5 11.4421 13.4059 3
 -14 4 -5 48.5069 14.1611 1
 -14 -5 5 23.3132 18.1429 3
 14 -5 -5 30.5366 14.3821 3
 -14 -5 5 2.78612 8.58513 1
 14 -5 -5 18.3966 12.972 3
 14 5 -5 16.9227 16.4673 3
 14 5 -5 32.0908 13.5048 3
 -14 5 5 17.5965 14.6792 1
 -14 5 5 11.2523 12.2292 3
 -14 5 5 10.9666 15.2115 3
 -13 -5 5 2.58823 11.7577 3
 -13 -5 5 29.2414 16.4995 3
 13 -5 -5 13.1384 11.5812 3
 -13 -5 5 3.90442 7.33128 1
 13 -5 -5 -1.3023 13.1221 3
 -13 5 5 17.5189 10.6603 3
 13 5 -5 19.4653 11.9611 3
 -13 5 5 3.94155 13.58 3
 13 5 -5 -28.034 14.7427 3
 -13 5 5 7.99928 13.0442 1
 -12 -5 5 32.6583 10.7651 3
 12 -5 -5 1.72011 10.3371 3
 -12 -5 5 12.0836 15.3255 3
 12 -5 -5 33.9506 12.7814 3
 -12 -5 5 22.2624 6.76164 1
 -12 5 5 24.2017 12.4152 1
 -12 5 5 4.76701 11.9764 3
 -12 5 5 -2.5561 9.67465 3
 12 5 -5 26.6465 14.9218 3
 12 5 -5 18.8583 10.6286 3
 -11 -5 5 8.65319 5.9671 1
 11 -5 -5 -8.5625 10.2246 3
 11 -5 -5 17.0416 9.43703 3
 -11 -5 5 20.2579 9.54005 3
 -11 -5 5 8.5076 13.0222 3
 -11 5 5 1.78481 10.9818 3
 -11 5 5 13.4825 9.16708 3
 11 5 -5 -4.978 9.78605 3
 -11 5 5 0.61893 11.1236 1
 11 5 -5 6.59037 14.0719 3
 -10 -5 5 36.74 12.9738 3
 -10 -5 5 55.7642 6.08415 1
 10 -5 -5 47.6797 9.57262 3
 10 -5 -5 49.7055 10.8648 3
 -10 -5 5 51.2202 10.2478 3
 10 5 -5 55.7593 10.9483 3
 -10 5 5 38.0748 11.8217 3
 10 5 -5 50.4371 13.5591 3
 -10 5 5 45.2755 11.5612 1
 -9 -5 5 -0.8724 11.0956 3
 9 -5 -5 21.0595 8.72789 3
 9 -5 -5 17.7248 9.22081 3
 -9 -5 5 19.4217 9.0431 3
 -9 -5 5 6.45406 4.40629 1
 -9 5 5 5.60952 9.35604 3
 9 5 -5 3.69647 11.3614 3
 -9 5 5 9.90601 7.91936 3
 -9 5 5 9.73512 9.08973 1
 9 5 -5 8.11226 8.8338 3
 8 -5 -5 122.969 16.1446 1
 -8 -5 5 114.108 6.76471 1
 -8 -5 5 143.257 19.1618 3
 -8 -5 5 127.697 14.7194 3
 8 -5 -5 110.138 13.9676 3
 8 -5 -5 125.101 14.6573 3
 8 5 -5 122.428 12.0365 3
 -8 5 5 99.5086 12.995 3
 8 5 -5 156.991 18.9419 3
 -8 5 5 132.837 15.052 3
 -8 5 5 132.757 14.8572 1
 -7 -5 5 180.438 14.7607 3
 7 -5 -5 128.536 14.5033 3
 7 -5 -5 133.371 17.7846 3
 7 -5 -5 168.316 15.8201 1
 7 5 -5 177.293 15.4751 3
 -7 5 5 149.154 15.4636 3
 -7 5 5 153.161 13.4807 3
 7 5 -5 187.235 19.8089 3
 -7 5 5 161.584 14.9735 1
 6 -5 -5 307.229 16.7484 1
 -6 -5 5 292.39 15.89 3
 -6 -5 5 282.923 14.8964 3
 6 -5 -5 301.474 16.4006 3
 6 -5 -5 298.765 15.7314 3
 -6 5 5 284.123 17.2664 3
 6 5 -5 294.778 15.0698 2
 -6 5 5 290.664 16.8049 3
 6 5 -5 307.116 20.3047 3
 6 5 -5 298.14 17.256 3
 -6 5 5 302.623 16.0621 1
 5 -5 -5 11.6907 7.37199 1
 -5 -5 5 -3.5529 6.70193 3
 -5 -5 5 1.87712 6.67676 3
 5 -5 -5 3.16119 7.43885 3
 5 -5 -5 -0.2746 6.72438 3
 -5 5 5 5.83398 8.9296 3
 5 5 -5 8.17072 6.20219 2
 -5 5 5 3.31972 7.7708 3
 5 5 -5 12.4807 9.60524 3
 5 5 -5 -3.7946 7.0409 3
 -5 5 5 8.93506 7.16816 1
 -4 -5 5 41.001 7.83481 3
 -4 -5 5 42.877 7.72173 3
 4 -5 -5 34.7131 7.20489 3
 4 -5 -5 24.3838 8.07661 3
 4 -5 -5 46.3835 7.71604 1
 4 5 -5 42.8505 9.99243 3
 4 5 -5 37.4173 6.85148 2
 4 5 -5 30.1277 8.21694 3
 -4 5 5 34.4466 9.41586 3
 -4 5 5 37.8596 8.13309 3
 3 -5 -5 24.5053 6.81399 3
 -3 -5 5 26.2603 6.98213 3
 3 -5 -5 34.7305 7.51705 3
 -3 -5 5 14.4838 6.49781 3
 3 -5 -5 24.2571 6.8825 1
 -3 5 5 35.5747 7.92858 3
 3 5 -5 18.6934 8.07471 3
 3 5 -5 12.6004 5.93998 2
 -3 5 5 25.0065 9.12464 3
 3 5 -5 25.6683 9.60163 3
 -2 -5 5 -5.1906 6.16208 3
 2 -5 -5 10.4565 5.91974 1
 2 -5 -5 9.91366 6.56346 3
 2 -5 -5 13.5037 6.32995 3
 -2 -5 5 2.23817 6.61542 3
 2 5 -5 9.19638 5.32782 2
 2 5 -5 1.10985 8.45706 3
 -2 5 5 6.33485 8.10547 3
 -2 5 5 7.15906 6.75153 3
 2 5 -5 9.32708 7.17552 3
 1 -5 -5 -7.0631 5.3005 1
 -1 -5 5 -0.2395 6.62614 3
 1 -5 -5 -1.1902 6.08186 3
 -1 -5 5 -12.051 5.85781 3
 1 -5 -5 7.52215 5.89746 3
 1 5 -5 0.80587 7.02724 3
 1 5 -5 1.92715 8.41937 3
 -1 5 5 0.01246 8.50306 3
 -1 5 5 -4.4685 6.12103 3
 1 5 -5 0.23393 5.37091 2
 0 -5 -5 3.85846 5.955 3
 0 -5 -5 -1.0905 5.11074 1
 0 -5 5 -2.9042 6.51827 3
 0 -5 5 6.6973 6.3339 3
 0 -5 -5 4.68463 6.67184 3
 0 5 5 3.28807 8.25789 3
 0 5 -5 3.04112 7.08827 3
 0 5 -5 2.48181 5.28123 2
 0 5 -5 -4.9215 8.54383 3
 0 5 5 0.56824 6.67957 3
 1 -5 5 184.647 10.1916 2
 1 -5 5 181.77 13.7522 3
 -1 -5 -5 167.759 10.6147 1
 1 -5 5 180.048 13.0286 3
 -1 -5 -5 174.432 13.4713 3
 -1 5 -5 178.094 8.459 1
 1 5 5 160.055 13.6369 3
 -1 5 -5 184.874 12.4287 3
 1 5 5 175.021 16.6058 3
 -1 5 -5 173.554 14.7789 3
 2 -5 5 71.0138 8.67995 3
 -2 -5 -5 86.3462 11.5067 3
 2 -5 5 83.6317 9.86691 3
 2 -5 5 80.6952 8.83638 2
 -2 -5 -5 73.5792 9.01427 3
 2 5 5 79.5292 11.5209 3
 -2 5 -5 86.4962 9.79548 3
 -2 5 -5 62.1182 7.77777 1
 -2 5 -5 77.288 8.73231 3
 2 5 5 73.3684 9.45811 3
 3 -5 5 13.7486 7.2584 3
 3 -5 5 4.6856 5.84485 2
 -3 -5 -5 -0.3441 6.44622 3
 3 -5 5 10.5257 6.97273 3
 -3 -5 -5 -3.6578 9.13772 3
 -3 5 -5 10.4812 5.52196 1
 -3 5 -5 3.19966 7.97511 3
 3 5 5 10.6403 9.58945 3
 -3 5 -5 15.9108 7.26239 3
 3 5 5 3.61061 7.75513 3
 4 -5 5 56.4524 7.1213 2
 4 -5 5 60.498 9.07318 3
 -4 -5 -5 55.8972 8.77959 3
 4 -5 5 62.1562 10.0265 3
 -4 -5 -5 65.7827 12.2269 3
 -4 5 -5 55.9176 10.0613 3
 -4 5 -5 52.4628 7.35757 1
 -4 5 -5 68.4258 8.82404 3
 4 5 5 65.2431 11.2459 3
 4 5 5 55.1389 9.3909 3
 -5 -5 -5 19.0311 10.9339 3
 5 -5 5 3.52843 8.42264 3
 5 -5 5 -9.6259 7.27417 3
 -5 -5 -5 -1.4387 7.44791 3
 5 -5 5 3.45256 6.34461 2
 -5 5 -5 -4.0138 8.38799 3
 -5 5 -5 1.08435 7.29463 3
 -5 5 -5 -0.4 6.1605 1
 5 5 5 -1.9466 7.67683 3
 5 5 5 -3.3297 9.34068 3
 -6 -5 -5 37.6204 9.39749 3
 6 -5 5 39.602 9.3372 3
 -6 -5 -5 25.7383 11.605 3
 6 -5 5 35.9536 10.3607 3
 6 -5 5 43.468 8.03002 2
 -6 5 -5 32.3976 8.6572 3
 6 5 5 35.9152 9.70871 3
 -6 5 -5 46.2894 10.3378 3
 -6 5 -5 44.6895 8.36034 1
 6 5 5 33.8241 11.699 3
 7 -5 5 3.6498 8.83691 3
 -7 -5 -5 7.78976 10.0001 3
 7 -5 5 5.34598 9.70516 3
 7 -5 5 3.79456 7.81147 2
 -7 -5 -5 12.6102 8.83255 3
 7 5 5 7.59451 8.65572 3
 -7 5 -5 15.6186 10.0871 3
 7 5 5 -2.4102 11.6212 3
 -7 5 -5 -0.5399 7.40686 1
 -7 5 -5 0.20513 8.27347 3
 -8 -5 -5 -3.7505 11.9771 3
 -8 -5 -5 -0.6584 8.66843 3
 8 -5 5 3.32616 10.3074 3
 8 -5 5 -7.0715 8.59823 3
 -8 5 -5 15.4894 10.9871 3
 8 5 5 -6.1082 9.56274 3
 8 5 5 -4.8007 12.3786 3
 -8 5 -5 0.1972 13.8895 1
 -8 5 -5 3.71362 9.21808 3
 9 -5 5 -19.839 9.35865 3
 -9 -5 -5 -7.4462 8.99555 3
 9 -5 5 0.67249 10.4074 3
 -9 -5 -5 5.0091 12.7232 3
 9 5 5 9.11348 12.8892 3
 -9 5 -5 12.0341 9.21489 1
 -9 5 -5 23.6129 10.3219 3
 9 5 5 6.36127 11.8029 3
 -9 5 -5 3.5318 11.5353 3
 10 -5 5 -8.3751 11.2619 3
 -10 -5 -5 19.4684 13.9438 3
 10 -5 5 3.61218 10.2902 3
 -10 -5 -5 16.5686 10.7438 3
 -10 5 -5 16.6599 10.0323 3
 10 5 5 12.4701 13.6361 3
 10 5 5 6.33306 11.1095 3
 -10 5 -5 -11.587 12.3569 3
 -10 5 -5 4.03935 9.48513 1
 11 -5 5 13.2865 12.8478 3
 -11 -5 -5 8.6039 15.7145 3
 11 -5 5 11.8226 11.9927 3
 -11 -5 -5 8.03059 11.4035 3
 11 5 5 2.65908 11.9769 3
 11 5 5 -14.522 15.0006 3
 -11 5 -5 11.2335 10.5836 1
 -11 5 -5 3.77649 13.2856 3
 -11 5 -5 18.6418 11.7361 3
 12 -5 5 21.4997 15.3249 3
 -12 -5 -5 16.9952 17.374 3
 12 -5 5 10.6127 12.9434 3
 -12 -5 -5 -9.3814 11.4567 3
 12 5 5 19.4711 13.0841 3
 12 5 5 31.6184 15.1112 3
 -12 5 -5 5.11609 11.0935 1
 -12 5 -5 -7.7685 11.7747 3
 -12 5 -5 1.5181 14.8974 3
 13 -5 5 4.11806 16.5283 3
 13 -5 5 27.6253 14.1066 3
 -13 -5 -5 2.3414 19.1141 3
 -13 -5 -5 31.145 14.413 3
 -13 5 -5 -18.191 16.367 3
 13 5 5 11.6268 19.1391 3
 -13 5 -5 -9.4324 14.4748 3
 -13 5 -5 21.4953 12.9525 1
 13 5 5 18.7715 14.778 3
 13 -6 -5 -2.4069 13.4189 3
 -13 -6 5 21.4838 15.9116 3
 13 -6 -5 36.4722 15.791 3
 13 6 -5 25.1166 18.4798 3
 13 6 -5 9.03227 14.1306 3
 -12 -6 5 -15.482 16.3251 3
 12 -6 -5 19.7875 13.6534 3
 -12 -6 5 13.3437 6.29844 1
 12 -6 -5 9.89924 11.6403 3
 -12 -6 5 10.5976 11.3386 3
 12 6 -5 23.9727 12.7214 3
 -12 6 5 12.4523 13.3112 1
 -12 6 5 26.5961 12.1736 3
 -12 6 5 18.9627 15.5912 3
 12 6 -5 17.1169 18.0101 3
 11 -6 -5 3.51962 12.0124 3
 11 -6 -5 4.64221 10.3558 3
 -11 -6 5 34.7417 16.9267 3
 -11 -6 5 1.67305 10.3352 3
 -11 6 5 2.05265 13.0416 3
 11 6 -5 8.13999 15.7998 3
 -11 6 5 -2.4085 10.341 3
 11 6 -5 27.1674 11.5436 3
 -11 6 5 12.1238 11.7772 1
 10 -6 -5 26.8861 11.1241 3
 -10 -6 5 37.9659 15.8137 3
 10 -6 -5 27.1135 11.5981 3
 -10 -6 5 14.1473 10.169 3
 -10 6 5 34.2069 10.3033 3
 10 6 -5 38.5089 14.0359 3
 10 6 -5 30.0294 11.9196 3
 -10 6 5 23.1658 11.5513 3
 -10 6 5 28.835 11.3339 1
 -9 -6 5 29.4122 10.4322 3
 9 -6 -5 -1.641 10.8352 3
 9 -6 -5 18.7324 10.4919 3
 -9 6 5 34.4041 9.37534 3
 -9 6 5 16.8333 11.2917 3
 -9 6 5 35.9716 11.1338 1
 9 6 -5 19.9027 14.2258 3
 9 6 -5 16.3937 10.8304 3
 9 6 -5 28.642 9.4455 2
 8 -6 -5 27.1007 9.63905 3
 8 -6 -5 11.4267 9.72885 3
 -8 -6 5 3.29034 9.55059 3
 -8 6 5 -3.5392 10.7652 3
 8 6 -5 8.68191 9.65235 3
 8 6 -5 3.36719 8.56184 2
 8 6 -5 8.64977 13.0006 3
 -8 6 5 -3.1825 8.93344 1
 -8 6 5 37.8992 9.13299 3
 -7 -6 5 148.559 15.6384 3
 7 -6 -5 157.253 16.0882 3
 -7 -6 5 155.111 16.5015 3
 7 -6 -5 154.617 16.7087 3
 7 -6 -5 183.077 17.1113 1
 -7 6 5 138.838 17.9166 3
 -7 6 5 160.297 16.0258 1
 7 6 -5 143.105 17.18 3
 7 6 -5 151.273 14.3016 2
 7 6 -5 153.607 16.614 3
 6 -6 -5 124.381 19.9662 1
 -6 -6 5 168.361 15.6738 3
 -6 -6 5 131.417 15.5058 3
 6 -6 -5 153.122 15.1866 3
 6 -6 -5 133.165 15.8353 3
 6 6 -5 163.771 20.5859 3
 -6 6 5 166.996 17.4908 3
 -6 6 5 132.596 14.9557 3
 6 6 -5 117.433 13.6605 2
 6 6 -5 144.889 16.6536 3
 -5 -6 5 411.368 19.7191 3
 5 -6 -5 396.788 19.6956 3
 5 -6 -5 423.84 19.3702 1
 5 -6 -5 418.031 20.9858 3
 -5 -6 5 416.662 20.4191 3
 5 6 -5 401.097 24.3316 3
 -5 6 5 409.924 23.7476 3
 5 6 -5 412.527 17.3998 2
 -5 6 5 386.906 21.3627 3
 5 6 -5 354.976 31.3761 3
 4 -6 -5 221.169 14.9392 1
 -4 -6 5 221.639 25.1909 3
 -4 -6 5 235.028 15.7234 3
 4 -6 -5 225.239 17.2177 3
 4 -6 -5 263.429 17.4389 3
 4 6 -5 224.834 20.5109 3
 -4 6 5 244.427 18.276 3
 -4 6 5 246.238 19.7571 3
 4 6 -5 227.741 13.839 2
 4 6 -5 231.41 17.7476 3
 3 -6 -5 140.557 15.2557 3
 -3 -6 5 120.949 14.0789 3
 3 -6 -5 150.524 14.4162 3
 3 -6 -5 146.796 12.9177 1
 -3 -6 5 128.721 15.1107 3
 3 6 -5 140.687 11.6893 2
 3 6 -5 144.858 15.9208 3
 3 6 -5 156.653 19.2867 3
 -3 6 5 153.498 15.2227 3
 -2 -6 5 15.5099 8.34263 3
 -2 -6 5 26.2472 8.02705 3
 2 -6 -5 13.9348 8.19513 3
 2 -6 -5 21.5654 8.23925 3
 2 -6 -5 10.7484 7.25465 1
 2 6 -5 4.12845 11.013 3
 -2 6 5 17.9533 10.8181 3
 -2 6 5 17.3607 8.64068 3
 2 6 -5 13.2196 8.66457 3
 2 6 -5 14.4283 6.84178 2
 1 -6 -5 227.709 13.5086 1
 -1 -6 5 233.146 16.3098 3
 -1 -6 5 235.569 15.4668 3
 1 -6 -5 235.82 15.509 3
 1 -6 -5 220.51 16.3608 3
 1 6 -5 239.143 17.6697 3
 -1 6 5 240.395 16.8461 3
 1 6 -5 226.974 19.7282 3
 1 6 -5 228.126 12.8185 2
 -1 6 5 241.15 19.5108 3
 0 -6 -5 3.62591 8.12174 3
 0 -6 -5 8.33797 6.8049 1
 0 -6 -5 14.6586 7.82328 3
 0 -6 5 14.0659 7.97105 3
 0 -6 5 3.8065 8.47232 3
 0 6 5 25.3282 10.8289 3
 0 6 5 12.8657 8.28808 3
 0 6 -5 4.18918 6.2541 2
 0 6 -5 14.4015 10.8957 3
 0 6 -5 14.9164 8.71455 3
 -1 -6 -5 102.392 10.6132 1
 -1 -6 -5 108.766 13.6429 3
 1 -6 5 99.5223 11.1079 3
 -1 -6 -5 115.371 14.7544 3
 1 -6 5 104.81 11.5994 3
 -1 6 -5 92.3152 13.3017 3
 1 6 5 117.941 14.4817 3
 -1 6 -5 107.504 12.0436 3
 1 6 5 102.375 13.4275 3
 2 -6 5 27.4872 6.31773 2
 -2 -6 -5 24.7776 8.41211 3
 -2 -6 -5 31.6133 8.73082 3
 2 -6 5 33.7322 9.99651 3
 2 -6 5 31.7767 8.82151 3
 -2 -6 -5 20.4424 6.54731 1
 2 6 5 32.1918 11.5766 3
 2 6 5 22.1839 8.58963 3
 -2 6 -5 27.0056 6.03466 1
 -2 6 -5 18.5708 9.88088 3
 -2 6 -5 28.774 8.92227 3
 -3 -6 -5 45.2652 13.3891 3
 3 -6 5 55.4965 10.827 3
 3 -6 5 54.0722 10.0491 3
 -3 -6 -5 69.045 11.1595 3
 -3 -6 -5 51.9061 7.42018 1
 3 -6 5 51.3073 7.11079 2
 3 6 5 69.7369 13.101 3
 3 6 5 61.5021 10.869 3
 -3 6 -5 58.7694 10.1502 3
 -3 6 -5 65.2112 11.2781 3
 -3 6 -5 58.9466 7.55416 1
 4 -6 5 94.6728 10.9985 2
 4 -6 5 80.3242 10.981 3
 4 -6 5 88.4379 11.7513 3
 -4 -6 -5 75.3814 11.0129 3
 -4 -6 -5 65.0779 12.4544 3
 4 6 5 83.9889 11.847 3
 4 6 5 85.1493 14.1086 3
 -4 6 -5 84.3472 11.0059 1
 -4 6 -5 76.526 10.9136 3
 -4 6 -5 86.4356 11.826 3
 5 -6 5 12.7599 9.47642 3
 -5 -6 -5 8.50885 9.13654 3
 5 -6 5 20.525 9.8573 3
 5 -6 5 14.8988 6.82983 2
 -5 -6 -5 2.31795 12.7446 3
 -5 6 -5 21.1776 7.67222 1
 -5 6 -5 -11.747 9.60936 3
 -5 6 -5 -2.4407 9.30028 3
 5 6 5 21.8634 12.3508 3
 5 6 5 6.93493 9.5499 3
 -6 -6 -5 109.176 16.3129 3
 6 -6 5 91.8975 12.8109 2
 6 -6 5 77.1719 11.765 3
 -6 -6 -5 104.819 12.8737 3
 6 -6 5 87.1368 12.8732 3
 -6 6 -5 88.4902 16.8023 3
 6 6 5 91.5399 15.7194 3
 -6 6 -5 93.3891 13.7984 1
 6 6 5 100.824 13.0033 3
 -6 6 -5 132.382 18.3019 3
 -7 -6 -5 2.95639 11.1552 3
 7 -6 5 6.50355 8.38033 2
 -7 -6 -5 -3.9477 14.2789 3
 7 -6 5 5.15581 11.488 3
 7 -6 5 -4.201 9.78973 3
 -7 6 -5 4.82653 9.50645 3
 -7 6 -5 -21.289 10.4173 3
 7 6 5 4.04416 12.3647 3
 7 6 5 -1.5717 10.2949 3
 -7 6 -5 -0.6762 10.5037 1
 -8 -6 -5 94.3018 13.1937 3
 -8 -6 -5 85.0807 15.4668 3
 8 -6 5 114.694 14.9609 2
 8 -6 5 89.9254 13.7535 3
 8 -6 5 76.1539 13.0168 3
 -8 6 -5 106.989 13.9386 3
 -8 6 -5 111.897 15.1034 3
 -8 6 -5 97.6746 12.1397 1
 8 6 5 95.8365 14.1387 3
 8 6 5 71.2483 16.5096 3
 9 -6 5 10.7071 11.019 3
 9 -6 5 19.8209 12.9205 3
 -9 -6 -5 12.4542 11.6663 3
 9 -6 5 21.9721 9.37167 2
 9 6 5 26.3982 12.8977 3
 9 6 5 10.212 15.8386 3
 -9 6 -5 6.05639 13.8041 3
 -9 6 -5 28.3654 10.7597 1
 -9 6 -5 -3.3753 11.4194 3
 10 -6 5 120.493 15.8771 3
 -10 -6 -5 96.0622 19.3406 3
 -10 -6 -5 100.463 14.8713 3
 10 -6 5 123.252 13.7526 2
 10 -6 5 108.154 17.2764 3
 10 6 5 101.804 19.5624 3
 10 6 5 107.071 15.7911 3
 -10 6 -5 139.251 19.6373 1
 -10 6 -5 79.8963 14.8243 3
 -10 6 -5 89.4473 16.8104 3
 -11 -6 -5 30.1738 13.1669 3
 11 -6 5 -4.3277 15.7968 3
 -11 -6 -5 -11.574 18.3869 3
 11 -6 5 30.2112 13.98 3
 11 -6 5 9.482 13.3857 2
 11 6 5 5.57767 14.6481 3
 -11 6 -5 23.714 12.4853 1
 11 6 5 63.5832 25.0034 3
 -11 6 -5 3.27352 16.2424 3
 -11 6 -5 40.438 14.0406 3
 12 -6 5 30.9913 18.0757 3
 12 -6 5 56.9581 15.757 3
 -12 -6 -5 20.102 20.9199 3
 -12 -6 -5 35.6492 15.6315 3
 -12 6 -5 58.6142 15.9175 3
 12 6 5 4.79739 15.6591 3
 -12 6 -5 27.2769 14.2168 1
 -12 6 -5 28.7086 17.4418 3
 12 6 5 4.3325 20.1282 3
 -11 -7 5 0.55819 14.1163 3
 11 -7 -5 2.15922 14.7152 3
 11 -7 -5 -5.4507 14.7528 3
 -11 -7 5 -31.232 13.1352 3
 11 7 -5 20.5092 13.0006 2
 -11 7 5 23.5128 14.1037 3
 11 7 -5 -27.534 18.732 3
 -11 7 5 -28.846 13.616 1
 11 7 -5 -18.952 14.7765 3
 -11 7 5 -25.89 14.6937 3
 -10 -7 5 -8.1367 11.7874 3
 -10 -7 5 -4.5048 12.0335 3
 10 -7 -5 34.0149 13.4176 3
 10 -7 -5 9.63821 12.4417 3
 -10 7 5 -26.059 12.7572 1
 10 7 -5 19.34 12.2786 2
 -10 7 5 -8.0582 13.4551 3
 10 7 -5 23.4903 14.2281 3
 10 7 -5 -7.6753 17.255 3
 9 -7 -5 29.799 13.0221 3
 -9 -7 5 37.5084 12.9579 3
 9 -7 -5 22.5168 11.8713 3
 -9 -7 5 40.1457 12.8622 3
 9 7 -5 55.8672 17.019 3
 9 7 -5 5.76448 12.3826 3
 -9 7 5 28.2852 13.1205 1
 -9 7 5 41.5849 14.3839 3
 9 7 -5 21.0793 11.3941 2
 8 -7 -5 -10.837 10.4246 3
 -8 -7 5 -8.4022 11.0585 3
 -8 -7 5 -20.333 10.3284 3
 8 -7 -5 13.5703 12.2036 3
 8 7 -5 22.9109 16.0533 3
 8 7 -5 -7.0107 9.80581 2
 -8 7 5 -11.16 11.5478 3
 -8 7 5 10.0378 14.1303 3
 8 7 -5 -9.2239 11.0332 3
 -8 7 5 -1.8625 11.1894 1
 -7 -7 5 17.2814 10.2115 3
 7 -7 -5 12.5447 11.8772 3
 -7 -7 5 10.4345 11.1425 3
 7 -7 -5 19.2469 11.3381 3
 7 -7 -5 36.9062 11.2626 1
 -7 7 5 9.60353 13.9105 3
 7 7 -5 18.2255 11.8193 3
 7 7 -5 23.3251 9.6541 2
 7 7 -5 0.99934 14.645 3
 -7 7 5 2.21298 12.127 3
 6 -7 -5 88.3174 13.0662 1
 -6 -7 5 127.455 17.3532 3
 -6 -7 5 90.6733 13.1498 3
 6 -7 -5 78.8485 12.478 3
 6 -7 -5 102.142 13.5198 3
 -6 7 5 74.4679 15.6196 3
 -6 7 5 83.0354 14.0438 3
 6 7 -5 90.4156 13.687 3
 6 7 -5 93.4592 12.7949 2
 6 7 -5 90.3869 16.6571 3
 -5 -7 5 18.75 9.93078 3
 5 -7 -5 -3.5369 9.43062 1
 5 -7 -5 -2.4211 10.1188 3
 -5 -7 5 -1.3797 9.88868 3
 5 -7 -5 -5.8411 9.74195 3
 -5 7 5 -10.02 10.7851 3
 -5 7 5 -4.5987 12.6302 3
 5 7 -5 16.8801 10.6764 3
 5 7 -5 3.98403 8.21732 2
 4 -7 -5 322.327 21.3056 3
 -4 -7 5 348.219 21.3828 3
 4 -7 -5 343.438 20.2666 3
 4 -7 -5 312.406 18.3511 1
 -4 -7 5 332.19 20.5351 3
 4 7 -5 295.539 16.1868 2
 4 7 -5 308.39 21.6986 3
 -4 7 5 327.225 21.8712 3
 -4 7 5 301.75 24.9831 3
 4 7 -5 326.33 24.9579 3
 3 -7 -5 2.57722 10.3043 3
 -3 -7 5 3.27295 9.43894 3
 -3 -7 5 7.80742 9.47561 3
 3 -7 -5 -4.4702 8.06591 1
 3 -7 -5 -2.953 8.93923 3
 3 7 -5 -8.8266 12.4199 3
 3 7 -5 -11.946 10.0951 3
 3 7 -5 1.06268 7.6792 2
 -3 7 5 -13.725 12.5501 3
 -3 7 5 5.50077 10.1731 3
 -2 -7 5 240.252 18.513 3
 2 -7 -5 233.691 17.5178 3
 -2 -7 5 222.04 18.7082 3
 2 -7 -5 252.386 15.4834 1
 2 -7 -5 243.586 18.6689 3
 2 7 -5 213.038 24.1803 3
 2 7 -5 214.519 14.204 2
 2 7 -5 219.42 24.2946 3
 -2 7 5 264.862 22.8178 3
 -2 7 5 221.34 19.0949 3
 -1 -7 5 -9.8413 9.5265 3
 1 -7 -5 -4.7684 9.05061 3
 1 -7 -5 -2.4684 8.98618 3
 1 -7 -5 -1.24 7.59145 1
 -1 -7 5 -6.4073 9.71737 3
 -1 7 5 -1.0816 10.1697 3
 1 7 -5 -9.5288 11.0114 3
 -1 7 5 18.1093 12.1191 3
 1 7 -5 7.6372 7.56262 2
 1 7 -5 -29.191 12.3386 3
 0 -7 5 25.0614 9.70283 3
 0 -7 -5 32.7074 10.5717 3
 0 -7 5 11.7051 16.547 3
 0 -7 -5 20.1947 7.99566 1
 0 -7 -5 16.1413 9.72757 3
 0 7 5 40.9851 12.3984 3
 0 7 5 36.1044 11.0939 3
 0 7 -5 4.8315 11.0882 3
 0 7 -5 13.8562 13.3392 3
 1 -7 5 4.96253 9.79666 3
 -1 -7 -5 1.39395 15.9305 3
 -1 -7 -5 -7.7767 6.73823 1
 1 -7 5 6.8775 11.0826 3
 -1 -7 -5 -4.0216 10.1426 3
 1 7 5 9.82976 9.87666 3
 -1 7 -5 13.6992 11.264 3
 1 7 5 -2.5511 12.8904 3
 -1 7 -5 17.3633 13.4139 3
 2 -7 5 44.5401 11.4677 3
 -2 -7 -5 18.3995 15.4469 3
 -2 -7 -5 21.1142 10.6694 3
 -2 -7 -5 31.273 7.84183 1
 2 -7 5 21.2242 9.55126 3
 2 7 5 27.2432 10.7162 3
 2 7 5 32.1588 14.0075 3
 -2 7 -5 46.9391 11.249 3
 -2 7 -5 22.4853 13.8457 3
 3 -7 5 80.5356 8.6166 2
 -3 -7 -5 77.8546 11.4741 1
 3 -7 5 87.0275 13.4775 3
 -3 -7 -5 64.2642 13.3847 3
 -3 -7 -5 73.7542 12.6754 3
 3 -7 5 69.9262 12.3414 3
 -3 7 -5 81.1916 10.7929 1
 -3 7 -5 73.5432 12.7757 3
 3 7 5 91.0561 13.4515 3
 3 7 5 96.8393 16.2118 3
 4 -7 5 21.8384 11.9655 3
 4 -7 5 2.88425 10.3386 3
 -4 -7 -5 0.61342 10.2022 3
 -4 -7 -5 14.6222 7.25916 1
 4 -7 5 12.1461 7.18449 2
 4 7 5 5.3411 10.5003 3
 -4 7 -5 21.3377 10.2545 3
 -4 7 -5 8.25621 11.3977 3
 4 7 5 3.61446 14.3003 3
 4 7 5 18.3872 6.06869 2
 -4 7 -5 -1.6449 7.40424 1
 -5 -7 -5 124.695 20.2296 3
 5 -7 5 138.177 19.1561 3
 -5 -7 -5 110.455 17.9145 3
 5 -7 5 103.198 14.4861 3
 5 -7 5 111.168 12.0334 2
 -5 7 -5 129.866 13.6744 1
 5 7 5 135.948 17.6969 3
 -5 7 -5 117.278 15.7615 3
 -5 7 -5 127.344 14.26 3
 5 7 5 110.119 15.0619 3
 -6 -7 -5 3.91204 11.7709 3
 6 -7 5 5.60672 11.4101 3
 6 -7 5 5.94205 11.7977 3
 6 -7 5 18.6153 8.20984 2
 -6 -7 -5 16.7498 18.9603 3
 6 7 5 10.4391 12.9902 3
 -6 7 -5 -5.4601 12.2432 3
 -6 7 -5 11.3056 9.34364 1
 6 7 5 -24.873 14.587 3
 -6 7 -5 -12.295 10.6286 3
 7 -7 5 134.862 14.7499 2
 7 -7 5 109.144 16.082 3
 -7 -7 -5 97.2507 34.5097 3
 7 -7 5 95.7521 13.9577 3
 -7 -7 -5 129.088 15.8375 3
 -7 7 -5 153.574 16.619 1
 7 7 5 127.979 17.3293 3
 -7 7 -5 127.919 16.4234 3
 7 7 5 116.457 16.1123 3
 -7 7 -5 135.149 14.8889 3
 8 -7 5 23.4548 14.2022 3
 -8 -7 -5 -6.8995 12.3122 3
 8 -7 5 38.3946 13.4692 3
 -8 -7 -5 28.161 18.924 3
 8 -7 5 25.298 9.84477 2
 -8 7 -5 6.26283 11.0195 1
 -8 7 -5 -12.158 12.774 3
 8 7 5 24.1177 15.762 3
 -8 7 -5 40.7512 14.8637 3
 8 7 5 11.8796 13.28 3
 -9 -7 -5 115.457 19.251 3
 9 -7 5 137.778 17.9073 2
 9 -7 5 119.034 16.1752 3
 -9 -7 -5 130.913 17.5541 3
 -9 7 -5 172.477 21.7406 3
 9 7 5 124.014 18.9513 3
 -9 7 -5 134.319 15.5443 1
 9 7 5 148.987 21.6704 3
 -9 7 -5 117.002 19.3969 3
 -10 -7 -5 28.9648 20.2183 3
 10 -7 5 25.8404 14.9109 3
 -10 -7 -5 -23.854 13.2756 3
 10 -7 5 21.0936 12.0268 2
 10 -7 5 4.7429 17.8253 3
 -10 7 -5 -21.647 11.728 1
 10 7 5 43.359 16.3527 3
 10 7 5 11.9229 19.8007 3
 -10 7 -5 -8.9125 16.6438 3
 8 -8 -5 24.2467 14.8697 3
 -8 -8 5 -22.315 13.234 3
 -8 -8 5 -3.9843 14.0074 3
 8 -8 -5 -3.5483 13.8397 3
 -8 8 5 -21.52 15.9138 3
 8 8 -5 25.2836 20.0526 3
 8 8 -5 -0.1898 14.1093 3
 8 8 -5 4.91768 11.3261 2
 -8 8 5 6.24941 18.3624 3
 7 -8 -5 -13.575 13.4539 3
 -7 -8 5 3.32288 12.4225 3
 -7 -8 5 7.53993 12.5964 3
 7 -8 -5 11.3739 14.3887 3
 7 8 -5 12.1937 11.0971 2
 7 8 -5 -3.4813 13.8325 3
 -7 8 5 6.55986 15.6827 3
 -7 8 5 -11.608 15.8436 3
 7 8 -5 -13.115 19.6839 3
 -6 -8 5 15.1632 13.0573 3
 -6 -8 5 11.2567 12.6222 3
 6 -8 -5 8.82475 12.2769 3
 6 8 -5 4.21811 13.9806 3
 -6 8 5 1.51041 13.7602 3
 6 8 -5 -6.9311 9.99125 2
 6 8 -5 -0.261 18.6485 3
 5 -8 -5 0.58497 11.4889 3
 -5 -8 5 -16.053 12.0988 3
 -5 -8 5 -5.8041 12.1813 3
 5 -8 -5 -4.9739 11.518 3
 5 -8 -5 -21.62 11.3264 1
 -5 8 5 -2.5135 15.7575 3
 5 8 -5 -23.743 15.9641 3
 5 8 -5 30.773 14.0047 3
 -5 8 5 13.0403 14.1243 3
 4 -8 -5 15.119 11.5205 1
 -4 -8 5 35.5354 13.6566 3
 4 -8 -5 2.4586 12.7695 3
 -4 -8 5 42.3365 12.2353 3
 4 -8 -5 11.3991 12.898 3
 4 8 -5 28.7426 10.1522 2
 4 8 -5 12.0849 16.0207 3
 -4 8 5 44.9088 17.0019 3
 -4 8 5 21.6326 13.4363 3
 4 8 -5 9.9973 12.8369 3
 3 -8 -5 9.02931 11.4858 3
 3 -8 -5 -19.025 9.90973 1
 -3 -8 5 -9.929 12.015 3
 3 -8 -5 -10.493 11.5567 3
 -3 -8 5 -12.508 11.8128 3
 -3 8 5 -12.234 15.0579 3
 3 8 -5 12.8986 12.966 3
 3 8 -5 -19.913 8.76789 2
 -3 8 5 -7.9723 12.1561 3
 3 8 -5 -13.095 16.3296 3
 2 -8 -5 -4.4058 11.5633 3
 2 -8 -5 3.91333 9.88405 1
 -2 -8 5 32.4192 12.6244 3
 -2 -8 5 8.27093 11.7469 3
 2 -8 -5 -2.8337 11.9462 3
 2 8 -5 3.87839 8.98993 2
 -2 8 5 6.46819 15.0981 3
 2 8 -5 -9.5851 14.8423 3
 2 8 -5 29.1104 13.2987 3
 -2 8 5 7.26377 12.412 3
 1 -8 -5 36.4382 13.4614 3
 1 -8 -5 30.7739 9.75292 1
 1 -8 -5 44.127 12.323 3
 -1 -8 5 27.2203 12.1432 3
 -1 -8 5 48.6502 12.7407 3
 -1 8 5 34.4832 16.2286 3
 1 8 -5 44.5136 16.5917 3
 1 8 -5 40.9473 13.1271 3
 -1 8 5 17.5404 13.0978 3
 0 -8 -5 113.281 15.4924 3
 0 -8 5 104.138 14.2429 3
 0 -8 5 141.5 16.137 3
 0 -8 -5 136.108 14.5913 1
 0 -8 -5 109.497 14.1248 3
 0 8 -5 118.653 16.3055 3
 0 8 5 89.2986 15.6109 3
 0 8 5 105.801 18.1109 3
 0 8 -5 119.147 24.9723 3
 1 -8 5 12.4292 12.94 3
 -1 -8 -5 7.6712 11.294 3
 1 -8 5 8.26195 14.8241 3
 -1 -8 -5 13.348 8.6524 1
 -1 -8 -5 24.7664 11.7213 3
 -1 8 -5 -1.6536 13.0481 3
 1 8 5 17.3966 12.6396 3
 1 8 5 15.7053 15.1821 3
 -1 8 -5 -17.167 15.5554 3
 2 -8 5 44.0037 12.2201 3
 -2 -8 -5 53.6607 16.2484 3
 -2 -8 -5 65.0025 13.5719 3
 -2 -8 -5 65.277 9.90097 1
 2 -8 5 67.6576 13.9108 3
 2 8 5 65.4109 14.8948 3
 2 8 5 72.2845 17.9401 3
 -2 8 -5 49.279 15.2469 3
 -2 8 -5 56.2257 16.3094 3
 -3 -8 -5 16.5319 12.1144 3
 3 -8 5 22.0889 13.8738 3
 -3 -8 -5 22.8354 12.5078 3
 -3 -8 -5 23.1867 8.33388 1
 3 -8 5 42.7914 13.0498 3
 -3 8 -5 44.9733 14.6723 3
 3 8 5 7.51969 17.1475 3
 -3 8 -5 42.2143 16.5644 3
 3 8 5 24.1411 15.3228 3
 -4 -8 -5 19.767 12.442 3
 4 -8 5 21.6671 13.1516 3
 -4 -8 -5 13.538 8.36762 1
 4 -8 5 21.6888 13.6484 3
 -4 -8 -5 8.79847 12.5297 3
 -4 8 -5 2.68174 16.8447 3
 -4 8 -5 23.8787 15.4653 3
 4 8 5 19.8634 14.0282 3
 4 8 5 34.3137 18.7575 3
 5 -8 5 48.0635 15.8092 3
 -5 -8 -5 33.9267 13.8299 3
 5 -8 5 45.4351 16.0082 3
 -5 -8 -5 28.3123 13.3045 3
 5 -8 5 30.1748 8.82026 2
 5 8 5 34.0774 17.3835 3
 5 8 5 47.9494 7.85691 2
 5 8 5 28.3232 14.8577 3
 -5 8 -5 20.7021 15.7347 3
 -5 8 -5 61.9257 10.4152 1
 -6 -8 -5 19.0707 13.7965 3
 6 -8 5 15.6435 8.67107 2
 -6 -8 -5 10.9947 8.83382 1
 6 -8 5 14.0172 13.8643 3
 -6 -8 -5 -24.437 12.3795 3
 6 -8 5 -16.606 13.5849 3
 -6 8 -5 23.1896 15.7922 3
 6 8 5 -0.3762 14.985 3
 -6 8 -5 4.08717 10.3907 1
 6 8 5 17.737 8.32633 2
 -6 8 -5 25.9454 13.0578 3
 6 8 5 15.6121 17.7579 3
 7 -8 5 7.04406 8.72637 2
 7 -8 5 18.9675 15.7473 3
 -7 -8 -5 27.3534 13.9467 3
 -7 -8 -5 -2.1443 9.0116 1
 7 -8 5 18.5137 15.0147 3
 -7 8 -5 4.19718 11.484 1
 -7 8 -5 24.4898 13.8314 3
 -7 8 -5 21.6347 16.1267 3
 7 8 5 13.1938 9.82277 2
 7 8 5 -17.869 14.9774 3
 7 8 5 35.249 18.9394 3
 3 -9 -5 53.4112 16.4235 3
 -3 -9 5 27.7113 14.4948 3
 -3 -9 5 30.505 16.2327 3
 3 -9 -5 39.9696 15.2187 3
 3 -9 -5 59.6119 13.9483 1
 3 9 -5 24.0836 21.8979 3
 3 9 -5 45.1211 16.9462 3
 3 9 -5 47.6812 12.7851 2
 -3 9 5 22.3771 19.6245 3
 -3 9 5 60.5639 18.2912 3
 2 -9 -5 26.8205 15.0014 3
 2 -9 -5 68.1737 21.4263 3
 -2 -9 5 61.5087 16.6928 3
 -2 -9 5 49.9821 15.0743 3
 2 -9 -5 21.9148 12.7636 1
 -2 9 5 32.5236 16.6738 3
 -2 9 5 43.1944 19.7331 3
 2 9 -5 44.2066 20.2868 3
 2 9 -5 71.7166 16.9438 3
 1 -9 -5 1.87623 13.1759 1
 -1 -9 5 -28.439 14.2317 3
 1 -9 -5 -5.4447 14.2304 3
 -1 -9 5 -4.4399 15.1567 3
 1 -9 -5 7.00961 15.6708 3
 -1 9 5 7.21013 18.1063 3
 1 9 -5 16.2142 20.6964 3
 -1 9 5 16.2294 14.9432 3
 1 9 -5 -16.837 15.9212 3
 0 -9 -5 12.5695 15.9323 3
 0 -9 5 -13.895 14.2567 3
 0 -9 5 -3.3664 14.9304 3
 0 -9 -5 12.9503 14.5156 3
 0 -9 -5 1.11765 11.4561 1
 0 9 -5 23.7865 20.3325 3
 0 9 5 -3.8606 20.2146 3
 0 9 -5 8.38304 16.1545 3
 -1 -9 -5 14.4118 10.3519 1
 -1 -9 -5 30.1862 15.4331 3
 -1 -9 -5 77.5132 16.5542 3
 1 -9 5 51.5928 15.271 3
 1 -9 5 46.0367 16.3477 3
 -1 9 -5 21.7345 15.8824 3
 1 9 5 56.3287 20.2719 3
 1 9 5 31.3669 16.7715 3
 -1 9 -5 3.14298 21.223 3
 -2 -9 -5 -10.075 9.69885 1
 2 -9 5 18.1671 14.4888 3
 2 -9 5 -19.374 15.3239 3
 -2 -9 -5 -2.2492 16.0716 3
 -2 -9 -5 -7.1778 14.9346 3
 -2 9 -5 1.75868 17.3191 3
 -2 9 -5 8.30908 21.0253 3
 2 9 5 4.69171 21.1492 3
 2 9 5 35.6168 17.8143 3
 -17 0 6 8.96424 13.2679 3
 -17 0 6 1.78885 12.6799 1
 17 0 -6 29.1765 12.7735 3
 17 0 -6 -21.183 14.3976 3
 -17 0 6 22.8778 17.2652 3
 -16 0 6 36.848 13.7282 3
 -16 0 6 13.3003 10.1992 3
 16 0 -6 71.1912 14.5182 3
 -16 0 6 45.1244 12.2967 1
 16 0 -6 28.9289 10.6175 3
 -15 0 6 12.1182 10.1226 1
 15 0 -6 10.1617 11.0729 3
 -15 0 6 7.6537 8.55044 3
 -15 0 6 9.95839 11.746 3
 15 0 -6 24.998 9.61351 3
 -14 0 6 12.8681 10.3098 3
 -14 0 6 1.19401 9.01061 1
 14 0 -6 16.0025 7.96655 3
 -14 0 6 26.6763 8.35165 3
 14 0 -6 20.3631 10.2268 3
 13 0 -6 0.6974 8.81205 3
 -13 0 6 6.10566 8.52515 1
 -13 0 6 20.0918 9.47495 3
 13 0 -6 5.72585 7.34638 3
 -13 0 6 8.41432 7.0625 3
 12 0 -6 241.742 14.5634 3
 12 0 -6 250.43 16.4144 3
 -12 0 6 224.569 13.445 3
 -12 0 6 236.895 15.5887 1
 -12 0 6 220.611 16.4844 3
 11 0 -6 30.4005 6.84774 3
 -11 0 6 25.9988 7.50096 1
 11 0 -6 40.5047 8.37707 3
 -11 0 6 22.1656 7.74253 3
 -11 0 6 29.1395 8.65987 3
 -10 0 6 1201.4 31.9837 3
 10 0 -6 1165.8 32.3402 3
 -10 0 6 1179.27 33.778 3
 -10 0 6 1191.88 33.8022 1
 10 0 -6 1222.64 33.5987 3
 -9 0 6 723.208 22.6631 1
 -9 0 6 724.153 20.7534 3
 9 0 -6 707.629 22.1016 3
 -9 0 6 712.55 22.4792 3
 9 0 -6 700.007 20.9515 3
 -8 0 6 3903.88 92.1374 1
 8 0 -6 3799.54 90.6879 3
 8 0 -6 3832.7 91.4113 3
 -8 0 6 3826.47 91.5131 3
 -8 0 6 3857.31 90.5814 3
 7 0 -6 221.636 9.47569 3
 -7 0 6 231.646 10.9762 3
 -7 0 6 233.689 9.3852 3
 -7 0 6 227.564 11.2947 1
 7 0 -6 240.415 11.1885 1
 7 0 -6 222.757 10.8535 3
 6 0 -6 774.776 21.8281 1
 -6 0 6 770.977 21.8411 1
 -6 0 6 799.583 21.0493 3
 6 0 -6 765.62 20.1827 3
 6 0 -6 767.024 20.9432 3
 -6 0 6 774.574 20.0828 3
 -5 0 6 855.079 22.0502 3
 5 0 -6 846.14 23.2143 1
 -5 0 6 926.674 23.5965 1
 -5 0 6 883.731 21.563 3
 5 0 -6 888.648 21.6838 3
 5 0 -6 839.62 22.1285 3
 -4 0 6 51.7863 3.59927 3
 -4 0 6 58.51 4.44487 3
 4 0 -6 45.1364 4.61733 1
 4 0 -6 53.3936 3.76711 3
 -4 0 6 46.564 6.46493 1
 4 0 -6 56.6732 4.65456 3
 3 0 -6 547.528 15.2774 1
 3 0 -6 530.771 15.2584 2
 -3 0 6 559.325 15.4056 1
 -2 0 6 -0.0559 3.44041 2
 2 0 -6 -3.4184 3.40138 2
 -1 0 6 5914.46 133.339 2
 -1 0 6 5896.57 133.05 3
 1 0 -6 5677.95 132.705 3
 -1 0 6 5745.15 132.501 3
 1 0 -6 5728.8 133.26 2
 1 0 -6 5757.29 133.05 3
 0 0 -6 7695.44 180.664 2
 0 0 6 8125.33 179.855 2
 0 0 6 7919.45 179.857 3
 0 0 -6 7448.35 179.583 3
 -1 0 -6 664.674 19.4696 3
 1 0 6 668.277 19.0976 3
 -1 0 -6 705.322 18.5719 3
 1 0 6 702.411 18.6516 3
 -2 0 -6 391.397 14.9104 3
 2 0 6 428.071 13.7881 3
 -2 0 -6 441.359 13.7067 3
 2 0 6 405.595 14.6557 3
 -3 0 -6 716.118 19.7548 3
 3 0 6 633.509 20.553 3
 -3 0 -6 636.835 20.8274 3
 3 0 6 685.561 19.7288 3
 -4 0 -6 356.089 13.5635 3
 -4 0 -6 340.453 15.3921 3
 4 0 6 342.541 14.987 3
 4 0 6 341.466 13.659 3
 5 0 6 13.2502 5.62976 3
 -5 0 -6 6.51048 5.58534 3
 -5 0 -6 1.87683 6.84125 3
 5 0 6 1.83833 6.56413 3
 -6 0 -6 39.9172 7.87879 3
 -6 0 -6 33.1376 6.35194 3
 6 0 6 28.6046 6.42356 3
 6 0 6 42.2013 8.02689 3
 7 0 6 666.979 23.9037 3
 7 0 6 641.238 21.8746 3
 -7 0 -6 672.773 23.9763 3
 -7 0 -6 699.091 22.2835 3
 -8 0 -6 2.39655 6.3729 3
 -8 0 -6 -3.7598 7.41192 3
 8 0 6 -1.4224 5.88968 3
 8 0 6 5.49527 8.36299 3
 -9 0 -6 43.6278 10.4496 3
 -9 0 -6 57.6462 9.04036 3
 9 0 6 69.1822 10.4107 3
 9 0 6 54.0243 8.90062 3
 -10 0 -6 121.464 13.0536 3
 10 0 6 134.415 18.4326 3
 10 0 6 145.53 14.8558 3
 -10 0 -6 132.358 14.5875 3
 11 0 6 -2.8039 7.97423 3
 -11 0 -6 -11.339 9.83762 3
 11 0 6 6.18469 11.203 3
 -11 0 -6 -6.5507 9.61804 3
 -12 0 -6 40.1671 10.3115 3
 12 0 6 27.3707 9.49545 3
 -12 0 -6 19.4733 11.6804 3
 12 0 6 32.3117 12.5282 3
 -13 0 -6 48.6522 11.4224 3
 13 0 6 23.9436 10.5321 3
 -13 0 -6 30.8596 12.9791 3
 13 0 6 27.2336 13.0997 3
 14 0 6 208.541 20.938 3
 14 0 6 201.411 19.9055 3
 -14 0 -6 166.945 16.4363 3
 -14 0 -6 186.843 24.9518 3
 15 0 6 111.416 18.005 3
 -15 0 -6 111.964 18.0488 3
 -15 0 -6 65.0042 14.5979 1
 15 0 6 91.7676 15.0128 3
 -15 0 -6 74.2704 14.4974 3
 -16 0 -6 106.203 16.0924 3
 -16 0 -6 56.3556 15.7447 1
 -16 0 -6 61.9231 19.9454 3
 16 0 6 50.6113 18.6314 3
 16 0 6 80.1599 16.5743 3
 -17 -1 6 10.2274 12.4322 1
 17 -1 -6 -10.117 14.8375 3
 17 -1 -6 24.9077 12.4234 3
 -17 -1 6 -1.0698 12.7636 3
 17 1 -6 -12.944 20.6214 3
 -17 1 6 -19.413 13.8059 1
 -17 1 6 -16.687 11.7384 3
 17 1 -6 -11.044 12.2914 3
 -16 -1 6 0.41547 13.8957 3
 -16 -1 6 -17.257 9.51351 3
 -16 -1 6 12.3886 10.7144 1
 16 -1 -6 -10.771 12.2547 3
 16 -1 -6 5.2012 10.1535 3
 16 1 -6 -3.1622 20.1626 3
 -16 1 6 30.8182 12.2783 1
 16 1 -6 -17.624 9.98774 3
 -16 1 6 -24.36 12.2107 3
 -15 -1 6 7.05026 8.50803 3
 15 -1 -6 12.0261 11.8363 3
 -15 -1 6 2.57382 11.3846 3
 15 -1 -6 6.43872 8.9576 3
 -15 -1 6 9.82609 9.98859 1
 -15 1 6 16.8389 9.0122 3
 15 1 -6 18.0218 9.70036 3
 -15 1 6 11.7074 11.2932 3
 15 1 -6 11.1744 16.7075 3
 -15 1 6 6.29153 10.6798 1
 -14 -1 6 53.5813 11.7375 3
 14 -1 -6 48.1979 9.36198 3
 -14 -1 6 49.839 9.29428 3
 -14 -1 6 65.5152 10.5209 1
 14 -1 -6 67.8177 11.5749 3
 14 1 -6 69.9087 10.2257 3
 14 1 -6 48.5921 14.7671 3
 -14 1 6 51.5552 12.2086 3
 -14 1 6 59.9543 9.32561 3
 -14 1 6 50.411 10.9021 1
 -13 -1 6 2.5897 8.97152 1
 13 -1 -6 4.12647 7.34742 3
 13 -1 -6 3.53018 8.83093 3
 -13 -1 6 6.91224 9.04844 3
 -13 -1 6 12.1906 7.18977 3
 -13 1 6 -0.7488 8.90267 1
 -13 1 6 2.90834 6.92815 3
 -13 1 6 5.39351 8.94715 3
 13 1 -6 14.0978 9.536 3
 13 1 -6 8.35999 7.57575 3
 12 -1 -6 115.193 14.5933 3
 -12 -1 6 125.973 14.9446 3
 -12 -1 6 123.708 13.316 1
 12 -1 -6 127.818 13.0184 3
 -12 -1 6 115.09 12.0542 3
 -12 1 6 133.65 14.7758 3
 -12 1 6 128.068 14.3826 1
 -12 1 6 105.06 11.6295 3
 12 1 -6 118.475 12.6415 3
 12 1 -6 128.735 15.3773 3
 11 -1 -6 5.04913 7.36898 3
 11 -1 -6 7.35479 6.2694 3
 -11 -1 6 3.17218 7.60366 3
 -11 -1 6 12.6732 7.99304 3
 -11 -1 6 -6.9493 6.30578 1
 11 1 -6 7.80332 6.20814 3
 -11 1 6 -5.7757 7.68139 3
 11 1 -6 11.1541 7.92647 3
 -11 1 6 8.04538 10.1825 3
 -11 1 6 -1.5755 7.08104 1
 10 -1 -6 19.9447 6.07412 3
 -10 -1 6 25.6721 7.68652 3
 10 -1 -6 24.2857 6.83231 3
 -10 -1 6 13.8654 6.27361 1
 -10 -1 6 20.1692 5.85994 3
 10 1 -6 16.001 7.5492 3
 -10 1 6 16.3582 5.43991 3
 -10 1 6 5.27597 6.63685 1
 -10 1 6 26.0007 7.32541 3
 10 1 -6 13.8088 6.09331 3
 -9 -1 6 60.6062 8.92281 1
 -9 -1 6 54.6608 7.79767 3
 9 -1 -6 61.9679 7.2585 3
 -9 -1 6 62.0586 8.62093 3
 9 -1 -6 51.1279 6.30284 3
 -9 1 6 58.7465 7.85041 1
 9 1 -6 51.9073 6.32552 3
 -9 1 6 61.8603 7.80668 3
 9 1 -6 66.5919 8.15717 3
 -9 1 6 62.8173 7.79037 3
 -8 -1 6 499.023 16.1405 3
 8 -1 -6 495.495 16.5456 3
 -8 -1 6 501.266 16.6102 1
 8 -1 -6 488.122 17.8624 1
 8 -1 -6 480.085 15.9096 3
 -8 -1 6 501.904 17.5409 3
 -8 1 6 520.761 17.1792 3
 8 1 -6 526.54 17.7697 3
 8 1 -6 498.106 15.9529 3
 -8 1 6 480.001 15.354 3
 -8 1 6 482.031 17.9402 1
 -7 -1 6 97.7863 9.38956 3
 7 -1 -6 98.8297 7.53402 3
 7 -1 -6 91.9678 9.71677 1
 -7 -1 6 103.077 7.75244 3
 7 -1 -6 104.169 8.44304 3
 -7 -1 6 104.6 8.22597 1
 7 1 -6 100.719 7.60153 3
 -7 1 6 97.2825 9.5818 1
 7 1 -6 97.0073 9.26213 3
 -7 1 6 97.9756 8.98354 3
 -7 1 6 95.8501 6.86792 3
 -6 -1 6 15.492 4.00124 3
 6 -1 -6 10.6947 3.64113 3
 -6 -1 6 10.2606 4.9668 3
 6 -1 -6 1.29088 4.89302 1
 -6 -1 6 13.57 4.62893 1
 6 -1 -6 12.904 4.37988 3
 -6 1 6 6.29035 4.50692 3
 -6 1 6 13.5008 3.58142 3
 6 1 -6 14.1852 3.88813 3
 6 1 -6 9.5862 4.86622 3
 -6 1 6 5.33683 5.18103 1
 -5 -1 6 62.3719 5.53808 3
 5 -1 -6 61.4264 5.93926 3
 -5 -1 6 60.7675 6.53748 1
 -5 -1 6 73.9155 7.42093 3
 5 -1 -6 57.7359 6.11299 1
 5 -1 -6 48.8391 5.14955 3
 -5 1 6 53.7687 6.12312 1
 5 1 -6 65.2605 7.1171 3
 5 1 -6 50.0113 5.97277 1
 -5 1 6 62.1325 5.0469 3
 5 1 -6 57.9753 5.7412 3
 -5 1 6 55.6077 6.37691 3
 -4 -1 6 749.717 18.88 3
 4 -1 -6 720.225 18.7792 3
 -4 -1 6 802.212 19.5243 1
 -4 -1 6 766.053 19.7135 3
 4 -1 -6 730.729 18.5261 3
 4 -1 -6 744.8 20.7764 1
 4 1 -6 728.788 19.5871 3
 -4 1 6 772.064 20.8765 1
 4 1 -6 779.093 19.3491 1
 -4 1 6 697.813 18.8092 3
 4 1 -6 727.169 18.9633 3
 -4 1 6 733.701 18.3814 3
 -3 -1 6 565.468 13.803 3
 3 -1 -6 515.062 13.6968 3
 -3 -1 6 552.957 13.9964 3
 3 -1 -6 540.421 14.5696 2
 3 -1 -6 536.524 15.8862 1
 3 -1 -6 528.495 13.5314 3
 3 1 -6 552.236 14.2475 1
 -3 1 6 494.593 14.1545 3
 3 1 -6 546.804 14.1454 3
 -3 1 6 559.415 15.9512 1
 -3 1 6 495.806 13.7914 3
 3 1 -6 539.834 15.7206 2
 3 1 -6 525.777 14.759 3
 -2 -1 6 20.6529 2.9774 3
 -2 -1 6 22.5968 4.33286 2
 -2 -1 6 20.8096 3.17267 3
 2 -1 -6 18.2602 2.98873 3
 2 -1 -6 16.0986 4.45116 1
 2 -1 -6 12.1631 3.26885 2
 2 1 -6 19.795 2.97039 3
 2 1 -6 24.5683 3.4484 3
 -2 1 6 14.9328 2.8331 3
 2 1 -6 13.8595 4.23089 2
 -2 1 6 9.13687 3.58803 3
 1 -1 -6 133.066 6.20321 3
 1 -1 -6 142.035 7.37062 3
 -1 -1 6 129.453 6.79304 3
 1 -1 -6 128.211 6.21789 2
 -1 -1 6 137.685 7.77705 2
 1 1 -6 131.292 6.95196 3
 1 1 -6 127.762 7.38702 3
 -1 1 6 133.146 7.12559 3
 -1 1 6 128.082 5.71285 3
 -1 1 6 129.643 6.1948 2
 1 1 -6 126.436 7.6186 2
 0 -1 -6 4023.33 91.7678 3
 0 -1 -6 3877.72 92.22 3
 0 -1 6 4036.05 92.1742 2
 0 -1 6 3896.93 91.9953 3
 0 1 -6 3972.94 92.1833 2
 0 1 -6 3939.96 92.091 3
 0 1 -6 4147.82 91.8211 3
 0 1 6 3812.45 92.122 3
 0 1 6 3905.15 91.3998 2
 1 -1 6 563.597 16.7279 3
 1 -1 6 596.759 16.125 3
 -1 -1 -6 554.454 16.0857 3
 -1 -1 -6 548.852 17.1532 3
 1 -1 6 574.96 16.0729 2
 -1 1 -6 597.552 16.0793 3
 1 1 6 571.23 16.1268 3
 -1 1 -6 556.537 16.7939 3
 1 1 6 559.15 17.0766 3
 -2 -1 -6 171.681 8.83845 3
 2 -1 6 159.781 8.67691 3
 -2 -1 -6 164.709 10.723 3
 2 -1 6 164.113 10.1556 3
 -2 1 -6 173.886 8.66598 3
 -2 1 -6 168.051 9.97474 3
 2 1 6 176.536 10.4664 3
 2 1 6 162.96 8.75661 3
 -3 -1 -6 154.086 11.4861 3
 3 -1 6 171.868 10.9927 3
 3 -1 6 176.943 9.54209 3
 -3 -1 -6 174.486 9.53064 3
 -3 1 -6 149.994 10.8033 3
 3 1 6 160.215 9.67977 3
 -3 1 -6 181.09 9.43034 3
 3 1 6 156.877 11.4616 3
 -4 -1 -6 242.32 11.7876 3
 -4 -1 -6 241.492 14.0286 3
 4 -1 6 231.864 11.2978 3
 4 -1 6 224.092 12.6772 3
 -4 1 -6 235.76 12.7966 3
 4 1 6 228.323 13.3924 3
 4 1 6 227.768 11.6531 3
 -4 1 -6 238.747 11.2498 3
 5 -1 6 2252.6 56.8843 3
 5 -1 6 2196.41 55.7704 3
 -5 -1 -6 2320.16 56.1048 3
 -5 -1 -6 2184.98 57.5022 3
 -5 1 -6 2268.72 55.7867 3
 5 1 6 2288.77 57.2403 3
 -5 1 -6 2186.31 56.6856 3
 5 1 6 2268.82 56.2116 3
 -6 -1 -6 253.153 13.5239 3
 6 -1 6 229.041 14.8351 3
 -6 -1 -6 237.054 15.4295 3
 6 -1 6 220.603 12.9706 3
 -6 1 -6 242.232 14.7611 3
 6 1 6 241.639 13.2154 3
 6 1 6 251.473 15.0911 3
 -6 1 -6 254.54 13.0375 3
 7 -1 6 198.072 14.9357 3
 -7 -1 -6 196.183 15.2247 3
 7 -1 6 180.727 13.0135 3
 -7 -1 -6 198.087 13.1644 3
 7 1 6 191.588 14.9299 3
 7 1 6 172.047 12.8314 3
 -7 1 -6 177.191 14.6932 3
 -7 1 -6 191.574 12.5962 3
 8 -1 6 19.9367 8.94007 3
 8 -1 6 22.708 7.20664 3
 -8 -1 -6 9.71291 8.97376 3
 -8 -1 -6 16.0181 6.93062 3
 8 1 6 9.57835 8.19954 3
 -8 1 -6 17.7283 8.67799 3
 8 1 6 7.45656 6.78602 3
 -8 1 -6 20.5838 7.27898 3
 -9 -1 -6 16.9978 9.48475 3
 9 -1 6 9.55025 7.52611 3
 -9 -1 -6 17.1278 7.58632 3
 9 -1 6 20.9652 9.48414 3
 -9 1 -6 18.392 7.58271 3
 9 1 6 10.9725 8.93206 3
 -9 1 -6 10.6102 9.08818 3
 9 1 6 1.82082 7.17701 3
 10 -1 6 32.8806 10.86 3
 10 -1 6 38.7703 9.32794 3
 -10 -1 -6 39.7339 8.82673 3
 -10 -1 -6 41.4813 10.8389 3
 10 1 6 46.6314 11.7274 3
 -10 1 -6 47.3525 9.31311 3
 10 1 6 47.1226 9.81217 3
 -10 1 -6 32.9452 10.7158 3
 -11 -1 -6 42.7445 11.6411 3
 -11 -1 -6 16.6615 15.8114 3
 11 -1 6 22.8528 11.7135 3
 11 -1 6 32.536 8.8488 3
 11 1 6 22.5604 9.60424 3
 -11 1 -6 43.2421 11.714 3
 -11 1 -6 44.5792 14.7292 3
 11 1 6 27.525 11.7327 3
 12 -1 6 37.1511 12.2841 3
 -12 -1 -6 23.2193 12.562 3
 -12 -1 -6 34.3611 9.90329 3
 12 -1 6 27.3386 9.88661 3
 12 1 6 18.9234 9.41543 3
 12 1 6 25.2107 11.861 3
 -12 1 -6 44.5052 10.6053 3
 -12 1 -6 15.5239 11.4658 3
 13 -1 6 56.7753 14.3863 3
 13 -1 6 39.2058 11.7256 3
 -13 -1 -6 65.9822 13.992 3
 -13 -1 -6 67.5972 12.9089 3
 13 1 6 85.2763 15.3198 3
 13 1 6 61.7692 12.1347 3
 -13 1 -6 68.6227 14.2305 3
 -13 1 -6 60.8754 11.9425 3
 -14 -1 -6 12.5493 13.9834 3
 14 -1 6 40.4663 12.7091 3
 14 -1 6 44.8092 15.765 3
 -14 -1 -6 49.742 12.2922 3
 -14 1 -6 20.63 12.5785 1
 -14 1 -6 35.671 11.7909 3
 -14 1 -6 37.637 14.8819 3
 14 1 6 40.174 11.6319 3
 14 1 6 32.965 14.8574 3
 15 -1 6 -15.256 14.4115 3
 15 -1 6 10.7103 12.068 3
 -15 -1 -6 30.0886 13.0678 3
 -15 -1 -6 -23.356 13.9746 3
 -15 1 -6 23.9039 12.992 3
 -15 1 -6 18.5552 14.716 3
 15 1 6 53.4912 17.0857 3
 15 1 6 -8.6912 11.4271 3
 16 -2 -6 78.2152 12.9497 3
 -16 -2 6 90.5944 13.682 3
 -16 -2 6 87.876 12.9908 1
 16 -2 -6 87.5045 14.7593 3
 -16 2 6 79.3269 12.0296 3
 -16 2 6 103.142 15.7451 1
 16 2 -6 92.8018 13.0217 3
 -16 2 6 81.3842 14.9791 3
 16 2 -6 78.4321 15.3375 3
 -15 -2 6 -13.785 10.6815 3
 15 -2 -6 -2.3267 10.6885 3
 -15 -2 6 15.7318 10.2027 3
 -15 -2 6 15.8065 10.493 1
 15 -2 -6 -2.8941 10.2809 3
 -15 2 6 20.2415 11.4637 3
 -15 2 6 13.9044 11.0646 1
 15 2 -6 24.1826 10.0501 3
 -15 2 6 8.88114 9.25884 3
 15 2 -6 4.99574 12.9213 3
 -14 -2 6 29.2453 8.92359 1
 14 -2 -6 27.5055 9.49883 3
 -14 -2 6 3.00468 12.2498 3
 -14 -2 6 29.1446 9.68542 3
 14 -2 -6 8.63338 10.3762 3
 14 2 -6 24.6938 11.8347 3
 -14 2 6 14.3835 10.7058 1
 -14 2 6 20.6005 8.4414 3
 -14 2 6 32.4027 10.9876 3
 14 2 -6 33.6147 9.60319 3
 -13 -2 6 -0.4056 9.03643 3
 -13 -2 6 8.39484 8.40383 3
 13 -2 -6 7.59679 8.23223 3
 13 -2 -6 -4.7187 8.96427 3
 -13 -2 6 7.82375 7.32414 1
 13 2 -6 -5.2241 9.79895 3
 -13 2 6 19.2371 9.71914 3
 -13 2 6 -2.2474 7.12708 3
 13 2 -6 9.02259 8.03571 3
 -13 2 6 4.11159 9.27175 1
 -12 -2 6 5.75523 10.2854 3
 12 -2 -6 23.2534 8.10314 3
 -12 -2 6 18.7985 8.1621 3
 -12 -2 6 22.4184 7.58112 1
 12 -2 -6 19.4221 8.57704 3
 -12 2 6 21.1743 9.22682 3
 12 2 -6 22.1135 7.73416 3
 -12 2 6 32.0915 9.66901 1
 -12 2 6 12.7418 6.56175 3
 12 2 -6 25.9063 10.1836 3
 -11 -2 6 18.286 7.32593 3
 -11 -2 6 13.2744 6.10367 1
 11 -2 -6 18.1202 9.43667 3
 -11 -2 6 0.08947 6.64086 3
 11 -2 -6 13.5368 7.60563 3
 -11 2 6 12.5996 7.80978 3
 11 2 -6 16.0262 10.6491 3
 -11 2 6 4.50339 8.54672 1
 11 2 -6 19.6447 7.82054 3
 -11 2 6 10.4538 5.919 3
 -10 -2 6 1.12311 5.44121 3
 10 -2 -6 10.991 6.87283 3
 -10 -2 6 22.0774 5.92945 1
 -10 -2 6 13.9604 6.54287 3
 10 -2 -6 16.9397 6.50021 3
 -10 2 6 11.6695 5.46133 3
 -10 2 6 14.1848 7.20681 1
 10 2 -6 17.8138 13.8637 3
 10 2 -6 24.5072 6.49521 3
 -10 2 6 23.563 7.80079 3
 9 -2 -6 22.397 5.96247 3
 9 -2 -6 13.6223 6.27262 3
 -9 -2 6 19.7779 5.71656 3
 -9 -2 6 21.8398 5.60243 1
 -9 2 6 19.0048 6.44996 3
 -9 2 6 19.17 5.1362 3
 9 2 -6 18.5266 5.68154 3
 -9 2 6 20.2829 6.86257 1
 -8 -2 6 90.0203 8.11542 1
 8 -2 -6 93.0682 8.58744 3
 8 -2 -6 94.606 11.1346 1
 8 -2 -6 104.919 9.40414 3
 -8 -2 6 102.18 8.81141 3
 8 2 -6 78.2659 8.79533 3
 -8 2 6 88.4885 9.77877 3
 -8 2 6 98.3984 8.08032 3
 -8 2 6 90.0943 10.7282 1
 -7 -2 6 83.9343 7.38663 1
 -7 -2 6 78.1631 8.04801 3
 7 -2 -6 87.6794 7.91855 3
 7 -2 -6 81.8578 10.0406 1
 7 -2 -6 87.0018 8.72408 3
 7 2 -6 76.6035 9.65246 3
 7 2 -6 79.627 8.11354 3
 -7 2 6 86.5547 8.67966 3
 -7 2 6 76.8219 9.98064 1
 -7 2 6 73.1913 7.16667 3
 -6 -2 6 98.3863 7.14023 1
 -6 -2 6 125.036 8.11795 3
 6 -2 -6 102.284 7.67591 3
 6 -2 -6 118.153 8.62601 3
 6 -2 -6 105.792 9.91034 1
 -6 2 6 108.581 9.86234 1
 -6 2 6 111.101 7.20255 3
 -6 2 6 112.357 8.37836 3
 6 2 -6 117.571 12.5793 3
 6 2 -6 115.229 8.29672 3
 5 -2 -6 1123.19 30.516 1
 5 -2 -6 1144.71 29.1846 3
 5 -2 -6 1133.31 28.7475 3
 -5 -2 6 1161.43 29.1368 3
 -5 -2 6 1163.74 28.0389 1
 -5 2 6 1100.45 29.1291 3
 -5 2 6 1144.9 30.5679 1
 -5 2 6 1145.09 28.5102 3
 5 2 -6 1126.06 29.2358 3
 4 -2 -6 181.863 8.68788 3
 4 -2 -6 190.65 8.0826 3
 4 -2 -6 175.896 10.283 1
 -4 -2 6 191.862 8.6076 3
 -4 -2 6 186.891 6.65683 1
 4 2 -6 184.006 16.3457 3
 -4 2 6 182.867 10.0132 1
 -4 2 6 188.111 7.8247 3
 -4 2 6 183.542 8.61904 3
 4 2 -6 189.419 9.17245 3
 -3 -2 6 22.8342 4.25422 3
 3 -2 -6 12.826 4.06151 3
 3 -2 -6 8.80928 4.73381 1
 3 -2 -6 16.1357 2.9499 2
 3 -2 -6 15.2736 3.65929 3
 -3 2 6 12.0963 3.09592 3
 -3 2 6 27.607 5.191 3
 3 2 -6 17.2363 4.70148 2
 2 -2 -6 337.94 12.3781 1
 -2 -2 6 352.949 11.7647 3
 -2 -2 6 361.396 12.0157 2
 2 -2 -6 347.943 10.9229 3
 2 2 -6 343.718 8.96915 1
 2 2 -6 335.218 12.0015 2
 -2 2 6 355.627 12.7454 3
 2 2 -6 353.664 11.9998 3
 -1 -2 6 18.128 4.56081 2
 -1 -2 6 26.104 4.22135 3
 1 -2 -6 25.8973 4.24665 3
 -1 -2 6 25.822 4.51233 3
 1 -2 -6 32.9552 5.45365 3
 1 2 -6 19.1876 4.09581 3
 1 2 -6 31.5646 5.02668 3
 1 2 -6 22.7669 4.61821 2
 -1 2 6 35.8754 5.62652 3
 0 -2 6 1.92903 4.05554 2
 0 -2 -6 4.84972 3.97065 3
 0 -2 6 4.55007 3.9759 3
 0 -2 -6 2.80824 5.28538 3
 0 -2 6 5.44681 4.44702 3
 0 2 -6 4.98828 4.18245 2
 0 2 6 1.84072 5.07292 3
 0 2 -6 0.53693 4.57196 3
 0 2 -6 5.44654 3.95968 3
 0 2 6 7.29554 4.14192 3
 -1 -2 -6 29.0024 4.97308 3
 1 -2 6 30.3218 4.90124 2
 1 -2 6 29.6602 4.73333 3
 -1 -2 -6 39.0253 6.31895 3
 -1 2 -6 46.2629 5.90468 3
 1 2 6 66.3646 9.10589 3
 1 2 6 35.3506 4.88529 3
 -1 2 -6 36.5845 4.82295 3
 2 -2 6 78.6661 7.53365 2
 2 -2 6 92.1469 8.22833 3
 2 -2 6 100.073 9.29909 3
 -2 -2 -6 91.0532 10.0916 3
 -2 -2 -6 82.6867 8.14791 3
 2 2 6 87.7737 8.23448 3
 2 2 6 98.6358 10.2233 3
 -2 2 -6 95.3034 7.97856 3
 -2 2 -6 96.1043 9.51785 3
 -3 -2 -6 263.288 14.1682 3
 3 -2 6 275.03 13.0257 3
 3 -2 6 280.627 11.9468 3
 -3 -2 -6 285.876 12.277 3
 -3 2 -6 270.781 13.1162 3
 -3 2 -6 300.288 11.965 3
 3 2 6 273.659 12.2055 3
 3 2 6 281.645 14.1731 3
 -4 -2 -6 16.7169 6.92331 3
 4 -2 6 13.6079 6.42435 3
 -4 -2 -6 6.51509 5.35596 3
 4 -2 6 13.4275 5.41953 3
 4 2 6 11.226 5.3959 3
 -4 2 -6 14.3544 4.90392 3
 -4 2 -6 10.772 6.3606 3
 4 2 6 15.5108 7.25556 3
 -5 -2 -6 837.838 24.7087 3
 -5 -2 -6 833.953 26.9069 3
 5 -2 6 856.905 26.0159 3
 5 -2 6 815.449 24.6719 3
 -5 2 -6 825.396 24.493 3
 5 2 6 823.72 24.9395 3
 5 2 6 859.641 26.6324 3
 -5 2 -6 843.725 26 3
 6 -2 6 98.2996 12.9705 3
 6 -2 6 80.576 10.5883 3
 -6 -2 -6 79.7479 10.5391 3
 -6 -2 -6 92.1204 10.3218 3
 -6 2 -6 81.4739 10.3071 3
 -6 2 -6 79.856 9.25729 3
 6 2 6 92.5055 12.828 3
 6 2 6 98.2343 10.8703 3
 -7 -2 -6 793.879 25.1019 3
 -7 -2 -6 782.521 27.4316 3
 7 -2 6 741.945 24.6237 3
 7 -2 6 776.024 26.4053 3
 7 2 6 774.538 25.1121 3
 -7 2 -6 786.12 24.834 3
 7 2 6 787.209 26.9944 3
 -7 2 -6 731.762 26.2605 3
 8 -2 6 -3.4113 6.7176 3
 8 -2 6 8.31358 8.91215 3
 -8 -2 -6 3.42495 6.90728 3
 -8 -2 -6 8.89459 9.00722 3
 8 2 6 10.8458 8.47988 3
 8 2 6 -0.1849 6.90404 3
 -8 2 -6 6.9514 6.93498 3
 -8 2 -6 -1.8068 8.04408 3
 -9 -2 -6 24.9995 10.3416 3
 9 -2 6 15.4152 10.0935 3
 -9 -2 -6 20.1979 8.492 3
 9 -2 6 13.3033 8.4968 3
 9 2 6 13.5368 9.37185 3
 -9 2 -6 11.3816 9.91381 3
 -9 2 -6 10.1514 7.92358 3
 9 2 6 17.069 7.99337 3
 -10 -2 -6 98.4004 13.2883 3
 10 -2 6 94.4836 11.508 3
 10 -2 6 112.224 13.9015 3
 -10 -2 -6 86.1558 11.1974 3
 10 2 6 89.3205 12.884 3
 -10 2 -6 94.7326 11.6495 3
 10 2 6 97.6559 11.6127 3
 -10 2 -6 89.2937 13.5698 3
 -11 -2 -6 39.8138 13.091 3
 -11 -2 -6 40.8746 11.0641 3
 11 -2 6 39.3823 12.815 3
 11 -2 6 35.3053 13.5808 3
 11 2 6 55.9376 11.1466 3
 -11 2 -6 33.5912 9.82106 3
 -11 2 -6 51.9534 13.0729 3
 11 2 6 19.9885 11.883 3
 12 -2 6 -12.076 8.76265 3
 12 -2 6 -16.466 11.4015 3
 -12 -2 -6 -22.54 11.5882 3
 -12 -2 -6 -0.0001 9.93219 3
 -12 2 -6 -1.8958 12.3371 3
 -12 2 -6 -1.6429 9.34465 3
 12 2 6 -0.5142 9.77061 3
 12 2 6 4.21708 11.7225 3
 -12 2 -6 -6.8771 8.99385 1
 13 -2 6 58.031 14.8198 3
 13 -2 6 31.53 12.0967 3
 -13 -2 -6 34.5434 11.283 3
 -13 -2 -6 35.6392 14.8997 3
 -13 2 -6 28.0057 11.5687 3
 13 2 6 24.4397 14.371 3
 13 2 6 11.6766 11.6082 3
 -13 2 -6 31.3633 12.1191 1
 -13 2 -6 15.0185 13.6113 3
 14 -2 6 24.6683 15.8758 3
 14 -2 6 19.729 12.0928 3
 -14 -2 -6 12.633 12.6414 3
 -14 -2 -6 -4.2389 14.8497 3
 14 2 6 -5.2681 12.1951 3
 -14 2 -6 21.7017 14.7727 3
 14 2 6 3.62561 15.1243 3
 -14 2 -6 13.8375 11.888 3
 -14 2 -6 7.47214 11.0412 1
 15 -2 6 -15.52 12.2193 3
 15 -2 6 13.2731 16.7443 3
 -15 -2 -6 1.88537 13.4414 3
 -15 -2 -6 30.5079 17.2982 3
 -15 2 -6 17.3279 13.2151 3
 15 2 6 -17.247 12.9783 3
 -15 2 -6 -12.161 13.125 1
 15 2 6 -3.3779 17.7071 3
 -15 2 -6 -26.087 15.2833 3
 16 -3 -6 43.0612 12.3041 3
 -16 -3 6 14.0959 10.4962 1
 -16 -3 6 18.0736 15.0209 3
 16 3 -6 -19.672 11.5637 3
 -16 3 6 -1.8023 12.2344 3
 -16 3 6 6.14496 14.8267 1
 -16 3 6 19.7675 12.7495 3
 16 3 -6 -25.433 14.579 3
 -15 -3 6 147.021 19.5336 3
 -15 -3 6 156.276 16.9943 1
 15 -3 -6 133.043 14.5294 3
 -15 3 6 154.643 21.4935 1
 15 3 -6 147.461 18.1514 3
 15 3 -6 125.874 14.2053 3
 -15 3 6 90.3423 13.5403 3
 -15 3 6 133.884 13.1789 3
 -14 -3 6 -4.2415 13.5913 1
 14 -3 -6 5.06786 10.0183 3
 -14 -3 6 19.8873 9.9016 3
 14 -3 -6 15.8847 18.3633 3
 -14 3 6 -0.9083 10.1024 1
 14 3 -6 1.99882 9.39206 3
 -14 3 6 27.2071 8.65459 3
 14 3 -6 2.92054 12.8419 3
 -14 3 6 -4.2973 8.11038 3
 -13 -3 6 197.097 17.0921 3
 13 -3 -6 226.412 17.4738 3
 13 -3 -6 196.003 27.0612 3
 -13 -3 6 236.715 15.3229 1
 13 3 -6 223.949 20.8176 3
 13 3 -6 182.249 16.5378 3
 -13 3 6 229.239 19.8454 1
 -13 3 6 191.422 15.1889 3
 12 -3 -6 106.941 14.5702 3
 -12 -3 6 117.158 13.7081 3
 12 -3 -6 106.034 20.5675 3
 -12 -3 6 105.524 12.367 1
 -12 -3 6 96.3971 18.7592 3
 12 3 -6 127.934 13.8451 3
 -12 3 6 87.7541 9.47921 3
 -12 3 6 103.058 12.516 1
 12 3 -6 98.8486 10.889 3
 -11 -3 6 8.28768 11.6448 3
 11 -3 -6 -7.2422 11.7039 3
 11 -3 -6 9.42348 7.65169 3
 -11 -3 6 8.96285 6.26889 1
 -11 -3 6 4.78046 7.23826 3
 -11 3 6 12.0137 9.22216 1
 -11 3 6 3.27762 6.74596 3
 11 3 -6 3.88835 9.23612 3
 11 3 -6 3.64604 7.24908 3
 -11 3 6 -9.1691 5.15334 3
 10 -3 -6 7.4332 11.2128 3
 -10 -3 6 12.9982 10.6194 3
 10 -3 -6 -14.745 13.8352 3
 -10 -3 6 7.60666 6.53339 3
 -10 -3 6 1.78308 5.19161 1
 10 3 -6 12.7407 12.2373 3
 -10 3 6 -1.888 5.75265 3
 -10 3 6 -6.3485 6.04487 3
 10 3 -6 16.1047 9.08858 3
 -10 3 6 8.4587 9.25166 1
 -9 -3 6 33.666 5.71762 1
 9 -3 -6 37.6862 13.766 3
 -9 -3 6 37.7883 10.0645 3
 9 -3 -6 32.5913 8.13385 1
 9 -3 -6 39.7879 7.12456 3
 -9 -3 6 33.7878 6.72175 3
 -9 3 6 35.8641 6.56844 3
 -9 3 6 46.5214 8.5757 1
 9 3 -6 38.4853 9.23289 3
 9 3 -6 31.5898 7.10478 3
 -8 -3 6 25.1936 8.02779 3
 8 -3 -6 29.1033 5.99414 3
 8 -3 -6 38.6413 7.60313 1
 8 -3 -6 26.3804 10.7595 3
 -8 -3 6 35.0007 6.39689 3
 -8 -3 6 32.0117 5.03514 1
 8 3 -6 35.1039 6.75568 3
 -8 3 6 29.321 7.33327 1
 8 3 -6 39.4388 8.3264 3
 -8 3 6 32.4474 5.68817 3
 7 -3 -6 110.677 11.6516 1
 7 -3 -6 129.43 9.45338 3
 -7 -3 6 124.51 9.97524 3
 -7 -3 6 113.713 7.161 1
 -7 -3 6 119.312 12.5232 3
 7 -3 -6 117.396 12.5793 3
 7 3 -6 124.747 10.4777 3
 -7 3 6 115.459 11.6483 1
 -7 3 6 116.701 8.92604 3
 7 3 -6 151.688 12.6376 3
 -6 -3 6 157.892 12.764 3
 6 -3 -6 162.016 11.4808 1
 6 -3 -6 153.522 9.67422 3
 -6 -3 6 159.349 6.89596 1
 -6 -3 6 176.464 10.1007 3
 6 -3 -6 152.042 10.3256 3
 -6 3 6 145.587 8.96999 3
 6 3 -6 176.003 13.2684 3
 6 3 -6 172.899 10.6299 3
 -6 3 6 165.188 11.5015 1
 5 -3 -6 1401.86 36.3952 3
 5 -3 -6 1388.47 37.2786 1
 -5 -3 6 1416.1 38.1759 3
 -5 -3 6 1399.4 33.2883 1
 5 -3 -6 1371.29 35.8046 3
 -5 -3 6 1454.27 36.5727 3
 -5 3 6 1422.89 35.6777 3
 5 3 -6 1416.79 36.7931 3
 -5 3 6 1430.2 37.4275 1
 5 3 -6 1401.86 37.8859 3
 4 -3 -6 58.8927 7.63028 3
 -4 -3 6 66.1117 6.54264 3
 -4 -3 6 67.653 7.77938 3
 4 -3 -6 67.1001 7.16707 1
 4 -3 -6 79.1431 8.54653 3
 4 3 -6 64.6327 6.69083 3
 -4 3 6 64.547 9.06979 1
 4 3 -6 75.1173 8.14128 3
 4 3 -6 70.6114 8.60719 2
 3 -3 -6 598.307 18.1548 3
 -3 -3 6 616.96 17.837 3
 3 -3 -6 586.357 17.5199 3
 -3 -3 6 628.893 18.4605 3
 3 -3 -6 590.72 18.6857 1
 -3 3 6 588.634 19.5655 3
 3 3 -6 590.218 20.2451 3
 3 3 -6 584.043 18.0572 2
 3 3 -6 600.831 18.7164 3
 -3 3 6 572.861 18.1898 3
 2 -3 -6 34.3161 5.66565 1
 2 -3 -6 39.169 5.5978 3
 -2 -3 6 33.0447 5.33251 3
 -2 -3 6 46.4043 5.99762 3
 2 -3 -6 32.0678 4.98863 3
 2 3 -6 52.2449 7.41468 3
 -2 3 6 43.7103 5.69477 3
 2 3 -6 43.9394 5.9811 3
 -2 3 6 41.1972 6.8045 3
 2 3 -6 26.2183 5.22124 2
 -1 -3 6 424.637 14.1832 2
 1 -3 -6 434.585 14.5873 1
 -1 -3 6 448.371 14.5627 3
 -1 -3 6 440.281 15.1949 3
 1 -3 -6 449.756 14.9705 3
 -1 3 6 426.599 14.9672 3
 1 3 -6 448.143 14.6082 3
 1 3 -6 415.967 14.2095 2
 1 3 -6 445.282 15.4454 3
 -1 3 6 437.284 16.5639 3
 0 -3 6 932.389 25.8889 3
 0 -3 6 916.47 25.2664 3
 0 -3 -6 934.075 25.4605 3
 0 -3 -6 911.658 26.9141 3
 0 -3 6 915.111 24.5925 2
 0 3 6 940.283 26.8203 3
 0 3 -6 913.316 25.9833 3
 0 3 -6 918.635 24.698 2
 0 3 -6 942.348 25.1596 3
 0 3 6 878.993 25.396 3
 -1 -3 -6 16.8615 5.30026 3
 1 -3 6 17.5257 5.76278 3
 1 -3 6 11.8876 4.96007 3
 1 -3 6 12.4157 4.6895 2
 -1 -3 -6 17.2244 6.93578 3
 -1 3 -6 21.9377 6.20558 3
 1 3 6 13.7491 6.79101 3
 -1 3 -6 13.2493 4.9805 3
 1 3 6 14.7331 5.42624 3
 -2 -3 -6 1.06895 5.01471 3
 2 -3 6 0.6272 4.97041 3
 2 -3 6 2.33156 5.81743 3
 2 -3 6 1.91254 4.64523 2
 -2 -3 -6 10.286 6.80601 3
 -2 3 -6 1.66653 5.0555 3
 2 3 6 2.51407 5.19686 3
 2 3 6 5.43099 6.83048 3
 -2 3 -6 6.88415 5.86977 3
 3 -3 6 -1.431 4.53358 2
 3 -3 6 -3.2069 4.94394 3
 3 -3 6 -0.3278 5.80222 3
 -3 -3 -6 -0.4291 6.27009 3
 -3 -3 -6 0.93502 5.2964 3
 3 3 6 0.54234 6.84686 3
 3 3 6 4.32297 5.1478 3
 -3 3 -6 1.62021 5.10702 3
 -3 3 -6 4.07203 6.25818 3
 4 -3 6 193.961 11.6831 3
 4 -3 6 199.603 12.8799 3
 -4 -3 -6 196.886 11.9788 3
 -4 -3 -6 181.644 13.8172 3
 -4 3 -6 201.517 11.6714 3
 -4 3 -6 177.345 12.918 3
 4 3 6 183.827 14.1503 3
 4 3 6 187.221 11.7895 3
 5 -3 6 16.332 5.90433 3
 -5 -3 -6 5.86904 7.91618 3
 5 -3 6 17.0787 6.86489 3
 -5 -3 -6 6.71153 5.71799 3
 -5 3 -6 15.3117 7.17543 3
 -5 3 -6 19.6162 6.06535 3
 5 3 6 10.156 7.61344 3
 5 3 6 18.0936 6.38608 3
 6 -3 6 142.115 13.4572 3
 6 -3 6 133.578 11.969 3
 -6 -3 -6 147.546 12.3024 3
 -6 -3 -6 130.28 14.9516 3
 -6 3 -6 136.048 11.8303 3
 -6 3 -6 148.196 14.0255 3
 6 3 6 151.744 14.9082 3
 6 3 6 136.877 12.2401 3
 -7 -3 -6 6.55005 8.67761 3
 7 -3 6 6.51955 6.63068 3
 7 -3 6 2.08704 7.6008 3
 -7 -3 -6 3.97413 6.70424 3
 -7 3 -6 3.95592 8.43671 3
 7 3 6 -2.4779 6.74927 3
 -7 3 -6 -0.0354 6.51025 3
 7 3 6 7.59343 9.00916 3
 -8 -3 -6 427.558 23.3174 3
 8 -3 6 457.295 21.8068 3
 -8 -3 -6 429.456 19.5422 3
 8 -3 6 425.833 19.4227 3
 8 3 6 434.266 20.0119 3
 -8 3 -6 428.667 19.2788 3
 8 3 6 446.928 22.1868 3
 -8 3 -6 425.345 19.1378 1
 -8 3 -6 432.676 21.4199 3
 -9 -3 -6 141.058 15.3185 3
 -9 -3 -6 164.167 19.7671 3
 9 -3 6 149.732 15.7982 3
 9 -3 6 164.67 18.251 3
 -9 3 -6 161.874 18.1594 3
 -9 3 -6 184.624 15.7217 3
 9 3 6 157.182 16.2051 3
 -9 3 -6 154.009 15.4167 1
 9 3 6 155.56 18.5063 3
 -10 -3 -6 510.03 27.6228 3
 -10 -3 -6 521.735 24.3565 3
 10 -3 6 524.753 26.3562 3
 10 -3 6 560.787 24.3558 3
 -10 3 -6 529.685 29.724 3
 10 3 6 500.626 24.253 3
 -10 3 -6 526.866 23.0495 1
 -10 3 -6 523.517 26.1832 3
 10 3 6 535.953 26.6189 3
 -11 -3 -6 8.88459 9.83309 3
 11 -3 6 20.0181 10.4186 3
 11 -3 6 9.96068 11.1569 3
 -11 -3 -6 8.75792 13.2719 3
 11 3 6 22.9514 12.699 3
 -11 3 -6 2.60651 9.45038 1
 -11 3 -6 -8.26 11.9385 3
 -11 3 -6 13.4894 9.80594 3
 11 3 6 12.2365 10.2781 3
 -12 -3 -6 83.8484 17.1989 3
 -12 -3 -6 77.3674 13.941 3
 12 -3 6 76.9819 14.9576 3
 12 -3 6 78.2922 13.0109 3
 12 3 6 69.4555 15.756 3
 12 3 6 78.0228 13.7333 3
 -12 3 -6 85.8945 12.9535 3
 -12 3 -6 69.065 16.1492 3
 -12 3 -6 62.3668 12.8092 1
 13 -3 6 -0.7934 13.9692 3
 -13 -3 -6 -7.2809 10.9982 3
 13 -3 6 4.0361 12.31 3
 -13 -3 -6 28.2904 15.7194 3
 -13 3 -6 -23.094 10.4856 1
 -13 3 -6 -0.3122 14.3725 3
 -13 3 -6 -2.5024 11.0985 3
 13 3 6 -25.893 14.1929 3
 13 3 6 -13.575 11.2033 3
 14 -3 6 18.1297 12.3335 3
 -14 -3 -6 30.8144 17.7003 3
 14 -3 6 22.2277 16.3191 3
 -14 -3 -6 -3.6916 12.8384 3
 -14 3 -6 27.9092 13.2232 3
 14 3 6 22.5445 16.7227 3
 14 3 6 22.9065 12.5987 3
 -14 3 -6 1.07324 15.7536 3
 -14 3 -6 11.8239 12.8078 1
 15 -3 6 -1.7046 18.2863 3
 -15 -3 -6 56.1493 15.4073 3
 15 -3 6 -7.771 14.0196 3
 -15 -3 -6 51.6337 19.8806 3
 -15 3 -6 14.7596 18.4008 3
 -15 3 -6 33.2807 14.9112 1
 15 3 6 16.6429 17.9033 3
 -15 3 -6 64.6233 15.329 3
 15 3 6 23.0962 14.3377 3
 -15 -4 6 11.9695 9.59219 1
 -15 -4 6 -6.1088 15.5595 3
 15 -4 -6 -10.113 12.1021 3
 -15 -4 6 12.2793 13.4654 3
 15 -4 -6 -4.2122 13.6678 3
 -15 4 6 16.342 12.276 3
 -15 4 6 31.1351 13.9559 1
 15 4 -6 -0.8554 15.7953 3
 15 4 -6 14.5261 12.3006 3
 -15 4 6 -4.3926 20.3525 3
 14 -4 -6 16.5803 11.1247 3
 -14 -4 6 -21.208 14.1083 3
 -14 -4 6 6.71687 10.8739 3
 -14 -4 6 18.3893 8.81903 1
 14 -4 -6 -12.802 12.0985 3
 14 4 -6 27.916 11.0091 3
 14 4 -6 22.8084 14.3708 3
 -14 4 6 13.3386 12.4971 1
 -14 4 6 15.9703 9.96337 3
 -13 -4 6 7.20194 9.81208 3
 -13 -4 6 15.4801 13.1102 3
 -13 -4 6 5.98231 7.41359 1
 13 -4 -6 3.69449 9.60023 3
 13 -4 -6 13.4769 11.0913 3
 -13 4 6 2.55545 11.0763 1
 13 4 -6 8.79287 9.39454 3
 -13 4 6 17.7558 8.82519 3
 13 4 -6 14.9982 12.9677 3
 12 -4 -6 22.9838 10.1762 3
 12 -4 -6 20.6227 9.39366 3
 -12 -4 6 11.9121 6.88569 1
 -12 -4 6 21.6731 12.722 3
 -12 -4 6 7.07083 8.68714 3
 12 4 -6 0.11905 11.4291 3
 -12 4 6 14.2072 10.3565 1
 -12 4 6 16.6053 8.33667 3
 12 4 -6 17.9256 9.38737 3
 -11 -4 6 115.299 14.477 3
 -11 -4 6 82.9506 10.5483 3
 -11 -4 6 72.2157 7.73971 1
 11 -4 -6 59.8823 11.0442 3
 11 -4 -6 80.4963 10.0657 3
 -11 4 6 68.1129 9.21077 3
 11 4 -6 76.5673 13.3027 3
 11 4 -6 67.0641 10.4376 3
 -11 4 6 89.686 12.4396 1
 -10 -4 6 58.4929 11.6324 3
 10 -4 -6 33.5869 9.37532 3
 -10 -4 6 42.0045 8.72249 3
 10 -4 -6 35.4939 8.415 3
 -10 -4 6 35.9539 6.23982 1
 10 4 -6 48.8359 11.658 3
 -10 4 6 33.902 10.0872 1
 -10 4 6 33.9701 7.52164 3
 10 4 -6 30.2011 8.76751 3
 9 -4 -6 4.03392 7.70406 3
 9 -4 -6 10.4507 8.76964 1
 -9 -4 6 2.92148 7.0043 3
 9 -4 -6 1.53405 6.99734 3
 -9 -4 6 5.20364 4.73622 1
 -9 -4 6 12.3219 10.1545 3
 9 4 -6 -1.4184 8.31307 3
 -9 4 6 15.2549 8.55857 3
 -9 4 6 4.61456 8.9723 1
 -9 4 6 -3.4129 6.12153 3
 9 4 -6 10.8157 9.41093 3
 -8 -4 6 23.5385 8.41868 3
 8 -4 -6 27.6962 7.05635 3
 8 -4 -6 38.1517 8.80903 1
 -8 -4 6 27.1899 4.55496 1
 -8 -4 6 17.5541 9.19109 3
 8 -4 -6 23.9836 7.56968 3
 8 4 -6 18.9659 9.40198 3
 -8 4 6 23.0572 10.5366 3
 -8 4 6 12.9118 7.61084 3
 8 4 -6 25.44 7.55175 3
 -8 4 6 31.2901 8.44316 1
 -7 -4 6 8.79609 6.21902 3
 7 -4 -6 -0.3893 6.88773 1
 7 -4 -6 -0.996 6.03871 3
 -7 -4 6 -0.7853 3.19201 1
 7 -4 -6 11.6793 6.90083 3
 -7 -4 6 14.3274 8.64841 3
 7 4 -6 3.48289 6.30221 3
 7 4 -6 3.76933 8.518 3
 -7 4 6 5.71646 7.07728 1
 -7 4 6 5.49531 5.61266 3
 -7 4 6 0.23949 6.6195 3
 6 -4 -6 35.9186 7.02352 3
 -6 -4 6 36.9062 6.73107 3
 6 -4 -6 33.7301 7.51366 1
 6 -4 -6 41.2913 6.91646 3
 6 4 -6 38.6793 7.00591 2
 -6 4 6 32.3573 6.16823 3
 -6 4 6 31.1294 7.33103 3
 6 4 -6 49.1408 7.654 3
 6 4 -6 22.6721 8.44464 3
 -6 4 6 37.5304 7.74036 1
 5 -4 -6 107.478 10.5356 3
 -5 -4 6 99.7163 9.91536 3
 -5 -4 6 78.6855 9.48475 3
 5 -4 -6 91.3496 10.5548 1
 5 -4 -6 88.8319 9.91885 3
 5 4 -6 111.104 13.592 3
 5 4 -6 94.7816 11.2137 3
 -5 4 6 90.0902 10.3911 1
 -5 4 6 81.2113 10.7009 3
 5 4 -6 90.3632 9.79467 2
 -4 -4 6 626.856 19.8784 3
 4 -4 -6 620.516 19.6646 3
 4 -4 -6 613.506 20.3717 1
 4 -4 -6 631.521 20.3739 3
 -4 -4 6 635.602 20.7528 3
 4 4 -6 633.397 22.8408 3
 4 4 -6 643.726 20.8699 3
 -4 4 6 602.203 21.8345 3
 4 4 -6 619.706 19.5621 2
 -4 4 6 606.605 20.5653 3
 3 -4 -6 967.915 26.9514 3
 3 -4 -6 965.444 27.5137 1
 3 -4 -6 981.283 27.8219 3
 -3 -4 6 968.888 27.1988 3
 -3 -4 6 1011.82 28.1147 3
 3 4 -6 980.41 29.9618 3
 -3 4 6 970.907 29.2886 3
 -3 4 6 954.504 27.8129 3
 3 4 -6 980.182 28.2795 3
 3 4 -6 949.532 26.6239 2
 -2 -4 6 176.246 11.7454 3
 2 -4 -6 183.963 10.5762 3
 2 -4 -6 159.987 10.5318 1
 2 -4 -6 174.17 11.3939 3
 -2 -4 6 169.038 10.8831 3
 -2 4 6 174.606 11.4716 3
 2 4 -6 191.188 14.0144 3
 -2 4 6 162.639 13.2492 3
 2 4 -6 170.705 10.0157 2
 2 4 -6 184.736 12.1475 3
 -1 -4 6 1.71656 4.90791 2
 1 -4 -6 -3.6685 4.90544 3
 -1 -4 6 -2.4403 5.7358 3
 1 -4 -6 5.26203 5.25161 1
 -1 -4 6 -8.247 5.2587 3
 1 -4 -6 3.98669 5.63581 3
 1 4 -6 3.958 6.13176 3
 -1 4 6 11.8066 5.83284 3
 1 4 -6 -5.411 4.56146 2
 -1 4 6 13.4977 7.15096 3
 0 -4 -6 238.29 15.2426 3
 0 -4 6 248.056 13.0454 3
 0 -4 -6 242.521 11.2871 1
 0 -4 6 247.663 10.9741 2
 0 -4 -6 240.419 12.7121 3
 0 -4 6 241.221 12.1849 3
 0 4 -6 244.688 11.2482 2
 0 4 6 238.847 14.6958 3
 0 4 -6 241.68 8.26321 1
 0 4 -6 259.235 12.2619 3
 0 4 -6 220.499 13.4994 3
 0 4 6 227.829 12.746 3
 1 -4 6 541.558 19.2024 3
 1 -4 6 530.644 18.096 3
 -1 -4 -6 504.346 20.8178 3
 1 -4 6 558.401 16.8401 2
 -1 -4 -6 539.997 18.6295 3
 1 4 6 537.005 18.764 3
 1 4 6 518.294 20.5622 3
 -1 4 -6 523.25 15.1438 1
 -1 4 -6 525.454 17.9719 3
 -1 4 -6 511.352 19.2728 3
 2 -4 6 0.05954 4.88636 2
 -2 -4 -6 2.09203 5.56012 3
 2 -4 6 -0.0507 6.09685 3
 2 -4 6 -0.4333 5.45266 3
 -2 -4 -6 -6.623 7.56664 3
 2 4 6 -5.8853 5.58781 3
 -2 4 -6 7.27558 5.8329 3
 2 4 6 -5.6066 7.5896 3
 -2 4 -6 -1.4974 4.26358 1
 -2 4 -6 4.93431 6.47515 3
 3 -4 6 621.403 21.8363 3
 -3 -4 -6 599.092 20.5583 3
 3 -4 6 605.124 20.3671 3
 3 -4 6 591.575 18.7796 2
 -3 -4 -6 585.905 23.0971 3
 3 4 6 618.587 23.6217 3
 -3 4 -6 587.298 21.778 3
 -3 4 -6 621.045 18.6685 1
 -3 4 -6 609.623 20.2144 3
 3 4 6 595.032 21.1669 3
 4 -4 6 144.606 10.5637 2
 -4 -4 -6 154.305 15.3881 3
 4 -4 6 137.154 13.0999 3
 4 -4 6 130.233 11.8908 3
 -4 -4 -6 129.953 12.3278 3
 4 4 6 123.364 15.4761 3
 -4 4 -6 134.641 13.3338 3
 -4 4 -6 136.528 11.8509 3
 -4 4 -6 116.92 10.2899 1
 4 4 6 133.551 12.6653 3
 5 -4 6 407.581 17.6103 3
 5 -4 6 398.443 18.719 3
 -5 -4 -6 415.872 20.498 3
 -5 -4 -6 417.951 18.0675 3
 5 -4 6 397.296 16.0007 2
 5 4 6 396.549 18.1792 3
 -5 4 -6 410.203 17.3798 3
 5 4 6 433.635 20.2493 3
 -5 4 -6 408.194 19.0957 3
 -5 4 -6 428.71 16.4007 1
 -6 -4 -6 -7.7645 8.88742 3
 6 -4 6 2.55513 7.83347 3
 6 -4 6 -4.7464 6.88416 3
 -6 -4 -6 0.52811 6.80327 3
 -6 4 -6 2.17572 6.24828 1
 -6 4 -6 -0.9291 6.75915 3
 6 4 6 4.38632 7.39785 3
 -6 4 -6 -4.4576 7.87171 3
 6 4 6 -0.2118 9.00642 3
 -7 -4 -6 12.7528 10.0439 3
 7 -4 6 -1.0363 8.67356 3
 -7 -4 -6 -4.2214 7.5781 3
 7 -4 6 3.83523 7.62469 3
 7 4 6 1.81319 10.1171 3
 7 4 6 -6.0502 7.62282 3
 -7 4 -6 2.87866 7.28883 3
 -7 4 -6 -1.4331 7.08197 1
 -7 4 -6 11.094 9.71567 3
 -8 -4 -6 24.0431 9.10025 3
 8 -4 6 14.2837 9.2146 3
 8 -4 6 5.9426 8.39329 3
 -8 -4 -6 18.8112 10.583 3
 -8 4 -6 9.9548 8.16038 3
 8 4 6 24.7411 11.6159 3
 -8 4 -6 21.6537 10.1116 3
 8 4 6 20.6585 9.08424 3
 -8 4 -6 25.897 8.19909 1
 9 -4 6 5.09398 10.0206 3
 9 -4 6 -2.3962 8.57578 3
 -9 -4 -6 23.0314 11.8592 3
 -9 -4 -6 -2.7529 8.73799 3
 9 4 6 -11.289 8.49392 3
 -9 4 -6 7.88646 15.8512 3
 9 4 6 -4.1629 11.1643 3
 -9 4 -6 8.66971 10.8252 3
 -9 4 -6 7.00208 8.2291 1
 10 -4 6 12.434 11.2436 3
 10 -4 6 4.30761 10.1584 3
 -10 -4 -6 -0.7841 12.543 3
 -10 -4 -6 15.3788 9.20601 3
 -10 4 -6 34.0046 12.6798 3
 -10 4 -6 -8.4521 9.80549 3
 10 4 6 8.61844 12.5141 3
 10 4 6 6.83185 17.643 3
 -10 4 -6 9.52565 9.5404 1
 11 -4 6 -2.3515 10.9453 3
 11 -4 6 20.1521 12.5514 3
 -11 -4 -6 7.9498 10.7767 3
 -11 -4 -6 20.8213 14.7304 3
 -11 4 -6 23.4689 13.4283 3
 -11 4 -6 33.4174 11.4981 1
 11 4 6 9.42279 13.17 3
 11 4 6 18.4451 11.2681 3
 -11 4 -6 10.03 10.9437 3
 12 -4 6 36.3853 13.4588 3
 -12 -4 -6 5.34499 11.882 3
 -12 -4 -6 -2.524 14.4787 3
 12 -4 6 1.3681 13.2623 3
 -12 4 -6 54.014 14.8225 3
 12 4 6 22.1867 12.2395 3
 -12 4 -6 9.69562 11.8655 3
 12 4 6 4.66944 15.1638 3
 -12 4 -6 7.34531 11.089 1
 13 -4 6 22.0399 15.7706 3
 13 -4 6 -12.184 13.7758 3
 -13 -4 -6 -0.6332 15.3496 3
 -13 -4 -6 -31.37 12.6103 3
 13 4 6 2.21183 14.836 3
 -13 4 -6 4.26366 11.2529 1
 -13 4 -6 18.1313 13.2211 3
 13 4 6 -21.946 11.6269 3
 -13 4 -6 -2.6048 15.7756 3
 14 -4 6 -25.931 17.0121 3
 -14 -4 -6 -6.3684 18.6216 3
 -14 -4 -6 14.9679 13.7519 3
 14 -4 6 -4.3681 14.5931 3
 14 4 6 49.88 19.442 3
 -14 4 -6 -14.772 17.1568 3
 14 4 6 16.7258 14.6733 3
 -14 4 -6 31.8613 15.1024 3
 -14 4 -6 7.77615 13.1623 1
 14 -5 -6 -7.508 12.7255 3
 14 -5 -6 -28.513 13.4833 3
 -14 -5 6 -12.853 12.8459 3
 -14 -5 6 18.344 17.7051 3
 -14 5 6 1.31171 15.1384 3
 14 5 -6 13.5961 16.0244 3
 -14 5 6 26.7102 16.4216 1
 14 5 -6 6.65315 12.31 3
 -14 5 6 -19.559 11.2456 3
 -13 -5 6 36.5478 16.4589 3
 -13 -5 6 38.5197 12.8505 3
 13 -5 -6 55.2184 13.0308 3
 -13 -5 6 43.7071 8.42962 1
 13 -5 -6 61.724 13.8391 3
 -13 5 6 69.2168 14.8492 1
 13 5 -6 32.4541 12.4261 3
 13 5 -6 31.6692 15.9542 3
 -13 5 6 45.7821 14.0644 3
 -13 5 6 27.658 10.8964 3
 12 -5 -6 -14.619 11.1367 3
 -12 -5 6 11.3904 6.58403 1
 12 -5 -6 2.1541 10.6929 3
 -12 -5 6 4.64531 9.78272 3
 -12 -5 6 -6.2144 13.6788 3
 12 5 -6 3.03115 14.7007 3
 -12 5 6 7.3594 12.1203 3
 -12 5 6 16.1896 11.564 1
 12 5 -6 14.2238 10.49 3
 -12 5 6 -4.4755 8.64895 3
 11 -5 -6 178.13 16.9993 3
 -11 -5 6 169.738 22.7736 3
 -11 -5 6 150.508 10.9022 1
 -11 -5 6 190.708 17.5162 3
 11 -5 -6 154.917 18.1236 3
 -11 5 6 171.415 18.9498 3
 11 5 -6 174.183 18.3731 3
 11 5 -6 151.649 17.9143 3
 -11 5 6 182.721 19.1584 1
 -11 5 6 150.769 15.1637 3
 -10 -5 6 120.643 15.595 3
 -10 -5 6 121.469 16.464 3
 10 -5 -6 120.227 15.4994 3
 -10 -5 6 101.443 8.86327 1
 10 -5 -6 125.67 16.495 3
 10 5 -6 122.357 14.7619 3
 10 5 -6 121.737 16.7376 3
 -10 5 6 135.183 13.9401 3
 -10 5 6 116.211 13.4412 3
 -10 5 6 127.36 17.0515 1
 -9 -5 6 352.935 18.8919 3
 -9 -5 6 354.479 23.6192 3
 9 -5 -6 372.836 18.4255 3
 -9 -5 6 370.727 11.7994 1
 9 -5 -6 390.79 21.08 1
 9 -5 -6 359.264 19.4051 3
 -9 5 6 352.653 17.5156 3
 -9 5 6 383.396 20.1045 1
 -9 5 6 326.162 19.719 3
 9 5 -6 342.671 23.6128 3
 9 5 -6 357.566 19.4012 3
 8 -5 -6 28.1189 9.79239 1
 -8 -5 6 33.349 8.6875 3
 8 -5 -6 37.0537 8.67569 3
 -8 -5 6 40.8752 12.4471 3
 8 -5 -6 46.3503 9.15846 3
 -8 5 6 36.4604 9.17958 3
 8 5 -6 29.8756 11.0445 3
 -8 5 6 35.6618 8.25342 3
 -8 5 6 27.5772 9.56312 1
 8 5 -6 22.2579 8.76436 3
 7 -5 -6 414.271 19.2237 3
 -7 -5 6 399.176 18.6024 3
 7 -5 -6 374.524 21.0638 3
 7 -5 -6 422.401 20.1935 1
 7 5 -6 411.859 22.0799 3
 -7 5 6 390.19 18.8518 1
 7 5 -6 324.819 27.9326 3
 -7 5 6 413.27 17.2886 3
 7 5 -6 406.54 18.0816 2
 -7 5 6 357.718 19.5055 3
 -6 -5 6 2.5264 6.93264 3
 -6 -5 6 6.66528 7.00885 3
 6 -5 -6 3.13686 6.91792 3
 6 -5 -6 10.4923 7.80018 1
 6 -5 -6 9.39291 7.49919 3
 6 5 -6 8.87718 7.0997 2
 6 5 -6 -3.0887 9.41863 3
 -6 5 6 3.27136 7.59495 1
 -6 5 6 3.52009 7.8904 3
 6 5 -6 3.17118 7.58417 3
 -5 -5 6 200.717 13.4766 3
 5 -5 -6 190.701 14.4983 3
 -5 -5 6 211.523 14.4815 3
 5 -5 -6 205.068 14.0932 1
 5 -5 -6 216.417 13.5826 3
 -5 5 6 181.521 17.0319 3
 -5 5 6 184.798 14.7477 3
 5 5 -6 184.083 17.5677 3
 5 5 -6 196.77 12.7552 2
 5 5 -6 197.096 14.8144 3
 4 -5 -6 93.9189 11.6313 3
 4 -5 -6 82.7054 11.4815 1
 -4 -5 6 106.492 11.3982 3
 4 -5 -6 92.2335 11.3914 3
 -4 -5 6 91.7004 12.5163 3
 4 5 -6 84.6314 10.2289 2
 4 5 -6 85.6432 9.79297 3
 -4 5 6 80.3476 9.37782 3
 -4 5 6 93.4525 11.0308 3
 4 5 -6 86.5277 11.2583 3
 3 -5 -6 -3.8225 6.73492 3
 -3 -5 6 3.34332 6.87572 3
 3 -5 -6 5.6112 6.00817 3
 -3 -5 6 4.12208 6.43211 3
 3 -5 -6 1.76142 6.37813 1
 3 5 -6 3.44118 7.00126 3
 -3 5 6 8.01209 6.62982 3
 3 5 -6 1.6004 5.56515 2
 3 5 -6 5.45364 8.8339 3
 -3 5 6 5.19093 8.21136 3
 2 -5 -6 216.399 13.6244 3
 -2 -5 6 221.5 13.8698 3
 -2 -5 6 201.014 13.0689 3
 2 -5 -6 209.793 12.5995 3
 2 -5 -6 204.724 12.0096 1
 2 5 -6 203.487 14.4311 3
 -2 5 6 224.162 16.407 3
 2 5 -6 218.866 17.2379 3
 2 5 -6 182.452 11.2288 2
 -2 5 6 204.411 13.6934 3
 1 -5 -6 53.2105 8.28447 3
 -1 -5 6 51.6703 8.36363 3
 -1 -5 6 35.1968 7.43041 3
 1 -5 -6 34.5527 6.83589 1
 1 -5 -6 59.4831 7.65932 3
 1 5 -6 52.9205 10.0548 3
 -1 5 6 53.1502 8.10596 3
 -1 5 6 54.2789 9.95737 3
 1 5 -6 57.7504 8.39674 3
 1 5 -6 50.9091 6.85382 2
 0 -5 6 135.134 9.94151 2
 0 -5 -6 143.58 11.7196 3
 0 -5 -6 137.178 10.3751 1
 0 -5 6 140.237 12.037 3
 0 -5 -6 147.438 12.7669 3
 0 -5 6 135.498 13.0783 3
 0 5 -6 156.341 10.4511 2
 0 5 -6 142.451 13.7183 3
 0 5 6 136.663 14.9335 3
 0 5 -6 136.379 6.63615 1
 0 5 6 114.502 12.5934 3
 -1 -5 -6 98.0403 12.0707 3
 1 -5 6 102.962 12.8733 3
 -1 -5 -6 87.967 9.68799 1
 1 -5 6 82.1655 11.3439 3
 -1 -5 -6 89.7623 11.6242 3
 1 -5 6 94.3355 9.36944 2
 1 5 6 93.8597 11.6196 3
 -1 5 -6 99.0348 7.14629 1
 1 5 6 111.219 13.0183 3
 -1 5 -6 96.9505 13.0191 3
 -1 5 -6 94.4683 11.4933 3
 2 -5 6 518.643 17.1276 2
 -2 -5 -6 507.108 23.3512 3
 -2 -5 -6 492.539 19.6457 3
 2 -5 6 507.08 19.6021 3
 2 -5 6 524.747 21.014 3
 2 5 6 507.887 20.7218 3
 -2 5 -6 513.141 20.9881 3
 2 5 6 500.439 23.0154 3
 -2 5 -6 500.966 19.3101 3
 -2 5 -6 515.543 16.2221 1
 -3 -5 -6 18.5566 9.56423 3
 -3 -5 -6 -3.4014 6.70405 3
 3 -5 6 -1.7684 6.89635 3
 3 -5 6 -0.5347 5.78498 2
 3 -5 6 -11.038 7.13579 3
 -3 5 -6 -0.4506 7.78753 3
 -3 5 -6 -3.1177 6.70947 3
 3 5 6 10.4996 10.189 3
 -3 5 -6 -1.5037 5.08381 1
 3 5 6 7.5544 7.74456 3
 -4 -5 -6 594.851 22.9117 3
 4 -5 6 591.013 22.6762 3
 -4 -5 -6 592.963 26.7162 3
 4 -5 6 638.886 23.9432 3
 4 -5 6 632.376 20.1633 2
 -4 5 -6 594.002 24.1431 3
 -4 5 -6 629.955 22.3593 3
 4 5 6 611.211 23.2191 3
 -4 5 -6 595.247 19.925 1
 4 5 6 603.21 25.704 3
 5 -5 6 1.52966 6.67939 2
 -5 -5 -6 -0.592 7.30452 3
 -5 -5 -6 1.55865 10.4361 3
 5 -5 6 0.17734 7.88613 3
 5 -5 6 9.15313 8.16884 3
 5 5 6 8.8102 8.54267 3
 -5 5 -6 5.15648 8.97323 3
 5 5 6 -17.787 9.47759 3
 -5 5 -6 -8.8861 6.07994 1
 -5 5 -6 -4.7784 7.19533 3
 -6 -5 -6 94.7122 14.2175 3
 6 -5 6 125.635 14.8522 3
 6 -5 6 97.4298 12.276 3
 6 -5 6 125.888 12.6673 2
 -6 -5 -6 106.381 11.6756 3
 6 5 6 98.4956 11.965 3
 6 5 6 81.4878 12.5628 3
 -6 5 -6 90.4114 12.2624 3
 -6 5 -6 94.446 10.2047 1
 -6 5 -6 125.018 14.3287 3
 -7 -5 -6 100.572 11.6463 3
 7 -5 6 88.8859 11.7374 3
 7 -5 6 111.722 13.3923 3
 7 -5 6 90.1936 10.3365 2
 -7 -5 -6 102.188 15.0974 3
 7 5 6 86.4753 13.3637 3
 -7 5 -6 115.014 12.0793 3
 7 5 6 93.9514 12.0727 3
 -7 5 -6 92.4805 12.6381 3
 -7 5 -6 100.975 10.9079 1
 -8 -5 -6 61.2285 14.7156 3
 8 -5 6 35.8535 11.9626 3
 8 -5 6 38.022 10.1509 2
 -8 -5 -6 44.1076 10.7018 3
 8 -5 6 44.2488 10.4897 3
 -8 5 -6 53.1249 11.3368 1
 -8 5 -6 45.0919 10.8763 3
 -8 5 -6 51.4982 12.7104 3
 8 5 6 34.6828 10.5884 3
 8 5 6 43.7467 14.2435 3
 -9 -5 -6 8.38344 13.0656 3
 -9 -5 -6 15.0698 10.6892 3
 9 -5 6 12.6876 10.7996 3
 9 -5 6 6.45301 11.5692 3
 9 5 6 -17.57 12.784 3
 -9 5 -6 21.5198 10.3709 3
 -9 5 -6 20.143 9.70842 1
 -9 5 -6 25.0241 12.1643 3
 9 5 6 11.116 13.1867 3
 10 -5 6 57.2131 12.16 3
 -10 -5 -6 73.4073 16.151 3
 10 -5 6 66.4096 13.7248 3
 -10 -5 -6 72.5538 13.5637 3
 10 5 6 51.8823 12.4129 3
 -10 5 -6 63.6505 13.1344 3
 -10 5 -6 49.8508 14.6433 3
 10 5 6 87.5223 16.1566 3
 -10 5 -6 64.4231 12.1971 1
 11 -5 6 -4.7787 12.2608 3
 -11 -5 -6 -7.4606 10.9911 3
 -11 -5 -6 36.2149 17.2604 3
 11 -5 6 5.84933 13.1349 3
 11 5 6 -1.2166 11.9255 3
 11 5 6 25.1465 16.023 3
 -11 5 -6 -12.219 11.7967 3
 -11 5 -6 1.6921 14.1418 3
 -11 5 -6 25.8837 11.1079 1
 12 -5 6 14.6404 13.3489 3
 -12 -5 -6 28.9455 17.6609 3
 -12 -5 -6 -6.6297 12.5334 3
 12 -5 6 -16.269 14.199 3
 -12 5 -6 0.08277 15.9213 3
 -12 5 -6 21.8476 12.5984 1
 -12 5 -6 -11.113 12.8924 3
 12 5 6 20.2504 13.7513 3
 12 5 6 -7.7252 15.715 3
 -13 -5 -6 47.6526 20.14 3
 13 -5 6 50.8224 14.8464 3
 13 -5 6 -0.0273 17.5931 3
 -13 -5 -6 23.1792 14.2706 3
 -13 5 -6 24.3019 14.9819 3
 13 5 6 45.6875 23.507 3
 -13 5 -6 24.8325 18.1828 3
 13 5 6 23.1429 15.4735 3
 -13 5 -6 54.3425 14.3179 1
 12 -6 -6 32.3448 12.6244 3
 12 -6 -6 14.9529 12.7014 3
 -12 -6 6 29.9547 12.4736 3
 -12 -6 6 48.216 18.507 3
 12 6 -6 29.7499 18.3977 3
 -12 6 6 38.36 11.5285 3
 12 6 -6 30.7791 13.5638 3
 -12 6 6 30.1663 14.6844 1
 -12 6 6 17.2639 15.216 3
 11 -6 -6 32.3763 12.4074 3
 -11 -6 6 12.1315 16.5013 3
 11 -6 -6 5.14781 10.7577 3
 -11 -6 6 -7.928 10.9635 3
 -11 6 6 25.6122 13.283 3
 -11 6 6 3.72094 13.1484 1
 11 6 -6 17.631 15.8254 3
 11 6 -6 0.82353 12.1236 3
 -11 6 6 12.0652 10.3069 3
 10 -6 -6 20.7561 9.9354 3
 10 -6 -6 4.04194 11.0436 3
 -10 -6 6 -4.219 10.0757 3
 -10 6 6 17.7725 10.3052 3
 -10 6 6 32.5581 12.0298 3
 10 6 -6 14.4529 11.2917 3
 10 6 -6 27.5459 13.9143 3
 10 6 -6 23.2608 10.6312 2
 -10 6 6 11.0484 11.225 1
 -9 -6 6 -14.27 9.46946 3
 9 -6 -6 -10.289 8.86322 3
 9 -6 -6 0.78413 10.208 3
 9 6 -6 -14.241 12.1308 3
 9 6 -6 -8.608 9.23557 2
 -9 6 6 -15.172 9.94984 1
 -9 6 6 -0.6121 10.4948 3
 -9 6 6 22.7377 9.10448 3
 9 6 -6 -25.676 9.41833 3
 8 -6 -6 4.99928 10.5826 1
 8 -6 -6 21.1398 10.4278 3
 -8 -6 6 1.9479 9.00063 3
 -8 -6 6 -0.516 9.25728 3
 8 -6 -6 -6.1781 9.07136 3
 8 6 -6 3.48391 12.9731 3
 8 6 -6 2.21609 9.6161 3
 -8 6 6 3.16327 9.51089 1
 -8 6 6 0.58083 10.0973 3
 8 6 -6 12.2755 9.07457 2
 7 -6 -6 4.4629 9.26963 3
 7 -6 -6 -8.6249 9.12462 1
 -7 -6 6 -7.4528 8.24084 3
 7 -6 -6 -3.8959 8.81255 3
 -7 -6 6 -6.2132 8.87928 3
 -7 6 6 2.02559 11.382 3
 -7 6 6 15.2017 10.2843 3
 -7 6 6 3.46837 9.12191 1
 7 6 -6 -6.7071 9.08172 3
 7 6 -6 16.8452 12.6473 3
 -6 -6 6 58.7287 10.4359 3
 6 -6 -6 83.9002 11.4239 3
 6 -6 -6 73.1216 10.3659 3
 -6 -6 6 77.1135 10.7304 3
 6 -6 -6 53.9452 11.0008 1
 6 6 -6 73.5951 10.01 2
 6 6 -6 77.8766 13.587 3
 -6 6 6 45.1803 12.67 3
 -6 6 6 77.5092 11.7828 3
 6 6 -6 75.6407 11.1901 3
 5 -6 -6 5.99123 8.31234 1
 5 -6 -6 4.52795 8.45136 3
 -5 -6 6 1.96789 8.38428 3
 5 -6 -6 -5.7542 8.34935 3
 -5 -6 6 7.33054 8.62384 3
 5 6 -6 2.90102 7.5842 2
 5 6 -6 7.22568 8.97357 3
 5 6 -6 1.50695 11.6041 3
 -5 6 6 11.211 10.7848 3
 -5 6 6 -11.755 9.23926 3
 4 -6 -6 38.4411 9.55665 3
 -4 -6 6 36.9037 9.35922 3
 -4 -6 6 36.893 10.2438 3
 4 -6 -6 63.0532 9.54686 1
 4 -6 -6 52.5654 12.6446 3
 4 6 -6 31.0023 7.70784 2
 4 6 -6 67.0225 12.9107 3
 -4 6 6 40.5793 9.9852 3
 -4 6 6 32.3949 11.6791 3
 4 6 -6 48.6304 10.2791 3
 -3 -6 6 48.109 9.67754 3
 3 -6 -6 51.7217 9.03729 1
 -3 -6 6 40.6011 9.22369 3
 3 -6 -6 49.2823 9.05578 3
 3 -6 -6 35.5982 9.72463 3
 3 6 -6 32.3143 9.46764 3
 3 6 -6 40.6512 12.2195 3
 -3 6 6 55.2289 10.1332 3
 3 6 -6 35.5551 7.45103 2
 -3 6 6 59.7042 12.2498 3
 2 -6 -6 14.1716 8.35695 3
 -2 -6 6 3.57585 7.7208 3
 2 -6 -6 3.62605 7.22001 1
 2 -6 -6 5.66716 7.93558 3
 -2 -6 6 8.51044 8.37246 3
 -2 6 6 1.69025 12.677 3
 -2 6 6 1.64911 8.14052 3
 2 6 -6 11.6927 11.0751 3
 2 6 -6 3.59775 6.87236 2
 2 6 -6 -5.0595 8.22111 3
 -1 -6 6 9.72896 8.71365 3
 -1 -6 6 4.06231 7.6575 3
 1 -6 -6 9.37813 7.51335 3
 1 -6 -6 -10.236 7.37526 3
 1 -6 -6 3.12286 6.68959 1
 -1 6 6 0.68062 10.2418 3
 -1 6 6 2.15599 8.43508 3
 1 6 -6 -6.8192 6.57421 2
 1 6 -6 0.00569 8.36521 3
 1 6 -6 6.32613 9.99029 3
 0 -6 -6 15.7532 6.93424 1
 0 -6 6 21.4687 8.7349 3
 0 -6 -6 13.7991 7.83162 3
 0 -6 -6 14.5326 8.56078 3
 0 -6 6 21.9487 8.29134 3
 0 6 -6 13.8148 9.62978 3
 0 6 -6 18.1675 11.1128 3
 0 6 6 10.2541 9.82507 3
 0 6 6 15.0322 8.5889 3
 0 6 -6 11.3573 6.72724 2
 -1 -6 -6 52.3654 9.65011 3
 1 -6 6 37.6602 9.18492 3
 1 -6 6 59.9095 7.32382 2
 -1 -6 -6 60.7485 9.28542 3
 -1 -6 -6 50.5029 7.83134 1
 1 -6 6 46.2322 9.43287 3
 -1 6 -6 56.1122 11.0154 3
 1 6 6 33.3985 11.6758 3
 -1 6 -6 47.5641 5.66845 1
 1 6 6 42.803 9.73557 3
 2 -6 6 46.9189 7.25457 2
 -2 -6 -6 47.0892 7.3061 1
 2 -6 6 53.4257 9.58637 3
 -2 -6 -6 48.7378 9.00853 3
 2 -6 6 38.1879 9.20836 3
 -2 6 -6 37.7851 10.5036 3
 -2 6 -6 52.9653 6.37297 1
 2 6 6 46.9427 12.3189 3
 -2 6 -6 47.1927 9.30871 3
 2 6 6 36.8237 9.73941 3
 3 -6 6 191.956 16.8959 3
 -3 -6 -6 190.83 16.5615 3
 3 -6 6 185.637 12.169 2
 -3 -6 -6 173.126 20.911 3
 3 -6 6 184.109 15.8969 3
 3 6 6 173.876 21.4351 3
 -3 6 -6 187.676 11.4595 1
 3 6 6 139.198 16.8604 3
 -3 6 -6 214.826 16.4172 3
 -3 6 -6 174.937 17.7698 3
 -4 -6 -6 2.80845 12.5895 3
 -4 -6 -6 -2.051 8.36032 3
 4 -6 6 4.3451 6.69994 2
 4 -6 6 -4.1779 9.05424 3
 4 -6 6 0.37313 8.95273 3
 4 6 6 0.15538 9.03527 3
 -4 6 -6 -3.0454 10.392 3
 4 6 6 -10.408 11.2335 3
 -4 6 -6 0.62096 6.32866 1
 -4 6 -6 4.58913 9.05903 3
 -5 -6 -6 -3.7416 10.645 3
 -5 -6 -6 -1.1254 9.20907 3
 5 -6 6 11.4042 9.5783 3
 5 -6 6 10.3724 7.32799 2
 5 -6 6 -0.5124 8.95444 3
 -5 6 -6 3.93268 7.45531 1
 5 6 6 16.7645 12.2823 3
 5 6 6 4.06178 9.66761 3
 -5 6 -6 6.98763 9.15222 3
 -5 6 -6 12.6165 10.1337 3
 -6 -6 -6 -8.4347 9.57259 3
 6 -6 6 1.98288 10.2431 3
 -6 -6 -6 22.0607 13.9172 3
 6 -6 6 1.98643 9.40729 3
 6 -6 6 1.28158 8.02832 2
 -6 6 -6 18.7837 11.1753 3
 -6 6 -6 0.40013 7.92281 1
 6 6 6 13.9578 10.2996 3
 6 6 6 -4.7869 11.9265 3
 7 -6 6 3.39934 10.1494 3
 7 -6 6 13.3115 9.2873 2
 7 -6 6 8.60945 10.9755 3
 -7 -6 -6 8.29455 13.1897 3
 -7 -6 -6 0.42639 14.3781 3
 -7 6 -6 21.4911 12.3514 3
 7 6 6 29.2706 14.7113 3
 7 6 6 8.63163 10.7568 3
 -7 6 -6 12.4904 10.0556 3
 -7 6 -6 2.43715 14.1856 1
 8 -6 6 32.2865 13.2983 3
 -8 -6 -6 -5.5889 10.5275 3
 8 -6 6 8.28984 10.8001 3
 8 -6 6 7.1223 9.93241 2
[truncated: 857,942 more chars]
