# Supplementary material
Source: MDPI journal article supplement (https://www.mdpi.com/2304-6740/6/1/5)
Supplement: s1 [file s1 › CIF&CHECKCIF/Complex-5.cif]

data_test
_audit_creation_date              2017-05-03
_audit_creation_method
;
Olex2 1.2
(compiled 2016.02.16 svn.r3265 for OlexSys, GUI svn.r5155)
;
_shelxl_version_number            2013-4
_publ_contact_author_address      ?
_publ_contact_author_email        ?
_publ_contact_author_name         ''
_publ_contact_author_phone        ?
_publ_section_references
;
Dolomanov, O.V., Bourhis, L.J., Gildea, R.J, Howard, J.A.K. & Puschmann, H.
 (2009), J. Appl. Cryst. 42, 339-341.

Sheldrick, G.M. (2008). Acta Cryst. A64, 112-122.

Sheldrick, G.M. (2015). Acta Cryst. C71, 3-8.
;
_chemical_name_common             ?
_chemical_name_systematic
;
 ?
;
_chemical_formula_moiety          'C28 H24 Cl Fe2 N2 O3, 0.5(C2 H3 N)'
_chemical_formula_sum             'C29 H25.50 Cl Fe2 N2.50 O3'
_chemical_formula_weight          604.17
_chemical_melting_point           ?
loop_
  _atom_type_symbol
  _atom_type_description
  _atom_type_scat_dispersion_real
  _atom_type_scat_dispersion_imag
  _atom_type_scat_source
 'C' 'C' 0.0033 0.0016 'International Tables Vol C Tables 4.2.6.8 and 6.1.1.4'
 'H' 'H' 0.0000 0.0000 'International Tables Vol C Tables 4.2.6.8 and 6.1.1.4'
 'Cl' 'Cl' 0.1484 0.1585 'International Tables Vol C Tables 4.2.6.8 and 6.1.1.4'
 'Fe' 'Fe' 0.3463 0.8444 'International Tables Vol C Tables 4.2.6.8 and 6.1.1.4'
 'N' 'N' 0.0061 0.0033 'International Tables Vol C Tables 4.2.6.8 and 6.1.1.4'
 'O' 'O' 0.0106 0.0060 'International Tables Vol C Tables 4.2.6.8 and 6.1.1.4'

_shelx_space_group_comment
;
The symmetry employed for this shelxl refinement is uniquely defined
by the following loop, which should always be used as a source of
symmetry information in preference to the above space-group names.
They are only intended as comments.
;
_space_group_crystal_system       'orthorhombic'
_space_group_IT_number            61
_space_group_name_H-M_alt         'P b c a'
_space_group_name_Hall            '-P 2ac 2ab'
loop_
  _space_group_symop_operation_xyz
 'x, y, z'
 '-x+1/2, -y, z+1/2'
 'x+1/2, -y+1/2, -z'
 '-x, y+1/2, -z+1/2'
 '-x, -y, -z'
 'x-1/2, y, -z-1/2'
 '-x-1/2, y-1/2, z'
 'x, -y-1/2, z-1/2'

_cell_length_a                    17.1576(10)
_cell_length_b                    13.8793(10)
_cell_length_c                    23.1768(17)
_cell_angle_alpha                 90
_cell_angle_beta                  90
_cell_angle_gamma                 90
_cell_volume                      5519.2(7)
_cell_formula_units_Z             8
_cell_measurement_reflns_used     9978
_cell_measurement_temperature     296(2)
_cell_measurement_theta_max       24.94
_cell_measurement_theta_min       2.58
_shelx_estimated_absorpt_T_max    0.895
_shelx_estimated_absorpt_T_min    0.849
_exptl_absorpt_coefficient_mu     1.182
_exptl_absorpt_correction_T_max   0.7454
_exptl_absorpt_correction_T_min   0.6192
_exptl_absorpt_correction_type    multi-scan
_exptl_absorpt_process_details
;
SADABS-2014/5 (Bruker,2014) was used for absorption correction.
wR2(int) was 0.0659 before and 0.0578 after correction.
The Ratio of minimum to maximum transmission is 0.8307.
The \l/2 correction factor is 0.00150.
;
_exptl_crystal_colour             'dark orange'
_exptl_crystal_density_diffrn     1.454
_exptl_crystal_density_meas       ?
_exptl_crystal_density_method     ?
_exptl_crystal_description        block
_exptl_crystal_F_000              2480
_exptl_crystal_size_max           0.143
_exptl_crystal_size_mid           0.114
_exptl_crystal_size_min           0.096
_exptl_special_details
;
 ?
;
_exptl_transmission_factor_max    ?
_exptl_transmission_factor_min    ?
_diffrn_reflns_av_R_equivalents   0.0890
_diffrn_reflns_av_unetI/netI      0.0278
_diffrn_reflns_Laue_measured_fraction_full 0.994
_diffrn_reflns_Laue_measured_fraction_max 0.994
_diffrn_reflns_limit_h_max        20
_diffrn_reflns_limit_h_min        -21
_diffrn_reflns_limit_k_max        17
_diffrn_reflns_limit_k_min        -17
_diffrn_reflns_limit_l_max        28
_diffrn_reflns_limit_l_min        -28
_diffrn_reflns_number             98249
_diffrn_reflns_point_group_measured_fraction_full 0.994
_diffrn_reflns_point_group_measured_fraction_max 0.994
_diffrn_reflns_theta_full         26.000
_diffrn_reflns_theta_max          26.378
_diffrn_reflns_theta_min          2.579
_diffrn_ambient_temperature       296(2)
_diffrn_detector_area_resol_mean  ?
_diffrn_measured_fraction_theta_full 0.994
_diffrn_measured_fraction_theta_max 0.994
_diffrn_measurement_device_type   'Bruker APEX-II CCD'
_diffrn_measurement_method        '\f and \w scans'
_diffrn_radiation_type            MoK\a
_diffrn_radiation_wavelength      0.71073
_diffrn_source                    ?
_diffrn_standards_number          0
_reflns_Friedel_coverage          0.000
_reflns_Friedel_fraction_full     .
_reflns_Friedel_fraction_max      .
_reflns_number_gt                 4311
_reflns_number_total              5616
_reflns_special_details
;
 Reflections were merged by SHELXL according to the crystal
 class for the calculation of statistics and refinement.
 
 _reflns_Friedel_fraction is defined as the number of unique
 Friedel pairs measured divided by the number that would be
 possible theoretically, ignoring centric projections and
 systematic absences.
;
_reflns_threshold_expression      'I > 2\s(I)'
_computing_cell_refinement        'SAINT v8.34A (Bruker, 2013)'
_computing_data_collection        ?
_computing_data_reduction         'SAINT v8.34A (Bruker, 2013)'
_computing_molecular_graphics     'Olex2 (Dolomanov et al., 2009)'
_computing_publication_material   'Olex2 (Dolomanov et al., 2009)'
_computing_structure_refinement   'ShelXL (Sheldrick, 2015)'
_computing_structure_solution     'XS (Sheldrick, 2008)'
_refine_diff_density_max          1.417
_refine_diff_density_min          -0.967
_refine_diff_density_rms          0.160
_refine_ls_extinction_coef        .
_refine_ls_extinction_method      none
_refine_ls_goodness_of_fit_ref    1.170
_refine_ls_hydrogen_treatment     constr
_refine_ls_matrix_type            full
_refine_ls_number_parameters      326
_refine_ls_number_reflns          5616
_refine_ls_number_restraints      0
_refine_ls_R_factor_all           0.1473
_refine_ls_R_factor_gt            0.1190
_refine_ls_restrained_S_all       1.170
_refine_ls_shift/su_max           0.003
_refine_ls_shift/su_mean          0.000
_refine_ls_structure_factor_coef  Fsqd
_refine_ls_weighting_details
'w=1/[\s^2^(Fo^2^)+(0.1000P)^2^+70.4450P] where P=(Fo^2^+2Fc^2^)/3'
_refine_ls_weighting_scheme       calc
_refine_ls_wR_factor_gt           0.2982
_refine_ls_wR_factor_ref          0.3191
_refine_special_details
;
 ?
;
_olex2_refinement_description
;
1. Fixed Uiso
 At 1.2 times of:
  All C(H) groups
 At 1.5 times of:
  All C(H,H,H) groups
2. Uiso/Uaniso restraints and constraints
Uanis(C2) = Uanis(C1) = Uanis(C5) = Uanis(C4) = Uanis(C3) = Uanis(C1A) =
Uanis(C2A) = Uanis(C3A) = Uanis(C4A) = Uanis(C5A)
3. Others
 Sof(C1A)=Sof(H4AB)=Sof(C2A)=Sof(H0AB)=Sof(C3A)=Sof(H1AB)=Sof(C4A)=Sof(H2AB)=
 Sof(C5A)=Sof(H3AB)=1-FVAR(1)
 Sof(C2)=Sof(H2)=Sof(C1)=Sof(H1)=Sof(C5)=Sof(H5)=Sof(C4)=Sof(H4)=Sof(C3)=
 Sof(H3)=FVAR(1)
 Fixed Sof: N1S(0.5) C1S(0.5) C2S(0.5) H4A(0.5) H4B(0.5) H4C(0.5)
4.a Free rotating group:
 N1S(C1S,C2S)
4.b Ternary CH refined with riding coordinates:
 C2A(H0AB)
4.c Aromatic/amide H refined with riding coordinates:
 C26(H26), C19(H19), C21(H21), C16(H16), C9(H9), C6(H6), C12(H12), C8(H8),
 C18(H18), C17(H17), C25(H25), C7(H7), C2(H2), C1(H1), C5(H5), C4(H4), C3(H3),
 C24(H24), C1A(H4AB), C3A(H1AB), C4A(H2AB), C5A(H3AB)
4.d Fitted pentagon refined as free rotating group:
 C2(C1,C5,C4,C3), C1A(C2A,C3A,C4A,C5A)
4.e Idealised Me refined as rotating group:
 C14(H14A,H14B,H14C), C28(H28A,H28B,H28C), C2S(H4A,H4B,H4C)
;
_atom_sites_solution_hydrogens    geom
_atom_sites_solution_primary      direct
_atom_sites_solution_secondary    ?
loop_
  _atom_site_label
  _atom_site_type_symbol
  _atom_site_fract_x
  _atom_site_fract_y
  _atom_site_fract_z
  _atom_site_U_iso_or_equiv
  _atom_site_adp_type
  _atom_site_occupancy
  _atom_site_site_symmetry_order
  _atom_site_calc_flag
  _atom_site_refinement_flags_posn
  _atom_site_refinement_flags_adp
  _atom_site_refinement_flags_occupancy
  _atom_site_disorder_assembly
  _atom_site_disorder_group
 Fe1 Fe 0.06512(7) 0.66671(8) 0.24851(6) 0.0359(4) Uani 1 1 d . . . . .
 Fe2 Fe 0.21563(10) 0.91214(12) 0.12158(7) 0.0563(5) Uani 1 1 d . . . . .
 Cl1 Cl -0.03906(15) 0.70641(18) 0.30084(14) 0.0574(7) Uani 1 1 d . . . . .
 O2 O 0.0431(4) 0.6557(4) 0.1694(3) 0.0417(14) Uani 1 1 d . . . . .
 O1 O 0.1144(4) 0.7901(4) 0.2385(3) 0.0461(16) Uani 1 1 d . . . . .
 N2 N 0.0527(4) 0.5193(5) 0.2540(3) 0.0389(17) Uani 1 1 d . . . . .
 N1 N 0.1605(4) 0.6265(5) 0.2975(3) 0.0395(17) Uani 1 1 d . . . . .
 C22 C -0.0153(5) 0.4965(6) 0.1645(4) 0.0379(19) Uani 1 1 d . . . . .
 C26 C -0.0595(6) 0.4299(7) 0.1319(5) 0.049(2) Uani 1 1 d . . . . .
 H26 H -0.0706 0.3681 0.1474 0.059 Uiso 1 1 calc R . . . .
 C10 C 0.2127(5) 0.8998(6) 0.2081(4) 0.040(2) Uani 1 1 d . . . . .
 C19 C 0.0653(6) 0.3945(7) 0.3310(5) 0.050(2) Uani 1 1 d . . . . .
 H19 H 0.0260 0.3550 0.3144 0.060 Uiso 1 1 calc R . . . .
 C15 C 0.1457(6) 0.5401(7) 0.3282(4) 0.045(2) Uani 1 1 d . . . . .
 C23 C 0.0026(5) 0.5865(7) 0.1413(4) 0.042(2) Uani 1 1 d . . . . .
 C21 C 0.0139(5) 0.4638(6) 0.2188(4) 0.0372(19) Uani 1 1 d . . . . .
 H21 H 0.0047 0.3988 0.2297 0.045 Uiso 1 1 calc R . . . .
 C13 C 0.2314(6) 0.6625(7) 0.2919(5) 0.048(2) Uani 1 1 d . . . . .
 C11 C 0.1892(6) 0.8096(7) 0.2376(4) 0.040(2) Uani 1 1 d . . . . .
 C20 C 0.0871(5) 0.4815(6) 0.3046(4) 0.0372(19) Uani 1 1 d . . . . .
 O3 O -0.1324(6) 0.3948(7) 0.0442(4) 0.082(3) Uani 1 1 d . . . . .
 C16 C 0.1791(7) 0.5104(8) 0.3805(5) 0.059(3) Uani 1 1 d . . . . .
 H16 H 0.2169 0.5503 0.3985 0.071 Uiso 1 1 calc R . . . .
 C9 C 0.1612(7) 0.9736(7) 0.1896(5) 0.056(3) Uani 1 1 d . . . . .
 H9 H 0.1065 0.9753 0.1957 0.067 Uiso 1 1 calc R . . . .
 C6 C 0.2882(7) 0.9226(10) 0.1890(6) 0.069(3) Uani 1 1 d . . . . .
 H6 H 0.3340 0.8849 0.1933 0.082 Uiso 1 1 calc R . . . .
 C27 C -0.0862(7) 0.4535(9) 0.0785(5) 0.058(3) Uani 1 1 d . . . . .
 C12 C 0.2433(6) 0.7518(7) 0.2630(5) 0.049(2) Uani 1 1 d . . . . .
 H12 H 0.2957 0.7737 0.2611 0.058 Uiso 1 1 calc R . . . .
 C8 C 0.2053(7) 1.0437(8) 0.1610(7) 0.072(4) Uani 1 1 d . . . . .
 H8 H 0.1857 1.1012 0.1441 0.087 Uiso 1 1 calc R . . . .
 C18 C 0.1023(8) 0.3672(8) 0.3819(5) 0.065(3) Uani 1 1 d . . . . .
 H18 H 0.0885 0.3081 0.3999 0.078 Uiso 1 1 calc R . . . .
 C17 C 0.1586(8) 0.4246(9) 0.4063(5) 0.066(3) Uani 1 1 d . . . . .
 H17 H 0.1834 0.4052 0.4411 0.079 Uiso 1 1 calc R . . . .
 C25 C -0.0646(7) 0.5415(9) 0.0535(5) 0.059(3) Uani 1 1 d . . . . .
 H25 H -0.0798 0.5556 0.0150 0.071 Uiso 1 1 calc R . . . .
 C14 C 0.3027(6) 0.6143(8) 0.3136(6) 0.061(3) Uani 1 1 d . . . . .
 H14A H 0.3107 0.6311 0.3543 0.091 Uiso 1 1 calc GR . . . .
 H14B H 0.3478 0.6356 0.2910 0.091 Uiso 1 1 calc GR . . . .
 H14C H 0.2969 0.5443 0.3100 0.091 Uiso 1 1 calc GR . . . .
 C7 C 0.2815(8) 1.0149(9) 0.1616(7) 0.081(4) Uani 1 1 d . . . . .
 H7 H 0.3238 1.0507 0.1462 0.097 Uiso 1 1 calc R . . . .
 C2 C 0.2512(11) 0.8939(18) 0.0373(9) 0.096(3) Uani 0.67(2) 1 d . . P A 1
 H2 H 0.2921 0.9282 0.0188 0.115 Uiso 0.67(2) 1 calc R . P A 1
 C1 C 0.2592(12) 0.8065(19) 0.0686(9) 0.096(3) Uani 0.67(2) 1 d G . P A 1
 H1 H 0.3063 0.7720 0.0747 0.115 Uiso 0.67(2) 1 calc R . P A 1
 C5 C 0.1843(17) 0.7795(12) 0.0891(8) 0.096(3) Uani 0.67(2) 1 d G . P A 1
 H5 H 0.1726 0.7239 0.1114 0.115 Uiso 0.67(2) 1 calc R . P A 1
 C4 C 0.1301(8) 0.850(2) 0.0705(9) 0.096(3) Uani 0.67(2) 1 d G . P A 1
 H4 H 0.0757 0.8503 0.0782 0.115 Uiso 0.67(2) 1 calc R . P A 1
 C3 C 0.1714(14) 0.9210(13) 0.0385(9) 0.096(3) Uani 0.67(2) 1 d G . P A 1
 H3 H 0.1495 0.9766 0.0210 0.115 Uiso 0.67(2) 1 calc R . P A 1
 C24 C -0.0220(6) 0.6068(8) 0.0839(4) 0.050(2) Uani 1 1 d . . . . .
 H24 H -0.0087 0.6666 0.0666 0.060 Uiso 1 1 calc R . . . .
 C28 C -0.1519(11) 0.3031(11) 0.0680(7) 0.104(6) Uani 1 1 d . . . . .
 H28A H -0.1870 0.2690 0.0416 0.156 Uiso 1 1 calc GR . . . .
 H28B H -0.1778 0.3122 0.1053 0.156 Uiso 1 1 calc GR . . . .
 H28C H -0.1043 0.2652 0.0735 0.156 Uiso 1 1 calc GR . . . .
 N1S N -0.0713(19) 0.773(2) -0.0181(12) 0.154(16) Uani 0.5 1 d . . P B -1
 C1S C -0.0413(12) 0.8387(17) -0.0395(8) 0.080(8) Uani 0.5 1 d G . P B -1
 C2S C -0.0037(17) 0.921(2) -0.0663(12) 0.095(10) Uani 0.5 1 d G . P B -1
 H4A H -0.0271 0.9331 -0.1042 0.142 Uiso 0.5 1 calc GR . P B -1
 H4B H 0.0520 0.9082 -0.0709 0.142 Uiso 0.5 1 calc GR . P B -1
 H4C H -0.0108 0.9782 -0.0418 0.142 Uiso 0.5 1 calc GR . P B -1
 C1A C 0.229(3) 0.780(2) 0.0830(18) 0.096(3) Uani 0.33(2) 1 d . . P A 2
 H4AB H 0.2462 0.7218 0.1011 0.115 Uiso 0.33(2) 1 calc R . P A 2
 C2A C 0.2779(17) 0.852(4) 0.059(2) 0.096(3) Uani 0.33(2) 1 d G . P A 2
 H0AB H 0.3361 0.8502 0.0573 0.115 Uiso 0.33(2) 1 calc R . P A 2
 C3A C 0.229(3) 0.926(3) 0.0368(18) 0.096(3) Uani 0.33(2) 1 d G . P A 2
 H1AB H 0.2466 0.9834 0.0184 0.115 Uiso 0.33(2) 1 calc R . P A 2
 C4A C 0.151(2) 0.899(3) 0.046(2) 0.096(3) Uani 0.33(2) 1 d G . P A 2
 H2AB H 0.1059 0.9350 0.0356 0.115 Uiso 0.33(2) 1 calc R . P A 2
 C5A C 0.151(3) 0.808(4) 0.0750(19) 0.096(3) Uani 0.33(2) 1 d G . P A 2
 H3AB H 0.1057 0.7733 0.0866 0.115 Uiso 0.33(2) 1 calc R . P A 2

loop_
  _atom_site_aniso_label
  _atom_site_aniso_U_11
  _atom_site_aniso_U_22
  _atom_site_aniso_U_33
  _atom_site_aniso_U_23
  _atom_site_aniso_U_13
  _atom_site_aniso_U_12
 Fe1 0.0300(6) 0.0240(6) 0.0537(8) 0.0029(5) -0.0046(5) -0.0002(5)
 Fe2 0.0511(9) 0.0551(9) 0.0627(10) 0.0097(8) 0.0067(7) -0.0081(7)
 Cl1 0.0419(13) 0.0402(12) 0.090(2) -0.0010(13) 0.0148(13) 0.0019(10)
 O2 0.048(4) 0.025(3) 0.052(4) 0.005(3) -0.003(3) -0.001(3)
 O1 0.033(3) 0.034(3) 0.071(5) 0.007(3) -0.003(3) -0.004(3)
 N2 0.030(4) 0.031(4) 0.056(5) 0.008(3) -0.002(3) 0.003(3)
 N1 0.042(4) 0.026(3) 0.051(4) 0.000(3) -0.009(3) -0.001(3)
 C22 0.036(5) 0.035(4) 0.042(5) -0.005(4) -0.009(4) 0.010(4)
 C26 0.049(6) 0.036(5) 0.061(6) -0.011(4) -0.007(5) -0.004(4)
 C10 0.039(5) 0.031(4) 0.051(5) 0.005(4) -0.007(4) -0.005(4)
 C19 0.056(6) 0.032(5) 0.062(6) 0.007(4) -0.007(5) -0.004(4)
 C15 0.051(6) 0.036(5) 0.047(5) 0.002(4) -0.008(4) 0.000(4)
 C23 0.034(5) 0.043(5) 0.049(5) 0.003(4) 0.004(4) 0.006(4)
 C21 0.035(4) 0.026(4) 0.051(5) -0.002(4) -0.002(4) -0.002(3)
 C13 0.039(5) 0.038(5) 0.066(6) 0.005(5) -0.012(4) 0.002(4)
 C11 0.043(5) 0.037(5) 0.042(5) -0.004(4) 0.002(4) -0.007(4)
 C20 0.044(5) 0.025(4) 0.043(5) -0.004(3) -0.005(4) 0.005(3)
 O3 0.100(7) 0.073(6) 0.074(6) -0.016(5) -0.036(5) -0.007(5)
 C16 0.065(7) 0.054(6) 0.058(6) 0.003(5) -0.021(6) -0.003(5)
 C9 0.049(6) 0.039(5) 0.080(8) 0.012(5) 0.015(5) 0.004(4)
 C6 0.042(6) 0.071(8) 0.093(9) 0.014(7) -0.008(6) -0.017(6)
 C27 0.057(6) 0.064(7) 0.053(6) -0.013(5) -0.009(5) 0.002(5)
 C12 0.036(5) 0.040(5) 0.070(7) 0.005(5) -0.011(5) -0.009(4)
 C8 0.063(7) 0.037(6) 0.117(11) 0.020(7) 0.002(7) -0.005(5)
 C18 0.089(9) 0.039(5) 0.068(7) 0.016(5) -0.009(7) -0.006(6)
 C17 0.086(9) 0.057(7) 0.054(7) 0.016(5) -0.003(6) 0.007(6)
 C25 0.065(7) 0.070(7) 0.042(5) -0.005(5) -0.006(5) 0.010(6)
 C14 0.038(5) 0.056(6) 0.088(8) 0.019(6) -0.019(5) 0.002(5)
 C7 0.060(7) 0.050(7) 0.132(13) 0.030(8) -0.012(8) -0.030(6)
 C2 0.107(8) 0.109(9) 0.072(5) 0.003(5) 0.007(6) -0.020(7)
 C1 0.107(8) 0.109(9) 0.072(5) 0.003(5) 0.007(6) -0.020(7)
 C5 0.107(8) 0.109(9) 0.072(5) 0.003(5) 0.007(6) -0.020(7)
 C4 0.107(8) 0.109(9) 0.072(5) 0.003(5) 0.007(6) -0.020(7)
 C3 0.107(8) 0.109(9) 0.072(5) 0.003(5) 0.007(6) -0.020(7)
 C24 0.053(6) 0.050(6) 0.048(6) 0.000(5) -0.004(5) 0.004(5)
 C28 0.129(14) 0.076(10) 0.108(13) -0.030(9) -0.034(11) -0.032(10)
 N1S 0.17(4) 0.19(4) 0.10(2) 0.01(3) -0.01(2) -0.07(3)
 C1S 0.083(19) 0.10(2) 0.056(15) -0.003(15) -0.006(13) -0.009(17)
 C2S 0.09(2) 0.11(2) 0.09(2) 0.003(19) -0.004(17) -0.026(19)
 C1A 0.107(8) 0.109(9) 0.072(5) 0.003(5) 0.007(6) -0.020(7)
 C2A 0.107(8) 0.109(9) 0.072(5) 0.003(5) 0.007(6) -0.020(7)
 C3A 0.107(8) 0.109(9) 0.072(5) 0.003(5) 0.007(6) -0.020(7)
 C4A 0.107(8) 0.109(9) 0.072(5) 0.003(5) 0.007(6) -0.020(7)
 C5A 0.107(8) 0.109(9) 0.072(5) 0.003(5) 0.007(6) -0.020(7)

_geom_special_details
;
 All esds (except the esd in the dihedral angle between two l.s. planes)
 are estimated using the full covariance matrix.  The cell esds are taken
 into account individually in the estimation of esds in distances, angles
 and torsion angles; correlations between esds in cell parameters are only
 used when they are defined by crystal symmetry.  An approximate (isotropic)
 treatment of cell esds is used for estimating esds involving l.s. planes.
;
loop_
  _geom_bond_atom_site_label_1
  _geom_bond_atom_site_label_2
  _geom_bond_distance
  _geom_bond_site_symmetry_2
  _geom_bond_publ_flag
 Fe1 Cl1 2.229(3) . ?
 Fe1 O2 1.877(7) . ?
 Fe1 O1 1.925(6) . ?
 Fe1 N2 2.060(7) . ?
 Fe1 N1 2.068(8) . ?
 Fe2 C10 2.014(10) . ?
 Fe2 C9 2.022(11) . ?
 Fe2 C6 2.003(13) . ?
 Fe2 C8 2.049(13) . ?
 Fe2 C7 2.043(13) . ?
 Fe2 C2 2.06(2) . ?
 Fe2 C1 2.05(2) . ?
 Fe2 C5 2.06(2) . ?
 Fe2 C4 2.07(2) . ?
 Fe2 C1A 2.06(4) . ?
 Fe2 C2A 1.98(4) . ?
 Fe2 C3A 1.99(4) . ?
 O2 C23 1.353(11) . ?
 O1 C11 1.311(11) . ?
 N2 C21 1.305(11) . ?
 N2 C20 1.414(11) . ?
 N1 C15 1.417(12) . ?
 N1 C13 1.321(12) . ?
 C22 C26 1.415(12) . ?
 C22 C23 1.395(13) . ?
 C22 C21 1.428(12) . ?
 C26 H26 0.9500 . ?
 C26 C27 1.359(15) . ?
 C10 C11 1.482(12) . ?
 C10 C9 1.418(14) . ?
 C10 C6 1.406(15) . ?
 C19 H19 0.9500 . ?
 C19 C20 1.404(13) . ?
 C19 C18 1.392(15) . ?
 C15 C20 1.403(13) . ?
 C15 C16 1.404(14) . ?
 C23 C24 1.424(14) . ?
 C21 H21 0.9500 . ?
 C13 C12 1.423(14) . ?
 C13 C14 1.483(13) . ?
 C11 C12 1.361(14) . ?
 O3 C27 1.388(13) . ?
 O3 C28 1.427(18) . ?
 C16 H16 0.9500 . ?
 C16 C17 1.378(16) . ?
 C9 H9 0.9500 . ?
 C9 C8 1.400(15) . ?
 C6 H6 0.9500 . ?
 C6 C7 1.434(17) . ?
 C27 C25 1.401(17) . ?
 C12 H12 0.9500 . ?
 C8 H8 0.9500 . ?
 C8 C7 1.367(18) . ?
 C18 H18 0.9500 . ?
 C18 C17 1.375(17) . ?
 C17 H17 0.9500 . ?
 C25 H25 0.9500 . ?
 C25 C24 1.361(15) . ?
 C14 H14A 0.9800 . ?
 C14 H14B 0.9800 . ?
 C14 H14C 0.9800 . ?
 C7 H7 0.9500 . ?
 C2 H2 0.9500 . ?
 C2 C1 1.4200 . ?
 C2 C3 1.4200 . ?
 C1 H1 0.9500 . ?
 C1 C5 1.4200 . ?
 C5 H5 0.9500 . ?
 C5 C4 1.4200 . ?
 C4 H4 0.9500 . ?
 C4 C3 1.4200 . ?
 C3 H3 0.9500 . ?
 C24 H24 0.9500 . ?
 C28 H28A 0.9800 . ?
 C28 H28B 0.9800 . ?
 C28 H28C 0.9800 . ?
 N1S C1S 1.1624 . ?
 C1S C2S 1.4539 . ?
 C2S H4A 0.9800 . ?
 C2S H4B 0.9800 . ?
 C2S H4C 0.9800 . ?
 C1A H4AB 0.9500 . ?
 C1A C2A 1.4200 . ?
 C1A C5A 1.4200 . ?
 C2A H0AB 1.0000 . ?
 C2A C3A 1.4200 . ?
 C3A H1AB 0.9500 . ?
 C3A C4A 1.4200 . ?
 C4A H2AB 0.9500 . ?
 C4A C5A 1.4200 . ?
 C5A H3AB 0.9500 . ?

loop_
  _geom_angle_atom_site_label_1
  _geom_angle_atom_site_label_2
  _geom_angle_atom_site_label_3
  _geom_angle
  _geom_angle_site_symmetry_1
  _geom_angle_site_symmetry_3
  _geom_angle_publ_flag
 O2 Fe1 Cl1 112.9(2) . . ?
 O2 Fe1 O1 92.4(3) . . ?
 O2 Fe1 N2 87.7(3) . . ?
 O2 Fe1 N1 132.3(3) . . ?
 O1 Fe1 Cl1 101.4(2) . . ?
 O1 Fe1 N2 159.5(3) . . ?
 O1 Fe1 N1 87.6(3) . . ?
 N2 Fe1 Cl1 97.4(2) . . ?
 N2 Fe1 N1 77.3(3) . . ?
 N1 Fe1 Cl1 113.7(2) . . ?
 C10 Fe2 C9 41.2(4) . . ?
 C10 Fe2 C8 68.3(5) . . ?
 C10 Fe2 C7 67.7(5) . . ?
 C10 Fe2 C2 160.2(8) . . ?
 C10 Fe2 C1 123.0(6) . . ?
 C10 Fe2 C5 106.3(5) . . ?
 C10 Fe2 C4 121.0(6) . . ?
 C10 Fe2 C1A 111.0(10) . . ?
 C9 Fe2 C8 40.2(4) . . ?
 C9 Fe2 C7 66.8(6) . . ?
 C9 Fe2 C2 158.1(8) . . ?
 C9 Fe2 C1 159.4(8) . . ?
 C9 Fe2 C5 122.8(7) . . ?
 C9 Fe2 C4 107.1(6) . . ?
 C9 Fe2 C1A 140.2(15) . . ?
 C6 Fe2 C10 41.0(4) . . ?
 C6 Fe2 C9 69.4(5) . . ?
 C6 Fe2 C8 69.0(6) . . ?
 C6 Fe2 C7 41.5(5) . . ?
 C6 Fe2 C2 124.3(7) . . ?
 C6 Fe2 C1 107.0(6) . . ?
 C6 Fe2 C5 120.8(8) . . ?
 C6 Fe2 C4 156.3(8) . . ?
 C6 Fe2 C1A 109.5(12) . . ?
 C8 Fe2 C2 123.9(7) . . ?
 C8 Fe2 C1 159.1(9) . . ?
 C8 Fe2 C5 159.5(9) . . ?
 C8 Fe2 C4 124.2(8) . . ?
 C8 Fe2 C1A 178.3(15) . . ?
 C7 Fe2 C8 39.0(5) . . ?
 C7 Fe2 C2 110.6(6) . . ?
 C7 Fe2 C1 124.7(8) . . ?
 C7 Fe2 C5 159.1(9) . . ?
 C7 Fe2 C4 160.2(9) . . ?
 C7 Fe2 C1A 139.4(16) . . ?
 C2 Fe2 C4 67.5(5) . . ?
 C1 Fe2 C2 40.4(4) . . ?
 C1 Fe2 C5 40.4(4) . . ?
 C1 Fe2 C4 67.7(5) . . ?
 C5 Fe2 C2 67.8(4) . . ?
 C5 Fe2 C4 40.2(3) . . ?
 C2A Fe2 C10 134.7(14) . . ?
 C2A Fe2 C9 174.6(11) . . ?
 C2A Fe2 C6 105.2(11) . . ?
 C2A Fe2 C8 138.3(16) . . ?
 C2A Fe2 C7 109.0(13) . . ?
 C2A Fe2 C1A 41.1(7) . . ?
 C2A Fe2 C3A 42.0(8) . . ?
 C3A Fe2 C10 174.6(14) . . ?
 C3A Fe2 C9 141.7(15) . . ?
 C3A Fe2 C6 133.6(14) . . ?
 C3A Fe2 C8 111.4(12) . . ?
 C3A Fe2 C7 108.4(11) . . ?
 C3A Fe2 C1A 69.2(9) . . ?
 C23 O2 Fe1 129.2(6) . . ?
 C11 O1 Fe1 128.0(6) . . ?
 C21 N2 Fe1 126.9(6) . . ?
 C21 N2 C20 120.8(7) . . ?
 C20 N2 Fe1 112.1(6) . . ?
 C15 N1 Fe1 111.2(6) . . ?
 C13 N1 Fe1 125.0(6) . . ?
 C13 N1 C15 122.3(8) . . ?
 C26 C22 C21 116.8(9) . . ?
 C23 C22 C26 119.8(9) . . ?
 C23 C22 C21 123.2(8) . . ?
 C22 C26 H26 119.7 . . ?
 C27 C26 C22 120.6(10) . . ?
 C27 C26 H26 119.7 . . ?
 C11 C10 Fe2 122.5(6) . . ?
 C9 C10 Fe2 69.7(6) . . ?
 C9 C10 C11 125.5(9) . . ?
 C6 C10 Fe2 69.1(7) . . ?
 C6 C10 C11 125.9(9) . . ?
 C6 C10 C9 108.4(9) . . ?
 C20 C19 H19 120.6 . . ?
 C18 C19 H19 120.6 . . ?
 C18 C19 C20 118.8(10) . . ?
 C20 C15 N1 115.1(8) . . ?
 C20 C15 C16 117.3(9) . . ?
 C16 C15 N1 127.5(9) . . ?
 O2 C23 C22 124.2(8) . . ?
 O2 C23 C24 117.6(9) . . ?
 C22 C23 C24 118.2(9) . . ?
 N2 C21 C22 122.8(8) . . ?
 N2 C21 H21 118.6 . . ?
 C22 C21 H21 118.6 . . ?
 N1 C13 C12 120.5(8) . . ?
 N1 C13 C14 123.8(9) . . ?
 C12 C13 C14 115.7(9) . . ?
 O1 C11 C10 116.6(8) . . ?
 O1 C11 C12 122.6(9) . . ?
 C12 C11 C10 120.8(8) . . ?
 C19 C20 N2 124.7(8) . . ?
 C15 C20 N2 114.0(8) . . ?
 C15 C20 C19 121.3(9) . . ?
 C27 O3 C28 115.8(10) . . ?
 C15 C16 H16 119.2 . . ?
 C17 C16 C15 121.6(11) . . ?
 C17 C16 H16 119.2 . . ?
 Fe2 C9 H9 125.5 . . ?
 C10 C9 Fe2 69.1(6) . . ?
 C10 C9 H9 126.0 . . ?
 C8 C9 Fe2 70.9(7) . . ?
 C8 C9 C10 108.0(10) . . ?
 C8 C9 H9 126.0 . . ?
 Fe2 C6 H6 123.8 . . ?
 C10 C6 Fe2 69.9(6) . . ?
 C10 C6 H6 127.3 . . ?
 C10 C6 C7 105.5(11) . . ?
 C7 C6 Fe2 70.7(8) . . ?
 C7 C6 H6 127.3 . . ?
 C26 C27 O3 125.0(11) . . ?
 C26 C27 C25 119.9(10) . . ?
 O3 C27 C25 115.2(10) . . ?
 C13 C12 H12 115.9 . . ?
 C11 C12 C13 128.2(9) . . ?
 C11 C12 H12 115.9 . . ?
 Fe2 C8 H8 126.5 . . ?
 C9 C8 Fe2 68.8(7) . . ?
 C9 C8 H8 126.0 . . ?
 C7 C8 Fe2 70.2(8) . . ?
 C7 C8 C9 108.0(11) . . ?
 C7 C8 H8 126.0 . . ?
 C19 C18 H18 119.6 . . ?
 C17 C18 C19 120.8(10) . . ?
 C17 C18 H18 119.6 . . ?
 C16 C17 H17 120.0 . . ?
 C18 C17 C16 120.1(11) . . ?
 C18 C17 H17 120.0 . . ?
 C27 C25 H25 119.7 . . ?
 C24 C25 C27 120.5(10) . . ?
 C24 C25 H25 119.7 . . ?
 C13 C14 H14A 109.5 . . ?
 C13 C14 H14B 109.5 . . ?
 C13 C14 H14C 109.5 . . ?
 H14A C14 H14B 109.5 . . ?
 H14A C14 H14C 109.5 . . ?
 H14B C14 H14C 109.5 . . ?
 Fe2 C7 H7 128.1 . . ?
 C6 C7 Fe2 67.8(7) . . ?
 C6 C7 H7 125.0 . . ?
 C8 C7 Fe2 70.7(8) . . ?
 C8 C7 C6 110.0(11) . . ?
 C8 C7 H7 125.0 . . ?
 Fe2 C2 H2 125.7 . . ?
 C1 C2 Fe2 69.5(8) . . ?
 C1 C2 H2 126.0 . . ?
 C1 C2 C3 108.0 . . ?
 C3 C2 Fe2 70.3(8) . . ?
 C3 C2 H2 126.0 . . ?
 Fe2 C1 H1 125.4 . . ?
 C2 C1 Fe2 70.1(8) . . ?
 C2 C1 H1 126.0 . . ?
 C2 C1 C5 108.0 . . ?
 C5 C1 Fe2 70.0(8) . . ?
 C5 C1 H1 126.0 . . ?
 Fe2 C5 H5 125.7 . . ?
 C1 C5 Fe2 69.6(8) . . ?
 C1 C5 H5 126.0 . . ?
 C4 C5 Fe2 70.3(8) . . ?
 C4 C5 C1 108.0 . . ?
 C4 C5 H5 126.0 . . ?
 Fe2 C4 H4 126.1 . . ?
 C5 C4 Fe2 69.5(8) . . ?
 C5 C4 H4 126.0 . . ?
 C5 C4 C3 108.0 . . ?
 C3 C4 Fe2 70.0(8) . . ?
 C3 C4 H4 126.0 . . ?
 Fe2 C3 H3 126.2 . . ?
 C2 C3 Fe2 69.5(8) . . ?
 C2 C3 C4 108.0 . . ?
 C2 C3 H3 126.0 . . ?
 C4 C3 Fe2 69.9(8) . . ?
 C4 C3 H3 126.0 . . ?
 C23 C24 H24 119.6 . . ?
 C25 C24 C23 120.7(10) . . ?
 C25 C24 H24 119.6 . . ?
 O3 C28 H28A 109.5 . . ?
 O3 C28 H28B 109.5 . . ?
 O3 C28 H28C 109.5 . . ?
 H28A C28 H28B 109.5 . . ?
 H28A C28 H28C 109.5 . . ?
 H28B C28 H28C 109.5 . . ?
 N1S C1S C2S 179.98(9) . . ?
 C1S C2S H4A 109.5 . . ?
 C1S C2S H4B 109.5 . . ?
 C1S C2S H4C 109.5 . . ?
 H4A C2S H4B 109.5 . . ?
 H4A C2S H4C 109.5 . . ?
 H4B C2S H4C 109.5 . . ?
 Fe2 C1A H4AB 126.7 . . ?
 C2A C1A Fe2 66.3(15) . . ?
 C2A C1A H4AB 126.0 . . ?
 C5A C1A Fe2 72.4(16) . . ?
 C5A C1A H4AB 126.0 . . ?
 C5A C1A C2A 108.0 . . ?
 Fe2 C2A H0AB 126.0 . . ?
 C1A C2A Fe2 72.5(16) . . ?
 C1A C2A H0AB 126.0 . . ?
 C3A C2A Fe2 69.5(17) . . ?
 C3A C2A C1A 108.0 . . ?
 C3A C2A H0AB 126.0 . . ?
 Fe2 C3A H1AB 124.1 . . ?
 C2A C3A Fe2 68.6(16) . . ?
 C2A C3A H1AB 126.0 . . ?
 C2A C3A C4A 108.0 . . ?
 C4A C3A Fe2 72.9(16) . . ?
 C4A C3A H1AB 126.0 . . ?
 Fe2 C4A H2AB 127.5 . . ?
 C3A C4A Fe2 66.3(15) . . ?
 C3A C4A H2AB 126.0 . . ?
 C5A C4A Fe2 71.8(15) . . ?
 C5A C4A C3A 108.0 . . ?
 C5A C4A H2AB 126.0 . . ?
 Fe2 C5A H3AB 129.1 . . ?
 C1A C5A Fe2 67.9(15) . . ?
 C1A C5A C4A 108.0 . . ?
 C1A C5A H3AB 126.0 . . ?
 C4A C5A Fe2 68.6(15) . . ?
 C4A C5A H3AB 126.0 . . ?

loop_
  _geom_torsion_atom_site_label_1
  _geom_torsion_atom_site_label_2
  _geom_torsion_atom_site_label_3
  _geom_torsion_atom_site_label_4
  _geom_torsion
  _geom_torsion_site_symmetry_1
  _geom_torsion_site_symmetry_2
  _geom_torsion_site_symmetry_3
  _geom_torsion_site_symmetry_4
  _geom_torsion_publ_flag
 Fe1 O2 C23 C22 -16.2(13) . . . . ?
 Fe1 O2 C23 C24 164.9(7) . . . . ?
 Fe1 O1 C11 C10 157.6(7) . . . . ?
 Fe1 O1 C11 C12 -23.5(14) . . . . ?
 Fe1 N2 C21 C22 11.2(13) . . . . ?
 Fe1 N2 C20 C19 155.6(8) . . . . ?
 Fe1 N2 C20 C15 -23.1(10) . . . . ?
 Fe1 N1 C15 C20 23.1(10) . . . . ?
 Fe1 N1 C15 C16 -152.6(10) . . . . ?
 Fe1 N1 C13 C12 18.3(14) . . . . ?
 Fe1 N1 C13 C14 -160.6(9) . . . . ?
 Fe2 C10 C11 O1 -76.0(10) . . . . ?
 Fe2 C10 C11 C12 105.0(10) . . . . ?
 Fe2 C10 C9 C8 -60.6(9) . . . . ?
 Fe2 C10 C6 C7 62.2(10) . . . . ?
 Fe2 C9 C8 C7 -59.5(12) . . . . ?
 Fe2 C6 C7 C8 58.1(12) . . . . ?
 Fe2 C8 C7 C6 -56.4(11) . . . . ?
 Fe2 C2 C1 C5 60.1(7) . . . . ?
 Fe2 C2 C3 C4 -59.5(8) . . . . ?
 Fe2 C1 C5 C4 60.1(8) . . . . ?
 Fe2 C5 C4 C3 59.6(8) . . . . ?
 Fe2 C4 C3 C2 59.3(8) . . . . ?
 Fe2 C1A C2A C3A -60.7(16) . . . . ?
 Fe2 C1A C5A C4A 56.9(15) . . . . ?
 Fe2 C2A C3A C4A -62.7(16) . . . . ?
 Fe2 C3A C4A C5A -59.9(16) . . . . ?
 Fe2 C4A C5A C1A -56.5(15) . . . . ?
 Cl1 Fe1 O2 C23 -72.1(7) . . . . ?
 O2 C23 C24 C25 -178.4(9) . . . . ?
 O1 Fe1 O2 C23 -175.6(7) . . . . ?
 O1 C11 C12 C13 2.4(17) . . . . ?
 N2 Fe1 O2 C23 25.0(7) . . . . ?
 N1 Fe1 O2 C23 95.4(8) . . . . ?
 N1 C15 C20 N2 -0.1(12) . . . . ?
 N1 C15 C20 C19 -179.0(9) . . . . ?
 N1 C15 C16 C17 179.0(11) . . . . ?
 N1 C13 C12 C11 -0.9(18) . . . . ?
 C22 C26 C27 O3 -177.3(10) . . . . ?
 C22 C26 C27 C25 5.2(17) . . . . ?
 C22 C23 C24 C25 2.5(15) . . . . ?
 C26 C22 C23 O2 178.6(9) . . . . ?
 C26 C22 C23 C24 -2.4(13) . . . . ?
 C26 C22 C21 N2 -177.1(9) . . . . ?
 C26 C27 C25 C24 -5.1(17) . . . . ?
 C10 C11 C12 C13 -178.7(10) . . . . ?
 C10 C9 C8 Fe2 59.4(8) . . . . ?
 C10 C9 C8 C7 -0.1(17) . . . . ?
 C10 C6 C7 Fe2 -61.7(8) . . . . ?
 C10 C6 C7 C8 -3.5(18) . . . . ?
 C19 C18 C17 C16 0(2) . . . . ?
 C15 N1 C13 C12 -177.2(9) . . . . ?
 C15 N1 C13 C14 4.0(16) . . . . ?
 C15 C16 C17 C18 -2(2) . . . . ?
 C23 C22 C26 C27 -1.5(15) . . . . ?
 C23 C22 C21 N2 7.8(14) . . . . ?
 C21 N2 C20 C19 -20.1(14) . . . . ?
 C21 N2 C20 C15 161.1(8) . . . . ?
 C21 C22 C26 C27 -176.7(10) . . . . ?
 C21 C22 C23 O2 -6.4(14) . . . . ?
 C21 C22 C23 C24 172.5(9) . . . . ?
 C13 N1 C15 C20 -143.4(10) . . . . ?
 C13 N1 C15 C16 40.9(16) . . . . ?
 C11 C10 C9 Fe2 -116.2(10) . . . . ?
 C11 C10 C9 C8 -176.7(10) . . . . ?
 C11 C10 C6 Fe2 115.7(10) . . . . ?
 C11 C10 C6 C7 178.0(10) . . . . ?
 C20 N2 C21 C22 -173.7(8) . . . . ?
 C20 C19 C18 C17 0.7(18) . . . . ?
 C20 C15 C16 C17 3.4(17) . . . . ?
 O3 C27 C25 C24 177.2(11) . . . . ?
 C16 C15 C20 N2 176.0(9) . . . . ?
 C16 C15 C20 C19 -2.8(15) . . . . ?
 C9 C10 C11 O1 11.1(15) . . . . ?
 C9 C10 C11 C12 -167.8(10) . . . . ?
 C9 C10 C6 Fe2 -58.8(8) . . . . ?
 C9 C10 C6 C7 3.4(14) . . . . ?
 C9 C8 C7 Fe2 58.7(10) . . . . ?
 C9 C8 C7 C6 2.3(19) . . . . ?
 C6 C10 C11 O1 -162.5(11) . . . . ?
 C6 C10 C11 C12 18.5(16) . . . . ?
 C6 C10 C9 Fe2 58.5(8) . . . . ?
 C6 C10 C9 C8 -2.1(14) . . . . ?
 C27 C25 C24 C23 1.2(17) . . . . ?
 C18 C19 C20 N2 -177.9(10) . . . . ?
 C18 C19 C20 C15 0.8(16) . . . . ?
 C14 C13 C12 C11 178.0(11) . . . . ?
 C2 C1 C5 Fe2 -60.1(8) . . . . ?
 C2 C1 C5 C4 0.0 . . . . ?
 C1 C2 C3 Fe2 59.5(8) . . . . ?
 C1 C2 C3 C4 0.0 . . . . ?
 C1 C5 C4 Fe2 -59.6(8) . . . . ?
 C1 C5 C4 C3 0.0 . . . . ?
 C5 C4 C3 Fe2 -59.3(8) . . . . ?
 C5 C4 C3 C2 0.0 . . . . ?
 C3 C2 C1 Fe2 -60.1(7) . . . . ?
 C3 C2 C1 C5 0.0 . . . . ?
 C28 O3 C27 C26 -0.3(19) . . . . ?
 C28 O3 C27 C25 177.2(13) . . . . ?
 C1A C2A C3A Fe2 62.7(16) . . . . ?
 C1A C2A C3A C4A 0.0 . . . . ?
 C2A C1A C5A Fe2 -56.9(15) . . . . ?
 C2A C1A C5A C4A 0.0 . . . . ?
 C2A C3A C4A Fe2 59.9(16) . . . . ?
 C2A C3A C4A C5A 0.0 . . . . ?
 C3A C4A C5A Fe2 56.5(15) . . . . ?
 C3A C4A C5A C1A 0.0 . . . . ?
 C5A C1A C2A Fe2 60.7(16) . . . . ?
 C5A C1A C2A C3A 0.0 . . . . ?

_iucr_refine_instructions_details
;
TITL test in Pbca #61
REM reset to Pbca #61
CELL 0.71073 17.1576 13.8793 23.1768 90 90 90
ZERR 8 0.001 0.001 0.0017 0 0 0
LATT 1
SYMM 0.5-X,-Y,0.5+Z
SYMM 0.5+X,0.5-Y,-Z
SYMM -X,0.5+Y,0.5-Z
SFAC C H Cl Fe N O
UNIT 232 204 8 16 20 24
EADP C2 C1 C5 C4 C3 C1A C2A C3A C4A C5A
 
L.S. 10
PLAN  10
SIZE 0.096 0.114 0.143
TEMP -273.15
BOND
MORE -1
BOND $H
CONF
fmap 2
acta 52
OMIT 0 2 14
OMIT 10 4 0
OMIT 3 8 2
OMIT 3 4 11
OMIT 2 6 1
OMIT 2 7 13
OMIT 5 2 12
OMIT 4 1 11
OMIT 1 2 12
OMIT 1 4 11
OMIT 10 4 2
OMIT 4 4 0
OMIT 0 8 0
OMIT 3 6 1
OMIT 6 4 0
OMIT 6 8 0
OMIT 11 1 2
OMIT 4 15 0
OMIT 0 4 13
OMIT 4 2 12
OMIT 2 7 11
OMIT 4 3 0
OMIT 4 15 2
OMIT 6 13 1
REM <olex2.extras>
REM <HklSrc "%./test2.hkl">
REM </olex2.extras>
 
WGHT    0.100000   70.445000
FVAR       0.07154   0.66985
FE1   4    0.065117    0.666706    0.248512    11.00000    0.02998    0.02402 =
         0.05365    0.00289   -0.00459   -0.00021
FE2   4    0.215628    0.912144    0.121577    11.00000    0.05110    0.05506 =
         0.06274    0.00973    0.00669   -0.00806
CL1   3   -0.039060    0.706409    0.300845    11.00000    0.04194    0.04016 =
         0.09009   -0.00097    0.01478    0.00194
O2    6    0.043094    0.655746    0.169437    11.00000    0.04776    0.02490 =
         0.05244    0.00530   -0.00346   -0.00119
O1    6    0.114423    0.790138    0.238480    11.00000    0.03294    0.03397 =
         0.07140    0.00747   -0.00343   -0.00396
N2    5    0.052692    0.519343    0.254015    11.00000    0.03037    0.03061 =
         0.05585    0.00753   -0.00158    0.00293
N1    5    0.160495    0.626505    0.297465    11.00000    0.04174    0.02579 =
         0.05103    0.00008   -0.00851   -0.00140
C22   1   -0.015305    0.496522    0.164521    11.00000    0.03635    0.03525 =
         0.04214   -0.00530   -0.00885    0.01021
C26   1   -0.059481    0.429913    0.131888    11.00000    0.04896    0.03617 =
         0.06121   -0.01118   -0.00679   -0.00417
AFIX  43
H26   2   -0.070610    0.368089    0.147429    11.00000   -1.20000
AFIX   0
C10   1    0.212655    0.899812    0.208119    11.00000    0.03942    0.03087 =
         0.05109    0.00525   -0.00750   -0.00503
C19   1    0.065305    0.394523    0.330960    11.00000    0.05600    0.03196 =
         0.06233    0.00661   -0.00736   -0.00445
AFIX  43
H19   2    0.026033    0.355029    0.314360    11.00000   -1.20000
AFIX   0
C15   1    0.145661    0.540105    0.328162    11.00000    0.05097    0.03631 =
         0.04674    0.00159   -0.00819   -0.00002
C23   1    0.002622    0.586520    0.141278    11.00000    0.03361    0.04340 =
         0.04859    0.00310    0.00369    0.00581
C21   1    0.013903    0.463811    0.218804    11.00000    0.03514    0.02566 =
         0.05094   -0.00205   -0.00153   -0.00191
AFIX  43
H21   2    0.004696    0.398836    0.229745    11.00000   -1.20000
AFIX   0
C13   1    0.231384    0.662549    0.291928    11.00000    0.03940    0.03770 =
         0.06599    0.00504   -0.01240    0.00185
C11   1    0.189179    0.809603    0.237585    11.00000    0.04251    0.03722 =
         0.04150   -0.00373    0.00158   -0.00740
C20   1    0.087108    0.481545    0.304608    11.00000    0.04360    0.02544 =
         0.04269   -0.00373   -0.00452    0.00469
O3    6   -0.132379    0.394830    0.044158    11.00000    0.10011    0.07344 =
         0.07365   -0.01617   -0.03615   -0.00732
C16   1    0.179150    0.510362    0.380506    11.00000    0.06538    0.05382 =
         0.05790    0.00337   -0.02108   -0.00286
AFIX  43
H16   2    0.216909    0.550342    0.398549    11.00000   -1.20000
AFIX   0
C9    1    0.161232    0.973643    0.189646    11.00000    0.04894    0.03896 =
         0.08015    0.01218    0.01476    0.00403
AFIX  43
H9    2    0.106480    0.975256    0.195673    11.00000   -1.20000
AFIX   0
C6    1    0.288187    0.922644    0.189007    11.00000    0.04183    0.07139 =
         0.09275    0.01361   -0.00800   -0.01666
AFIX  43
H6    2    0.334007    0.884901    0.193330    11.00000   -1.20000
AFIX   0
C27   1   -0.086155    0.453530    0.078506    11.00000    0.05659    0.06353 =
         0.05342   -0.01277   -0.00869    0.00199
C12   1    0.243292    0.751760    0.262968    11.00000    0.03579    0.03988 =
         0.07043    0.00516   -0.01065   -0.00943
AFIX  43
H12   2    0.295671    0.773734    0.261117    11.00000   -1.20000
AFIX   0
C8    1    0.205314    1.043707    0.160977    11.00000    0.06262    0.03657 =
         0.11725    0.02015    0.00237   -0.00486
AFIX  43
H8    2    0.185737    1.101161    0.144057    11.00000   -1.20000
AFIX   0
C18   1    0.102293    0.367169    0.381867    11.00000    0.08947    0.03863 =
         0.06803    0.01614   -0.00907   -0.00583
AFIX  43
H18   2    0.088468    0.308123    0.399897    11.00000   -1.20000
AFIX   0
C17   1    0.158596    0.424618    0.406349    11.00000    0.08631    0.05701 =
         0.05418    0.01584   -0.00301    0.00672
AFIX  43
H17   2    0.183354    0.405179    0.441115    11.00000   -1.20000
AFIX   0
C25   1   -0.064582    0.541452    0.053495    11.00000    0.06462    0.07028 =
         0.04241   -0.00545   -0.00613    0.00954
AFIX  43
H25   2   -0.079775    0.555569    0.014996    11.00000   -1.20000
AFIX   0
C14   1    0.302743    0.614309    0.313617    11.00000    0.03837    0.05588 =
         0.08758    0.01918   -0.01931    0.00220
AFIX 137
H14A  2    0.310714    0.631137    0.354256    11.00000   -1.50000
H14B  2    0.347788    0.635579    0.290951    11.00000   -1.50000
H14C  2    0.296877    0.544338    0.309973    11.00000   -1.50000
AFIX   0
C7    1    0.281498    1.014898    0.161614    11.00000    0.05961    0.05006 =
         0.13220    0.03015   -0.01203   -0.02965
AFIX  43
H7    2    0.323804    1.050745    0.146172    11.00000   -1.20000
AFIX  56
PART 1
C2    1    0.251185    0.893878    0.037302    21.00000    0.10676    0.10891 =
         0.07171    0.00281    0.00652   -0.02030
AFIX  43
H2    2    0.292058    0.928216    0.018815    21.00000   -1.20000
AFIX  55
C1    1    0.259157    0.806454    0.068576    21.00000    0.10676    0.10891 =
         0.07171    0.00281    0.00652   -0.02030
AFIX  43
H1    2    0.306300    0.772035    0.074686    21.00000   -1.20000
AFIX  55
C5    1    0.184292    0.779510    0.089115    21.00000    0.10676    0.10891 =
         0.07171    0.00281    0.00652   -0.02030
AFIX  43
H5    2    0.172555    0.723900    0.111377    21.00000   -1.20000
AFIX  55
C4    1    0.130051    0.850282    0.070534    21.00000    0.10676    0.10891 =
         0.07171    0.00281    0.00652   -0.02030
AFIX  43
H4    2    0.075654    0.850332    0.078183    21.00000   -1.20000
AFIX  55
C3    1    0.171393    0.920965    0.038512    21.00000    0.10676    0.10891 =
         0.07171    0.00281    0.00652   -0.02030
AFIX  43
H3    2    0.149511    0.976606    0.020977    21.00000   -1.20000
AFIX   0
PART 0
C24   1   -0.022046    0.606808    0.083884    11.00000    0.05302    0.05019 =
         0.04790   -0.00010   -0.00435    0.00438
AFIX  43
H24   2   -0.008655    0.666639    0.066619    11.00000   -1.20000
AFIX   0
C28   1   -0.151882    0.303126    0.068001    11.00000    0.12936    0.07552 =
         0.10753   -0.02996   -0.03392   -0.03209
AFIX 137
H28A  2   -0.186983    0.269020    0.041629    11.00000   -1.50000
H28B  2   -0.177788    0.312189    0.105293    11.00000   -1.50000
H28C  2   -0.104265    0.265208    0.073452    11.00000   -1.50000
AFIX   6
 
PART -1
N1S   5   -0.071308    0.772696   -0.018104    10.50000    0.16900    0.19376 =
         0.09959    0.00894   -0.01143   -0.06742
C1S   1   -0.041279    0.838718   -0.039502    10.50000    0.08265    0.10040 =
         0.05641   -0.00330   -0.00635   -0.00906
C2S   1   -0.003730    0.921291   -0.066290    10.50000    0.08619    0.10612 =
         0.09195    0.00271   -0.00408   -0.02580
AFIX 137
H4A   2   -0.027149    0.933133   -0.104198    10.50000   -1.50000
H4B   2    0.052048    0.908201   -0.070920    10.50000   -1.50000
H4C   2   -0.010779    0.978197   -0.041807    10.50000   -1.50000
AFIX  56
 
PART 0
PART 2
C1A   1    0.229177    0.779565    0.083036   -21.00000    0.10676    0.10891 =
         0.07171    0.00281    0.00652   -0.02030
AFIX  43
H4AB  2    0.246192    0.721801    0.101061   -21.00000   -1.20000
AFIX  55
C2A   1    0.277937    0.852237    0.059437   -21.00000    0.10676    0.10891 =
         0.07171    0.00281    0.00652   -0.02030
AFIX  13
H0AB  2    0.336128    0.850230    0.057323   -21.00000   -1.20000
AFIX  55
C3A   1    0.229416    0.925980    0.036778   -21.00000    0.10676    0.10891 =
         0.07171    0.00281    0.00652   -0.02030
AFIX  43
H1AB  2    0.246618    0.983367    0.018422   -21.00000   -1.20000
AFIX  55
C4A   1    0.150669    0.898884    0.046374   -21.00000    0.10676    0.10891 =
         0.07171    0.00281    0.00652   -0.02030
AFIX  43
H2AB  2    0.105938    0.934961    0.035565   -21.00000   -1.20000
AFIX  55
C5A   1    0.150521    0.808395    0.074963   -21.00000    0.10676    0.10891 =
         0.07171    0.00281    0.00652   -0.02030
AFIX  43
H3AB  2    0.105675    0.773304    0.086639   -21.00000   -1.20000
AFIX   0
HKLF 4
 
REM  test in Pbca #61
REM R1 =  0.1190 for    4311 Fo > 4sig(Fo)  and  0.1473 for all    5616 data
REM    326 parameters refined using      0 restraints
 
END  
     
WGHT      0.0994     70.8464 

REM Highest difference peak  1.417,  deepest hole -0.967,  1-sigma level  0.160
Q1    1  -0.0560  0.6045  0.2868  11.00000  0.05    1.42
Q2    1   0.4379  0.6111  0.2941  11.00000  0.05    1.22
Q3    1   0.2743  0.8435  0.1001  11.00000  0.05    1.16
Q4    1   0.2495  0.9180  0.1474  11.00000  0.05    1.02
Q5    1   0.2725  0.8435  0.1716  11.00000  0.05    0.95
Q6    1   0.0590  0.5609  0.2074  11.00000  0.05    0.89
Q7    1   0.0594  0.6645  0.3302  11.00000  0.05    0.83
Q8    1   0.2241  0.9130  0.0596  11.00000  0.05    0.76
Q9    1   0.0529  0.6384  0.1529  11.00000  0.05    0.69
Q10   1   0.2233  0.3139  0.4053  11.00000  0.05    0.68

  REM The information below was added by Olex2.
  REM
  REM R1 = 0.1190 for 4311 Fo > 4sig(Fo) and 0.1473 for all 103736 data
  REM n/a parameters refined using n/a restraints
  REM Highest difference peak 1.42, deepest hole -0.97
  REM Mean Shift 0, Max Shift 0.003.
  
  REM +++ Tabular Listing of Refinement Information +++
  REM R1_all = 0.1473
  REM R1_gt = 0.1190
  REM wR_ref = 0.3191
  REM GOOF = 1.170
  REM Shift_max = 0.003
  REM Shift_mean = 0
  REM Reflections_all = 103736
  REM Reflections_gt = 4311
  REM Parameters = n/a
  REM Hole = -0.97
  REM Peak = 1.42
  REM Flack = n/a
  
  
;
_olex2_submission_special_instructions 'No special instructions were received'
loop_
  _refln_index_h
  _refln_index_k
  _refln_index_l
  _refln_F_squared_meas
  _refln_F_squared_sigma
 0 -2 0 238.4 5.84
 0 2 0 241.4 5.84
 0 2 0 240.96 5.84
 0 2 0 237.71 5.84
 0 -2 0 240.1 5.84
 0 -2 0 241.68 5.84
 0 3 0 -0.41 0.47
 0 -3 0 0.2 0.46
 0 3 0 0.57 0.39
 0 3 0 0.46 0.42
 0 -3 0 0.34 0.39
 0 -3 0 0.28 0.46
 0 4 0 317.5 7.82
 0 -4 0 319.27 7.82
 0 4 0 326.93 7.83
 0 4 0 314.17 7.83
 0 -4 0 319.72 7.83
 0 -4 0 323.93 7.83
 0 -5 0 -0.99 0.51
 0 -5 0 -0.95 0.49
 0 5 0 0.88 0.43
 0 5 0 0.2 0.46
 0 5 0 0.04 0.51
 0 -5 0 0 0.45
 0 -6 0 2.89 0.6
 0 -6 0 3.31 0.54
 0 6 0 2.07 0.5
 0 6 0 2.54 0.6
 0 7 0 -0.22 0.53
 0 7 0 -0.13 0.61
 0 -7 0 0.18 0.54
 0 7 0 -0.7 0.56
 0 -7 0 0.83 0.61
 0 -8 0 152.32 3.98
 0 8 0 144.12 3.94
 0 8 0 148.66 3.96
 0 8 0 155.3 3.98
 0 -8 0 157.02 3.98
 0 9 0 -0.15 0.7
 0 -9 0 -0.7 0.66
 0 9 0 -0.35 0.59
 0 -9 0 -0.23 0.68
 0 9 0 -0.33 0.64
 0 -10 0 27.9 1.51
 0 10 0 33.15 1.45
 0 10 0 33.52 1.52
 0 -10 0 30.59 1.57
 0 10 0 30.97 1.55
 0 -11 0 -0.42 0.81
 0 11 0 0.99 0.81
 0 -11 0 -0.63 0.81
 0 -11 0 -0.5 0.53
 0 -12 0 22.79 1.27
 0 12 0 18.86 1.69
 0 -12 0 19.33 1.73
 0 -12 0 21.44 1.61
 0 12 0 20.64 1.61
 0 12 0 21.6 1.64
 0 13 0 -0.33 0.97
 0 -13 0 0.27 0.61
 0 -13 0 -0.56 0.99
 0 13 0 -1.5 0.82
 0 -13 0 -1.11 1
 0 13 0 -0.53 1.59
 0 -14 0 3.04 1.13
 0 -14 0 2.65 0.7
 0 14 0 4.11 1.11
 0 14 0 3.12 0.91
 0 -14 0 2.49 1.09
 0 14 0 2.78 1.09
 0 15 0 -1.05 1.12
 0 -15 0 -0.29 0.67
 0 15 0 -0.93 0.97
 0 -15 0 -0.5 1.09
 0 15 0 -2.31 1.14
 0 -16 0 24.62 1.75
 0 -16 0 22.39 1.6
 0 -16 0 24.98 2.13
 0 16 0 27.26 2.17
 0 16 0 24.56 2.19
 0 -17 0 0.9 1.38
 0 17 0 1.4 1.4
 0 17 0 -0.4 1.35
 0 -17 0 0.48 1.26
 0 17 0 0.66 1.24
 0 -17 0 0.84 0.8
 -1 2 0 0.05 0.3
 -1 2 0 0.25 0.25
 1 2 0 -0.22 0.3
 1 -2 0 0.1 0.31
 -1 -2 0 0.13 0.29
 -1 -2 0 0.15 0.28
 1 2 0 0.07 0.3
 1 2 0 -0.24 0.28
 -1 -2 0 0.34 0.27
 -1 2 0 0.01 0.27
 1 -2 0 0 0.3
 1 -3 0 -0.71 0.41
 1 3 0 -0.94 0.45
 1 3 0 -0.68 0.4
 -1 3 0 -1.16 0.46
 -1 -3 0 -0.37 0.47
 -1 -3 0 -0.25 0.42
 1 3 0 -0.85 0.45
 -1 3 0 -0.06 0.41
 -1 -3 0 -0.57 0.44
 1 -3 0 -0.14 0.47
 -1 -4 0 -0.16 0.46
 -1 4 0 -0.13 0.48
 1 -4 0 -0.12 0.47
 1 4 0 0.35 0.48
 1 -4 0 -0.18 0.47
 -1 4 0 0.83 0.41
 -1 -4 0 0.61 0.43
 -1 4 0 0.03 0.44
 1 4 0 0 0.42
 1 4 0 0.11 0.46
 -1 -4 0 -0.8 0.43
 -1 5 0 -0.06 0.49
 1 5 0 -0.25 0.48
 1 -5 0 0.34 0.48
 -1 5 0 -0.23 0.44
 1 5 0 0.47 0.44
 -1 -5 0 -0.12 0.49
 1 5 0 -0.59 0.48
 -1 5 0 -0.31 0.47
 -1 -5 0 0.18 0.44
 1 -5 0 -0.32 0.49
 -1 6 0 -0.65 0.54
 -1 -6 0 0.17 0.51
 -1 6 0 -0.73 0.52
 1 6 0 -0.34 0.59
 1 -6 0 -1.05 0.54
 1 -6 0 -0.5 0.58
 -1 6 0 0.71 0.51
 -1 -6 0 -0.53 0.55
 1 6 0 -0.6 0.57
 1 6 0 -0.63 0.49
 -1 7 0 -0.1 0.58
 1 7 0 -0.26 0.6
 1 7 0 0.27 0.58
 -1 7 0 -0.13 0.59
 -1 -7 0 -0.4 0.6
 -1 -7 0 0 0.6
 1 -7 0 0.44 0.63
 1 7 0 -0.91 0.52
 -1 7 0 0.43 0.51
 -1 -7 0 0.56 0.56
 -1 -8 0 -0.32 0.62
 -1 -8 0 -0.2 0.57
 -1 -8 0 -0.97 0.63
 -1 8 0 1.09 0.69
 -1 8 0 0.4 0.56
 1 8 0 0.09 0.56
 1 -8 0 1.01 0.64
 1 8 0 0.71 0.6
 -1 8 0 0.45 0.63
 1 8 0 -0.71 0.64
 -1 -9 0 0.53 0.71
 1 -9 0 -0.65 0.67
 -1 -9 0 0.73 0.68
 -1 9 0 1.56 0.65
 -1 9 0 0.77 0.66
 1 9 0 -0.12 0.64
 1 -9 0 -0.17 0.68
 -1 9 0 -0.12 0.59
 1 9 0 0.66 0.7
 -1 -9 0 0.43 0.61
 -1 -10 0 0.13 0.75
 1 -10 0 0.54 0.75
 1 -10 0 0.59 0.75
 1 10 0 -0.86 0.75
 -1 10 0 -0.15 0.7
 1 10 0 0.7 0.73
 -1 10 0 1.13 0.65
 1 10 0 -0.67 0.66
 -1 -10 0 -0.15 0.74
 -1 10 0 -0.48 0.69
 -1 11 0 0.31 0.67
 -1 11 0 0.44 0.85
 1 -11 0 0.57 0.86
 -1 11 0 -0.38 0.79
 1 -11 0 0.69 0.49
 1 11 0 0.93 0.85
 1 11 0 0.05 0.71
 1 -11 0 -0.24 0.8
 -1 -11 0 -1.25 0.82
 1 11 0 0.67 0.86
 -1 -12 0 0.35 0.9
 1 -12 0 -0.77 0.53
 1 12 0 1.59 0.94
 -1 12 0 1.07 0.91
 -1 -12 0 0.03 0.57
 1 12 0 0.31 0.92
 -1 -12 0 -0.74 0.94
 1 -12 0 -0.2 0.92
 -1 12 0 -1.5 0.78
 -1 12 0 -0.65 0.91
 1 13 0 0 1.05
 -1 -13 0 -0.53 1.01
 1 -13 0 -0.71 1.02
 -1 -13 0 -0.19 0.64
 -1 13 0 -1.66 0.97
 1 -13 0 0.36 0.6
 1 -13 0 -0.91 0.99
 -1 -13 0 1.04 1
 1 13 0 -1.53 0.82
 1 -14 0 0.34 1.13
 -1 -14 0 0.64 1.05
 -1 -14 0 -0.52 1.09
 -1 14 0 0.03 0.93
 1 14 0 -0.3 0.97
 1 -14 0 2.38 1.28
 1 -14 0 -0.51 0.62
 -1 14 0 -0.21 1.12
 1 14 0 2.1 1.08
 -1 14 0 0.82 1.09
 -1 -14 0 0 0.7
 1 14 0 -1.91 1.02
 1 -15 0 -0.11 1.14
 1 -15 0 0.79 1.22
 -1 -15 0 -0.88 1.16
 1 15 0 -1.94 1.12
 -1 15 0 0.75 1.19
 -1 -15 0 -0.7 0.73
 -1 -15 0 -0.32 1.21
 -1 15 0 -0.08 1.17
 -1 15 0 -0.13 0.93
 1 16 0 -1.81 1.14
 -1 -16 0 1.5 1.27
 -1 16 0 -0.58 1.05
 -1 16 0 2.03 1.24
 -1 -16 0 1.2 1.28
 1 -16 0 0.29 0.73
 -1 -16 0 0 0.77
 1 -16 0 -1.98 1.17
 1 -16 0 -0.23 1.24
 1 16 0 0.64 1.27
 1 17 0 -0.46 1.39
 -1 17 0 2.6 1.39
 -1 -17 0 -0.14 1.31
 -1 -17 0 -1.52 1.31
 1 17 0 2.78 1.44
 1 -17 0 -1.12 1.32
 -1 17 0 1.2 1.38
 1 -17 0 1.48 1.25
 1 -17 0 0.44 0.74
 2 1 0 457.01 10.84
 -2 -1 0 444.1 10.85
 -2 1 0 432.59 10.82
 2 1 0 448.56 10.83
 -2 -1 0 445.01 10.84
 -2 -1 0 453.59 10.87
 -2 1 0 455.48 10.82
 2 -1 0 447.67 10.82
 -2 1 0 439.81 10.82
 2 -1 0 463.15 10.83
 2 2 0 44.32 1.23
 -2 2 0 41.38 1.19
 -2 -2 0 43.24 1.22
 -2 -2 0 44.22 1.22
 2 -2 0 44.02 1.21
 2 -2 0 43.01 1.2
 2 2 0 42.98 1.24
 -2 -2 0 41.96 1.22
 2 2 0 45.59 1.24
 -2 2 0 42.04 1.19
 -2 3 0 40.74 1.24
 2 3 0 40.53 1.25
 -2 -3 0 39.01 1.25
 -2 -3 0 40.24 1.27
 -2 3 0 40.32 1.23
 2 -3 0 38.02 1.24
 2 3 0 39.78 1.27
 2 -3 0 39.94 1.24
 2 3 0 41.02 1.27
 -2 -4 0 11.98 0.78
 2 4 0 12.49 0.79
 -2 4 0 10.74 0.8
 2 4 0 11.13 0.82
 -2 -4 0 11.31 0.83
 2 -4 0 11.03 0.81
 2 4 0 11.63 0.82
 -2 4 0 12.51 0.76
 2 -4 0 11.1 0.77
 -2 4 0 10.72 0.79
 2 5 0 19.07 0.94
 2 5 0 19.94 0.99
 -2 5 0 18.93 0.95
 2 -5 0 18.97 0.97
 2 5 0 18.94 0.98
 2 -5 0 19.18 0.98
 -2 5 0 17.54 0.94
 -2 -5 0 18.4 0.99
 -2 5 0 18.13 0.91
 -2 -5 0 19.3 0.95
 2 -6 0 344.68 8.44
 2 6 0 352.79 8.45
 2 6 0 341.21 8.45
 2 6 0 348.5 8.45
 -2 6 0 350.92 8.44
 -2 6 0 332.66 8.43
 -2 -6 0 341.98 8.45
 -2 -6 0 346.6 8.45
 -2 6 0 340.3 8.43
 2 -6 0 342.99 8.44
 -2 -6 0 334.18 8.44
 -2 7 0 85.78 2.43
 -2 -7 0 87.53 2.47
 -2 -7 0 84.86 2.43
 2 -7 0 84.99 2.45
 -2 7 0 89.87 2.46
 2 7 0 82.39 2.45
 2 7 0 86.8 2.44
 -2 7 0 86.21 2.42
 -2 -7 0 88.33 2.47
 2 7 0 90.48 2.48
 -2 -8 0 26.68 1.31
 2 8 0 24.46 1.22
 2 8 0 25.99 1.3
 -2 8 0 24.43 1.2
 -2 -8 0 25.68 1.26
 2 8 0 25.76 1.29
 -2 8 0 26.82 1.31
 -2 8 0 27.01 1.25
 -2 -8 0 28.31 1.35
 -2 9 0 2.61 0.63
 -2 -9 0 2.65 0.67
 -2 9 0 2.3 0.75
 -2 9 0 2.82 0.7
 -2 -9 0 2.14 0.73
 -2 -9 0 1.55 0.74
 2 9 0 2.17 0.72
 2 9 0 2.51 0.65
 2 -9 0 3.44 0.7
 2 -9 0 3.34 0.72
 -2 10 0 30.42 1.55
 -2 -10 0 33.84 1.58
 -2 10 0 30.42 1.49
 2 10 0 33.14 1.55
 2 -10 0 30.55 1.52
 2 10 0 28 1.45
 2 10 0 31.77 1.55
 -2 10 0 29.04 1.45
 2 -10 0 31.43 1.53
 -2 -10 0 30.78 1.48
 -2 -11 0 13.39 1.22
 2 11 0 14.45 1.09
 2 11 0 12.08 1.04
 -2 11 0 12.67 1.03
 -2 -11 0 14.24 1.06
 2 -11 0 13.6 1.05
 2 -11 0 11.89 0.97
 2 -11 0 11.66 1.02
 -2 11 0 14.44 1.07
 2 11 0 11.97 0.96
 -2 -11 0 12.25 1.04
 -2 11 0 12.34 0.93
 2 -12 0 0.97 0.53
 -2 12 0 0.94 0.79
 -2 -12 0 3.59 0.98
 2 -12 0 3.68 1.01
 -2 12 0 2.61 0.89
 2 -12 0 2.07 0.93
 -2 -12 0 1.71 0.64
 -2 12 0 2.4 0.92
 2 12 0 1.94 0.94
 -2 -12 0 2.47 0.97
 2 12 0 1.52 0.9
 -2 13 0 18.26 1.3
 -2 -13 0 20.95 1.4
 -2 -13 0 21.7 1.47
 2 -13 0 21.29 1.79
 -2 13 0 20.92 1.82
 2 13 0 17.9 1.29
 -2 -13 0 20.03 1.43
 2 -13 0 20.88 1.37
 2 -13 0 17.69 1.23
 2 -14 0 1.12 1.19
 -2 14 0 1.81 0.95
 -2 14 0 1.48 1.08
 2 14 0 3.99 1.07
 -2 -14 0 2.07 1.1
 2 14 0 1.71 1.07
 2 -14 0 2.96 1.11
 -2 -14 0 0.63 0.74
 -2 -14 0 2.06 1.07
 -2 14 0 3.6 1.14
 2 -15 0 1.54 1.16
 -2 15 0 0.97 1
 -2 -15 0 1.23 1.24
 2 -15 0 1.97 0.64
 2 15 0 4.35 1.18
 2 15 0 2.2 1.24
 -2 -15 0 0.27 1.2
 2 15 0 2.01 1.14
 -2 15 0 2.01 1.18
 -2 -15 0 2.81 0.79
 -2 15 0 3.3 1.18
 2 -15 0 3.5 1.26
 -2 -16 0 2.86 1.37
 2 16 0 1.29 1.34
 2 16 0 4.71 1.36
 -2 16 0 3.19 1.31
 -2 16 0 1.82 1.06
 -2 -16 0 2.01 1.01
 2 16 0 3.29 1.28
 2 -16 0 2.1 1.34
 -2 16 0 2.96 1.3
 -2 -16 0 1.98 1.31
 2 -16 0 0.47 1.26
 2 -17 0 4.24 1.44
 -2 17 0 1.84 1.38
 -2 -17 0 4.65 1.45
 2 17 0 3.54 1.39
 -2 -17 0 3.07 0.93
 2 17 0 1.69 1.38
 2 -17 0 1.84 0.73
 3 0 0 -0.02 0.21
 -3 0 0 -0.19 0.24
 -3 0 0 0.02 0.19
 3 0 0 0.05 0.27
 -3 -1 0 -0.2 0.32
 3 -1 0 -0.25 0.23
 -3 1 0 -0.26 0.21
 3 1 0 -0.5 0.27
 3 1 0 -0.21 0.28
 -3 -1 0 -0.51 0.27
 3 -1 0 -0.41 0.24
 -3 -1 0 -0.55 0.25
 -3 1 0 -0.28 0.21
 -3 -1 0 0.27 0.27
 -3 2 0 0.28 0.19
 3 -2 0 -0.24 0.36
 -3 2 0 -0.27 0.35
 3 -2 0 -0.02 0.37
 3 -2 0 0.21 0.21
 -3 -2 0 -0.14 0.41
 -3 -2 0 -0.53 0.39
 3 2 0 -0.57 0.36
 -3 -2 0 0.35 0.37
 3 2 0 0.41 0.41
 3 2 0 -0.03 0.41
 3 3 0 0.39 0.42
 3 -3 0 -0.12 0.39
 3 3 0 -0.01 0.42
 -3 3 0 0.04 0.4
 -3 -3 0 -0.13 0.44
 3 3 0 -0.3 0.38
 3 -3 0 -0.57 0.41
 -3 -3 0 0.04 0.42
 -3 3 0 -0.01 0.41
 -3 -3 0 0.1 0.4
 -3 -4 0 0.63 0.48
 -3 4 0 -0.1 0.41
 -3 -4 0 -0.36 0.43
 3 4 0 0.08 0.44
 3 -4 0 0.14 0.42
 -3 -4 0 -0.3 0.48
 3 4 0 -0.25 0.4
 3 -4 0 -0.43 0.46
 3 4 0 0.45 0.45
 -3 4 0 -0.5 0.41
 -3 -5 0 -0.05 0.46
 3 -5 0 -0.59 0.47
 -3 -5 0 0.77 0.5
 -3 -5 0 -0.55 0.52
 3 5 0 0.01 0.47
 3 5 0 -0.42 0.56
 3 5 0 -0.54 0.54
 -3 5 0 -0.42 0.47
 -3 5 0 0.47 0.44
 -3 5 0 -0.62 0.48
 3 -5 0 -0.45 0.51
 3 6 0 0.47 0.52
 -3 6 0 0.47 0.52
 3 6 0 -0.33 0.57
 3 6 0 -0.94 0.56
 -3 -6 0 -0.24 0.52
 3 -6 0 -1.03 0.54
 -3 6 0 -0.13 0.58
 3 -6 0 -0.75 0.5
 -3 6 0 -0.12 0.47
 -3 -6 0 -1.19 0.57
 3 7 0 0.2 0.51
 -3 -7 0 -0.21 0.63
 -3 7 0 0.3 0.62
 3 7 0 0.23 0.56
 -3 -7 0 0.34 0.55
 3 7 0 0.68 0.61
 -3 -7 0 0.35 0.59
 3 -7 0 0.37 0.58
 -3 7 0 0.71 0.57
 -3 7 0 0.16 0.52
 -3 8 0 -0.98 0.57
 -3 8 0 -1.3 0.61
 -3 -8 0 -0.54 0.64
 -3 -8 0 0.34 0.54
 3 8 0 -0.72 0.68
 -3 -8 0 -0.02 0.63
 3 8 0 -0.46 0.57
 3 8 0 -0.1 0.66
 3 -8 0 -0.35 0.65
 -3 8 0 -0.07 0.55
 3 -9 0 -0.81 0.66
 -3 9 0 -0.61 0.58
 -3 -9 0 -0.88 0.69
 3 9 0 1.09 0.73
 3 -9 0 1.38 0.73
 -3 9 0 0.39 0.66
 3 9 0 -0.01 0.61
 -3 -9 0 0.16 0.61
 -3 9 0 0.24 0.65
 3 9 0 -0.07 0.67
 -3 -9 0 1.14 0.72
 -3 -9 0 -0.4 0.5
 3 -10 0 0.62 0.77
 -3 -10 0 -1.12 0.75
 3 10 0 -0.59 0.65
 3 10 0 0.13 0.71
 -3 10 0 0.71 0.75
 3 10 0 0.02 0.76
 -3 -10 0 0.29 0.54
 -3 -10 0 0.33 0.8
 -3 10 0 0.24 0.77
 3 -10 0 -0.9 0.76
 -3 10 0 -0.08 0.66
 3 -11 0 0.81 0.82
 3 11 0 -0.55 0.86
 -3 -11 0 -0.61 0.83
 -3 -11 0 0.1 0.59
 -3 -11 0 -0.96 0.82
 3 11 0 0.14 0.84
 3 -11 0 0.17 0.45
 -3 -11 0 -0.08 0.77
 -3 11 0 -0.61 0.73
 -3 11 0 0.52 0.81
 -3 11 0 -0.09 0.83
 3 12 0 2.27 1.55
 -3 -12 0 0.27 0.93
 -3 -12 0 0.77 0.65
 -3 12 0 0.65 0.96
 3 -12 0 0.06 0.48
 3 -12 0 0.64 0.97
 -3 12 0 -0.71 1.61
 -3 12 0 0.16 0.77
 3 -12 0 0.56 0.87
 3 12 0 0.35 0.93
 -3 -13 0 -0.25 0.71
 3 13 0 -0.38 0.99
 -3 13 0 0.66 0.85
 -3 -13 0 1.05 1.03
 -3 -13 0 0.64 0.95
 3 -13 0 0 1.03
 -3 13 0 -1.62 0.93
 3 13 0 -0.66 1
 3 -13 0 -0.54 0.95
 3 13 0 -0.39 0.89
 3 -13 0 0.08 0.52
 3 14 0 1.16 1.02
 -3 14 0 -1.03 0.95
 -3 -14 0 -1.16 1.05
 -3 14 0 1.32 1.12
 3 14 0 0.65 1.06
 3 -14 0 0.29 0.99
 3 14 0 0.83 1.07
 -3 14 0 0.64 1.79
 3 -14 0 0.25 0.52
 3 -14 0 -0.28 1
 -3 -14 0 -0.35 0.74
 -3 -14 0 0.04 1.01
 3 15 0 1.99 1.24
 -3 15 0 -1.02 1.14
 -3 -15 0 -0.03 1.28
 3 -15 0 3.19 1.2
 -3 -15 0 0.76 1.1
 -3 15 0 -0.89 1.04
 -3 15 0 1.67 1.18
 -3 -15 0 1.58 1.19
 3 -15 0 1.07 1.16
 3 -16 0 2.29 1.26
 3 -16 0 -0.26 1.13
 3 16 0 1.44 1.3
 -3 -16 0 1.87 0.87
 3 16 0 -1.88 1.29
 -3 16 0 0.57 1.2
 -3 16 0 0.8 1.21
 3 -16 0 0.7 0.62
 -3 16 0 1.43 1.07
 3 -17 0 2.28 1.36
 3 17 0 0.67 1.38
 3 17 0 4.57 1.41
 -3 -17 0 1.18 0.97
 -3 -17 0 2.72 1.46
 -3 -17 0 2.81 1.34
 -4 0 0 487.03 12.05
 -4 0 0 508.02 12.09
 4 0 0 503.93 12.09
 -4 1 0 119.45 3.02
 4 -1 0 118.5 3.03
 4 1 0 123.91 2.99
 -4 -1 0 117.45 2.99
 -4 -1 0 121.32 3.09
 -4 -1 0 120.79 3.02
 4 1 0 123.06 3.02
 -4 -1 0 126.98 2.99
 4 -2 0 18.52 0.66
 4 2 0 18.66 0.75
 -4 2 0 19.18 0.7
 -4 -2 0 18.46 0.93
 -4 2 0 19.44 0.71
 -4 -2 0 19.72 0.77
 4 2 0 20.63 0.79
 -4 2 0 20.39 0.66
 -4 -2 0 20.46 0.8
 4 2 0 17.62 0.76
 -4 -2 0 18.78 0.79
 4 -2 0 19.14 0.69
 -4 3 0 28.15 0.94
 -4 -3 0 29.32 1.01
 -4 -3 0 28.16 1.02
 -4 3 0 27.14 0.94
 4 3 0 27.23 0.99
 4 3 0 27.08 1.01
 -4 -3 0 26.24 1.07
 4 3 0 28.5 1
 -4 -3 0 28.72 1.01
 4 -3 0 28.09 0.93
 -4 -4 0 36.49 1.24
 4 -4 0 36.36 1.2
 -4 4 0 36.96 1.18
 4 4 0 37.98 1.26
 -4 -4 0 38.02 1.25
 4 -4 0 39.26 1.2
 4 4 0 36.82 1.23
 -4 -4 0 39.9 1.26
 -4 4 0 37.3 1.21
 4 -5 0 164.87 4.17
 4 5 0 163.98 4.2
 -4 5 0 165.16 4.17
 4 5 0 169.24 4.2
 -4 -5 0 166.25 4.19
 -4 5 0 164.48 4.16
 -4 -5 0 165.93 4.2
 4 -5 0 163.13 4.17
 4 5 0 165.65 4.19
 -4 -5 0 167.67 4.2
 4 -6 0 34.21 1.28
 -4 6 0 35.88 1.29
 4 6 0 35.75 1.31
 -4 -6 0 35.42 1.35
 4 6 0 33.63 1.32
 4 6 0 34.75 1.35
 -4 6 0 34.19 1.3
 -4 -6 0 32.49 1.33
 -4 -6 0 35.59 1.32
 -4 6 0 36.52 1.26
 4 -6 0 33.99 1.29
 4 7 0 111.2 3
 -4 7 0 109.99 2.97
 -4 -7 0 111.45 3
 -4 -7 0 114.71 3.01
 4 -7 0 110.46 2.97
 4 7 0 109.81 3
 -4 -7 0 110.52 3
 -4 7 0 108.89 2.97
 4 7 0 109.55 3
 -4 7 0 111.09 2.95
 -4 -8 0 6.18 0.67
 -4 -8 0 4.28 0.57
 -4 8 0 4.93 0.69
 4 8 0 4.36 0.63
 4 8 0 5.75 0.66
 4 8 0 6.68 0.72
 -4 -8 0 6.28 0.72
 -4 8 0 6.16 0.69
 -4 -8 0 5.63 0.71
 -4 8 0 5.03 0.61
 4 -8 0 5.06 0.66
 4 -9 0 26.99 1.39
 -4 9 0 27.01 1.38
 -4 -9 0 30.54 1.48
 -4 -9 0 28.39 1.38
 4 9 0 28.87 1.43
 -4 9 0 26.31 1.38
 4 9 0 27.68 1.43
 -4 -9 0 29.05 1.39
 -4 9 0 28.46 1.29
 -4 -9 0 29.9 1.43
 4 -9 0 28.36 1.38
 -4 10 0 13.02 0.91
 -4 10 0 12.24 0.92
 -4 -10 0 12.43 0.93
 4 -10 0 12.6 0.96
 -4 -10 0 11.45 0.81
 -4 -10 0 13.76 0.98
 4 10 0 12.21 0.98
 4 10 0 11.11 0.88
 4 10 0 12.35 0.98
 -4 10 0 12.37 0.94
 4 -10 0 13.22 1
 -4 -10 0 13.31 0.99
 4 11 0 146.75 4.02
 -4 11 0 140.6 3.97
 4 -11 0 144.89 3.98
 4 -11 0 138.47 3.68
 -4 -11 0 149.15 4.04
 -4 11 0 148.95 3.96
 -4 -11 0 143.97 4.01
 4 -11 0 151.47 4.02
 4 11 0 143.36 4
 -4 -11 0 138.31 3.99
 4 11 0 145.96 4.03
 -4 -11 0 144.19 3.94
 -4 11 0 144.13 3.99
 -4 -12 0 20.43 1.51
 4 -12 0 20.63 1.6
 -4 12 0 21.97 1.71
 4 12 0 19.9 1.64
 -4 -12 0 20.81 1.67
 4 12 0 18.69 1.67
 -4 -12 0 18.78 1.61
 -4 -12 0 18.43 1.45
 4 12 0 20.68 1.56
 -4 12 0 16.59 1.51
 4 -12 0 20.35 1.65
 -4 12 0 18.75 1.65
 4 -12 0 19.6 1
 -4 -13 0 5.34 1.1
 4 -13 0 3.83 0.98
 4 -13 0 3.61 1.05
 -4 13 0 4.1 1.05
 -4 -13 0 4.15 1.11
 4 13 0 4.4 1.02
 4 13 0 3.65 1.03
 -4 -13 0 3.8 0.8
 -4 13 0 4.59 0.96
 4 -13 0 3.24 0.51
 -4 13 0 5.35 1.05
 4 13 0 4.76 1.11
 -4 -14 0 0.6 0.79
 4 14 0 -0.48 1.02
 -4 14 0 -0.37 1.07
 4 14 0 -0.18 1.06
 -4 -14 0 0.76 1.05
 -4 14 0 0.35 0.9
 4 -14 0 0.7 1.12
 4 14 0 -0.1 1.02
 4 -14 0 -0.56 0.47
 -4 -14 0 -1.77 0.98
 -4 14 0 1.81 1.13
 4 15 0 13.29 1.46
 4 15 0 11.29 1.3
 -4 -15 0 11.42 1.33
 4 15 0 12.22 1.27
 4 -15 0 12.3 1.06
 4 -15 0 12.74 1.36
 -4 -15 0 12.67 1.39
 -4 15 0 12.93 1.3
 -4 15 0 11.69 1.38
 -4 -16 0 0.9 0.93
 4 -16 0 2.11 1.19
 -4 -16 0 4.41 1.45
 4 -16 0 2.75 0.63
 -4 16 0 2.17 1.21
 -4 -16 0 4.25 1.45
 -4 16 0 2.42 1.27
 -4 16 0 2.39 1.15
 4 -16 0 3.09 1.15
 4 16 0 3.22 1.39
 -4 17 0 3.01 1.41
 -4 17 0 5.24 1.46
 -4 -17 0 3.92 1.04
 -4 -17 0 2.17 1.44
 4 17 0 4.04 1.47
 4 -17 0 5.04 1.46
 4 17 0 7.08 1.56
 4 17 0 5.08 1.35
 -5 0 0 -0.18 0.27
 -5 0 0 -0.35 0.32
 5 1 0 -0.01 0.27
 -5 -1 0 -0.19 0.36
 -5 1 0 0.01 0.29
 -5 -1 0 0.1 0.29
 -5 -1 0 -0.29 0.29
 -5 -1 0 -0.16 0.29
 5 1 0 -0.36 0.3
 5 -1 0 0.13 0.32
 5 2 0 -0.26 0.34
 5 2 0 0.26 0.35
 5 2 0 0.33 0.37
 -5 -2 0 0.33 0.36
 5 -2 0 -0.06 0.28
 -5 -2 0 0.21 0.38
 -5 -2 0 0.07 0.35
 -5 2 0 -0.24 0.36
 -5 -2 0 0.09 0.35
 5 -2 0 -0.04 0.29
 -5 2 0 -0.53 0.28
 -5 2 0 -0.23 0.25
 -5 -3 0 -0.15 0.42
 -5 -3 0 -0.27 0.42
 5 3 0 -0.16 0.4
 -5 3 0 -0.32 0.36
 -5 -3 0 0.15 0.39
 5 -3 0 -0.19 0.34
 5 -3 0 0.14 0.36
 5 -3 0 0.09 0.23
 -5 -3 0 -0.31 0.4
 -5 3 0 -0.12 0.35
 5 3 0 -0.09 0.38
 5 3 0 -0.25 0.43
 -5 -4 0 0.05 0.45
 -5 -4 0 -0.27 0.45
 5 -4 0 -0.24 0.43
 5 4 0 0.01 0.43
 5 4 0 0.16 0.45
 -5 -4 0 -0.59 0.44
 -5 -4 0 -0.48 0.43
 -5 4 0 0.07 0.43
 5 4 0 -0.68 0.48
 5 -4 0 0.34 0.42
 -5 4 0 0.35 0.41
 5 5 0 -0.1 0.48
 5 -5 0 0.1 0.48
 -5 -5 0 0.52 0.5
 -5 -5 0 0.05 0.5
 -5 -5 0 -0.4 0.47
 -5 5 0 -0.3 0.46
 5 -5 0 0.14 0.47
 -5 -5 0 -0.1 0.5
 5 5 0 0.11 0.51
 5 5 0 -0.44 0.52
 -5 5 0 0.19 0.48
 -5 -6 0 -0.19 0.54
 5 -6 0 -0.39 0.52
 -5 -6 0 0.04 0.59
 -5 6 0 0.58 0.53
 -5 -6 0 0.37 0.52
 5 6 0 0.27 0.5
 -5 6 0 0.24 0.51
 5 -6 0 -0.39 0.52
 -5 6 0 -0.62 0.46
 5 6 0 0.83 0.55
 -5 -6 0 -0.14 0.47
 5 6 0 0.07 0.56
 -5 7 0 1.24 0.61
 5 7 0 -0.29 0.59
 -5 7 0 -0.39 0.54
 -5 -7 0 -0.04 0.56
 5 7 0 -0.31 0.64
 -5 -7 0 -0.53 0.5
 -5 -7 0 0.03 0.57
 5 -7 0 -0.78 0.54
 -5 -7 0 -0.36 0.61
 5 7 0 0.36 0.53
 5 8 0 0.74 0.59
 5 8 0 0.56 0.64
 -5 8 0 0.82 0.59
 -5 -8 0 0.96 0.65
 -5 8 0 -0.24 0.58
 -5 -8 0 0.91 0.6
 -5 8 0 1.52 0.55
 5 8 0 -0.05 0.59
 -5 -8 0 0.83 0.65
 5 9 0 0.23 0.71
 5 9 0 -1.31 0.74
 5 -9 0 -0.15 0.69
 -5 9 0 -0.01 0.58
 -5 -9 0 -0.56 0.69
 5 9 0 0.15 0.67
 -5 -9 0 0.64 0.73
 5 -9 0 -0.01 0.64
 -5 9 0 -0.47 0.66
 -5 -9 0 0.67 0.66
 5 -10 0 0.33 0.75
 5 10 0 -0.79 0.73
 -5 -10 0 0.8 0.61
 -5 -10 0 -1.37 0.77
 5 -10 0 -0.06 0.83
 -5 10 0 0.73 0.67
 -5 10 0 -0.4 0.75
 -5 -10 0 -0.14 0.75
 -5 -10 0 0.27 0.69
 5 10 0 -0.49 0.79
 5 10 0 0.85 0.75
 -5 10 0 -1.15 0.75
 5 11 0 1.21 0.86
 -5 11 0 1.22 0.89
 5 -11 0 2.81 0.84
 5 11 0 1.75 0.88
 -5 -11 0 0.2 0.8
 -5 -11 0 2.01 0.88
 -5 11 0 1.25 0.84
 -5 11 0 1.06 0.75
 5 -11 0 0.39 1
 -5 -11 0 3.06 0.9
 -5 -11 0 0.45 0.68
 5 11 0 1.54 0.83
 5 -12 0 -0.27 0.87
 5 12 0 0.93 0.9
 -5 12 0 -0.94 0.8
 -5 -12 0 0.23 0.88
 5 12 0 0.91 0.91
 5 -12 0 1.65 0.87
 5 12 0 -1.12 1
 -5 12 0 2.38 0.96
 -5 -12 0 -0.35 0.93
 -5 -12 0 -1.11 0.9
 -5 12 0 0.97 0.92
 5 -13 0 -0.74 1.05
 -5 -13 0 -0.8 1.78
 5 13 0 1.19 0.95
 -5 13 0 -0.79 1
 5 13 0 0.38 0.88
 5 13 0 0.34 1.06
 5 -13 0 -0.48 0.98
 -5 -13 0 1.18 0.98
 -5 -13 0 -0.05 0.78
 -5 13 0 0.79 0.86
 -5 13 0 2.19 1.01
 -5 -13 0 -0.13 0.91
 5 14 0 -0.85 1.11
 -5 14 0 0.92 1.17
 -5 -14 0 -0.07 0.82
 -5 -14 0 1.61 1.09
 -5 14 0 0.82 1.05
 5 -14 0 1.88 1.06
 5 14 0 1.54 1.05
 -5 -14 0 3.67 1.17
 5 14 0 -0.5 1.15
 5 -14 0 -1.01 1.11
 -5 -15 0 1.37 0.84
 -5 15 0 0.21 1.09
 5 15 0 -0.53 1.02
 5 15 0 1.11 1.24
 -5 -15 0 2.29 1.34
 -5 15 0 2.19 1.2
 5 -15 0 0.62 1.83
 5 15 0 -0.64 1.13
 -5 15 0 0.71 1.06
 5 -15 0 1.37 1.13
 -5 -15 0 0.26 1.18
 5 16 0 -0.29 1.08
 -5 16 0 0.68 1.13
 -5 16 0 1.05 1.36
 5 16 0 -0.04 1.36
 -5 -16 0 0.19 1.31
 -5 16 0 0.71 1.25
 -6 0 0 34.67 1.02
 -6 0 0 36.1 1.12
 6 1 0 1.84 0.33
 -6 -1 0 1.5 0.39
 -6 -1 0 2.43 0.29
 -6 -1 0 2.42 0.32
 -6 1 0 1.71 0.32
 6 -1 0 1.91 0.36
 6 -2 0 95.6 2.43
 -6 -2 0 96.83 2.45
 -6 -2 0 97.38 2.41
 6 2 0 92.49 2.48
 -6 -2 0 97.05 2.55
 6 -2 0 94.82 2.36
 -6 2 0 95.74 2.41
 -6 2 0 90.67 2.35
 6 2 0 96.1 2.41
 -6 -2 0 94.97 2.41
 6 2 0 94.39 2.45
 -6 3 0 63.29 1.68
 -6 -3 0 63.68 1.76
 -6 3 0 65.48 1.71
 -6 -3 0 65.84 1.81
 6 3 0 67.45 1.78
 6 3 0 65.09 1.8
 6 -3 0 65.56 1.7
 -6 -3 0 63.34 1.77
 6 3 0 63.25 1.76
 -6 -3 0 66.41 1.91
 6 -3 0 65.89 1.71
 -6 3 0 63.47 1.7
 6 4 0 46.46 1.42
 -6 -4 0 44.37 1.39
 -6 -4 0 43.67 1.52
 -6 4 0 42.38 1.3
 6 4 0 46.04 1.39
 -6 4 0 45.6 1.33
 6 -4 0 43.48 1.31
 6 4 0 42.57 1.41
 -6 -4 0 45.13 1.43
 -6 -5 0 39.5 1.35
 -6 5 0 37.2 1.27
 6 -5 0 37.35 1.25
 -6 -5 0 37.05 1.34
 -6 -5 0 39.06 1.33
 6 5 0 39.8 1.33
 6 -5 0 36.96 1.27
 -6 5 0 35.87 1.26
 6 5 0 37.24 1.36
 6 5 0 38.77 1.33
 -6 -5 0 37.58 1.46
 6 6 0 24.42 1.14
 6 -6 0 24.72 1.07
 -6 -6 0 25.57 1.24
 -6 -6 0 25.76 1.17
 6 6 0 25.26 1.16
 -6 -6 0 23.07 1.16
 6 6 0 24.42 1.15
 -6 6 0 24.53 1.06
 -6 -6 0 22.29 1.15
 -6 6 0 22.82 1.09
 6 -6 0 22.82 1.06
 -6 7 0 3.91 0.62
 -6 -7 0 4.08 0.64
 -6 7 0 4.69 0.64
 -6 -7 0 3.28 0.66
 6 7 0 5.01 0.62
 -6 7 0 4.99 0.56
 6 7 0 3.65 0.62
 -6 -7 0 4.38 0.64
 6 -7 0 3.3 0.63
 6 7 0 3.19 0.61
 -6 -8 0 38.09 1.5
 -6 8 0 37.09 1.45
 -6 8 0 33.91 1.44
 6 8 0 36.39 1.47
 6 8 0 35.38 1.47
 6 -8 0 36.11 1.42
 -6 -8 0 32.84 1.54
 6 8 0 35.25 1.48
 -6 -8 0 35.03 1.48
 -6 -8 0 33.92 1.49
 -6 -9 0 0.23 0.6
 6 9 0 2.4 0.73
 6 9 0 1.15 0.75
 6 9 0 1.09 0.68
 -6 9 0 1.05 0.68
 6 -9 0 1.69 0.73
 -6 -9 0 1.07 0.77
 -6 9 0 0.64 0.61
 -6 -10 0 19.79 1.48
 -6 -10 0 18.72 1.38
 -6 -10 0 17.57 1.39
 6 -10 0 18.07 1.38
 6 -10 0 20.24 1.39
 6 10 0 18.79 1.42
 -6 10 0 18.03 1.39
 -6 -10 0 17.45 1.46
 -6 10 0 17.94 1.32
 -6 10 0 20.76 1.41
 6 10 0 18.68 1.46
 6 10 0 17.01 1.4
 6 -11 0 81.42 2.56
 -6 -11 0 79.65 2.62
 -6 11 0 78.36 2.57
 -6 -11 0 79.9 2.63
 -6 -11 0 79.31 2.63
 -6 11 0 80.4 2.51
 6 11 0 79.57 2.61
 -6 -11 0 78.33 2.59
 6 11 0 76.47 2.59
 6 12 0 22.4 1.66
 -6 12 0 21.35 1.68
 -6 -12 0 21.47 1.68
 -6 12 0 21.52 1.54
 6 -12 0 18.36 1.6
 6 -12 0 19.3 1.31
 6 12 0 21.08 1.61
 -6 -12 0 21.01 1.69
 -6 -12 0 19.92 1.71
 -6 -12 0 21.74 1.73
 6 12 0 21.73 1.76
 -6 12 0 21.82 1.34
 6 13 0 50.44 2.32
 6 13 0 52.24 2.26
 -6 -13 0 54.86 3.14
 6 -13 0 52.29 2.19
 -6 13 0 52.39 2.18
 -6 13 0 53.3 2.26
 -6 13 0 50.97 2.14
 6 -13 0 51.84 2.21
 6 13 0 50.21 2.31
 -6 -13 0 53.86 2.28
 -6 -13 0 50.13 2.22
 -6 -13 0 50.8 2.19
 6 14 0 1.91 1.06
 -6 14 0 1.26 1.14
 -6 14 0 4.38 1.14
 6 14 0 2.39 1.02
 -6 14 0 2.53 1.01
 6 -14 0 3.73 1.13
 -6 -14 0 3.35 1.13
 -6 -14 0 2.25 0.86
 6 -14 0 3.05 1.07
 6 14 0 4.17 1.17
 -6 -14 0 2.44 1.17
 6 15 0 9.06 1.39
 -6 -15 0 11.02 1.38
 6 15 0 8.75 1.29
 6 15 0 6.86 1.31
 -6 15 0 6.77 1.15
 -6 15 0 10.67 1.39
 -6 15 0 8.17 1.25
 -6 -15 0 9.89 1.37
 6 -15 0 8.3 1.39
 -6 -16 0 2.11 1.32
 -6 16 0 0.69 1.14
 -6 -16 0 2.41 0.99
 6 16 0 0.54 1.21
 -6 -16 0 3.41 1.37
 6 -16 0 0.38 1.26
 6 16 0 4.68 1.17
 6 -16 0 0.36 1.14
 -6 16 0 4.71 1.22
 6 16 0 2.69 1.49
 -7 0 0 -0.23 0.34
 -7 0 0 -0.18 0.28
 -7 -1 0 -0.4 0.28
 7 1 0 0.03 0.26
 -7 -1 0 -0.04 0.4
 -7 -1 0 0.69 0.29
 -7 1 0 0.28 0.28
 7 1 0 -0.41 0.33
 -7 -1 0 0.24 0.32
 -7 1 0 -0.32 0.33
 -7 -2 0 -0.34 0.42
 -7 -2 0 0.33 0.37
 7 2 0 0.17 0.34
 7 2 0 0.34 0.38
 -7 -2 0 -0.33 0.35
 -7 -2 0 0.44 0.37
 7 -2 0 0.31 0.35
 -7 -3 0 -0.7 0.42
 -7 -3 0 0.1 0.44
 -7 3 0 -0.53 0.29
 -7 -3 0 0.1 0.43
 7 3 0 0.24 0.41
 -7 3 0 -0.09 0.34
 7 -3 0 0.15 0.32
 -7 -3 0 -0.03 0.4
 7 -3 0 0.48 0.36
 -7 3 0 -0.15 0.35
 7 3 0 -0.26 0.44
 7 3 0 -0.15 0.41
 7 4 0 -0.56 0.44
 -7 -4 0 -0.22 0.46
 -7 4 0 -0.36 0.39
 -7 -4 0 -0.66 0.47
 7 -4 0 0.63 0.38
 7 -4 0 0.02 0.43
 7 4 0 -0.01 0.45
 -7 4 0 -0.11 0.41
 -7 -4 0 0.32 0.47
 -7 -4 0 0.14 0.47
 7 4 0 -0.68 0.48
 7 -4 0 -0.15 0.28
 -7 5 0 -0.15 0.46
 -7 -5 0 0.71 0.56
 7 5 0 0.17 0.51
 7 -5 0 0.05 0.47
 -7 -5 0 -0.73 0.49
 7 5 0 -0.18 0.49
 7 5 0 -0.68 0.52
 7 -5 0 -0.5 0.44
 -7 -5 0 -0.18 0.55
 -7 5 0 -0.05 0.47
 -7 -5 0 -0.27 0.49
 -7 -6 0 0.67 0.56
 7 6 0 0.62 0.54
 7 -6 0 0.28 0.51
 -7 6 0 0.44 0.5
 7 6 0 0.67 0.55
 -7 -6 0 -0.05 0.5
 -7 6 0 -0.07 0.53
 7 6 0 0.55 0.56
 7 7 0 -0.02 0.6
 -7 7 0 -0.76 0.49
 7 7 0 -0.98 0.56
 -7 7 0 0.66 0.56
 -7 -7 0 -0.74 0.57
 7 7 0 -1.11 0.56
 -7 7 0 -0.86 0.55
 -7 -7 0 0.03 0.58
 -7 -7 0 0.46 0.56
 7 -7 0 -0.24 0.55
 -7 -8 0 -1.13 0.66
 -7 8 0 0.21 0.64
 7 8 0 -0.5 0.72
 7 -8 0 0.39 0.63
 7 8 0 -0.01 0.6
 -7 -8 0 -0.97 0.6
 -7 -8 0 -0.69 0.64
 7 -8 0 0.45 0.64
 7 8 0 -0.4 0.59
 -7 -8 0 -0.33 0.63
 -7 8 0 0.78 0.55
 -7 8 0 0 0.63
 7 9 0 -0.24 0.7
 -7 9 0 0.63 0.69
 7 -9 0 -0.21 0.67
 -7 -9 0 -1.01 0.74
 -7 -9 0 0.64 0.71
 7 9 0 1.11 0.8
 -7 9 0 -0.32 0.71
 -7 -9 0 0.24 0.62
 -7 -9 0 -0.36 0.72
 7 9 0 0.17 0.69
 -7 9 0 0.02 0.63
 7 -9 0 -1.06 0.65
 -7 -10 0 0.42 0.85
 -7 10 0 1.11 0.77
 -7 -10 0 2 0.78
 -7 10 0 1.04 0.69
 7 10 0 2.04 0.78
 -7 -10 0 -0.03 0.83
 7 10 0 -0.29 0.73
 -7 10 0 1.17 0.75
 -7 11 0 -0.05 0.76
 -7 -11 0 -1.16 1.03
 -7 -11 0 -0.32 0.73
 7 11 0 0.44 0.82
 7 11 0 1.22 0.96
 -7 11 0 -0.41 0.86
 -7 -11 0 0.15 1.09
 7 -11 0 0.46 0.86
 7 -11 0 0.04 0.83
 7 11 0 1.41 0.9
 -7 -11 0 0.16 0.91
 -7 11 0 0.27 1.39
 7 12 0 1.09 0.9
 7 12 0 1.69 0.84
 -7 12 0 0.35 0.94
 7 12 0 -0.99 0.99
 -7 -12 0 1.5 0.96
 -7 12 0 1.32 0.9
 -7 -12 0 0.25 0.93
 -7 -12 0 0.04 0.9
 -7 -12 0 1.09 0.93
 -7 -13 0 -1 0.76
 7 -13 0 -0.17 0.99
 7 13 0 0.61 1.09
 -7 -13 0 0.15 1.11
 -7 13 0 -1.61 1
 -7 -13 0 0.26 0.98
 7 13 0 1.25 0.89
 -7 13 0 -0.79 0.88
 7 -13 0 0.98 0.92
 -7 13 0 0.13 0.92
 -7 -13 0 1.72 1.09
 7 -14 0 1.91 1.1
 7 14 0 -0.96 0.92
 -7 14 0 -1.56 1
 -7 -14 0 -0.99 0.98
 -7 -14 0 1.74 1.08
 7 14 0 2.26 1.25
 -7 14 0 0.14 1.11
 -7 14 0 1.1 0.94
 7 -14 0 -0.86 1.04
 -7 -14 0 -1.14 0.82
 -7 15 0 -1.04 0.99
 7 -15 0 -1.54 1.09
 -7 -15 0 -0.65 1.15
 7 -15 0 -0.18 1.01
 7 15 0 -2.58 1.22
 -7 15 0 -0.31 1.15
 7 15 0 -1.67 1.22
 7 15 0 0.63 1.01
 -7 -15 0 1.26 1.21
 7 16 0 -1.72 1.34
 -7 16 0 -0.61 1.14
 -7 16 0 0.58 1.28
 7 -16 0 -0.44 1.15
 7 16 0 -0.85 1.25
 7 16 0 -0.87 1.41
 -7 -16 0 1.5 1.42
 -7 16 0 0.57 1.35
 7 -16 0 2.16 1.33
 -7 -16 0 -0.69 1.48
 -8 0 0 268.03 6.64
 -8 0 0 275.71 6.71
 -8 1 0 74.8 2.01
 8 1 0 74.86 1.97
 -8 1 0 73.7 1.92
 -8 -1 0 72.85 1.97
 -8 -1 0 74.55 2.09
 8 2 0 4.32 0.45
 -8 -2 0 4.73 0.4
 -8 -2 0 4.95 0.42
 -8 -2 0 3.86 0.5
 8 2 0 4.61 0.4
 -8 -2 0 5.14 0.46
 8 3 0 2.74 0.45
 -8 -3 0 2.34 0.47
 -8 3 0 1.97 0.34
 -8 3 0 1.96 0.33
 8 -3 0 1.63 0.36
 8 3 0 1.85 0.42
 8 3 0 2.64 0.47
 -8 -3 0 1.68 0.44
 -8 -3 0 1.65 0.44
 8 4 0 27.5 1.08
 8 4 0 25.54 1.06
 -8 -4 0 24.35 1.27
 -8 4 0 25.76 0.92
 -8 4 0 25.67 0.93
 8 -4 0 25.99 0.92
 -8 -4 0 27.98 1.11
 -8 -4 0 25.11 1.05
 -8 -4 0 28 1.03
 -8 4 0 25.43 0.87
 8 4 0 26.33 1.04
 -8 5 0 36.88 1.2
 8 -5 0 37.74 1.17
 8 5 0 34.72 1.33
 8 5 0 34.46 1.29
 -8 -5 0 35.2 1.48
 -8 -5 0 38.32 1.32
 -8 -5 0 35.35 1.33
 -8 5 0 37.41 1.2
 8 6 0 89.21 2.45
 -8 -6 0 89.29 2.58
 -8 -6 0 90.65 2.45
 -8 6 0 87.35 2.39
 8 6 0 86.8 2.46
 -8 6 0 87.9 2.38
 8 6 0 86.52 2.47
 -8 -6 0 89.07 2.45
 -8 -6 0 89.37 2.52
 8 -6 0 86.46 2.37
 -8 7 0 18.77 1.05
 -8 -7 0 17.53 1.18
 8 7 0 20.65 1.21
 8 7 0 19.2 1.16
 -8 7 0 19.66 1.06
 8 7 0 19.23 1.12
 -8 -7 0 18.74 1.17
 8 -7 0 17.22 1.02
 -8 -7 0 18.04 1.27
 -8 -8 0 24.75 1.36
 -8 8 0 27.37 1.27
 8 -8 0 24.86 1.25
 -8 -8 0 26.5 1.43
 8 -8 0 26.89 1.3
 -8 -8 0 27.07 1.38
 -8 8 0 25.89 1.27
 8 8 0 28.64 1.33
 8 8 0 27.73 1.43
 -8 -8 0 27.43 1.52
 8 8 0 25.59 1.37
 8 9 0 82.96 2.55
 8 -9 0 80.44 2.44
 -8 -9 0 83.01 2.58
 8 9 0 85.57 2.58
 -8 -9 0 82.72 2.53
 -8 9 0 76.73 2.41
 -8 9 0 83.95 2.45
 -8 9 0 79.56 2.45
 -8 -9 0 83.73 2.61
 8 9 0 83.69 2.5
 8 -9 0 80.68 2.47
 -8 -9 0 82.64 2.54
 8 10 0 3.66 1.07
 -8 10 0 2.03 0.83
 8 10 0 1.51 0.86
 -8 -10 0 2.83 0.8
 8 10 0 2.98 0.84
 -8 -10 0 3.02 0.93
 8 -10 0 2.18 0.81
 -8 10 0 3.43 0.85
 -8 10 0 3.19 0.74
 8 -10 0 2.91 0.79
 -8 -10 0 2.39 0.74
 -8 -10 0 2.16 0.85
 8 -11 0 0.54 0.9
 8 11 0 0.19 0.83
 8 11 0 2 0.87
 -8 11 0 -0.09 0.76
 -8 -11 0 0.94 0.92
 -8 11 0 2.28 0.87
 -8 -11 0 0.76 0.92
 8 -11 0 0.57 0.92
 -8 11 0 1.29 0.86
 -8 -12 0 14.38 1.17
 8 -12 0 13.21 1.16
 8 12 0 12.1 1.13
 -8 -12 0 12.74 1.03
 -8 -12 0 11.63 1.13
 8 -12 0 11.76 1.2
 8 12 0 14.74 1.28
 -8 12 0 15.17 1.16
 -8 12 0 12.91 1.07
 -8 12 0 12.76 1.05
 8 12 0 15.35 1.22
 8 13 0 1.59 1.16
 -8 13 0 -0.35 0.88
 8 -13 0 -0.28 1.03
 -8 13 0 0.02 1.09
 -8 -13 0 -0.53 1.02
 -8 -13 0 0.73 0.8
 8 -13 0 1.77 0.99
 -8 -13 0 1.92 1.04
 -8 13 0 0.78 0.97
 -8 -13 0 0.44 1.01
 8 13 0 0.84 1.04
 8 13 0 2.38 0.95
 8 -14 0 2.92 1.06
 -8 -14 0 2.38 0.97
 -8 14 0 1.86 0.97
 -8 -14 0 4.1 1.2
 -8 14 0 2.57 1.09
 -8 -14 0 1.32 1.11
 -8 -14 0 1.99 1.17
 -8 14 0 3.43 1.04
 8 14 0 2.53 1.25
 8 14 0 4.08 1.03
 -8 -15 0 3.6 1.18
 8 15 0 1.22 1.33
 8 15 0 3.69 1.26
 -8 15 0 4.02 1.21
 8 15 0 1.06 1.1
 -8 -15 0 2.46 1
 -8 15 0 2.69 1.1
 8 -15 0 2.42 1.15
 -8 15 0 2.77 1.18
 -8 -15 0 1.74 1.3
 -8 16 0 2.61 1.29
 -8 -16 0 0.62 1.4
 -8 16 0 0.77 1.13
 -8 -16 0 1.66 1.25
 -8 16 0 1.37 1.29
 -8 -16 0 0.16 1.09
 8 16 0 3.21 1.37
 8 16 0 0.23 1.42
 8 -16 0 -0.23 1.28
 8 16 0 1.72 1.5
 -9 0 0 1.31 0.4
 -9 1 0 -0.17 0.36
 -9 1 0 -0.12 0.32
 -9 -1 0 -0.2 0.41
 9 1 0 0.52 0.38
 -9 -2 0 -0.28 0.45
 9 2 0 -0.36 0.4
 9 2 0 -0.3 0.33
 -9 -2 0 -0.19 0.34
 -9 2 0 0.08 0.3
 -9 -3 0 0.01 0.44
 -9 -3 0 -0.87 0.48
 -9 -3 0 -0.27 0.42
 -9 -3 0 -0.22 0.4
 9 3 0 0.36 0.43
 9 3 0 -0.51 0.39
 9 3 0 -0.45 0.42
 -9 -4 0 -0.02 0.46
 -9 -4 0 0.11 0.48
 -9 4 0 0.82 0.36
 9 4 0 0.04 0.47
 -9 4 0 -0.51 0.58
 -9 -4 0 -0.22 0.49
 9 4 0 0.25 0.47
 9 4 0 0.42 0.45
 -9 -4 0 0.78 0.5
 9 5 0 0.28 0.53
 -9 -5 0 -0.1 0.53
 -9 5 0 0.21 0.42
 9 -5 0 -0.3 0.42
 -9 -5 0 -0.22 0.5
 9 5 0 -0.16 0.49
 -9 -5 0 -0.09 0.51
 -9 -5 0 -0.37 0.52
 9 5 0 -0.4 0.49
 -9 6 0 0.24 0.49
 -9 -6 0 -0.82 0.55
 -9 -6 0 -0.08 0.57
 9 6 0 -0.75 0.54
 9 6 0 -0.46 0.56
 -9 -6 0 -0.72 0.54
 9 -6 0 0.69 0.49
 -9 -6 0 -0.87 0.56
 9 6 0 -0.96 0.55
 -9 6 0 -0.08 0.51
 -9 -7 0 0.71 0.62
 9 7 0 -0.31 0.6
 9 -7 0 0.55 0.55
 -9 -7 0 0.23 0.62
 9 7 0 0.69 0.63
 -9 -7 0 -0.12 0.6
 -9 7 0 0.46 0.56
 -9 -7 0 0.46 0.66
 -9 7 0 0.49 0.57
 -9 -8 0 0.02 0.67
 -9 8 0 0.55 0.64
 -9 8 0 0.36 0.62
 -9 -8 0 0.23 0.66
 9 -8 0 1 0.63
 -9 -8 0 1.25 0.7
 9 8 0 0.7 0.77
 -9 -8 0 1.25 0.69
 9 8 0 1.16 0.69
 9 -8 0 1.45 0.67
 -9 8 0 0.67 0.59
 9 8 0 -0.59 0.71
 9 9 0 0 0.81
 -9 -9 0 0.43 0.86
 9 9 0 -0.3 0.74
 -9 9 0 0.48 0.71
 -9 -9 0 0.74 0.81
 9 -9 0 -0.57 0.73
 -9 9 0 0 0.65
 -9 9 0 0.82 0.72
 9 -9 0 -1.26 0.73
 -9 -9 0 0.2 0.7
 -9 -9 0 1.7 0.76
 9 9 0 0.36 0.73
 -9 -10 0 -0.28 1.28
 -9 -10 0 -0.23 0.82
 -9 -10 0 0.51 0.82
 -9 -10 0 0.79 0.85
 9 10 0 -0.84 0.74
 9 -10 0 -2.38 1.37
 9 10 0 0.89 0.89
 -9 10 0 -1.3 0.77
 9 -10 0 -0.18 0.79
 9 11 0 0.35 1.01
 -9 -11 0 -0.42 0.87
 -9 -11 0 -0.03 1.01
 -9 -11 0 -0.15 0.89
 -9 11 0 1.29 0.78
 9 11 0 -0.45 0.89
 9 11 0 0.83 0.89
 9 -11 0 -1.52 0.81
 -9 -11 0 -0.1 0.78
 -9 11 0 0.29 0.86
 9 -11 0 -0.37 0.9
 -9 -12 0 -0.2 0.79
 -9 12 0 0.52 0.84
 9 12 0 -0.33 0.91
 9 -12 0 -1.51 0.9
 -9 -12 0 1.83 0.98
 -9 -12 0 -1.04 0.98
 -9 -12 0 -1.06 0.93
 -9 12 0 -0.15 0.89
 -9 12 0 -0.67 0.88
 9 12 0 1.43 1.1
 9 -12 0 -0.49 0.92
 -9 13 0 -0.55 1.02
 9 -13 0 0.7 0.95
 -9 -13 0 0.42 0.8
 9 13 0 1.02 1.06
 9 13 0 0.09 1.11
 -9 13 0 -0.18 0.85
 -9 -13 0 -0.69 1.05
 -9 -13 0 -0.92 0.99
 -9 13 0 -1.69 0.91
 9 13 0 -0.44 1.02
 -9 -13 0 0.46 1.01
 9 14 0 1.14 1.14
 -9 -14 0 2.09 1.19
 9 -14 0 0.84 1.01
 9 -14 0 -0.08 1.11
 -9 -14 0 0.2 1.15
 -9 -14 0 1.13 1.1
 9 14 0 -1.97 1.49
 -9 14 0 -0.28 1.09
 -9 14 0 0.38 1.08
 9 14 0 1.61 1.13
 9 15 0 -1.99 1.34
 9 -15 0 -0.44 1.12
 -9 -15 0 -0.5 1.12
 -9 -15 0 -0.65 1.17
 9 15 0 0.94 1.17
 -9 -15 0 -0.63 1.27
 -9 15 0 1.83 1.14
 -9 15 0 -0.1 1.15
 -9 15 0 0.69 1.05
 9 15 0 0.41 1.25
 -10 0 0 41.42 1.37
 -10 0 0 39.36 1.22
 -10 -1 0 18.67 1.03
 -10 1 0 16.8 0.76
 -10 1 0 17.92 0.93
 -10 -1 0 19.33 0.82
 -10 -2 0 59.91 1.59
 10 2 0 58.44 1.57
 -10 2 0 61.06 1.62
 10 2 0 57.87 1.7
 -10 2 0 58.43 1.72
 -10 3 0 40.49 1.34
 -10 -3 0 45.18 1.61
 -10 -3 0 43.33 1.28
 -10 -3 0 45.67 1.43
 10 3 0 42.92 1.41
 -10 -3 0 42.31 1.3
 10 3 0 42.96 1.29
 -10 -4 0 22.45 1.25
 -10 -4 0 21.04 0.96
 10 4 0 20.89 0.96
 -10 -4 0 22.1 0.95
 10 -4 0 21.72 0.83
 -10 -4 0 21.59 1.06
 -10 4 0 19.62 0.81
 -10 4 0 20.93 0.8
 10 4 0 20.81 1.02
 10 4 0 22.19 0.94
 10 5 0 28.76 1.25
 10 -5 0 31.5 1.08
 -10 5 0 29.9 1.06
 -10 -5 0 30.96 1.17
 10 5 0 31.9 1.18
 10 5 0 29.06 1.18
 -10 -5 0 28.01 1.19
 -10 5 0 28.13 1.04
 -10 -5 0 31.37 1.29
 -10 -5 0 30.9 1.46
 10 6 0 63.46 1.96
 -10 -6 0 65.54 2.04
 -10 -6 0 66.49 2.17
 10 -6 0 66.63 1.87
 10 -6 0 63.56 1.82
 -10 -6 0 64.1 1.96
 10 6 0 65.84 2.01
 -10 6 0 63.99 1.84
 10 6 0 65.15 1.94
 -10 -6 0 63.23 1.94
 -10 6 0 63.05 1.84
 -10 -7 0 87.85 2.5
 10 7 0 90.38 2.57
 -10 7 0 81.89 2.39
 -10 -7 0 85.5 2.59
 -10 -7 0 85.34 2.48
 10 -7 0 87.95 2.42
 10 -7 0 83.8 2.37
 -10 -7 0 89.39 2.7
 -10 7 0 87.13 2.4
 10 7 0 86.15 2.5
 10 7 0 86.41 2.51
 10 8 0 3.84 0.77
 -10 -8 0 4.99 0.78
 -10 -8 0 3.15 0.73
 10 -8 0 5.38 0.73
 10 8 0 4.57 0.76
 -10 -8 0 4.29 0.78
 -10 8 0 3.63 0.64
 10 -8 0 4.04 0.67
 -10 8 0 4.95 0.72
 -10 -8 0 5.09 0.8
 -10 8 0 4.52 0.7
 10 -9 0 3.8 0.73
 -10 -9 0 4.49 0.88
 10 9 0 4.92 0.84
 10 -9 0 5.28 0.79
 -10 9 0 3.55 0.79
 -10 9 0 4.64 0.77
 10 9 0 3.74 1.31
 -10 9 0 4.22 0.7
 10 9 0 4.69 0.89
 -10 -9 0 4.27 0.87
 -10 -9 0 4.26 0.85
 -10 -9 0 5.38 0.87
 -10 10 0 10.45 0.99
 -10 10 0 10.38 0.9
 10 -10 0 12.65 0.96
 -10 -10 0 10.39 0.97
 10 10 0 10.68 1.01
 -10 -10 0 8.97 1.14
 10 10 0 12.42 1.08
 -10 10 0 11.38 0.95
 -10 -10 0 9.16 0.99
 10 -10 0 10.95 1.01
 -10 -10 0 12.57 1.1
 10 10 0 9.99 1.08
 -10 -11 0 5.43 0.87
 10 11 0 6.77 1.03
 -10 -11 0 5.59 1
 10 11 0 7.42 0.99
 10 -11 0 5.91 0.91
 -10 -11 0 5.09 0.97
 10 -11 0 6.67 0.96
 -10 11 0 6.65 0.93
 -10 11 0 5.23 0.94
 10 11 0 6.7 0.98
 10 -12 0 0.57 0.96
 -10 -12 0 1.48 1.01
 -10 12 0 0.46 0.95
 -10 -12 0 -0.03 1.04
 10 -12 0 1.84 0.95
 -10 -12 0 1.52 1.12
 10 12 0 0.45 1.02
 10 12 0 2.26 1.03
 -10 -12 0 -0.74 0.79
 -10 12 0 0.82 0.86
 -10 12 0 -1.04 0.93
 10 13 0 3.33 1.14
 -10 -13 0 0.25 0.91
 -10 -13 0 1.92 1.12
 -10 13 0 0.52 0.93
 -10 13 0 1.68 1.05
 10 13 0 2.54 1.12
 -10 -13 0 0.88 1.04
 -10 13 0 2.01 0.99
 10 13 0 3.63 1.13
 -10 -13 0 1.84 1.08
 10 -13 0 1.82 1
 10 -14 0 0.79 1.05
 10 14 0 1.43 0.97
 -10 14 0 1.34 1.13
 -10 -14 0 0.65 0.97
 10 14 0 3.02 1.21
 -10 14 0 0.45 1.06
 -10 -14 0 -0.79 1.1
 10 -14 0 -0.45 1.01
 -10 -14 0 2.24 1.25
 -10 -14 0 -1.37 1.14
 -10 -15 0 2.18 1.26
 -10 15 0 2.42 1.09
 10 15 0 3.59 1.46
 10 -15 0 1.29 1.16
 -10 -15 0 2.67 1.36
 -10 15 0 3.67 1.25
 10 15 0 5.74 1.37
 10 -15 0 4.54 1.2
 -10 15 0 2.91 1.3
 -10 -15 0 4.19 1.16
 -11 0 0 -0.09 0.42
 -11 0 0 -0.7 0.35
 -11 -1 0 0.49 0.39
 -11 1 0 -0.36 0.34
 -11 -1 0 0.41 0.46
 -11 1 0 0.04 0.4
 -11 2 0 0.5 0.36
 11 2 0 0.36 0.44
 -11 -2 0 0.7 0.43
 -11 -2 0 0.32 0.31
 -11 -2 0 0.43 0.55
 -11 -3 0 -0.13 0.41
 -11 -3 0 0.05 0.48
 11 3 0 0.17 0.46
 -11 -3 0 0.92 0.55
 -11 3 0 0.1 0.36
 -11 -3 0 -0.2 0.39
 11 3 0 -0.33 0.39
 -11 3 0 -0.39 0.39
 -11 -4 0 0.81 0.48
 -11 -4 0 -0.24 0.53
 11 4 0 -0.95 0.48
 -11 -4 0 0.36 0.56
 11 4 0 0.09 0.44
 11 4 0 -0.97 0.49
 11 -5 0 0.07 0.46
 11 -5 0 -0.03 0.24
 11 5 0 0.55 0.55
 11 5 0 -0.64 0.52
 -11 -5 0 0.4 0.59
 -11 5 0 0.38 0.42
 -11 -5 0 -0.28 0.54
 -11 -5 0 -0.61 0.53
 -11 -5 0 0.21 0.6
 11 5 0 -0.44 0.53
 11 6 0 -0.15 0.57
 11 6 0 -0.31 0.61
 -11 6 0 -0.52 0.49
 -11 6 0 0.19 0.51
 -11 -6 0 0.23 0.6
 11 6 0 0.72 0.63
 -11 -6 0 -0.04 0.61
 11 -6 0 -0.02 0.53
 -11 -6 0 -0.48 0.63
 -11 -6 0 -0.54 0.61
 -11 -7 0 -0.03 0.72
 11 7 0 -0.54 0.68
 -11 -7 0 -1.07 0.66
 -11 -7 0 -0.73 0.64
 11 7 0 -0.77 0.7
 11 -7 0 -0.43 0.62
 11 7 0 0.94 0.66
 -11 7 0 0.46 0.57
 -11 7 0 0.1 0.57
 11 -7 0 0.04 0.56
 -11 -7 0 0.8 0.67
 11 -8 0 1.01 0.62
 -11 -8 0 1.49 0.77
 11 8 0 -0.95 0.78
 -11 -8 0 -0.17 0.77
 11 -8 0 0.5 0.68
 11 8 0 -0.59 0.74
 -11 8 0 0.91 0.66
 -11 -8 0 0.81 0.7
 11 8 0 -0.13 0.74
 -11 8 0 -0.43 0.65
 -11 -8 0 -0.14 0.72
 -11 -9 0 0.56 0.77
 11 -9 0 -0.02 0.67
 -11 -9 0 -0.83 1.38
 -11 9 0 -0.36 0.7
 11 -9 0 0.25 0.75
 -11 9 0 0.16 0.71
 11 9 0 1.17 0.81
 -11 -9 0 -1.13 0.84
 -11 -9 0 -1.35 0.77
 -11 9 0 0.62 0.67
 11 9 0 0.38 0.81
 11 9 0 0 0.81
 -11 -10 0 -0.99 0.8
 -11 10 0 -0.57 0.72
 11 10 0 -1.04 0.91
 11 -10 0 0.85 0.76
 11 10 0 -1.3 0.82
 -11 -10 0 -1.13 0.84
 11 -10 0 -0.12 0.79
 -11 10 0 0.09 0.93
 -11 -10 0 -0.39 0.87
 -11 -10 0 -1.36 0.79
 -11 10 0 -0.15 0.78
 -11 -11 0 -1.13 0.81
 11 -11 0 0.61 0.85
 11 11 0 -1.07 0.9
 -11 -11 0 -0.09 0.85
 -11 -11 0 0.3 0.92
 -11 11 0 1.01 0.89
 -11 11 0 0.61 0.87
 11 -11 0 1.28 0.85
 -11 -11 0 1.42 0.93
 11 11 0 -0.36 0.97
 11 11 0 1.8 1.01
 -11 11 0 0.08 0.8
 -11 -12 0 -0.33 1.03
 11 -12 0 0.86 0.9
 11 12 0 -1.01 1
 11 -12 0 -1.09 0.91
 -11 -12 0 -0.9 0.97
 -11 12 0 0.28 0.96
 -11 12 0 2.62 1.47
 11 12 0 -0.54 0.94
 -11 -12 0 -0.48 0.96
 11 12 0 -1.4 1.01
 -11 12 0 -0.33 0.93
 -11 -13 0 0.21 0.97
 -11 13 0 -0.24 1.07
 11 13 0 -0.56 1.06
 -11 -13 0 -2.13 1.07
 11 13 0 2.29 1.1
 11 -13 0 -0.29 0.96
 -11 -13 0 0.19 1.06
 -11 -13 0 0.68 1.12
 11 -13 0 1.43 0.94
 -11 13 0 0.2 0.98
 11 13 0 0.18 1.1
 -11 13 0 -0.07 0.93
 -11 14 0 -1.24 1.01
 -11 -14 0 0.46 1.13
 -11 -14 0 -1 1.2
 -11 14 0 1.47 1.03
 11 14 0 -0.89 1.19
 -11 14 0 1.08 1.15
 11 14 0 -1.1 1.12
 11 14 0 0.44 1.58
 11 -14 0 -0.66 1.07
 -12 0 0 44.61 1.51
 -12 0 0 40.62 1.31
 -12 -1 0 81.54 2.33
 -12 -1 0 78.69 2.16
 -12 1 0 75.51 2.12
 -12 1 0 80.55 2.26
 12 2 0 5.02 0.53
 -12 -2 0 5 0.6
 -12 2 0 3.83 0.43
 -12 2 0 3.98 0.49
 12 3 0 32.19 1.04
 -12 3 0 28.83 1.19
 -12 -3 0 33.45 1.48
 -12 -3 0 29.46 1.06
 -12 3 0 31.75 1.08
 12 3 0 31.3 1.22
 -12 -4 0 6.4 0.53
 -12 -4 0 6.47 0.65
 -12 -4 0 4.61 0.68
 12 4 0 5.97 0.54
 12 4 0 4.88 0.61
 -12 -4 0 6.66 0.58
 12 5 0 17.81 1.05
 -12 -5 0 16.59 0.98
 -12 -5 0 18.53 1.04
 -12 5 0 16.49 0.8
 12 5 0 16.78 1.13
 12 5 0 17.82 0.99
 -12 -5 0 19.98 1.43
 12 6 0 14.74 1.07
 12 6 0 16.91 1.22
 -12 -6 0 14.93 1.08
 -12 6 0 16.04 0.9
 12 -6 0 17.46 0.95
 12 6 0 17.62 1.14
 -12 6 0 15.82 1.3
 -12 -6 0 16.11 1.28
 -12 -6 0 16.76 1.47
 -12 -6 0 14.14 1.14
 12 -7 0 12.91 0.95
 12 -7 0 12 1.04
 -12 7 0 13.11 1
 12 7 0 12.66 0.89
 -12 -7 0 13.72 1.21
 -12 -7 0 12.02 0.88
 -12 7 0 13.34 0.96
 12 7 0 13.49 0.9
 -12 -7 0 10.79 0.95
 12 7 0 13.13 0.93
 -12 -7 0 13.02 0.96
 12 8 0 9.98 0.93
 12 -8 0 10.17 0.83
 -12 -8 0 10.45 0.94
 -12 8 0 10.99 0.8
 -12 -8 0 9.99 0.97
 -12 -8 0 10.58 0.94
 12 -8 0 9.95 0.75
 -12 -9 0 2.48 0.85
 -12 9 0 3.2 0.75
 -12 9 0 2.81 0.71
 12 9 0 1.48 0.84
 -12 9 0 2.93 0.75
 12 -9 0 3.3 0.78
 12 9 0 3.44 0.89
 12 -9 0 3.16 0.73
 -12 -9 0 1.79 0.79
 -12 -9 0 4.1 1.55
 -12 -9 0 1.14 0.85
 12 -10 0 18.46 1.31
 -12 10 0 16.91 1.36
 -12 -10 0 14.54 1.14
 12 10 0 17.24 1.2
 12 -10 0 17.02 1.41
 -12 10 0 15.31 1.02
 -12 -10 0 15.65 1.18
 -12 -10 0 17.36 1.23
 -12 10 0 15.92 1.04
 12 10 0 17.37 1.2
 -12 -11 0 7.41 1.05
 -12 11 0 6.22 0.94
 -12 11 0 6.49 0.91
 -12 11 0 9.05 0.99
 -12 -11 0 8.39 1.07
 12 11 0 8.8 1.12
 12 11 0 6.31 1.05
 12 -11 0 5.77 0.98
 12 11 0 7.28 1.12
 -12 -11 0 6.3 1.01
 -12 12 0 0.55 1.45
 -12 -12 0 -0.05 0.93
 12 12 0 0.35 1.1
 -12 12 0 1.62 0.92
 -12 -12 0 -0.22 0.99
 -12 -12 0 1.92 0.98
 12 12 0 1.1 1.07
 -12 12 0 -0.83 0.9
 12 12 0 -0.52 1.01
 -12 -13 0 14.85 1.34
 -12 13 0 16.98 1.25
 -12 -13 0 16.24 1.32
 12 13 0 16.73 1.44
 -12 13 0 14.06 1.23
 12 13 0 14.08 1.3
 -12 -13 0 15.43 1.42
 12 -13 0 15.66 1.22
 -12 13 0 13.95 1.19
 12 -13 0 15.07 1.32
 12 13 0 15.04 1.4
 -12 -14 0 2.71 1.16
 -12 -14 0 1.66 1.2
 -12 -14 0 3.66 1.31
 12 14 0 1.26 1.27
 -12 14 0 4.65 1.1
 12 -14 0 3.44 1.14
 -12 14 0 3.84 1.12
 12 14 0 4.53 1.28
 -13 0 0 0.69 0.5
 -13 -1 0 0.64 0.46
 -13 -1 0 1.05 0.58
 -13 1 0 0.15 0.46
 -13 2 0 0.3 0.41
 -13 -2 0 1.13 0.49
 -13 -2 0 -0.09 0.59
 -13 2 0 -0.72 0.46
 -13 -3 0 0.44 0.43
 13 3 0 -0.49 0.53
 -13 -3 0 -0.18 0.37
 13 3 0 0.12 0.4
 -13 3 0 -0.48 0.39
 13 3 0 0.08 0.43
 -13 -4 0 -0.54 0.45
 -13 -4 0 0.15 0.6
 -13 -4 0 -0.77 0.5
 -13 -4 0 -0.15 0.65
 13 4 0 -0.62 0.48
 -13 4 0 0.42 0.42
 13 5 0 -0.44 0.62
 13 5 0 -0.1 0.55
 -13 -5 0 1.06 0.68
 -13 -5 0 -0.51 0.7
 13 5 0 0.6 0.58
 -13 -5 0 -0.38 0.54
 13 6 0 -1.16 0.61
 -13 6 0 -0.42 0.49
 -13 6 0 -0.26 0.45
 13 -6 0 -0.36 0.48
 -13 -6 0 -0.36 0.64
 -13 -6 0 -0.26 0.62
 -13 -6 0 0.06 0.71
 13 6 0 -0.62 0.59
 13 6 0 -1.02 0.65
 -13 -6 0 0.28 0.8
 -13 -7 0 0.32 0.78
 13 7 0 -0.76 0.68
 -13 7 0 -0.49 0.57
 13 7 0 0.11 0.7
 -13 7 0 0.71 0.55
 -13 -7 0 -0.16 0.68
 -13 -7 0 -0.36 0.69
 -13 -7 0 -0.14 0.74
 13 7 0 0.5 0.71
 13 -7 0 -1.09 0.58
 13 8 0 0.29 0.77
 13 8 0 -0.86 0.72
 13 8 0 -0.44 0.77
 -13 -8 0 1.49 1.3
 -13 8 0 0.76 0.61
 -13 8 0 -0.03 0.62
 -13 -8 0 0.18 0.75
 13 -8 0 -0.56 0.67
 -13 -8 0 0.85 0.85
 13 -8 0 0.1 0.61
 -13 -8 0 0.04 0.78
 -13 -9 0 1.19 0.85
 -13 9 0 0.58 0.7
 13 9 0 1.21 0.88
 -13 -9 0 -0.53 0.8
 13 -9 0 0.31 0.69
 -13 -9 0 -0.22 0.91
 13 9 0 1.43 0.81
 -13 -9 0 0.67 0.84
 -13 9 0 1.02 0.68
 -13 9 0 -0.14 0.69
 -13 10 0 0.47 0.73
 -13 -10 0 0.18 0.89
 -13 -10 0 1.07 1
 13 10 0 -0.68 0.88
 -13 -10 0 0.49 0.86
 -13 10 0 -0.1 0.76
 13 10 0 1.88 0.97
 13 10 0 -1.16 0.84
 13 -10 0 0.06 0.79
 -13 -10 0 1.46 0.9
 -13 10 0 -0.31 0.76
 -13 -11 0 -0.92 0.91
 -13 11 0 -0.79 0.83
 -13 -11 0 -0.12 1
 13 11 0 -0.02 0.99
 13 -11 0 1.14 0.82
 -13 11 0 -0.62 0.79
 13 11 0 -1.79 0.88
 -13 -11 0 0.38 0.95
 -13 -11 0 -0.93 0.89
 13 11 0 1.13 1.06
 -13 -12 0 1.24 0.98
 -13 12 0 -1.14 0.91
 -13 -12 0 1.28 1.07
 13 12 0 -0.36 1.08
 -13 -12 0 2.2 1.12
 13 12 0 1.68 1.07
 -13 -12 0 -1.17 1.04
 -13 12 0 0.23 0.89
 13 12 0 0.13 1.03
 13 -12 0 -0.09 0.99
 13 -12 0 0.05 0.89
 13 13 0 -0.41 1.19
 -13 -13 0 1.71 1.19
 -13 -13 0 -2.49 1.2
 13 13 0 1.84 1.32
 13 -13 0 2.15 1.04
 13 13 0 0.07 1.08
 -13 -13 0 -0.06 1.05
 -13 13 0 -1.53 0.96
 -13 -13 0 0.29 1.14
 -13 13 0 -0.36 1.01
 -13 13 0 1.33 1.02
 13 -13 0 -2.18 1.03
 -14 0 0 69 2.14
 -14 0 0 66.83 1.94
 -14 1 0 5.2 0.6
 -14 -1 0 5.19 0.66
 -14 -1 0 5.28 0.56
 -14 1 0 4.01 0.51
 -14 2 0 38.84 1.34
 -14 2 0 41.68 1.54
 -14 -2 0 43.19 1.47
 -14 -2 0 41.93 1.74
 -14 -3 0 1.67 0.7
 -14 3 0 1.51 0.53
 -14 3 0 0.78 0.44
 14 3 0 0.63 0.58
 -14 -4 0 38.28 1.3
 14 4 0 38.14 1.52
 14 4 0 38.25 1.27
 -14 4 0 38.14 1.29
 -14 -5 0 7.51 0.63
 -14 -5 0 9.68 0.83
 -14 -5 0 9.04 1.24
 14 5 0 8.18 0.76
 -14 -5 0 8.87 0.7
 14 5 0 9.25 0.66
 -14 5 0 7.45 0.57
 -14 -6 0 1.52 0.76
 14 6 0 0.68 0.64
 -14 -6 0 1 0.78
 -14 -6 0 0.4 0.66
 14 6 0 1.88 0.68
 14 6 0 0.42 0.69
 14 7 0 13.49 0.98
 -14 7 0 13.07 0.92
 -14 -7 0 14.82 1.16
 14 7 0 12.86 0.93
 -14 -7 0 15.1 1.08
 14 7 0 14.09 1.38
 -14 7 0 13.94 0.94
 -14 -7 0 12.23 1.03
 -14 -7 0 14.23 0.94
 -14 8 0 9.72 0.76
 -14 8 0 8.44 0.74
 14 8 0 9.72 0.9
 14 8 0 8.99 0.92
 14 -8 0 9.09 0.74
 -14 -8 0 7.73 1.64
 -14 -8 0 9.01 0.89
 14 8 0 9.76 0.95
 14 9 0 2.6 0.88
 -14 -9 0 2.61 0.98
 -14 9 0 4.15 0.75
 14 -9 0 3.53 0.72
 -14 9 0 4.35 0.73
 -14 -9 0 3.13 0.91
 -14 -9 0 4.03 0.98
 14 9 0 4.13 0.83
 14 -9 0 4.49 0.8
 -14 9 0 5 0.89
 -14 -9 0 3.64 0.85
 14 9 0 2.71 0.91
 -14 10 0 0.41 0.79
 14 -10 0 0.66 0.75
 14 10 0 0.09 0.91
 -14 -10 0 1.73 1.03
 14 -10 0 1.81 0.82
 -14 -10 0 2.44 0.97
 -14 -10 0 1.84 0.96
 14 10 0 2.58 0.98
 -14 10 0 1.82 0.79
 -14 -10 0 1.32 0.9
 14 10 0 0.28 0.92
 -14 -11 0 3.51 1.1
 14 -11 0 5.78 0.95
 14 11 0 2.97 1
 14 -11 0 4.37 0.89
 -14 11 0 6.45 0.88
 -14 11 0 4.53 0.88
 -14 -11 0 4.1 1.05
 14 11 0 5.85 1.13
 -14 -11 0 6.87 1.09
 14 11 0 3.51 1.08
 -14 11 0 5.27 0.89
 -14 -11 0 4.46 1.08
 -14 -12 0 20.97 1.52
 14 12 0 25.71 1.96
 -14 12 0 19.98 1.61
 14 12 0 20.43 1.39
 -14 12 0 18.33 1.51
 -14 -12 0 21.39 1.91
 -14 -12 0 22.23 1.76
 14 12 0 21.57 1.5
 -14 13 0 1.33 1.01
 14 13 0 -0.45 1.13
 14 -13 0 2.46 1.04
 -14 -13 0 4.65 1.35
 -14 13 0 1.05 1.06
 14 -13 0 3.61 1.04
 -14 -13 0 0.66 1.1
 -14 13 0 2.38 1.06
 -14 -13 0 2.88 1.17
 -15 0 0 -0.14 0.48
 -15 0 0 0.61 0.59
 -15 -1 0 -0.39 0.6
 -15 -1 0 -0.05 0.51
 -15 1 0 1.13 0.57
 -15 1 0 -0.45 0.46
 -15 -2 0 -0.57 0.54
 -15 2 0 0.19 0.47
 -15 -2 0 1.05 0.7
 -15 -3 0 0.84 0.61
 -15 3 0 -0.16 0.48
 -15 -3 0 -0.12 0.68
 -15 3 0 -0.69 0.51
 -15 -4 0 0.5 0.45
 -15 4 0 -0.58 0.49
 -15 4 0 -0.87 0.45
 -15 -4 0 -0.18 0.52
 15 4 0 0.02 0.63
 -15 -4 0 1.28 0.67
 -15 -4 0 -0.16 1.14
 -15 -5 0 1.1 0.74
 -15 5 0 0.12 0.48
 -15 -5 0 0.43 0.56
 -15 5 0 -0.54 0.48
 15 5 0 -0.09 0.65
 -15 -5 0 -0.89 0.53
 15 5 0 -0.76 0.54
 -15 -5 0 1.4 0.76
 -15 -6 0 1.15 0.8
 15 6 0 -0.66 0.66
 -15 -6 0 0.35 0.83
 -15 -6 0 0.3 0.65
 -15 -6 0 0.09 0.59
 15 6 0 -0.46 0.62
 15 6 0 0.48 0.71
 -15 -7 0 1.66 0.88
 -15 -7 0 -0.86 0.65
 -15 -7 0 -0.34 1.22
 15 7 0 -0.27 0.71
 -15 -7 0 1.47 0.88
 15 7 0 1.03 0.78
 -15 -8 0 -0.4 0.9
 -15 -8 0 1.1 0.8
 -15 8 0 -0.17 0.59
 -15 -8 0 0.07 0.75
 15 8 0 -0.68 0.78
 -15 8 0 0.11 0.57
 15 -8 0 -1.05 0.59
 15 8 0 -0.1 0.82
 -15 -8 0 1.62 0.92
 -15 9 0 -0.23 0.63
 15 9 0 -0.69 0.82
 15 9 0 0.11 0.89
 -15 9 0 -0.96 0.7
 -15 -9 0 0.95 0.87
 -15 9 0 0.81 0.84
 -15 -9 0 -0.51 0.82
 15 9 0 -1.03 0.81
 15 -9 0 -0.92 0.66
 15 -10 0 0.88 0.75
 -15 -10 0 -1.2 0.87
 15 10 0 0.36 0.93
 -15 -10 0 -0.02 1.06
 15 10 0 -0.39 0.93
 -15 -10 0 0.64 1.01
 15 10 0 1.28 0.95
 -15 -10 0 -0.9 0.92
 -15 10 0 -0.23 0.78
 -15 10 0 -0.69 0.71
 -15 -11 0 0.61 1.02
 15 -11 0 1.36 0.83
 15 11 0 1.11 1
 15 11 0 1.75 1.08
 -15 11 0 0.13 0.78
 -15 -11 0 1.26 1.06
 -15 -11 0 -0.97 0.98
 -15 -11 0 -1.03 1.12
 15 11 0 0.84 1.01
 -15 11 0 -0.4 0.85
 -15 12 0 0.05 0.93
 15 12 0 1.88 1.2
 15 12 0 0.77 1.12
 -15 -12 0 -0.35 1.13
 -15 -12 0 0.76 1.14
 15 12 0 2.32 1.11
 15 -12 0 1.17 0.97
 -15 12 0 1.46 0.95
 -15 -12 0 3.14 1.25
 -15 -12 0 2.97 1.22
 -16 0 0 1.72 0.66
 -16 0 0 -0.42 0.51
 -16 -1 0 2.2 0.61
 -16 -1 0 1.62 0.69
 -16 1 0 1.23 0.52
 -16 2 0 9.96 0.87
 -16 2 0 9.35 0.76
 -16 -2 0 11.23 0.88
 -16 -2 0 12.11 1.07
 -16 3 0 0.84 0.5
 -16 3 0 0.83 0.57
 -16 -3 0 2.04 0.79
 -16 4 0 0.18 0.49
 16 4 0 -0.22 0.66
 -16 -4 0 -0.02 0.8
 -16 -4 0 0.06 0.69
 16 5 0 1.01 0.72
 16 5 0 1.02 0.55
 -16 5 0 1.72 0.52
 -16 -5 0 1.41 0.59
 -16 -5 0 2.6 0.78
 -16 -5 0 0.32 0.78
 16 6 0 15.08 1.08
 -16 -6 0 14.31 1.03
 -16 -6 0 14.73 1.15
 -16 -6 0 17.29 1.23
 -16 -6 0 18.39 1.49
 16 6 0 16.53 1.41
 -16 6 0 15.48 1
 16 7 0 -0.07 0.77
 -16 -7 0 0.11 0.74
 -16 -7 0 -0.05 1.56
 -16 -7 0 1.78 0.92
 -16 -7 0 0.31 0.65
 16 7 0 1.07 0.73
 16 7 0 0.76 0.69
 -16 -8 0 -0.24 0.81
 -16 -8 0 1.13 0.75
 -16 -8 0 1.67 0.96
 16 8 0 -0.01 0.87
 16 8 0 0.02 0.74
 16 8 0 1.72 0.83
 -16 -8 0 0.62 0.86
 -16 9 0 5.09 0.8
 -16 9 0 6.3 0.7
 -16 -9 0 3.98 0.87
 16 -9 0 4.81 0.73
 -16 -9 0 4.48 1.07
 -16 -9 0 4.36 0.94
 16 9 0 5 1.03
 16 10 0 7.76 1.01
 16 10 0 8.21 1.08
 -16 -10 0 5.3 0.99
 16 -10 0 7.13 0.86
 -16 10 0 8.14 0.87
 16 10 0 6.29 1.09
 -16 -10 0 6.43 1.04
 -16 10 0 7.28 0.84
 -16 10 0 5.61 0.9
 -16 -10 0 7.53 1.25
 -16 -10 0 8.42 1.23
 16 11 0 -0.19 1.07
 -16 11 0 1.53 0.88
 16 11 0 1.66 1.07
 -16 11 0 -1.25 0.91
 16 11 0 -0.31 1.12
 -16 -11 0 -1.27 1.02
 16 -11 0 -0.13 0.88
 -16 -11 0 0.42 1.03
 -17 0 0 3.35 0.67
 -17 1 0 0.12 0.52
 -17 1 0 0.45 0.64
 -17 -1 0 1.45 0.73
 -17 -1 0 0.16 0.57
 -17 2 0 -0.43 0.59
 -17 -2 0 1.21 0.65
 -17 2 0 -0.35 0.51
 -17 -2 0 -0.24 0.76
 -17 -3 0 0.79 0.75
 -17 -3 0 0.56 0.68
 -17 3 0 -0.41 0.52
 -17 -4 0 2.09 0.77
 -17 -4 0 1.2 0.81
 -17 -5 0 0.35 0.87
 -17 -5 0 1.37 0.81
 17 5 0 -0.67 0.72
 -17 -5 0 -0.51 0.57
 -17 5 0 0.34 0.54
 -17 -6 0 1.09 0.86
 -17 -6 0 1.4 0.77
 -17 -6 0 1.13 0.79
 17 6 0 0.23 1.11
 -17 -6 0 -0.33 0.86
 -17 7 0 -0.48 0.55
 -17 -7 0 -0.31 0.89
 17 7 0 -1.32 0.79
 -17 -7 0 -0.48 0.9
 -17 -7 0 -1.26 0.75
 -17 -7 0 -0.41 0.62
 -17 -8 0 -0.48 0.97
 -17 -8 0 0.47 0.8
 17 8 0 0.93 0.83
 17 8 0 1.49 0.88
 17 9 0 -0.5 0.81
 -17 -9 0 -1.29 0.85
 -17 -9 0 -0.09 1.08
 17 9 0 1.36 0.92
 -17 -9 0 0.9 0.83
 -17 -9 0 -1.5 0.96
 17 9 0 -0.38 0.97
 17 10 0 -1.97 0.97
 -17 -10 0 -0.9 0.96
 17 10 0 -0.13 0.92
 -17 10 0 -0.38 0.67
 -17 10 0 -0.85 0.84
 17 10 0 0.61 1.03
 -17 -10 0 -1.97 1.11
 -18 0 0 16.36 1.14
 -18 1 0 12.33 0.79
 -18 1 0 11.64 0.92
 -18 -1 0 13.68 1.11
 -18 -1 0 12.58 0.99
 -18 -2 0 1.66 0.8
 -18 2 0 0.71 0.68
 -18 -2 0 2 0.68
 -18 3 0 12.44 0.97
 -18 3 0 10.79 0.85
 -18 -3 0 11.65 1.11
 -18 -4 0 7.74 1.03
 -18 4 0 6.36 0.64
 -18 5 0 5.51 0.65
 -18 5 0 4.13 0.63
 -18 -5 0 6.43 1.01
 18 6 0 1.13 0.64
 18 6 0 0.18 0.81
 -18 -6 0 1.48 1.02
 -18 -6 0 2.58 0.99
 -18 -6 0 0.76 0.7
 -18 -7 0 8.44 0.8
 -18 7 0 6.57 0.69
 -18 -7 0 6.87 1.19
 18 7 0 8.49 0.77
 -18 -7 0 8.77 1.13
 18 7 0 6.2 0.96
 18 8 0 -0.19 0.93
 -18 8 0 1.74 0.63
 -18 -8 0 1.45 1.11
 18 8 0 2.12 0.86
 -18 -8 0 1.34 0.73
 -18 -8 0 2.49 1.21
 18 9 0 2.64 0.95
 -18 -9 0 -0.04 1.09
 -18 -9 0 2.54 1.25
 18 9 0 1.89 0.88
 -18 9 0 1.9 0.83
 -18 -9 0 4.18 0.97
 -19 0 0 0.43 0.79
 -19 1 0 -0.56 0.58
 -19 -1 0 -0.06 0.62
 -19 1 0 0.64 0.71
 -19 -1 0 1.61 0.76
 -19 -2 0 0.16 0.67
 -19 -2 0 0.36 0.82
 -19 -3 0 0.11 0.86
 -19 4 0 -0.49 0.56
 -19 -4 0 -0.29 0.96
 -19 -4 0 1.53 0.83
 -19 -5 0 1.25 1.04
 -19 -5 0 0.87 1.5
 19 6 0 -0.38 0.84
 -19 -6 0 -1.96 0.94
 -19 -6 0 -1.03 0.99
 -19 -7 0 -0.57 0.71
 -19 7 0 0.67 0.6
 19 7 0 -0.11 0.93
 -19 -7 0 0.69 1.13
 -19 -7 0 1.65 1.01
 -19 -7 0 1.8 0.63
 -19 -8 0 0.32 0.83
 19 8 0 -0.82 0.77
 -20 0 0 -0.27 0.79
 -20 0 0 -0.87 0.67
 -20 1 0 10.66 0.85
 -20 -1 0 12.13 1.08
 -20 1 0 12.37 1
 -20 -2 0 2.8 0.92
 -20 -2 0 2.33 0.7
 -20 -3 0 2.9 0.99
 -20 -4 0 -1.36 0.99
 -20 4 0 -0.47 0.63
 -20 5 0 0.72 0.63
 -20 5 0 0.23 0.67
 -20 -5 0 1.46 1.15
 -20 -5 0 1.73 0.97
 -20 6 0 0.24 0.66
 -20 -6 0 0.13 1.11
 -20 -6 0 2.31 1.03
 -21 0 0 0.11 0.88
 -21 -1 0 0.71 0.92
 -21 -1 0 -0.56 0.73
 -21 1 0 -0.77 0.67
 -21 1 0 -0.8 0.84
 -21 2 0 -0.08 0.8
 -21 -3 0 0.41 0.87
 -21 -3 0 0.81 1.03
 0 -2 1 6.6 0.4
 0 2 1 5.61 0.45
 0 -2 1 5.51 0.37
 0 -2 -1 6.66 0.39
 0 2 -1 6.46 0.49
 0 2 1 5.88 0.38
 0 2 1 5.32 0.36
 0 -2 -1 6.33 0.46
 0 2 -1 6.4 0.53
 0 2 -1 6.39 0.5
 0 -2 1 6.17 0.39
 0 3 -1 0.56 0.4
 0 3 1 -0.33 0.45
 0 -3 1 -0.45 0.45
 0 3 -1 -0.02 0.46
 0 -3 1 -0.14 0.47
 0 -3 -1 0.21 0.4
 0 3 -1 -0.77 0.44
 0 3 1 -0.17 0.38
 0 3 1 -0.68 0.46
 0 -3 -1 -0.19 0.47
 0 -3 1 -0.23 0.29
 0 -3 -1 -0.5 0.44
 0 -4 -1 492.1 11.91
 0 -4 1 489.51 11.92
 0 -4 -1 497.34 11.92
 0 4 1 479.03 11.91
 0 4 -1 496.26 11.92
 0 -4 1 490.97 11.92
 0 4 1 484.35 11.91
 0 4 -1 495.1 11.92
 0 4 1 499.05 11.91
 0 4 -1 497.6 11.92
 0 -4 -1 482.86 11.92
 0 5 -1 0.3 0.53
 0 -5 1 -0.24 0.46
 0 -5 -1 0.39 0.5
 0 5 1 0.01 0.44
 0 5 -1 0.12 0.47
 0 -5 1 0.39 0.52
 0 5 -1 -0.19 0.46
 0 5 1 0.05 0.5
 0 -5 -1 0.83 0.42
 0 5 1 -0.2 0.46
 0 -5 -1 -0.27 0.46
 0 -6 1 6.57 0.6
 0 6 -1 5.73 0.64
 0 6 1 6.12 0.55
 0 6 1 5.69 0.62
 0 -6 1 5.54 0.65
 0 -6 -1 6 0.56
 0 -6 -1 7.43 0.66
 0 6 -1 5.1 0.64
 0 -6 -1 5.8 0.63
 0 6 1 6.78 0.63
 0 -7 -1 -0.08 0.54
 0 7 -1 -1.24 0.59
 0 -7 1 -0.59 0.64
 0 7 1 1.01 0.54
 0 -7 -1 -0.33 0.58
 0 7 1 0.67 0.6
 0 -7 1 -0.67 0.59
 0 7 -1 0.16 0.58
 0 7 -1 0.4 0.53
 0 7 1 -0.2 0.59
 0 -7 -1 -0.23 0.58
 0 8 -1 243.69 6.11
 0 -8 -1 245.72 6.12
 0 8 1 245.39 6.12
 0 -8 1 242.18 6.12
 0 -8 1 244.33 6.01
 0 -8 -1 237 6.11
 0 8 1 232.86 6.1
 0 8 -1 239.8 6.1
 0 8 1 251.12 6.12
 0 -8 1 243.28 6.12
 0 8 -1 244.44 6.11
 0 -8 -1 240.3 6.1
 0 9 1 0.35 0.65
 0 9 1 -0.48 0.57
 0 9 -1 0.74 0.63
 0 9 -1 0.45 0.69
 0 -9 -1 0.32 0.62
 0 -9 -1 0.02 0.67
 0 -9 1 -0.31 0.43
 0 9 1 0.83 0.7
 0 9 -1 0.05 0.69
 0 -9 1 -0.61 0.69
 0 -9 1 0.04 0.66
 0 -10 1 3.98 0.53
 0 -10 1 5.3 0.87
 0 10 1 5.93 0.82
 0 10 -1 5.5 0.76
 0 10 -1 5.71 0.8
 0 -10 -1 5.36 0.82
 0 10 -1 5.41 0.84
 0 10 1 4.15 0.74
 0 10 1 5.88 0.86
 0 -10 1 4.8 0.84
 0 -10 -1 4.57 0.8
 0 11 -1 -0.15 0.8
 0 11 1 0.43 0.85
 0 11 1 0.45 0.84
 0 11 -1 0.28 0.71
 0 11 1 -0.7 0.67
 0 -11 -1 -0.98 0.79
 0 -11 1 -0.8 0.83
 0 11 -1 -0.86 0.78
 0 -11 -1 0.76 0.85
 0 -11 1 0.69 0.83
 0 -11 1 0.48 0.51
 0 12 1 3.81 0.84
 0 -12 1 3.44 0.92
 0 12 -1 3.2 1.18
 0 -12 1 4.59 1.05
 0 12 -1 2.46 0.94
 0 12 1 2.17 0.92
 0 -12 -1 4 1.02
 0 12 1 4.58 0.97
 0 12 -1 4.27 0.98
 0 -12 -1 3.86 0.94
 0 -12 1 2.93 0.61
 0 13 -1 -1 0.93
 0 -13 -1 -0.2 0.98
 0 13 1 -1.38 0.98
 0 -13 1 -2.14 1
 0 13 1 -0.14 0.86
 0 13 -1 3.05 1.57
 0 13 1 1.53 1.87
 0 -13 1 -0.75 0.56
 0 13 -1 -0.54 0.82
 0 -13 -1 -0.1 1.03
 0 -13 -1 -0.7 0.61
 0 -13 1 0.3 1.02
 0 -14 -1 0.24 1.12
 0 -14 1 -0.13 1.07
 0 -14 1 0.85 0.66
 0 14 -1 3.05 1.07
 0 14 -1 -0.39 0.95
 0 14 1 0.87 0.96
 0 -14 -1 1.53 0.69
 0 14 1 2.7 1.09
 0 -14 -1 2.53 1.16
 0 -14 1 2.01 1.06
 0 14 -1 0.59 1.12
 0 -15 -1 -1.08 0.72
 0 -15 1 -0.18 1.06
 0 15 1 -1.26 1.17
 0 -15 1 0.16 0.68
 0 15 1 1.5 1.23
 0 15 -1 0.56 0.93
 0 15 -1 -1.67 1.13
 0 -15 -1 -0.71 1.06
 0 -15 1 -0.2 1.21
 0 16 -1 8.18 1.24
 0 -16 1 8.73 0.88
 0 16 1 8.75 1.3
 0 16 1 12.65 1.44
 0 -16 -1 9.75 0.9
 0 16 -1 11.58 1.46
 0 16 1 11.68 1.47
 0 -16 1 11.5 1.47
 0 -16 1 9.64 1.27
 0 -16 -1 12.35 1.48
 0 -17 -1 1.12 0.82
 0 -17 1 -0.11 1.47
 0 17 1 1.43 1.33
 0 -17 -1 3.32 1.42
 0 17 1 -1.71 1.32
 0 17 -1 -0.76 1.16
 0 17 -1 0.66 1.35
 0 -17 1 1.94 0.79
 0 17 1 3.4 1.3
 0 17 -1 0.37 1.44
 1 -2 -1 189.41 4.58
 1 -2 -1 176.44 4.56
 -1 -2 1 186.95 4.57
 1 -2 -1 191.11 4.58
 -1 -2 1 187.72 4.58
 -1 -2 1 188.86 4.58
 1 2 1 188.19 4.58
 -1 2 -1 181.23 4.57
 1 2 1 187.28 4.58
 1 2 1 194.75 4.58
 -1 -2 1 187.89 4.58
 -1 2 1 177.23 4.56
 1 -2 1 183.88 4.57
 1 -2 1 187.37 4.57
 -1 -2 -1 181.89 4.58
 1 2 -1 192.47 4.59
 -1 2 1 191.54 4.58
 1 2 -1 193.1 4.58
 -1 -2 -1 191.76 4.58
 -1 2 1 187.02 4.58
 -1 -2 -1 191.43 4.58
 1 2 -1 186.67 4.58
 1 3 1 21.08 0.93
 1 -3 -1 20.67 0.93
 1 3 1 19.12 0.87
 1 3 1 20.66 0.92
 -1 -3 1 18.63 0.84
 -1 -3 1 18.87 0.92
 1 -3 -1 21.63 0.9
 -1 3 -1 19.17 0.89
 1 -3 -1 21.77 0.86
 -1 -3 1 20.48 0.9
 -1 3 -1 18.62 0.9
 -1 3 1 20.98 0.89
 1 -3 1 20.08 0.92
 -1 -3 -1 20.22 0.89
 -1 -3 -1 19.81 0.93
 -1 3 1 20.02 0.92
 1 3 -1 19.74 0.92
 -1 3 1 20.2 0.84
 -1 -3 -1 19.83 0.92
 1 -3 1 19.78 0.9
 1 3 -1 20.56 0.88
 1 4 1 37.83 1.25
 -1 -4 1 40.34 1.24
 -1 4 -1 37.18 1.24
 1 -4 -1 37.46 1.26
 1 -4 -1 38.9 1.26
 1 4 1 36.7 1.26
 1 -4 -1 37.71 1.21
 -1 -4 1 37.27 1.26
 1 4 1 39.9 1.23
 -1 4 -1 38.84 1.25
 -1 -4 1 39.66 1.19
 -1 4 -1 38.69 1.23
 -1 -4 1 38.04 1.28
 -1 4 1 35.66 1.26
 -1 4 1 39.6 1.21
 1 -4 1 37.64 1.26
 -1 -4 -1 40.27 1.27
 -1 -4 -1 39.03 1.23
 1 -4 1 36.26 1.24
 1 4 -1 37.4 1.27
 1 4 -1 37.9 1.26
 -1 -4 -1 36.92 1.27
 -1 4 1 38.69 1.25
 1 4 -1 40.02 1.24
 1 5 1 4.29 0.49
 -1 5 -1 3.78 0.46
 -1 -5 1 4.9 0.57
 -1 -5 1 4.02 0.5
 -1 5 -1 4.17 0.52
 -1 5 -1 4.83 0.54
 1 5 1 5.48 0.6
 1 5 1 4.27 0.53
 1 -5 -1 4.25 0.49
 1 -5 -1 5.22 0.56
 1 -5 -1 4.78 0.56
 -1 -5 -1 4.23 0.51
 -1 5 1 4.96 0.58
 -1 5 1 4.61 0.49
 1 -5 1 4.52 0.55
 1 5 -1 4.45 0.58
 1 5 -1 4.88 0.6
 -1 -5 -1 3.73 0.55
 1 -5 1 3.78 0.53
 1 5 -1 4.79 0.47
 -1 5 1 4.61 0.57
 -1 -6 1 11.76 0.93
 1 6 1 10.86 0.97
 1 -6 -1 10.86 0.91
 1 -6 -1 12.41 0.98
 -1 -6 1 11.69 0.97
 -1 6 -1 11.79 0.97
 1 6 1 11.89 0.98
 1 6 1 11.48 0.9
 -1 -6 1 9.68 0.78
 1 -6 -1 10.91 0.97
 -1 6 -1 10.76 0.9
 1 -6 1 11.76 1
 -1 -6 -1 12 0.89
 -1 6 1 10.67 0.96
 -1 -6 -1 9.38 0.74
 1 6 -1 10.28 0.91
 1 6 -1 11.89 0.98
 -1 -7 1 1.81 0.58
 -1 -7 1 1.58 0.61
 1 7 1 2.48 0.57
 1 -7 -1 1.89 0.61
 -1 -7 1 1.5 0.44
 1 7 1 0.66 0.66
 1 -7 -1 1.66 0.59
 -1 7 -1 1.39 0.57
 -1 -7 1 2.99 0.66
 -1 7 -1 1.9 0.56
 -1 7 -1 1.35 0.59
 1 -7 -1 2.06 0.54
 1 7 1 1.97 0.64
 -1 7 1 1.17 0.54
 1 7 -1 1.69 0.6
 1 7 -1 1.28 0.56
 1 7 -1 1.78 0.64
 -1 -7 -1 1.29 0.61
 1 -7 1 1.49 0.6
 -1 7 1 2.12 0.63
 -1 -7 -1 1.12 0.54
 -1 -7 -1 0.96 0.63
 -1 7 1 2.22 0.67
 1 -8 -1 15.52 1.12
 -1 -8 1 14.86 1.18
 1 -8 -1 13.35 1.11
 1 8 1 15.52 1.06
 -1 8 -1 14.12 1.08
 -1 8 -1 15.56 1.16
 -1 -8 1 14.02 1.13
 1 8 1 14.25 1.15
 -1 8 -1 13.37 1.11
 1 8 1 14.19 1.12
 -1 -8 1 14.03 0.95
 1 -8 1 14.46 1.11
 -1 8 1 14.49 1.14
 1 -8 1 15.7 1.15
 1 -8 1 14.47 0.84
 1 8 -1 14.23 1.11
 -1 -8 -1 16.23 1.14
 -1 8 1 15.63 1.05
 -1 8 1 13.92 1.14
 1 8 -1 16.03 1.17
 -1 -8 -1 15.08 1.1
 1 9 1 1.09 0.71
 -1 -9 1 2.33 0.72
 -1 -9 1 2.25 0.68
 -1 9 -1 1.25 0.59
 1 -9 -1 2.16 0.73
 -1 -9 1 2.05 0.48
 1 9 1 2.22 0.64
 -1 9 -1 2.64 0.72
 1 9 1 3.09 0.69
 -1 9 -1 3.15 0.74
 -1 -9 -1 1.23 0.65
 -1 9 1 2.54 0.72
 1 9 -1 2.35 0.71
 1 -9 1 2.14 0.45
 1 9 -1 2.12 0.7
 -1 9 1 3.07 0.63
 1 9 -1 3.26 0.67
 -1 9 1 1.7 0.7
 -1 -9 -1 1.18 0.69
 1 -9 1 2.02 0.71
 -1 -10 1 5.54 0.83
 -1 -10 1 5.7 0.83
 1 10 1 5.8 0.74
 -1 10 -1 4.5 0.78
 -1 10 -1 5.32 0.76
 1 -10 -1 6.73 0.87
 1 10 1 6.63 0.91
 1 10 1 6.02 0.82
 -1 10 -1 5.56 0.82
 -1 -10 1 4.63 0.56
 1 10 -1 5.7 0.83
 -1 -10 -1 6.24 0.82
 -1 10 1 5.31 0.82
 1 -10 1 6.76 0.86
 -1 -10 -1 6.15 0.77
 1 -10 1 4.48 0.5
 1 10 -1 6.63 0.89
 1 10 -1 5.67 0.76
 1 -10 1 5.32 0.82
 -1 10 1 5.65 0.82
 -1 10 1 4.88 0.72
 -1 -10 -1 5.81 0.83
 1 11 1 0.07 0.72
 -1 -11 1 -1.04 0.83
 1 -11 -1 1.26 0.82
 -1 -11 1 0.69 0.9
 -1 11 -1 0.41 0.85
 1 -11 -1 -0.7 0.82
 1 11 1 -0.57 0.83
 -1 11 -1 0.45 0.74
 -1 11 -1 0.42 0.8
 -1 -11 1 0.13 0.55
 1 11 1 0.53 0.77
 1 11 -1 -0.49 0.75
 1 -11 1 0.08 0.49
 -1 11 1 0.6 0.81
 1 -11 1 -0.73 0.84
 -1 11 1 0.02 0.79
 -1 -11 -1 -1.02 0.82
 -1 -11 -1 0.68 0.84
 1 -11 1 -0.83 0.83
 1 11 -1 -1.22 0.8
 -1 11 1 -0.47 0.7
 1 11 -1 -1.02 0.82
 -1 12 -1 0.59 0.87
 1 12 1 2.05 0.96
 -1 -12 1 0.84 0.62
 -1 12 -1 2.25 0.9
 -1 12 -1 1.51 0.94
 -1 -12 1 -0.44 0.92
 1 12 1 -0.6 1.38
 -1 -12 1 0.43 0.9
 1 -12 -1 1.49 0.93
 1 12 1 1.27 0.93
 1 12 -1 -0.57 1.2
 -1 12 1 -0.16 0.76
 1 12 -1 1.8 0.91
 -1 -12 -1 0.91 0.59
 1 12 -1 2.26 0.9
 -1 -12 -1 1.12 0.94
 -1 -12 -1 2.09 0.97
 1 -12 1 2.05 0.55
 1 -12 1 3.26 1.53
 1 -12 1 0.73 0.91
 -1 12 1 2.29 0.93
 -1 13 -1 1.1 1.02
 1 -13 -1 -0.81 1
 1 -13 -1 -0.11 0.59
 1 13 1 0.71 1.04
 -1 -13 1 -1.39 1.05
 -1 -13 1 1.99 1.01
 1 -13 -1 0.23 0.96
 -1 -13 1 0.86 0.62
 1 13 1 -0.96 0.82
 1 13 1 2.24 0.99
 -1 13 -1 -0.3 0.88
 -1 -13 -1 0.85 0.96
 -1 -13 -1 0.95 1.19
 1 -13 1 0.28 1
 1 13 -1 1.47 0.83
 1 13 -1 1.06 1.06
 1 -13 1 1.02 0.96
 -1 -13 -1 -0.35 0.65
 -1 13 1 0.27 1.03
 1 13 -1 2.07 0.99
 1 -13 1 0.21 0.57
 -1 13 1 1.85 1.02
 -1 13 1 0.06 0.78
 1 14 1 4.26 1.19
 1 14 1 5.37 1.14
 -1 14 -1 3.58 1.16
 1 -14 -1 2.67 0.68
 -1 -14 1 4.35 1.16
 -1 14 -1 3.16 1
 -1 14 -1 4.48 1.12
 1 -14 -1 3.09 1.16
 -1 -14 1 4.48 0.74
 1 -14 -1 5.07 1.15
 -1 -14 1 1.61 1.03
 1 14 1 2.29 1
 -1 -14 -1 3.14 1.08
 1 14 -1 3.26 1.11
 -1 -14 -1 2.51 0.73
 1 -14 1 2.9 0.66
 -1 14 1 4.72 1.17
 1 -14 1 1.78 1.15
 -1 14 1 4.87 1.19
 -1 14 1 3.08 0.93
 1 -14 1 3.88 1.35
 1 15 1 0.34 1.22
 1 -15 -1 0.39 0.72
 -1 15 -1 2.52 1.21
 1 15 1 -0.39 1.04
 -1 -15 1 0.91 1.1
 1 -15 -1 0.63 1.09
 -1 15 -1 -1.13 0.92
 1 15 1 0.89 1.12
 -1 -15 1 1.48 1.17
 -1 15 -1 1.05 1.09
 -1 15 1 -0.8 0.99
 1 15 -1 1.04 1.06
 1 15 -1 0.24 1.14
 -1 15 1 0.02 1.16
 -1 -15 -1 0.38 0.78
 1 15 -1 2.18 1.22
 1 -15 1 -0.32 0.65
 -1 15 1 -0.98 1.13
 -1 -15 -1 -0.14 1.11
 1 -15 1 -1.04 1.11
 -1 -15 -1 0.45 1.06
 1 -15 1 -1.01 1.25
 -1 -16 1 0.57 1.2
 1 -16 -1 -0.09 1.13
 -1 16 -1 2.24 1.32
 -1 -16 1 0.61 0.78
 -1 -16 1 -1.97 1.25
 1 16 1 0.66 1.17
 1 16 1 1.64 1.27
 1 -16 -1 -0.19 1.26
 -1 16 -1 0.58 1.19
 1 -16 1 1.19 1.27
 -1 16 1 0.71 1.25
 1 -16 1 -0.33 1.33
 -1 16 1 1.99 1.31
 -1 -16 -1 0.29 1.23
 1 16 -1 0.29 1.26
 -1 16 1 2.03 1.18
 1 16 -1 2.24 1.29
 -1 -16 -1 -0.08 1.22
 -1 -16 -1 0.29 0.73
 -1 17 -1 2.34 1.3
 -1 -17 1 2.61 1.3
 -1 -17 1 2.92 1.42
 1 -17 -1 0.09 1.29
 1 17 1 2.33 1.36
 -1 17 -1 1.77 1.42
 1 -17 -1 2.41 0.8
 1 17 1 4.11 1.38
 1 17 1 2.67 1.21
 1 -17 1 5.35 1.51
 -1 -17 -1 3.66 1.38
 -1 17 1 -0.16 1.32
 -1 -17 -1 4.35 1.34
 1 17 -1 4.83 1.54
 2 0 -1 -0.08 0.11
 -2 0 1 -0.19 0.1
 -2 0 1 -0.13 0.14
 -2 0 1 0.03 0.15
 2 0 -1 -0.22 0.15
 -2 0 -1 0.03 0.16
 2 0 -1 -0.07 0.18
 -2 0 1 0.12 0.17
 -2 -1 1 41.08 1.04
 -2 -1 1 37.07 1.08
 -2 -1 1 41.27 1.04
 -2 -1 -1 36.52 1.02
 2 2 1 539.32 13.03
 2 2 1 535.94 13.02
 2 -2 -1 522.15 13.02
 -2 -2 1 551 13.02
 2 -2 -1 548.98 13.01
 2 2 1 528.26 13.02
 -2 2 -1 526.55 13
 2 -2 -1 528.49 13.01
 -2 -2 1 559.5 13.04
 -2 -2 1 543.14 13.02
 -2 -2 1 541.45 13.02
 -2 2 -1 536.17 13.01
 -2 2 1 535.89 13
 2 -2 1 561.11 13.01
 2 2 -1 530.92 13.03
 -2 2 1 535.52 13.01
 2 2 -1 531.67 13.02
 -2 -2 -1 569.73 13.02
 2 2 -1 538.44 13.02
 2 2 -1 539.45 13.02
 -2 -2 -1 533.86 13.02
 -2 2 1 556.36 13.01
 -2 -2 -1 530.62 13.02
 2 -2 1 527.21 13.01
 -2 -3 1 1.87 0.52
 -2 -3 1 1.22 0.45
 -2 -3 1 1.09 0.4
 2 3 1 1.67 0.41
 2 3 1 1.91 0.48
 -2 3 -1 2.13 0.43
 -2 -3 1 0.79 0.44
 -2 3 -1 2.02 0.45
 2 -3 -1 1.64 0.47
 2 3 1 2.11 0.43
 2 -3 1 1.41 0.41
 -2 3 1 2.77 0.5
 -2 -3 -1 1.66 0.52
 -2 3 1 2 0.39
 -2 -3 -1 1.4 0.46
 -2 3 1 1.59 0.45
 -2 -3 -1 1.95 0.43
 2 -3 1 1.31 0.43
 2 3 -1 2.37 0.45
 -2 -4 1 115.65 3.03
 -2 4 -1 115.82 3.01
 2 -4 -1 121.19 3.02
 -2 4 -1 117.63 3.02
 -2 -4 1 120.04 3.03
 2 -4 -1 117.4 3.01
 2 4 1 117.19 3.04
 -2 -4 1 121.85 3.03
 2 4 1 117.39 3.03
 -2 -4 1 119.85 3.04
 2 4 1 117.36 3.03
 2 4 -1 117.59 3.03
 2 4 -1 119.3 3.04
 -2 -4 -1 123.24 3.03
 -2 4 1 115.48 2.99
 -2 -4 -1 116.78 3.02
 2 4 -1 117.25 3.02
 -2 4 1 118.62 3.02
 -2 4 1 115.7 3.02
 -2 -4 -1 116.22 3.03
 2 -4 1 118.73 3.02
 2 -4 1 116.64 3.02
 -2 5 -1 1.99 0.45
 -2 5 -1 1.47 0.5
 2 5 1 2.83 0.55
 2 -5 -1 1.68 0.48
 2 5 1 1.68 0.5
 -2 -5 1 2.6 0.52
 -2 5 -1 2.74 0.49
 2 5 1 1.73 0.47
 -2 -5 1 1.72 0.5
 2 -5 -1 2.28 0.52
 -2 -5 1 2.3 0.48
 2 5 -1 2.16 0.48
 -2 5 1 1.7 0.48
 -2 -5 -1 2.5 0.54
 -2 5 1 2.66 0.54
 2 -5 1 2.2 0.5
 -2 -5 -1 2.49 0.46
 2 5 -1 1.86 0.54
 -2 -5 -1 1.82 0.54
 2 -5 1 2.4 0.54
 -2 5 1 2.39 0.46
 2 5 -1 2.13 0.53
 -2 6 -1 59.02 1.76
 2 -6 -1 55.32 1.78
 -2 -6 1 60.77 1.79
 -2 6 -1 58.41 1.74
 2 -6 -1 60.27 1.8
 -2 -6 1 56.24 1.76
 -2 6 -1 55.25 1.74
 2 6 1 54.98 1.77
 2 6 -1 55.65 1.75
 -2 -6 -1 55.12 1.79
 -2 6 1 59.38 1.76
 2 6 -1 57.15 1.8
 -2 -6 -1 55.58 1.76
 -2 6 1 57.95 1.77
 -2 -6 -1 59.62 1.8
 2 -6 1 58.98 1.78
 -2 -7 1 228.79 5.61
 -2 -7 1 227.4 5.65
 2 -7 -1 223.3 5.64
 -2 7 -1 216.41 5.62
 2 7 1 228.81 5.64
 -2 7 -1 227.49 5.64
 -2 -7 1 226.26 5.65
 -2 -7 1 229.24 5.66
 2 7 1 219.98 5.64
 2 7 1 231.43 5.66
 -2 7 -1 227.28 5.64
 2 -7 -1 222.71 5.64
 -2 7 1 221.99 5.64
 -2 7 1 220.84 5.61
 2 -7 1 217.84 5.62
 2 7 -1 223.72 5.64
 2 7 -1 221.44 5.65
 -2 7 1 223.84 5.64
 -2 -7 -1 220.73 5.64
 -2 -7 -1 221.96 5.65
 2 7 -1 224.94 5.64
 2 -7 1 224.86 5.64
 2 8 1 35.08 1.43
 2 -8 -1 30.34 1.39
 2 8 1 33.12 1.36
 -2 8 -1 32.41 1.37
 -2 -8 1 32.05 1.44
 -2 8 -1 31.43 1.39
 2 8 1 35.38 1.45
 -2 -8 1 35.48 1.41
 -2 -8 1 33.19 1.41
 -2 -8 1 32.43 1.3
 2 -8 -1 33.01 1.42
 -2 8 -1 34.16 1.4
 2 -8 1 31.79 1.41
 -2 8 1 35.64 1.4
 2 8 -1 32.78 1.42
 -2 -8 -1 33.2 1.38
 -2 8 1 32.25 1.41
 -2 -8 -1 32.84 1.42
 -2 8 1 36 1.34
 2 -8 1 30.68 1.42
 2 8 -1 33.15 1.35
 2 8 -1 34.05 1.43
 2 9 1 51.97 1.86
 -2 -9 1 50.7 1.71
 -2 -9 1 53.55 1.83
 2 -9 -1 53.5 1.84
 -2 -9 1 53.53 1.86
 -2 -9 1 53.39 1.9
 2 9 1 56.2 1.82
 -2 9 -1 52.58 1.84
 -2 9 -1 53.43 1.79
 -2 9 -1 55.37 1.85
 2 9 1 55.15 1.88
 -2 9 1 54.53 1.8
 2 -9 1 52.76 1.85
 -2 9 1 54.3 1.88
 -2 -9 -1 54.36 1.87
 2 -9 1 51.62 1.58
 -2 -9 -1 56.28 1.88
 2 9 -1 51.53 1.85
 2 9 -1 55.32 1.9
 2 -9 1 53.25 1.84
 -2 9 1 53.25 1.84
 -2 -9 -1 56.6 1.82
 2 9 -1 54.9 1.82
 -2 -10 1 55.09 1.98
 2 10 1 56.28 1.97
 -2 10 -1 56.04 1.92
 2 10 1 53.9 1.97
 -2 10 -1 55.54 1.88
 -2 -10 1 53.52 1.96
 -2 -10 1 52.25 1.79
 -2 10 -1 55.1 1.97
 2 10 1 53.13 1.89
 2 -10 -1 55.12 1.97
 2 10 -1 57.76 1.93
 -2 -10 -1 51.37 1.95
 2 -10 1 53.78 1.95
 2 -10 1 53.76 1.95
 -2 -10 -1 52.54 1.93
 2 -10 1 51.28 1.62
 -2 10 1 55.3 1.9
 2 10 -1 52.24 1.97
 -2 10 1 57.12 1.98
 -2 -10 -1 54.99 1.96
 -2 10 1 55.85 1.93
 2 10 -1 53.38 1.94
 -2 11 -1 -0.45 0.77
 -2 11 -1 2.46 0.77
 2 11 1 1.55 0.91
 -2 -11 1 1.97 0.85
 2 -11 -1 -0.52 0.84
 2 11 1 -0.06 0.72
 -2 11 -1 -0.06 0.81
 2 11 1 1.2 0.88
 -2 -11 1 -0.73 0.83
 2 -11 -1 2.24 0.85
 -2 -11 1 -0.34 0.59
 -2 11 1 0.32 0.72
 -2 -11 -1 1.53 0.87
 -2 -11 -1 1.87 0.8
 2 11 -1 1.4 0.84
 -2 11 1 1 0.89
 -2 11 1 1.85 0.81
 2 -11 1 0.32 0.49
 2 -11 1 0.79 0.83
 2 11 -1 1.96 0.78
 2 -11 1 1.04 0.88
 2 11 -1 0.46 0.84
 -2 -11 -1 0.35 0.86
 2 12 1 -0.81 0.9
 2 -12 -1 1.3 0.99
 -2 12 -1 1.42 0.83
 2 12 1 0.05 0.94
 -2 12 -1 -0.79 0.86
 -2 -12 1 1.44 0.94
 2 -12 -1 0.32 0.89
 2 12 1 0.42 0.89
 -2 -12 1 0.79 0.64
 -2 -12 1 0.49 0.96
 -2 12 1 1.02 0.82
 -2 -12 -1 -0.37 0.94
 2 -12 1 0.37 0.95
 -2 -12 -1 2.12 0.91
 2 -12 1 0.79 0.5
 2 12 -1 0.64 0.75
 2 12 -1 1.42 0.92
 -2 -12 -1 0.21 0.63
 -2 12 1 1.65 0.92
 -2 12 1 1.41 0.86
 2 -12 1 0.94 0.91
 2 12 -1 0.92 0.88
 -2 13 -1 9.23 1.14
 -2 13 -1 9.22 0.98
 2 -13 -1 8.58 0.71
 2 13 1 10.79 1.95
 2 -13 -1 8.27 1.14
 -2 -13 1 11 1.17
 -2 -13 1 9.84 0.81
 2 -13 -1 12.47 1.13
 -2 -13 1 10.58 1.33
 -2 -13 -1 10.81 1.16
 2 13 -1 9.81 1.63
 2 -13 1 10.95 1.15
 -2 13 1 12.06 1.16
 2 -13 1 10.28 1.2
 -2 -13 -1 10.26 1.22
 -2 13 1 12.15 1.16
 -2 -13 -1 8.74 0.83
 2 13 -1 10 1.09
 -2 13 1 8.56 0.98
 2 13 -1 10.7 0.98
 2 -14 -1 11.99 0.83
 2 14 1 12.67 1.22
 -2 -14 1 16.6 1.38
 2 14 1 14.14 1.38
 2 -14 -1 12.19 1.32
 -2 14 -1 15.76 1.32
 -2 -14 1 16.68 1.36
 2 14 1 16.26 1.37
 -2 -14 -1 16.11 1.3
 -2 14 1 14.4 1.16
 2 14 -1 11.8 1.17
 2 14 -1 14.92 1.33
 -2 14 1 15.1 1.31
 2 -14 1 14.49 1.19
 2 -14 1 14.7 1.34
 -2 -14 -1 14.36 1.33
 -2 15 -1 7.76 1.12
 -2 -15 1 9.85 1.33
 -2 15 -1 11.76 1.29
 2 -15 -1 9.15 0.77
 -2 -15 1 8.25 0.9
 -2 -15 1 8.7 1.23
 2 15 1 11.13 1.42
 -2 15 -1 9.54 1.29
 2 15 1 10.61 1.29
 2 -15 -1 10.34 1.2
 2 -15 1 9.43 1.25
 -2 -15 -1 7.15 0.95
 2 -15 1 8.83 1.21
 2 15 -1 11.03 1.35
 2 15 -1 11.3 1.26
 -2 -15 -1 8.06 1.28
 -2 15 1 10.65 1.2
 2 -15 1 8.58 0.74
 -2 -15 -1 10.3 1.31
 -2 15 1 8.8 1.36
 -2 15 1 8.32 1.31
 -2 -16 1 -0.36 1.34
 -2 16 -1 -0.48 1.24
 -2 16 -1 -1.67 1
 2 -16 -1 0.23 0.69
 2 -16 -1 -1.3 1.19
 2 16 1 1.67 1.19
 -2 16 -1 -0.02 1.24
 -2 -16 1 0.57 1.33
 -2 -16 1 2.35 1.23
 -2 16 1 1.88 1.22
 2 -16 1 -0.07 1.32
 -2 16 1 -0.53 1.18
 2 16 -1 -1.2 1.14
 2 16 -1 2.71 1.33
 2 16 -1 0.95 1.15
 2 -16 1 0.19 1.14
 -2 -16 -1 -0.29 1.29
 -2 17 -1 4.33 1.38
 2 17 1 4.64 1.45
 2 -17 -1 1.56 1.28
 -2 17 -1 5.1 1.52
 -2 17 -1 3.5 1.21
 -2 -17 1 1.37 1.47
 2 -17 -1 4.32 1.47
 -2 -17 1 4.65 0.94
 -2 17 1 3.84 1.41
 2 -17 1 3.66 0.74
 2 17 -1 1.64 1.48
 -2 17 1 5.86 1.41
 -2 -17 -1 2.83 0.96
 2 17 -1 3.23 1.28
 2 -17 1 5.04 1.49
 2 -17 1 5.62 1.43
 -2 -17 -1 5.04 1.48
 -2 -17 -1 4.57 1.33
 -2 17 1 2.18 1.3
 2 17 -1 3.96 1.39
 3 0 -1 -0.23 0.27
 -3 0 1 0.24 0.25
 -3 0 1 0.3 0.2
 -3 0 1 -0.55 0.21
 3 0 -1 -0.27 0.18
 3 0 -1 0.29 0.22
 -3 0 1 -0.46 0.18
 -3 0 -1 0.02 0.24
 -3 -1 1 246.88 5.92
 3 1 1 244.17 5.94
 -3 -1 1 250.95 5.97
 3 -1 -1 239.67 5.91
 3 -1 -1 244.16 5.93
 3 1 1 245.31 5.91
 -3 1 -1 245.85 5.91
 -3 -1 1 237.57 5.92
 -3 -1 1 241.59 5.92
 3 1 -1 243.78 5.92
 3 1 -1 244.18 5.92
 -3 -1 -1 243.04 5.91
 -3 1 1 239.2 5.91
 -3 1 1 240.72 5.91
 -3 1 1 241.35 5.92
 3 1 -1 255.83 5.97
 3 1 -1 237.11 5.93
 -3 -1 -1 244.74 5.94
 -3 -1 -1 255.28 5.91
 3 -2 -1 588.48 14.31
 3 2 1 603.7 14.33
 -3 -2 1 586.97 14.34
 -3 2 -1 591.04 14.32
 -3 -2 1 629.57 14.37
 3 2 1 582.93 14.33
 3 2 1 600.68 14.35
 -3 2 -1 580.15 14.31
 -3 -2 1 591.92 14.34
 -3 -2 1 596.59 14.34
 3 -2 -1 596 14.32
 3 -2 -1 610.24 14.32
 3 -2 1 567.7 14.34
 3 2 -1 593.22 14.34
 -3 2 1 604.36 14.32
 3 2 -1 592.2 14.34
 -3 -2 -1 571.37 14.33
 -3 2 1 587.89 14.32
 -3 -2 -1 609.31 14.33
 3 -2 1 583.83 14.32
 3 2 -1 601.29 14.34
 -3 2 1 594.41 14.32
 -3 -2 -1 596.03 14.35
 3 2 -1 602.48 14.37
 3 3 1 28.22 0.99
 3 3 1 27.88 0.99
 -3 3 -1 27.83 0.97
 3 -3 -1 27.33 0.81
 -3 -3 1 27.31 1.01
 3 -3 -1 28.55 0.97
 3 -3 -1 28 0.96
 3 3 1 27.7 0.99
 -3 -3 1 29.23 1.05
 -3 3 -1 28.43 0.96
 -3 -3 1 26.26 1
 -3 -3 1 27.02 1.01
 3 -3 1 26.82 0.94
 3 -3 1 26.27 0.96
 3 3 -1 28.43 1
 -3 -3 -1 29.48 1.01
 3 3 -1 28.44 0.98
 -3 3 1 28.79 0.99
 -3 -3 -1 27.85 1.02
 -3 3 1 28.54 0.92
 -3 3 1 26.75 0.98
 -3 -3 -1 26.84 1
 -3 -4 1 5.8 0.51
 3 -4 -1 5.88 0.54
 3 4 1 5.34 0.45
 3 -4 -1 6.75 0.55
 3 4 1 6.17 0.53
 3 -4 -1 5.95 0.46
 -3 -4 1 5.55 0.53
 -3 4 -1 6.59 0.53
 -3 -4 1 6.23 0.53
 -3 4 -1 6.11 0.51
 -3 -4 1 5.07 0.46
 3 4 1 6.96 0.56
 -3 4 1 5.75 0.5
 -3 -4 -1 5.91 0.58
 3 4 -1 6.22 0.52
 -3 -4 -1 5.89 0.52
 3 -4 1 6.06 0.5
 3 -4 1 4.91 0.49
 -3 4 1 5.79 0.45
 -3 -4 -1 5.54 0.49
 3 4 -1 6.47 0.56
 -3 -5 1 25.4 1.05
 3 -5 -1 23.97 1.03
 -3 5 -1 23.21 1.05
 3 5 1 25.93 1.07
 -3 -5 1 26.43 1.07
 3 -5 -1 23.72 1.05
 -3 5 -1 24.3 1.03
 -3 -5 1 24.45 1.07
 -3 -5 1 23.71 1.08
 3 5 1 25.29 1.08
 3 5 1 23.3 1.09
 3 5 -1 25 1.08
 -3 -5 -1 24.44 1.07
 -3 5 1 25.45 0.97
 3 -5 1 23.72 1.05
 -3 -5 -1 23.65 1.08
 3 5 -1 24.92 1.09
 -3 -5 -1 25.34 1.08
 3 -5 1 23.99 1.05
 -3 5 1 24.47 1.05
 -3 5 1 25.71 1.05
 3 5 -1 25.25 1.05
 3 -6 -1 23.65 1.15
 3 6 1 24.94 1.17
 3 6 1 25.61 1.17
 3 -6 -1 23.4 1.13
 3 6 1 22.01 1.11
 -3 6 -1 24.11 1.13
 -3 -6 1 26.01 1.15
 -3 6 -1 24.54 1.1
 3 -6 1 25.33 1.14
 3 -6 1 24.85 1.13
 -3 -6 -1 23.6 1.12
 -3 6 1 23.23 1.07
 3 6 -1 23.49 1.19
 -3 -6 -1 25.71 1.16
 -3 6 1 25.52 1.11
 -3 6 1 23.55 1.12
 3 6 -1 24.57 1.11
 3 -7 -1 0.77 0.62
 -3 -7 1 1.26 0.65
 3 7 1 0.57 0.53
 -3 7 -1 1.98 0.54
 3 7 1 2.17 0.67
 -3 -7 1 1.98 0.58
 -3 7 -1 1.95 0.64
 3 7 1 1.13 0.65
 3 -7 -1 1.08 0.58
 -3 -7 1 1.25 0.58
 -3 7 -1 1.76 0.6
 3 7 -1 1.02 0.57
 -3 7 1 1.76 0.59
 -3 -7 -1 1.22 0.57
 3 -7 1 1.39 0.58
 3 7 -1 1.13 0.65
 -3 7 1 1.88 0.65
 -3 7 1 2.32 0.55
 3 -7 1 1.74 0.62
 -3 -7 -1 1.57 0.62
 3 7 -1 1.25 0.61
 3 -8 -1 31.78 1.36
 3 8 1 31.71 1.35
 -3 -8 1 31.54 1.38
 3 8 1 33.06 1.4
 -3 8 -1 31.25 1.3
 -3 -8 1 32.47 1.32
 3 8 1 32.09 1.4
 -3 8 -1 29.74 1.33
 3 -8 -1 32.07 1.41
 -3 -8 1 31.5 1.43
 -3 -8 1 33.53 1.42
 -3 8 -1 34.11 1.4
 -3 8 1 32.02 1.38
 -3 -8 -1 33.06 1.41
 3 -8 1 30.8 1.38
 -3 -8 -1 30.81 1.41
 -3 8 1 30.05 1.36
 -3 -8 -1 33.83 1.36
 -3 8 1 33.34 1.32
 3 8 -1 34.13 1.35
 3 8 -1 35.26 1.42
 -3 -9 1 -0.01 0.5
 -3 9 -1 0.43 0.66
 -3 9 -1 0.52 0.68
 3 -9 -1 -0.21 0.66
 -3 9 -1 -0.19 0.59
 3 9 1 0.1 0.63
 3 9 1 -0.58 0.69
 -3 -9 1 0.17 0.65
 -3 -9 1 -0.9 0.67
 -3 -9 1 1.38 0.74
 3 9 1 -0.67 0.71
 -3 9 1 -0.76 0.67
 3 9 -1 0.75 0.68
 3 -9 1 -0.41 0.67
 3 9 -1 1.51 0.75
 -3 9 1 -0.65 0.58
 3 9 -1 0.55 0.62
 3 -9 1 0.94 0.69
 -3 -9 -1 0.02 0.57
 -3 -9 -1 0.62 0.69
 3 -9 1 0.16 0.35
 -3 -9 -1 0.64 0.69
 -3 10 -1 6.59 0.86
 -3 -10 1 5.52 0.81
 -3 -10 1 5.7 0.78
 3 -10 -1 5.39 0.92
 -3 -10 1 5.02 0.83
 3 10 1 4.69 0.82
 -3 10 -1 5 0.81
 3 10 1 3.61 0.77
 -3 10 -1 4.16 0.75
 -3 -10 1 5.07 0.63
 -3 10 1 6.03 0.85
 3 -10 1 4.27 0.81
 -3 10 1 4.85 0.81
 -3 10 1 4.61 0.7
 3 10 -1 4.74 0.71
 3 10 -1 6.18 0.88
 3 10 -1 4.7 0.85
 3 -10 1 4.49 0.44
 3 -10 1 5.57 0.84
 -3 -10 -1 5.61 0.84
 -3 -10 -1 4.61 0.73
 -3 -10 -1 5.95 0.88
 3 -11 -1 0.47 0.85
 -3 -11 1 1.35 0.83
 3 11 1 1.08 0.87
 3 -11 -1 0.81 0.83
 -3 11 -1 2.38 0.77
 -3 -11 1 1.17 0.62
 3 11 1 0.99 0.89
 -3 11 -1 1.35 0.84
 3 11 1 1.38 0.82
 -3 -11 1 0.98 0.87
 -3 11 -1 2.51 0.87
 -3 -11 -1 1.3 0.87
 -3 11 1 1.99 0.87
 -3 11 1 1.83 0.89
 3 -11 1 1.42 0.9
 -3 -11 -1 0.92 0.81
 3 -11 1 0.89 0.45
 3 11 -1 1.15 0.84
 -3 -11 -1 2.58 0.89
 -3 11 1 1.29 0.72
 3 -11 1 0.7 0.85
 3 11 -1 0.35 0.92
 -3 12 -1 0.97 0.82
 -3 12 -1 0.94 0.95
 3 12 1 -0.54 0.77
 -3 12 -1 -2.25 1.47
 -3 -12 1 -0.6 0.87
 3 -12 -1 0.5 0.87
 -3 -12 1 -0.44 0.9
 3 -12 -1 0.34 0.9
 -3 -12 1 -0.19 0.66
 3 12 1 0.47 1.51
 3 12 1 0.54 0.95
 3 -12 1 0.39 0.45
 -3 -12 -1 1 0.91
 -3 -12 -1 -1.26 0.9
 -3 12 1 1.8 1.53
 3 -12 1 0.65 0.89
 -3 -12 -1 -0.77 0.67
 -3 12 1 -0.18 0.93
 3 12 -1 0.75 0.88
 3 12 -1 -0.65 0.8
 -3 12 1 0.57 0.76
 3 -12 1 -0.07 0.91
 -3 -12 -1 0.54 0.96
 3 -13 -1 3.65 1.04
 -3 -13 1 2.63 0.71
 3 -13 -1 1.78 0.57
 3 13 1 3.14 0.93
 -3 13 -1 2.86 0.87
 -3 -13 1 1.83 0.97
 -3 13 -1 3.42 1.02
 3 -13 -1 3.55 1.11
 -3 13 -1 2.77 1.04
 3 13 1 2.65 1.05
 3 13 1 3.14 1.09
 -3 -13 1 2.32 1.06
 -3 -13 -1 2.15 1.03
 3 -13 1 1.32 0.98
 3 13 -1 3.68 1.01
 -3 13 1 3.17 1.02
 3 -13 1 2.47 0.51
 -3 -13 -1 3.25 1.09
 3 13 -1 1.14 0.86
 3 13 -1 3.91 1.25
 3 -13 1 4.53 1.01
 -3 13 1 2.75 1.06
 -3 -13 -1 2.38 0.72
 -3 -14 1 1.61 1.03
 3 14 1 2.25 1.08
 3 14 1 2.66 1.03
 3 -14 -1 2.67 1.05
 -3 14 -1 3.19 0.95
 3 -14 -1 2.79 1.02
 -3 14 -1 2.5 1.09
 -3 -14 1 2.49 1.14
 3 14 1 1.31 1.08
 -3 -14 -1 0.89 0.76
 -3 14 1 4.03 1.35
 3 14 -1 0.17 1.08
 -3 -14 -1 2.25 1.14
 -3 -14 -1 0.4 1.13
 3 -14 1 2.55 1.08
 3 -14 1 1.9 0.56
 3 14 -1 1.12 1.05
 3 -15 -1 3.16 1.22
 3 -15 -1 1.41 0.62
 -3 15 -1 0.62 1.08
 -3 -15 1 1.27 0.83
 3 15 1 1.93 1.19
 3 15 1 3.35 1.06
 3 -15 -1 0.52 1.21
 -3 -15 1 2.05 1.2
 -3 15 -1 -0.21 1.13
 -3 15 1 3.33 1.17
 3 -15 1 0.28 1.08
 3 15 -1 3.63 1.22
 3 -15 1 1.77 1.23
 -3 -15 -1 -0.22 0.97
 3 15 -1 1.65 1.2
 -3 -15 -1 2.47 1.3
 3 15 -1 0.87 1.08
 -3 -15 -1 0.15 1.17
 3 -15 1 0.75 0.57
 -3 15 1 2.45 0.98
 3 16 1 1.47 1.25
 3 16 1 0.7 1.29
 3 -16 -1 3.02 1.24
 -3 -16 1 1.57 0.86
 -3 -16 1 2.54 1.21
 -3 16 -1 -1.13 1.13
 3 -16 -1 1.61 0.67
 -3 -16 1 1.49 1.31
 3 -16 -1 3.13 1.29
 3 -16 1 1.5 1.36
 -3 -16 -1 1.49 1.29
 3 16 -1 3.43 1.2
 3 -16 1 1.06 0.61
 3 -16 1 3.22 1.18
 -3 16 1 0.49 1.18
 3 16 -1 -0.88 1.15
 -3 -16 -1 -0.22 1.24
 -3 16 1 1.6 1.32
 3 16 -1 0.36 1.33
 -3 -16 -1 0.8 0.8
 3 -17 -1 0.06 0.7
 3 -17 -1 1.29 1.37
 -3 -17 1 -0.66 1.45
 -3 -17 1 -2.5 1.28
 3 17 1 -0.13 1.29
 -3 17 -1 2.27 1.36
 -3 17 -1 -0.47 1.13
 3 -17 -1 -0.34 1.3
 -3 17 -1 0.1 1.39
 3 17 1 2.12 1.39
 -3 -17 1 -0.26 0.94
 3 -17 1 0.71 1.45
 -3 17 1 3.07 1.43
 3 -17 1 -0.2 0.64
 3 17 -1 1.36 1.42
 -3 17 1 0 1.35
 3 17 -1 1.35 1.35
 -3 -17 -1 -0.43 1.43
 3 17 -1 -0.17 1.29
 -3 -17 -1 -0.36 1.33
 3 -17 1 0.37 1.32
 -4 0 1 -0.42 0.33
 4 0 -1 -0.78 0.36
 4 0 -1 -0.5 0.25
 -4 0 -1 -0.12 0.3
 -4 0 1 -0.77 0.25
 4 -1 -1 177.46 4.38
 -4 1 -1 184.62 4.41
 -4 -1 1 184.86 4.48
 -4 -1 1 178.46 4.4
 -4 -1 1 180.85 4.4
 4 -1 -1 181.29 4.42
 -4 -1 1 182.29 4.4
 4 1 1 176.38 4.38
 4 1 1 182.38 4.43
 -4 -1 -1 177.41 4.38
 4 1 -1 186.93 4.48
 4 1 -1 182.2 4.39
 -4 1 1 174.46 4.38
 -4 1 1 181.4 4.42
 -4 1 1 169.31 4.37
 -4 -1 -1 182.98 4.43
 4 1 -1 179.99 4.4
 -4 -2 1 19.06 0.93
 4 2 1 19.95 0.76
 4 -2 -1 19.4 0.69
 -4 2 -1 20.17 0.63
 -4 -2 1 18.56 0.8
 -4 2 -1 17.97 0.69
 4 2 1 18.96 0.79
 -4 2 -1 18.9 0.69
 4 -2 -1 19.14 0.73
 4 -2 -1 18.39 0.72
 4 2 1 19.38 0.75
 -4 -2 1 20.07 0.78
 -4 -2 1 18.34 0.79
 -4 2 1 17.73 0.73
 -4 2 1 18.56 0.72
 -4 -2 -1 18.71 0.77
 -4 -2 -1 19.15 0.82
 4 2 -1 19.31 0.78
 -4 2 1 17.57 0.68
 4 2 -1 18.39 0.77
 4 -2 1 18.46 0.69
 4 2 -1 19.33 0.76
 4 3 1 122.41 3.19
 -4 3 -1 126.84 3.17
 4 3 1 129.11 3.22
 -4 -3 1 132.75 3.27
 4 -3 -1 124.4 3.17
 4 -3 -1 127.52 3.13
 -4 3 -1 125.84 3.17
 -4 -3 1 127.74 3.21
 4 -3 -1 125.37 3.18
 -4 -3 1 126.33 3.2
 -4 -3 1 131.44 3.22
 4 3 1 126.9 3.2
 -4 -3 -1 131.01 3.22
 -4 3 1 121.37 3.11
 4 -3 1 128.72 3.17
 4 3 -1 127.6 3.2
 -4 3 1 125.83 3.18
 4 3 -1 128.33 3.21
 -4 -3 -1 124.69 3.2
 -4 3 1 125.63 3.18
 4 -4 -1 101.08 2.62
 -4 -4 1 102.05 2.69
 -4 4 -1 98.24 2.61
 -4 -4 1 103.44 2.66
 4 4 1 102.85 2.66
 -4 4 -1 100.78 2.62
 4 4 1 101.1 2.65
 4 -4 -1 99.42 2.52
 4 -4 -1 99.03 2.62
 4 4 1 104.2 2.66
 -4 -4 1 103.84 2.65
 -4 -4 1 101.49 2.65
 4 4 -1 101.84 2.65
 4 4 -1 102.82 2.67
 -4 4 1 102.22 2.63
 4 -4 1 102.16 2.62
 -4 4 1 102.88 2.6
 -4 4 1 101.46 2.63
 4 4 -1 101.11 2.65
 -4 -4 -1 100.75 2.65
 -4 -4 -1 102.21 2.67
 -4 -5 1 4.37 0.58
 4 -5 -1 5.32 0.58
 -4 -5 1 4.7 0.59
 -4 5 -1 3.83 0.51
 -4 -5 1 5.46 0.56
 4 5 1 4.28 0.56
 4 5 1 5.24 0.59
 4 5 1 4.68 0.55
 -4 5 -1 5.32 0.52
 -4 5 1 4.44 0.52
 4 5 -1 5.2 0.55
 4 -5 1 4.39 0.55
 -4 5 1 5.75 0.56
 -4 -5 -1 4.85 0.53
 -4 -5 -1 4.79 0.56
 -4 5 1 4.81 0.47
 4 5 -1 5.07 0.57
 4 -5 1 5.16 0.55
 -4 -6 1 38.54 1.38
 -4 -6 1 38.2 1.42
 4 6 1 39 1.37
 4 6 1 35.78 1.39
 4 6 1 38.25 1.4
 -4 6 -1 36.9 1.35
 4 -6 -1 38.14 1.1
 -4 6 -1 40.21 1.35
 4 -6 -1 37.27 1.36
 -4 -6 1 38.21 1.4
 4 -6 -1 40.18 1.35
 -4 -6 1 38.31 1.38
 4 6 -1 39.22 1.43
 -4 -6 -1 39.27 1.4
 -4 -6 -1 38.05 1.42
 -4 6 1 36.71 1.37
 4 -6 1 39.8 1.38
 4 6 -1 38.39 1.4
 -4 6 1 38.85 1.31
 4 -6 1 39.12 1.37
 -4 6 1 38.19 1.34
 4 6 -1 38.96 1.37
 -4 7 -1 56.26 1.72
 4 -7 -1 54.04 1.75
 -4 -7 1 55.55 1.8
 4 7 1 56.06 1.81
 -4 -7 1 51.96 1.76
 4 7 1 58.09 1.79
 4 7 1 57.77 1.77
 -4 7 -1 53.47 1.74
 -4 -7 1 57.67 1.81
 4 -7 -1 51.67 1.75
 -4 7 -1 55.41 1.76
 -4 -7 1 56 1.78
 -4 -7 -1 56.46 1.8
 4 -7 1 54.71 1.77
 4 7 -1 56.12 1.8
 4 7 -1 57.24 1.76
 -4 7 1 55.31 1.71
 4 7 -1 52.64 1.81
 -4 -7 -1 57.55 1.8
 -4 7 1 55.89 1.76
 -4 7 1 55.36 1.77
 -4 -7 -1 55.07 1.78
 4 -7 1 56.7 1.76
 4 8 1 1.14 0.62
 -4 -8 1 0.04 0.61
 -4 8 -1 0.56 0.6
 -4 -8 1 1.01 0.59
 4 -8 -1 0.6 0.64
 4 8 1 0.83 0.65
 4 8 1 0.72 0.59
 -4 -8 1 1.01 0.5
 4 -8 -1 0.59 0.64
 -4 8 -1 0.6 0.6
 -4 8 -1 0.54 0.55
 -4 -8 1 0.29 0.62
 -4 -8 -1 1.48 0.66
 4 -8 1 -0.6 0.63
 4 8 -1 0.81 0.61
 -4 -8 -1 0.78 0.6
 -4 8 1 -0.43 0.55
 4 8 -1 -0.11 0.62
 -4 8 1 -0.62 0.61
 4 -8 1 0.08 0.63
 -4 -8 -1 0.34 0.66
 4 8 -1 0.5 0.59
 -4 8 1 0.52 0.6
 4 9 1 50.07 1.82
 4 9 1 50.55 1.84
 4 -9 -1 49.57 1.81
 -4 9 -1 52.39 1.77
 -4 9 -1 50.24 1.77
 -4 -9 1 51.61 1.82
 -4 -9 1 50.84 1.83
 4 9 1 52.41 1.82
 -4 -9 1 51.38 1.77
 -4 -9 1 55.21 1.88
 -4 9 -1 54.45 1.82
 -4 9 1 49.86 1.8
 -4 9 1 49.85 1.74
 -4 9 1 50.28 1.79
 -4 -9 -1 53.88 1.87
 4 9 -1 51.25 1.84
 4 9 -1 49.45 1.82
 4 -9 1 48.38 1.79
 4 -9 1 53.76 1.81
 -4 -9 -1 51.13 1.83
 -4 -9 -1 50.48 1.81
 4 9 -1 52.24 1.81
 4 10 1 6.78 0.91
 -4 10 -1 6.08 0.78
 4 10 1 7.35 0.9
 4 -10 -1 6.94 0.83
 -4 -10 1 7.33 0.89
 4 10 1 6.16 0.84
 -4 -10 1 5.71 0.8
 -4 10 -1 5.22 0.78
 -4 10 -1 7.82 0.87
 -4 -10 1 5.9 0.67
 4 -10 1 6.59 0.81
 4 10 -1 7.17 0.79
 -4 10 1 7.12 0.86
 -4 10 1 7.8 0.76
 -4 -10 -1 6.75 0.87
 4 10 -1 6.96 0.84
 4 -10 1 6.9 0.88
 -4 -10 -1 6.25 0.91
 4 10 -1 5.63 0.85
 -4 -10 -1 6.47 0.74
 4 11 1 29.41 1.72
 4 -11 -1 29.39 1.62
 -4 11 -1 31.44 1.68
 -4 -11 1 30.64 1.69
 -4 -11 1 25.19 1.58
 4 -11 -1 27.1 1.63
 4 11 1 30.47 1.69
 -4 -11 1 27.04 1.65
 -4 -11 1 30.06 1.65
 -4 11 -1 28.84 1.5
 4 11 1 30.1 1.62
 4 11 -1 27.05 1.58
 4 11 -1 31.62 1.66
 4 11 -1 28.14 1.68
 -4 11 1 29.5 1.65
 4 -11 1 27.57 1.62
 -4 -11 -1 26.14 1.65
 -4 11 1 29.44 1.54
 -4 -11 -1 29.21 1.7
 4 -11 1 27.1 1.64
 -4 11 1 29.64 1.67
 -4 -11 -1 25.91 1.56
 -4 -12 1 3.14 0.94
 -4 12 -1 3.01 0.81
 4 -12 -1 4.86 0.98
 -4 12 -1 4.62 0.98
 -4 12 -1 5.36 1
 -4 -12 1 5.21 1.25
 4 12 1 4.3 0.95
 4 12 1 4.8 0.97
 4 -12 -1 3.43 1
 -4 -12 1 3.87 0.73
 4 12 -1 2.51 0.93
 -4 12 1 4.96 0.97
 -4 -12 -1 6.53 1.63
 -4 -12 -1 4.72 0.92
 -4 -12 -1 4.79 1.04
 -4 12 1 4.1 0.86
 4 -12 1 4.14 1
 4 12 -1 3.54 0.95
 4 -12 1 4.8 0.95
 -4 -13 1 3.95 1.04
 -4 13 -1 7.24 1.08
 4 13 1 4.84 0.94
 -4 13 -1 6.93 1.12
 4 13 1 6.35 1.1
 -4 -13 1 5.78 0.79
 4 -13 -1 6.29 1.09
 4 13 1 7 1.12
 4 -13 1 5.11 1.08
 4 13 -1 5.97 1.08
 -4 13 1 4.9 0.9
 4 13 -1 6.84 1.11
 -4 -13 -1 5.54 0.83
 -4 13 1 6.83 1.04
 -4 -13 -1 7.77 1.15
 -4 -13 -1 6.56 1.02
 4 -13 1 5.6 0.52
 -4 13 1 7.27 1.12
 4 13 -1 5.48 1.06
 -4 14 -1 -0.05 1.04
 4 14 1 0.71 1.06
 4 14 1 0.98 1.13
 -4 -14 1 -1 1.1
 4 -14 -1 0.12 1.15
 -4 -14 1 1.05 1.04
 -4 14 -1 -0.05 0.93
 4 -14 -1 0.54 0.54
 -4 -14 1 -0.08 0.79
 -4 14 -1 0.86 1.09
 4 14 1 0.1 0.98
 -4 14 1 -0.31 1.03
 4 -14 1 0.38 1.08
 4 14 -1 1.26 1.04
 -4 14 1 -0.65 0.86
 -4 14 1 0.18 1.06
 -4 -14 -1 0.2 0.96
 4 -14 1 1.22 0.48
 4 14 -1 0.46 1.08
 -4 -14 -1 -0.75 1.09
 4 -14 1 0.35 1.04
 -4 15 -1 39.02 2.24
 -4 -15 1 36.75 2.19
 -4 -15 1 37.74 1.94
 4 15 1 40.54 2.37
 4 -15 -1 40.97 2.22
 -4 -15 1 41.52 2.27
 4 -15 -1 36 1.47
 -4 15 -1 38.85 2.02
 4 15 1 35.89 2.13
 -4 -15 -1 37.04 2.24
 -4 15 1 33.68 2.16
 4 15 -1 33.3 2.15
 4 -15 1 36.24 2.17
 4 15 -1 39.13 2.13
 -4 -15 -1 37.02 2.22
 -4 15 1 37.28 2.06
 4 -15 1 37.88 2.29
 4 15 -1 35.12 2.28
 -4 15 1 38.92 2.32
 -4 -15 -1 34.28 1.99
 4 -16 -1 3.38 1.33
 4 -16 -1 2.41 0.62
 4 16 1 3.05 1.29
 4 -16 -1 5 1.35
 -4 -16 1 3.23 1.36
 -4 -16 1 1.7 1.31
 -4 16 -1 5.05 1.41
 4 16 1 3.06 1.29
 -4 16 -1 3.05 1.22
 -4 16 1 3.29 1.3
 -4 -16 -1 2.63 1.32
 4 16 -1 1.07 1.32
 -4 16 1 2.87 1.1
 -4 16 1 2.24 1.3
 4 16 -1 4.89 1.32
 4 -16 1 0.65 1.15
 4 -16 1 4.81 1.28
 -4 -16 -1 3.15 0.93
 -4 17 -1 -0.53 1.34
 -4 -17 1 0.65 1.39
 -4 17 -1 1.17 1.34
 -4 17 -1 -0.2 1.19
 4 17 1 3.1 1.49
 4 17 1 -1.91 1.36
 4 -17 -1 -2.05 1.31
 -4 -17 1 1.01 0.99
 4 17 -1 -1.6 1.37
 -4 -17 -1 -0.71 1.39
 4 17 -1 -0.08 1.38
 -4 -17 -1 -0.45 1
 -4 17 1 0.67 1.29
 -5 0 1 -0.36 0.25
 -5 0 1 0.1 0.34
 5 0 -1 0.5 0.23
 5 0 -1 0.15 0.24
 -5 0 -1 0.36 0.29
 5 0 -1 -0.29 0.36
 -5 0 -1 -0.02 0.32
 5 -1 -1 47.4 1.26
 -5 -1 1 51.99 1.47
 -5 -1 1 49.29 1.31
 -5 -1 1 48.37 1.31
 5 -1 -1 50.22 1.39
 5 1 1 49.55 1.36
 -5 1 -1 48.78 1.35
 -5 -1 1 49.45 1.31
 5 1 1 48.06 1.27
 -5 -1 -1 50.94 1.37
 -5 1 1 45.78 1.26
 -5 -1 -1 47.11 1.27
 -5 1 1 47.6 1.35
 5 1 -1 47.75 1.3
 5 1 -1 47.34 1.31
 5 1 -1 52.19 1.48
 5 2 1 7.8 0.56
 -5 2 -1 7.44 0.5
 -5 -2 1 6.04 0.47
 -5 -2 1 7.57 0.47
 -5 2 -1 6.77 0.47
 5 -2 -1 6.72 0.53
 5 -2 -1 7.28 0.57
 5 2 1 7.78 0.46
 -5 -2 1 6.88 0.6
 5 2 1 6.55 0.57
 -5 2 1 6.93 0.5
 -5 -2 -1 7.85 0.67
 -5 2 1 7.14 0.53
 -5 -2 -1 7.11 0.44
 5 2 -1 7.3 0.6
 5 2 -1 7.03 0.59
 5 2 -1 7.81 0.64
 5 -2 1 6.02 0.48
 -5 -2 -1 7.01 0.57
 5 3 1 17.49 0.8
 5 3 1 15.91 0.77
 -5 -3 1 15.66 0.81
 -5 3 -1 15.88 0.55
 -5 -3 1 16.89 0.94
 -5 -3 1 17.09 0.78
 -5 -3 1 15.94 0.8
 5 -3 -1 17.01 0.65
 5 -3 -1 16.34 0.73
 5 3 1 15.82 0.81
 -5 3 1 16.42 0.74
 5 -3 1 14.73 0.72
 5 3 -1 15.19 0.79
 -5 3 1 16.29 0.72
 -5 -3 -1 16.28 0.82
 -5 -3 -1 15.94 0.78
 5 3 -1 15.89 0.8
 -5 -3 -1 15.23 0.78
 5 -4 -1 22.14 0.89
 -5 4 -1 22.67 0.89
 5 -4 -1 21.22 0.89
 -5 -4 1 21.19 1.06
 5 4 1 22.79 0.96
 5 4 1 21.63 0.98
 -5 4 -1 20.8 0.89
 5 -4 -1 21.4 0.73
 5 4 1 20.98 0.96
 -5 -4 1 21.14 0.96
 -5 -4 1 21.84 0.96
 -5 -4 1 23.71 0.99
 -5 -4 -1 22.16 0.99
 5 4 -1 22.53 0.95
 -5 4 1 23.46 0.92
 -5 -4 -1 21.75 0.97
 -5 4 1 22.77 0.91
 5 -4 1 21.96 0.89
 5 -4 1 21.86 0.9
 5 4 -1 22.14 0.97
 -5 -4 -1 20.8 0.97
 5 4 -1 21.8 1
 -5 -5 1 20.22 1.08
 5 -5 -1 19.63 0.7
 5 5 1 21.16 1.03
 -5 5 -1 19.47 0.95
 -5 -5 1 21.83 1.01
 -5 -5 1 20.22 1.03
 5 -5 -1 20.66 0.97
 -5 5 -1 21.38 0.97
 -5 -5 1 19.34 1.04
 5 5 1 20.09 1.01
 5 -5 -1 19.68 0.96
 5 5 1 20.58 1.02
 -5 5 1 20.68 0.89
 -5 -5 -1 21.62 1.03
 5 5 -1 22.39 1.03
 -5 -5 -1 19.24 1.01
 5 -5 1 18.33 0.95
 5 -5 1 21.45 0.97
 5 5 -1 21 1.02
 -5 -5 -1 20.34 1.03
 -5 5 1 19.46 0.98
 -5 5 1 18.57 0.96
 5 5 -1 21.07 1.05
 5 6 1 8.63 0.64
 5 6 1 9.38 0.71
 5 -6 -1 8.46 0.64
 5 6 1 9.02 0.66
 5 -6 -1 9.03 0.63
 -5 6 -1 8.79 0.64
 -5 -6 1 9.9 0.76
 -5 -6 1 9.52 0.71
 -5 6 -1 9.71 0.67
 -5 -6 -1 9.28 0.7
 -5 6 1 9 0.66
 -5 6 1 10.37 0.7
 5 6 -1 9.03 0.72
 5 -6 1 8.96 0.64
 5 6 -1 8.55 0.67
 -5 -6 -1 8.7 0.66
 -5 -6 -1 10.11 0.7
 5 -6 1 10.14 0.67
 5 6 -1 9.37 0.68
 -5 -7 1 42.15 1.55
 5 7 1 44.41 1.53
 -5 -7 1 41.65 1.55
 5 7 1 43.73 1.56
 -5 -7 1 44.37 1.56
 -5 -7 1 43.58 1.55
 5 7 1 42.95 1.55
 -5 7 -1 45.67 1.51
 5 -7 -1 41.69 1.5
 -5 7 -1 41.54 1.47
 -5 7 -1 43.52 1.49
 5 -7 -1 41.61 1.49
 5 7 -1 44.84 1.54
 5 -7 1 42.16 1.49
 5 7 -1 42.63 1.53
 -5 -7 -1 44 1.54
 5 -7 1 43.88 1.5
 -5 7 1 43.9 1.52
 -5 -7 -1 41.94 1.54
 -5 7 1 43.38 1.51
 -5 -7 -1 41.74 1.57
 5 7 -1 43.67 1.57
 -5 7 1 42.67 1.46
 5 8 1 21.41 1.24
 -5 8 -1 19.08 1.11
 5 -8 -1 20.02 1.14
 -5 -8 1 20.65 1.22
 5 8 1 18.83 1.23
 5 -8 -1 19.15 1.16
 -5 8 -1 20.26 1.16
 -5 -8 1 19.39 1.17
 -5 -8 1 19.67 1.22
 -5 8 -1 21.41 1.17
 -5 -8 1 21.21 1.2
 5 8 1 20.57 1.17
 -5 8 1 21.49 1.17
 5 8 -1 18.61 1.21
 -5 8 1 19.94 1.1
 5 -8 1 19.88 1.15
 5 8 -1 20.95 1.21
 5 -8 1 19.49 1.19
 -5 8 1 19.87 1.2
 -5 -8 -1 17.14 1.25
 -5 -8 -1 21.26 1.24
 -5 -8 -1 17.87 1.17
 5 8 -1 18.7 1.19
 5 9 1 1.75 0.62
 5 9 1 1.32 0.74
 -5 -9 1 0.42 0.7
 5 -9 -1 0.29 0.7
 -5 -9 1 0.73 0.65
 5 9 1 0.97 0.73
 -5 9 -1 2.09 0.74
 -5 9 -1 0.9 0.68
 -5 9 -1 0.53 0.6
 -5 -9 1 0.55 0.69
 5 9 -1 0.94 0.71
 5 9 -1 0.5 0.67
 -5 -9 -1 1.07 0.64
 -5 9 1 0.47 0.71
 5 -9 1 0.19 0.67
 -5 -9 -1 0.12 0.74
 -5 -9 -1 0.91 0.71
 -5 9 1 -0.67 0.69
 5 9 -1 1.24 0.69
 -5 9 1 0.74 0.61
 5 -9 1 0.35 0.72
 5 -10 -1 6.61 0.46
 -5 -10 1 7.7 0.92
 -5 10 -1 6.68 0.84
 5 10 1 8.39 0.93
 -5 -10 1 8.32 0.93
 5 10 1 7.91 0.82
 -5 -10 1 7.75 0.85
 5 -10 -1 7.68 0.91
 5 10 1 8.76 0.98
 -5 10 -1 7.51 0.78
 -5 10 1 8.45 0.92
 -5 -10 -1 8.25 0.97
 -5 -10 -1 7.52 0.95
 -5 -10 -1 7.55 0.86
 -5 10 1 7.4 0.86
 5 -10 1 7.65 0.89
 5 10 -1 6.88 0.88
 -5 10 1 7.33 0.79
 5 -10 1 6.45 0.86
 5 10 -1 8.2 0.88
 5 10 -1 7.53 0.87
 -5 -11 1 1.96 0.85
 -5 11 -1 3.34 0.88
 -5 -11 1 3.04 0.92
 -5 -11 1 2.55 0.89
 5 11 1 3.01 0.84
 5 11 1 2.6 0.89
 5 11 1 4.19 0.95
 5 -11 -1 3.65 0.94
 5 -11 -1 2.27 1.2
 -5 11 -1 3.62 0.9
 -5 11 1 1.56 0.86
 5 -11 1 1.83 1.04
 5 11 -1 2.4 0.87
 -5 -11 -1 0.92 0.9
 -5 -11 -1 2.22 0.93
 -5 11 1 2.8 0.89
 -5 -11 -1 1.36 0.68
 5 11 -1 2.52 0.87
 -5 -11 -1 3.24 0.82
 5 11 -1 1.91 0.93
 5 -11 1 2.41 0.84
 5 12 1 0.4 1
 5 12 1 1.69 0.97
 5 -12 -1 1.67 0.88
 5 -12 -1 0.06 0.9
 -5 -12 1 0.49 0.88
 -5 -12 1 0.21 1.05
 -5 12 -1 0.52 0.8
 5 12 1 1.8 0.84
 -5 -12 1 0.22 0.68
 -5 12 -1 2.09 0.93
 -5 -12 1 0.44 0.95
 5 -12 1 0.95 0.98
 -5 12 1 1.26 0.93
 -5 -12 -1 1.11 0.88
 5 12 -1 1.8 0.93
 -5 -12 -1 1.5 0.95
 -5 12 1 0.62 0.79
 5 12 -1 1.29 0.96
 -5 -12 -1 0.16 0.97
 -5 -12 -1 -0.29 0.68
 5 12 -1 -0.15 0.85
 5 -13 -1 0 0.46
 -5 13 -1 -0.81 0.97
 -5 13 -1 0.49 0.88
 5 -13 -1 1.79 0.96
 5 13 1 1.66 1
 -5 13 -1 0.01 1.01
 -5 -13 1 1.83 1.35
 5 13 1 -0.07 1.05
 5 13 1 1.21 0.95
 -5 -13 1 -0.14 0.74
 -5 -13 1 -0.14 0.96
 5 -13 -1 1.04 1.02
 5 -13 -1 -0.23 0.45
 -5 -13 -1 1.36 0.99
 -5 13 1 0.12 0.84
 -5 -13 -1 0.25 0.79
 5 -13 1 -1.09 0.99
 -5 13 1 0.01 1.03
 5 13 -1 0.43 0.94
 -5 -13 -1 3.37 1.73
 -5 13 1 1.56 0.95
 5 13 -1 0.68 0.92
 5 13 -1 0.93 1.01
 5 -13 1 1.07 0.93
 -5 -14 1 1.72 1.09
 -5 -14 1 -0.45 1.15
 5 14 1 -1.19 1.04
 -5 14 -1 0.6 0.9
 5 14 1 0.4 1.02
 -5 14 -1 1.02 1.11
 5 14 1 0.54 1.14
 5 -14 -1 -0.4 1.11
 -5 14 -1 0.34 1.09
 5 -14 -1 -0.58 1.11
 -5 -14 1 -0.78 0.84
 -5 14 1 2.5 1.12
 -5 -14 -1 -0.93 1.12
 -5 -14 -1 0.93 0.83
 -5 14 1 1.65 0.99
 5 -14 1 1.4 1.02
 5 14 -1 1.28 1.01
 5 14 -1 1.18 1.12
 -5 -14 -1 0.21 1.11
 5 -14 1 1 1.06
 -5 -14 -1 -1.41 1.02
 5 14 -1 -0.02 1.03
 -5 -15 1 1.95 0.91
 -5 15 -1 4.07 1.2
 5 15 1 2.22 1.1
 -5 -15 1 4.25 1.25
 5 -15 -1 0.66 2.01
 -5 -15 1 1.4 1.09
 5 15 1 0.39 1.25
 5 -15 -1 1.75 1.19
 -5 15 -1 1.41 1.18
 -5 -15 -1 -0.16 1.21
 -5 15 1 1.47 1.19
 5 -15 1 2.44 1.1
 5 15 -1 2.1 1.07
 5 -15 1 1.1 1.36
 5 15 -1 0.13 1.18
 5 15 -1 -0.19 1.17
 -5 -15 -1 2.89 1.21
 -5 15 1 1.51 1.22
 5 16 1 2.55 1.43
 5 16 1 1.32 1.2
 -5 -16 1 1.26 0.98
 -5 16 -1 -0.15 1.29
 -5 16 -1 0.3 1.3
 5 -16 -1 3.42 1.24
 -5 -16 1 1.53 1.33
 -5 -16 1 0.36 1.25
 5 16 1 -0.92 1.2
 -5 16 1 0.3 1.19
 5 16 -1 1.37 1.2
 -5 16 1 1.53 1.28
 -5 -16 -1 2.13 1.28
 -5 16 1 0.26 1.01
 5 16 -1 -1.75 1.29
 5 16 -1 0.52 1.12
 -5 -16 -1 0.57 0.93
 -5 -16 -1 1.15 1.38
 -6 0 1 0.32 0.34
 -6 0 -1 -0.36 0.3
 6 0 -1 -0.17 0.37
 6 0 -1 0.41 0.24
 -6 0 1 -0.09 0.24
 6 0 -1 -0.18 0.16
 -6 0 -1 -0.11 0.29
 -6 -1 1 10.36 0.55
 -6 -1 1 8.31 0.54
 6 1 1 9.5 0.62
 -6 -1 1 8.52 0.77
 -6 -1 1 9.56 0.53
 6 -1 -1 7.86 0.72
 -6 -1 -1 10.22 0.63
 6 1 -1 8.96 0.58
 -6 1 1 9.27 0.48
 6 1 -1 9.59 0.83
 -6 1 1 10.3 0.43
 6 1 -1 9.73 0.51
 -6 -1 -1 10.29 0.46
 -6 1 1 8.3 0.65
 6 2 1 1.34 0.38
 -6 -2 1 0.34 0.4
 -6 2 -1 1.02 0.29
 6 -2 -1 1.05 0.33
 -6 -2 1 0.86 0.38
 6 2 1 0.93 0.34
 6 2 -1 1.31 0.36
 6 2 -1 1.5 0.37
 -6 -2 -1 0.4 0.34
 -6 -2 -1 1.2 0.42
 -6 2 1 1.25 0.34
 6 2 -1 0.95 0.4
 -6 2 1 0.84 0.29
 -6 -2 -1 1.64 0.39
 -6 -2 -1 0.97 0.34
 -6 3 -1 17.34 0.72
 -6 -3 1 17.84 1
 -6 3 -1 17.77 0.65
 6 3 1 18 0.86
 -6 -3 1 18.21 0.85
 -6 3 -1 19.13 0.71
 -6 -3 1 17.14 0.83
 6 3 1 18.18 0.82
 -6 -3 1 19.09 0.83
 6 -3 -1 16.76 0.73
 6 -3 -1 18.06 0.76
 6 3 1 16.94 0.81
 -6 -3 -1 18.6 0.82
 -6 -3 -1 18.75 0.82
 -6 -3 -1 17.12 0.85
 6 3 -1 17.62 0.84
 6 -3 1 18.1 0.74
 -6 3 1 18.3 0.75
 -6 3 1 16.76 0.69
 -6 3 1 18.4 0.74
 6 3 -1 17.64 0.82
 -6 4 -1 113.05 2.87
 -6 -4 1 114.65 2.95
 6 -4 -1 107.56 2.87
 6 -4 -1 116.09 2.89
 6 4 1 111.36 2.92
 -6 -4 1 114.66 3.02
 6 4 1 114.39 2.96
 6 4 1 111.53 2.92
 -6 -4 1 113.76 2.93
 -6 -4 1 110.08 2.93
 6 -4 -1 110.83 2.82
 -6 4 -1 117.17 2.88
 -6 -4 -1 112.42 2.93
 6 4 -1 112.92 2.95
 6 -4 1 114.12 2.87
 -6 4 1 111.04 2.89
 -6 4 1 113.02 2.89
 6 4 -1 113.92 2.93
 6 4 -1 114.6 2.95
 -6 -4 -1 113.38 2.95
 -6 -4 -1 111.79 2.93
 6 -4 1 115.21 2.88
 6 -5 -1 106.94 2.84
 -6 -5 1 112.66 2.92
 6 -5 -1 109.84 2.85
 6 -5 -1 107.41 2.72
 6 5 1 108.39 2.9
 -6 5 -1 109.75 2.84
 6 5 1 106.21 2.89
 -6 -5 1 111.03 2.98
 6 5 1 107.3 2.88
 -6 -5 1 112.51 2.9
 -6 -5 1 112.69 2.9
 -6 5 -1 105.86 2.84
 -6 -5 -1 106.85 2.91
 -6 -5 -1 106.07 2.88
 -6 -5 -1 113.53 2.9
 6 5 -1 110.79 2.9
 6 -5 1 113.19 2.85
 6 5 -1 108.99 2.88
 6 5 -1 109.4 2.91
 -6 5 1 110.69 2.85
 6 -5 1 107.49 2.83
 -6 5 1 109.22 2.84
 -6 6 -1 13.2 0.92
 -6 -6 1 13.63 1.05
 6 6 1 14.33 1.01
 -6 -6 1 13.33 0.99
 -6 -6 1 14.84 1.08
 6 6 1 13.11 1.01
 6 6 1 14.25 1
 6 -6 -1 13.14 0.92
 -6 -6 1 14.6 1.01
 6 -6 -1 13.35 0.95
 -6 6 -1 13.46 0.93
 -6 6 1 15.04 0.87
 6 -6 1 13.42 0.94
 -6 -6 -1 15.52 1.01
 6 6 -1 14.1 1.04
 6 6 -1 14.76 0.96
 6 -6 1 12.88 0.92
 6 6 -1 14.85 0.98
 -6 6 1 14.8 0.94
 -6 -6 -1 12.86 1.03
 -6 6 1 12.85 0.89
 -6 -7 1 130.04 3.42
 -6 7 -1 131.45 3.37
 -6 -7 1 130.05 3.43
 6 -7 -1 126.21 3.37
 -6 -7 1 130.73 3.48
 6 -7 -1 127.93 3.38
 -6 7 -1 126.79 3.37
 -6 -7 1 127.38 3.41
 6 7 1 127.94 3.41
 6 7 1 131.03 3.43
 6 7 1 127.33 3.42
 -6 7 1 123.8 3.34
 -6 7 1 123.17 3.37
 -6 -7 -1 132.49 3.43
 -6 -7 -1 128.82 3.44
 -6 -7 -1 128.66 3.42
 -6 7 1 123.78 3.36
 6 7 -1 130.82 3.43
 6 7 -1 127.5 3.42
 6 7 -1 131.96 3.41
 6 -7 1 131.4 3.38
 6 -7 1 125.21 3.36
 6 -8 -1 72.86 2.21
 6 8 1 73.66 2.26
 6 8 1 74.88 2.27
 -6 8 -1 74.02 2.19
 6 8 1 76.02 2.25
 -6 -8 1 73.83 2.25
 -6 8 -1 74.61 2.19
 -6 -8 1 74.84 2.29
 -6 -8 1 73.48 2.25
 6 -8 -1 73.66 2.2
 -6 8 -1 73.04 2.17
 -6 -8 1 71.18 2.25
 -6 8 1 72.54 2.2
 -6 -8 -1 74.45 2.26
 6 8 -1 75.12 2.25
 6 -8 1 74.79 2.21
 -6 8 1 69.27 2.19
 6 8 -1 77.47 2.27
 6 8 -1 74.73 2.26
 6 -8 1 75.93 2.21
 -6 -8 -1 75.33 2.27
 -6 -8 -1 75.08 2.26
 -6 8 1 75.1 2.17
 -6 -8 -1 74.5 2.26
 6 9 1 53.88 1.91
 -6 9 -1 53.93 1.87
 -6 -9 1 54.76 1.96
 6 9 1 57.14 1.92
 -6 9 -1 51.99 1.83
 6 -9 -1 53.38 1.85
 -6 -9 1 56.36 1.93
 -6 -9 1 56.69 1.95
 -6 9 -1 57.87 1.89
 -6 -9 1 53.84 1.93
 6 9 1 54.84 1.94
 6 -9 1 55.66 1.88
 -6 -9 -1 55.74 1.95
 6 9 -1 51.7 1.9
 6 -9 1 53.77 1.87
 -6 9 1 54.36 1.88
 -6 -9 -1 51.01 1.9
 6 9 -1 53.8 1.9
 -6 -9 -1 55.44 1.93
 -6 9 1 53.62 1.82
 -6 -9 -1 52.07 1.92
 -6 9 1 53.9 1.89
 6 9 -1 58.29 1.92
 6 10 1 23.48 1.52
 -6 10 -1 22.14 1.37
 -6 -10 1 21.01 1.46
 -6 -10 1 18.9 1.44
 -6 10 -1 24 1.42
 -6 -10 1 21.14 1.41
 6 10 1 21.27 1.53
 6 10 1 21.38 1.45
 6 -10 -1 18.91 1.4
 -6 -10 1 23.19 1.48
 -6 10 -1 24.06 1.44
 -6 10 1 20.93 1.43
 6 10 -1 22.01 1.46
 -6 -10 -1 22.87 1.56
 6 10 -1 23.99 1.47
 -6 -10 -1 21.63 1.51
 -6 10 1 22.96 1.47
 -6 10 1 22.09 1.33
 -6 -10 -1 21.39 1.46
 6 -10 1 22.04 1.46
 6 -10 1 20.2 1.47
 -6 -10 -1 22.93 1.47
 6 10 -1 19.86 1.44
 -6 -11 1 3.16 0.9
 6 -11 -1 2.1 0.88
 6 -11 -1 3.42 0.91
 -6 11 -1 3.65 0.89
 6 11 1 1.97 0.96
 -6 -11 1 3.27 0.98
 6 11 1 2.47 1.14
 6 11 1 3.42 0.91
 -6 11 -1 2.17 0.78
 -6 -11 1 1.93 0.7
 -6 11 -1 3.99 0.87
 -6 -11 1 3.21 0.95
 -6 11 1 1.9 0.87
 6 -11 1 3.93 1.02
 6 -11 1 4.47 0.9
 -6 -11 -1 4.07 0.98
 -6 11 1 2.06 0.88
 -6 11 1 3.26 0.79
 -6 -11 -1 3.54 0.98
 -6 -11 -1 2.17 0.88
 6 11 -1 4.09 1.04
 6 11 -1 2.43 0.89
 6 12 1 2.59 0.98
 -6 12 -1 1.82 0.84
 6 -12 -1 2.77 0.94
 6 -12 -1 2.31 0.97
 -6 -12 1 2.29 0.98
 6 12 1 3.41 0.94
 -6 -12 1 2.79 0.76
 -6 12 -1 3.46 0.98
 6 12 1 4.24 1.04
 -6 -12 1 3.8 0.99
 -6 -12 1 4.45 0.96
 -6 12 -1 2.31 0.99
 6 12 -1 4.54 0.87
 -6 12 1 3.11 0.92
 6 12 -1 2.2 0.96
 -6 -12 -1 4.75 1.02
 -6 -12 -1 4.83 1.08
 -6 12 1 2.71 0.84
 6 -12 1 3.6 1.02
 6 -12 1 3.41 0.91
 -6 -12 -1 2.66 0.86
 -6 12 1 4.24 0.95
 -6 -12 -1 2.31 0.78
 6 12 -1 3.7 0.87
 -6 -13 1 25.32 1.85
 -6 -13 1 21.86 1.77
 6 13 1 22.73 1.86
 -6 13 -1 28.04 1.86
 6 -13 -1 25.3 1.75
 -6 13 -1 23.76 1.82
 6 -13 -1 24.26 1.84
 6 13 1 26.96 1.84
 6 13 -1 28.06 1.93
 -6 13 1 23.4 1.77
 -6 13 1 24.67 1.86
 -6 -13 -1 25.08 1.82
 6 13 -1 28.9 1.82
 -6 -13 -1 27.64 2.33
 -6 -13 -1 24.7 1.8
 6 -13 1 24.93 1.77
 6 13 -1 27.75 1.89
 -6 -13 -1 26.78 1.86
 6 -13 1 28.13 1.8
 -6 14 -1 9.09 1.19
 -6 14 -1 8.92 1.21
 6 14 1 6.65 1.26
 6 -14 -1 7.32 1.13
 6 14 1 7.29 1.19
 -6 -14 1 5.84 1.09
 -6 -14 1 8.71 1
 -6 -14 1 6.34 1.19
 6 -14 -1 6.96 1.19
 -6 14 1 6.86 1.07
 -6 14 1 10.09 1.26
 -6 14 1 8.25 1.21
 6 14 -1 8.29 1.27
 -6 -14 -1 7.83 1.15
 -6 -14 -1 7.93 1.27
 -6 -14 -1 6.75 0.94
 6 14 -1 7.05 1.08
 6 -14 1 9.21 1.19
 6 14 -1 9.81 1.21
 -6 -14 -1 9.44 1.23
 6 -15 -1 7.58 1.27
 6 15 1 8.76 1.37
 -6 -15 1 7.69 1.05
 -6 15 -1 6.91 1.13
 6 -15 -1 9.89 1.21
 -6 15 -1 8.27 1.35
 -6 -15 -1 6.01 1.43
 -6 -15 -1 5.83 1
 -6 -15 -1 10.62 1.47
 6 15 -1 8.88 1.23
 6 -15 1 9.44 1.25
 6 15 -1 7.2 1.3
 -6 15 1 5.88 1.3
 -6 15 1 5.97 1.31
 6 -15 1 9.09 1.24
 6 15 -1 5.92 1.21
 -6 16 -1 2.55 1.28
 6 16 1 4.67 1.31
 -6 16 -1 6.12 1.25
 6 16 1 3.93 1.15
 -6 -16 1 3.97 1.36
 -6 16 -1 6.78 1.31
 -6 -16 1 3.26 1.03
 6 -16 -1 5.38 1.3
 6 -16 -1 5.55 1.33
 6 16 1 4.77 1.46
 -6 -16 -1 6.66 1.43
 6 16 -1 3.61 1.29
 -6 16 1 7.42 1.4
 -6 16 1 3.93 1.3
 -6 16 1 3.52 1.09
 6 16 -1 4.77 1.47
 -6 -16 -1 3.03 1.04
 -6 -16 -1 5.76 1.46
 6 -16 1 5.34 1.23
 6 -16 1 6.72 1.32
 6 16 -1 6.43 1.33
 7 0 -1 0.54 0.41
 -7 0 -1 0.31 0.31
 -7 0 1 0.49 0.35
 -7 0 1 0.07 0.28
 -7 -1 1 11.36 0.56
 7 1 1 12.24 0.7
 -7 -1 1 10.11 0.67
 -7 1 -1 12.06 0.6
 7 -1 -1 11.35 0.78
 -7 -1 1 11.17 0.85
 -7 1 -1 9.88 0.7
 -7 -1 1 12.53 0.6
 7 1 -1 10.71 0.55
 -7 1 1 10.66 0.71
 -7 -1 -1 10.71 0.84
 -7 -1 -1 11.88 0.69
 7 1 -1 11.58 0.62
 -7 1 1 11.34 0.54
 7 -2 -1 9.53 0.55
 -7 -2 1 11.05 0.64
 7 2 1 11.37 0.61
 -7 -2 1 9.73 0.66
 7 2 1 10.77 0.74
 7 -2 -1 10.4 0.74
 7 2 -1 10.43 0.67
 7 2 -1 10.31 0.7
 -7 -2 -1 10.63 0.73
 -7 -2 -1 11.06 0.6
 -7 -2 -1 10.23 0.61
 7 2 -1 11.34 0.64
 -7 2 1 9.15 0.66
 -7 2 1 11.57 0.52
 -7 -3 1 17.89 1.04
 -7 3 -1 17 0.71
 7 3 1 18.36 0.87
 7 -3 -1 17.08 0.76
 7 3 1 17.8 0.81
 7 3 1 17.03 0.8
 -7 -3 1 16.72 0.83
 -7 -3 1 17.32 0.86
 -7 -3 1 15.38 0.84
 -7 3 1 16.69 0.73
 -7 -3 -1 17.36 0.79
 7 3 -1 16.45 0.85
 -7 3 1 17.6 0.71
 -7 -3 -1 16.81 1.06
 7 -3 1 16.38 0.7
 7 3 -1 17.83 0.82
 -7 -3 -1 16.52 0.81
 -7 -4 1 15.32 0.87
 -7 -4 1 13.83 1.05
 -7 4 -1 13.25 0.74
 -7 4 -1 14.66 0.58
 7 4 1 14.19 0.86
 -7 4 -1 13.79 0.75
 7 -4 -1 13.73 0.74
 7 4 1 14.41 0.84
 7 4 1 14.64 0.88
 7 -4 -1 15.3 0.68
 -7 -4 1 14.14 0.87
 7 -4 -1 14.24 0.79
 -7 -4 1 15.59 0.93
 -7 -4 -1 12.95 0.86
 -7 4 1 15.03 0.77
 7 -4 1 13.9 0.91
 -7 4 1 12.94 0.76
 -7 -4 -1 15.35 0.9
 7 4 -1 13.49 0.86
 -7 -4 -1 14.45 0.85
 7 4 -1 14.17 0.9
 7 -4 1 14.7 0.78
 -7 -4 -1 14.66 1.05
 7 4 -1 15.87 0.88
 7 5 1 29.63 1.17
 -7 -5 1 30.76 1.3
 -7 -5 1 30.01 1.18
 7 -5 -1 29.26 0.93
 -7 5 -1 29.57 1.09
 -7 5 -1 29.55 1.08
 7 5 1 29.4 1.18
 7 -5 -1 30.37 1.11
 7 5 1 29.97 1.18
 -7 -5 1 31.59 1.24
 -7 -5 1 28.65 1.19
 -7 5 1 30.87 0.9
 -7 5 1 28.69 1.09
 -7 5 1 29.7 1.12
 7 5 -1 29.59 1.2
 7 -5 1 29.87 1.11
 -7 -5 -1 29.46 1.2
 7 -5 1 28.23 1.07
 -7 -5 -1 28.66 1.17
 7 5 -1 30.55 1.18
 -7 -5 -1 28.8 1.3
 7 6 1 2.56 0.64
 7 6 1 3.27 0.56
 -7 -6 1 3.12 0.59
 -7 -6 1 3.42 0.58
 -7 6 -1 3.56 0.56
 -7 -6 1 3.03 0.57
 -7 -6 1 3.07 0.59
 7 -6 -1 2.78 0.54
 7 6 1 3.2 0.58
 7 -6 -1 2.43 0.55
 -7 6 -1 3.14 0.54
 7 -6 1 2.82 0.58
 -7 -6 -1 2.45 0.54
 7 -6 1 3.4 0.55
 7 6 -1 3.92 0.67
 -7 -6 -1 2.66 0.58
 7 6 -1 2.29 0.55
 -7 6 1 3.11 0.58
 -7 6 1 3.03 0.49
 -7 -6 -1 4.03 0.67
 -7 -6 -1 2.56 0.59
 -7 6 1 3.37 0.55
 7 6 -1 2.19 0.57
 -7 7 -1 14.34 0.99
 -7 -7 1 12.69 1.12
 -7 7 -1 14.59 1
 -7 -7 1 13.73 1.1
 7 7 1 12.62 1.11
 -7 -7 1 14.4 1.16
 7 -7 -1 14.55 0.99
 7 7 1 14.53 1.1
 7 -7 -1 12.86 0.97
 7 7 1 12.62 1.09
 -7 -7 1 13.42 1.08
 7 -7 1 13.43 1.01
 -7 7 1 14.6 0.99
 -7 7 1 12.82 0.94
 -7 -7 -1 13.91 1.13
 7 7 -1 13.4 1.09
 7 7 -1 13.23 1.03
 -7 -7 -1 12.71 1.08
 7 -7 1 13 0.98
 -7 -7 -1 14.32 1.18
 -7 -7 -1 13.92 1.15
 7 7 -1 14.36 1.09
 -7 7 1 11.91 0.99
 7 8 1 1.56 0.72
 -7 -8 1 0.68 0.64
 7 8 1 0.69 0.7
 7 -8 -1 1.27 0.62
 -7 -8 1 1.05 0.67
 -7 -8 1 1.43 0.72
 -7 8 -1 0.3 0.6
 -7 8 -1 0.21 0.56
 7 -8 -1 0.93 0.58
 -7 8 -1 0.97 0.63
 7 8 1 0.94 0.66
 -7 8 1 -0.23 0.54
 7 8 -1 0.33 0.62
 7 -8 1 1.68 0.61
 7 8 -1 -0.08 0.71
 7 -8 1 0.04 0.65
 -7 -8 -1 0.7 0.62
 -7 -8 -1 0.55 0.63
 -7 -8 -1 0.83 0.67
 -7 -8 -1 1.19 0.75
 -7 8 1 0.74 0.65
 -7 8 1 1.39 0.61
 7 8 -1 2.15 0.71
 -7 -9 1 18.57 1.34
 7 9 1 17.55 1.32
 -7 -9 1 15.42 0.99
 7 9 1 18.39 1.3
 -7 -9 1 17.17 1.34
 -7 9 -1 17.97 1.26
 -7 9 -1 15.38 1.17
 7 9 1 18.68 1.37
 -7 -9 1 18.25 1.31
 -7 9 -1 16.4 1.25
 7 -9 -1 17.56 1.05
 -7 -9 -1 15.86 1.05
 7 -9 1 15.99 1.25
 7 -9 1 15.39 1.26
 -7 9 1 15 1.22
 7 9 -1 16.72 1.27
 -7 9 1 15.14 1.24
 7 9 -1 16.44 1.32
 7 9 -1 16.86 1.31
 -7 -9 -1 17.2 1.35
 -7 -9 -1 14.58 0.98
 -7 9 1 16.06 1.18
 7 -10 -1 4.4 0.8
 -7 10 -1 5.21 0.84
 -7 10 -1 3.22 0.75
 7 10 1 3.53 0.84
 -7 -10 1 4.66 0.87
 7 10 1 4.96 0.85
 -7 -10 1 3.3 0.74
 -7 -10 1 4.22 0.84
 7 -10 -1 3.41 0.8
 -7 10 -1 6.26 0.87
 -7 -10 1 2.92 0.82
 7 10 1 4.04 0.93
 7 -10 1 5.32 0.87
 -7 -10 -1 4.42 0.83
 -7 10 1 5.33 0.91
 7 10 -1 5.42 0.95
 -7 -10 -1 5.66 1
 -7 10 1 4.2 0.87
 7 10 -1 4.8 0.85
 -7 -10 -1 3.8 0.77
 7 10 -1 4.97 0.79
 -7 10 1 4.82 0.76
 -7 11 -1 13.68 1.01
 7 -11 -1 14.16 1.05
 -7 -11 1 11.1 1.6
 -7 11 -1 11.53 1.65
 -7 -11 1 12.27 0.93
 -7 -11 1 14.11 1.24
 -7 -11 1 16.21 1.17
 7 11 1 14.75 1.16
 7 -11 -1 11.99 1.1
 7 11 1 14.98 1.12
 -7 11 1 14.41 0.98
 -7 -11 -1 12.75 0.97
 7 -11 1 15.05 1.06
 7 11 -1 14.37 1.13
 -7 11 1 14.17 1.11
 7 11 -1 14.42 1.08
 -7 -11 -1 14.31 1.13
 -7 -11 -1 13.71 1.2
 -7 -12 1 2.34 0.97
 -7 12 -1 0.21 0.93
 7 12 1 1.26 0.97
 -7 12 -1 1.34 0.86
 -7 -12 1 -0.07 1.19
 7 -12 -1 -0.04 0.88
 7 12 1 1.4 0.88
 7 -12 -1 2.75 0.91
 -7 12 -1 1.5 0.92
 -7 -12 1 2.47 0.95
 7 12 1 1.24 0.94
 7 12 -1 1.61 0.9
 7 -12 1 1.35 0.92
 -7 -12 -1 2.29 1.03
 -7 12 1 0.38 0.88
 -7 -12 -1 1.06 0.77
 -7 12 1 0.83 0.95
 7 12 -1 1.11 0.87
 7 12 -1 1.92 1.02
 7 -12 1 1.47 0.93
 -7 -12 -1 2.91 0.91
 -7 -12 -1 -0.23 0.91
 7 13 1 0.93 1.07
 7 13 1 0.51 0.92
 -7 -13 1 0.12 1.07
 -7 -13 1 0.69 1.02
 -7 13 -1 0.29 0.93
 7 13 1 -0.88 0.96
 -7 13 -1 -0.5 0.96
 7 -13 -1 0.06 1.01
 -7 -13 1 0.78 1.33
 7 -13 -1 0.5 1
 -7 -13 1 -1.24 0.82
 -7 -13 -1 -0.77 1.01
 7 13 -1 1.07 0.97
 7 -13 1 0.85 0.93
 -7 13 1 -0.75 1.01
 -7 -13 -1 0.07 0.83
 -7 13 1 -0.37 1.01
 7 13 -1 0.41 0.99
 7 13 -1 2.42 1.14
 -7 -13 -1 -1.44 0.96
 -7 -14 1 0 1.05
 7 14 1 0.03 1.02
 -7 14 -1 0.67 1.03
 7 -14 -1 1.12 1.07
 -7 14 -1 0.51 1.07
 -7 14 -1 -1.02 0.96
 7 14 1 0.76 1.2
 -7 -14 1 -1.45 1.18
 7 -14 -1 -0.93 1.02
 -7 -14 1 -0.28 0.84
 7 14 1 0.51 1.17
 -7 -14 -1 1.71 1.15
 -7 -14 -1 -0.49 1
 7 14 -1 -0.28 1.13
 -7 -14 -1 1.25 0.92
 -7 14 1 0.02 0.91
 7 -14 1 0.55 1.05
 -7 14 1 0.45 1.08
 7 14 -1 -0.44 1.12
 7 14 -1 1.17 1.06
 -7 14 1 2.11 1.1
 -7 -14 -1 -0.8 1.17
 -7 15 -1 0.8 1.03
 7 15 1 2.84 1.18
 -7 15 -1 1.94 1.17
 -7 -15 1 3.71 1.38
 -7 -15 1 2.47 1.01
 7 15 1 3.15 1.33
 -7 15 -1 -0.76 1.16
 -7 -15 1 0.76 1.16
 -7 -15 -1 2.61 1.22
 -7 -15 -1 0.71 0.93
 7 15 -1 1.84 1.25
 7 15 -1 0.81 1.2
 7 -15 1 3.25 1.25
 -7 -15 -1 -0.8 1.23
 7 -15 1 1.49 1.03
 -7 15 1 0.13 1.06
 7 15 -1 -0.56 1.12
 -7 15 1 0.6 1.13
 -7 16 -1 3.48 1.3
 -7 -16 1 1.76 1.31
 7 16 1 4.38 1.37
 7 -16 -1 -0.99 1.24
 -7 -16 1 2.06 1.46
 7 -16 -1 3.28 1.44
 7 16 1 1.88 1.35
 -7 -16 -1 -0.05 1.29
 7 -16 1 0.63 1.26
 -7 -16 -1 1.11 1.04
 -7 -16 -1 0.81 1.38
 -7 16 1 2.26 1.3
 7 -16 1 2.58 1.2
 7 16 -1 1.67 1.44
 7 16 -1 0.81 1.32
 8 0 -1 0.53 0.45
 -8 0 1 -0.38 0.3
 -8 0 1 0.08 0.39
 -8 -1 1 25.64 0.83
 8 -1 -1 25.01 1.09
 -8 -1 1 25.31 0.89
 8 1 1 25.36 0.95
 -8 1 -1 26.5 0.88
 -8 -1 1 26.33 1.1
 -8 1 -1 26.17 0.97
 -8 1 1 27.9 1.02
 -8 -1 -1 24.04 1.1
 8 1 -1 26.52 0.81
 -8 1 1 24.75 0.83
 -8 -1 -1 25.48 0.95
 8 1 -1 25.84 0.89
 8 -2 -1 89.83 2.4
 8 2 1 89.64 2.3
 -8 -2 1 93.91 2.32
 8 2 1 88.68 2.39
 -8 -2 1 89.41 2.37
 -8 -2 1 93.93 2.51
 -8 2 -1 91.18 2.37
 -8 -2 1 89.77 2.33
 -8 -2 -1 89.57 2.3
 8 2 -1 91.64 2.32
 -8 -2 -1 92.7 2.52
 8 2 -1 89.5 2.37
 -8 2 1 90.6 2.38
 -8 -2 -1 90.64 2.4
 -8 -3 1 4.96 0.49
 8 3 1 4.84 0.47
 -8 -3 1 4.49 0.51
 8 3 1 4.51 0.48
 8 -3 -1 4.28 0.41
 8 -3 -1 3.95 0.41
 8 3 1 4.53 0.46
 -8 -3 1 3.86 0.48
 -8 -3 1 4.52 0.55
 -8 3 -1 3.76 0.36
 -8 -3 -1 4.54 0.45
 -8 3 1 3.61 0.37
 8 3 -1 3.85 0.46
 8 3 -1 4.71 0.5
 8 3 -1 4.43 0.47
 -8 -3 -1 4.48 0.51
 -8 -3 -1 4.32 0.46
 -8 3 1 3.74 0.5
 -8 -4 1 111.03 2.81
 8 4 1 108.38 2.75
 8 -4 -1 106.95 2.69
 8 4 1 108.22 2.81
 -8 -4 1 101.32 2.76
 -8 -4 1 106.24 2.9
 -8 -4 1 104.09 2.76
 -8 4 -1 102.18 2.64
 -8 4 -1 106.04 2.68
 8 4 1 103.88 2.74
 8 -4 -1 107.36 2.7
 -8 4 -1 102.51 2.67
 8 4 -1 109.95 2.79
 -8 4 1 102.7 2.69
 -8 -4 -1 104.61 2.75
 8 4 -1 107.93 2.77
 -8 -4 -1 104.75 2.74
 -8 -4 -1 109.77 2.93
 8 -4 1 106.49 2.69
 -8 4 1 99.27 2.66
 8 4 -1 103.18 2.75
 -8 -4 -1 108.21 2.83
 -8 4 1 100.46 2.68
 8 -5 -1 98.83 2.52
 8 5 1 101.11 2.67
 8 5 1 97.71 2.7
 -8 -5 1 101.78 2.8
 -8 -5 1 100.22 2.67
 -8 -5 1 99.93 2.66
 8 5 1 99.43 2.65
 -8 5 -1 98.48 2.58
 8 -5 -1 99.39 2.61
 8 -5 -1 94.01 2.58
 -8 5 -1 97.98 2.58
 -8 -5 -1 105.31 2.84
 8 5 -1 101.1 2.68
 8 5 -1 101.46 2.66
 -8 -5 -1 98.94 2.65
 -8 -5 -1 101.59 2.71
 -8 -5 -1 98.21 2.65
 -8 5 1 95.76 2.59
 8 -5 1 97.58 2.57
 8 5 -1 101.54 2.69
 8 -5 1 102.01 2.6
 -8 5 1 94.93 2.59
 -8 6 -1 21.11 0.99
 -8 -6 1 21.18 1.25
 -8 -6 1 22.26 1.11
 8 -6 -1 19.06 0.75
 8 6 1 19.45 1.11
 -8 6 -1 20.07 0.99
 8 6 1 20.7 1.07
 8 6 1 19.75 1.1
 8 6 -1 22.52 1.1
 -8 -6 -1 22.42 1.15
 -8 -6 -1 18.38 1.27
 -8 -6 -1 23.09 1.11
 8 -6 1 19.71 0.96
 -8 6 1 20.22 1.03
 -8 6 1 19.82 0.99
 8 -6 1 21.25 1.02
 8 6 -1 19.04 1.13
 8 7 1 4.18 0.67
 -8 7 -1 2.97 0.61
 8 7 1 4.52 0.66
 8 -7 -1 3.59 0.59
 8 7 1 4.06 0.66
 -8 -7 1 3.12 0.73
 -8 -7 1 2.6 0.66
 -8 7 -1 2.9 0.59
 -8 -7 1 2.91 0.59
 8 -7 -1 3.28 0.63
 -8 -7 1 3.8 0.67
 -8 -7 -1 3.02 0.66
 8 -7 1 2.86 0.61
 8 7 -1 2.89 0.61
 8 7 -1 3.5 0.68
 -8 -7 -1 3.84 0.65
 -8 7 1 2.85 0.59
 8 -7 1 3.41 0.58
 -8 -7 -1 3.98 0.7
 8 7 -1 3.28 0.65
 -8 7 1 3.71 0.55
 -8 7 1 2.92 0.59
 8 -8 -1 45.73 1.65
 -8 -8 1 46.28 1.74
 8 8 1 48.45 1.77
 -8 8 -1 49.05 1.67
 -8 -8 1 49.05 1.8
 -8 -8 1 51.09 1.87
 -8 -8 1 50.71 1.75
 -8 8 -1 47.97 1.67
 8 8 1 49.22 1.73
 8 8 1 49.06 1.75
 8 -8 1 47.15 1.67
 -8 -8 -1 48.84 1.8
 -8 -8 -1 47.61 1.76
 8 8 -1 47.85 1.78
 8 8 -1 49.81 1.74
 8 -8 1 48.44 1.64
 -8 8 1 46.85 1.68
 -8 8 1 45.14 1.59
 -8 8 1 47.96 1.66
 -8 -8 -1 48.76 1.87
 8 8 -1 46.11 1.74
 -8 -8 -1 49.16 1.76
 8 9 1 3.23 0.81
 8 9 1 1.83 0.74
 8 -9 -1 0.87 0.69
 -8 9 -1 1.66 0.72
 -8 -9 1 0.77 0.64
 -8 -9 1 1.41 0.74
 -8 9 -1 1.65 0.65
 8 9 1 2.7 0.79
 -8 -9 1 2.27 0.82
 -8 -9 1 1.93 0.76
 -8 9 1 2.09 0.76
 -8 9 1 2.18 0.64
 -8 9 1 1.59 0.72
 8 -9 1 2.15 0.69
 -8 -9 -1 2.39 0.79
 -8 -9 -1 1.84 0.77
 8 -9 1 2.81 0.76
 8 9 -1 0.86 0.74
 -8 -9 -1 1.11 0.78
 -8 -9 -1 0.87 0.69
 8 9 -1 2.29 0.83
 8 9 -1 2.53 0.78
 -8 -10 1 0.54 0.7
 -8 10 -1 0.18 0.84
 8 -10 -1 0.65 0.75
 -8 -10 1 1.05 0.81
 8 10 1 1.23 1
 -8 -10 1 0.98 0.8
 -8 10 -1 1.31 0.75
 -8 -10 1 1.8 0.87
 -8 10 -1 0.19 0.72
 8 -10 -1 0.13 0.81
 -8 -10 -1 0.44 0.72
 -8 -10 -1 0.44 0.93
 8 10 -1 -0.18 0.75
 -8 -10 -1 1.12 0.79
 -8 10 1 1.2 0.72
 8 10 -1 0.08 0.94
 8 10 -1 1.25 1.01
 -8 -10 -1 1.07 0.83
 8 -10 1 1.45 0.78
 8 -10 1 1.28 0.8
 -8 10 1 0.81 0.77
 -8 10 1 -0.18 0.75
 -8 -11 1 -0.44 1.16
 8 11 1 1.78 0.92
 -8 11 -1 -0.63 0.84
 -8 -11 1 0.55 0.91
 8 -11 -1 1.45 0.9
 8 11 1 0.07 0.88
 -8 -11 1 0.61 0.9
 -8 11 -1 0.53 0.88
 8 -11 -1 -0.82 0.88
 8 11 1 -0.33 0.84
 -8 -11 -1 1.76 1.32
 8 -11 1 0.57 0.88
 -8 -11 -1 -0.58 0.88
 -8 -11 -1 -0.49 0.84
 8 11 -1 0.47 0.86
 8 11 -1 -0.6 0.8
 -8 -11 -1 0.82 0.85
 -8 11 1 0.7 0.81
 8 11 -1 -0.68 0.81
 -8 11 1 0.08 0.81
 -8 -12 1 0.33 1.02
 8 12 1 2.14 0.95
 -8 -12 1 2.75 0.98
 -8 -12 1 0.63 0.97
 -8 12 -1 0.58 1.01
 8 -12 -1 -0.81 0.83
 8 12 1 1.21 1.01
 -8 -12 1 -0.35 0.74
 -8 12 -1 -0.56 0.94
 -8 12 -1 1.7 0.93
 -8 12 1 0.01 0.81
 -8 -12 -1 1.52 0.92
 -8 12 1 1.07 0.94
 8 12 -1 1.52 0.95
 -8 -12 -1 2.38 1.01
 8 -12 1 1.25 0.92
 8 -12 1 1.11 0.89
 -8 12 1 -0.21 0.94
 8 12 -1 0.36 0.92
 8 12 -1 0.64 1
 -8 -12 -1 0.87 0.75
 -8 -13 1 -1.07 0.84
 8 13 1 0.57 1.05
 -8 13 -1 2.72 1.03
 -8 -13 1 -0.17 1.02
 -8 13 -1 0.61 0.96
 8 -13 -1 0.05 0.99
 8 13 1 1.27 1.06
 -8 -13 1 1.1 1.12
 8 13 1 -0.57 1.1
 -8 13 -1 -0.89 0.9
 8 -13 1 0.83 1.01
 -8 -13 -1 1.21 1.05
 8 13 -1 3.07 1.18
 -8 13 1 -0.79 0.85
 8 13 -1 0.2 0.94
 -8 13 1 0.37 1.03
 -8 13 1 0.84 0.99
 8 -13 1 1.22 1.03
 -8 -13 -1 -0.68 1.05
 -8 -13 -1 0.33 0.99
 -8 14 -1 4.01 1.15
 8 14 1 5.36 1.22
 8 -14 -1 2.97 1.1
 -8 14 -1 4.94 1.07
 -8 14 -1 4.33 1.08
 -8 -14 1 2.56 1.14
 8 14 1 6.46 1.27
 -8 -14 1 2.56 0.94
 8 -14 -1 5.66 1.17
 -8 -14 1 4.57 1.16
 -8 14 1 6.79 1.22
 -8 -14 -1 5.37 1.19
 -8 14 1 3.99 1.01
 -8 -14 -1 5.97 1.23
 8 14 -1 4.84 1.24
 8 14 -1 5.25 1.29
 -8 -14 -1 3.73 1.19
 8 -14 1 2.63 1.12
 -8 14 1 2.28 1.1
 8 -14 1 4.28 1.25
 -8 15 -1 -0.04 1.2
 8 15 1 0.55 1.05
 -8 -15 1 2.23 1.32
 -8 -15 1 2.58 1.01
 -8 15 -1 0.26 1.06
 8 15 -1 1.35 1.17
 -8 -15 -1 1.32 0.97
 8 15 -1 0.85 1.27
 -8 -15 -1 1.16 1.15
 -8 -15 -1 2.1 1.25
 8 -15 1 0.38 1.24
 -8 -15 -1 3.34 1.33
 -8 15 1 1.33 1.26
 -8 15 1 0.57 1.05
 8 15 -1 0.45 1.21
 8 16 1 -1.25 1.31
 8 -16 -1 0.66 1.39
 -8 -16 1 3.71 1.4
 -8 16 -1 3.61 1.21
 8 -16 -1 1.16 1.26
 -8 16 -1 -0.96 1.18
 8 16 1 1.38 1.51
 -8 -16 1 2.85 1.09
 8 -16 1 3.88 1.4
 -8 16 1 1.63 1.37
 8 16 -1 1.45 1.36
 -8 -16 -1 0.36 1.32
 -8 -16 -1 1.94 1.37
 -9 0 1 0.46 0.4
 -9 0 -1 0.27 0.38
 -9 0 -1 0.06 0.34
 -9 -1 1 7.86 0.54
 -9 -1 1 8.01 0.6
 -9 1 -1 8.46 0.75
 -9 1 -1 7.13 0.59
 9 1 1 7.47 0.5
 -9 1 1 8.83 0.75
 9 1 -1 7.96 0.63
 -9 -1 -1 8.36 0.7
 -9 1 1 7.25 0.56
 -9 2 -1 2.39 0.4
 -9 -2 1 3.39 0.39
 9 2 1 2.81 0.34
 -9 -2 1 2.37 0.51
 -9 -2 1 3.31 0.41
 9 -2 -1 3.14 0.44
 9 2 1 2.74 0.44
 -9 -2 -1 2.5 0.54
 9 2 -1 3.09 0.42
 9 2 -1 3.27 0.38
 -9 2 1 3.66 0.34
 -9 -2 -1 2.8 0.51
 -9 -2 -1 3.36 0.46
 -9 -3 1 5.76 0.51
 9 3 1 4.5 0.51
 9 -3 -1 4.63 0.44
 -9 3 -1 4.33 0.4
 -9 -3 1 4.78 0.5
 9 3 1 5.97 0.46
 -9 -3 1 5.05 0.57
 -9 -3 -1 5.16 0.53
 -9 3 1 4.66 0.42
 -9 -3 -1 4.89 0.56
 -9 -3 -1 5.54 0.46
 -9 -3 -1 4.73 0.47
 9 3 -1 6.05 0.48
 -9 3 1 4.15 0.45
 9 3 -1 5 0.49
 9 4 1 -0.55 0.46
 -9 -4 1 -0.9 0.48
 9 -4 -1 -0.1 0.41
 9 4 1 -0.23 0.44
 -9 -4 1 0.52 0.48
 -9 -4 1 -0.46 0.45
 -9 4 -1 0.42 0.3
 -9 -4 1 -0.13 0.5
 9 4 1 -0.06 0.46
 9 -4 -1 -0.08 0.35
 -9 4 1 -0.42 0.31
 9 -4 1 0.07 0.19
 9 4 -1 -0.04 0.46
 9 -4 1 0.06 0.37
 -9 -4 -1 0.53 0.45
 9 4 -1 -0.91 0.49
 -9 4 1 0.44 0.38
 9 4 -1 0.53 0.46
 -9 -4 -1 -0.03 0.48
 -9 4 1 -0.39 0.39
 -9 -4 -1 -0.34 0.49
 -9 -4 -1 0.37 0.46
 9 -5 -1 14.29 0.74
 -9 5 -1 14.81 0.8
 -9 -5 1 15.65 1.16
 -9 -5 1 15.32 1.02
 -9 5 -1 14.25 0.8
 9 5 1 14.92 1
 9 5 1 14.59 0.9
 9 5 1 15.88 0.95
 9 -5 -1 13.7 0.83
 -9 -5 1 13.91 0.95
 -9 -5 1 15.02 0.95
 9 -5 -1 14.41 0.77
 -9 -5 -1 14.47 1.17
 -9 5 1 15.29 0.81
 9 5 -1 14.53 0.93
 -9 -5 -1 15.28 0.94
 9 5 -1 13.96 0.95
 9 5 -1 14.11 0.97
 -9 -5 -1 16.08 1.05
 -9 5 1 14.27 0.8
 9 -5 1 14.22 0.82
 -9 -5 -1 15.23 0.91
 9 -6 -1 -0.64 0.52
 -9 -6 1 0.03 0.57
 9 6 1 0.23 0.61
 9 -6 -1 -0.11 0.3
 9 6 1 0.61 0.54
 -9 -6 1 -0.22 0.59
 -9 6 -1 -0.75 0.49
 9 -6 -1 0.83 0.49
 9 6 1 0.41 0.57
 -9 -6 1 -0.19 0.57
 -9 6 -1 0.1 0.49
 9 -6 1 0.18 0.48
 -9 6 1 -0.03 0.49
 -9 -6 -1 -0.07 0.58
 -9 -6 -1 0.71 0.59
 -9 -6 -1 -0.18 0.56
 9 6 -1 -0.49 0.58
 9 6 -1 -0.29 0.56
 9 -6 1 0.57 0.54
 -9 6 1 0.26 0.5
 9 6 -1 0.03 0.55
 -9 -6 -1 -0.18 0.58
 -9 -7 1 6.86 0.71
 -9 -7 1 5.88 0.74
 -9 -7 1 5.75 0.73
 -9 7 -1 6.76 0.63
 -9 7 -1 6.84 0.64
 9 -7 -1 5.91 0.63
 9 7 1 5.69 0.69
 9 7 1 5.94 0.71
 9 7 1 5.45 0.69
 -9 -7 -1 4.77 0.69
 9 -7 1 5.11 0.61
 -9 7 1 6.29 0.66
 -9 7 1 4.6 0.58
 -9 -7 -1 4.93 0.68
 -9 -7 -1 5.97 0.73
 9 -7 1 5.68 0.67
 9 7 -1 5.01 0.67
 9 7 -1 5.26 0.72
 -9 -7 -1 5.46 0.71
 9 7 -1 5.25 0.7
 -9 7 1 6.03 0.66
 9 -8 -1 6.24 0.71
 -9 8 -1 7 0.75
 -9 8 -1 7.26 0.73
 9 8 1 8.41 0.83
 9 8 1 6.72 0.78
 9 8 1 7.16 0.84
 -9 -8 1 6.37 0.81
 -9 -8 1 5.4 0.86
 -9 -8 1 6.18 0.74
 9 -8 1 6.82 0.74
 9 -8 1 7.22 0.74
 -9 8 1 6.1 0.75
 -9 -8 -1 7.26 0.83
 -9 -8 -1 7.47 0.83
 -9 8 1 6.98 0.76
 -9 8 1 5.64 0.66
 9 8 -1 7.51 0.85
 9 8 -1 8.2 0.81
 -9 -8 -1 6.84 0.83
 -9 -9 1 1.54 0.7
 -9 9 -1 2.4 0.76
 9 -9 -1 1.21 0.71
 -9 -9 1 2.29 0.75
 -9 9 -1 2.7 0.73
 -9 -9 1 2.39 0.85
 9 9 1 0.86 0.79
 9 9 1 2.27 0.8
 9 9 1 3.44 0.79
 -9 9 -1 2.19 0.68
 -9 -9 1 2.36 0.81
 -9 -9 -1 0.34 0.81
 -9 9 1 2.17 0.76
 -9 -9 -1 1.26 0.73
 9 9 -1 2.05 0.77
 9 9 -1 3.35 0.76
 -9 -9 -1 1.86 0.76
 -9 9 1 1.23 0.74
 9 9 -1 3.83 0.87
 9 -9 1 2.37 0.73
 9 -9 1 2.49 0.81
 -9 9 1 1.43 0.66
 -9 -9 -1 2.18 0.82
 -9 10 -1 1.33 0.8
 9 -10 -1 0.99 0.78
 -9 -10 1 0.72 0.82
 9 10 1 0.51 1.01
 9 10 1 0.94 0.83
 -9 10 -1 0.78 0.71
 -9 -10 1 2.33 0.87
 9 -10 -1 2.3 1.44
 -9 10 -1 0.18 0.83
 -9 -10 1 0.99 1.01
 -9 -10 -1 0.95 1.28
 9 10 -1 0.79 0.82
 -9 10 1 0.92 0.79
 -9 10 1 1.52 0.79
 -9 10 1 0.79 0.72
 9 -10 1 1.14 1.06
 9 -10 1 0.32 0.78
 9 10 -1 2.9 1
 9 10 -1 0.61 0.84
 -9 -10 -1 1.01 1.28
 -9 -10 -1 1.27 1
 9 11 1 -0.05 0.99
 9 11 1 0.53 0.8
 -9 11 -1 0.25 0.83
 9 11 1 2.17 0.93
 -9 -11 1 0.42 0.89
 -9 -11 1 -0.47 0.84
 -9 -11 1 1.94 0.93
 -9 -11 1 0.47 0.78
 -9 11 -1 0.84 0.88
 9 -11 -1 1.06 0.88
 9 -11 -1 -0.09 0.86
 -9 11 -1 -0.65 0.77
 -9 -11 -1 1.61 0.86
 9 11 -1 2.45 0.94
 -9 -11 -1 0.86 0.89
 -9 -11 -1 2.13 0.94
 9 -11 1 -0.25 0.83
 -9 11 1 0.45 0.85
 -9 11 1 0.67 0.79
 9 -11 1 -0.19 0.84
 9 11 -1 1.22 0.85
 -9 12 -1 0.2 0.91
 -9 -12 1 -0.2 0.81
 -9 -12 1 -0.18 0.95
 9 12 1 0.47 0.97
 -9 12 -1 0.87 0.94
 9 -12 -1 2.33 0.93
 9 12 1 0.53 1
 9 12 1 0.76 0.92
 -9 -12 1 1.23 0.94
 -9 -12 1 -1.52 0.99
 -9 12 1 -0.59 0.81
 -9 -12 -1 2.04 1.04
 9 -12 1 -0.64 0.87
 9 -12 1 0.55 0.89
 9 12 -1 -0.96 0.92
 -9 -12 -1 0.94 1
 -9 12 1 -1.42 0.93
 -9 12 1 0.14 0.97
 -9 -12 -1 0.64 0.95
 -9 -12 -1 -1.12 0.81
 9 12 -1 2.05 1.01
 9 13 1 0.87 1.04
 -9 13 -1 -0.69 0.96
 9 13 1 -0.95 1.09
 -9 13 -1 0.66 0.94
 -9 -13 1 -0.23 0.95
 -9 13 -1 0.55 0.93
 -9 -13 1 -0.87 0.84
 -9 -13 1 -0.24 0.98
 9 -13 -1 1.35 0.99
 -9 -13 1 -1 0.96
 9 -13 -1 1.05 1
 -9 -13 -1 2.3 1.21
 9 -13 1 -0.87 1.01
 -9 -13 -1 -0.37 1.05
 9 13 -1 -1.59 1.15
 9 13 -1 0.42 1.04
 -9 13 1 1.88 1
 -9 13 1 -0.91 0.9
 -9 -13 -1 -0.07 0.84
 9 13 -1 -1.26 1.06
 -9 -13 -1 -0.37 1.01
 9 14 1 -1.55 0.91
 9 14 1 0.47 2.02
 -9 -14 1 -2.07 1.12
 -9 -14 1 1.79 0.98
 9 14 1 2.27 1.21
 -9 -14 1 0 1.12
 -9 14 -1 0.91 1.03
 9 -14 -1 2.11 1.13
 9 -14 -1 -0.39 1.12
 -9 14 -1 -1.25 1.1
 -9 14 -1 -1.49 0.99
 9 14 -1 -0.61 1.14
 -9 -14 -1 0.12 0.94
 -9 14 1 0.25 0.95
 -9 -14 -1 -0.94 1.15
 -9 -14 -1 1.59 1.31
 9 -14 1 0.54 1.05
 -9 14 1 -2.18 1.08
 -9 14 1 0.07 1.06
 -9 -14 -1 1.7 1.12
 9 14 -1 -0.66 1.21
 9 -14 1 -0.96 1.07
 -9 15 -1 0.04 1.12
 -9 -15 1 -1.35 0.96
 9 15 1 0.62 1.13
 -9 -15 1 -0.97 1.11
 9 15 1 0.23 1.39
 -9 15 -1 -0.81 1.06
 -9 -15 1 -0.61 1.17
 9 -15 -1 1.03 1.14
 -9 15 -1 -1.34 1.17
 9 -15 -1 1.06 1.07
 -9 -15 -1 -0.34 1.21
 -9 15 1 0.39 1.29
 9 15 -1 -0.21 1.29
 9 15 -1 0.12 1.25
 -9 -15 -1 1.09 1.29
 -9 15 1 -0.7 1.05
 -9 -15 -1 1.89 1.04
 9 -15 1 0.04 1.06
 -9 -15 -1 0.59 1.24
 -10 0 -1 0.19 0.36
 -10 0 -1 -0.12 0.38
 -10 0 1 0.58 0.42
 -10 1 -1 47.77 1.48
 -10 -1 1 47.67 1.39
 -10 1 -1 44.95 1.37
 -10 -1 1 50.15 1.6
 -10 1 1 45.59 1.34
 -10 -1 -1 48.54 1.56
 -10 1 1 48.21 1.49
 10 1 -1 47.59 1.39
 -10 -1 -1 49.76 1.44
 -10 2 -1 129.03 3.31
 -10 -2 1 128.96 3.23
 -10 -2 1 132.22 3.29
 -10 -2 1 134.71 3.44
 10 2 1 124.96 3.31
 -10 2 -1 124.7 3.25
 -10 -2 -1 127.66 3.19
 10 2 -1 127.05 3.29
 -10 2 1 129.63 3.32
 -10 2 1 125.24 3.22
 -10 -2 -1 131.02 3.32
 -10 -2 -1 130.45 3.43
 10 2 -1 127.2 3.21
 10 -3 -1 62.04 1.74
 -10 3 -1 58.86 1.67
 -10 -3 1 58.48 1.65
 -10 -3 1 61.77 1.91
 10 3 1 57.61 1.61
 -10 -3 1 58.66 1.63
 10 3 1 57.36 1.73
 10 3 -1 56 1.7
 -10 -3 -1 58.99 1.62
 -10 -3 -1 59.52 1.76
 -10 -3 -1 61.92 1.94
 10 3 -1 58.12 1.63
 10 3 -1 58.37 1.71
 -10 3 1 56.13 1.69
 -10 -3 -1 56.11 1.62
 -10 -4 1 49.26 1.5
 -10 -4 1 49.51 1.51
 -10 -4 1 51.54 1.76
 -10 4 -1 48.48 1.42
 10 4 1 49.12 1.47
 10 -4 -1 49.59 1.41
 -10 -4 1 49.28 1.58
 10 4 1 48.49 1.49
 10 -4 -1 50.36 1.5
 10 4 1 50.49 1.59
 -10 4 1 47.74 1.39
 10 4 -1 50.53 1.56
 -10 -4 -1 47.67 1.49
 10 4 -1 50.3 1.54
 -10 -4 -1 48.79 1.48
 10 4 -1 49.49 1.49
 -10 -4 -1 47.93 1.76
 -10 -4 -1 50.93 1.62
 -10 5 -1 1.53 0.48
 -10 -5 1 1.95 0.61
 10 5 1 1.15 0.56
 -10 -5 1 0.38 0.54
 10 -5 -1 1.63 0.38
 10 5 1 1.9 0.54
 10 -5 -1 1.59 0.48
 10 5 1 1.84 0.55
 -10 -5 1 0.58 0.53
 -10 -5 1 1.62 0.58
 -10 5 -1 1.16 0.3
 -10 5 -1 0.76 0.43
 -10 -5 -1 2.29 0.56
 10 -5 1 0.62 0.46
 10 5 -1 1.71 0.53
 10 5 -1 1.89 0.54
 -10 -5 -1 1.95 0.58
 -10 -5 -1 1.33 0.51
 10 5 -1 1.25 0.57
 -10 5 1 2.38 0.45
 -10 5 1 0.9 0.45
 -10 -6 1 18.79 1.33
 -10 6 -1 17.08 0.94
 10 6 1 14.76 1.06
 -10 -6 1 16.04 1.2
 10 6 1 15.89 1.11
 10 -6 -1 17.98 0.79
 10 -6 -1 16.71 0.89
 -10 6 -1 17.4 0.92
 -10 -6 1 17.38 1.09
 10 6 1 16.55 1.09
 -10 -6 1 16.31 1.1
 -10 -6 -1 15.4 1.31
 -10 6 1 15.59 0.94
 -10 6 1 16.15 0.94
 -10 -6 -1 17.85 1.21
 -10 -6 -1 16.93 1.06
 -10 6 1 16.08 0.72
 10 6 -1 15.57 1.08
 10 -6 1 17.58 0.95
 10 6 -1 17.64 1.13
 -10 -6 -1 16.23 1.09
 10 6 -1 18.17 1.09
 10 7 1 3.29 0.68
 -10 -7 1 2.09 0.64
 10 7 1 2.71 0.66
 -10 7 -1 2.63 0.6
 -10 -7 1 1.79 0.68
 10 7 1 2.58 0.72
 10 -7 -1 3.59 0.62
 -10 -7 1 3.04 0.65
 -10 -7 1 1.87 0.7
 -10 7 -1 3.33 0.58
 -10 -7 -1 2.91 0.69
 -10 -7 -1 1.93 0.69
 10 7 -1 2.58 0.71
 -10 -7 -1 1.64 0.67
 -10 7 1 3.44 0.62
 -10 7 1 3.09 0.6
 10 7 -1 2.71 0.66
 -10 -7 -1 1.87 0.69
 10 7 -1 3.04 0.67
 10 -7 1 2.52 0.6
 10 -7 1 3.83 0.57
 10 8 1 6.47 0.81
 10 -8 -1 6.75 0.72
 -10 8 -1 4.8 0.7
 -10 -8 1 4.86 0.76
 -10 -8 1 6.01 0.85
 -10 -8 1 5.29 0.86
 10 8 1 4.21 0.74
 -10 -8 1 6.08 0.82
 -10 8 -1 5.41 0.73
 10 8 1 5.01 0.81
 10 8 -1 5.42 0.78
 10 -8 1 6.46 0.7
 -10 -8 -1 6.25 0.8
 -10 -8 -1 4.94 0.76
 -10 -8 -1 4.66 0.83
 10 8 -1 6.18 0.79
 -10 -8 -1 6.1 0.82
 -10 8 1 6.93 0.74
 -10 8 1 6.41 0.66
 10 -8 1 5.25 0.73
 10 8 -1 5.48 0.78
 -10 8 1 5.45 0.72
 -10 -9 1 3.1 0.78
 10 -9 -1 4.02 0.76
 -10 9 -1 2.3 0.76
 -10 -9 1 3.47 0.8
 -10 9 -1 3.69 0.75
 10 9 1 3.03 0.83
 -10 -9 1 1.81 0.81
 -10 -9 1 3.26 0.85
 10 -9 -1 3.99 0.78
 -10 9 -1 3.29 0.72
 10 9 1 3.81 0.82
 10 9 -1 2.91 0.94
 -10 -9 -1 2.98 0.85
 -10 9 1 3.21 0.75
 10 9 -1 3.69 1.08
 -10 9 1 2.78 0.68
 -10 9 1 3.93 0.77
 -10 -9 -1 1.76 0.81
 10 -9 1 3.32 0.75
 10 9 -1 4.59 0.85
 -10 -9 -1 3.88 0.85
 10 -9 1 2.92 0.74
 -10 10 -1 1.94 0.78
 -10 -10 1 2.46 0.88
 -10 10 -1 0.77 0.81
 -10 -10 1 1.19 0.85
 -10 10 -1 1.54 0.7
 10 10 1 1.87 0.83
 10 10 1 1.5 0.8
 -10 -10 1 3.11 0.78
 10 10 1 0.85 0.87
 10 -10 -1 2.19 0.82
 -10 10 1 2.07 0.8
 -10 -10 -1 3.03 0.82
 10 10 -1 1.2 0.86
 -10 -10 -1 1.84 0.9
 -10 -10 -1 2.06 0.97
 -10 -10 -1 2.52 0.87
 -10 10 1 1.64 0.72
 10 -10 1 1.37 0.81
 -10 10 1 2.96 1.01
 10 10 -1 1.81 0.9
 10 10 -1 1.88 0.89
 -10 -11 1 10.62 1.06
 10 -11 -1 14.42 1.1
 10 11 1 11.8 1.1
 -10 11 -1 10.69 0.99
 -10 -11 1 10.82 1.09
 -10 -11 1 13.47 1.19
 10 11 1 11.31 1.15
 -10 11 -1 13.97 1.04
 10 -11 -1 13.8 1.08
 -10 11 -1 11.66 1.04
 10 11 1 13.16 1.15
 -10 -11 1 11 1.03
 10 11 -1 13.07 1.16
 -10 -11 -1 14.68 1.18
 -10 11 1 10.93 1.03
 10 -11 1 11.73 1.02
 -10 11 1 13.01 1.07
 -10 -11 -1 13.02 1.15
 -10 -11 -1 12.57 1.12
 10 11 -1 9.98 1.06
 10 11 -1 10.31 1.1
 10 12 1 1.19 1.02
 -10 -12 1 3.4 1.03
 -10 -12 1 -0.7 1.05
 -10 12 -1 0.51 0.92
 -10 12 -1 0.25 1.03
 10 12 1 1.07 0.98
 10 -12 -1 0.99 0.94
 -10 -12 1 1.55 0.87
 10 -12 -1 0.75 0.9
 10 12 1 0.9 1.08
 -10 12 -1 2.18 0.96
 -10 12 1 1.14 0.95
 10 12 -1 1.97 1.08
 -10 12 1 1.17 0.96
 -10 -12 -1 1.75 0.86
 -10 12 1 1.17 0.83
 -10 -12 -1 1.86 0.98
 10 -12 1 -0.35 0.88
 10 12 -1 2.53 1.06
 10 12 -1 2.11 1.05
 -10 -12 -1 2.09 1.01
 10 -12 1 -0.22 0.89
 10 13 1 2.34 1.09
 -10 -13 1 2.74 1.18
 10 -13 -1 2.96 0.99
 -10 -13 1 1.14 1.11
 -10 -13 1 2.61 0.97
 -10 13 -1 3.79 1.02
 10 -13 -1 3.14 1.12
 10 13 1 2.98 0.99
 -10 -13 1 1.86 1.06
 10 13 1 1.43 1.16
 10 13 -1 3.32 1.02
 -10 13 1 0.75 0.9
 -10 -13 -1 1.8 0.92
 -10 13 1 2.73 0.97
 10 13 -1 3.97 1.14
 -10 -13 -1 2.12 1.05
 -10 13 1 2.26 1.11
 -10 -13 -1 3.18 1.1
 10 -13 1 2.81 0.99
 10 13 -1 1.43 1.1
 -10 -14 1 2.12 1.17
 -10 14 -1 0.51 1.08
 -10 14 -1 0.82 1.1
 -10 -14 1 0.25 1.26
 -10 -14 1 0.58 1.12
 10 14 1 4.79 2.05
 -10 14 -1 3.07 1.07
 10 -14 -1 2.92 1.12
 10 14 1 1.65 1.19
 -10 14 1 0.01 0.96
 10 14 -1 1.17 1.19
 10 14 -1 1.19 1.06
 -10 14 1 1.75 1.09
 -10 -14 -1 0.32 1.16
 10 14 -1 1.01 1.56
 -10 14 1 2.19 1.08
 -10 -14 -1 1.67 0.98
 -10 -14 -1 0.72 1.21
 -10 15 -1 1.32 1.25
 -10 -15 1 3.28 1.33
 10 15 1 4.09 1.47
 -10 15 -1 4.12 1.18
 -10 -15 1 3.68 1.16
 10 15 1 5.94 1.39
 10 15 1 4.65 1.28
 10 15 -1 2.84 1.4
 -10 15 1 4.32 1.1
 10 -15 1 5.03 1.2
 10 15 -1 2.97 1.32
 -10 -15 -1 2.37 1.19
 -10 -15 -1 1.98 1.09
 -10 15 1 1.46 1.2
 -10 -15 -1 1.45 1.32
 -10 15 1 4.28 1.28
 -10 -15 -1 2.38 1.28
 10 15 -1 0.94 1.41
 -11 0 -1 0.47 0.39
 -11 0 1 0.16 0.43
 -11 0 -1 0.55 0.42
 -11 -1 1 4.84 0.44
 -11 1 -1 4.57 0.44
 -11 -1 1 3.8 0.54
 -11 1 -1 4.34 0.48
 -11 -1 -1 4.59 0.48
 -11 1 1 3.94 0.41
 -11 1 1 4.71 0.49
 11 2 1 8.64 0.59
 -11 -2 1 7.6 0.63
 -11 2 -1 7.16 0.65
 -11 -2 1 9.08 0.64
 -11 2 1 6.88 0.61
 11 2 -1 8.61 0.56
 -11 -2 -1 9.41 0.83
 -11 -2 -1 6.85 0.63
 -11 3 -1 1.94 0.43
 -11 -3 1 2.53 0.46
 11 3 1 2.77 0.51
 11 3 1 2.82 0.41
 -11 -3 1 3.16 0.5
 -11 -3 1 3.04 0.43
 -11 -3 1 2.36 0.55
 11 3 -1 2.22 0.48
 -11 -3 -1 2.67 0.55
 11 3 -1 2.64 0.44
 -11 -3 -1 2.67 0.52
 -11 -3 -1 3.47 0.43
 11 4 1 10.03 0.64
 -11 4 -1 8.42 0.51
 11 4 1 9.3 0.59
 -11 -4 1 8.8 0.77
 11 4 1 8.75 0.68
 -11 -4 1 10.36 0.64
 -11 -4 1 7.72 0.73
 -11 -4 -1 9.44 0.6
 11 4 -1 9 0.63
 -11 -4 -1 8.45 0.73
 -11 -4 -1 10.14 0.61
 -11 -4 -1 8.79 0.69
 -11 4 1 8.4 0.62
 11 4 -1 8.91 0.65
 -11 4 1 8.16 0.63
 11 5 1 2.88 0.6
 -11 5 -1 2.65 0.36
 11 5 1 3.16 0.56
 11 5 1 3.48 0.58
 -11 -5 1 2.63 0.64
 -11 5 -1 2.46 0.45
 -11 5 -1 3 0.44
 -11 -5 1 3.25 0.57
 -11 -5 1 3.24 0.6
 11 5 -1 4.15 0.6
 -11 -5 -1 2.86 0.63
 -11 5 1 2.82 0.48
 -11 -5 -1 2.39 0.58
 -11 5 1 3.23 0.51
 -11 -5 -1 3.49 0.65
 -11 -5 -1 1.93 0.56
 11 5 -1 3.83 0.61
 11 5 -1 3.54 0.57
 -11 6 -1 1.06 0.51
 11 6 1 1.37 0.6
 -11 -6 1 1.89 0.67
 -11 -6 1 2.37 0.67
 11 -6 -1 0.85 0.49
 11 6 1 1.45 0.63
 -11 -6 1 2.24 0.65
 11 6 1 1.02 0.61
 -11 -6 1 0.6 0.61
 11 6 -1 1.24 0.63
 -11 -6 -1 2.34 0.68
 -11 6 1 1.73 0.53
 11 -6 1 1.98 0.53
 11 6 -1 1.53 0.61
 -11 -6 -1 0.76 0.58
 -11 -6 -1 1.45 0.65
 -11 -6 -1 0.57 0.57
 11 6 -1 1.09 0.61
 -11 6 1 1.88 0.53
 -11 6 1 0.89 0.32
 11 -7 -1 9.88 0.69
 -11 7 -1 9.59 0.7
 -11 -7 1 7.76 0.81
 11 7 1 8.07 0.77
 -11 7 -1 9.32 0.69
 11 7 1 8.57 0.82
 -11 -7 1 7.09 0.81
 -11 -7 1 9.17 0.81
 -11 -7 1 8.57 0.84
 11 7 1 8.54 0.81
 -11 -7 -1 7.95 0.76
 11 -7 1 8.2 0.7
 11 7 -1 7.69 0.78
 11 -7 1 10.2 0.89
 -11 -7 -1 7.44 0.79
 11 7 -1 8.67 0.83
 11 7 -1 8.88 0.79
 -11 7 1 7.86 0.69
 -11 7 1 8.96 0.71
 -11 -7 -1 8.43 0.79
 -11 -7 -1 8.38 0.87
 11 8 1 9.62 0.9
 -11 -8 1 11.99 0.91
 -11 -8 1 10.95 0.94
 11 8 1 11.09 0.95
 11 8 1 10.13 0.93
 -11 8 -1 12.8 0.84
 11 -8 -1 10.37 0.83
 -11 -8 1 11.69 0.97
 11 -8 -1 11.28 0.8
 -11 -8 1 9.2 0.89
 11 -8 1 10.86 0.82
 -11 -8 -1 10.25 0.97
 -11 8 1 10.35 0.82
 11 -8 1 11.74 0.99
 11 8 -1 10.94 0.95
 -11 8 1 9.82 0.76
 -11 8 1 12.08 0.83
 -11 -8 -1 11.41 0.94
 11 8 -1 11.24 0.9
 -11 -8 -1 10.53 0.95
 11 8 -1 10.32 0.9
 -11 -8 -1 11.71 0.93
 -11 -9 1 0.07 0.78
 -11 9 -1 -0.79 0.71
 11 9 1 -0.97 1.11
 11 -9 -1 0.68 0.71
 -11 -9 1 0.61 0.76
 -11 9 -1 1.59 0.71
 11 9 1 1.19 0.82
 -11 9 -1 0.12 0.68
 -11 -9 1 1.36 0.82
 11 9 1 1.42 0.85
 11 -9 -1 0.57 0.76
 -11 -9 1 0.51 0.98
 -11 9 1 -0.3 0.71
 11 -9 1 -0.34 0.74
 -11 9 1 0.35 0.65
 11 9 -1 1.74 0.82
 11 -9 1 0.1 0.66
 -11 -9 -1 0.43 0.74
 11 9 -1 1.2 0.78
 -11 9 1 -0.68 0.72
 11 9 -1 -0.03 0.78
 -11 -9 -1 1.93 1.5
 -11 -9 -1 0.41 0.86
 -11 -9 -1 0.27 0.83
 11 10 1 5.26 0.99
 -11 -10 1 4.15 0.9
 11 10 1 2.85 0.9
 -11 -10 1 2.36 0.87
 -11 10 -1 4.33 0.82
 -11 -10 1 4.71 0.91
 -11 -10 1 2.89 0.87
 11 -10 -1 4.42 0.86
 -11 10 -1 3.97 0.79
 -11 10 -1 3.31 1.33
 -11 10 1 2.96 0.76
 11 10 -1 5.43 0.96
 -11 -10 -1 3.68 0.97
 11 10 -1 1.98 0.94
 -11 10 1 4.19 0.87
 -11 -10 -1 2.35 0.87
 -11 -10 -1 3.46 0.94
 11 -10 1 3.41 0.79
 11 -10 1 3.76 0.87
 -11 10 1 3.18 0.85
 11 10 -1 4.02 0.91
 -11 -11 1 1.85 0.92
 -11 -11 1 3.67 0.97
 -11 -11 1 1.96 0.9
 -11 11 -1 4.08 0.85
 -11 -11 1 3.45 1.06
 11 11 1 2.96 1.03
 11 -11 -1 2.03 0.9
 11 11 1 2.14 0.94
 11 -11 -1 3.44 0.89
 -11 11 -1 1.29 0.89
 11 11 1 1.94 0.94
 -11 -11 -1 1 0.79
 11 11 -1 3.59 1.01
 11 -11 1 2 0.86
 -11 11 1 1.43 0.87
 11 11 -1 3.52 0.97
 -11 -11 -1 0.82 0.9
 11 -11 1 2.77 0.87
 -11 -11 -1 3.13 1
 -11 11 1 2.91 0.83
 -11 -11 -1 1.91 0.95
 -11 11 1 2.74 0.91
 11 11 -1 3.67 0.98
 11 12 1 0.03 1.15
 -11 -12 1 -0.52 1.06
 11 12 1 0.98 0.97
 -11 -12 1 0.26 0.9
 -11 12 -1 -1.53 0.89
 11 -12 -1 0.48 0.95
 -11 -12 1 0.58 1.03
 11 -12 -1 1.35 0.93
 11 12 1 -0.6 0.94
 -11 12 -1 0.56 0.93
 11 -12 1 1.65 0.9
 -11 12 1 1.24 0.82
 -11 -12 -1 2.39 0.98
 11 -12 1 -1.6 0.93
 11 12 -1 0.45 1.11
 -11 12 1 1.07 0.99
 -11 -12 -1 -0.19 0.97
 -11 -12 -1 1.18 1.14
 -11 -12 -1 0.24 0.85
 11 12 -1 0.16 0.96
 -11 12 1 -0.14 0.91
 11 12 -1 -0.11 0.98
 11 13 1 2.14 1.13
 11 -13 -1 0.76 1.01
 11 13 1 1.75 1.09
 -11 -13 1 0.24 0.9
 -11 13 -1 -1.2 1.04
 11 -13 -1 1.45 0.99
 -11 13 -1 0.58 0.98
 11 13 1 0.5 0.92
 -11 -13 1 0.36 1.08
 11 -13 1 1.98 1.01
 11 13 -1 0.39 1.13
 11 13 -1 -0.64 1.02
 -11 -13 -1 -0.33 1.11
 -11 -13 -1 -0.75 0.92
 -11 -13 -1 -0.1 1.07
 -11 -13 -1 1.36 0.99
 11 -13 1 -0.97 0.92
 -11 13 1 1.32 1.03
 -11 13 1 1.93 0.93
 -11 13 1 1.15 1.04
 11 13 -1 -1.16 1.05
 -11 -14 1 1.3 1.01
 -11 14 -1 0.25 1.04
 11 14 1 0.55 1.16
 -11 14 -1 1.62 1.13
 11 -14 -1 0.02 1.1
 -11 14 -1 -1.62 1.17
 11 14 1 2.89 1.43
 11 14 1 -0.52 1.21
 -11 -14 1 -0.08 1.18
 11 -14 -1 -0.27 1.02
 -11 -14 1 1.17 1.27
 -11 14 1 0.83 1
 11 14 -1 2.97 2.19
 -11 -14 -1 2.06 1.24
 -11 -14 -1 -0.12 1.08
 11 14 -1 1.01 1.18
 -11 14 1 2.73 1.13
 -11 -14 -1 -1.6 1.21
 -12 0 -1 0.76 0.45
 -12 0 1 0.37 0.49
 -12 0 -1 0.21 0.41
 -12 1 -1 27.4 1.16
 -12 -1 1 29.55 1.05
 -12 1 -1 27.35 1.03
 -12 -1 1 29.89 1.3
 -12 1 1 25.62 0.98
 -12 1 1 28.18 1.21
 -12 -1 -1 29.12 1.3
 -12 -1 -1 27.04 1.08
 -12 -2 1 10.65 0.81
 -12 2 -1 7.99 0.58
 -12 -2 1 10.16 0.59
 -12 -2 1 8.93 0.64
 12 2 1 9.63 0.65
 -12 2 -1 8.47 0.71
 -12 -2 -1 10.38 0.87
 -12 2 1 9.52 0.68
 -12 2 1 8.63 0.6
 12 2 -1 9.28 0.82
 -12 -2 -1 8.7 0.69
 12 3 1 67.12 1.83
 12 3 1 65.21 2.02
 -12 3 -1 70.47 1.91
 -12 -3 1 68.76 1.89
 -12 -3 1 74.02 2.23
 -12 3 -1 67.44 1.97
 -12 -3 1 69.58 1.88
 -12 -3 -1 72.46 2.21
 -12 -3 -1 71.87 2.04
 12 3 -1 69.25 2
 -12 3 1 67.15 1.86
 -12 3 1 67.99 1.99
 12 3 -1 69.6 1.87
 -12 -3 -1 69.35 1.84
 -12 -3 -1 67.23 1.85
 -12 -4 1 6.74 0.72
 -12 -4 1 6.42 0.65
 12 4 1 7.11 0.67
 -12 -4 1 7.57 0.6
 12 4 1 6.54 0.56
 -12 -4 1 6.24 0.55
 -12 -4 -1 7.32 0.59
 -12 -4 -1 6.79 0.68
 -12 -4 -1 5.72 0.72
 12 4 -1 6.75 0.6
 12 4 -1 5.58 0.62
 12 4 -1 7.17 0.59
 12 5 1 46.38 1.55
 -12 -5 1 48.49 1.53
 -12 -5 1 50.11 1.91
 12 5 1 47.62 1.52
 12 5 1 48.66 1.68
 -12 -5 1 46.34 1.57
 -12 -5 -1 46.78 1.54
 -12 -5 -1 45.86 1.52
 -12 5 1 44.29 1.4
 12 5 -1 47.69 1.57
 12 5 -1 49.15 1.54
 12 5 -1 47.62 1.64
 -12 -5 -1 49.62 1.71
 -12 -6 1 20.55 1.31
 -12 6 -1 18.57 0.9
 12 6 1 18.62 1.11
 -12 -6 1 17.51 1.17
 12 6 1 19.62 1.26
 -12 -6 1 21.27 1.59
 12 6 1 18.36 1.17
 -12 -6 1 17.5 1.11
 12 -6 -1 17.16 1
 -12 6 1 17.27 1
 -12 6 1 18.06 0.97
 12 6 -1 19.7 1.24
 12 6 -1 18.79 1.16
 -12 -6 -1 17.1 1.14
 -12 -6 -1 20.2 1.32
 -12 -6 -1 17.56 1.11
 12 6 -1 18.96 1.11
 12 -6 1 19.44 0.94
 -12 7 -1 14.48 0.96
 12 7 1 14.68 1.3
 12 -7 -1 11.5 0.98
 -12 7 -1 12.09 0.97
 12 -7 -1 12.31 1.06
 12 7 1 11.96 0.86
 12 7 1 12.82 0.9
 -12 -7 1 12.9 0.89
 -12 -7 1 13.73 0.92
 -12 -7 1 12.02 0.92
 12 7 -1 12.02 0.89
 -12 7 1 12.9 0.98
 -12 -7 -1 11.91 1.03
 -12 -7 -1 13.67 1.13
 12 7 -1 11.47 0.89
 -12 -7 -1 11.8 0.96
 12 -7 1 13.98 1.01
 12 7 -1 12.37 0.88
 -12 7 1 13.51 1.03
 -12 -7 -1 13.52 1.17
 -12 -8 1 9.58 0.92
 12 8 1 9.5 0.94
 -12 -8 1 9.6 0.96
 12 -8 -1 10.26 0.78
 -12 -8 1 11.48 0.91
 -12 8 -1 10.55 0.79
 -12 8 -1 12.1 1.04
 12 8 1 9.69 0.92
 -12 -8 1 11.68 0.92
 12 -8 -1 11.41 0.84
 -12 8 1 9.61 0.77
 12 8 -1 10.69 0.92
 12 8 -1 9.75 0.94
 12 -8 1 10.79 0.78
 -12 -8 -1 9.68 0.89
 -12 8 1 10.12 0.76
 -12 8 1 8.72 0.79
 -12 -8 -1 11.46 0.95
 -12 -8 -1 9.72 0.98
 -12 -9 1 16.32 1.19
 12 -9 -1 13.78 1.15
 -12 -9 1 13.85 1.1
 -12 9 -1 16.45 1.27
 -12 9 -1 15.57 1.21
 12 -9 -1 15.46 1.18
 12 9 1 18.07 1.37
 12 9 1 13.38 1.07
 -12 -9 1 16.97 1.43
 -12 9 1 13.28 1.2
 12 -9 1 16.55 1.14
 -12 -9 -1 13.79 1.03
 12 -9 1 18.07 1.29
 -12 9 1 15.56 1.27
 -12 -9 -1 14.9 1.09
 12 9 -1 12.52 1.66
 -12 -9 -1 14.92 1.31
 12 9 -1 14.6 1.04
 -12 9 1 17.02 1.25
 12 9 -1 16.74 1.45
 -12 -9 -1 15.12 1.34
 -12 -10 1 11.51 1.09
 -12 10 -1 15.42 1.31
 12 -10 -1 14.23 1.08
 -12 -10 1 13.45 1.09
 -12 -10 1 11.72 1.09
 -12 -10 1 14.19 1.09
 12 10 1 13.73 1.12
 -12 10 -1 15.78 1.3
 12 10 1 13.53 1.1
 -12 10 -1 11.83 0.98
 12 10 1 12.88 1.09
 12 -10 -1 14.73 1.3
 -12 10 1 14.17 1
 12 10 -1 11.17 1.04
 -12 -10 -1 13.92 1.12
 -12 10 1 12.71 0.99
 -12 10 1 11.91 0.93
 -12 -10 -1 11.04 1.09
 12 10 -1 15.4 1.11
 12 -10 1 11.84 0.93
 12 -11 -1 4.17 0.95
 -12 -11 1 1.82 1.02
 12 11 1 1.65 1.03
 -12 -11 1 2.67 1.01
 -12 -11 1 4.76 1.01
 -12 11 -1 3.63 0.87
 -12 11 -1 1.89 0.86
 12 -11 -1 3.04 0.88
 12 11 1 3.29 0.98
 12 11 1 3.53 1.02
 -12 -11 1 3.47 0.98
 12 11 -1 2.03 0.95
 12 11 -1 4.06 1
 -12 11 1 4.4 0.9
 -12 11 1 4.31 0.85
 12 -11 1 4.84 0.9
 -12 11 1 4.3 0.92
 12 -11 1 3.33 0.93
 -12 -11 -1 4.36 1.01
 -12 -11 -1 2.16 0.99
 12 11 -1 3.41 1.06
 -12 -12 1 -0.42 0.99
 -12 -12 1 0.56 1.08
 -12 -12 1 -0.27 1
 -12 12 -1 0.66 0.89
 12 -12 -1 0.54 0.91
 12 12 1 1.11 1.03
 12 12 1 0.35 0.94
 -12 12 -1 0.67 0.99
 12 -12 -1 1.14 0.99
 -12 -12 1 0.15 0.92
 12 12 -1 -0.92 1
 12 12 -1 -0.44 1.06
 -12 -12 -1 -0.14 1.12
 -12 -12 -1 1.85 1.03
 -12 12 1 -0.29 0.9
 -12 12 1 1.44 1
 12 -12 1 2.62 0.99
 12 12 -1 0.71 1.01
 12 -12 1 2.02 0.88
 -12 -12 -1 -1.59 0.98
 -12 12 1 1.06 0.86
 -12 -12 -1 0.46 1.04
 -12 -13 1 4.74 1.21
 12 13 1 4.4 1.17
 -12 -13 1 3.95 1.05
 -12 13 -1 1.72 0.94
 12 13 1 4.15 1.2
 12 13 1 2.99 1.2
 -12 13 -1 2.2 1.05
 -12 13 -1 4.92 1.02
 -12 -13 1 3.87 1.24
 12 -13 -1 3.66 1.05
 12 -13 -1 3.13 1.09
 -12 -13 -1 3.33 1.16
 -12 -13 -1 5.17 1.21
 12 13 -1 4.25 1.15
 12 13 -1 3.15 1.14
 -12 13 1 2.61 0.95
 12 -13 1 4.7 1.14
 -12 13 1 1.98 1.08
 -12 13 1 4.92 1.07
 12 13 -1 3.44 1.21
 -12 -13 -1 2.7 1.11
 12 -14 -1 -0.42 1.23
 -12 14 -1 0.91 1.09
 12 14 1 0.16 1.26
 -12 14 -1 1.68 1.06
 12 -14 -1 1.37 1.11
 -12 -14 1 3.33 1.24
 -12 -14 1 -0.03 1.23
 -12 14 -1 2 1.18
 12 14 1 0.73 1.27
 12 14 1 3.87 1.35
 -12 14 1 1.65 1.17
 -12 14 1 1.48 1.08
 12 14 -1 3.26 1.22
 -12 14 1 0.08 1
 12 -14 1 2.88 1.16
 12 14 -1 0.42 1.5
 -12 -14 -1 0.72 1.34
 -12 -14 -1 2.23 1.31
 -12 -14 -1 1.52 1.13
 12 14 -1 3.39 1.23
 -13 0 -1 1.08 0.49
 -13 0 -1 0.37 0.44
 -13 -1 1 2.12 0.6
 -13 1 -1 1.74 0.44
 -13 1 -1 1.45 0.49
 -13 -1 1 2.02 0.46
 -13 -1 -1 1.91 0.48
 -13 -2 1 3 0.62
 -13 -2 1 4.01 0.53
 -13 2 -1 4.04 0.53
 -13 2 -1 3.87 0.47
 -13 -2 -1 4.55 0.64
 -13 2 1 4.04 0.46
 -13 2 1 3.11 0.53
 -13 3 -1 0.67 0.48
 13 3 1 0.77 0.56
 -13 3 -1 1.03 0.44
 -13 -3 1 2.31 0.6
 -13 -3 1 1.51 0.47
 -13 -3 -1 1.39 0.63
 -13 3 1 1.33 0.39
 -13 -3 -1 1.72 0.56
 13 3 -1 0.92 0.53
 -13 3 1 1.28 0.49
 13 3 -1 0.84 0.38
 -13 4 -1 5.42 0.52
 13 4 1 5.08 0.53
 -13 -4 1 3.84 0.69
 -13 -4 1 4.54 0.58
 13 4 1 4.61 0.65
 -13 -4 1 5.22 0.55
 -13 4 1 5.52 0.48
 -13 -4 -1 5.75 0.56
 -13 -4 -1 6.31 0.7
 -13 -4 -1 4.41 0.76
 13 4 -1 5.88 0.63
 -13 -4 -1 4.89 0.57
 13 4 -1 5 0.56
 -13 -5 1 6.98 0.77
 -13 -5 1 6.11 0.69
 -13 -5 1 7.4 0.64
 13 5 1 6.85 0.75
 13 5 1 8 0.69
 -13 -5 1 5.93 0.82
 13 5 1 7 0.64
 -13 -5 -1 6.66 0.78
 -13 5 1 6.92 0.54
 -13 -5 -1 6.09 0.63
 -13 -5 -1 7.78 0.66
 13 5 -1 7.46 0.73
 13 5 -1 7.92 0.71
 13 5 -1 7.41 0.67
 -13 -5 -1 6.41 0.81
 -13 -6 1 -0.71 0.7
 13 6 1 -0.84 0.67
 13 -6 -1 0.56 0.39
 13 6 1 -0.3 0.59
 13 6 1 -0.12 0.64
 13 -6 -1 -0.83 0.53
 -13 -6 1 -0.02 0.65
 -13 -6 1 0.38 0.88
 -13 -6 1 -0.09 0.62
 -13 6 -1 0.75 0.47
 -13 -6 -1 0.22 0.62
 -13 -6 -1 -0.33 0.62
 -13 6 1 0.31 0.38
 13 6 -1 0.06 0.65
 -13 6 1 -0.18 0.48
 13 6 -1 0.61 0.66
 -13 -6 -1 0.49 0.73
 -13 -6 -1 -0.85 0.85
 13 6 -1 -0.26 0.61
 -13 6 1 1.01 0.86
 -13 7 -1 0.95 0.55
 13 -7 -1 0.4 0.62
 -13 -7 1 0.79 0.72
 13 7 1 0.92 0.71
 -13 -7 1 -0.11 0.71
 13 7 1 1.1 0.7
 -13 -7 1 -0.29 0.68
 -13 -7 1 2.16 0.79
 13 7 1 1.3 0.73
 -13 7 1 0.98 0.58
 13 7 -1 1.03 0.71
 -13 7 1 0.54 0.35
 -13 -7 -1 1.32 0.71
 -13 -7 -1 0.64 0.73
 13 -7 1 0.97 0.56
 13 7 -1 -0.14 0.72
 -13 -7 -1 0.02 0.79
 -13 -7 -1 0.99 0.67
 -13 7 1 0.64 0.59
 13 7 -1 0.23 0.69
 -13 -8 1 1.04 0.82
 -13 -8 1 0.25 0.85
 -13 -8 1 0.94 0.9
 13 -8 -1 1.34 0.62
 13 -8 -1 0.75 0.71
 -13 8 -1 1.24 0.6
 13 8 1 -0.65 0.79
 -13 -8 1 2.14 0.81
 -13 8 -1 0.55 0.62
 13 8 1 1.85 1.17
 13 8 -1 1.95 0.77
 13 -8 1 1.61 0.66
 -13 -8 -1 0.27 0.75
 -13 8 1 0.56 0.61
 13 8 -1 0.23 0.77
 -13 -8 -1 1.57 0.8
 -13 8 1 1.43 0.64
 -13 -8 -1 0.36 0.87
 13 8 -1 0.89 0.78
 -13 8 1 0.99 0.65
 13 9 1 -1.3 0.74
 -13 9 -1 0 0.66
 -13 9 -1 -0.63 0.69
 -13 -9 1 1.95 0.93
 13 -9 -1 0.21 0.69
 13 -9 -1 0.13 0.86
 -13 -9 1 1.38 0.84
 -13 -9 1 0.49 0.82
 -13 -9 1 0.7 0.83
 13 9 1 0.06 0.87
 13 9 1 -0.8 0.83
 -13 -9 -1 1.22 0.84
 13 -9 1 0.88 0.86
 13 9 -1 1.2 0.85
 13 9 -1 -1.24 0.77
 -13 -9 -1 -0.84 0.81
 -13 -9 -1 -0.22 0.81
 -13 9 1 0.47 0.66
 -13 9 1 -0.12 0.73
 -13 -9 -1 1.45 0.87
 13 10 1 4.12 0.99
 13 10 1 1.51 0.86
 -13 -10 1 3.05 0.96
 13 -10 -1 1.92 0.83
 -13 10 -1 3.52 0.81
 13 10 1 2.73 0.95
 -13 -10 1 1.85 0.96
 -13 10 -1 1.92 0.8
 -13 10 -1 1.6 0.74
 13 -10 -1 2.52 0.83
 -13 -10 1 0.57 0.91
 13 10 -1 1.95 0.92
 -13 10 1 1.97 0.8
 13 10 -1 1.52 0.94
 -13 10 1 2.64 0.8
 -13 -10 -1 1 0.91
 -13 -10 -1 0.69 0.91
 -13 -10 -1 0.56 0.97
 13 -10 1 2.51 0.79
 13 10 -1 3.45 0.97
 -13 -10 -1 1.89 0.92
 13 -10 1 2.45 0.8
 -13 11 -1 1.5 0.81
 -13 -11 1 0.78 1.01
 13 -11 -1 0.75 0.84
 13 11 1 2.61 1.07
 -13 -11 1 1.46 0.93
 -13 -11 1 1.43 0.93
 13 -11 -1 1.41 0.9
 -13 11 -1 0.02 0.85
 -13 11 -1 0 0.84
 13 11 1 1 0.92
 13 11 -1 -1.19 1.07
 13 11 -1 0.26 0.97
 -13 11 1 1.09 0.89
 -13 11 1 0.64 0.88
 13 -11 1 1.41 0.86
 -13 -11 -1 1.26 1.03
 -13 -11 -1 -0.19 0.89
 -13 -11 -1 -0.6 0.97
 13 -12 -1 -1.15 0.93
 -13 -12 1 -0.87 1
 13 12 1 0.33 1
 -13 -12 1 1.49 1.06
 13 12 1 0.09 1.01
 13 12 1 0.75 1.14
 -13 -12 1 1.02 1.12
 -13 -12 1 -0.07 1.04
 -13 12 -1 -1.12 0.87
 -13 12 -1 -1.63 0.88
 -13 12 -1 -0.37 0.87
 -13 -12 -1 0.54 0.99
 -13 12 1 0.1 0.94
 -13 -12 -1 -1.03 1.06
 -13 -12 -1 -1.11 1.01
 13 12 -1 -0.18 1.04
 13 -12 1 1.88 0.91
 13 -12 1 1.22 0.89
 13 12 -1 -1.33 1.1
 -13 -12 -1 -1.49 1
 13 12 -1 -1.1 1.01
 -13 12 1 1.76 1.03
 -13 13 -1 1.69 0.99
 -13 -13 1 -0.56 1.21
 13 13 1 -1.26 1.1
 -13 -13 1 0.6 1.08
 13 13 1 0.53 1.28
 -13 -13 1 0.41 1.05
 13 13 1 -1.6 1.04
 -13 13 -1 1.76 0.99
 -13 13 -1 1.65 1.04
 -13 -13 1 -0.17 1.12
 13 -13 1 1.91 1
 -13 -13 -1 -1.62 1.06
 -13 -13 -1 -0.86 1.07
 13 13 -1 -1.48 1.13
 -13 -13 -1 -1.87 1.1
 -13 13 1 1.43 1.04
 13 13 -1 -2.02 1.17
 13 -13 1 -1.29 0.96
 13 13 -1 -1.61 1.19
 -13 13 1 -0.96 0.91
 -13 13 1 -0.92 1.02
 -14 0 -1 0.68 0.47
 -14 0 -1 1.49 0.57
 -14 0 1 1.41 0.56
 -14 1 -1 0.35 0.51
 -14 -1 1 0.35 0.48
 -14 -1 1 0.63 0.61
 -14 1 -1 0.02 0.44
 -14 -1 -1 0.63 0.5
 -14 1 1 0.72 0.44
 -14 -1 -1 0.71 0.56
 -14 1 1 1.49 0.54
 -14 -2 1 1.14 0.51
 -14 2 -1 1.23 0.45
 -14 -2 1 1.45 0.65
 -14 2 -1 0.75 0.53
 -14 -2 -1 1.81 0.62
 -14 -2 -1 2.2 0.57
 -14 3 -1 -0.71 0.49
 -14 -3 1 0.1 0.44
 14 3 1 0.04 0.57
 -14 -3 1 0.56 0.67
 -14 -3 1 0.69 0.58
 -14 3 -1 -0.39 0.43
 -14 -3 -1 0.95 0.7
 14 3 -1 -0.76 0.54
 -14 -3 -1 0.57 0.58
 -14 3 1 -0.14 0.42
 -14 4 -1 19.1 0.95
 -14 4 -1 17.23 1.06
 14 4 1 18.21 0.89
 -14 -4 1 20.25 1.56
 -14 -4 1 17.63 0.99
 14 4 1 19.12 0.89
 14 4 1 18.65 1.22
 -14 -4 1 18.45 0.94
 -14 -4 -1 17.44 0.94
 -14 4 1 18.71 0.89
 -14 -4 -1 17.6 0.91
 14 4 -1 16.81 0.95
 14 4 -1 19.18 1.16
 14 5 1 2.13 0.68
 -14 5 -1 0.44 0.46
 14 5 1 2.35 0.55
 -14 -5 1 1.29 0.54
 -14 -5 1 1.57 0.71
 -14 -5 -1 2.2 0.6
 -14 -5 -1 2.46 0.74
 14 5 -1 1.52 0.64
 14 5 -1 0.87 0.58
 -14 5 1 1.14 0.47
 -14 -5 -1 0.9 1.21
 -14 -5 -1 1.26 0.53
 -14 5 1 0.96 0.45
 14 6 1 0.43 0.61
 -14 -6 1 -0.18 0.73
 14 6 1 0 0.7
 -14 -6 1 -0.22 0.75
 14 6 1 1.15 0.64
 -14 -6 1 -0.01 0.62
 -14 -6 1 -0.78 0.65
 14 6 -1 -0.12 0.65
 -14 6 1 0.05 0.49
 14 6 -1 -0.41 0.63
 -14 -6 -1 0.11 0.65
 14 6 -1 -0.76 0.67
 -14 6 1 -0.79 0.38
 -14 -6 -1 0.16 0.79
 -14 -6 -1 -0.2 0.61
 -14 -7 1 9.34 0.95
 14 7 1 9.34 0.97
 -14 7 -1 7.85 0.64
 -14 -7 1 8.71 0.85
 -14 7 -1 7.83 0.64
 14 7 1 7.51 0.88
 14 -7 -1 8.61 0.7
 -14 -7 1 6.12 0.79
 14 7 -1 8.47 0.86
 -14 7 1 7.1 0.65
 -14 -7 -1 7.62 0.94
 14 7 -1 7.19 0.83
 -14 -7 -1 8.82 0.84
 -14 -7 -1 6.96 0.79
 -14 7 1 6.91 0.48
 -14 -7 -1 7.78 0.96
 -14 -8 1 33.62 1.8
 14 8 1 33.12 1.54
 -14 -8 1 30.5 1.58
 14 8 1 29.37 1.57
 -14 8 -1 33.99 1.88
 -14 8 -1 31.96 1.29
 14 -8 -1 31.32 1.38
 14 8 1 29.16 1.67
 -14 -8 1 31.52 1.52
 -14 -8 -1 35.37 2.03
 -14 -8 -1 31.7 2.14
 -14 8 1 35.01 1.35
 14 8 -1 30.91 1.6
 14 8 -1 34.25 1.55
 -14 -8 -1 33.34 1.52
 -14 -8 -1 31.17 1.55
 -14 8 1 33.46 1.41
 14 -8 1 31.24 1.32
 14 9 1 2.54 0.89
 -14 -9 1 3.97 0.96
 14 9 1 2.99 0.91
 14 -9 -1 3.94 0.73
 14 9 1 3.48 0.81
 -14 9 -1 3.33 0.71
 14 -9 -1 2.89 0.77
 -14 -9 1 4.64 0.88
 -14 -9 1 2.99 0.97
 14 9 -1 2.2 0.89
 -14 9 1 3.98 1.2
 14 9 -1 4.38 0.91
 -14 -9 -1 3.29 0.84
 -14 9 1 2.01 0.73
 -14 -9 -1 3.59 0.9
 14 9 -1 1.76 0.84
 -14 -9 -1 4.16 0.98
 -14 10 -1 2.2 0.77
 14 -10 -1 2.37 0.84
 14 10 1 2.94 0.98
 -14 -10 1 2.72 1.05
 -14 -10 1 3.64 0.93
 -14 10 -1 3.16 0.81
 -14 10 -1 1.53 0.8
 14 10 1 2.5 0.9
 14 -10 -1 2.41 0.8
 14 10 1 4.09 1.05
 -14 -10 1 2.75 0.95
 14 -10 1 2.04 0.77
 -14 -10 -1 3.26 1.06
 14 10 -1 0.7 0.95
 14 10 -1 4.65 0.97
 14 10 -1 1.19 1.02
 -14 -10 -1 3.42 0.96
 -14 10 1 2.33 0.78
 14 -10 1 1.24 0.84
 -14 -10 -1 1.46 0.94
 -14 10 1 3.49 0.82
 14 11 1 5.57 1.09
 -14 11 -1 3.22 1.06
 -14 11 -1 4.38 0.89
 14 -11 -1 3.21 0.94
 14 11 1 5.99 1.11
 14 11 1 4.02 0.99
 -14 11 1 3.89 0.86
 -14 -11 -1 3.93 1.07
 14 -11 1 2.93 0.94
 -14 -11 -1 5.38 1.1
 14 11 -1 2.46 1.04
 -14 -11 -1 4.06 1.1
 -14 -11 -1 2.95 1.08
 14 11 -1 4.41 0.99
 -14 11 1 4.1 0.9
 -14 12 -1 0.22 0.91
 14 12 1 -0.19 1.05
 -14 -12 1 0.43 1.14
 -14 -12 1 0.28 1.12
 -14 12 -1 0.14 0.92
 14 12 1 -1.52 1.07
 -14 -12 1 1.63 1.08
 14 12 1 1.22 1.18
 14 12 -1 0.57 1.05
 -14 12 1 -0.26 0.94
 -14 -12 -1 1.8 1.07
 -14 12 1 1.19 0.91
 14 12 -1 0.78 1.15
 14 -12 1 -0.77 0.93
 -14 -12 -1 0.39 1.04
 -14 12 1 -0.69 1.52
 -14 13 -1 5.57 1.07
 -14 13 -1 4.46 1.14
 -14 -13 1 2.11 1.31
 -14 -13 1 4.43 1.32
 14 -13 -1 6.58 1.15
 -14 -13 1 4.21 1.25
 14 -13 -1 4.39 1.19
 -14 13 -1 2.63 1.1
 -14 -13 -1 6.97 1.31
 14 13 -1 4.15 1.19
 -14 13 1 3.47 1.1
 -14 -13 -1 5.01 1.24
 -14 13 1 4.87 1.02
 14 -13 1 2.13 1.11
 -14 -13 -1 5.12 1.29
 -15 0 1 0.96 0.59
 -15 0 -1 0.57 0.58
 -15 1 -1 1.67 0.49
 -15 -1 1 2.38 0.66
 -15 1 -1 1.45 0.58
 -15 -1 1 1.37 0.51
 -15 -1 -1 2.91 0.67
 -15 1 1 1.3 0.49
 -15 -1 -1 1.9 0.56
 -15 1 1 2.12 0.6
 -15 2 -1 8.06 0.61
 -15 2 -1 6.97 0.68
 -15 -2 1 9.06 0.83
 -15 -2 1 9.13 0.67
 -15 2 1 7.5 0.58
 -15 -2 -1 6.68 0.74
 -15 -2 -1 8.28 0.73
 -15 2 1 7.44 0.68
 -15 -3 1 1.47 0.6
 -15 3 -1 0.42 0.52
 -15 -3 1 -0.4 0.71
 -15 3 -1 0.24 0.47
 -15 3 1 -0.63 0.54
 15 3 -1 1.14 0.59
 -15 3 1 -0.73 0.47
 -15 -3 -1 1.54 0.73
 15 4 1 2.1 0.67
 -15 -4 1 2.26 0.55
 -15 -4 1 1.71 0.61
 -15 4 -1 3.06 0.53
 -15 -4 1 3.13 0.94
 15 4 -1 1.29 0.53
 -15 -4 -1 3.34 0.71
 15 4 -1 1.91 0.63
 -15 -4 -1 2.49 0.47
 -15 -4 -1 1.34 1.3
 -15 4 1 2.56 0.48
 15 5 1 0.53 0.34
 -15 -5 1 -0.58 0.55
 -15 -5 1 -0.15 0.58
 -15 -5 1 0.27 0.71
 -15 -5 1 0.72 0.72
 -15 5 -1 0.86 0.49
 15 5 1 0.81 0.54
 15 5 1 -0.64 0.67
 15 5 -1 0.34 0.65
 15 5 -1 0.59 0.57
 -15 5 1 0.37 0.45
 -15 -5 -1 1.46 0.56
 -15 5 1 0.26 0.48
 -15 -5 -1 1.4 0.79
 -15 -5 -1 1.05 0.73
 -15 -6 1 1.37 0.61
 -15 -6 1 0.63 0.78
 15 6 1 0.71 0.72
 -15 -6 1 2.49 0.82
 15 6 1 1.24 0.66
 -15 -6 1 0.58 0.67
 15 6 -1 1.02 0.62
 15 6 -1 2.01 0.73
 -15 -6 -1 0.82 0.59
 -15 6 1 0.9 0.48
 15 6 -1 1.76 0.68
 -15 -6 -1 1.13 0.64
 -15 -6 -1 0.86 0.82
 -15 -6 -1 1.64 0.85
 -15 -7 1 -0.04 0.76
 15 7 1 1.01 0.73
 15 7 1 0.77 1.35
 -15 -7 1 -0.69 0.77
 -15 -7 1 -0.55 0.81
 -15 -7 1 0.21 0.65
 15 7 1 1.15 0.71
 -15 -7 -1 0.46 0.66
 15 7 -1 1.42 0.71
 15 7 -1 -0.8 0.72
 15 7 -1 0.62 0.76
 -15 -7 -1 1.22 0.85
 -15 -7 -1 -1.13 0.89
 -15 7 1 0.27 0.39
 -15 7 1 0.75 0.51
 -15 -7 -1 -0.43 1.19
 -15 -8 1 2.23 0.76
 15 8 1 3.37 0.8
 15 8 1 3.27 0.83
 -15 -8 1 3.49 0.83
 -15 -8 1 1.86 0.98
 -15 -8 1 1.8 1.01
 15 -8 -1 1.93 0.49
 15 8 1 3.44 0.9
 -15 8 -1 3.87 0.61
 -15 -8 -1 2.59 0.97
 -15 -8 -1 3.14 0.83
 -15 -8 -1 3.13 0.77
 15 8 -1 3.34 0.8
 -15 8 1 2.12 0.66
 15 8 -1 2.26 0.84
 -15 8 1 3.33 0.63
 -15 9 -1 2.01 1.01
 -15 -9 1 0.11 0.95
 15 9 1 -0.84 0.86
 15 9 1 -0.85 0.85
 -15 9 -1 2.81 1.22
 15 9 1 1.63 0.85
 -15 -9 1 -0.11 0.86
 -15 -9 1 1.11 1.02
 -15 9 1 1.78 0.7
 -15 -9 -1 0.58 0.88
 15 9 -1 0.47 0.86
 15 9 -1 -0.31 0.89
 15 9 -1 2.1 0.89
 -15 -9 -1 -1.25 0.9
 -15 -9 -1 -0.55 0.94
 -15 9 1 -0.66 0.68
 -15 -9 -1 1.16 0.82
 15 -9 1 0.7 0.85
 -15 -10 1 0.31 1.02
 -15 -10 1 -0.07 0.92
 -15 -10 1 2.2 1.06
 15 -10 -1 2.05 0.82
 -15 10 -1 1.21 0.81
 -15 10 -1 0.39 0.74
 15 10 1 2.91 0.96
 15 -10 -1 0.74 0.74
 -15 10 -1 0.23 0.72
 15 10 1 1.3 0.97
 15 10 -1 2.81 0.97
 -15 10 1 1.2 0.73
 -15 -10 -1 0.93 0.91
 -15 10 1 1.16 0.75
 -15 -10 -1 1.64 1.01
 15 -10 1 -0.66 0.77
 15 10 -1 0.27 0.92
 -15 -10 -1 1.56 0.94
 15 10 -1 0.68 0.9
 -15 -11 1 1.32 1.1
 15 11 1 2.46 1.02
 -15 -11 1 -0.62 1.05
 15 -11 -1 1.08 0.81
 -15 -11 1 0.11 0.98
 -15 11 -1 1.51 0.87
 15 -11 -1 2.11 0.9
 -15 -11 1 2.77 1.03
 15 11 1 1.64 1.07
 15 11 1 0.6 1.03
 -15 11 -1 -0.29 0.83
 -15 11 1 0.2 0.81
 15 -11 1 1.82 0.85
 -15 -11 -1 1.94 1.04
 -15 -11 -1 -0.11 1.12
 15 11 -1 2.06 1.1
 15 11 -1 0.92 1.02
 -15 11 1 0.79 0.89
 15 11 -1 -0.2 0.99
 -15 11 1 1.33 0.81
 15 -11 1 -0.07 0.86
 15 12 1 1.1 1.14
 -15 12 -1 0.19 0.96
 15 -12 -1 -1.29 0.95
 -15 12 -1 -1.28 0.95
 15 12 1 -0.8 1.09
 -15 -12 1 0.86 1.05
 15 12 1 1.81 1.15
 -15 12 1 -0.63 1.64
 15 12 -1 -0.45 1.09
 15 -12 1 -0.36 1
 -15 -12 -1 2.32 1.18
 -15 -12 -1 -0.58 1.07
 -15 -12 -1 0.27 1.05
 -15 12 1 1.42 0.94
 15 12 -1 -1.45 1.1
 15 12 -1 2.07 1.22
 15 -12 1 1.79 0.97
 -15 12 1 1.86 0.97
 -16 0 1 0.27 0.61
 -16 0 -1 -0.88 0.59
 -16 0 -1 0.1 0.54
 -16 1 -1 0.17 0.59
 -16 -1 1 1.23 0.54
 -16 1 -1 1.01 0.54
 -16 1 1 1 0.64
 -16 -1 -1 1.35 0.67
 -16 1 1 1.77 0.51
 -16 -1 -1 1.52 0.59
 -16 -2 1 24.16 1.56
 -16 2 -1 19.85 1.3
 -16 2 -1 22.33 1.09
 -16 2 1 20.59 1.33
 -16 -2 -1 24.91 1.56
 -16 -2 -1 22.42 1.24
 -16 -3 1 1.43 0.81
 -16 3 -1 1.97 0.61
 -16 -3 1 3.5 0.67
 -16 3 -1 3.01 0.58
 -16 -3 -1 3.26 0.69
 -16 3 1 1.46 0.61
 -16 -3 -1 1.58 0.75
 -16 3 1 2.64 0.51
 -16 -4 1 2.06 0.86
 -16 -4 1 1.42 0.46
 -16 4 -1 1.11 0.57
 16 4 1 1.63 0.68
 -16 -4 1 2.37 0.53
 -16 4 -1 1.4 0.52
 -16 -4 -1 1.84 0.72
 -16 4 1 1.12 0.5
 -16 -4 -1 0.83 0.81
 16 4 -1 0.2 0.67
 -16 -5 1 8.22 0.98
 -16 5 -1 7.09 0.64
 -16 -5 1 8.07 0.95
 16 5 1 8.13 0.63
 16 5 1 8.36 0.66
 16 5 1 8.1 0.84
 -16 -5 1 8.76 0.88
 -16 -5 1 8.9 0.72
 -16 -5 -1 8.94 0.62
 -16 -5 -1 9.1 0.69
 -16 -5 -1 8.02 1
 16 5 -1 7.16 0.82
 -16 5 1 7.27 0.59
 -16 -5 -1 9.08 0.9
 16 5 -1 8.4 0.69
 16 6 1 4.95 0.84
 16 6 1 3.68 0.65
 -16 -6 1 5.66 0.73
 -16 -6 1 3.57 0.95
 -16 -6 1 2.95 0.87
 -16 -6 1 4.71 0.66
 -16 6 -1 4.11 0.59
 -16 -6 -1 2.84 0.89
 -16 6 1 3.73 0.55
 16 6 -1 5.8 1.08
 16 6 -1 4.76 0.84
 -16 -6 -1 4.06 0.59
 16 6 -1 4.99 0.77
 -16 -6 -1 4.21 0.7
 -16 -6 -1 3.28 0.87
 16 7 1 6.19 0.79
 -16 -7 1 4.79 0.96
 -16 -7 1 4.48 0.72
 -16 -7 1 5.27 0.92
 -16 -7 1 4.7 0.79
 16 7 1 5.81 0.89
 16 7 1 5.18 0.74
 -16 -7 -1 4.08 0.7
 -16 -7 -1 5.72 0.79
 16 7 -1 5.77 0.79
 16 7 -1 3.01 1.48
 16 7 -1 3.73 0.75
 -16 -7 -1 5.73 0.99
 16 8 1 6.37 0.95
 -16 -8 1 4.48 0.81
 16 8 1 6.96 0.87
 -16 -8 1 3.94 1.01
 -16 -8 1 3.96 1.06
 -16 -8 1 5.56 0.87
 16 8 1 5.93 0.88
 -16 -8 -1 4.58 0.79
 -16 8 1 5.21 0.63
 -16 8 1 6.69 0.73
 16 8 -1 5.42 0.88
 -16 -8 -1 4.69 0.86
 -16 8 1 5.21 0.65
 16 8 -1 5.62 0.84
 -16 -8 -1 7.26 1.08
 -16 -8 -1 4.3 1.02
 16 -9 -1 0.1 0.67
 -16 -9 1 -1.25 0.79
 -16 -9 1 0.27 0.84
 16 9 1 0.73 0.88
 -16 -9 1 0.96 1
 -16 9 -1 1.48 1.03
 -16 -9 1 -0.26 0.96
 16 9 1 -0.25 0.82
 16 9 1 -1.27 0.89
 -16 9 1 -0.9 0.71
 -16 -9 -1 -0.12 0.8
 -16 -9 -1 1.81 1.03
 -16 -9 -1 -0.68 0.82
 16 9 -1 1.4 0.82
 16 9 -1 -0.41 0.9
 -16 -9 -1 -0.41 1.02
 -16 9 1 0.73 0.63
 16 9 -1 -0.48 0.88
 -16 10 -1 7 0.85
 16 10 1 9.78 1.11
 -16 -10 1 7.38 1.05
 16 -10 -1 9.07 0.85
 16 10 1 8.4 1.02
 -16 -10 1 9.82 1.09
 -16 -10 1 8.74 1.31
 -16 10 -1 8.88 0.96
 -16 10 1 7.52 0.82
 16 -10 1 7.65 0.86
 16 10 -1 7.55 1.05
 16 10 -1 7.71 1.12
 -16 10 1 8.25 0.9
 -16 10 1 9.44 0.88
 -16 -10 -1 6.33 1.21
 -16 -10 -1 8.51 0.99
 16 10 -1 9.54 1.13
 -16 -10 -1 7.82 1.04
 16 11 1 2.22 1.17
 -16 11 -1 1.65 0.87
 -16 -11 1 0.45 1.17
 -16 -11 1 2.62 1.05
 -16 -11 1 0.92 1.04
 -16 -11 1 1.26 1.01
 16 -11 -1 1.6 0.87
 16 11 1 -0.89 1.09
 -16 11 -1 2.44 0.87
 16 11 1 3.33 1.03
 16 11 -1 2.05 1.06
 -16 -11 -1 -0.89 0.98
 -16 11 1 0.48 0.85
 -16 -11 -1 -0.25 0.99
 -16 11 1 -0.38 0.85
 16 11 -1 0.93 1.16
 -16 11 1 1.23 0.86
 -16 -11 -1 -0.46 1.09
 -17 0 1 -0.94 0.54
 -17 0 1 -0.25 0.66
 -17 0 -1 -0.02 0.55
 -17 -1 1 1.23 0.57
 -17 1 -1 0.34 0.55
 -17 -1 1 1.29 0.97
 -17 1 -1 1.59 0.65
 -17 1 1 1.84 0.65
 -17 -1 -1 2.32 0.73
 -17 -1 -1 1.03 0.62
 -17 -2 1 1.81 0.63
 -17 -2 1 2.68 0.8
 -17 2 -1 1.01 0.64
 -17 -2 -1 2.23 0.83
 -17 2 1 0.93 0.65
 -17 -2 -1 1.23 0.65
 -17 3 -1 -0.41 0.61
 -17 3 -1 -0.61 0.53
 -17 -3 1 0.5 0.8
 -17 -3 -1 0.08 0.67
 -17 3 1 -0.88 0.6
 -17 -3 -1 0.55 0.76
 -17 3 1 -0.53 0.5
 -17 -4 1 2.3 0.87
 -17 4 -1 2.32 0.59
 -17 -4 -1 2.15 0.81
 -17 4 1 2.08 0.53
 -17 4 1 0.98 0.59
 -17 -5 1 1.58 0.8
 -17 -5 1 -0.51 0.61
 -17 -5 1 0.72 0.87
 17 5 1 0.6 0.75
 -17 -5 1 1.1 0.51
 -17 -5 -1 0.53 0.79
 17 5 -1 0.22 0.71
 -17 5 1 -0.41 0.48
 -17 -5 -1 -0.23 0.8
 17 5 -1 0.62 0.59
 -17 -6 1 -0.08 0.96
 17 6 1 0.72 0.61
 -17 -6 1 0.77 0.84
 -17 -6 1 0.57 0.62
 17 6 1 0.75 0.7
 17 6 1 0.29 0.81
 -17 6 -1 0.48 0.57
 -17 -6 1 0.66 1.26
 17 6 -1 1.33 0.78
 17 6 -1 0.37 0.62
 -17 6 1 0.02 0.51
 -17 -6 -1 1.88 0.93
 -17 -6 -1 -0.25 1.47
 -17 -6 -1 1.22 0.67
 -17 -7 1 1.63 0.99
 -17 -7 1 1.86 0.94
 17 7 1 2.14 0.89
 -17 -7 1 2.78 0.78
 -17 -7 -1 2.73 0.76
 -17 -7 -1 2.81 1.01
 17 7 -1 1.4 0.85
 -17 -7 -1 2.69 0.66
 17 7 -1 2.89 0.73
 -17 -8 1 0.72 0.95
 -17 -8 1 2.51 0.84
 17 8 1 2.34 0.75
 -17 -8 1 1.22 1.14
 17 8 1 2.14 0.95
 -17 -8 -1 3.75 1.02
 -17 -8 -1 3.57 0.79
 17 8 -1 2.06 0.91
 17 8 -1 2.79 0.84
 -17 8 1 2 0.57
 -17 -8 -1 1.23 0.74
 17 8 -1 2.33 0.8
 -17 -9 1 1.04 1.07
 17 9 1 0.43 0.92
 -17 9 -1 0.7 0.8
 -17 -9 1 1.33 0.8
 -17 -9 1 0.1 0.9
 -17 -9 1 0.81 1.01
 -17 -9 -1 0.37 1
 -17 9 1 -0.44 0.65
 -17 9 1 0.84 0.6
 -17 -9 -1 0.92 1.09
 -17 -9 -1 0.67 0.86
 17 9 -1 1 0.91
 17 9 -1 0.46 0.86
 -17 -10 1 3.32 1.28
 -17 10 -1 1.72 0.73
 -17 -10 1 0.24 1.12
 17 -10 -1 0.74 0.66
 17 -10 -1 0.7 0.77
 -17 -10 1 -0.38 0.99
 -17 -10 1 -0.87 0.92
 17 10 1 -0.39 0.94
 17 10 1 -0.44 0.94
 17 10 1 -1.13 1.06
 -17 10 -1 1.37 0.86
 17 10 -1 1.68 1.03
 -17 -10 -1 -0.92 1.14
 17 10 -1 2.45 1.06
 17 10 -1 1.02 0.97
 -17 10 1 -0.32 0.81
 -17 -10 -1 0.6 1.23
 -17 10 1 1.46 0.7
 -17 -10 -1 0.6 0.97
 -17 -10 -1 -1.28 0.96
 -18 0 1 0.06 0.82
 -18 0 -1 -0.02 0.61
 -18 0 1 -0.43 0.56
 -18 0 -1 1.35 0.82
 -18 -1 1 7.53 0.71
 -18 -1 1 5.56 0.86
 -18 1 -1 7.14 0.81
 -18 1 -1 5.98 0.69
 -18 -1 -1 5.83 0.73
 -18 1 1 5.42 0.64
 -18 -1 -1 8 0.87
 -18 1 1 7.9 0.81
 -18 2 -1 0.02 0.57
 -18 -2 1 0.48 0.76
 -18 -2 1 -0.02 0.63
 -18 2 -1 0.79 0.66
 -18 -2 -1 0.87 0.77
 -18 2 1 0.41 0.65
 -18 3 -1 11.54 0.84
 -18 -3 1 13.35 1.09
 -18 3 1 10.26 0.93
 -18 3 1 10.19 0.86
 -18 -4 1 3.13 0.78
 -18 -4 1 2.02 0.93
 -18 4 1 2.62 0.55
 -18 -4 -1 3.38 0.92
 -18 -5 1 0.32 0.97
 -18 -5 1 0.8 0.86
 -18 -5 -1 2.3 0.93
 18 5 -1 1.63 0.76
 -18 -5 -1 1.39 0.9
 -18 5 1 0.57 0.56
 -18 5 1 1.49 0.56
 -18 -6 1 -0.17 0.85
 18 6 1 1.49 0.83
 -18 -6 1 0.9 0.68
 -18 -6 1 -0.89 1.13
 -18 -6 1 1.3 0.99
 -18 6 -1 -0.6 0.54
 -18 -6 -1 -0.98 0.9
 -18 -6 -1 -0.27 0.94
 18 6 -1 0.02 0.83
 18 6 -1 -1.07 0.67
 -18 6 1 0.45 0.55
 18 7 1 1.68 0.91
 -18 -7 1 1.3 0.78
 -18 -7 1 3.49 1.09
 -18 7 -1 1.47 0.66
 -18 -7 1 2.01 0.68
 18 7 1 1.66 0.68
 -18 -7 -1 1.24 1.01
 18 7 -1 2.41 0.86
 -18 -8 1 8.43 0.92
 18 8 1 7.28 1.04
 -18 -8 1 6.08 1.27
 -18 -8 1 9.61 1.17
 -18 -8 1 7.75 0.88
 18 8 1 7.43 1.01
 -18 -8 -1 7.56 0.92
 -18 -8 -1 5.93 0.83
 -18 8 1 6.71 0.79
 -18 -8 -1 8.15 1.29
 18 8 -1 7.73 0.9
 18 8 -1 7.69 1.06
 -18 -8 -1 7.69 1.15
 18 8 -1 8.25 0.94
 -18 8 1 6.97 0.72
 18 9 1 0.89 1.02
 -18 9 -1 2 0.86
 18 9 1 4.4 0.98
 -18 -9 1 3.41 0.9
 18 9 1 2.92 0.89
 -18 -9 1 1.04 1.18
 -18 -9 1 2.47 1.15
 -18 -9 -1 3.64 1.23
 18 9 -1 1.35 0.97
 -18 -9 -1 1.73 1.21
 18 9 -1 2.07 1.05
 18 9 -1 2.4 0.91
 -18 9 1 2.26 0.65
 -18 -9 -1 2.94 0.88
 -18 -9 -1 3.43 0.94
 -19 0 1 0.21 0.8
 -19 0 1 0.42 0.59
 -19 0 -1 0.02 0.76
 -19 -1 1 0.79 0.62
 -19 1 -1 2.16 1.17
 -19 -1 -1 0.03 0.67
 -19 -1 -1 2.17 0.8
 -19 1 1 2.04 0.74
 -19 2 -1 0.76 0.73
 -19 2 1 0.08 0.56
 -19 -2 -1 2.26 0.88
 -19 2 1 0.58 0.75
 -19 -3 1 1.69 0.72
 -19 -3 1 0.75 0.9
 -19 3 -1 0.01 0.6
 -19 -3 -1 0.38 0.92
 -19 4 -1 -0.95 0.59
 -19 -4 1 1.91 0.97
 -19 4 1 -0.49 0.62
 -19 4 1 -0.15 0.56
 -19 -4 -1 -1.16 0.93
 -19 -5 1 1.91 0.99
 -19 5 -1 0.31 0.66
 -19 5 -1 0.94 0.66
 -19 -5 1 2.4 0.89
 -19 5 1 1.21 0.56
 -19 -5 -1 2.68 0.93
 -19 -5 -1 2.03 1.07
 -19 -6 1 1.22 0.88
 -19 -6 1 0.75 1.06
 -19 6 -1 0.1 0.62
 -19 -6 -1 0.41 0.98
 -19 -6 -1 1.8 1.01
 -19 6 1 0.66 0.59
 19 6 -1 0.61 0.84
 -19 7 -1 -0.76 0.67
 -19 -7 1 1.72 0.76
 19 7 1 0.15 0.97
 -19 -7 1 -0.49 1.15
 19 7 -1 0.77 0.91
 -19 -7 -1 0.63 1.13
 -19 -7 -1 -0.34 0.63
 -19 -7 -1 -1.32 1.03
 19 7 -1 0.23 0.73
 19 7 -1 -0.94 0.67
 -19 7 1 0.19 0.59
 -19 -8 1 -0.04 0.81
 -19 -8 1 -1.95 1.15
 19 8 1 -0.68 0.71
 -20 0 -1 2.31 0.84
 -20 0 1 2.99 0.82
 -20 -1 1 1.69 0.88
 -20 1 -1 2.29 0.72
 -20 -1 -1 2.72 0.87
 -20 -1 -1 2.37 0.69
 -20 -2 1 1.32 0.73
 -20 2 1 1.83 0.81
 -20 -2 -1 3.2 0.78
 -20 -2 -1 2.14 0.9
 -20 3 -1 7.34 0.86
 -20 3 -1 9.08 0.8
 -20 -3 1 9.38 1.16
 -20 3 1 9.2 0.75
 -20 3 1 7.14 1.02
 -20 -3 -1 9.5 1.15
 -20 -4 1 1.46 0.89
 -20 -4 -1 1.97 1.09
 -20 5 -1 2.49 0.69
 -20 -5 -1 2.93 1.09
 -20 5 1 2.73 0.75
 -20 -6 1 0.02 1.1
 -20 6 -1 -0.88 0.66
 -20 -6 1 -0.7 1.01
 -20 -6 -1 -0.52 1.02
 -20 -6 -1 0.71 1.2
 -20 6 1 0.17 0.62
 -21 0 1 -0.79 0.65
 -21 0 1 -0.49 0.91
 -21 0 -1 -0.42 0.92
 -21 1 -1 1.48 0.83
 -21 -1 1 2.62 0.73
 -21 1 1 1.5 0.65
 -21 -1 -1 1.49 0.88
 -21 2 -1 -0.95 0.72
 -21 -2 1 0.75 1.02
 -21 -2 -1 0.5 0.79
 -21 2 1 -1.11 0.82
 -21 -3 1 -0.29 1.01
 -21 -3 1 -0.64 0.83
 -21 -3 -1 1.79 1.03
 -21 -3 -1 1.1 1.41
 0 1 2 -0.43 0.2
 0 1 -2 -0.57 0.14
 0 -1 -2 -0.57 0.22
 0 1 -2 -0.74 0.23
 0 1 -2 -0.56 0.21
 0 -1 2 -0.57 0.26
 0 1 2 -0.17 0.27
 0 -2 2 38.96 1.15
 0 2 -2 37.46 1.14
 0 2 2 39.58 1.15
 0 2 -2 39.6 1.15
 0 -2 2 42.23 1.08
 0 2 -2 41.4 1.07
 0 -2 -2 39.58 1.15
 0 -2 -2 41.6 1.12
 0 2 2 40.34 1.15
 0 2 2 40.6 1.1
 0 -2 2 39.32 1.15
 0 -3 -2 0.62 0.47
 0 3 -2 -0.04 0.48
 0 -3 2 -0.8 0.41
 0 -3 -2 0.12 0.4
 0 -3 2 -0.2 0.45
 0 3 2 -0.04 0.4
 0 3 2 -0.37 0.46
 0 -3 -2 0.11 0.46
 0 -3 2 -0.12 0.3
 0 3 -2 0.28 0.47
 0 3 2 -0.71 0.48
 0 3 -2 0.16 0.29
 0 -4 -2 23.68 0.93
 0 -4 2 21.99 0.83
 0 4 2 23.85 1.02
 0 4 2 24.38 0.95
 0 -4 -2 22.45 1
 0 -4 2 24.21 1
 0 4 -2 23.23 0.98
 0 4 2 22.82 1.03
 0 -4 -2 24.37 1.01
 0 -4 2 23.96 1
 0 5 -2 0.05 0.44
 0 5 -2 -0.5 0.51
 0 -5 2 0.04 0.48
 0 -5 2 0.27 0.32
 0 5 2 -0.35 0.48
 0 -5 2 0.53 0.45
 0 -5 -2 -0.52 0.48
 0 5 2 -0.32 0.48
 0 -5 -2 0.8 0.5
 0 -5 -2 0.53 0.44
 0 5 -2 -0.1 0.53
 0 5 2 0.22 0.43
 0 6 2 273.46 6.71
 0 6 -2 265.46 6.71
 0 6 2 259.34 6.7
 0 -6 2 266.94 6.71
 0 -6 -2 276.8 6.71
 0 6 2 282.99 6.7
 0 -6 2 280.39 6.63
 0 -6 -2 272.51 6.69
 0 6 -2 271.52 6.71
 0 6 -2 271.04 6.7
 0 -6 2 264.24 6.7
 0 -6 -2 259.24 6.7
 0 7 -2 -0.04 0.59
 0 -7 2 -0.77 0.63
 0 7 2 0.28 0.53
 0 -7 -2 -1.13 0.66
 0 -7 2 1.14 0.64
 0 -7 -2 -0.31 0.51
 0 7 2 -0.22 0.63
 0 7 2 0.35 0.62
 0 -7 -2 -0.56 0.6
 0 -7 2 0.26 0.39
 0 7 -2 -0.08 0.6
 0 7 -2 -0.39 0.54
 0 8 -2 8.84 0.71
 0 8 2 8.05 0.75
 0 8 2 9.59 0.8
 0 -8 -2 9.5 0.79
 0 -9 -2 -0.65 0.61
 0 9 -2 0.52 0.62
 0 -9 2 -0.45 0.69
 0 -9 2 -0.63 0.63
 0 -9 -2 -0.27 0.7
 0 9 2 0.94 0.69
 0 9 2 0.25 0.55
 0 -9 2 -0.46 0.41
 0 -9 -2 -0.46 0.7
 0 9 -2 -0.15 0.69
 0 9 -2 0.8 0.64
 0 9 2 -0.61 0.66
 0 10 -2 3.88 0.82
 0 -10 2 3.56 0.79
 0 -10 2 6.3 0.85
 0 -10 -2 4.72 0.81
 0 10 -2 4.79 0.76
 0 10 2 5.37 0.7
 0 10 2 5.26 0.82
 0 10 2 4.43 0.8
 0 10 -2 4.68 0.81
 0 -10 -2 4.75 0.71
 0 11 2 0.55 0.84
 0 11 -2 -0.95 0.77
 0 -11 2 0.34 0.89
 0 11 2 -1.17 0.85
 0 11 2 0.1 0.69
 0 -11 2 -0.21 0.82
 0 11 -2 -0.91 0.73
 0 -11 2 0.58 0.51
 0 11 -2 1.16 0.84
 0 -11 -2 0.05 0.82
 0 12 -2 8.34 1.47
 0 -12 2 8.88 1.05
 0 -12 -2 8.97 1.09
 0 -12 2 8.52 1.41
 0 12 2 8.09 1.1
 0 -12 -2 6.37 1
 0 12 -2 7.56 0.99
 0 12 -2 7.49 0.98
 0 -12 2 6.4 0.65
 0 -13 -2 0.98 0.96
 0 -13 2 0.13 0.58
 0 13 2 0.81 1.02
 0 -13 2 1.02 0.98
 0 13 2 0.16 1.21
 0 13 -2 -0.06 0.94
 0 -13 -2 -0.81 0.96
 0 13 -2 1.73 0.88
 0 -13 2 -0.89 1.01
 0 13 -2 0.03 1.42
 0 -14 -2 3.63 0.72
 0 14 2 6.21 1.16
 0 -14 -2 6.25 1.13
 0 14 2 4.27 1.14
 0 14 -2 3.83 1.12
 0 14 -2 4.15 1.07
 0 -14 2 3.96 0.69
 0 -14 2 1.98 1.12
 0 14 -2 5.76 1.14
 0 -14 -2 3.61 1.18
 0 -15 -2 -0.56 1.08
 0 15 2 -0.47 1.05
 0 -15 -2 -1 0.73
 0 -15 -2 -1.12 1.17
 0 15 -2 -0.01 1.18
 0 -15 2 0.05 0.68
 0 -15 2 0.15 1.17
 0 15 -2 0.93 1.1
 0 -16 -2 5.63 0.89
 0 -16 -2 6.19 1.34
 0 16 -2 5.45 1.1
 0 16 2 8.64 1.49
 0 16 2 7.9 1.31
 0 -16 2 6.85 1.33
 0 16 -2 5.55 1.33
 0 -16 2 4.64 0.85
 0 16 2 6.88 1.39
 0 -16 2 6.93 1.35
 0 -16 -2 5.1 1.42
 0 16 -2 7.98 1.41
 0 17 2 2.73 1.34
 0 -17 2 0.63 1.51
 0 17 2 2.2 1.32
 0 -17 -2 2.07 1.35
 0 -17 2 -1.09 0.77
 0 -17 -2 -0.07 1.4
 0 -17 2 0.59 1.17
 0 17 -2 0.49 1.3
 0 17 -2 -0.71 1.41
 0 -17 -2 2.92 1.36
 0 17 2 0.15 1.37
 1 -1 -2 9.64 0.35
 -1 -1 2 8.89 0.44
 1 1 2 9.18 0.43
 1 1 2 10 0.43
 1 -1 -2 9.91 0.42
 -1 -1 2 9.62 0.46
 -1 1 -2 9.76 0.42
 -1 1 -2 10.11 0.33
 1 -1 -2 10.3 0.45
 1 -1 -2 9.73 0.44
 1 1 2 10.14 0.44
 -1 -1 2 9.96 0.44
 -1 -1 -2 9.67 0.43
 1 1 -2 9.64 0.46
 1 1 -2 10.08 0.44
 1 1 -2 10.13 0.44
 1 -1 2 9.94 0.43
 -1 -1 -2 9.85 0.42
 1 -1 2 10.11 0.42
 -1 1 2 9.79 0.33
 -1 1 2 8.91 0.41
 -1 1 2 9.5 0.44
 1 -2 -2 2.29 0.29
 -1 2 -2 2.07 0.38
 1 -2 -2 2.6 0.39
 1 2 2 2.11 0.39
 -1 2 -2 1.65 0.34
 -1 -2 2 1.52 0.3
 1 -2 -2 2.56 0.36
 -1 -2 2 2.11 0.38
 1 2 2 2 0.37
 1 2 2 1.98 0.32
 -1 2 2 1.83 0.28
 1 -2 2 2.15 0.35
 -1 -2 -2 1.87 0.34
 -1 2 2 2.3 0.37
 1 -2 2 1.77 0.37
 1 2 -2 1.29 0.33
 -1 2 2 2.7 0.4
 1 2 -2 1.41 0.27
 -1 -2 -2 2.06 0.35
 1 2 -2 1.75 0.34
 -1 -3 2 87.09 2.24
 1 -3 -2 85.37 2.28
 1 3 2 84.66 2.29
 -1 3 -2 84.46 2.27
 1 -3 -2 86.94 2.24
 -1 -3 2 83.88 2.28
 1 3 2 86.26 2.26
 1 -3 -2 89.81 2.29
 1 3 2 88.23 2.3
 -1 -3 2 84.37 2.28
 -1 3 -2 86.35 2.27
 1 -3 2 85.47 2.26
 1 3 -2 82.36 2.28
 -1 -3 -2 87.36 2.28
 1 -3 2 86.6 2.27
 -1 3 2 87.05 2.29
 1 3 -2 86.2 2.28
 -1 3 2 86.1 2.24
 1 3 -2 86.68 2.26
 -1 -3 -2 83.08 2.28
 -1 3 2 89.01 2.28
 1 3 -2 88.75 2.24
 1 -3 2 88.68 2.15
 -1 -3 -2 89.81 2.27
 -1 -4 2 5.39 0.54
 1 4 2 5.21 0.48
 -1 -4 2 5.62 0.58
 -1 4 -2 5.13 0.5
 1 -4 -2 5.54 0.51
 1 4 2 6.06 0.55
 1 4 2 5.25 0.53
 1 -4 2 6.02 0.56
 -1 4 2 4.57 0.45
 1 4 -2 5.18 0.53
 1 4 -2 5.53 0.47
 1 4 -2 5.53 0.54
 1 -4 2 6.15 0.5
 -1 5 -2 42.17 1.39
 -1 5 -2 42.33 1.36
 1 -5 -2 44.12 1.39
 -1 -5 2 39.88 1.29
 -1 -5 2 39.5 1.38
 1 -5 -2 40.57 1.31
 -1 5 -2 43.2 1.39
 1 5 2 39.62 1.35
 1 5 2 42.85 1.41
 1 5 2 42.25 1.39
 1 -5 -2 41.89 1.37
 -1 -5 2 43.05 1.41
 -1 -5 -2 40.57 1.39
 -1 5 2 42.98 1.41
 1 -5 2 42.5 1.38
 -1 5 2 42.78 1.34
 -1 5 2 42.29 1.38
 1 5 -2 44.25 1.37
 1 -5 2 40.97 1.38
 1 5 -2 43.67 1.4
 -1 -5 -2 43.9 1.4
 1 5 -2 42.19 1.38
 -1 -5 -2 40.15 1.34
 1 -5 2 42.29 1.19
 1 6 2 54.21 1.73
 1 6 2 54.95 1.76
 1 -6 -2 55.43 1.69
 -1 6 -2 54.96 1.7
 1 -6 -2 56.43 1.74
 -1 -6 2 56.8 1.63
 1 -6 -2 54.43 1.74
 -1 6 -2 56.51 1.75
 -1 -6 2 54.29 1.73
 1 6 2 59.23 1.71
 -1 6 -2 54.76 1.73
 -1 -6 2 55.35 1.75
 -1 6 2 53.93 1.74
 1 6 -2 55.23 1.71
 -1 -6 -2 54.54 1.74
 1 6 -2 56.34 1.74
 1 -6 2 54.94 1.74
 1 -6 2 54.26 1.73
 1 -6 2 58.61 1.55
 1 6 -2 55.63 1.75
 -1 -6 -2 59.15 1.76
 -1 6 2 58.2 1.68
 -1 -6 -2 56.19 1.7
 -1 6 2 55.98 1.73
 1 -7 -2 24.55 1.21
 1 -7 -2 23.88 1.13
 -1 -7 2 25.06 1.22
 -1 7 -2 25.16 1.23
 -1 7 -2 23.87 1.2
 1 -7 -2 24.44 1.24
 1 7 2 23.45 1.14
 -1 -7 2 26.59 1.23
 1 7 2 23 1.23
 -1 7 -2 25.08 1.19
 1 7 2 22.23 1.25
 -1 -7 2 23.7 1.06
 -1 -7 -2 24.68 1.25
 -1 -7 -2 24.96 1.22
 -1 7 2 23.68 1.2
 -1 7 2 24.88 1.13
 -1 -7 -2 26.47 1.16
 1 -7 2 25.38 0.95
 1 7 -2 25.24 1.24
 1 7 -2 25.01 1.23
 1 7 -2 23.65 1.16
 -1 7 2 25.5 1.2
 1 -7 2 25.03 1.21
 -1 -8 2 21.02 1.24
 1 -8 -2 21.63 1.26
 -1 8 -2 24.07 1.28
 -1 8 -2 23.26 1.2
 1 8 2 20.87 1.29
 1 -8 -2 21.31 1.14
 1 8 2 23.57 1.26
 1 8 2 20.04 1.17
 1 -8 -2 23.36 1.23
 -1 -8 2 21.3 1.24
 -1 -8 2 21.94 1.06
 -1 -8 -2 22.49 1.25
 1 8 -2 21.66 1.17
 1 -8 2 23.39 1.24
 1 -8 2 21.07 0.94
 1 8 -2 22.53 1.25
 1 -8 2 23.65 1.25
 -1 8 2 21.92 1.23
 -1 -8 -2 22.3 1.25
 1 8 -2 23.18 1.25
 -1 -8 -2 23.06 1.16
 -1 8 2 21.55 1.14
 1 -9 -2 0.04 0.6
 -1 9 -2 0.97 0.71
 1 9 2 -0.24 0.67
 -1 9 -2 0.94 0.65
 -1 -9 2 0.73 0.73
 -1 -9 2 0.96 0.46
 1 -9 -2 1.24 0.64
 1 -9 -2 1.35 0.66
 1 9 2 -0.02 0.67
 1 9 2 0.12 0.58
 -1 9 -2 1.73 0.63
 -1 9 2 1.26 0.71
 -1 -9 -2 1.24 0.59
 1 9 -2 1.44 0.72
 1 9 -2 0.37 0.7
 -1 9 2 0.74 0.58
 1 -9 2 0.83 0.66
 1 9 -2 1.29 0.62
 1 -9 2 0.85 0.65
 -1 9 2 2.1 0.67
 1 -9 2 0.36 0.4
 -1 -9 -2 -0.13 0.67
 -1 -9 -2 0.55 0.73
 -1 -10 2 13.68 0.93
 1 -10 -2 15.1 1.03
 1 10 2 13.24 0.93
 1 10 2 15.45 1.35
 -1 10 -2 13.08 0.9
 -1 -10 2 13.7 1.04
 -1 -10 2 13.85 1
 -1 10 -2 14.14 1.23
 1 10 2 14.31 0.97
 -1 10 -2 14.37 0.97
 -1 -10 -2 12.05 0.89
 1 10 -2 13.64 0.95
 1 10 -2 12.36 0.89
 -1 10 2 13.72 1.2
 -1 -10 -2 13.66 0.97
 1 -10 2 14.55 1
 -1 10 2 12.31 0.98
 1 -10 2 12.67 0.93
 1 10 -2 14.68 1.29
 -1 11 -2 3.02 0.85
 -1 -11 2 2.85 0.91
 -1 11 -2 2.43 0.81
 1 11 2 2.41 0.83
 -1 -11 2 1.81 0.56
 -1 11 -2 1.12 0.86
 1 -11 -2 2.47 0.83
 -1 -11 2 1.51 0.87
 1 11 2 1.56 0.87
 1 -11 2 2.83 0.52
 1 -11 2 2.27 0.89
 -1 -11 -2 3.12 0.79
 -1 11 2 3.23 0.88
 -1 11 2 2.3 0.74
 -1 11 2 2.9 0.83
 1 11 -2 2.53 0.78
 -1 -11 -2 2.69 0.87
 1 11 -2 4.46 0.93
 1 11 -2 2.63 0.88
 -1 -12 2 11.54 1.15
 1 12 2 9.01 1.11
 -1 12 -2 7.7 1.56
 1 -12 -2 9.83 1.04
 -1 12 -2 8.09 1.04
 -1 -12 2 8.05 1.05
 -1 -12 2 8.53 0.74
 1 12 2 7.19 1.55
 1 12 2 11.48 1.07
 1 -12 -2 7.71 1.64
 -1 12 2 10.72 1.06
 1 12 -2 9.02 1.07
 1 -12 2 11.6 1.12
 -1 -12 -2 10.59 1.02
 -1 12 2 7.94 0.95
 -1 12 2 10.85 1.07
 1 12 -2 11.67 1.11
 1 -12 2 9.08 1.23
 -1 -12 -2 9.27 1.06
 -1 -12 -2 12.13 1.1
 1 12 -2 9.99 1.11
 1 -12 2 11.69 1.03
 -1 -13 2 8.19 1.13
 1 13 2 7.5 1.12
 1 -13 -2 7.04 1.09
 1 -13 -2 7.79 1.09
 -1 13 -2 6.57 1.11
 1 13 2 6.91 0.96
 1 13 2 8.66 1.23
 -1 -13 2 6.3 0.74
 -1 13 -2 6.69 0.93
 -1 13 -2 7.3 1.12
 1 13 -2 7.32 1.1
 1 -13 2 7.19 1.11
 1 -13 2 5.81 0.65
 1 13 -2 5.28 1.03
 1 -13 2 6.77 1.05
 -1 13 2 8.2 1.16
 -1 -13 -2 8.37 1.98
 -1 -13 -2 6.09 1.12
 -1 13 2 8.27 1.17
 -1 14 -2 -0.16 1.07
 -1 -14 2 1.36 0.99
 1 14 2 1.25 1.07
 -1 14 -2 0.05 0.9
 1 14 2 1.9 1.17
 -1 -14 2 -0.52 1.07
 1 14 2 -0.71 0.95
 1 -14 -2 0.94 1.05
 1 -14 -2 0.3 0.66
 1 -14 -2 -1.02 1.03
 1 -14 2 0.56 1.13
 1 14 -2 0.18 1.13
 -1 14 2 1.92 1.11
 -1 14 2 1.9 1.11
 -1 14 2 -0.93 0.89
 -1 -14 -2 0.3 1.06
 1 14 -2 -1.27 0.9
 1 -14 2 0.02 1.2
 -1 -15 2 2.33 1.3
 -1 -15 2 1.07 0.72
 1 15 2 2.72 1.17
 -1 15 -2 1.06 1.15
 1 15 2 1.98 1.22
 1 -15 -2 2.62 1.16
 1 15 2 3.33 1.18
 1 -15 -2 -0.85 1.1
 -1 -15 2 0.68 1.14
 1 15 -2 -0.84 1.18
 1 -15 2 1.6 1.14
 -1 15 2 0.94 1.14
 -1 -15 -2 0.81 1.21
 1 15 -2 -0.71 1.1
 -1 -15 -2 0.75 0.76
 -1 15 2 1.2 1.22
 1 15 -2 1.07 1.06
 1 -15 2 2.58 1.16
 1 -15 2 1.66 0.64
 1 -16 -2 4.44 0.84
 1 16 2 7.02 1.35
 -1 16 -2 5.49 1.35
 -1 16 -2 4.86 1.12
 -1 -16 2 7.16 1.22
 1 16 2 6.36 1.38
 -1 -16 2 4.67 0.85
 1 -16 -2 5.17 1.28
 -1 -16 2 3.17 1.33
 1 -16 -2 6.56 1.45
 1 16 2 5.49 1.23
 1 -16 2 4.8 0.77
 -1 16 2 4.98 1.36
 1 16 -2 7.74 1.29
 1 -16 2 5.8 1.23
 1 -16 2 3.33 1.41
 1 16 -2 6.37 1.32
 -1 -16 -2 6.91 1.39
 1 16 -2 6.47 1.16
 -1 -16 -2 4.82 1.08
 -1 -17 2 3.18 1.42
 -1 17 -2 0.6 1.39
 1 -17 -2 -2.03 1.33
 1 17 2 -1.51 1.35
 -1 -17 2 -0.79 0.85
 1 -17 -2 0.25 0.75
 -1 17 -2 0.35 1.09
 -1 -17 -2 -0.1 0.81
 -1 17 2 1.51 1.33
 -1 17 2 0.21 1.38
 1 17 -2 -0.09 1.38
 1 -17 2 -2.04 1.36
 -1 17 2 2.76 1.45
 -1 -17 -2 -1.1 1.29
 1 17 -2 1.32 1.41
 -1 -17 -2 0.93 1.32
 -2 0 -2 117.62 2.9
 -2 0 -2 118.24 2.9
 2 0 -2 121.17 2.92
 -2 0 2 121.71 2.92
 2 0 2 118.84 2.9
 -2 0 2 118.94 2.92
 -2 -1 2 80.99 2.01
 -2 1 -2 77.05 1.98
 -2 -1 2 78.81 1.99
 -2 1 -2 76.82 1.98
 2 -1 -2 85.75 2.01
 2 1 2 84.78 2.03
 -2 -1 2 78.04 2.04
 2 1 2 77.44 2
 -2 -1 2 80.13 2.01
 2 1 -2 83.33 2.02
 2 -1 2 78.17 1.98
 -2 1 2 85.55 2
 -2 -1 -2 81.74 2.02
 2 1 -2 79.55 2.04
 -2 -1 -2 75.91 1.99
 -2 -1 -2 76.32 1.99
 2 1 -2 81.24 2.02
 2 1 -2 78.61 1.99
 2 2 2 16.85 0.74
 2 2 2 16.86 0.77
 -2 -2 2 15.58 0.77
 2 -2 -2 16.25 0.62
 -2 -2 2 16.72 0.77
 2 -2 -2 17.53 0.75
 -2 -2 2 15.82 0.72
 2 2 2 15.09 0.76
 2 -2 -2 16.41 0.74
 -2 -2 2 16.66 0.78
 -2 2 -2 15.62 0.69
 -2 2 -2 16.44 0.7
 2 -2 2 16.08 0.71
 -2 -2 -2 17.44 0.74
 -2 2 2 16.82 0.74
 -2 -2 -2 16.1 0.75
 -2 2 2 17.28 0.74
 -2 2 2 16.97 0.62
 2 2 -2 17.11 0.79
 2 2 -2 16.3 0.72
 2 2 -2 15.77 0.79
 -2 -2 -2 16.86 0.76
 2 2 -2 16.37 0.78
 2 -2 2 15.68 0.71
 2 -3 -2 9.18 0.73
 2 3 2 7.57 0.51
 -2 -3 2 8.13 0.72
 -2 3 -2 8.76 0.55
 2 -3 -2 8.29 0.63
 -2 -3 2 7.07 0.51
 2 -3 -2 6.91 0.51
 2 3 2 7.95 0.69
 2 3 2 8.68 0.77
 -2 -3 2 6.82 0.51
 -2 -3 2 7.49 0.55
 2 3 -2 6.97 0.46
 -2 3 2 8.44 0.76
 -2 3 2 8.09 0.56
 -2 -3 -2 7.85 0.54
 2 3 -2 8.84 0.75
 2 3 -2 6.91 0.5
 2 -3 2 7.64 0.52
 -2 -3 -2 8.42 0.73
 2 3 -2 8.65 0.73
 2 4 2 5.56 0.49
 2 5 2 41.02 1.36
 -2 -5 2 43.58 1.39
 -2 -5 2 42.76 1.41
 -2 -5 2 41.96 1.41
 -2 5 -2 40.89 1.38
 2 -5 -2 41.86 1.38
 2 5 2 42.23 1.4
 2 -5 -2 43.05 1.4
 2 -5 -2 42.45 1.33
 2 5 2 41.79 1.41
 -2 -5 2 41.45 1.35
 -2 5 -2 42.08 1.39
 -2 5 2 43.78 1.4
 2 -5 2 43.1 1.15
 2 -5 2 41.81 1.38
 2 5 -2 44.01 1.38
 -2 -5 -2 44.25 1.41
 -2 -5 -2 41.62 1.39
 -2 -5 -2 40.7 1.36
 -2 5 2 42.3 1.4
 2 5 -2 42.88 1.4
 2 5 -2 43.7 1.39
 2 -5 2 41.49 1.38
 -2 5 2 43.79 1.33
 -2 6 -2 114.49 3.03
 -2 6 -2 115.04 3.04
 -2 -6 2 112.59 3.06
 -2 -6 2 115.34 3.05
 -2 6 -2 113.4 3.04
 2 -6 -2 114.09 3.05
 -2 -6 2 115.86 3.07
 2 -6 -2 117.27 3.06
 2 6 2 115.11 3.06
 2 6 2 112.74 3.07
 2 6 2 116.22 3.04
 2 -6 -2 114.65 3.01
 -2 -6 2 115.68 3.01
 2 -6 2 115.35 2.88
 2 6 -2 117.42 3.06
 2 6 -2 112.05 3.07
 2 -6 2 114.64 3.05
 -2 -6 -2 119.64 3.08
 2 6 -2 118.33 3.05
 2 -6 2 115.99 3.05
 -2 6 2 116.14 3.05
 -2 -6 -2 111.58 3.05
 -2 6 2 116.83 3.01
 -2 6 2 110.83 3.05
 -2 -6 -2 114.92 3.04
 -2 -7 2 103.14 2.77
 -2 -7 2 93.88 2.69
 -2 -7 2 102.47 2.75
 2 -7 -2 99.32 2.75
 -2 7 -2 102.12 2.75
 2 7 2 99.3 2.73
 2 -7 -2 100.08 2.76
 -2 7 -2 100.03 2.73
 2 7 2 96.52 2.76
 -2 7 -2 98.12 2.73
 2 7 2 99.5 2.76
 -2 -7 2 102.92 2.76
 2 7 -2 98.78 2.78
 2 -7 2 103.92 2.75
 -2 -7 -2 98.96 2.76
 2 -7 2 101.61 2.75
 -2 -7 -2 102.93 2.77
 2 7 -2 103.36 2.76
 2 -7 2 97.31 2.55
 -2 7 2 93.33 2.74
 -2 7 2 100.05 2.74
 2 7 -2 99.36 2.75
 -2 7 2 98.75 2.71
 -2 -7 -2 100.74 2.73
 -2 8 -2 14.91 1.1
 2 -8 -2 14.58 1.11
 2 8 2 14.14 1.07
 2 -8 -2 14.04 1.12
 -2 -8 2 14.23 1.15
 -2 8 -2 15.36 0.91
 2 8 2 14.86 1.17
 -2 -8 2 13.28 1.16
 2 8 2 15.15 0.89
 -2 8 -2 14.26 1.15
 -2 -8 2 12.87 0.99
 -2 -8 -2 15.36 1.06
 -2 -8 -2 14.69 1.17
 -2 -8 -2 13.21 1.13
 -2 8 2 13.85 1.04
 2 8 -2 13.82 1.06
 2 8 -2 13.97 1.14
 2 -8 2 15.86 0.75
 2 -8 2 13.69 1.14
 2 8 -2 14.78 1.18
 -2 8 2 14.63 1.13
 2 -8 2 13.55 1.1
 -2 8 2 14.29 1.13
 -2 -9 2 6.38 0.85
 -2 9 -2 6.73 0.72
 -2 9 -2 5.49 0.71
 -2 -9 2 4.36 0.56
 2 -9 -2 5.27 0.71
 -2 9 -2 5.23 0.76
 2 -9 -2 5.07 0.72
 2 9 2 5.79 0.73
 2 9 2 5.63 0.79
 2 9 2 5.86 0.82
 -2 -9 2 4.42 0.73
 -2 -9 -2 5.05 0.68
 -2 9 2 5.83 0.76
 -2 -9 -2 5.43 0.77
 2 -9 2 6.23 0.81
 2 9 -2 6 0.77
 2 -9 2 5.44 0.74
 -2 9 2 5.04 0.81
 2 9 -2 5.79 0.7
 -2 9 2 4.47 0.64
 2 9 -2 5.63 0.75
 -2 10 -2 6.66 0.77
 2 -10 -2 6.06 0.78
 -2 -10 2 6.92 0.81
 2 10 2 7.34 0.88
 2 10 2 7.54 0.88
 2 -10 -2 6.82 0.75
 2 10 2 6.25 0.76
 -2 -10 2 8.1 0.88
 -2 10 -2 8.24 0.75
 2 -10 2 7.94 0.83
 -2 10 2 7.64 0.84
 -2 -10 -2 6.91 0.75
 2 10 -2 6.92 0.75
 2 10 -2 6.12 0.81
 -2 10 2 6.3 0.83
 2 10 -2 7.47 0.81
 2 -10 2 7.81 0.82
 -2 10 2 6.18 0.74
 2 -11 -2 15.19 1.15
 2 11 2 14.87 1.07
 -2 -11 2 12.71 1.18
 -2 -11 2 13.97 1.05
 2 11 2 14.13 1.09
 2 11 2 12.48 1.02
 -2 11 -2 14.7 1.07
 -2 -11 2 15.2 1.11
 -2 11 -2 12.92 1
 2 -11 2 13.27 1.07
 -2 -11 -2 12.98 0.99
 -2 -11 -2 15.56 1.14
 2 11 -2 13.49 1.02
 2 -11 2 12.97 1.02
 2 11 -2 13.13 1.05
 2 11 -2 16.03 1.41
 -2 -11 -2 13.84 1.07
 2 -11 2 15.05 0.94
 -2 11 2 13.95 1.08
 -2 11 2 12.08 0.92
 2 -12 -2 4.23 0.97
 -2 12 -2 4.92 0.97
 2 -12 -2 4.8 0.98
 2 12 2 4.42 1
 -2 12 -2 3.81 0.96
 2 12 2 3.62 1.01
 -2 -12 2 3.51 1.02
 -2 12 -2 3.12 0.99
 2 12 2 3.81 0.94
 -2 -12 2 3.11 0.64
 -2 -12 2 3.88 0.92
 -2 -12 -2 4.45 0.99
 2 -12 2 3.32 0.55
 2 -12 2 1.83 0.95
 -2 12 2 5.39 1.01
 2 12 -2 5.19 1.01
 2 12 -2 2.51 0.86
 2 12 -2 3.86 0.94
 -2 12 2 2.95 0.78
 -2 12 2 5.46 0.98
 -2 -12 -2 2.92 0.97
 2 -12 2 2.86 0.99
 -2 -12 -2 3.04 1.17
 -2 -13 2 6.82 0.77
 -2 13 -2 7.75 1.07
 2 -13 -2 6.44 1.05
 -2 13 -2 7.53 1.02
 2 13 2 7.03 1.09
 -2 13 -2 9.03 1.15
 2 13 2 8.69 2.17
 2 13 2 8.21 1.07
 2 -13 -2 7.69 1.11
 -2 -13 2 6.99 1.01
 -2 -13 2 7.02 1.25
 -2 -13 -2 5.46 1.11
 -2 -13 -2 7.57 1.14
 2 -13 2 8.78 1.16
 2 13 -2 6.68 1.02
 2 -13 2 7 1.12
 -2 13 2 7.75 1.23
 2 13 -2 6.18 1.01
 -2 13 2 7.69 1.13
 -2 13 2 5.62 0.91
 -2 -13 -2 7.37 1.04
 2 13 -2 7.43 1.24
 -2 -14 2 1.97 1.05
 -2 -14 2 1.6 0.72
 2 14 2 -0.77 1.03
 -2 -14 2 0.73 1.06
 -2 14 -2 -0.22 1.03
 2 -14 -2 -0.61 1.04
 -2 14 -2 2.69 1.12
 2 14 2 1.6 1.15
 2 -14 -2 0.87 0.65
 -2 14 -2 -0.73 0.92
 2 14 -2 1.33 1.07
 2 -14 2 2.33 1.04
 2 14 -2 1.95 0.91
 -2 14 2 1.61 1.07
 2 -14 2 0.72 0.58
 2 14 -2 1.09 0.97
 2 -14 2 1.43 1.06
 -2 -14 -2 0.79 1.05
 -2 -14 -2 -0.22 1.08
 -2 -15 2 2.02 0.77
 -2 15 -2 3.16 1.1
 2 15 2 2.4 1.06
 -2 15 -2 2.24 1.12
 2 15 2 3.05 1.14
 -2 -15 2 2.35 1.23
 2 -15 -2 0.19 1.17
 -2 -15 2 1.75 1.2
 2 -15 -2 1.67 0.68
 -2 15 -2 -0.12 0.97
 -2 15 2 1.72 1.16
 2 15 -2 4.49 1.22
 -2 -15 -2 1.64 1.19
 -2 -15 -2 2.97 1.16
 2 -15 2 4.2 1.18
 2 15 -2 1.44 1
 -2 15 2 0.72 1.06
 2 -15 2 1.71 0.64
 2 16 2 3.54 1.36
 -2 -16 2 3.72 1.12
 2 -16 -2 4.18 0.77
 -2 16 -2 3.2 1.15
 -2 16 -2 3.95 1.27
 2 -16 -2 6.48 1.37
 -2 -16 2 5.89 1.36
 2 16 2 5.76 1.22
 2 16 2 6.05 1.29
 -2 -16 2 4.12 0.87
 -2 16 2 4.5 1.32
 -2 16 2 3.05 1.21
 2 16 -2 4.8 1.27
 -2 16 2 3.84 1.31
 2 16 -2 5.45 1.33
 -2 -16 -2 4.26 1.33
 2 -16 2 5.43 1.39
 -2 -16 -2 3.17 0.92
 2 -16 2 3.14 0.69
 -2 17 -2 3.64 1.47
 -2 -17 2 1.51 1.47
 -2 -17 2 5.05 1.45
 2 -17 -2 2.24 1.45
 2 -17 -2 3.13 1.41
 -2 -17 2 0.74 0.91
 2 17 2 1.46 1.42
 -2 17 -2 1.85 1.33
 2 -17 -2 2.5 0.76
 2 17 2 0.13 1.38
 -2 17 -2 4.58 1.29
 2 17 2 4.89 1.39
 2 -17 2 1.56 1.4
 -2 17 2 2.45 1.36
 -2 17 2 2.42 1.39
 2 -17 2 4.85 1.53
 2 -17 2 0.99 0.69
 -2 -17 -2 1.24 0.91
 2 17 -2 2.55 1.43
 -2 -17 -2 3 1.36
 2 17 -2 -0.1 1.4
 -3 0 2 741.99 18.8
 -3 0 -2 813.93 18.79
 3 0 -2 753.89 18.8
 -3 0 2 805.09 18.81
 -3 -1 -2 54.04 1.41
 -3 2 -2 318.14 7.89
 3 -2 -2 323.42 7.91
 3 2 2 324.41 7.91
 3 2 2 328.2 7.91
 -3 -2 2 325.66 7.92
 -3 2 -2 328.78 7.89
 3 2 2 331.25 7.93
 -3 -2 2 324.47 7.92
 3 -2 -2 316.21 7.89
 -3 -2 2 340.41 7.92
 -3 -2 2 337.91 7.96
 3 -2 -2 325.98 7.91
 3 -2 2 327.24 7.89
 -3 -2 -2 319.21 7.91
 3 2 -2 317.48 7.92
 -3 2 2 322.88 7.91
 3 2 -2 328.43 7.91
 3 2 -2 336.6 7.95
 -3 2 2 330.18 7.91
 3 -2 2 313.56 7.9
 -3 -2 -2 330.96 7.94
 -3 2 2 332.05 7.87
 -3 2 2 318.68 7.89
 -3 -2 -2 323.64 7.91
 3 2 -2 325.58 7.92
 -3 -3 2 3.88 0.42
 -3 -3 2 4.9 0.47
 -3 3 -2 4.23 0.43
 -3 -3 2 5.39 0.46
 3 3 2 5.39 0.48
 3 3 2 5.17 0.46
 -3 -3 2 4.55 0.46
 3 3 -2 4.68 0.48
 3 -3 2 4.91 0.44
 -3 -3 -2 5.21 0.51
 -3 3 2 3.92 0.37
 3 3 -2 5.2 0.48
 -3 -3 -2 5.33 0.47
 3 -3 2 3.96 0.44
 3 3 -2 4.71 0.44
 -3 -3 -2 4.82 0.45
 3 3 -2 4.01 0.44
 -3 -4 2 32.1 1.15
 -3 -4 2 33.88 1.18
 3 4 2 32.78 1.13
 -3 4 -2 32.63 1.11
 3 -4 -2 32.56 1.11
 3 4 2 33.31 1.16
 -3 -4 2 31.83 1.13
 -3 -4 2 31.73 1.15
 3 4 2 31.8 1.14
 -3 4 -2 33.84 1.11
 3 -4 -2 33.69 1.12
 3 4 -2 30.69 1.18
 3 4 -2 30.4 1.12
 -3 -4 -2 31.3 1.13
 -3 -4 -2 30.89 1.14
 3 -4 2 32.69 1.11
 3 -4 2 33.35 1.11
 3 4 -2 32.64 1.14
 -3 4 2 33.85 1.13
 -3 4 2 32.02 1.13
 -3 -4 -2 33.84 1.16
 -3 -5 2 37.09 1.29
 -3 -5 2 36.51 1.27
 -3 -5 2 35.84 1.26
 -3 5 -2 36.05 1.25
 -3 -5 2 36.51 1.26
 3 -5 -2 35.39 1.25
 3 5 2 35.48 1.26
 3 5 2 34.34 1.3
 3 5 2 36.41 1.28
 3 -5 -2 37.09 1.25
 -3 5 -2 38.31 1.25
 -3 -5 -2 36.42 1.31
 -3 5 2 35 1.19
 3 5 -2 34.99 1.25
 3 -5 2 34.97 1.24
 -3 5 2 35.71 1.26
 -3 5 2 36.61 1.26
 -3 -5 -2 34.06 1.26
 -3 -5 -2 35.18 1.26
 3 5 -2 37.15 1.27
 -3 -6 2 116.21 2.94
 -3 6 -2 110.59 2.92
 3 6 2 113.09 2.94
 3 6 2 107.71 2.94
 -3 -6 2 112.39 2.95
 -3 6 -2 107.99 2.92
 -3 -6 2 111.12 2.95
 3 -6 -2 108.51 2.93
 3 -6 -2 104.97 2.92
 3 6 2 109.56 2.95
 -3 -6 2 111.34 2.96
 3 6 -2 110.85 2.97
 -3 6 2 112.07 2.89
 -3 -6 -2 107 2.94
 3 6 -2 110.74 2.95
 -3 -6 -2 111.42 2.96
 3 -6 2 110.55 2.93
 -3 -6 -2 111.2 2.94
 -3 6 2 110.12 2.92
 3 6 -2 112.07 2.94
 -3 6 2 103.59 2.92
 3 -6 2 109.76 2.92
 -3 -7 2 3.28 0.6
 -3 -7 2 3.63 0.6
 3 7 2 3.63 0.61
 3 -7 -2 2.16 0.57
 -3 7 -2 3.02 0.57
 3 7 2 2.54 0.65
 3 7 2 2.7 0.68
 -3 7 -2 2.8 0.61
 -3 -7 2 3.07 0.52
 3 -7 -2 1.74 0.63
 -3 -7 2 3.69 0.72
 3 -7 2 2.73 0.29
 -3 7 2 1.89 0.6
 3 7 -2 2.4 0.59
 -3 -7 -2 3.31 0.71
 -3 7 2 3.04 0.56
 3 -7 2 3.15 0.61
 3 7 -2 2.39 0.69
 3 7 -2 2.38 0.55
 3 -7 2 2.6 0.66
 -3 -7 -2 2.95 0.57
 -3 -7 -2 3.2 0.65
 -3 7 2 2.22 0.64
 -3 8 -2 21.94 1.18
 3 -8 -2 25.91 1.26
 3 -8 2 27.06 1.27
 -3 -8 -2 26.94 1.27
 -3 9 -2 21.72 1.25
 -3 -9 2 20.64 1.34
 3 9 2 21.79 1.27
 3 -9 -2 21.77 1.25
 -3 9 -2 24.36 1.32
 3 9 2 19.82 1.34
 -3 -9 2 21.59 1.19
 3 -9 -2 20.06 1.29
 -3 9 -2 20.68 1.24
 3 9 2 20.32 1.37
 -3 -9 -2 21.75 1.32
 3 9 -2 20.61 1.26
 3 -9 2 21.61 0.85
 3 -9 2 22.58 1.29
 -3 -9 -2 21.59 1.24
 -3 9 2 20.77 1.22
 -3 9 2 20.7 1.31
 3 9 -2 22.37 1.31
 3 9 -2 22.05 1.3
 -3 9 2 21.39 1.3
 3 -9 2 23.64 1.29
 -3 10 -2 9.03 0.84
 3 -10 -2 10.99 0.99
 3 10 2 9.31 0.81
 -3 10 -2 11.34 0.93
 -3 -10 2 10.75 0.96
 3 10 2 10.83 0.95
 3 -10 -2 9.71 0.94
 3 10 2 9.57 0.89
 -3 10 -2 9.02 0.85
 -3 -10 2 10.65 0.88
 3 -10 2 8.94 0.74
 3 -10 2 9.59 0.9
 -3 10 2 9.84 0.94
 3 10 -2 8.56 0.87
 -3 -10 -2 8.88 0.94
 -3 -10 -2 10.03 0.86
 3 -10 2 10.9 0.87
 3 10 -2 9.32 0.89
 -3 10 2 9.5 0.9
 -3 10 2 10.06 0.78
 -3 -10 -2 11.13 0.96
 -3 -11 2 0.56 0.6
 -3 -11 2 1.29 0.82
 -3 -11 2 1.11 0.91
 -3 11 -2 1.26 0.83
 -3 11 -2 1.24 0.74
 3 11 2 1.26 0.88
 3 -11 -2 0.97 0.91
 -3 11 -2 0.42 0.85
 3 11 2 -0.68 0.92
 3 11 2 0.22 0.73
 -3 -11 -2 0.8 0.88
 -3 11 2 -0.25 0.85
 -3 -11 -2 1.72 0.75
 3 11 -2 -0.66 0.86
 3 11 -2 0.53 0.85
 -3 11 2 1.09 0.89
 3 -11 2 1.01 0.82
 -3 -11 -2 0.85 0.88
 3 -11 2 -0.51 0.85
 -3 -12 2 1.42 0.97
 -3 12 -2 4.67 1
 -3 -12 2 1.78 0.67
 3 -12 -2 3.01 0.9
 3 12 2 4.53 1.09
 3 12 2 3.79 0.87
 -3 -12 2 4.74 1
 -3 12 -2 3.27 1.48
 3 12 2 3.12 0.98
 -3 12 -2 4.75 0.99
 3 -12 -2 2.4 0.88
 -3 -12 -2 2.98 0.97
 3 -12 2 4.04 0.99
 3 -12 2 3.61 0.94
 3 -12 2 2.39 0.47
 -3 12 2 3.71 0.85
 3 12 -2 3.5 0.8
 3 12 -2 2.56 0.92
 3 12 -2 3.02 1.55
 -3 -12 -2 3.24 1
 3 -13 -2 -1.36 0.94
 -3 -13 2 1.34 1.08
 3 13 2 0.98 0.97
 3 13 2 1.06 1.01
 3 -13 -2 -0.37 0.97
 -3 13 -2 0.89 0.97
 -3 13 -2 -0.14 0.88
 -3 -13 2 -0.6 0.69
 3 13 -2 0.53 0.94
 -3 -13 -2 -0.3 0.92
 -3 -13 -2 0.78 0.71
 3 13 -2 -1.36 1.61
 -3 13 2 -1.14 0.94
 -3 -13 -2 -1.26 1.03
 3 -13 2 0.03 0.99
 -3 13 2 1 0.82
 -3 13 2 -0.22 0.93
 3 13 -2 0.85 0.83
 -3 -13 -2 -0.01 1.02
 3 -14 -2 0.71 1.06
 3 14 2 2.65 1.11
 3 -14 -2 2.18 1.03
 -3 -14 2 0.89 0.75
 3 14 2 1.01 1.11
 3 14 2 0.57 0.97
 -3 14 -2 1.32 0.92
 -3 -14 2 3.09 1.12
 3 -14 -2 0.73 0.6
 -3 14 -2 1.5 1.85
 -3 14 -2 -0.72 1.04
 -3 -14 -2 -1.17 1.03
 -3 14 2 0.83 0.91
 -3 14 2 -0.43 1.16
 3 14 -2 -0.44 0.92
 -3 14 2 0.09 1.05
 3 14 -2 0.9 1.04
 -3 -14 -2 -1 1.05
 3 -14 2 0.75 0.52
 3 14 -2 0.48 0.98
 -3 15 -2 5.28 1.23
 3 -15 -2 3.22 1.16
 -3 -15 2 4.96 1.19
 -3 15 -2 4.53 1.09
 -3 15 -2 4.6 1.19
 -3 -15 2 4.42 1.08
 -3 -15 2 3.42 0.86
 3 -15 -2 1.56 0.67
 3 15 2 5.45 1.27
 3 -15 -2 3.38 1.19
 3 15 -2 2.52 1.1
 3 -15 2 4.54 1.19
 -3 -15 -2 3.65 0.87
 3 15 -2 2.42 1.21
 -3 15 2 1.62 1.12
 -3 -15 -2 1.69 1.27
 3 -15 2 2.85 1.22
 3 -15 2 2.47 0.6
 -3 -15 -2 2.34 1.24
 -3 16 -2 -1.34 1.1
 3 -16 -2 1.37 0.69
 -3 16 -2 -1.54 1.24
 3 -16 -2 0.96 1.3
 -3 -16 2 -0.18 0.82
 3 16 2 0.5 1.22
 3 -16 -2 -0.33 1.26
 -3 -16 2 1.11 1.29
 -3 16 -2 1.47 1.25
 -3 16 2 1.48 1.37
 3 16 -2 -0.8 1.34
 -3 -16 -2 -0.18 1.36
 3 16 -2 0.37 1.29
 3 -16 2 -1.22 1.32
 -3 -16 -2 2.57 1.28
 3 16 -2 0.36 1.14
 -3 16 2 -0.52 1.17
 -3 -16 -2 -1.36 0.9
 3 -16 2 0.19 0.55
 3 -17 -2 1.65 1.36
 3 -17 -2 0.8 1.39
 -3 -17 2 -0.8 1.38
 -3 -17 2 0.96 0.96
 -3 -17 2 -0.44 1.22
 3 17 2 -0.36 1.46
 3 -17 -2 -0.01 0.73
 3 17 2 1.13 1.39
 -3 17 -2 -0.61 1.25
 3 17 -2 0.68 1.37
 -3 17 2 -0.33 1.26
 3 17 -2 -0.57 1.36
 -3 -17 -2 0.49 1.45
 -3 17 2 0.85 1.46
 -3 -17 -2 2.18 0.9
 3 -17 2 0.91 1.38
 -3 17 2 0.94 1.39
 4 0 -2 97.55 2.41
 -4 0 -2 97.75 2.45
 -4 0 2 93.02 2.41
 -4 0 2 95.7 2.42
 -4 0 2 101.41 2.51
 4 0 -2 97.12 2.37
 -4 0 2 92.28 2.38
 4 0 -2 100 2.5
 4 1 2 131.02 3.2
 -4 -1 2 124.27 3.17
 -4 1 2 126.34 3.19
 -4 -1 -2 129.35 3.21
 4 1 -2 127.67 3.17
 4 -2 -2 0.01 0.34
 -4 2 -2 0.04 0.22
 -4 -2 2 0.45 0.4
 -4 -2 2 0.51 0.35
 4 -2 -2 0.49 0.35
 4 2 2 0.27 0.36
 -4 -2 2 -0.02 0.41
 4 2 2 0.35 0.36
 4 2 2 -0.09 0.37
 4 -2 -2 0.16 0.28
 -4 2 -2 0.44 0.31
 -4 -2 2 0.17 0.39
 4 2 -2 0.38 0.33
 -4 -2 -2 -0.26 0.37
 -4 -2 -2 0.21 0.38
 4 2 -2 0.71 0.37
 -4 -2 -2 0.46 0.37
 -4 2 2 0.34 0.35
 4 2 -2 -0.05 0.39
 -4 2 2 0.75 0.26
 -4 2 2 0.42 0.36
 4 -2 2 -0.04 0.31
 -4 -3 2 9.07 0.69
 -4 -3 2 11.22 0.82
 -4 3 -2 9.41 0.63
 4 3 2 9.34 0.72
 -4 -3 2 9.82 0.76
 4 -3 -2 10.27 0.71
 -4 -3 2 9.67 0.75
 -4 3 -2 8.78 0.63
 4 3 2 8.18 0.71
 4 -3 -2 9.94 0.57
 4 3 2 9.46 0.74
 4 -3 -2 8.74 0.67
 4 3 -2 8.77 0.72
 -4 -3 -2 9.31 0.73
 -4 3 2 8.88 0.7
 -4 -3 -2 8.51 0.71
 4 -3 2 9.09 0.63
 4 3 -2 11.21 0.85
 -4 3 2 10.11 0.7
 4 -3 2 9.9 0.64
 4 3 -2 10.19 0.67
 -4 -3 -2 10.04 0.74
 4 3 -2 9.39 0.73
 -4 3 2 9.97 0.57
 -4 -4 2 5.65 0.5
 -4 -4 2 4.62 0.5
 4 -4 -2 6.18 0.5
 -4 -4 2 6.29 0.57
 4 4 2 5.81 0.56
 4 -4 -2 5.39 0.5
 4 4 2 5.79 0.51
 4 4 2 5.34 0.56
 -4 4 -2 5.51 0.5
 -4 -4 2 4.77 0.46
 -4 4 2 6.46 0.54
 -4 4 2 5.54 0.48
 4 4 -2 5.57 0.54
 4 4 -2 6 0.55
 -4 4 2 5.19 0.42
 4 4 -2 5.24 0.49
 4 -4 2 5.87 0.5
 -4 -4 -2 4.87 0.51
 4 -5 -2 51.84 1.43
 4 5 2 51.47 1.64
 4 5 2 54.92 1.62
 -4 -5 2 56.74 1.68
 -4 -5 2 54.97 1.64
 4 -5 -2 53.08 1.6
 4 5 2 53 1.64
 -4 5 -2 51.75 1.58
 -4 -5 2 52.36 1.64
 -4 5 -2 49.45 1.59
 -4 -5 2 52.95 1.64
 -4 5 2 53.36 1.6
 4 5 -2 53.01 1.63
 -4 5 2 55.57 1.55
 4 -5 2 51.95 1.6
 -4 -5 -2 52.27 1.62
 4 5 -2 53.15 1.62
 -4 -5 -2 55.03 1.65
 -4 -5 -2 54.59 1.64
 -4 5 2 53.35 1.62
 4 -5 2 53.06 1.59
 -4 -6 2 4.85 0.66
 4 -6 -2 4.25 0.57
 4 6 2 4.74 0.63
 4 6 2 4.25 0.61
 -4 6 -2 3.53 0.61
 4 6 2 3.52 0.57
 -4 -6 2 3.59 0.51
 4 -6 -2 4.99 0.64
 -4 -6 2 3.49 0.61
 -4 -6 2 4.23 0.57
 -4 -6 -2 3.92 0.66
 -4 -6 -2 3.93 0.61
 4 6 -2 4.35 0.64
 4 -6 2 3.8 0.57
 -4 6 2 4.13 0.59
 -4 6 2 3.62 0.59
 4 6 -2 3.64 0.56
 4 6 -2 3.99 0.64
 4 -6 2 4.77 0.58
 -4 -6 -2 4.96 0.57
 -4 6 2 3.43 0.5
 -4 -7 2 55.13 1.8
 -4 -7 2 57.15 1.81
 -4 7 -2 59.03 1.77
 4 -7 -2 60.26 1.78
 -4 7 -2 53.86 1.72
 4 7 2 58.12 1.84
 4 -7 -2 52.66 1.76
 -4 7 -2 54.89 1.75
 4 7 2 53.99 1.81
 4 -7 -2 57.5 1.56
 4 7 2 53.81 1.8
 -4 -7 2 54.26 1.8
 4 -7 2 58.33 1.77
 -4 -7 -2 56.79 1.81
 -4 -7 -2 54.05 1.79
 4 7 -2 57.52 1.8
 4 7 -2 55.17 1.84
 -4 7 2 57.87 1.78
 4 -7 2 58.57 1.77
 -4 -7 -2 55.67 1.81
 -4 7 2 57.66 1.78
 4 7 -2 55.07 1.78
 -4 8 -2 0.24 0.57
 4 -8 -2 0.32 0.59
 -4 -8 2 0.59 0.63
 -4 8 -2 1.06 0.61
 4 -8 -2 0.18 0.59
 -4 -8 2 0.75 0.49
 -4 -8 2 -0.78 0.61
 4 8 2 0.09 0.66
 4 8 2 -0.87 0.64
 -4 -8 2 0.59 0.61
 4 8 2 1.38 0.61
 -4 8 -2 0.07 0.56
 4 8 -2 -0.64 0.63
 -4 -8 -2 -0.15 0.61
 -4 -8 -2 -0.09 0.58
 -4 8 2 0.33 0.64
 -4 8 2 0.06 0.54
 4 8 -2 0.7 0.59
 -4 8 2 0.73 0.64
 4 -8 2 -0.03 0.58
 4 -8 2 0.02 0.6
 4 8 -2 -0.78 0.55
 4 9 2 5.01 0.83
 -4 -9 2 3.79 0.59
 4 -9 -2 4.62 0.78
 -4 9 -2 4.82 0.74
 -4 9 -2 3.7 0.66
 4 9 2 4.27 0.78
 -4 -9 2 6.48 0.81
 -4 -9 2 5.52 0.74
 -4 -9 2 6.43 0.87
 4 9 2 4.73 0.71
 -4 9 -2 4.6 0.73
 4 9 -2 5.48 0.73
 4 9 -2 3.98 0.7
 -4 -9 -2 5.09 0.72
 -4 -9 -2 5.3 0.78
 4 9 -2 4.68 0.71
 4 -9 2 5.58 0.79
 -4 9 2 4.01 0.65
 -4 9 2 5.78 0.74
 4 -9 2 5.83 0.8
 -4 9 2 3.89 0.72
 4 10 2 1.12 0.66
 -4 -10 2 0.16 0.72
 -4 10 -2 -1.13 0.67
 -4 10 -2 -0.58 0.77
 -4 10 -2 -0.42 0.66
 4 10 2 -0.37 0.8
 4 -10 -2 -0.16 0.73
 4 -10 -2 0.75 0.73
 -4 -10 2 -0.53 0.56
 -4 -10 2 0.82 0.69
 -4 -10 2 1.51 0.8
 4 10 2 -0.5 0.72
 4 -10 2 -0.44 0.72
 4 10 -2 0.21 0.7
 -4 10 2 0.21 0.73
 -4 -10 -2 -0.25 0.77
 -4 -10 -2 1.06 0.79
 -4 10 2 1.17 0.65
 4 10 -2 -0.5 0.75
 -4 -10 -2 0.02 0.66
 -4 10 2 1.23 0.77
 4 10 -2 -0.17 0.75
 4 -10 2 -1.13 0.75
 4 11 2 62.39 2.33
 -4 11 -2 64.14 2.25
 4 11 2 67.92 2.31
 4 -11 -2 62 2.27
 -4 -11 2 65.85 2.19
 -4 11 -2 68.54 2.29
 4 11 2 63.53 2.33
 -4 -11 2 66.18 2.33
 -4 11 -2 64.63 2.23
 -4 -11 2 70.38 2.33
 -4 -11 -2 63.29 2.33
 4 11 -2 64.37 2.27
 4 11 -2 67.95 2.31
 -4 11 2 65.25 2.33
 -4 -11 -2 63.29 2.32
 4 11 -2 67.06 2.3
 -4 11 2 66.24 2.2
 -4 -11 -2 63.01 2.23
 4 -11 2 69.33 2.26
 4 -11 2 67.37 2.28
 -4 11 2 63.99 2.28
 -4 -12 2 -0.39 1.11
 -4 12 -2 0.76 0.83
 4 -12 -2 1.64 0.88
 4 12 2 0.93 0.99
 -4 -12 2 1.2 0.98
 -4 12 -2 1.72 0.92
 4 -12 -2 -0.25 0.88
 -4 12 -2 -0.06 0.92
 -4 -12 2 -0.05 0.7
 4 12 2 0.67 0.95
 -4 12 2 0.46 0.8
 -4 12 2 1.76 0.98
 4 -12 2 0.83 0.4
 4 12 -2 1.28 0.8
 4 12 -2 1.45 1.03
 -4 -12 -2 1.05 0.84
 4 -12 2 0.46 0.95
 4 12 -2 0.98 0.86
 -4 12 2 1.74 0.9
 -4 -12 -2 0 0.93
 4 -12 2 -0.19 0.95
 4 13 2 21.05 1.8
 -4 13 -2 21.46 1.72
 -4 -13 2 21.21 1.56
 -4 13 -2 20.3 1.68
 -4 -13 2 22.56 1.8
 4 -13 -2 18.68 1.33
 -4 -13 2 21.62 1.76
 4 13 2 19.99 1.39
 -4 13 -2 20.83 1.57
 4 -13 -2 20.43 1.7
 -4 13 2 21.33 1.77
 4 13 -2 17.25 1.28
 -4 13 2 20.13 1.4
 -4 -13 -2 20.08 1.55
 4 -13 2 21.49 1.74
 4 -13 2 20.27 1.73
 4 13 -2 18.78 1.66
 -4 -13 -2 20.02 1.3
 4 13 -2 21.51 1.45
 4 -13 2 18.37 0.97
 -4 -13 -2 20.14 1.38
 -4 13 2 18.87 1.59
 4 14 2 2.77 1.2
 4 14 2 -0.44 1.08
 -4 14 -2 -0.66 1.04
 4 -14 -2 0.06 1.13
 -4 14 -2 2.27 1.09
 -4 -14 2 0.83 0.79
 4 14 2 1.85 1.04
 -4 -14 2 0.21 1.11
 4 -14 -2 0.62 1.04
 -4 -14 -2 1.59 1.09
 4 14 -2 -0.42 1
 -4 -14 -2 0.3 1
 4 14 -2 1.39 1.11
 4 -14 2 1.32 1.12
 -4 -14 -2 -1.2 1.1
 -4 14 2 0.26 1.69
 -4 14 2 1.55 1.05
 -4 14 2 1.17 0.87
 4 15 2 5.77 1.24
 -4 15 -2 4.11 1.2
 4 15 2 7.46 1.3
 -4 -15 2 7.45 1.41
 4 15 2 7.21 1.32
 4 -15 -2 5.11 0.67
 4 -15 -2 7.56 1.37
 -4 -15 2 5.24 0.9
 -4 15 2 4.47 1.11
 4 -15 2 6.88 1.5
 -4 15 2 8.25 1.36
 -4 -15 -2 8.69 1.3
 -4 -15 -2 4.86 0.96
 4 -15 2 8.32 1.21
 4 15 -2 4.22 1.17
 -4 15 2 6.17 1.23
 -4 16 -2 -0.38 1.23
 4 16 2 1.47 1.3
 4 -16 -2 -0.06 1.26
 4 -16 -2 1.16 0.61
 -4 16 -2 1.39 1.15
 4 16 2 1.07 1.22
 4 -16 -2 -1.34 1.24
 -4 -16 2 0.52 1.25
 4 16 2 -0.04 1.24
 4 -16 2 0.64 1.2
 -4 16 2 1.26 1.34
 -4 -16 -2 0.3 0.94
 4 16 -2 0.21 1.12
 -4 16 2 1.06 1.33
 4 -16 2 1.62 1.13
 -4 -16 -2 -1.54 1.3
 4 16 -2 2.08 1.26
 4 16 -2 0.84 1.29
 4 -17 -2 3.39 1.4
 -4 17 -2 5.78 1.47
 4 17 2 2.45 1.5
 -4 17 -2 3.01 1.28
 -4 17 2 3.47 1.41
 -4 17 2 0.83 1.26
 4 17 -2 5.99 1.49
 -4 -17 -2 3.57 1.45
 4 -17 2 3.23 1.48
 -5 0 2 187.98 4.64
 5 0 -2 192.02 4.63
 -5 0 2 192.9 4.72
 -5 0 2 193.35 4.64
 5 0 -2 192.86 4.64
 -5 0 -2 193.32 4.69
 5 0 -2 181.99 4.72
 -5 -1 2 22.49 0.78
 5 1 2 22.12 0.83
 5 -1 -2 21.34 0.86
 5 1 2 21.39 0.71
 5 -1 -2 23.75 0.73
 -5 -1 2 20.8 0.95
 -5 -1 -2 21.98 0.69
 5 1 -2 22.62 0.76
 -5 -1 -2 22.64 0.85
 -5 1 2 22.85 0.83
 -5 1 2 21.82 0.64
 5 1 -2 20.12 0.98
 5 1 -2 22.5 0.78
 -5 1 2 23.68 0.73
 -5 2 -2 10.7 0.53
 5 2 2 9.74 0.61
 5 2 2 9.93 0.61
 5 -2 -2 9.92 0.64
 -5 2 -2 8.94 0.5
 5 -2 -2 9.49 0.57
 5 -2 -2 10.04 0.6
 -5 -2 2 9.6 0.66
 -5 -2 2 11.05 0.82
 5 2 2 9.84 0.68
 -5 -2 2 9.39 0.66
 -5 2 2 9.41 0.59
 -5 2 2 9.18 0.58
 5 2 -2 10.69 0.83
 5 2 -2 9.74 0.66
 5 2 -2 9.06 0.66
 -5 -2 -2 9.9 0.62
 -5 -2 -2 10.55 0.69
 -5 -2 -2 9.72 0.6
 5 2 -2 10.38 0.6
 -5 2 2 9.18 0.58
 5 -2 2 9.53 0.51
 -5 3 -2 111.08 2.78
 5 -3 -2 107.51 2.79
 -5 3 -2 110.31 2.77
 5 -3 -2 107.53 2.8
 5 3 2 109.93 2.82
 -5 -3 2 114.71 2.84
 5 -3 -2 112.19 2.78
 -5 -3 2 114.45 2.91
 -5 -3 2 110.36 2.84
 -5 -3 2 110.6 2.83
 5 3 2 109.97 2.86
 5 3 2 112.1 2.82
 -5 -3 -2 111.96 2.86
 -5 -3 -2 116.04 2.83
 -5 3 2 107.66 2.76
 5 3 -2 113.91 2.83
 5 3 -2 108.14 2.84
 -5 3 2 109.37 2.8
 -5 3 2 110.18 2.8
 5 3 -2 110.31 2.83
 5 -3 2 109.18 2.78
 -5 -3 -2 107.99 2.81
 5 3 -2 113.69 2.92
 -5 -4 2 19.3 1.02
 5 -4 -2 20.9 0.73
 5 4 2 18.97 0.95
 -5 4 -2 19.9 0.87
 5 -4 -2 20.62 0.9
 -5 4 -2 18.84 0.86
 -5 -4 2 19.42 0.94
 5 4 2 20.02 0.94
 -5 -4 2 21.79 0.95
 5 4 2 20.24 0.95
 5 -4 -2 19.96 0.87
 -5 4 2 19.48 0.89
 -5 -4 -2 19.54 0.95
 5 -4 2 18.74 0.85
 -5 4 2 21.24 0.9
 -5 -4 -2 20.87 0.95
 5 4 -2 19.97 0.94
 -5 -4 -2 19.27 0.92
 5 4 -2 17.96 0.92
 5 -4 2 19.84 0.86
 -5 4 2 18.39 0.79
 5 4 -2 17.74 0.96
 -5 -5 2 13.2 0.94
 5 -5 -2 11.9 0.86
 -5 -5 2 13.16 0.98
 5 5 2 13.84 0.94
 5 -5 -2 12.97 0.87
 -5 5 -2 13.8 0.86
 -5 -5 2 12.56 0.95
 -5 -5 2 12.99 0.93
 5 -5 -2 13.14 0.64
 5 5 2 14.03 0.94
 5 -5 2 11.54 0.85
 -5 5 2 11.49 0.76
 -5 -5 -2 12.59 0.95
 -5 5 2 12.85 0.88
 5 5 -2 12.15 0.92
 5 -5 2 13.26 0.87
 -5 -5 -2 12.43 0.92
 5 5 -2 12.52 0.91
 -5 5 2 12.36 0.88
 -5 -5 -2 13.59 0.93
 5 -6 -2 1.92 0.3
 5 -6 -2 2.82 0.6
 -5 -6 2 2.04 0.59
 -5 -6 2 2.11 0.5
 -5 6 -2 1.66 0.53
 5 6 2 2.15 0.58
 -5 -6 2 2.28 0.57
 5 6 2 1.64 0.6
 -5 6 -2 2.11 0.55
 -5 -6 2 2.51 0.65
 5 6 2 2.08 0.55
 -5 -6 -2 1.84 0.56
 5 -6 2 2.27 0.57
 5 6 -2 1.5 0.54
 5 6 -2 1.51 0.53
 -5 -6 -2 0.84 0.56
 -5 6 2 2.13 0.48
 5 -6 2 1.77 0.54
 -5 6 2 1.88 0.56
 -5 6 2 2.84 0.58
 5 6 -2 1.71 0.61
 -5 7 -2 55.36 1.72
 5 -7 -2 53.06 1.49
 5 7 2 54.47 1.77
 -5 -7 2 55.71 1.78
 5 7 2 51.25 1.78
 -5 -7 2 54.6 1.78
 -5 7 -2 55.13 1.73
 5 7 2 54.27 1.77
 5 -7 -2 53.37 1.73
 5 -7 -2 54.22 1.73
 -5 -7 2 57.16 1.79
 -5 -7 2 55.22 1.78
 -5 7 2 51.65 1.73
 -5 7 2 55.07 1.68
 5 7 -2 54.69 1.8
 5 7 -2 55.94 1.75
 -5 -7 -2 51.43 1.76
 5 -7 2 54.49 1.72
 5 -7 2 56.37 1.73
 5 7 -2 54.02 1.76
 -5 7 2 54.53 1.72
 -5 -7 -2 55.71 1.77
 -5 -8 2 6.45 0.69
 -5 -8 2 5.32 0.6
 5 8 2 6.71 0.77
 5 8 2 6.09 0.76
 -5 -8 2 6.31 0.69
 -5 -8 2 8.02 0.83
 -5 8 -2 6.83 0.65
 5 -8 -2 6.2 0.68
 5 8 2 6.38 0.69
 5 -8 -2 7.12 0.7
 -5 8 -2 7.55 0.74
 -5 8 -2 6.2 0.67
 -5 -8 -2 6.3 0.69
 -5 8 2 6.08 0.7
 -5 8 2 6.3 0.62
 -5 -8 -2 6.22 0.76
 5 -8 2 7.73 0.72
 5 8 -2 5.72 0.71
 5 -8 2 7.18 0.71
 5 8 -2 6.3 0.7
 5 8 -2 8.08 0.77
 -5 8 2 6.71 0.69
 -5 9 -2 35.1 1.49
 5 9 2 36.35 1.54
 -5 9 -2 33.18 1.47
 5 9 2 36.85 1.59
 -5 -9 2 38.34 1.6
 5 9 2 36.91 1.59
 5 -9 -2 36.39 1.53
 -5 9 -2 36.94 1.53
 5 -9 -2 34.38 1.5
 -5 -9 2 39.65 1.58
 -5 -9 2 35.12 1.56
 5 -9 -2 34.78 1.18
 -5 9 2 34.76 1.44
 -5 9 2 34.24 1.53
 5 9 -2 34.98 1.51
 -5 -9 -2 36.57 1.53
 -5 -9 -2 34.79 1.58
 5 -9 2 35.99 1.51
 -5 -9 -2 34.09 1.54
 -5 9 2 36.46 1.54
 5 9 -2 37.47 1.58
 5 9 -2 36.99 1.54
 5 -9 2 38.2 1.53
 5 10 2 9.17 0.95
 5 -10 -2 9.01 0.87
 -5 -10 2 8.9 0.87
 -5 -10 2 10.29 0.94
 5 10 2 8.28 0.87
 -5 10 -2 7.58 0.83
 -5 10 -2 8.56 0.82
 -5 10 -2 9.55 0.88
 5 -10 -2 8.66 0.91
 5 10 2 8.77 0.96
 -5 -10 2 9.26 0.89
 5 -10 2 9.1 0.86
 -5 10 2 8.91 0.8
 -5 -10 -2 7.13 0.92
 5 10 -2 10.42 0.93
 5 -10 2 8.93 0.86
 -5 10 2 8.35 0.88
 -5 -10 -2 8.09 0.86
 -5 10 2 8.94 0.94
 5 10 -2 8.47 0.91
 -5 -10 -2 8.51 0.94
 5 10 -2 9.75 0.91
 -5 -11 2 3.12 0.94
 -5 11 -2 1.14 0.81
 5 11 2 2.74 1.11
 5 11 2 2.24 0.93
 5 11 2 2.36 0.97
 5 -11 -2 1.9 0.47
 -5 -11 2 2.57 0.88
 -5 11 -2 1.58 0.76
 -5 -11 2 3.36 0.92
 5 -11 -2 3.63 0.96
 -5 -11 -2 2.81 0.94
 5 -11 2 1.61 1.3
 5 11 -2 3.34 1.01
 -5 -11 -2 2.63 0.94
 5 -11 2 2.05 0.85
 -5 11 2 3.59 0.9
 -5 -11 -2 3.26 0.81
 5 11 -2 1.78 0.79
 -5 11 2 2.25 0.85
 -5 11 2 2.54 0.77
 5 11 -2 2.78 0.92
 5 12 2 0.53 0.88
 5 12 2 2.35 0.95
 5 12 2 -0.12 0.97
 5 -12 -2 1.19 0.88
 -5 12 -2 1.64 0.92
 -5 -12 2 0.29 0.93
 -5 -12 2 1.52 0.89
 -5 12 -2 0.59 1
 5 -12 -2 1.11 0.99
 5 12 -2 1.77 0.92
 -5 12 2 1.54 0.88
 -5 -12 -2 0.88 1.02
 -5 -12 -2 -0.06 0.71
 5 12 -2 -0.64 1.01
 -5 -12 -2 0.33 0.92
 -5 -12 -2 0.62 0.87
 5 -12 2 0.66 0.85
 5 -12 2 1.07 0.88
 -5 12 2 1 0.99
 -5 12 2 2.57 0.8
 5 -13 -2 5.49 1.07
 5 -13 -2 4.7 1.06
 -5 13 -2 5.63 1.09
 5 13 2 6.87 1.07
 5 13 2 6.19 1.13
 -5 -13 2 5.44 0.82
 5 13 2 3.33 1.1
 -5 13 -2 6.21 1
 5 -13 -2 4.77 0.56
 -5 -13 2 6.57 1.13
 -5 13 2 3.87 1.06
 -5 -13 -2 5.71 1.02
 -5 13 2 5.99 1.02
 -5 -13 -2 4.53 1.05
 5 13 -2 3.49 1.01
 5 -13 2 7.4 1.15
 5 13 -2 4.37 0.99
 -5 13 2 5.34 0.95
 -5 -13 -2 4.72 1.16
 5 13 -2 4.28 1.08
 5 -13 2 5.44 1.07
 -5 14 -2 0.8 1.06
 5 -14 -2 1.15 0.55
 5 14 2 0.47 1.12
 -5 -14 2 3.14 1.1
 -5 14 -2 3.15 1.18
 5 -14 -2 0.45 0.53
 -5 14 -2 2.3 1.01
 5 -14 -2 2.49 1.18
 5 -14 -2 0.49 1.12
 5 14 2 -0.46 1.02
 -5 -14 2 2.38 1.14
 -5 -14 2 1.77 0.82
 -5 -14 -2 1.12 1.04
 -5 14 2 1.57 1.13
 5 14 -2 3.23 1.13
 -5 -14 -2 1.29 1.1
 -5 14 2 1.25 1.03
 -5 -14 -2 -0.34 1.1
 -5 -14 -2 0.95 0.83
 5 14 -2 2.65 1.05
 5 14 -2 0.66 1
 5 -14 2 2.73 1.03
 5 -14 2 3.36 1.12
 5 -15 -2 -1.03 1.31
 5 15 2 0.33 1.12
 -5 -15 2 1.58 1.12
 -5 -15 2 0.4 0.9
 -5 15 -2 -0.16 1.16
 5 -15 -2 1.18 0.58
 5 15 2 2.96 1.28
 5 15 2 0.28 1.12
 5 -15 -2 1.78 1.2
 5 -15 2 -0.17 1.35
 5 15 -2 2.35 1.14
 5 15 -2 1.65 1.2
 5 15 -2 0.05 1.21
 -5 15 2 0.42 0.96
 -5 15 2 3.39 1.27
 -5 -15 -2 0.87 1.16
 -5 -15 -2 0.7 0.9
 5 -16 -2 0.32 1.32
 -5 -16 2 0.88 1.21
 -5 16 -2 3.8 1.3
 -5 -16 2 1.96 1.29
 -5 -16 2 1.05 0.98
 5 16 2 1.24 1.34
 -5 16 -2 2.44 1.3
 5 16 2 1.28 1.18
 5 -16 -2 2.57 0.58
 5 -16 -2 0.72 1.33
 -5 16 2 1.24 1.31
 5 -16 2 2.43 1.36
 5 16 -2 -0.53 1.3
 5 16 -2 1.19 1.21
 -5 -16 -2 2 1.34
 5 16 -2 2.47 1.19
 -5 16 2 -0.68 1.07
 -5 -16 -2 3.32 1.33
 -5 -16 -2 1.7 0.98
 5 -16 2 2.57 1.38
 6 0 -2 70.93 2.04
 -6 0 2 76.85 2.04
 6 0 -2 73.66 1.89
 6 0 -2 78.1 1.91
 -6 0 2 77.32 1.9
 -6 0 2 73.99 1.91
 -6 0 -2 75.79 1.97
 -6 -1 2 36.57 1.24
 -6 -1 2 35.86 1.06
 6 -1 -2 36.71 1.18
 -6 1 2 36.2 1.13
 -6 -1 -2 36.18 1.12
 -6 1 2 36.06 0.97
 -6 -2 2 56.2 1.53
 -6 2 -2 54.99 1.5
 -6 -2 2 55.88 1.54
 6 2 2 55.92 1.58
 -6 -2 2 58.39 1.68
 6 -2 -2 56.19 1.56
 6 2 2 57.9 1.5
 6 -2 -2 54.59 1.49
 -6 2 2 55.43 1.52
 6 2 -2 59.7 1.71
 6 2 -2 56.25 1.54
 6 2 -2 56.48 1.53
 -6 2 2 55.43 1.49
 -6 -2 -2 54.92 1.5
 6 2 -2 54.5 1.53
 -6 -2 -2 55.39 1.59
 -6 2 2 53.42 1.48
 -6 -3 2 17.7 0.86
 6 3 2 18.72 0.85
 -6 3 -2 19.84 0.72
 -6 -3 2 17.64 1
 6 -3 -2 18.43 0.81
 -6 3 -2 19.16 0.72
 -6 -3 2 18.5 0.86
 6 -3 -2 18.46 0.77
 6 3 2 17.15 0.88
 6 -3 -2 18.45 0.76
 6 3 2 19.05 0.85
 -6 3 -2 19.7 0.65
 -6 -3 -2 18.31 0.81
 6 3 -2 18.52 0.83
 6 3 -2 18.29 0.86
 -6 3 2 18.13 0.76
 -6 3 2 17.16 0.79
 -6 -3 -2 18.18 0.91
 6 3 -2 17.32 0.89
 6 -3 2 18.62 0.72
 6 -4 -2 10.6 0.62
 -6 -4 2 10.35 0.83
 6 4 2 9.96 0.84
 6 4 2 9.35 0.83
 6 -4 -2 8.99 0.77
 6 4 2 11.23 0.83
 -6 4 -2 8.63 0.7
 -6 -4 2 10.58 0.86
 -6 -4 2 9.75 0.83
 -6 4 -2 9.97 0.71
 6 -4 -2 10.8 0.73
 -6 -4 -2 9.05 0.82
 6 4 -2 10.23 0.77
 -6 4 2 8.85 0.75
 6 -4 2 10.01 0.72
 6 4 -2 9.43 0.83
 6 -4 2 9.16 0.72
 6 4 -2 8.92 0.65
 -6 4 2 8.44 0.76
 -6 -4 -2 9.89 0.8
 6 5 2 89.06 2.44
 -6 5 -2 88.69 2.37
 -6 -5 2 91 2.51
 -6 5 -2 86.26 2.36
 -6 -5 2 90.14 2.44
 6 -5 -2 87.24 2.37
 6 -5 -2 90.67 2.28
 6 5 2 89.8 2.43
 6 -5 -2 85.29 2.37
 -6 -5 2 88.34 2.44
 6 5 2 89.02 2.44
 -6 -5 2 91.68 2.45
 -6 -5 -2 85.15 2.42
 6 -5 2 88.8 2.37
 6 -5 2 89.99 2.38
 6 5 -2 89.75 2.43
 -6 -5 -2 90.83 2.46
 6 5 -2 89.19 2.44
 -6 5 2 89.53 2.4
 -6 5 2 88.37 2.39
 -6 5 2 89.05 2.34
 6 5 -2 92.71 2.44
 6 6 2 23.93 1.19
 6 -6 -2 25.22 1.09
 6 -6 -2 25.28 0.85
 -6 -6 2 23.85 1.17
 -6 6 -2 23.09 1.08
 6 6 2 26.18 1.15
 -6 6 -2 26.14 1.11
 -6 -6 2 24.69 1.15
 -6 -6 2 26.12 1.23
 6 6 2 25.51 1.17
 6 6 -2 25.8 1.17
 6 -6 2 22.72 1.07
 6 6 -2 22.63 1.15
 -6 -6 -2 23.31 1.15
 6 6 -2 25.41 1.2
 6 -6 2 25.5 1.1
 -6 6 2 25.24 1.01
 -6 6 2 24.28 1.1
 -6 6 2 25.35 1.09
 -6 -6 -2 25.09 1.18
 6 -7 -2 24.78 1.18
 6 7 2 25.31 1.26
 6 -7 -2 24.19 1.19
 6 7 2 25.12 1.24
 -6 7 -2 25.06 1.15
 -6 7 -2 27.68 1.18
 -6 -7 2 25.62 1.23
 -6 -7 2 24.3 1.25
 6 7 2 26.84 1.24
 6 -7 -2 24.74 0.87
 -6 -7 2 26.71 1.25
 -6 -7 2 24.28 1.27
 -6 -7 -2 25.17 1.23
 6 -7 2 27.07 1.19
 6 -7 2 25.42 1.16
 6 7 -2 23.59 1.28
 6 7 -2 24.19 1.22
 -6 7 2 24.86 1.17
 -6 7 2 24.3 1.19
 6 7 -2 24.93 1.2
 -6 -7 -2 23.53 1.23
 -6 -7 -2 26.8 1.24
 -6 7 2 24.31 1.1
 -6 -8 2 9.71 0.82
 6 -8 -2 9.01 0.76
 6 -8 -2 8.52 0.75
 6 8 2 7.96 0.79
 6 8 2 9.5 0.78
 -6 -8 2 9.88 0.77
 -6 -8 2 9.53 0.77
 -6 8 -2 9.36 0.74
 6 8 2 8.77 0.77
 -6 -8 2 8.37 0.69
 6 8 -2 7.89 0.76
 6 8 -2 8.84 0.85
 -6 -8 -2 9.62 0.85
 -6 -8 -2 8.2 0.77
 -6 -8 -2 9.75 0.83
 6 8 -2 10.12 0.82
 -6 8 2 7.67 0.78
 6 9 2 10.62 0.91
 -6 -9 2 12.21 0.97
 -6 9 -2 10.73 0.85
 6 -9 -2 10.86 0.87
 6 -9 -2 11.01 0.87
 6 9 2 9.66 0.87
 -6 -9 2 10.39 0.88
 6 9 2 11.54 0.93
 -6 -9 2 12.31 1
 6 -9 2 11.37 0.87
 -6 9 2 12.17 0.94
 -6 -9 -2 12.13 0.91
 -6 -9 -2 9.04 0.84
 -6 9 2 11.39 0.87
 -6 9 2 9.62 0.77
 -6 -9 -2 11.05 0.91
 6 9 -2 11.71 0.96
 6 9 -2 9.82 0.85
 6 10 2 2.13 0.89
 6 -10 -2 2.41 0.84
 -6 -10 2 4.57 0.84
 -6 -10 2 2.77 0.66
 -6 -10 2 4.01 0.85
 -6 10 -2 2.45 0.81
 6 10 2 3.29 0.81
 6 -10 -2 3.46 0.81
 6 -10 -2 3.3 0.41
 -6 -10 2 2.4 0.83
 6 10 2 4.92 0.86
 -6 -10 -2 2.69 0.85
 -6 10 2 3.16 0.72
 -6 10 2 3 0.86
 -6 -10 -2 4.11 0.8
 6 -10 2 4.14 0.8
 -6 -10 -2 2.58 0.87
 -6 10 2 4.06 0.86
 6 -10 2 3.31 0.83
 6 10 -2 3.51 0.87
 6 10 -2 3.68 0.77
 6 10 -2 2.63 0.81
 6 11 2 34.19 1.7
 -6 11 -2 33.13 1.67
 -6 11 -2 30.78 1.64
 6 11 2 28.93 1.77
 6 -11 -2 28.75 1.66
 -6 -11 2 32.97 1.74
 6 11 2 28.89 1.93
 -6 -11 2 32.02 1.76
 -6 11 -2 27.97 1.54
 -6 -11 -2 31.6 1.77
 -6 11 2 28.5 1.65
 -6 -11 -2 29.58 2.14
 6 -11 2 33.1 1.67
 -6 -11 -2 30.52 1.74
 -6 11 2 31.91 1.58
 6 11 -2 31.14 1.7
 -6 -11 -2 30.65 1.68
 6 -11 2 32.99 1.67
 6 11 -2 31.11 1.67
 6 -12 -2 29.39 1.17
 6 12 2 33.5 1.93
 -6 -12 2 33.84 1.87
 -6 12 -2 34.31 1.78
 -6 -12 2 31.45 1.73
 6 12 2 31.14 1.78
 6 12 2 32.98 1.81
 -6 12 -2 31.39 1.74
 -6 -12 2 30.51 1.85
 6 -12 -2 32.14 1.77
 -6 12 -2 27.71 2.01
 6 -12 -2 28.63 1.72
 -6 -12 -2 29.92 1.89
 -6 12 2 32.02 1.75
 -6 12 2 28.63 1.65
 -6 -12 -2 32.04 1.8
 6 12 -2 29.78 1.79
 6 12 -2 30.48 1.85
 -6 -12 -2 30.48 1.86
 -6 12 2 30.34 1.81
 -6 -12 -2 34.3 1.8
 6 -12 2 29.13 1.71
 6 12 -2 31.94 1.78
 6 -12 2 32.48 1.8
 -6 -13 2 29.16 2.09
 -6 -13 2 33.3 1.94
 -6 13 -2 32.94 1.91
 6 13 2 32.23 1.91
 6 13 2 32.83 2.01
 6 -13 -2 28.6 1.83
 6 -13 -2 28.84 1.9
 -6 13 -2 31.58 1.9
 -6 13 -2 30.08 1.73
 -6 -13 2 34.11 2.4
 -6 -13 -2 29.16 2.26
 6 -13 2 34.31 1.88
 -6 13 2 27.79 1.89
 -6 -13 -2 27.13 1.86
 -6 13 2 28.75 1.73
 6 13 -2 30.31 2
 -6 -13 -2 28.88 1.86
 6 -13 2 32.02 1.88
 6 13 -2 29.64 1.98
 -6 13 2 27.68 1.84
 -6 -13 -2 32.9 1.97
 6 13 -2 30.08 1.91
 -6 -14 2 3.98 1.22
 -6 -14 2 1.21 0.84
 -6 14 -2 1.73 1.09
 6 -14 -2 0.1 1
 -6 14 -2 1.07 1
 -6 14 -2 2.13 1.14
 6 14 2 3.78 1.11
 6 14 2 3.53 1.19
 6 14 2 2.73 1.1
 6 -14 -2 1.69 1.1
 -6 14 2 -0.37 1.12
 6 -14 2 3.45 1.02
 6 14 -2 2.61 1.1
 -6 -14 -2 0.18 1.11
 -6 -14 -2 1.18 1.07
 -6 14 2 1.4 0.93
 -6 -14 -2 1.97 0.89
 -6 14 2 1.48 1.04
 6 -14 2 0.1 1.07
 6 14 -2 1.87 1.13
 6 14 -2 1.65 1.12
 -6 -14 -2 3 1.17
 6 15 2 5.13 1.17
 -6 -15 2 3.73 0.94
 6 -15 -2 1.39 1.19
 -6 15 -2 3.56 1.22
 -6 15 -2 2.54 1.81
 -6 -15 2 4.43 1.21
 6 15 2 3.46 1.2
 6 15 2 2.86 1.3
 -6 -15 -2 4.59 1.29
 -6 -15 -2 5.4 1.19
 -6 15 2 1.65 1.11
 -6 -15 -2 2.19 1.25
 -6 15 2 4.41 1.19
 6 -15 2 3.82 1.22
 6 15 -2 5.48 1.27
 6 -15 2 6.48 1.3
 6 15 -2 1.94 1.24
 -6 -16 2 3.04 1.26
 6 16 2 2.48 1.45
 6 -16 -2 2.41 1.44
 -6 16 -2 3.05 1.28
 6 16 2 2.73 1.31
 6 -16 -2 2.89 1.33
 -6 16 -2 0.72 1.18
 6 16 -2 2.83 1.34
 -6 -16 -2 3.04 1.28
 -6 16 2 2.12 1.25
 6 -16 2 3.6 1.26
 -6 -16 -2 3.09 1.46
 -6 16 2 1.65 1.09
 6 16 -2 2.24 1.33
 6 -16 2 5.51 1.31
 6 16 -2 0.09 1.39
 -7 0 2 6.82 0.51
 -7 0 2 7.76 0.45
 -7 0 -2 7.8 0.62
 -7 0 2 8.73 0.73
 -7 0 -2 7.63 0.48
 7 0 -2 7.38 0.52
 7 0 -2 6.54 0.5
 -7 -1 2 28.7 0.92
 7 -1 -2 27.7 1.07
 -7 -1 2 26.91 0.89
 -7 1 -2 29.38 0.95
 7 1 2 30.73 1.03
 -7 -1 2 28.87 1.13
 7 -1 -2 29.25 0.87
 7 1 -2 27.23 1.16
 -7 1 2 28.23 0.84
 7 1 -2 30.15 0.91
 -7 1 2 29.26 1.02
 -7 -1 -2 27.75 1
 7 1 -2 29.34 0.91
 -7 1 2 30.55 0.86
 7 -2 -2 27.13 1
 7 2 2 27.69 0.89
 7 2 2 26.59 1.01
 7 -2 -2 26.56 0.88
 -7 -2 2 28.24 1.15
 -7 -2 2 27.63 0.94
 -7 -2 2 25.16 0.94
 -7 2 -2 25.31 0.93
 7 2 -2 27.77 0.94
 7 2 -2 26.98 0.94
 7 2 -2 26.92 0.93
 -7 2 2 27.55 0.88
 -7 -2 -2 26.81 0.88
 -7 -2 -2 27.22 0.89
 -7 -2 -2 28.84 1.02
 -7 2 2 27.48 0.96
 -7 2 2 26.51 0.86
 7 3 2 62.88 1.79
 -7 -3 2 61.84 1.76
 -7 -3 2 61.87 1.75
 7 3 2 63.14 1.72
 -7 3 -2 58.7 1.65
 7 3 2 64.72 1.72
 -7 -3 2 64.26 1.9
 7 -3 -2 62.17 1.69
 7 -3 -2 64.53 1.7
 7 -3 -2 64.88 1.73
 -7 -3 2 63.97 1.75
 -7 3 2 64 1.7
 -7 -3 -2 60.6 1.72
 7 3 -2 62.29 1.76
 -7 -3 -2 61.93 1.79
 -7 3 2 61.35 1.69
 7 -3 2 61.89 1.64
 -7 -3 -2 61.66 1.72
 7 3 -2 63.49 1.75
 -7 3 2 63.11 1.69
 7 3 -2 64.43 1.74
 -7 4 -2 3.36 0.42
 7 4 2 3.5 0.51
 -7 4 -2 2.54 0.43
 7 -4 -2 2.84 0.47
 -7 -4 2 3.6 0.54
 -7 -4 2 3.29 0.54
 7 -4 -2 2.9 0.35
 7 4 2 3.04 0.51
 7 -4 -2 3.87 0.45
 7 4 2 4.33 0.52
 -7 -4 2 3.21 0.52
 -7 -4 -2 3.73 0.53
 -7 4 2 3.14 0.48
 -7 4 2 3.65 0.32
 -7 4 2 3.55 0.46
 7 4 -2 3.37 0.5
 7 4 -2 3.41 0.48
 7 -4 2 3.25 0.45
 -7 -4 -2 2.53 0.5
 -7 -4 -2 2.28 0.49
 7 5 2 1.98 0.54
 -7 5 -2 2.07 0.48
 7 5 2 1.86 0.53
 7 -5 -2 1.94 0.49
 7 5 2 2.3 0.54
 7 -5 -2 1.49 0.32
 -7 -5 2 2.42 0.55
 7 -5 -2 3.09 0.49
 -7 -5 2 2.19 0.5
 -7 -5 2 1.52 0.55
 -7 -5 2 1.68 0.54
 -7 5 -2 1.88 0.47
 -7 -5 -2 1.35 0.54
 7 5 -2 1.98 0.56
 -7 5 2 2.21 0.42
 7 5 -2 2.2 0.51
 -7 -5 -2 2.62 0.55
 -7 5 2 2.01 0.52
 7 5 -2 1.98 0.51
 -7 5 2 2.94 0.5
 7 -5 2 2.42 0.49
 7 -5 2 2.38 0.48
 -7 -5 -2 1.66 0.55
 -7 -6 2 7.23 0.65
 -7 6 -2 6.69 0.59
 7 6 2 6.07 0.65
 7 6 2 5.68 0.63
 7 -6 -2 6.61 0.57
 -7 -6 2 5.93 0.68
 7 -6 -2 5.87 0.6
 -7 -6 2 4.67 0.6
 7 6 2 5.57 0.68
 -7 6 -2 5.82 0.59
 -7 -6 2 4.71 0.62
 7 -6 -2 7 0.6
 7 6 -2 6.51 0.7
 7 -6 2 4.94 0.58
 7 6 -2 5.6 0.69
 7 6 -2 5.47 0.63
 -7 -6 -2 4.64 0.63
 -7 -6 -2 6.09 0.68
 -7 6 2 5.78 0.51
 -7 6 2 5.84 0.6
 -7 6 2 6.21 0.61
 7 -6 2 6.07 0.6
 -7 -6 -2 5.88 0.63
 7 -7 -2 23.2 1.14
 7 -7 -2 22.28 1.12
 -7 -7 2 23.83 1.2
 7 7 2 23.58 1.22
 -7 7 -2 22.51 1.13
 7 -7 -2 23.33 0.82
 -7 -7 2 21.99 1.27
 7 7 2 23.31 1.22
 -7 -7 2 22.45 1.22
 -7 -7 2 22.9 1.2
 -7 7 -2 22.34 1.13
 7 7 2 22.21 1.22
 -7 7 2 21.76 1.05
 -7 -7 -2 22.75 1.21
 7 7 -2 23.83 1.19
 -7 -7 -2 24.34 1.23
 7 7 -2 22.45 1.26
 -7 -7 -2 22.49 1.21
 7 -7 2 23.08 1.11
 7 7 -2 22.16 1.17
 -7 7 2 23.05 1.12
 7 -7 2 24.89 1.15
 -7 7 2 22.35 1.16
 -7 8 -2 8.1 0.75
 7 -8 -2 8.92 0.72
 7 8 2 10.05 0.81
 7 -8 -2 8.94 0.74
 7 8 2 8.28 0.8
 7 8 2 8.34 0.77
 -7 -8 2 7.64 0.69
 -7 -8 2 7.39 0.74
 -7 -8 -2 9.05 0.78
 7 8 -2 10.1 0.85
 -7 -8 -2 7.79 0.79
 7 8 -2 8.23 0.74
 7 8 -2 8.32 0.77
 -7 8 2 7.63 0.66
 -7 8 2 8.55 0.77
 -7 8 2 8.75 0.78
 -7 -8 -2 9.16 0.8
 -7 -9 2 3.78 0.67
 -7 -9 2 3.21 0.76
 -7 -9 2 4.66 0.8
 -7 9 -2 3.83 0.76
 7 -9 -2 3.39 0.74
 -7 -9 2 2.73 0.75
 7 9 2 3.35 0.87
 7 -9 -2 4.91 0.8
 7 9 2 4.69 0.76
 -7 9 -2 4.29 0.69
 7 9 2 2.81 0.73
 7 9 -2 4.75 0.88
 -7 -9 -2 4.31 0.75
 7 9 -2 3.18 0.75
 -7 -9 -2 3.42 0.8
 7 -9 2 2.48 0.73
 -7 9 2 4.09 0.77
 -7 9 2 4.2 0.67
 -7 9 2 4.49 0.79
 7 9 -2 3.12 0.74
 7 -9 2 2.38 0.71
 -7 10 -2 5.19 0.86
 -7 10 -2 3.47 0.75
 -7 -10 2 4.07 0.83
 -7 -10 2 3.39 0.81
 7 10 2 4.3 0.91
 -7 10 -2 3.32 0.79
 7 10 2 4.75 0.87
 7 -10 -2 2.68 0.84
 7 10 2 4.07 0.87
 -7 -10 2 4.54 0.84
 -7 -10 2 2.2 0.72
 -7 10 2 3.97 0.75
 7 -10 2 3.99 0.88
 -7 10 2 3.72 0.87
 -7 10 2 2.34 0.83
 7 10 -2 2.46 0.89
 -7 -10 -2 2.68 0.82
 7 10 -2 4.1 0.84
 7 10 -2 3.66 0.8
 -7 -10 -2 3.26 0.94
 7 -11 -2 9.37 1.05
 -7 11 -2 8.59 0.92
 7 11 2 10.27 1.11
 -7 11 -2 9.21 0.94
 7 11 2 11.31 1.06
 -7 -11 2 7.21 1.54
 -7 -11 2 7.3 0.85
 -7 -11 2 9.66 1.06
 7 11 2 10.11 1
 -7 11 2 8.06 1.16
 7 11 -2 8.99 0.99
 -7 -11 -2 9.63 1.02
 7 -11 2 8.2 1
 -7 11 2 10.17 0.97
 7 -11 2 10.5 0.95
 7 11 -2 10.84 1.11
 -7 -11 -2 10.35 1.06
 -7 -12 2 3.59 1.06
 -7 -12 2 3.12 0.92
 7 -12 -2 2.85 0.91
 -7 12 -2 3.77 0.94
 7 -12 -2 1.49 0.99
 -7 12 -2 3.97 0.96
 -7 -12 2 3.58 1.35
 -7 -12 2 2.48 1.06
 7 12 2 3.31 0.97
 -7 12 -2 2.02 1.52
 7 12 2 5.34 1
 7 12 2 3.48 1.06
 -7 12 2 3.34 0.82
 -7 -12 -2 4.7 1.05
 7 12 -2 2.82 0.87
 -7 12 2 2.2 0.99
 7 -12 2 3.19 1.01
 -7 12 2 3.4 0.96
 -7 -12 -2 1.36 1.05
 7 12 -2 3.56 1.03
 -7 -12 -2 3.13 0.96
 7 -12 2 4.97 1.04
 7 12 -2 4.52 1.12
 7 -13 -2 4.94 1.2
 -7 13 -2 6.29 1.02
 -7 -13 2 5.27 1.13
 -7 13 -2 7.49 1.12
 7 13 2 8.74 1.21
 7 13 2 7.92 1.11
 7 13 2 8 1.13
 -7 -13 2 7.17 0.94
 7 -13 -2 6.89 1.12
 -7 13 2 6.84 0.96
 -7 -13 -2 5.45 0.94
 7 13 -2 5.96 1.16
 7 13 -2 5.85 1.05
 -7 -13 -2 6.84 1.07
 -7 -13 -2 7.03 1.12
 -7 13 2 5.89 1.1
 7 13 -2 6.34 1.15
 7 -13 2 7.2 1.06
 -7 13 2 6.59 1.21
 -7 -14 2 -1.19 1
 7 -14 -2 -0.06 1.08
 7 14 2 -0.77 1.01
 -7 -14 2 -0.62 1.12
 -7 14 -2 0.67 1.14
 -7 -14 2 0.99 0.82
 7 14 2 -0.92 1.2
 7 -14 -2 -0.23 1.07
 -7 14 -2 0.8 1.09
 -7 14 -2 -0.41 0.98
 7 14 2 1.04 1.11
 7 14 -2 2.49 1.2
 7 14 -2 1.45 1.03
 -7 -14 -2 2.3 1.21
 -7 -14 -2 0.57 0.9
 7 -14 2 0.82 1.13
 -7 14 2 -1.1 0.93
 -7 -14 -2 0.74 1.13
 7 -14 2 1.13 1.07
 -7 14 2 -0.41 1.14
 7 14 -2 -1.15 0.97
 -7 -14 -2 -1.63 1.05
 -7 14 2 -0.26 1.15
 7 15 2 1.19 1.09
 -7 15 -2 -0.73 1.18
 -7 -15 2 -1.2 1.19
 -7 -15 2 1.34 0.94
 7 -15 -2 -0.29 1.21
 -7 15 -2 -1.35 1.05
 -7 15 -2 -1.07 1.07
 -7 -15 2 1.53 1.14
 7 15 2 2.8 1.19
 7 -15 2 0.97 1.02
 7 -15 2 1.92 1.16
 -7 15 2 1.05 1.21
 -7 -15 -2 0.07 0.99
 7 15 -2 -0.01 1.27
 7 15 -2 0.05 1.13
 7 15 -2 2.12 1.23
 -7 15 2 0.52 0.99
 -7 -15 -2 0.42 1.07
 -7 -15 -2 2.05 1.26
 -7 -16 2 4.22 1.45
 7 16 2 0.72 1.39
 7 -16 -2 3.44 1.36
 7 16 2 2.71 1.3
 -7 -16 2 -0.79 1.3
 7 16 2 2.4 1.28
 -7 16 -2 -0.02 1.28
 -7 16 -2 2.74 1.26
 -7 16 -2 1.71 1.13
 7 -16 -2 1.21 1.32
 -7 16 2 0.35 1.39
 7 -16 2 0.42 1.17
 -7 -16 -2 0.91 1.25
 -7 16 2 -0.57 1.28
 7 -16 2 1.36 1.38
 7 16 -2 1.73 1.32
 -7 -16 -2 -0.17 0.99
 7 16 -2 1.5 1.44
 -7 -16 -2 1.85 1.33
 -7 16 2 2.79 1.07
 8 0 -2 202.48 4.93
 8 0 -2 189.54 4.77
 -8 0 -2 194.97 4.89
 -8 0 2 194.99 4.78
 -8 0 2 200.19 4.91
 -8 0 -2 196.1 4.85
 -8 0 2 191.75 4.79
 8 -1 -2 27.58 0.85
 -8 1 -2 28.45 1.03
 8 1 2 28.28 1.02
 -8 -1 2 27.96 0.89
 8 -1 -2 27.73 1.14
 -8 1 -2 28.43 0.95
 -8 -1 2 27.85 0.92
 -8 -1 2 28.35 0.9
 -8 -1 2 29.63 1.16
 8 1 -2 27.68 0.91
 -8 1 2 28.96 1.06
 -8 -1 -2 29.04 1.02
 -8 1 2 27.38 0.85
 -8 1 2 27.26 0.85
 -8 -1 -2 27.13 1.16
 8 1 -2 27.53 0.89
 8 2 2 6.44 0.41
 -8 -2 2 6.08 0.47
 8 2 2 5.84 0.49
 8 -2 -2 5.55 0.47
 -8 -2 2 5.82 0.45
 -8 -2 2 4.82 0.57
 8 2 -2 6.64 0.46
 8 2 -2 6.63 0.46
 -8 2 2 5.17 0.43
 -8 -2 -2 5.88 0.4
 -8 2 2 7.05 0.53
 -8 -2 -2 6.54 0.52
 8 2 -2 5.82 0.47
 -8 2 2 5.34 0.46
 -8 -3 2 44.01 1.35
 -8 -3 2 45.6 1.56
 8 3 2 44.94 1.31
 -8 3 -2 45.66 1.3
 8 -3 -2 44.89 1.36
 -8 -3 2 44.6 1.37
 8 3 2 46.31 1.33
 8 -3 -2 46.02 1.3
 8 3 2 45.03 1.44
 -8 -3 -2 45.48 1.32
 8 3 -2 43.88 1.35
 -8 -3 -2 44.56 1.33
 -8 3 2 44.36 1.33
 -8 3 2 43.18 1.28
 8 3 -2 43.9 1.39
 -8 3 2 44.33 1.3
 8 3 -2 46.68 1.38
 -8 -3 -2 47.64 1.45
 8 4 2 102.72 2.76
 -8 4 -2 102.25 2.62
 8 -4 -2 102.42 2.65
 -8 -4 2 100.9 2.71
 -8 -4 2 105.6 2.74
 8 -4 -2 101.39 2.64
 -8 -4 2 106.8 2.85
 8 -4 -2 101.47 2.65
 8 4 2 101.62 2.69
 -8 -4 2 105.42 2.71
 8 4 2 104.31 2.69
 -8 4 2 99.01 2.64
 -8 -4 -2 100.95 2.68
 -8 4 2 96.78 2.62
 8 4 -2 105.59 2.71
 -8 -4 -2 104.17 2.76
 8 -4 2 103.63 2.61
 8 4 -2 104.09 2.72
 -8 4 2 103.22 2.65
 -8 -4 -2 103.31 2.68
 -8 -5 2 3.02 0.56
 8 5 2 3.08 0.56
 -8 -5 2 1.72 0.55
 8 5 2 3.15 0.56
 -8 -5 2 3.34 0.56
 -8 5 -2 3.83 0.5
 8 -5 -2 3.15 0.49
 -8 5 -2 2.9 0.47
 8 5 2 3.22 0.57
 -8 -5 2 3.05 0.58
 8 -5 -2 2.3 0.5
 8 -5 2 3.48 0.5
 8 5 -2 3.58 0.57
 -8 -5 -2 2.9 0.58
 8 -5 2 3.48 0.47
 -8 5 2 2.69 0.5
 8 5 -2 2.48 0.59
 -8 5 2 2.55 0.5
 8 5 -2 2.59 0.53
 -8 -5 -2 2.07 0.54
 -8 -5 -2 2.55 0.57
 8 -6 -2 71.18 2.03
 8 -6 -2 69.65 1.88
 -8 -6 2 69.92 2.09
 8 -6 -2 68.93 2
 -8 -6 2 74.56 2.09
 -8 -6 2 72.24 2.13
 8 6 2 68.69 2.09
 -8 -6 2 72.78 2.2
 -8 6 -2 71.94 2
 -8 6 -2 72.49 1.99
 8 6 2 73.09 2.08
 8 6 2 71.34 2.12
 -8 -6 -2 69.62 2.08
 8 6 -2 70.85 2.12
 8 -6 2 71.88 2
 8 -6 2 72.83 2.01
 8 6 -2 71.95 2.08
 -8 -6 -2 67.25 2.07
 8 6 -2 72.25 2.11
 -8 6 2 71.54 2.02
 -8 6 2 72.74 2.02
 -8 -6 -2 71.02 2.15
 -8 6 2 70.81 1.98
 -8 -7 2 1.23 0.62
 8 -7 -2 1.32 0.31
 8 -7 -2 1.96 0.6
 8 -7 -2 1.21 0.6
 -8 7 -2 2.33 0.59
 8 7 2 2.18 0.61
 -8 -7 2 0.95 0.62
 -8 -7 2 1.47 0.59
 -8 -7 2 1.8 0.63
 8 7 2 2.54 0.67
 8 7 2 2.64 0.7
 8 -7 2 2.52 0.59
 8 7 -2 1.96 0.6
 8 7 -2 1.81 0.62
 -8 7 2 1.91 0.59
 8 -7 2 1.83 0.57
 -8 -7 -2 2.5 0.64
 -8 7 2 1.47 0.51
 8 7 -2 2.12 0.66
 -8 -7 -2 2.52 0.64
 -8 -7 -2 1.75 0.64
 -8 7 2 1.2 0.57
 -8 -8 2 9.25 0.86
 8 8 2 10.4 0.87
 -8 8 -2 9.73 0.76
 8 8 2 8.58 0.83
 -8 8 -2 8.4 0.76
 -8 -8 2 9.61 0.82
 8 -8 -2 10.23 0.75
 8 -8 2 9.7 0.78
 -8 8 2 9.22 0.7
 8 -8 2 9.62 0.75
 8 8 -2 8.41 0.78
 8 8 -2 9.9 0.88
 -8 8 2 9.54 0.82
 -8 -8 -2 8.1 0.8
 8 8 -2 9.2 0.82
 -8 8 2 9.28 0.76
 -8 -8 -2 8.65 0.8
 -8 -8 -2 8.17 0.81
 8 9 2 15.4 1.06
 -8 9 -2 14.08 1.2
 -8 -9 2 14.56 1
 8 -9 -2 13.75 1.21
 -8 -9 2 14.59 1.3
 -8 9 -2 15.28 1.23
 8 -9 -2 12.53 0.9
 8 9 2 14.23 1.04
 -8 -9 2 15.27 1
 -8 9 -2 14.06 1.22
 8 -9 2 14.82 0.97
 -8 9 2 13.75 1.14
 8 9 -2 12.33 0.93
 -8 -9 -2 12.95 1.03
 8 -9 2 15.39 0.99
 -8 -9 -2 12.57 0.97
 -8 9 2 12.9 0.96
 -8 9 2 13.54 0.94
 -8 -9 -2 14.6 1.09
 8 9 -2 15.44 1.32
 8 9 -2 13.45 0.96
 8 -10 -2 0.47 0.81
 -8 -10 2 1.86 0.74
 -8 10 -2 0.43 0.76
 8 10 2 0.4 0.89
 -8 10 -2 1.8 0.73
 8 10 2 1.01 0.99
 -8 -10 2 0.84 0.82
 -8 -10 2 1.43 0.81
 8 10 2 1.58 0.92
 -8 10 -2 1.88 0.84
 8 -10 2 0.67 0.78
 -8 -10 -2 1.11 0.75
 -8 -10 -2 0.8 0.92
 8 10 -2 1.49 0.82
 -8 -10 -2 1.08 0.84
 -8 10 2 1.58 0.84
 -8 10 2 1.71 0.81
 8 10 -2 1.29 0.81
 8 10 -2 1.47 0.92
 -8 10 2 1.41 0.68
 8 -10 2 0.68 0.77
 -8 -11 2 1.71 0.85
 -8 11 -2 2.86 0.93
 8 11 2 0.3 0.86
 -8 -11 2 0.25 0.86
 8 11 2 0.96 0.97
 -8 -11 2 0.23 1.26
 -8 -11 2 -0.31 0.89
 8 -11 -2 0.83 0.9
 8 11 2 2.13 0.89
 -8 11 -2 0.93 0.85
 8 -11 2 1.6 0.87
 8 11 -2 1.03 0.95
 8 11 -2 0.9 0.89
 -8 -11 -2 -0.2 0.84
 8 11 -2 1.01 0.9
 -8 11 2 2.12 0.76
 -8 -11 -2 -0.51 0.88
 -8 -11 -2 2.31 1.01
 -8 -11 -2 0.05 0.85
 -8 11 2 1.03 0.84
 -8 11 2 1.79 0.93
 -8 -12 2 12.8 1.19
 8 12 2 15.57 1.32
 -8 -12 2 13.67 1.17
 8 12 2 14.31 1.2
 8 -12 -2 13.52 1.22
 8 -12 -2 11.59 1.15
 -8 12 -2 10.88 1.27
 -8 12 -2 14.93 1.12
 -8 12 2 13.79 1.04
 -8 -12 -2 13.56 1.19
 8 -12 2 14.19 1.17
 -8 12 2 14.1 1.1
 8 12 -2 13.37 1.34
 8 12 -2 13.02 1.13
 -8 -12 -2 14.97 1.2
 8 -12 2 13.14 1.14
 8 12 -2 12.06 1.18
 -8 -12 -2 15.33 1.21
 -8 12 2 13.01 1.12
 -8 -13 2 -0.59 1.34
 -8 13 -2 0.54 0.91
 -8 13 -2 1.84 0.99
 -8 -13 2 0.21 1
 8 13 2 0.86 1.03
 8 13 2 1.47 0.99
 -8 13 -2 1.33 1.02
 8 13 2 -0.36 1.08
 8 -13 -2 1.32 1.05
 -8 -13 2 1.83 0.87
 8 -13 -2 1.13 0.97
 -8 -13 -2 1.23 0.94
 8 13 -2 0.06 1.02
 -8 -13 -2 -0.43 1.11
 -8 13 2 -0.3 1.04
 8 13 -2 2.51 1.03
 -8 -13 -2 -0.07 1.09
 8 13 -2 0.29 1.07
 -8 13 2 2.29 1.1
 -8 -13 -2 1.45 0.84
 8 -13 2 0.54 1.02
 -8 13 2 0.61 0.86
 -8 14 -2 3.48 1.06
 8 -14 -2 3.04 1.09
 -8 -14 2 4.24 1.14
 8 -14 -2 1.96 1.17
 -8 -14 2 2.58 0.94
 8 14 2 4.85 1.14
 -8 14 -2 3.37 1.13
 8 14 2 2.56 1.5
 -8 -14 2 3.56 1.17
 8 -14 2 3.06 1.12
 -8 -14 -2 3.56 1.13
 -8 -14 -2 3.38 1.11
 8 14 -2 5.17 1.13
 8 14 -2 5.48 1.16
 -8 -14 -2 2.13 0.98
 -8 14 2 2.25 1.19
 8 14 -2 4.43 1.25
 -8 14 2 3.27 1.03
 8 -15 -2 -0.24 1.17
 8 -15 -2 0.86 1.19
 -8 -15 2 1.04 1.22
 8 15 2 3.1 1.1
 8 15 2 0.61 1.32
 -8 15 -2 1.41 1.07
 -8 15 -2 2.27 1.15
 -8 -15 2 1.45 1
 8 15 2 1.5 1.28
 -8 -15 2 -0.5 1.27
 8 15 -2 -1.02 1.23
 -8 15 2 0.98 1.19
 -8 -15 -2 0.85 1.18
 -8 15 2 -0.53 0.99
 -8 15 2 1.49 1.32
 -8 -15 -2 -0.79 1.13
 8 15 -2 0.32 1.14
 8 -15 2 0.01 1.16
 -8 -15 -2 1.82 1.37
 -8 -15 -2 -0.67 0.99
 -8 16 -2 0.96 1.17
 8 16 2 2.08 1.43
 8 -16 -2 3.13 1.35
 8 16 2 3.61 1.46
 -8 16 -2 1.96 1.25
 -8 -16 2 0.85 1.26
 -8 16 -2 0.34 1.26
 -8 16 2 1.34 1.44
 -8 -16 -2 0.98 1.37
 8 -16 2 0.94 1.26
 -8 16 2 3.42 1.39
 8 16 -2 1.06 1.5
 8 16 -2 2.51 1.36
 -8 -16 -2 2.89 1.11
 -8 -16 -2 -1.61 1.36
 8 -16 2 -2.48 2.09
 -9 0 -2 0.95 0.38
 -9 0 2 1.1 0.31
 9 0 -2 0.5 0.46
 -9 0 2 0.7 0.31
 -9 0 -2 1.36 0.38
 -9 1 -2 26.56 0.94
 -9 1 -2 26.39 1.02
 -9 -1 2 26.47 0.9
 9 -1 -2 26.38 1.12
 -9 -1 2 26.62 0.89
 -9 -1 -2 28.8 1.15
 9 1 -2 28.71 1.24
 -9 1 2 27.5 1.06
 -9 1 2 25.94 0.85
 -9 -1 -2 27.42 1.02
 9 1 -2 25.53 0.91
 9 -2 -2 8.34 0.58
 9 2 2 9.2 0.54
 -9 2 -2 8.83 0.73
 -9 -2 2 9.32 0.69
 9 2 2 8.44 0.57
 -9 -2 2 8.96 0.63
 -9 -2 2 8.32 0.63
 -9 2 2 9.11 0.52
 -9 -2 -2 9.43 0.77
 -9 2 2 8.91 0.76
 -9 -2 -2 8.83 0.62
 9 2 -2 8.22 0.63
 -9 -2 -2 9.31 0.55
 9 2 -2 8.16 0.68
 -9 2 2 8.56 0.54
 -9 -3 2 34.26 1.17
 -9 3 -2 35.65 1.12
 9 -3 -2 35.31 1.2
 -9 -3 2 36.5 1.14
 9 3 2 34.55 1.23
 -9 -3 2 35.64 1.4
 9 -3 -2 34.46 1.08
 -9 -3 2 35.89 1.19
 9 3 2 33.77 1.1
 -9 3 2 34.98 1.11
 9 3 -2 33.9 1.14
 -9 -3 -2 34.95 1.09
 -9 3 2 33.88 1.05
 -9 -3 -2 36.23 1.26
 -9 -3 -2 33.39 1.11
 -9 -3 -2 33.95 1.4
 9 3 -2 35.58 1.18
 -9 -4 2 3.41 0.54
 9 -4 -2 4.16 0.45
 9 4 2 4.06 0.52
 -9 4 -2 3.01 0.32
 9 -4 -2 2.72 0.39
 -9 4 -2 3.49 0.41
 9 4 2 4.23 0.5
 9 4 2 2.9 0.53
 -9 4 -2 2.85 0.39
 -9 -4 2 3.38 0.53
 -9 -4 2 3.99 0.59
 9 4 -2 3.62 0.5
 -9 4 2 2.56 0.36
 -9 -4 -2 3.25 0.49
 9 -4 2 2.64 0.31
 -9 -4 -2 2.23 0.55
 -9 -4 -2 2.61 0.52
 9 -4 2 3.53 0.39
 9 4 -2 3.4 0.51
 9 5 2 12.39 0.87
 9 5 2 12.11 0.92
 9 -5 -2 11.58 0.82
 9 -5 -2 11.91 0.78
 -9 5 -2 12.47 0.75
 -9 -5 2 12.02 0.93
 -9 -5 2 12.5 0.92
 -9 5 -2 11.37 0.76
 9 5 2 11.96 0.95
 -9 5 2 11.22 0.78
 -9 5 2 11.89 0.66
 -9 -5 -2 10 0.89
 9 -5 2 11.99 0.77
 -9 -5 -2 11.35 0.89
 9 5 -2 11.28 0.9
 -9 5 2 11.4 0.81
 9 5 -2 12.04 0.93
 9 6 2 14.64 0.99
 9 -6 -2 14.14 0.94
 -9 6 -2 14.38 0.88
 9 6 2 13.13 1.05
 9 -6 -2 13.12 0.73
 -9 -6 2 14.2 1.02
 9 -6 -2 12.53 0.88
 -9 6 -2 12.61 0.85
 -9 -6 2 15.17 1.21
 9 6 2 12.39 1.03
 -9 -6 2 12.9 1.07
 -9 -6 2 13.66 1.03
 -9 6 2 12.53 0.89
 -9 -6 -2 12 1.07
 9 -6 2 15.06 0.9
 9 6 -2 14.08 1.05
 -9 -6 -2 12.77 1
 9 6 -2 14.62 1.04
 -9 6 2 13.88 0.92
 9 6 -2 13.8 1.03
 -9 -6 -2 14 1.01
 -9 6 2 11.99 0.84
 -9 -6 -2 12.66 0.84
 -9 7 -2 22.37 1.11
 9 7 2 24.02 1.3
 9 -7 -2 23.22 1.12
 -9 -7 2 23.98 1.31
 -9 7 -2 21.75 1.09
 9 7 2 22.7 1.22
 -9 -7 2 24.14 1.38
 9 -7 -2 22.61 1.14
 -9 -7 2 23.73 1.25
 9 7 2 22.38 1.28
 -9 -7 2 22.49 1.22
 9 -7 -2 23.5 0.86
 9 7 -2 24.59 1.28
 -9 7 2 20.51 1.05
 9 -7 2 21.5 1.12
 -9 7 2 20.97 1.14
 -9 -7 -2 21.74 1.42
 9 -7 2 21.4 1.08
 9 7 -2 22.86 1.23
 -9 -7 -2 24.55 1.34
 9 7 -2 23.87 1.27
 -9 -7 -2 22.02 1.22
 -9 7 2 20.67 1.12
 -9 -7 -2 23.65 1.22
 9 8 2 1.62 0.7
 -9 -8 2 1.3 0.71
 -9 -8 2 1.75 0.67
 9 -8 -2 1.44 0.69
 -9 -8 2 0.36 0.7
 9 8 2 0.61 0.65
 9 8 2 1.91 0.73
 -9 8 -2 1.02 0.65
 9 -8 -2 1.81 0.66
 -9 -8 -2 2.46 0.75
 -9 8 2 1.36 0.66
 -9 8 2 2.27 0.67
 -9 8 2 1.43 0.57
 -9 -8 -2 2.17 0.79
 9 8 -2 1.79 0.68
 -9 -8 -2 0.99 0.74
 9 -8 2 2 0.64
 9 8 -2 0.81 0.72
 9 -8 2 0.47 0.65
 9 8 -2 0.47 0.69
 9 -9 -2 23.38 1.34
 9 -9 -2 23.37 1.34
 -9 -9 2 25.76 1.57
 -9 9 -2 24.37 1.34
 -9 -9 2 23.18 1.5
 9 9 2 24.3 1.51
 -9 9 -2 23.71 1.35
 -9 -9 2 25.02 1.49
 -9 -9 2 24.79 1.48
 9 9 2 24.09 1.43
 9 9 2 26.18 1.49
 9 9 -2 25.95 1.54
 -9 9 2 24.36 1.38
 9 9 -2 25.92 1.46
 -9 9 2 21.93 1.29
 9 9 -2 25.04 1.47
 -9 -9 -2 23.29 1.61
 9 -9 2 24.76 1.37
 -9 9 2 21.38 1.34
 9 -9 2 23.19 1.32
 -9 -9 -2 23.13 1.52
 -9 -9 -2 22.68 1.44
 -9 -9 -2 25.24 1.5
 9 10 2 1.22 0.8
 -9 10 -2 0.04 0.73
 9 10 2 0.77 0.84
 -9 10 -2 1.16 0.8
 -9 -10 2 1.2 0.86
 9 10 2 1.21 0.84
 -9 -10 2 0.25 0.89
 -9 10 -2 1.18 0.74
 -9 -10 2 -0.37 0.94
 -9 -10 2 0.8 0.81
 9 10 -2 0.93 0.84
 -9 10 2 1.95 0.87
 -9 -10 -2 2.33 1.53
 9 -10 2 0.19 1.17
 -9 -10 -2 0.46 1.11
 9 -10 2 0.85 0.76
 -9 -10 -2 1.52 1.12
 -9 10 2 0.89 0.69
 -9 -10 -2 1.31 0.84
 9 10 -2 0.9 0.9
 -9 10 2 1.81 0.86
 9 10 -2 -0.09 0.85
 -9 11 -2 2.23 0.83
 9 -11 -2 3.34 0.87
 -9 -11 2 1.11 0.92
 9 11 2 1.37 0.91
 9 11 2 2.54 1.03
 -9 11 -2 3.22 0.85
 -9 -11 2 2.34 0.83
 9 -11 -2 1.91 0.81
 -9 -11 2 2.24 0.92
 9 11 2 3.09 0.97
 -9 -11 2 3.31 1.05
 9 11 -2 3.42 0.96
 9 -11 2 3.48 0.85
 9 -11 2 4.31 0.87
 -9 -11 -2 2.32 0.92
 9 11 -2 2.14 0.94
 -9 -11 -2 1.89 0.76
 -9 11 2 2.08 0.85
 -9 -11 -2 4.49 1.04
 9 11 -2 1.73 0.92
 -9 11 2 2.89 0.76
 -9 -11 -2 3.24 0.93
 -9 11 2 3.07 0.92
 -9 12 -2 4.16 0.97
 9 12 2 4.36 1
 9 -12 -2 4.7 1.02
 9 12 2 2.71 0.99
 -9 12 -2 5.64 1
 -9 -12 2 3.05 0.89
 9 12 2 4.26 1.11
 -9 -12 2 4.36 1.02
 -9 12 -2 2.79 0.9
 9 -12 -2 4.19 0.98
 -9 -12 2 3.1 0.99
 -9 -12 2 3.43 1.05
 9 12 -2 1.96 1.01
 -9 12 2 6.04 1.11
 -9 12 2 2.18 0.97
 9 12 -2 3.47 1.11
 -9 -12 -2 5.92 1.04
 9 12 -2 4.56 1.09
 -9 -12 -2 4.31 0.91
 -9 -12 -2 5.5 1.12
 9 -12 2 4.97 1.03
 -9 -12 -2 2.68 0.95
 9 -12 2 3.83 0.99
 -9 12 2 3.3 0.84
 -9 13 -2 1.06 1
 -9 -13 2 2.1 0.88
 9 13 2 1.84 1.01
 9 -13 -2 -0.79 1.01
 9 -13 -2 0.49 0.98
 9 13 2 2.17 1.1
 9 13 2 2.5 1.09
 -9 13 -2 1.62 0.97
 -9 -13 2 0.41 1.1
 -9 -13 2 0.17 1.02
 -9 13 2 -0.11 1.05
 -9 -13 -2 2.47 1.05
 -9 13 2 0.24 1.02
 -9 -13 -2 -0.79 1.15
 9 13 -2 0.4 0.98
 9 13 -2 0.03 1.01
 9 13 -2 0.57 1.13
 9 -13 2 0.9 1
 -9 -13 -2 0.64 0.96
 -9 -14 2 -2.07 1.1
 9 -14 -2 -1 1.12
 9 -14 -2 2.24 1.15
 -9 -14 2 1.07 0.96
 9 14 2 0.11 1.08
 9 14 2 0.07 1.1
 9 14 -2 -0.61 1.1
 -9 -14 -2 -0.26 0.97
 9 14 -2 -0.62 1.12
 -9 14 2 -0.82 0.92
 9 14 -2 1.69 1.25
 -9 -14 -2 0.47 1.12
 -9 14 2 0.39 1.06
 9 -14 2 -1.87 1.16
 -9 14 2 1.08 1.14
 -9 -14 -2 -1.88 1.07
 9 -14 2 -1.35 0.96
 9 15 2 3.86 1.24
 -9 15 -2 0.14 1.14
 -9 15 -2 0.7 1.14
 -9 -15 2 2.55 1.22
 -9 -15 2 0.86 1
 9 15 2 3.14 1.43
 -9 -15 2 0.37 1.23
 9 15 2 1.65 1.11
 -9 15 -2 0.03 1.1
 -9 -15 -2 1.21 1
 -9 15 2 2.19 1.26
 9 -15 2 0.12 1.23
 9 15 -2 1.92 1.26
 9 -15 2 0.57 1.14
 -9 -15 -2 2.91 1.3
 -9 15 2 3.3 1.26
 -9 -15 -2 3.38 1.31
 -9 -15 -2 4.76 1.35
 9 15 -2 2.52 1.26
 10 0 -2 34.57 1.38
 -10 0 2 36.43 1.32
 -10 0 -2 34.78 1.15
 -10 0 -2 33.21 1.25
 -10 -1 2 28.66 1.26
 -10 1 -2 28.83 1.1
 -10 -1 2 28.39 0.95
 -10 -1 2 27.87 0.93
 -10 1 -2 28.44 1
 10 -1 -2 29.49 1.23
 -10 -1 -2 30.18 1.06
 -10 1 2 27.01 0.91
 10 1 -2 28.8 0.97
 10 1 -2 27.8 0.89
 -10 -1 -2 27.42 1.18
 -10 -2 2 15.32 1.1
 10 2 2 15.68 0.9
 -10 2 -2 16.14 0.87
 -10 -2 2 14.78 0.76
 -10 2 -2 16.16 0.77
 -10 -2 2 16.22 0.72
 10 -2 -2 14.59 0.98
 -10 2 2 14.68 0.66
 -10 2 2 15.12 0.89
 10 2 -2 16.81 0.72
 -10 -2 -2 16.97 0.9
 10 2 -2 15.65 0.79
 -10 2 2 15.15 0.65
 -10 -2 -2 14.55 0.63
 -10 3 -2 1.49 0.37
 -10 -3 2 2.04 0.48
 10 -3 -2 1.46 0.24
 10 3 2 1.8 0.4
 10 3 2 2.28 0.5
 -10 -3 2 0.59 0.53
 10 -3 -2 1.53 0.44
 -10 3 2 1.35 0.38
 -10 -3 -2 1.47 0.4
 10 3 -2 2.09 0.44
 10 3 -2 2.52 0.45
 -10 -3 -2 1.2 0.5
 -10 3 2 1.69 0.59
 10 -4 -2 14.98 0.76
 10 4 2 14.03 0.98
 10 4 2 13.19 0.84
 -10 4 -2 13.67 0.73
 10 4 -2 15.25 0.87
 10 4 -2 14.29 0.92
 10 4 -2 12.12 0.89
 -10 4 2 14.82 0.73
 -10 4 2 13.71 0.76
 10 5 2 12.12 0.88
 -10 -5 2 14.26 1.21
 10 5 2 13.63 0.92
 10 -5 -2 12.96 0.81
 -10 -5 2 11.62 0.93
 -10 -5 2 12.82 1.02
 -10 5 -2 11.22 0.75
 -10 -5 2 11.76 0.97
 10 5 2 12.65 1.01
 10 -5 -2 12.03 0.84
 10 -5 -2 12.72 0.77
 -10 -5 -2 12.33 0.89
 -10 -5 -2 12.31 0.91
 10 5 -2 12.84 0.92
 -10 -5 -2 13.89 1.07
 -10 -5 -2 11.09 0.8
 -10 5 2 11.87 0.7
 10 5 -2 13.61 0.98
 -10 5 2 12.13 0.8
 10 5 -2 11.31 0.98
 -10 5 2 13.59 0.82
 10 -5 2 10.88 0.74
 10 6 2 29.02 1.31
 10 6 2 24.51 1.19
 10 -6 -2 24.8 1.08
 -10 -6 2 27.24 1.46
 10 -6 -2 24.76 0.99
 -10 6 -2 26.58 1.07
 10 6 2 26.67 1.23
 10 -6 -2 25.35 1.12
 -10 -6 2 27.24 1.29
 -10 -6 2 28.65 1.23
 -10 -6 2 27.83 1.27
 -10 6 -2 26.85 1.05
 -10 -6 -2 24.96 1.21
 -10 -6 -2 26.76 1.48
 -10 -6 -2 25.89 1.2
 10 -6 2 26.05 1.17
 -10 6 2 26.03 1.1
 -10 6 2 26.47 1.09
 10 6 -2 24.42 1.21
 10 6 -2 25.33 1.26
 10 6 -2 27.72 1.25
 -10 6 2 27.54 0.94
 10 7 2 29.18 1.36
 -10 7 -2 26.6 1.17
 10 -7 -2 26.26 1.21
 -10 -7 2 29.97 1.54
 -10 -7 2 28.74 1.33
 -10 -7 2 26.36 1.33
 10 -7 -2 26.51 1.18
 10 7 2 28.04 1.41
 10 -7 -2 26.05 0.96
 -10 -7 2 27.06 1.4
 10 7 2 25.09 1.3
 -10 7 -2 26.64 1.17
 10 7 -2 28.21 1.34
 -10 -7 -2 25.92 1.55
 10 7 -2 26.63 1.37
 -10 -7 -2 27.51 1.3
 10 7 -2 28.66 1.36
 -10 7 2 26.03 1.23
 10 -7 2 28.38 1.2
 -10 7 2 26.17 1.13
 10 -7 2 25.55 1.13
 -10 8 -2 0.63 0.61
 10 8 2 1.05 0.71
 -10 -8 2 0.52 0.76
 -10 8 -2 -0.23 0.65
 -10 -8 2 -0.36 0.72
 10 -8 -2 0.82 0.66
 -10 -8 2 1.16 0.7
 10 8 2 1.14 0.71
 -10 -8 2 0.62 0.71
 10 8 2 -0.65 0.76
 -10 8 2 0.2 0.67
 10 8 -2 1.96 0.8
 10 -8 2 0.66 0.66
 -10 8 2 -0.73 0.64
 -10 -8 -2 0.41 0.67
 -10 8 2 0.75 0.59
 10 8 -2 0.09 0.68
 -10 -8 -2 -0.06 0.75
 10 8 -2 0.2 0.72
 10 -8 2 0.97 0.61
 -10 -8 -2 0.93 0.77
 -10 -8 -2 -0.29 0.69
 -10 -9 2 0.02 0.87
 10 9 2 -0.03 0.77
 -10 -9 2 1.48 0.81
 10 9 2 -1.23 1.32
 -10 -9 2 1.28 0.83
 10 -9 -2 1.26 0.7
 -10 9 -2 1.33 0.71
 10 9 2 0.88 0.85
 -10 -9 2 2.29 0.83
 -10 9 -2 1.55 0.76
 -10 -9 -2 1.12 1.23
 -10 -9 -2 1.5 0.83
 10 9 -2 1.72 0.85
 -10 -9 -2 0.21 0.82
 10 9 -2 0.29 0.79
 10 -9 2 1.66 0.73
 -10 9 2 0.6 0.64
 10 -9 2 0.19 0.71
 -10 -9 -2 1.81 0.8
 -10 9 2 0.23 0.73
 10 10 2 5.58 0.91
 -10 10 -2 4.27 0.92
 10 -10 -2 5.99 0.85
 -10 10 -2 5.12 0.79
 -10 10 -2 6.51 0.82
 -10 -10 2 5.95 1.56
 -10 -10 2 3.46 0.93
 -10 -10 2 4.9 0.9
 10 10 2 5.19 0.85
 -10 -10 2 4.99 0.87
 -10 10 2 4.77 0.86
 -10 -10 -2 5.08 0.99
 10 -10 2 4.91 0.84
 -10 10 2 6.71 0.78
 -10 -10 -2 6.08 0.97
 -10 -10 -2 4.08 0.83
 -10 -10 -2 4.82 0.99
 10 10 -2 5.33 0.96
 10 -10 2 5.44 0.9
 10 10 -2 3.35 0.9
 10 -11 -2 5.5 0.92
 10 11 2 4.18 1.08
 -10 11 -2 3.79 0.91
 -10 11 -2 3.25 0.81
 -10 -11 2 7.12 1.17
 -10 -11 2 5.77 1.01
 10 11 2 3.82 0.94
 -10 11 -2 4.99 0.91
 10 11 2 5.14 0.89
 -10 -11 2 4.94 0.89
 10 -11 -2 4.38 0.92
 -10 -11 2 4.35 0.97
 -10 11 2 3.61 0.8
 10 11 -2 2.73 1.01
 -10 -11 -2 3.23 0.85
 10 -11 2 5.23 0.92
 -10 -11 -2 6.75 1.02
 -10 11 2 6.52 0.97
 -10 11 2 3.84 0.89
 10 11 -2 5.18 0.96
 -10 -11 -2 5.07 1
 10 -11 2 5.94 0.91
 -10 -11 -2 6.08 1.04
 10 11 -2 5.14 1.12
 -10 12 -2 2.48 0.93
 -10 -12 2 2.08 1.07
 10 -12 -2 1.73 0.96
 10 -12 -2 2.86 0.96
 -10 12 -2 0.59 0.93
 -10 -12 2 0.63 1.01
 -10 -12 2 3.86 0.93
 10 12 2 3.25 1.11
 10 12 2 1.64 0.98
 10 12 2 2.11 1
 -10 12 -2 0.61 0.87
 -10 -12 2 0.34 1.02
 -10 -12 -2 1.39 1.11
 -10 -12 -2 1.92 1.08
 -10 -12 -2 0.3 0.95
 10 -12 2 4.14 0.94
 10 12 -2 3.21 1
 -10 12 2 2.75 1.02
 -10 -12 -2 2.05 0.97
 -10 12 2 2.84 0.87
 -10 12 2 2.66 0.95
 10 12 -2 1 1.03
 10 -13 -2 0.08 1.05
 -10 13 -2 1.11 0.98
 10 13 2 2.23 1.01
 -10 -13 2 -0.66 1.11
 10 13 2 0.67 1.05
 10 -13 -2 0.74 1.01
 -10 -13 2 0.16 1.05
 10 13 2 2.5 1.22
 -10 -13 2 1.93 1.04
 -10 -13 2 2.49 0.96
 -10 13 2 1.06 1
 -10 13 2 2.98 1.02
 10 13 -2 3.05 1.09
 -10 -13 -2 1.34 1.11
 10 13 -2 1.97 1.04
 -10 13 2 1.13 0.88
 -10 -13 -2 1.22 0.91
 -10 -13 -2 1.99 1.11
 10 13 -2 2.9 1.11
 10 -13 2 0.8 0.99
 -10 -14 2 -0.09 1.01
 -10 -14 2 0.95 1.18
 10 14 2 0.24 1.06
 10 -14 -2 0.22 1.13
 -10 -14 2 -1.47 1.09
 10 14 2 1.16 1.52
 10 -14 -2 2.48 1.12
 -10 14 -2 -0.12 1.06
 -10 14 -2 1.05 1.14
 10 14 -2 -1.64 1.25
 -10 14 2 2.46 0.97
 10 -14 2 1.54 1.07
 -10 14 2 0.68 1.13
 -10 -14 -2 0.32 0.88
 10 -14 2 0.75 1.1
 -10 -14 -2 2.27 1.28
 10 14 -2 -1.92 1.17
 10 14 -2 2.4 1.16
 -10 -14 -2 0.01 1.14
 10 -15 -2 0.1 1.12
 10 15 2 1 1.41
 -10 -15 2 -0.86 1.07
 10 15 2 0.13 1.23
 10 15 2 -1.16 1.28
 10 -15 2 -0.37 1.15
 -10 -15 -2 -0.65 1.23
 10 -15 2 1.3 1.22
 -10 15 2 -0.95 1
 10 15 -2 2.75 1.34
 -10 -15 -2 -0.27 1.04
 -10 15 2 0.31 1.23
 10 15 -2 -1.81 1.23
 -10 15 2 -1.5 1.27
 -10 -15 -2 0.61 1.19
 10 15 -2 -2.73 1.37
 -11 0 -2 93.5 2.49
 -11 0 -2 88.47 2.39
 -11 0 2 85.25 2.32
 -11 0 2 92.58 2.51
 11 -1 -2 13.34 1.04
 -11 -1 -2 13.26 0.85
 -11 -2 2 7.49 0.66
 11 2 2 9.96 0.84
 -11 2 -2 8.78 0.69
 -11 2 -2 7.48 0.54
 -11 -2 2 8.49 0.68
 11 -2 -2 8.31 0.63
 -11 -2 2 7.84 0.66
 -11 -2 -2 9.91 0.85
 -11 2 2 8.37 0.57
 11 2 -2 8.35 0.54
 -11 -2 -2 7.56 0.65
 11 2 -2 8.06 0.62
 -11 2 2 9.4 0.58
 -11 3 -2 18.82 0.91
 11 3 2 17.26 0.76
 -11 -3 2 18.24 1.19
 -11 -3 2 17.47 0.83
 11 -3 -2 19.7 1.03
 11 3 2 17.24 0.99
 -11 -3 2 17.87 0.88
 11 3 -2 15.63 0.92
 -11 3 2 16.94 0.72
 -11 -3 -2 17.56 0.79
 -11 3 2 15.97 0.92
 11 3 -2 17.79 0.9
 11 3 -2 17.69 0.84
 -11 -3 -2 17.43 1.19
 -11 -3 -2 17.67 1.03
 11 -4 -2 2.18 0.46
 -11 -4 2 2.46 0.53
 -11 -4 2 2.19 0.54
 11 4 2 2.66 0.56
 11 4 2 2.19 0.47
 -11 -4 2 1.87 0.63
 11 -4 -2 2.73 0.46
 -11 -4 2 2.2 0.5
 11 4 2 1.99 0.78
 -11 -4 -2 2.48 0.49
 -11 -4 -2 1.27 0.57
 -11 -4 -2 2.16 0.5
 -11 4 2 3.02 0.41
 11 4 -2 1.98 0.54
 11 4 -2 3.35 0.54
 -11 -4 -2 1.18 0.59
 11 4 -2 2.73 0.52
 -11 -5 2 1.67 0.6
 11 -5 -2 1.72 0.51
 -11 5 -2 1.16 0.41
 -11 -5 2 0.71 0.59
 11 5 2 2.37 0.54
 -11 -5 2 1.05 0.54
 -11 -5 2 0.73 0.56
 11 -5 -2 1.68 0.42
 -11 5 -2 1.37 0.32
 11 5 2 0.96 0.6
 11 5 2 2.11 0.54
 11 5 -2 0.87 0.58
 11 5 -2 1.03 0.53
 -11 5 2 2.03 0.47
 -11 -5 -2 1.54 0.55
 -11 -5 -2 1.38 0.63
 -11 -5 -2 1.92 0.62
 -11 -5 -2 1.07 0.52
 11 -5 2 1.3 0.42
 -11 5 2 1.48 0.46
 11 5 -2 1.35 0.57
 -11 5 2 1.05 0.36
 11 6 2 18.23 1.1
 -11 -6 2 20.47 1.24
 11 -6 -2 18.77 0.92
 -11 6 -2 17.41 0.94
 11 -6 -2 20.04 1.01
 11 -6 -2 17.79 0.97
 11 6 2 18.6 1.13
 -11 -6 2 20.35 1.42
 11 6 2 20.81 1.24
 -11 -6 2 18.07 1.12
 -11 -6 2 19.37 1.16
 -11 6 -2 20.09 0.92
 -11 -6 -2 19.33 1.12
 11 6 -2 18.84 1.18
 11 6 -2 20.85 1.19
 -11 6 2 16.86 0.98
 11 -6 2 18.52 0.96
 -11 -6 -2 19.18 1.09
 -11 6 2 18.73 1
 -11 6 2 18.19 0.83
 -11 -6 -2 19.52 1.24
 -11 -6 -2 19.96 1.43
 11 6 -2 18.87 1.12
 11 7 2 3.49 0.75
 -11 -7 2 4.53 0.74
 11 7 2 4.26 0.7
 11 7 2 3.91 0.75
 -11 -7 2 3.82 0.75
 11 -7 -2 4.78 0.65
 -11 7 -2 4.91 0.63
 11 -7 -2 3.48 0.65
 -11 -7 2 3.23 0.71
 -11 -7 2 2.42 0.74
 -11 7 -2 3.09 0.59
 -11 7 2 2.51 0.64
 11 7 -2 4.28 0.73
 -11 -7 -2 2.63 0.73
 -11 -7 -2 5.34 0.73
 -11 7 2 3.22 0.57
 -11 -7 -2 3.12 0.71
 11 -7 2 4.62 0.62
 -11 -7 -2 4.52 0.78
 11 7 -2 3.9 0.7
 11 7 -2 4.67 0.72
 -11 7 2 4.58 0.64
 11 8 2 10.06 0.87
 -11 -8 2 10.03 0.93
 -11 -8 2 11.02 0.94
 11 8 2 12.01 0.94
 -11 8 -2 10.84 0.78
 11 8 2 10.44 0.93
 -11 -8 2 9.55 0.99
 11 -8 -2 11.52 0.82
 -11 8 -2 10.52 0.81
 11 8 -2 10.28 0.92
 -11 -8 -2 11.41 0.95
 -11 8 2 10.22 0.82
 11 8 -2 9.56 0.9
 -11 8 2 9.99 0.81
 -11 8 2 10.5 0.76
 11 8 -2 9.83 0.89
 11 -8 2 10.56 0.78
 11 -8 2 11.97 0.81
 -11 -8 -2 11.18 0.91
 -11 -8 -2 9.57 0.88
 -11 -9 2 -0.11 0.81
 11 9 2 0.71 0.75
 11 -9 -2 1.34 0.73
 11 9 2 -0.59 0.84
 -11 9 -2 0.87 0.71
 -11 -9 2 1.9 0.83
 -11 9 -2 1.96 0.71
 -11 -9 2 -0.68 0.83
 -11 -9 2 1.14 0.8
 11 9 2 -0.06 0.95
 -11 -9 -2 1.65 1.02
 -11 9 2 -0.3 0.73
 11 -9 2 1.02 0.68
 11 9 -2 -0.48 0.78
 11 9 -2 2.41 0.81
 11 -9 2 2.58 0.74
 -11 -9 -2 -0.25 1.34
 -11 -9 -2 0.58 0.8
 11 9 -2 1.53 0.8
 -11 -9 -2 0.27 0.74
 -11 9 2 1.24 0.75
 11 10 2 1.12 0.88
 -11 -10 2 2.48 0.88
 -11 10 -2 0.8 0.76
 11 10 2 -0.08 0.9
 11 -10 -2 2.64 0.84
 -11 -10 2 2.57 0.85
 11 10 2 0.84 0.82
 -11 10 -2 1.91 1.28
 11 -10 -2 1.31 0.82
 -11 -10 2 1.62 0.95
 -11 -10 2 2.75 0.91
 -11 10 2 2.76 0.85
 -11 -10 -2 0.74 0.95
 11 -10 2 2.32 0.8
 -11 -10 -2 1.04 0.88
 11 10 -2 0.44 0.86
 11 -10 2 0.47 0.75
 11 10 -2 1.68 0.87
 -11 -10 -2 0.4 0.85
 11 10 -2 1.42 0.92
 -11 -10 -2 1.9 0.91
 -11 10 2 0.45 0.83
 -11 -11 2 -0.37 0.86
 -11 -11 2 0.11 0.94
 11 11 2 -1.36 0.93
 -11 11 -2 0.95 0.86
 11 -11 -2 0.95 0.9
 -11 11 -2 0.48 0.8
 -11 -11 2 1.23 1.03
 11 11 2 0.58 0.85
 -11 11 -2 0.48 0.79
 11 11 2 0.47 1.01
 -11 -11 2 2.24 0.99
 -11 -11 -2 0.15 0.92
 -11 -11 -2 1.62 0.86
 11 -11 2 -0.32 0.82
 -11 11 2 0.35 0.84
 11 -11 2 1.65 0.87
 -11 11 2 -0.24 0.74
 11 11 -2 1.82 0.93
 -11 -11 -2 0.05 0.99
 -11 11 2 0.71 0.89
 -11 -11 -2 -0.81 0.91
 11 11 -2 1.79 0.89
 -11 -12 2 2.13 1.11
 -11 -12 2 1.5 1.07
 11 12 2 1.07 1.02
 11 12 2 2.88 1.13
 -11 -12 2 0.7 0.89
 11 12 2 0.63 0.93
 11 -12 -2 0.03 0.98
 -11 12 -2 0.74 0.93
 -11 12 2 -0.37 0.85
 11 -12 2 -1.25 0.92
 11 -12 2 0.46 0.87
 -11 -12 -2 -0.72 0.99
 -11 12 2 -0.02 0.92
 -11 12 2 -0.27 0.92
 -11 -12 -2 1.59 0.99
 11 12 -2 2.78 1.09
 11 12 -2 -0.53 0.99
 11 12 -2 1.06 1.03
 -11 -12 -2 -1.06 0.91
 -11 -13 2 3.93 1.12
 -11 13 -2 3.57 1.01
 11 13 2 3.63 1.12
 -11 -13 2 2.24 1.14
 11 -13 -2 2.72 1.04
 11 13 2 2 1.24
 -11 -13 2 3.59 1.06
 -11 -13 2 2.05 0.99
 11 13 2 3.65 1.15
 -11 13 -2 3.64 1
 -11 13 -2 3.72 1.09
 -11 13 2 2.24 1.11
 11 -13 2 3.66 0.99
 -11 13 2 3.1 0.92
 11 13 -2 2.56 1.17
 11 13 -2 3.19 1.1
 -11 -13 -2 2.22 1.18
 -11 -13 -2 3.83 1.06
 -11 -13 -2 4.43 1.15
 11 13 -2 5.15 1.2
 -11 14 -2 2.22 1.1
 -11 14 -2 0.47 1.08
 11 14 2 0.78 1.37
 11 -14 -2 0.23 1.05
 -11 -14 2 1.01 1.31
 -11 -14 2 -0.06 1.04
 11 -14 -2 -0.42 1.1
 -11 -14 2 -1.79 1.15
 11 14 2 -1 1.2
 -11 14 -2 1.87 1.11
 11 14 2 -0.28 1.12
 11 -14 2 1.72 1.08
 11 -14 2 0.68 1
 11 14 -2 0.59 1.19
 11 14 -2 2.74 1.27
 11 14 -2 -0.71 1.6
 -11 14 2 1.92 0.94
 -11 -14 -2 -1.47 1.2
 -11 14 2 -0.13 1.18
 -11 14 2 -0.85 1.1
 -11 -14 -2 1.51 1.21
 -11 -14 -2 1.88 1
 -12 0 -2 13.32 0.83
 -12 0 2 13.11 1.07
 -12 0 -2 12.85 0.97
 -12 -1 2 38.24 1.5
 -12 1 -2 35.45 1.21
 -12 1 -2 35.53 1.31
 -12 1 2 33.66 1.11
 -12 -1 -2 35.63 1.26
 -12 1 2 36.18 1.38
 -12 -2 2 2.36 0.46
 -12 2 -2 1.57 0.46
 -12 -2 2 1.39 0.58
 -12 2 -2 1.62 0.41
 -12 -2 2 1.87 0.45
 12 2 -2 1.78 0.46
 12 2 -2 1.45 0.32
 -12 2 2 2.02 0.46
 12 2 -2 1.55 0.38
 -12 -2 -2 1.68 0.58
 -12 -2 -2 1.63 0.52
 -12 2 2 1.15 0.36
 -12 -3 2 5.77 0.57
 12 3 2 6.88 0.61
 12 3 2 6.41 0.62
 -12 -3 2 6.01 0.68
 12 -3 -2 5.23 0.57
 -12 -3 -2 5.53 0.47
 -12 -3 -2 5.51 0.6
 12 3 -2 6.14 0.56
 -12 3 2 5.12 0.51
 -12 4 -2 3.48 0.45
 -12 -4 2 3.28 0.54
 -12 -4 2 4.19 0.62
 12 4 2 3.14 0.61
 -12 -4 2 3.3 0.65
 -12 -4 2 3.69 0.59
 12 -4 -2 4.37 0.47
 12 -4 -2 3.38 0.52
 12 4 2 3.98 0.51
 -12 -4 -2 4.07 0.52
 12 4 -2 4.33 0.59
 -12 4 2 3.37 0.44
 -12 4 2 3.14 0.46
 -12 -4 -2 3.02 0.65
 12 4 -2 3.24 0.54
 12 4 -2 4.18 0.6
 -12 -4 -2 3.9 0.51
 -12 4 2 4.63 0.43
 -12 -4 -2 4.78 0.65
 -12 4 2 4.52 0.41
 12 5 2 9.17 0.78
 12 5 2 9.9 0.69
 12 -5 -2 8.94 0.61
 -12 -5 2 10.28 0.71
 -12 -5 2 8.91 0.86
 -12 -5 2 9.74 0.73
 12 5 2 9.99 0.7
 -12 -5 2 11.09 0.78
 12 -5 -2 9.18 0.61
 -12 -5 -2 8.17 0.81
 12 5 -2 11.69 1.01
 12 5 -2 10.85 0.76
 -12 5 2 10.31 0.6
 -12 -5 -2 9.92 0.69
 12 5 -2 10.53 0.93
 -12 -5 -2 10.77 0.72
 -12 -5 -2 9.94 0.8
 12 6 2 3.12 0.63
 -12 -6 2 2.91 0.7
 12 -6 -2 2.19 0.48
 -12 -6 2 2.72 0.71
 -12 -6 2 3.05 0.65
 -12 -6 2 3.41 0.7
 12 6 2 2.68 0.67
 12 -6 -2 3.11 0.59
 -12 6 -2 3.11 0.51
 -12 6 -2 3.5 0.51
 12 6 2 2.53 0.69
 -12 -6 -2 2.65 0.72
 -12 6 2 1.89 0.56
 -12 -6 -2 2.66 0.66
 -12 6 2 3.35 0.57
 12 -6 2 3.61 0.53
 12 6 -2 2.7 0.67
 -12 -6 -2 2.42 0.72
 12 6 -2 4.09 0.69
 12 6 -2 1.96 0.68
 -12 6 2 2.86 0.4
 12 -6 2 2.67 0.45
 -12 -6 -2 2.25 0.61
 -12 7 -2 31.75 1.24
 12 7 2 32.01 1.47
 12 -7 -2 32.64 1.19
 -12 -7 2 31.89 2.14
 12 7 2 33.01 1.57
 -12 -7 2 33.21 1.48
 -12 -7 2 32.38 1.45
 12 7 2 29.59 1.4
 -12 7 -2 32.49 1.25
 -12 -7 2 32.93 1.58
 -12 -7 -2 33.46 1.95
 12 7 -2 31.73 1.44
 -12 7 2 32.41 1.28
 -12 -7 -2 34.81 1.6
 -12 7 2 30.81 1.31
 -12 -7 -2 32.76 1.47
 -12 -7 -2 33.94 1.42
 -12 7 2 31.23 1.31
 12 -7 2 33.49 1.27
 12 7 -2 33.54 1.47
 12 7 -2 35.15 1.53
 12 -8 -2 4.54 0.72
 -12 -8 2 5.03 0.88
 -12 -8 2 6.06 0.83
 12 8 2 4.17 0.82
 12 8 2 6.67 1.35
 12 8 2 5.96 0.85
 -12 -8 2 4.83 0.86
 -12 8 -2 5.64 0.73
 -12 -8 2 6.49 0.88
 -12 8 -2 6.13 0.69
 -12 -8 -2 4.55 0.81
 12 8 -2 5.96 0.85
 -12 -8 -2 4.54 0.86
 -12 8 2 4.26 0.65
 -12 -8 -2 4.36 0.89
 12 -8 2 6.31 0.73
 12 -8 2 5.83 0.68
 12 8 -2 5.64 0.87
 -12 8 2 4.66 0.73
 12 8 -2 4.39 0.83
 -12 -8 -2 4.31 0.83
 -12 -9 2 12.76 1.07
 12 -9 -2 10.4 1.42
 12 -9 -2 12.33 0.9
 12 9 2 12.49 1.01
 -12 -9 2 9.07 1
 12 9 2 10.31 1
 -12 9 -2 12.55 0.89
 -12 9 -2 12.75 1.11
 -12 -9 2 10.93 1.02
 12 9 2 9.29 0.99
 12 9 -2 10.91 1.53
 -12 9 2 12.15 0.91
 12 9 -2 10.42 0.99
 12 9 -2 11.36 1.02
 -12 -9 -2 9.66 1.07
 -12 -9 -2 9.06 1.02
 12 -9 2 10.51 0.86
 -12 -9 -2 11.68 0.99
 -12 -9 -2 11.34 1.04
 12 -9 2 12.18 0.87
 -12 9 2 10.9 0.9
 12 10 2 7.46 0.94
 12 10 2 9.02 1.07
 12 10 2 7.34 1.03
 -12 -10 2 8.56 0.97
 -12 10 -2 8.32 0.9
 -12 10 -2 8.67 0.91
 12 -10 -2 7.3 0.95
 -12 -10 2 6.72 0.98
 12 -10 -2 8.41 0.9
 -12 -10 2 8.03 1.08
 -12 -10 2 9.31 1.06
 12 -10 2 7.35 0.84
 -12 -10 -2 9.51 0.99
 -12 10 2 7.45 0.92
 -12 -10 -2 6.79 1.02
 12 10 -2 7.85 1.11
 -12 10 2 7.86 0.83
 12 10 -2 7.41 1
 -12 10 2 8.14 0.92
 12 -10 2 9.99 0.92
 12 10 -2 9.79 1.05
 -12 11 -2 10.19 1.01
 -12 -11 2 12.69 1.18
 12 11 2 11.2 1.13
 12 11 2 11.76 1.12
 -12 11 -2 11.49 1.03
 -12 11 -2 10.42 0.96
 12 -11 -2 10.22 1.01
 -12 -11 2 9.31 1.13
 12 11 2 9.55 1.1
 -12 -11 2 12.07 1.17
 12 -11 -2 12.98 1.06
 -12 -11 -2 10.28 1.18
 12 11 -2 10.82 1.09
 12 -11 2 10.94 1.04
 -12 -11 -2 11.95 1.19
 12 11 -2 9.68 1.07
 12 -11 2 12.37 1.01
 -12 -11 -2 10.76 1.14
 12 11 -2 11.66 1.12
 -12 11 2 11.33 1.04
 -12 11 2 11.8 1.02
 -12 -11 -2 10.19 1.08
 -12 11 2 9.5 0.93
 12 12 2 4.59 0.96
 -12 -12 2 3.37 1.09
 -12 -12 2 3.53 1.15
 -12 -12 2 4.4 1.05
 12 -12 -2 6.39 1
 12 -12 -2 3.73 1.05
 12 12 2 3.13 1.22
 12 12 2 4.99 1.08
 -12 -12 2 5.27 1.13
 -12 12 2 2.68 0.89
 12 -12 2 5.06 0.92
 -12 12 2 6.49 1.03
 12 12 -2 3.41 1.05
 -12 -12 -2 6.18 1.11
 -12 -12 -2 4.64 0.98
 12 -12 2 3.1 0.98
 12 12 -2 4.91 1.1
 12 12 -2 5.7 1.23
 -12 -12 -2 4.01 1.09
 12 -13 -2 8.14 1.18
 12 -13 -2 7.47 1.21
 12 13 2 6.41 1.21
 -12 -13 2 6.78 1.14
 -12 -13 2 7.66 1.27
 12 13 2 9.63 1.18
 -12 13 -2 8.42 1.16
 12 13 2 8.07 1.34
 -12 13 -2 7.4 1.1
 -12 13 -2 8.63 1.14
 -12 -13 2 7.41 1.23
 -12 -13 2 9.68 1.24
 12 13 -2 9.29 1.24
 12 -13 2 9.18 1.08
 -12 -13 -2 8.41 1.25
 -12 13 2 9.4 1.04
 12 13 -2 9.71 1.29
 -12 -13 -2 9.32 1.19
 -12 -13 -2 11.33 1.36
 -12 13 2 9.44 1.21
 -12 -13 -2 8.21 1.16
 12 13 -2 7.9 1.29
 -12 13 2 10.96 1.21
 12 -13 2 7.25 1.17
 12 -14 -2 4.37 1.25
 -12 -14 2 3.44 1.3
 -12 14 -2 2.99 1.17
 12 14 2 2.37 1.4
 12 14 2 2.52 1.25
 12 -14 -2 3.52 1.22
 -12 -14 2 3.21 1.37
 -12 -14 2 0.58 1.34
 12 14 2 5.1 1.4
 -12 14 -2 3.18 1.2
 -12 14 2 4.47 1.2
 -12 -14 -2 1.94 1.31
 -12 -14 -2 2.38 1.32
 -12 14 2 4.3 1.04
 12 -14 2 3.32 1.13
 -12 -14 -2 2.49 1.29
 -12 -14 -2 1.11 1.07
 12 14 -2 3.16 1.31
 12 14 -2 2.74 1.3
 -13 0 2 41.75 1.53
 -13 0 -2 40.22 1.48
 -13 0 -2 38.01 1.34
 -13 0 2 36.31 1.23
 -13 -1 2 2.95 0.47
 -13 -1 2 2.59 0.58
 -13 1 -2 2.94 0.49
 -13 1 -2 2.51 0.47
 -13 -1 -2 3.01 0.52
 -13 1 2 2.92 0.53
 -13 -1 -2 3.39 0.54
 -13 1 2 2.24 0.42
 -13 -2 2 8.6 0.77
 -13 2 -2 7.95 0.57
 -13 2 -2 7.99 0.61
 -13 -2 2 7.88 0.61
 -13 -2 2 8.5 0.7
 -13 2 2 7.74 0.67
 -13 -2 -2 9.36 0.76
 -13 2 2 8.7 0.64
 13 2 -2 8.8 0.6
 -13 -3 2 3.17 0.48
 -13 -3 2 2.77 0.52
 13 3 2 2.94 0.6
 -13 3 -2 2.86 0.48
 -13 -3 2 3.08 0.69
 -13 -3 2 3.8 0.57
 13 3 -2 3.6 0.48
 -13 3 2 2.3 0.5
 13 3 -2 2.16 0.53
 -13 -3 -2 3.88 0.62
 -13 -4 2 2.59 0.68
 -13 -4 2 3.89 0.63
 -13 -4 2 2.65 0.55
 -13 4 -2 1.77 0.46
 -13 -4 2 3.58 0.57
 13 4 2 3.63 0.51
 13 4 2 2.77 0.63
 -13 -4 -2 3.39 0.67
 -13 -4 -2 1.79 0.72
 13 4 -2 2.87 0.59
 13 4 -2 3.4 0.54
 13 4 -2 2.28 0.59
 -13 4 2 1.99 0.41
 -13 -5 2 9.73 0.81
 -13 -5 2 8.35 0.86
 13 5 2 9.46 0.75
 13 5 2 9.93 0.8
 -13 -5 2 11.37 0.93
 -13 -5 -2 10.41 0.9
 -13 5 2 9.64 0.79
 -13 -5 -2 7.82 0.8
 13 5 -2 8.04 0.73
 -13 -6 2 3.95 0.76
 13 6 2 3.74 0.7
 13 6 2 2.14 0.64
 -13 -6 2 2.87 0.67
 13 6 2 4.24 0.75
 -13 -6 2 2.78 1.33
 -13 -6 2 3.58 0.71
 -13 -6 -2 3.37 0.76
 -13 -6 -2 3.57 0.66
 13 6 -2 3.32 0.69
 -13 6 2 2.86 0.55
 13 6 -2 2.87 0.68
 -13 -6 -2 3.4 0.67
 -13 6 2 3.31 0.63
 -13 -6 -2 2.79 0.92
 -13 -7 2 1.09 0.84
 -13 -7 2 -0.26 0.69
 13 7 2 1.73 0.71
 -13 -7 2 2.66 0.81
 13 7 2 -0.43 0.72
 13 -7 -2 2.07 0.9
 13 7 2 1 0.68
 -13 7 -2 0.7 0.55
 -13 -7 -2 0.73 0.7
 -13 7 2 1.56 0.6
 -13 -7 -2 0.6 0.8
 -13 -7 -2 0.07 0.74
 -13 7 2 1.56 0.62
 -13 7 2 1.41 0.39
 13 7 -2 1.58 0.72
 13 7 -2 0.98 0.72
 -13 7 2 0.99 0.56
 13 7 -2 0.33 0.7
 13 -7 2 0.19 0.56
 -13 -7 -2 0.69 0.66
 13 8 2 -0.38 0.78
 -13 -8 2 0.33 0.83
 -13 -8 2 0.45 0.76
 13 8 2 0.75 0.92
 -13 -8 2 0.48 0.78
 -13 8 -2 0.97 0.62
 13 -8 -2 0.7 0.65
 -13 -8 2 -1.05 0.78
 13 -8 -2 0.3 0.69
 13 8 2 -0.43 0.73
 -13 8 -2 1.67 0.62
 -13 8 2 0.5 0.59
 -13 -8 -2 1.3 0.82
 13 8 -2 1.39 0.77
 13 8 -2 0.73 0.79
 -13 -8 -2 -0.75 1.01
 -13 -8 -2 0.46 0.74
 13 8 -2 0.29 0.76
 -13 9 -2 6.42 0.77
 13 9 2 6.91 0.87
 -13 -9 2 6.41 0.95
 -13 9 -2 7.46 0.76
 13 9 2 5.93 0.94
 13 9 2 7.92 0.98
 13 -9 -2 7.11 0.87
 13 -9 -2 8.22 0.83
 -13 -9 2 7.65 0.93
 -13 -9 2 8.18 0.96
 13 9 -2 6.77 0.94
 -13 9 2 8.11 0.83
 -13 9 2 6.18 0.75
 -13 -9 -2 5.61 0.91
 13 9 -2 5.81 0.97
 13 9 -2 7.6 0.96
 -13 -9 -2 6.65 1.05
 -13 9 2 8 1.32
 13 -9 2 6.27 0.83
 13 -10 -2 4.25 0.86
 -13 10 -2 3.44 0.82
 -13 10 -2 4.05 0.82
 13 10 2 3.7 0.92
 -13 -10 2 5.57 0.94
 -13 10 -2 2.95 0.78
 -13 -10 2 3.22 0.97
 -13 -10 2 2.86 0.92
 13 10 2 4.98 1.03
 13 10 2 4.13 0.97
 -13 -10 2 5.11 0.96
 13 10 -2 3.23 0.92
 -13 10 2 3.2 0.75
 13 10 -2 3.27 0.92
 -13 10 2 4.03 0.87
 -13 -10 -2 2.83 1
 -13 10 2 3.95 0.86
 -13 -10 -2 3.84 0.86
 13 -10 2 4.55 0.83
 -13 -10 -2 5.73 1.01
 -13 -10 -2 3.16 0.8
 13 -10 2 4.72 0.81
 13 10 -2 4.84 1
 -13 -11 2 4.19 1.05
 13 11 2 5.17 1.07
 -13 11 -2 3.92 0.88
 13 -11 -2 2.55 0.89
 13 11 2 2.34 1.05
 13 -11 -2 3.17 0.99
 -13 -11 2 3.92 1.02
 -13 11 -2 4.98 1.53
 -13 -11 2 2.44 1
 -13 -11 2 3.39 1.06
 -13 11 -2 3.81 0.89
 -13 -11 -2 3.87 1.02
 13 11 -2 3.18 1.06
 13 11 -2 1.22 1
 13 -11 2 2.94 0.82
 -13 11 2 2.5 0.83
 -13 11 2 3.38 0.95
 -13 -11 -2 2.12 0.94
 -13 11 2 2.09 0.9
 13 -11 2 2.67 0.9
 13 11 -2 4.24 0.98
 -13 -11 -2 3.86 1.02
 -13 12 -2 1.77 1
 13 12 2 4.35 1.09
 13 -12 -2 5.12 1.01
 13 12 2 3.16 1.1
 13 -12 -2 2.73 1.02
 -13 12 -2 3.22 0.94
 -13 -12 2 4.81 1.17
 -13 -12 2 1.91 1.01
 13 12 2 1.8 1.1
 -13 12 -2 5.59 0.98
 -13 -12 2 2.27 1.14
 -13 -12 2 3.15 1.06
 13 -12 2 4 0.99
 13 12 -2 4.18 1.06
 13 12 -2 3.36 1.1
 -13 12 2 2.73 1.01
 -13 12 2 4.62 0.92
 -13 -12 -2 4.13 1.01
 13 -12 2 3.97 0.91
 -13 -12 -2 2.34 1.17
 -13 -12 -2 4.65 1.13
 -13 -12 -2 4.46 1.14
 -13 -13 2 2.46 1.09
 -13 -13 2 3.06 1.14
 13 13 2 1.95 1.05
 -13 13 -2 1.72 1.02
 -13 -13 2 3.36 1.17
 -13 13 -2 1.12 1
 -13 13 -2 0.44 1.01
 13 -13 -2 2.05 1.1
 13 -13 -2 3.15 1.04
 13 13 2 -0.99 1.16
 -13 13 2 1.01 0.93
 -13 13 2 3.12 1.08
 13 13 -2 -0.33 1.25
 13 -13 2 2.35 1.01
 -13 -13 -2 1.11 1.03
 -13 13 2 1.81 1.11
 13 -13 2 0.1 1.06
 -13 -13 -2 3.79 1.19
 -13 -13 -2 2.89 1.22
 13 13 -2 -0.23 1.19
 -13 -13 -2 0.72 1.16
 13 13 -2 0.7 1.16
 -14 0 -2 5.15 0.57
 -14 0 2 5.25 0.65
 -14 0 -2 5 0.59
 -14 0 2 4.43 0.5
 -14 1 -2 1.88 0.55
 -14 -1 2 1.3 0.47
 -14 -1 2 1.64 0.63
 -14 1 -2 1.39 0.51
 -14 1 2 2.53 0.56
 -14 1 2 0.6 0.43
 -14 -1 -2 1.81 0.56
 -14 -1 -2 1.27 0.54
 -14 -2 2 5.12 0.57
 -14 2 -2 4.89 0.54
 -14 2 -2 3.73 0.57
 -14 -2 2 4.34 0.71
 -14 -2 -2 5.6 0.65
 -14 -2 -2 5.66 0.7
 -14 2 2 4.37 0.47
 -14 2 2 4.8 0.62
 -14 -3 2 -0.5 0.52
 -14 -3 2 0.27 0.48
 -14 3 -2 0.52 0.5
 -14 -3 2 1.5 0.57
 -14 -3 2 0.45 0.67
 -14 -3 -2 0.81 0.66
 14 3 -2 0.36 0.55
 14 3 -2 0.11 0.42
 -14 3 2 0.62 0.52
 -14 3 2 0.17 0.41
 -14 -3 -2 0.65 0.61
 14 4 2 16.45 0.84
 -14 -4 2 16.35 0.99
 -14 -4 2 19.32 0.95
 -14 -4 2 17.04 1.52
 -14 4 -2 16.65 1.03
 -14 4 -2 18.3 0.97
 14 4 2 18.29 1.22
 14 4 2 16.79 0.88
 -14 -4 -2 16.72 0.89
 -14 -4 -2 17.45 1.23
 -14 4 2 15.45 1.05
 14 4 -2 15.12 1.1
 -14 -4 -2 17.33 0.85
 14 4 -2 17.75 0.96
 -14 4 2 16.52 0.81
 -14 -5 2 -0.24 0.9
 -14 -5 2 1.32 0.68
 -14 -5 2 0.1 0.6
 14 5 2 0.94 0.65
 14 5 2 0.43 0.54
 -14 -5 2 -0.19 0.54
 -14 -5 -2 -0.47 0.69
 -14 -5 -2 0.77 0.53
 -14 5 2 -0.33 0.41
 14 5 -2 1.01 0.58
 -14 -5 -2 0.06 0.95
 -14 5 2 0.08 0.45
 14 5 -2 0.25 0.63
 14 5 -2 1.22 0.62
 14 6 2 11.73 0.9
 -14 -6 2 9.69 0.88
 -14 -6 2 8.56 0.82
 -14 -6 2 9.76 0.98
 -14 -6 2 9.68 0.79
 14 6 2 10.23 0.76
 14 6 2 10.61 0.78
 -14 6 2 10.84 0.65
 -14 -6 -2 11.44 0.79
 14 6 -2 10.15 0.8
 -14 -6 -2 10.88 0.95
 -14 6 2 9.96 0.66
 14 6 -2 11.01 0.85
 -14 -6 -2 10.77 0.77
 -14 -6 -2 8.62 0.93
 14 6 -2 9.81 0.83
 14 7 2 19.17 1.51
 -14 -7 2 19.84 1.24
 -14 -7 2 18.93 1.53
 14 -7 -2 20.46 1.12
 14 7 2 19.47 1.29
 14 7 2 22.11 1.29
 -14 -7 2 17.98 1.42
 14 7 -2 18.13 1.32
 -14 -7 -2 22.74 1.74
 -14 -7 -2 18.2 1.27
 14 7 -2 17.55 1.34
 14 7 -2 21.37 1.4
 -14 -7 -2 19.67 1.22
 -14 -7 -2 20.48 1.58
 -14 7 2 20.57 1.09
 -14 7 2 18.88 0.95
 -14 7 2 19.15 1.1
 -14 7 2 18.18 1.04
 -14 -8 2 -0.15 0.78
 -14 -8 2 1.75 0.92
 14 -8 -2 2.05 0.79
 14 8 2 0.26 0.8
 -14 -8 2 1.84 0.81
 -14 -8 2 2.63 0.85
 14 -8 -2 0.44 0.69
 14 8 2 1.1 0.83
 14 8 2 1.28 0.78
 -14 8 -2 1.04 0.6
 -14 -8 -2 1.59 0.79
 -14 8 2 1.11 0.66
 14 8 -2 1.38 0.8
 -14 8 2 0.38 0.64
 14 -8 2 0.57 0.46
 14 8 -2 1.25 0.78
 -14 -8 -2 1.66 0.91
 14 -8 2 2.53 0.63
 -14 -8 -2 1.79 0.8
 -14 -8 -2 1.1 0.78
 -14 -9 2 -0.03 0.86
 -14 9 -2 -0.02 0.66
 -14 9 -2 0.33 0.69
 14 9 2 0.26 0.86
 14 -9 -2 0.9 0.77
 14 -9 -2 1.37 0.7
 14 9 2 0.65 0.87
 -14 -9 2 -0.55 0.83
 -14 -9 2 1.15 0.85
 -14 -9 2 0.27 0.88
 -14 9 2 0.66 0.65
 -14 9 2 0.32 0.73
 14 9 -2 -0.32 0.82
 -14 9 2 0.83 0.73
 -14 -9 -2 0.44 0.82
 14 9 -2 -1.34 0.86
 14 9 -2 0.78 0.85
 -14 -9 -2 1.81 0.94
 14 -9 2 0.42 1.18
 -14 -9 -2 -0.31 0.8
 -14 -10 2 3.53 1
 14 -10 -2 5.32 0.9
 14 10 2 6.82 1.07
 -14 10 -2 3.55 0.86
 14 10 2 5.6 0.95
 14 10 2 4.79 1.02
 -14 -10 2 4.2 0.98
 14 -10 -2 6.05 0.82
 -14 -10 2 3.41 1.06
 -14 10 -2 4.78 0.8
 -14 10 -2 5.29 0.82
 14 10 -2 4.42 0.96
 14 10 -2 5.47 1.03
 -14 10 2 5.03 0.78
 14 10 -2 6.97 1.01
 -14 10 2 5.22 0.85
 14 -10 2 5.21 0.88
 -14 -10 -2 4.48 1.09
 -14 -10 -2 4.58 0.96
 -14 -10 -2 3.78 0.97
 -14 -11 2 0.7 0.96
 -14 11 -2 0.56 0.82
 -14 11 -2 1.27 0.87
 14 11 2 0.42 1.03
 -14 -11 2 2.97 1.08
 14 -11 -2 1.09 0.93
 14 11 2 2.31 1.04
 14 11 2 0.78 0.92
 14 -11 -2 0.38 0.83
 -14 -11 2 1.57 1.07
 -14 -11 -2 0.5 1.02
 -14 11 2 1.52 0.81
 -14 -11 -2 0.16 1.08
 14 11 -2 0.89 0.95
 -14 -11 -2 0.25 0.99
 -14 -11 -2 -0.4 0.97
 14 11 -2 2.68 1.02
 -14 11 2 2.54 0.89
 14 11 -2 2.65 1.02
 14 12 2 10.34 1.26
 14 -12 -2 10.49 1.14
 -14 -12 2 6.48 1.14
 -14 12 -2 7.26 1.1
 14 12 2 9.93 1.2
 -14 -12 2 6.99 1.31
 -14 12 -2 7.13 1
 -14 12 -2 10.14 1.07
 -14 -12 2 9.04 1.27
 14 12 2 8.59 1.26
 -14 12 2 8 1.06
 14 12 -2 10.27 1.23
 -14 -12 -2 7.74 1.24
 -14 -12 -2 7.73 1.13
 -14 -12 -2 11.53 1.28
 14 -12 2 9.5 1.03
 -14 12 2 7.59 0.98
 14 12 -2 8.77 1.22
 14 -12 2 8.88 1.14
 -14 -12 -2 7.84 1.16
 14 -13 -2 2.18 1.13
 -14 13 -2 1.07 1.06
 -14 -13 2 1.32 1.31
 14 13 2 0.58 1.32
 -14 13 -2 0.58 1.02
 -14 13 -2 2.54 1.1
 14 13 2 1.54 1.18
 14 -13 -2 1.85 1.14
 -14 -13 2 1.59 1.29
 -14 -13 -2 1.01 1.17
 -14 -13 -2 -0.79 1.17
 -14 13 2 3.03 1.14
 -14 13 2 -0.66 1.05
 14 13 -2 -0.66 1.21
 14 -13 2 0.24 1.11
 -14 -13 -2 0.88 1.18
 14 -13 2 2.63 1.09
 14 13 -2 3.72 1.28
 14 13 -2 2.11 1.22
 -14 -13 -2 0.48 1.28
 -14 13 2 2.88 0.97
 -15 0 -2 3.64 0.58
 -15 0 2 4.47 0.69
 -15 0 -2 3.49 0.62
 -15 1 -2 5.03 0.64
 -15 -1 2 5.67 0.56
 -15 1 -2 5.1 0.58
 -15 -1 2 5.36 0.71
 -15 1 2 5.18 0.64
 -15 -1 -2 6 0.73
 -15 -1 -2 5.81 0.64
 -15 2 -2 5.91 0.6
 -15 -2 2 6.54 0.63
 -15 -2 2 6.58 0.79
 -15 2 -2 5.15 0.63
 -15 -2 -2 6.7 0.68
 -15 2 2 5.44 0.51
 -15 2 2 4.57 0.63
 -15 -2 -2 5.77 0.73
 -15 3 -2 0.84 0.54
 -15 -3 2 0.27 0.72
 -15 -3 2 0.09 0.41
 -15 3 -2 1.76 0.49
 15 3 -2 1.37 0.57
 -15 -3 -2 1.4 0.72
 -15 3 2 0.85 0.56
 -15 -3 -2 1.21 0.66
 -15 3 2 0.84 0.44
 15 4 2 3.74 0.7
 -15 -4 2 3.19 0.71
 -15 4 -2 3.33 0.54
 -15 -4 2 2.94 0.57
 -15 4 -2 2.32 0.56
 -15 -4 2 3.65 0.69
 -15 -4 2 2.91 0.85
 -15 4 2 3.61 0.48
 15 4 -2 4.03 0.55
 15 4 -2 3.13 0.64
 -15 4 2 2.43 0.55
 -15 -4 -2 2.14 1.37
 -15 -5 2 2.41 0.74
 15 5 2 1.07 0.54
 -15 5 -2 1.48 0.53
 -15 -5 2 1.04 0.57
 15 5 2 1.11 0.43
 15 5 2 0.47 0.72
 -15 -5 2 0.9 0.59
 -15 -5 2 -0.24 0.75
 -15 5 2 0.38 0.5
 15 5 -2 1.92 0.65
 -15 5 2 1.96 0.45
 -15 -5 -2 2.13 0.56
 -15 -5 -2 0.95 0.77
 15 5 -2 1.4 0.6
 -15 -6 2 10.82 0.84
 -15 -6 2 9.53 0.76
 15 6 2 10.37 0.93
 -15 -6 2 8.07 0.97
 -15 6 2 8.97 0.6
 15 6 -2 10.37 0.82
 -15 -6 -2 10.7 0.77
 15 6 -2 9.03 0.83
 -15 -6 -2 8.36 0.97
 15 6 -2 9.92 0.84
 -15 -6 -2 9.51 0.74
 -15 6 2 8.83 0.59
 -15 -7 2 0.21 0.7
 15 -7 -2 -0.31 0.48
 -15 -7 2 -0.54 0.66
 -15 -7 2 -1.42 0.8
 15 7 2 -0.32 0.72
 15 7 2 -0.36 0.68
 15 7 2 0.22 0.77
 -15 7 2 -0.86 0.55
 -15 -7 -2 0.44 0.65
 -15 7 2 0.16 0.41
 -15 -7 -2 1.04 0.82
 -15 7 2 0.94 0.54
 15 7 -2 -0.11 0.72
 -15 7 2 -0.22 0.57
 -15 -7 -2 -0.36 1.44
 -15 -7 -2 1.35 0.93
 15 7 -2 0.62 0.73
 -15 -8 2 0.36 0.85
 15 8 2 2.04 0.87
 15 8 2 0.23 0.8
 -15 -8 2 -0.26 0.8
 15 -8 -2 0.05 0.68
 15 8 2 0.92 0.73
 -15 -8 2 1.49 0.75
 -15 -8 -2 -0.77 0.93
 15 8 -2 0.44 0.81
 -15 8 2 0.08 0.6
 -15 -8 -2 0.09 0.71
 15 8 -2 0.57 0.78
 -15 8 2 0.12 0.64
 15 -9 -2 2.08 1.12
 15 9 2 0.18 0.94
 -15 9 -2 0.9 0.79
 15 9 2 2.92 0.91
 -15 -9 2 1.78 0.96
 15 9 2 1.89 0.86
 -15 -9 2 2.32 0.92
 15 -9 -2 2.25 0.8
 -15 -9 2 1.81 0.85
 -15 9 2 1.68 0.68
 -15 -9 -2 1.12 0.99
 -15 9 2 2.08 0.74
 -15 -9 -2 1.66 0.89
 15 9 -2 0.99 0.89
 -15 -9 -2 1.36 0.92
 15 -9 2 1.15 0.58
 -15 -9 -2 1.22 0.82
 -15 9 2 1.11 0.7
 -15 10 -2 0.31 0.72
 -15 -10 2 2.99 1.04
 -15 10 -2 1.92 0.86
 -15 10 -2 1.86 0.76
 -15 -10 2 0.48 0.95
 15 -10 -2 0.6 0.82
 -15 -10 2 1.45 0.94
 15 10 2 0.19 0.93
 15 -10 -2 0.48 0.72
 -15 -10 2 1.52 0.96
 -15 10 2 3.06 0.75
 -15 -10 -2 -0.63 1
 15 10 -2 1.7 0.97
 -15 -10 -2 1.3 0.95
 -15 -10 -2 2.01 0.96
 15 -10 2 1.77 0.76
 -15 10 2 1.59 0.8
 15 10 -2 0.3 0.96
 -15 10 2 0.1 0.8
 -15 -11 2 -0.33 1.11
 -15 11 -2 0.72 0.9
 15 -11 -2 1.09 0.85
 -15 11 -2 -0.34 0.79
 15 11 2 0.92 1.03
 -15 -11 2 0.42 1.15
 15 11 2 0.25 1.03
 -15 -11 2 0.46 1.02
 -15 -11 2 0.67 1.1
 15 11 2 2.28 1.04
 -15 11 -2 0.54 0.79
 -15 -11 -2 0.66 1
 -15 11 2 -0.16 0.79
 15 11 -2 -1.32 1.06
 -15 -11 -2 2.09 1.02
 -15 11 2 1.41 0.93
 15 -11 2 1.7 0.87
 -15 -11 -2 -1.41 1.12
 15 11 -2 1.26 1.06
 15 -11 2 1.17 0.85
 15 -12 -2 3.66 1.01
 15 12 2 3.22 1.2
 -15 -12 2 4.04 1.31
 -15 -12 2 2.02 1.27
 -15 12 -2 2 0.98
 -15 -12 2 1.81 1.2
 -15 -12 2 2.85 1.21
 -15 12 -2 3.48 0.98
 15 -12 -2 2.21 1.03
 15 -12 2 2.79 1
 15 12 -2 3.28 1.21
 -15 12 2 3.95 1.04
 15 -12 2 4.95 0.95
 -15 -12 -2 4.09 1.16
 -15 -12 -2 5.18 1.17
 -15 12 2 2.86 0.94
 -15 -12 -2 2.59 1.25
 -15 -12 -2 3.65 1.12
 -16 0 -2 8.92 0.71
 -16 0 2 8.19 0.62
 -16 0 -2 8.57 0.78
 -16 1 -2 0.42 0.52
 -16 1 -2 0.2 0.6
 -16 -1 2 1.74 0.67
 -16 -1 2 0.6 0.51
 -16 -1 -2 -0.14 0.62
 -16 1 2 0.71 0.61
 -16 -1 -2 0.53 0.59
 -16 2 -2 6.06 0.65
 -16 2 -2 5.76 0.67
 -16 -2 2 7.53 0.89
 -16 -2 2 7.78 0.66
 -16 2 2 6.79 0.72
 -16 -2 -2 6.91 0.84
 -16 2 2 5.36 0.54
 -16 -2 -2 6.85 0.71
 -16 3 -2 0.05 0.58
 -16 -3 2 1.21 0.76
 -16 3 2 0.51 0.61
 -16 -3 -2 1.35 0.84
 -16 3 2 1.18 0.47
 -16 -3 -2 0.85 0.66
 -16 -4 2 3.64 0.58
 -16 4 -2 3.44 0.58
 -16 -4 2 2.49 0.5
 -16 -4 2 1.86 0.86
 -16 -4 -2 3.33 0.78
 -16 4 2 2.77 0.6
 16 4 -2 2.73 0.58
 16 4 -2 2.71 0.67
 -16 4 2 2.63 0.49
 -16 -4 -2 2.8 0.86
 -16 -5 2 1.15 0.81
 -16 5 -2 1.06 0.53
 -16 -5 2 0.82 0.6
 -16 -5 2 1.48 0.63
 16 5 2 1.58 0.76
 -16 -5 -2 1.52 0.56
 -16 -5 -2 2.07 0.5
 16 5 -2 1.95 0.7
 -16 5 2 1.31 0.54
 -16 5 2 0.95 0.46
 -16 -5 -2 0.79 0.81
 16 5 -2 1.8 0.6
 16 6 2 7.82 0.7
 -16 -6 2 6.26 0.97
 -16 -6 2 7.29 0.74
 -16 -6 2 8.63 0.95
 -16 6 -2 6.97 0.67
 16 6 -2 5.96 0.87
 -16 -6 -2 7.56 0.69
 16 6 -2 8.58 0.85
 -16 -6 -2 8.32 1.01
 -16 -6 -2 7.18 0.98
 -16 6 2 7.1 0.56
 16 6 -2 8.29 0.81
 -16 6 2 6.02 0.59
 -16 -6 -2 8.45 0.73
 16 7 2 -1.13 0.8
 16 7 2 1.19 0.68
 -16 -7 2 0.59 0.74
 -16 -7 2 -0.73 0.89
 -16 -7 2 0.06 0.87
 16 7 2 1.1 0.73
 16 7 -2 -0.16 0.71
 -16 7 2 -0.35 0.56
 -16 -7 -2 1.49 0.92
 -16 -7 -2 -0.01 0.64
 -16 -7 -2 1.33 0.91
 16 7 -2 0.75 0.75
 16 7 -2 0.39 0.83
 -16 -7 -2 0.16 0.68
 -16 7 2 0.32 0.47
 -16 -8 2 2.77 0.96
 16 8 2 3.79 0.92
 16 8 2 2.39 0.79
 -16 -8 2 2.81 0.97
 16 8 2 3.39 0.79
 -16 -8 2 2.89 0.78
 -16 -8 2 1.5 0.85
 -16 8 2 2.3 0.61
 16 8 -2 2.81 0.82
 -16 8 2 2.08 0.66
 16 8 -2 2.36 0.89
 -16 -8 -2 3.61 0.84
 -16 8 2 1.69 0.65
 16 8 -2 2.11 0.84
 -16 -8 -2 2.57 0.76
 -16 -8 -2 4.01 0.98
 16 9 2 3.59 0.89
 -16 -9 2 2.55 1.15
 16 9 2 3.99 0.98
 16 -9 -2 3.09 0.76
 -16 -9 2 3.96 1.03
 16 9 -2 2.4 0.9
 -16 9 2 1.68 0.69
 16 9 -2 2.46 0.92
 -16 -9 -2 3.71 0.9
 -16 9 2 4.07 0.7
 -16 -9 -2 5 1.09
 -16 9 2 4.92 0.9
 -16 -10 2 1.45 1.12
 -16 -10 2 4.56 1.01
 -16 -10 2 1.5 1.1
 16 10 2 4.53 0.94
 16 10 2 1.65 0.99
 16 -10 -2 3.21 0.87
 -16 -10 2 3.12 0.95
 -16 10 -2 2.7 0.75
 -16 10 -2 3.44 1.43
 16 10 2 1.14 1.02
 -16 10 2 3.21 0.79
 16 10 -2 3.79 0.97
 -16 -10 -2 1.97 1.18
 -16 10 2 2.81 0.77
 -16 10 2 2.51 0.77
 -16 -10 -2 2.51 0.95
 16 10 -2 1.05 1.01
 16 10 -2 1.89 1.02
 -16 -11 2 -0.72 1
 16 -11 -2 3.04 0.91
 -16 11 -2 0.5 0.83
 -16 -11 2 -0.78 1.05
 16 11 2 1.59 1.1
 -16 -11 2 0.59 1.18
 16 11 2 1.68 1.01
 -16 11 -2 1.16 0.82
 16 -11 -2 0.12 0.87
 -16 -11 -2 1.4 1.01
 16 11 -2 1.3 1.08
 -16 -11 -2 0.83 0.99
 16 11 -2 0.64 1.11
 16 -11 2 1.2 0.84
 -16 11 2 3.06 0.91
 16 11 -2 1.79 1.1
 -16 11 2 1.25 0.89
 -17 0 2 18.45 1.05
 -17 0 2 18.41 1.53
 -17 0 -2 21.06 1.43
 -17 0 -2 19.77 1.17
 -17 1 -2 0.32 0.61
 -17 1 -2 -0.17 0.57
 -17 -1 2 0.95 0.55
 -17 -1 2 2.04 1.23
 -17 1 2 1.1 0.66
 -17 -1 -2 0.65 0.64
 -17 -1 -2 1.7 0.71
 -17 2 -2 1.59 0.57
 -17 -2 2 2.4 0.8
 -17 -2 -2 2.29 0.79
 -17 2 2 2.76 0.7
 -17 -2 -2 2.16 0.71
 -17 3 -2 1.67 0.59
 -17 3 -2 2.38 0.61
 -17 -3 -2 1.31 0.76
 -17 -4 2 1.23 0.86
 -17 4 -2 0.87 0.56
 -17 -4 2 1.2 0.72
 -17 4 2 1.77 0.47
 -17 -4 -2 1.69 0.88
 -17 -4 -2 2.87 0.8
 -17 4 2 1.57 0.61
 -17 -5 2 0.67 0.63
 -17 -5 2 -0.06 0.87
 17 5 2 -1.2 0.89
 -17 -5 2 0.99 0.77
 -17 5 2 -0.15 0.47
 -17 -5 -2 1.56 0.91
 -17 -5 -2 -0.87 0.8
 -17 5 2 0.31 0.56
 17 5 -2 -0.13 0.56
 17 5 -2 0.08 0.58
 17 5 -2 0.03 0.69
 17 6 2 1.5 0.62
 -17 -6 2 1.92 0.66
 -17 -6 2 2.22 0.87
 17 6 2 1.48 0.82
 17 6 2 1.89 0.6
 17 6 -2 2.66 0.78
 -17 -6 -2 2.53 0.92
 -17 6 2 0.84 0.48
 -17 6 2 1.29 0.49
 -17 -6 -2 0.86 0.56
 17 6 -2 2.48 0.67
 -17 -6 -2 2.25 0.63
 -17 -6 -2 1.5 0.9
 -17 -7 2 0.14 1.03
 -17 -7 2 0.28 0.75
 17 7 2 0.95 0.69
 -17 7 -2 0.78 0.58
 -17 -7 2 -0.75 1.49
 17 7 2 1.02 0.9
 -17 -7 2 -0.15 0.68
 -17 -7 -2 1.22 0.97
 -17 -7 -2 -0.18 0.91
 17 7 -2 0.86 0.71
 17 7 -2 1.38 0.79
 -17 -7 -2 0.21 0.73
 -17 7 2 1.02 0.5
 17 7 -2 1.24 0.78
 17 8 2 -0.66 0.72
 -17 -8 2 0.77 0.82
 -17 -8 2 -1.04 0.75
 -17 -8 2 2.43 1
 17 8 2 0.1 0.91
 -17 -8 2 1.21 1.04
 17 8 2 0.45 0.8
 17 8 -2 0.3 0.79
 -17 -8 -2 1.01 1.03
 -17 8 2 0.1 0.54
 -17 -8 -2 0.27 0.76
 17 8 -2 0.58 0.83
 -17 -8 -2 1.29 1.06
 17 8 -2 1.01 0.85
 -17 -8 -2 0.73 0.79
 -17 -9 2 -0.1 0.82
 -17 -9 2 1.6 1.12
 17 9 2 0.12 0.89
 17 9 2 1.64 0.85
 -17 -9 -2 0.56 0.87
 -17 -9 -2 1.28 1.1
 17 9 -2 -0.09 0.96
 -17 9 2 -0.38 0.63
 -17 9 2 -0.63 0.69
 -17 -9 -2 0.48 0.8
 17 9 -2 -1.02 0.88
 17 9 -2 -0.33 0.91
 -17 -10 2 2.35 1.01
 17 10 2 4.09 1.14
 -17 -10 2 4.81 1
 -17 10 -2 2.09 0.94
 17 -10 -2 4.28 0.77
 -17 -10 2 2.97 1.19
 -17 -10 2 1.85 1.24
 17 10 2 4.33 0.98
 17 10 2 3.03 1.06
 -17 10 2 4.08 0.82
 17 10 -2 3.18 1.01
 -17 -10 -2 4.11 1.24
 -17 -10 -2 2.67 0.98
 17 10 -2 3.94 1.11
 -17 10 2 4.76 0.74
 -17 -10 -2 5.24 1.22
 17 10 -2 2.19 1.05
 -18 0 -2 6.42 0.72
 -18 0 2 6.34 0.82
 -18 0 2 7.5 0.64
 -18 0 -2 6.62 0.82
 -18 1 -2 17.96 1.17
 -18 -1 2 21.16 1.7
 -18 -1 2 19.48 1.11
 -18 1 -2 19.22 1.47
 -18 -1 -2 17.04 1.53
 -18 -1 -2 20.25 1.26
 -18 1 2 17.98 1.49
 -18 -2 2 1.43 0.67
 -18 -2 2 0.77 0.82
 -18 2 -2 0.53 0.64
 -18 2 2 0.82 0.71
 -18 -2 -2 0.79 0.84
 -18 -3 2 4.09 0.73
 -18 3 -2 4.06 0.66
 -18 3 -2 3 0.7
 -18 -3 -2 3.21 0.85
 -18 3 2 2.28 0.7
 -18 -3 -2 4.03 0.79
 -18 -4 2 2.63 0.94
 -18 4 -2 1.68 0.63
 -18 4 2 1.68 0.51
 -18 4 2 0.86 0.64
 -18 -4 -2 2.3 0.91
 -18 5 -2 3.45 0.63
 -18 -5 2 3.92 0.64
 -18 -5 2 5.36 0.85
 -18 5 2 3.6 0.53
 18 5 -2 4.04 0.77
 -18 5 2 2.59 0.63
 -18 -6 2 2.77 0.72
 -18 6 -2 3.18 0.62
 18 6 2 3.12 0.86
 18 6 -2 3.94 0.99
 18 6 -2 2.74 0.69
 -18 6 2 2.32 0.55
 -18 -6 -2 4.78 0.99
 -18 -7 2 5.22 0.83
 -18 -7 2 8.03 1.06
 18 7 2 6.45 0.75
 -18 -7 2 8.23 0.8
 -18 -7 2 4.09 1.18
 18 7 2 6.27 1.01
 18 7 2 6.61 0.74
 18 7 -2 4.6 0.91
 -18 -7 -2 6.4 1.11
 -18 7 2 6.91 0.6
 -18 7 2 7.01 0.68
 -18 -7 -2 7.27 0.79
 18 7 -2 6.61 0.82
 -18 -8 2 0.12 0.75
 18 8 2 1.18 0.96
 18 8 2 -0.51 0.73
 -18 8 -2 1.32 0.68
 -18 -8 2 -0.5 1.11
 -18 -8 2 -0.73 0.98
 -18 -8 2 -0.6 0.81
 -18 8 2 0.2 0.54
 -18 8 2 -1.37 0.64
 18 8 -2 1.3 0.78
 -18 -8 -2 -1.61 1.07
 -18 -8 -2 0.33 0.83
 -18 -8 -2 -0.36 0.71
 -18 -9 2 1.49 0.96
 18 9 2 2 0.96
 -18 -9 2 1.49 0.92
 18 9 2 2.28 0.85
 18 9 2 0.79 1.03
 -18 9 2 2.64 0.61
 -18 -9 -2 4.05 1.24
 -18 -9 -2 3.07 0.91
 -18 -9 -2 1.75 0.88
 18 9 -2 4.45 1.04
 18 9 -2 3.07 1.03
 -18 -9 -2 2.8 1.18
 -19 0 2 -0.82 0.71
 -19 0 -2 0.63 0.66
 -19 -1 2 2.42 0.85
 -19 1 -2 0.25 0.63
 -19 -1 -2 1.56 0.79
 -19 1 2 1.21 0.55
 -19 1 2 1.42 0.74
 -19 -1 -2 0.75 0.72
 -19 -2 2 1.19 0.66
 -19 -2 2 0.14 0.87
 -19 2 2 0.65 1.26
 -19 -2 -2 0.67 0.7
 -19 3 -2 1.21 0.61
 -19 3 -2 0.15 0.7
 -19 -3 2 1.67 0.92
 -19 -3 -2 2.91 0.92
 -19 3 2 1.53 0.56
 -19 4 -2 0.01 0.6
 -19 -4 2 -0.33 0.96
 -19 -4 2 0.71 0.78
 -19 4 -2 -0.97 0.64
 -19 -4 -2 -1.21 0.95
 -19 5 -2 -0.05 0.61
 -19 5 -2 -0.57 0.63
 -19 -5 2 0.62 0.87
 -19 -5 2 1.56 1
 -19 -5 -2 1.2 1.02
 -19 5 2 0.56 0.54
 -19 6 -2 1.19 0.66
 -19 -6 2 1.77 0.61
 -19 -6 2 1.25 1.1
 -19 6 2 1.16 0.53
 -19 -6 -2 -0.56 0.89
 -19 -6 -2 0.96 1.04
 19 6 -2 1.34 0.87
 -19 -7 2 -0.07 0.74
 -19 -7 2 1.79 0.79
 -19 -7 2 -0.86 0.97
 -19 -7 2 2.61 1.15
 -19 7 -2 0.65 0.67
 19 7 2 1.34 0.97
 -19 7 2 0.88 0.56
 19 7 -2 -0.15 0.92
 -19 -7 -2 0.75 1.04
 19 7 -2 0.31 0.71
 19 7 -2 0.9 0.61
 -20 0 -2 1.83 0.7
 -20 0 2 0.94 0.85
 -20 0 -2 0.68 0.78
 -20 1 -2 9.9 0.95
 -20 1 -2 8.43 0.8
 -20 -1 2 7.9 0.76
 -20 -1 2 9.62 1.03
 -20 1 2 7.01 0.67
 -20 -1 -2 6.92 0.82
 -20 -1 -2 9.14 0.97
 -20 1 2 7.85 0.96
 -20 2 -2 -0.95 0.66
 -20 -2 2 -1.09 0.71
 -20 2 -2 0.68 1.16
 -20 2 2 0.4 0.56
 -20 -2 -2 1.55 0.77
 -20 3 -2 1.03 0.66
 -20 -3 2 0.71 0.76
 -20 -3 2 0.33 0.99
 -20 4 -2 -1.23 0.63
 -20 -4 2 -0.09 1.01
 -20 -4 -2 -0.75 1.04
 -20 -5 2 2.81 1.14
 -20 -5 2 2.19 0.94
 -20 5 -2 0.24 0.71
 -20 5 -2 1.02 0.65
 -20 5 2 0.33 0.67
 -20 5 2 1.37 0.57
 -20 -5 -2 2.77 1.15
 -20 -5 -2 3.04 0.99
 -20 -6 2 3.46 1.13
 -20 6 -2 2.71 0.72
 -20 -6 2 3.77 1.01
 -20 6 2 3.02 0.59
 -20 -6 -2 0.97 1.17
 -21 0 2 0.12 0.6
 -21 0 2 0.92 0.95
 -21 0 -2 0.84 0.88
 -21 1 -2 1.91 0.78
 -21 -1 -2 2.12 0.89
 -21 1 2 2.42 0.92
 -21 -1 -2 1.19 0.79
 -21 1 2 0.92 0.62
 -21 -2 2 3 1.02
 -21 -2 2 0.91 0.75
 -21 -3 2 0.22 1.08
 -21 -3 -2 3.48 0.92
 -21 3 2 2.12 0.6
 -21 -3 -2 1.69 1.08
 0 0 3 0.38 0.24
 0 0 3 0.13 0.18
 0 0 -3 0.03 0.19
 0 -1 -3 -0.3 0.26
 0 -1 -3 -0.25 0.21
 0 1 3 -0.31 0.26
 0 -1 3 -0.07 0.26
 0 1 -3 -0.37 0.28
 0 1 -3 -0.17 0.26
 0 1 3 -0.42 0.2
 0 -1 -3 -0.33 0.25
 0 1 3 -0.32 0.27
 0 -1 3 -0.66 0.25
 0 1 -3 0.05 0.19
 0 -2 -3 970.71 23.6
 0 2 -3 970.59 23.55
 0 2 3 967.38 23.6
 0 -2 -3 975.96 23.61
 0 2 -3 964.53 23.56
 0 -2 3 969 23.6
 0 -2 3 978.52 23.56
 0 -2 3 990.92 23.56
 0 2 3 1000 23.63
 0 2 3 968.66 23.61
 0 2 -3 982.05 23.64
 0 3 -3 -0.03 0.46
 0 3 3 -0.57 0.46
 0 -3 3 0.2 0.29
 0 3 -3 0.44 0.28
 0 -3 3 -0.36 0.45
 0 -3 -3 -0.55 0.49
 0 -3 3 -0.18 0.46
 0 -3 -3 -0.52 0.5
 0 3 -3 -0.22 0.47
 0 3 3 -0.4 0.5
 0 -3 -3 0.4 0.38
 0 -4 3 93.13 2.55
 0 4 3 102.93 2.57
 0 -4 3 95.79 2.55
 0 4 -3 97.3 2.56
 0 4 3 99.55 2.57
 0 -4 3 99.89 2.48
 0 4 -3 91.89 2.47
 0 -4 -3 97.37 2.56
 0 -4 -3 100.3 2.53
 0 4 -3 94.1 2.55
 0 5 -3 -0.51 0.49
 0 5 3 -0.63 0.43
 0 -5 -3 0.56 0.46
 0 -5 -3 0.06 0.44
 0 5 -3 0.62 0.53
 0 5 -3 0.85 0.44
 0 -5 -3 0.05 0.51
 0 -5 3 0.1 0.48
 0 5 3 -0.39 0.5
 0 5 3 -0.4 0.53
 0 -5 3 0.48 0.33
 0 -5 3 -0.17 0.46
 0 7 3 -0.53 0.49
 0 7 3 0.13 0.62
 0 7 -3 -1.05 0.54
 0 7 -3 0.58 0.61
 0 -7 3 -0.22 0.57
 0 -7 -3 -0.97 0.63
 0 -7 3 -0.5 0.66
 0 -7 -3 0.8 0.61
 0 7 -3 0.23 0.62
 0 -7 3 0.01 0.37
 0 -7 -3 1.08 0.53
 0 -8 3 3.32 0.64
 0 8 -3 3.74 0.62
 0 -8 -3 2.56 0.67
 0 8 -3 3.84 0.66
 0 -8 -3 3.34 0.61
 0 -8 3 1.85 0.43
 0 8 -3 2.49 0.68
 0 -8 3 3.96 0.73
 0 8 3 2.37 0.71
 0 -8 -3 1.61 0.62
 0 8 3 2.86 0.61
 0 8 3 1.97 0.64
 0 9 -3 0.75 0.65
 0 9 3 -0.01 0.6
 0 -9 -3 -0.6 0.65
 0 9 3 -0.26 0.69
 0 -9 -3 -0.42 0.59
 0 -9 -3 0.98 0.72
 0 -9 3 0.33 0.66
 0 -9 3 -0.57 0.72
 0 9 -3 -0.55 0.7
 0 9 3 -0.07 0.72
 0 9 -3 -0.39 0.63
 0 -10 3 62.8 2.13
 0 -10 3 63.86 2.15
 0 -10 3 65.81 1.9
 0 -10 -3 62.72 2.14
 0 10 -3 62.17 2.13
 0 10 3 61.51 2.15
 0 -10 -3 58.94 2.05
 0 10 -3 65.92 2.15
 0 -10 -3 62.25 2.13
 0 10 3 63.65 2.08
 0 10 3 62.27 2.13
 0 10 -3 64 2.08
 0 -11 3 -0.15 0.49
 0 11 -3 0.14 0.86
 0 11 3 0.34 0.85
 0 11 -3 -0.71 0.74
 0 -11 3 -0.14 0.87
 0 11 -3 -0.12 0.76
 0 -11 -3 1.42 0.89
 0 -11 -3 -0.23 0.74
 0 11 3 -0.96 0.85
 0 -11 3 -0.18 0.8
 0 11 3 -0.5 0.73
 0 -11 -3 -0.07 0.79
 0 12 3 0.7 0.94
 0 12 3 1.1 0.91
 0 -12 3 1.01 0.57
 0 -12 3 1.49 1.43
 0 -12 -3 -0.42 0.95
 0 12 3 -0.42 0.84
 0 12 -3 1.53 0.89
 0 -12 3 2.6 0.94
 0 12 -3 1.13 0.85
 0 12 -3 2.78 0.98
 0 -13 3 -0.57 1.03
 0 -13 -3 -0.08 1.02
 0 -13 -3 -1.68 0.93
 0 13 -3 -0.92 0.94
 0 13 3 2.09 0.96
 0 -13 3 0.52 0.57
 0 13 3 2.1 1.05
 0 13 -3 1.58 0.91
 0 -13 3 0.63 0.95
 0 13 -3 -0.61 1.57
 0 -14 3 15.07 1.28
 0 14 -3 14.48 1.3
 0 14 3 14.38 1.22
 0 -14 -3 14.52 1.41
 0 14 -3 14.98 1.25
 0 14 -3 14.63 1.27
 0 -14 -3 15.42 1.36
 0 14 3 17.78 1.34
 0 14 3 16.38 1.36
 0 -14 3 15.72 1.35
 0 -15 -3 -0.03 1.17
 0 -15 -3 -1.75 1.16
 0 -15 3 0.24 1.21
 0 -15 -3 0.69 0.76
 0 15 -3 -1.41 1.09
 0 15 -3 -0.58 1.15
 0 -15 3 1.33 1.17
 0 -15 3 -0.15 0.68
 0 15 3 0.13 1.15
 0 15 3 -1.63 0.98
 0 15 -3 -1.16 1.05
 0 15 3 -1.04 1.17
 0 16 -3 1.31 1.3
 0 -16 3 0.32 1.25
 0 -16 -3 0.83 1.34
 0 -16 -3 -0.18 1.24
 0 -16 3 0.49 0.76
 0 16 -3 0.43 1.31
 0 -16 -3 0.08 0.78
 0 16 3 2.5 1.29
 0 16 3 1.81 1.18
 0 17 -3 2.82 1.37
 0 -17 -3 1.77 0.94
 0 17 -3 0.98 1.27
 0 -17 3 2.06 1.47
 0 17 -3 -0.03 1.38
 0 17 3 4.29 1.41
 0 -17 -3 1.36 1.42
 0 -17 -3 2.61 1.44
 1 0 3 0.41 0.23
 1 0 -3 0.35 0.2
 -1 0 -3 0.2 0.2
 -1 0 -3 0.33 0.21
 1 0 3 0.6 0.23
 -1 0 3 0.31 0.21
 1 0 -3 0.76 0.26
 -1 0 3 0.04 0.23
 1 0 -3 0.17 0.23
 -1 1 -3 8.5 0.4
 1 1 3 7.42 0.49
 1 -1 -3 8.71 0.5
 -1 -1 3 7.87 0.52
 1 -1 -3 8.09 0.51
 1 -1 -3 7.36 0.38
 1 1 3 7.17 0.48
 -1 -1 3 7.11 0.52
 -1 1 -3 7.53 0.48
 -1 1 -3 7.76 0.46
 1 1 3 7.79 0.51
 1 -1 -3 7.23 0.53
 -1 -1 3 8.91 0.51
 1 1 -3 7.89 0.5
 -1 1 3 7.13 0.5
 1 -1 3 8.64 0.43
 -1 1 3 7.64 0.5
 -1 -1 -3 7.12 0.5
 1 -1 3 8.09 0.5
 -1 -1 -3 7.84 0.49
 -1 -1 -3 7.24 0.48
 1 1 -3 7.34 0.51
 1 1 -3 8.09 0.55
 -1 1 3 7.63 0.37
 1 -1 3 7.94 0.47
 1 2 3 123.39 3.24
 -1 2 -3 135.38 3.18
 -1 2 -3 132.61 3.25
 1 2 3 131.79 3.26
 -1 -2 3 131.03 3.24
 1 2 3 133.66 3.26
 -1 -2 3 129.47 3.26
 1 -2 -3 126.38 3.21
 1 -2 -3 126.14 3.25
 -1 2 -3 130.02 3.25
 1 -2 3 130.98 3.25
 -1 -2 -3 128.96 3.25
 -1 2 3 133.28 3.25
 -1 2 3 128.29 3.21
 -1 2 3 130.73 3.25
 1 2 -3 130.39 3.26
 1 2 -3 129.1 3.24
 1 2 -3 130.54 3.26
 -1 -2 -3 136.41 3.26
 1 -2 3 126.98 3.25
 -1 -2 -3 130.26 3.24
 -1 -3 3 2.56 0.49
 -1 3 -3 2.15 0.46
 1 3 3 2.19 0.51
 -1 3 -3 2.03 0.45
 -1 3 -3 2.12 0.26
 1 -3 -3 2.73 0.37
 1 3 3 2.23 0.48
 1 3 3 2.72 0.42
 1 -3 -3 2.8 0.49
 -1 -3 3 2.05 0.36
 -1 -3 3 2.28 0.46
 1 -3 -3 2.32 0.43
 -1 3 3 1.87 0.5
 1 3 -3 2.07 0.41
 1 -3 3 2.27 0.46
 -1 -3 -3 2.79 0.41
 1 3 -3 2.8 0.5
 1 -3 3 2.44 0.46
 -1 -3 -3 1.6 0.43
 -1 3 3 2.33 0.48
 1 -3 3 2.24 0.25
 -1 3 3 2.42 0.37
 -1 -3 -3 2.57 0.48
 1 -4 -3 33.69 1.08
 -1 4 -3 33.24 1.16
 -1 -4 3 32.47 1.16
 -1 -4 3 32.16 1.08
 -1 -4 3 30.47 1.14
 1 4 3 32.92 1.19
 1 -4 -3 32.39 1.14
 1 4 3 33.96 1.17
 -1 4 -3 31.94 1.14
 1 4 3 31.54 1.1
 -1 4 3 30.87 1.07
 -1 4 3 32.74 1.17
 -1 4 3 33.57 1.16
 -1 -4 -3 32.08 1.16
 1 -4 3 32.04 0.94
 1 4 -3 30.7 1.17
 -1 -4 -3 32.03 1.15
 1 4 -3 31.95 1.07
 1 4 -3 31.77 1.13
 1 -4 3 32.44 1.14
 1 4 -3 31.01 1.15
 -1 -4 -3 32.89 1.1
 1 -4 3 31.03 1.13
 -1 -5 3 9.94 0.75
 1 5 3 9.81 0.67
 -1 5 -3 9.87 0.83
 -1 -5 3 10.24 0.69
 -1 -5 3 9.73 0.66
 1 -5 -3 9.26 0.75
 1 -5 -3 10.92 0.66
 1 5 3 11.35 0.72
 1 5 3 11.24 0.81
 1 -5 -3 10.31 0.69
 -1 -5 -3 10.51 0.88
 -1 5 3 10.19 0.75
 -1 -5 -3 9.77 0.59
 -1 5 3 9.2 0.65
 1 5 -3 9.8 0.86
 1 -5 3 10.5 0.69
 -1 -5 -3 9.45 0.6
 -1 5 3 10.27 0.92
 1 -5 3 9.62 0.86
 1 5 -3 10.43 0.64
 1 5 -3 10.33 0.68
 1 -6 -3 18.47 0.97
 -1 -6 3 17.45 0.92
 -1 -6 3 19.67 1.09
 -1 6 -3 18.59 1.08
 -1 6 -3 20.67 1.1
 1 6 3 19.8 1.08
 1 -6 -3 19.16 1.08
 -1 6 -3 21.28 1.05
 -1 -6 3 21.27 1.11
 1 6 3 20.56 1.14
 -1 -6 -3 19.83 1.09
 -1 -6 -3 18.16 1.07
 1 6 -3 18.25 1.05
 -1 -6 -3 20.47 1.03
 -1 6 3 20.69 1.13
 1 -6 3 17.85 0.8
 -1 6 3 20.45 1.1
 1 6 -3 18.84 1.08
 1 -6 3 19.43 1.07
 -1 7 -3 23.01 1.17
 -1 -7 3 24.8 1.2
 1 7 3 21.87 1.22
 1 -7 -3 21.95 1.19
 1 7 3 22.03 1.13
 -1 7 -3 24.39 1.19
 -1 -7 3 20.99 1.01
 1 -7 -3 21.96 1.07
 1 -7 -3 22.7 1.19
 1 7 3 21.92 1.21
 -1 7 -3 22.31 1.12
 -1 -7 3 23.16 1.2
 1 -7 3 23.88 1.18
 1 7 -3 21.69 1.23
 1 7 -3 21.62 1.14
 -1 -7 -3 23.02 1.21
 1 7 -3 23.16 1.18
 -1 -7 -3 22.69 1.12
 1 -7 3 20.9 0.89
 1 -7 3 25.04 1.2
 -1 7 3 23 1.22
 -1 7 3 21.69 1.07
 1 -8 -3 21.55 1.24
 1 8 3 25.21 1.31
 -1 -8 3 23.41 1.07
 -1 8 -3 21.57 1.2
 -1 -8 3 26.01 1.28
 -1 8 -3 23.91 1.25
 1 -8 -3 26.11 1.28
 1 -8 -3 25.1 1.16
 -1 8 -3 26.17 1.25
 -1 -8 3 21.99 1.26
 1 8 3 22.71 1.25
 -1 8 3 21.67 1.31
 1 8 -3 26.04 1.29
 1 8 -3 24.72 1.3
 1 -8 3 22.9 0.96
 -1 8 3 23.9 1.27
 -1 -8 -3 23.99 1.19
 -1 -8 -3 21.31 1.26
 -1 -8 -3 24 1.29
 1 8 -3 24.27 1.22
 1 -8 3 26.21 1.26
 -1 8 3 26.27 1.18
 1 -8 3 24.63 1.26
 1 9 3 15.53 1.29
 -1 -9 3 15.21 1.25
 -1 9 -3 15.3 1.21
 1 -9 -3 18.63 1.25
 1 9 3 14.76 1.24
 -1 9 -3 16.75 1.24
 1 -9 -3 15.67 1.22
 -1 9 -3 16.29 1.17
 -1 -9 3 18.07 1.01
 1 9 3 16.9 1.17
 1 -9 -3 16.8 1.14
 -1 -9 3 17.67 1.25
 1 9 -3 16.75 1.25
 -1 9 3 16.79 1.23
 1 9 -3 16.61 1.25
 1 -9 3 18.27 1.25
 1 -9 3 16.09 0.89
 -1 9 3 15.49 1.13
 1 -9 3 13.95 1.25
 -1 -9 -3 18.37 1.23
 -1 9 3 17.41 1.28
 -1 -9 -3 15.45 1.25
 -1 -9 -3 18.46 1.15
 1 9 -3 16.32 1.15
 -1 -10 3 3.61 0.55
 -1 10 -3 5.68 0.78
 -1 -10 3 5.1 0.77
 1 -10 -3 4.86 0.74
 1 -10 -3 5.29 0.87
 1 10 3 5.7 0.83
 -1 10 -3 4.38 0.78
 1 -10 -3 3.64 0.77
 -1 10 -3 3.2 0.75
 1 10 3 4.29 0.75
 -1 -10 3 4.7 0.77
 1 -10 3 3.33 0.49
 -1 10 3 3.51 0.68
 -1 -10 -3 4.06 0.72
 1 -10 3 4.48 0.79
 1 10 -3 4.14 0.84
 -1 -10 -3 4.68 0.79
 -1 -10 -3 3.7 0.89
 1 10 -3 4.85 0.81
 -1 10 3 4.84 0.83
 -1 10 3 5.07 0.83
 1 10 -3 3.03 0.74
 1 -10 3 2.98 0.74
 1 11 3 1.46 0.9
 -1 11 -3 1.77 0.82
 1 11 3 2.65 0.79
 1 -11 -3 1.66 0.91
 -1 -11 3 2.59 0.58
 1 11 3 0.79 0.86
 -1 11 -3 2.87 0.8
 1 -11 -3 1.64 0.84
 -1 -11 3 -0.22 0.8
 -1 11 -3 2.84 0.88
 -1 -11 3 3.17 0.82
 1 11 -3 1.03 0.86
 1 -11 3 1.68 0.5
 1 -11 3 0.33 0.85
 1 11 -3 1.67 0.78
 -1 -11 -3 0.27 0.76
 1 -11 3 1.48 0.81
 -1 -11 -3 1.25 0.85
 -1 11 3 1.42 0.85
 1 11 -3 0.95 0.82
 -1 11 3 3.01 0.86
 -1 12 -3 3.68 0.94
 1 -12 -3 2.57 0.98
 1 12 3 2.79 1
 -1 -12 3 4.2 1.1
 -1 12 -3 2.15 1.3
 -1 12 -3 1.05 0.95
 1 12 3 2.31 0.96
 1 12 3 2.07 1.37
 -1 -12 3 0.71 0.95
 -1 -12 3 1.85 0.6
 1 12 -3 2.63 0.85
 1 -12 3 2.39 0.94
 -1 12 3 3.02 0.96
 -1 12 3 2.77 0.95
 1 12 -3 2.81 0.92
 1 -12 3 2.05 0.97
 -1 -12 -3 1.75 0.89
 1 12 -3 2.38 0.92
 1 -12 3 2.18 0.55
 -1 12 3 0.99 0.78
 1 -13 -3 13.86 1.17
 -1 -13 3 12.89 1.12
 -1 -13 3 12.53 1.23
 -1 13 -3 11.76 1.08
 1 -13 -3 13.99 1.23
 -1 13 -3 12.77 1.22
 1 13 3 11.75 1.25
 1 13 3 12.25 1.19
 -1 -13 3 15.62 1.29
 1 13 3 12.24 1.07
 -1 13 -3 14.78 1.2
 1 13 -3 12.51 1.2
 -1 -13 -3 11.72 1.73
 1 -13 3 13.98 1.25
 -1 13 3 11.38 1.18
 1 -13 3 14.86 1.17
 1 13 -3 12.71 1.14
 -1 -13 -3 14.51 1.24
 1 13 -3 15.45 1.16
 -1 13 3 12.94 1.11
 -1 13 3 13.61 1.77
 1 14 3 0.74 1.14
 1 14 3 -0.47 1.07
 1 -14 -3 1.52 1.1
 -1 -14 3 2.08 0.98
 -1 -14 3 1.79 1.07
 -1 14 -3 3.57 1.06
 -1 14 -3 0.89 0.93
 -1 -14 3 3.02 0.71
 1 -14 -3 2.19 1.07
 -1 14 -3 0.22 1.08
 1 -14 3 2.72 1.11
 -1 14 3 3.7 1.17
 1 14 -3 -0.1 0.95
 -1 14 3 1.42 1.11
 -1 14 3 2.22 1
 1 14 -3 3.8 1.08
 1 14 -3 -0.21 1.06
 1 -14 3 0.17 1.31
 1 -14 3 1.31 0.6
 -1 -14 -3 2.53 1.07
 -1 -14 -3 1.87 1.19
 -1 -15 3 0.87 1.2
 -1 15 -3 -0.41 1.15
 -1 15 -3 -1.45 1.12
 1 -15 -3 0.59 1.16
 -1 15 -3 1.69 1.07
 1 -15 -3 -0.28 1.12
 -1 -15 3 1.09 0.73
 1 15 3 -2.02 1.15
 1 15 3 1.84 1.04
 1 -15 -3 0.74 0.72
 1 -15 3 -0.83 0.99
 1 -15 3 -0.76 0.65
 -1 15 3 -1.11 1.11
 1 15 -3 1.06 1.13
 -1 -15 -3 0.52 1.14
 -1 -15 -3 2.33 1.16
 -1 15 3 -0.09 1.2
 1 15 -3 -0.53 0.97
 -1 15 3 -0.98 1.09
 1 15 -3 -0.24 1.12
 1 -15 3 -0.42 1.15
 -1 -15 -3 -0.94 0.76
 1 -16 -3 -0.73 0.77
 1 -16 -3 0.22 1.25
 1 16 3 0.49 1.31
 1 16 3 2.51 1.39
 -1 -16 3 0.94 1.34
 -1 16 -3 1.9 1.25
 -1 16 -3 -1.61 1.08
 -1 16 -3 -1.39 1.24
 -1 -16 3 -0.53 0.79
 -1 -16 3 -0.12 1.31
 1 -16 -3 1.28 1.3
 -1 16 3 0.85 1.34
 1 -16 3 1.5 1.31
 -1 16 3 -1.59 1.12
 1 16 -3 -0.7 1.16
 1 16 -3 0.7 1.29
 -1 -16 -3 -2.61 1.26
 1 -16 3 -0.44 0.7
 1 16 -3 1.94 1.16
 -1 -16 -3 -0.37 1.27
 -1 -16 -3 -1.49 0.96
 -1 16 3 -0.67 1.18
 1 -17 -3 2.76 1.47
 -1 17 -3 -1.36 1.39
 1 17 3 -1.27 1.27
 -1 17 -3 -0.67 1.43
 -1 -17 3 0.85 0.85
 -1 -17 3 -1.05 1.17
 1 -17 -3 0.46 0.84
 1 17 3 0.05 1.41
 -1 -17 -3 -0.66 1.33
 -1 17 3 -2.21 1.45
 -1 -17 -3 2.11 1.4
 1 -17 3 -0.62 0.69
 1 17 -3 -2.7 1.35
 1 17 -3 1.84 1.25
 1 -17 3 -0.64 1.44
 -1 17 3 2.63 1.47
 2 0 3 0.25 0.26
 2 0 -3 0.55 0.29
 -2 0 3 0.45 0.27
 -2 0 3 -0.17 0.29
 2 0 -3 0.03 0.27
 -2 0 3 0.11 0.25
 2 0 -3 0.2 0.26
 -2 0 -3 0.16 0.23
 2 0 3 -0.02 0.26
 -2 0 -3 -0.17 0.23
 2 1 3 249.87 6.12
 2 1 3 250.02 6.12
 2 -1 -3 254.09 6.13
 -2 -1 3 259.46 6.16
 -2 -1 3 246.25 6.14
 -2 -1 3 253.4 6.14
 -2 1 -3 248.69 6.11
 2 -1 -3 246.99 6.13
 2 -1 -3 248.87 6.08
 -2 1 -3 246.71 6.11
 2 -1 -3 250.98 6.13
 2 1 3 257.05 6.14
 2 -1 3 257.6 6.12
 2 1 -3 257.89 6.14
 -2 1 3 249.78 6.13
 2 1 -3 254.92 6.15
 2 -1 3 246.84 6.11
 -2 -1 -3 249.38 6.12
 -2 -1 -3 251.2 6.12
 -2 1 3 254.34 6.13
 2 1 -3 257.82 6.14
 -2 1 3 248.88 6.13
 -2 1 3 253.32 6.08
 -2 -1 -3 265.01 6.15
 2 -2 -3 78.6 2.08
 -2 -2 3 83.29 2.11
 -2 -2 3 79.4 2.09
 2 -2 -3 83.03 2
 -2 2 -3 80.35 1.96
 -2 2 -3 80.27 2.05
 2 2 3 80.16 2.08
 -2 -2 3 76.64 2.09
 -2 2 -3 78.46 2.06
 2 -2 -3 75.56 2.07
 2 2 3 76.99 2.08
 2 2 3 81.02 2.08
 2 2 -3 81.84 2.09
 -2 2 3 75.81 2.07
 -2 -2 -3 80.42 2.08
 2 2 -3 80.32 2.09
 -2 -2 -3 77.44 2.07
 -2 2 3 83.14 1.99
 2 -2 3 79.37 2.05
 -2 2 3 77.87 2.07
 2 2 -3 77.46 2.09
 -2 -2 -3 81.17 2.08
 2 -2 3 81.09 2.06
 2 2 -3 80.88 2.05
 -2 2 3 75.2 2.04
 2 3 3 32.51 1.14
 -2 3 -3 33.29 1.11
 -2 -3 3 35.47 1.15
 -2 -3 3 33.56 1.17
 2 3 3 34.28 1.12
 -2 3 -3 36.11 1.12
 2 -3 -3 34.69 1.04
 2 3 3 34.98 1.16
 2 -3 -3 34.05 1.14
 -2 -3 3 34.31 1.16
 2 -3 -3 34.19 1.06
 2 -3 -3 33.63 1.13
 -2 3 3 32.32 1.14
 2 -3 3 33.02 1.11
 -2 -3 -3 34.61 1.15
 -2 3 3 33.76 1.16
 -2 -3 -3 34.61 1.13
 2 3 -3 33.25 1.15
 2 3 -3 33.69 1.16
 2 -3 3 34.44 1.11
 2 3 -3 35.61 1.12
 2 3 -3 36.15 1.13
 -2 -3 -3 32.94 1.14
 -2 3 3 36.06 1.04
 2 -4 -3 191.56 4.79
 -2 -4 3 188.81 4.8
 2 -4 -3 195.48 4.75
 2 4 3 192.46 4.79
 2 -4 -3 193.6 4.78
 -2 -4 3 191.62 4.8
 2 4 3 185.78 4.79
 2 4 3 195.3 4.79
 -2 4 -3 189.1 4.77
 -2 -4 3 199.16 4.79
 -2 4 -3 183.32 4.77
 -2 -4 -3 198.81 4.79
 2 4 -3 199.65 4.8
 2 4 -3 201.96 4.79
 -2 4 3 193.74 4.75
 -2 -4 -3 187.19 4.79
 2 -4 3 189.43 4.78
 -2 -4 -3 194.1 4.79
 2 -4 3 189.04 4.78
 -2 4 3 197.17 4.79
 2 4 -3 186.81 4.79
 2 4 -3 191.81 4.8
 2 5 3 4.49 0.49
 -2 -5 3 4.29 0.51
 2 -5 -3 5.15 0.62
 -2 -5 3 5.51 0.64
 -2 -5 3 4.78 0.45
 -2 5 -3 5.2 0.56
 2 5 3 5.63 0.6
 2 -5 -3 5.12 0.54
 2 -5 -3 5.05 0.47
 2 5 3 5.63 0.61
 -2 -5 -3 5.78 0.6
 2 5 -3 5.77 0.64
 2 5 -3 5.29 0.59
 -2 5 3 4.89 0.55
 -2 5 3 5.51 0.6
 -2 -5 -3 6.28 0.58
 2 5 -3 5.61 0.55
 2 -5 3 5.1 0.55
 -2 5 3 4.87 0.48
 2 -5 3 5.42 0.52
 2 -5 3 4.92 0.45
 -2 -5 -3 4.79 0.5
 -2 -6 3 21.45 1.13
 2 6 3 21.21 1.05
 2 6 3 20.76 1.12
 -2 -6 3 21.38 1.02
 2 -6 -3 22.56 1.01
 -2 6 -3 20.69 1.09
 -2 6 -3 21.61 1.09
 2 -6 -3 22.49 1.09
 2 6 3 20.58 1.18
 2 -6 -3 20.93 1.1
 -2 -6 -3 23.86 1.07
 2 -6 3 22.14 1.12
 2 -6 3 19.99 0.77
 -2 -6 -3 21.11 1.13
 2 6 -3 23.34 1.12
 -2 6 3 21.86 1.14
 2 -6 3 20.85 1.11
 -2 6 3 20.94 0.98
 -2 -6 -3 20.62 1.11
 -2 6 3 21.55 1.13
 2 6 -3 21.36 1.07
 -2 7 -3 18.62 1.11
 -2 7 -3 17.17 1.11
 2 -7 -3 19.67 1.06
 2 -7 -3 16.13 1.12
 2 7 3 19.3 1.06
 2 7 3 15.55 1.2
 2 -7 -3 17.37 1.13
 -2 7 -3 19.41 1.09
 2 7 3 18.01 1.14
 -2 -7 3 19.48 1.14
 2 7 -3 15.46 1.16
 2 7 -3 17.88 1.08
 -2 7 3 19.04 1.04
 -2 -7 -3 16.93 1.14
 -2 -7 -3 16.41 1.16
 2 -7 3 19.17 1.12
 -2 -7 -3 19.45 1.06
 2 -7 3 19.01 1.1
 -2 7 3 16.99 1.12
 2 7 -3 19.5 1.13
 -2 7 3 17.05 1.13
 2 -8 -3 68.62 2.14
 2 -8 -3 72.47 2.15
 -2 8 -3 72.43 2.14
 -2 -8 3 73.27 2.07
 2 8 3 69.75 2.16
 -2 -8 3 70.28 2.17
 2 8 3 71.27 2.13
 2 -8 -3 71.09 2.1
 2 8 3 71.94 2.19
 -2 8 -3 66.79 2.14
 -2 -8 3 71.54 2.17
 -2 8 -3 71 2.12
 2 -8 3 72.18 1.9
 -2 8 3 69.35 2.07
 -2 8 3 71.95 2.16
 -2 -8 -3 68.62 2.16
 2 8 -3 73.09 2.16
 2 -8 3 67.3 2.14
 -2 -8 -3 70.73 2.17
 -2 -8 -3 71.75 2.14
 2 8 -3 70.32 2.13
 2 -8 3 71.54 2.16
 2 8 -3 69.08 2.18
 -2 8 3 71.8 2.16
 2 9 3 45.82 1.72
 -2 9 -3 42.66 1.63
 2 -9 -3 44.12 1.69
 2 9 3 43.81 1.65
 -2 -9 3 44.16 1.69
 -2 9 -3 42.51 1.63
 2 -9 -3 43.62 1.66
 -2 -9 3 42.61 1.51
 2 9 3 45.25 1.69
 2 9 -3 44.54 1.72
 2 -9 3 43.67 1.68
 -2 -9 -3 44.38 1.7
 -2 -9 -3 42.21 1.7
 2 9 -3 45.72 1.66
 2 -9 3 42.18 1.34
 2 -9 3 45.21 1.66
 -2 9 3 45.53 1.69
 -2 -9 -3 43.35 1.61
 -2 9 3 44.62 1.66
 2 9 -3 44.65 1.68
 -2 9 3 43.62 1.57
 -2 10 -3 2.88 0.76
 2 10 3 1.17 0.71
 2 10 3 1.67 0.8
 2 -10 -3 1.23 0.73
 -2 10 -3 2.43 0.71
 -2 -10 3 1.71 0.84
 2 -10 -3 0.59 0.82
 2 10 3 0.23 0.74
 -2 -10 3 1.27 0.54
 -2 -10 3 2.81 0.83
 -2 10 -3 1.89 0.77
 -2 10 3 1.62 0.75
 2 10 -3 1.16 0.66
 2 10 -3 3.07 0.84
 -2 -10 -3 1.08 0.82
 -2 -10 -3 -0.24 0.77
 2 -10 3 1.34 0.41
 2 -10 3 0.92 0.77
 2 10 -3 0.86 0.81
 2 -10 3 1.24 0.8
 -2 -10 -3 2.06 0.67
 -2 10 3 0.67 0.76
 2 11 3 8.23 1.05
 2 -11 -3 8.03 0.96
 -2 -11 3 6.73 0.96
 -2 -11 3 9.24 1.05
 2 11 3 7.11 0.99
 -2 11 -3 6.65 0.86
 -2 11 -3 8.15 0.85
 -2 -11 3 6.77 0.68
 2 -11 -3 6.38 1
 2 -11 3 8.14 0.98
 -2 11 3 7.16 0.81
 2 11 -3 6.42 0.89
 -2 11 3 7.93 0.93
 2 -11 3 7.2 0.56
 2 -11 3 7.17 0.93
 -2 -11 -3 6.45 0.93
 -2 11 3 6.82 0.9
 2 11 -3 7.37 0.98
 -2 -11 -3 5.48 0.86
 2 11 -3 9.19 1.02
 2 -12 -3 0.98 0.88
 -2 12 -3 2 1.3
 2 12 3 1.33 0.99
 -2 -12 3 2.9 0.95
 2 12 3 1.52 0.83
 -2 12 -3 0.13 0.96
 -2 -12 3 1.8 0.61
 -2 -12 3 1.42 0.98
 2 12 3 1.23 1.13
 -2 12 -3 0.72 1.35
 2 12 -3 1.91 0.92
 -2 12 3 0.2 0.95
 -2 -12 -3 2.28 0.99
 -2 12 3 1.63 0.91
 2 -12 3 0.1 0.91
 2 -12 3 0.51 0.49
 2 12 -3 0.75 0.88
 2 12 -3 1.54 0.78
 -2 12 3 1.88 0.8
 -2 -12 -3 -0.38 1.41
 -2 -12 -3 0.57 0.94
 2 -12 3 1.34 0.93
 2 13 3 8.04 1.11
 -2 -13 3 6.33 0.75
 2 -13 -3 5.41 1.15
 -2 -13 3 6.32 1.1
 -2 13 -3 5.42 1.05
 -2 -13 3 7.76 1.09
 -2 13 -3 7.91 1.1
 2 13 3 7.28 1.04
 -2 13 -3 7.26 0.98
 2 13 -3 4.8 1
 -2 -13 -3 6.21 1.08
 2 13 -3 5.93 1.08
 2 -13 3 5.84 1.16
 2 -13 3 6.92 1.08
 2 13 -3 7.48 1.11
 -2 -13 -3 5.51 1
 -2 13 3 4.65 0.94
 -2 -13 -3 5.37 1.07
 2 -13 3 5.64 0.59
 -2 13 3 6.89 1.11
 -2 -14 3 -2.13 1.05
 -2 14 -3 -1.21 0.91
 2 -14 -3 -0.97 1
 2 14 3 -0.41 1.09
 2 14 3 1.29 0.94
 2 -14 -3 -1.88 1.25
 2 14 3 -0.31 1.07
 -2 -14 3 0.49 0.7
 -2 14 -3 -0.05 1.1
 -2 14 -3 -0.75 1.07
 -2 -14 3 0.33 0.96
 2 -14 3 -0.28 0.55
 2 -14 3 0.76 1.07
 -2 -14 -3 -0.74 1.01
 2 -14 3 -1.87 1.08
 -2 14 3 1.42 1.11
 -2 14 3 -1.65 0.92
 -2 -14 -3 -1.19 1.08
 2 14 -3 -0.59 0.87
 2 14 -3 0.2 1.02
 -2 14 3 0.27 1.04
 2 14 -3 -1.69 0.97
 -2 -15 3 14.3 1.31
 2 -15 -3 11.84 1.35
 -2 -15 3 10.97 0.97
 -2 15 -3 11.99 1.38
 2 -15 -3 12.35 0.87
 2 -15 -3 13.9 1.37
 -2 15 -3 10.95 1.24
 2 15 3 14.32 1.31
 2 15 3 15.86 1.4
 -2 15 3 12.87 1.23
 2 -15 3 11.53 0.78
 2 15 -3 14.79 1.38
 -2 -15 -3 12.85 1.45
 2 15 -3 13.44 1.28
 -2 15 3 11.03 1.43
 -2 -15 -3 11.92 1.36
 -2 -15 -3 10.22 1.55
 -2 15 3 12.8 1.45
 2 -15 3 14.77 1.44
 -2 -16 3 -0.12 1.27
 2 -16 -3 3.51 1.41
 -2 -16 3 2.54 1.38
 2 16 3 1.65 1.33
 2 16 3 3.53 1.22
 -2 16 -3 3.98 1.32
 2 -16 -3 0.15 1.24
 2 16 3 1.64 1.14
 -2 -16 3 0.2 0.82
 -2 16 -3 3.34 1.37
 2 -16 3 1.3 1.29
 2 -16 3 1.17 0.62
 2 -16 3 2.93 1.09
 2 16 -3 0.07 1.1
 2 16 -3 -0.23 1.26
 -2 16 3 0.93 1.22
 2 16 -3 1.38 1.29
 -2 -16 -3 -0.83 1.32
 -2 -16 -3 2.06 0.87
 -2 -16 -3 3.8 1.28
 -2 -17 3 2.44 1.37
 -2 17 -3 3.51 1.43
 2 -17 -3 0.39 1.38
 2 -17 -3 3.85 1.47
 -2 -17 3 1.53 1.27
 2 -17 -3 -0.14 0.83
 2 17 3 0.06 1.44
 -2 -17 3 0.9 0.9
 2 17 3 0.75 1.38
 -2 17 -3 0.74 1.21
 2 -17 3 0.04 1.41
 -2 -17 -3 2.46 1.01
 -2 17 3 3.06 1.41
 -2 -17 -3 0.43 1.41
 2 -17 3 0.98 0.68
 2 17 -3 2.15 1.4
 2 17 -3 -0.96 1.37
 -2 17 3 0.6 1.34
 -3 0 3 -0.13 0.32
 -3 0 3 -0.04 0.33
 3 0 -3 0.28 0.18
 3 0 -3 0.28 0.34
 3 0 -3 0.11 0.34
 -3 0 3 0.15 0.33
 3 1 3 278.29 7.03
 -3 -1 3 283.45 7.05
 3 -1 -3 282.36 7.04
 -3 -1 3 284.22 7.05
 -3 1 -3 288.29 7.01
 -3 1 -3 286.16 7.01
 -3 -1 3 306.27 7.09
 3 -1 -3 286.98 7.04
 3 1 3 291.46 7.03
 3 1 3 301.07 7.07
 3 -1 -3 289.15 7.05
 -3 1 3 292.64 7.06
 -3 1 3 282.04 7.04
 3 1 -3 289.38 7.05
 3 1 -3 299.34 7.08
 3 -1 3 285.59 7.01
 -3 -1 -3 304.15 7.07
 3 1 -3 291.08 7.05
 -3 -1 -3 296.18 7.03
 -3 -1 -3 284.18 7.02
 -3 1 3 282.93 7.04
 3 1 -3 297.71 7.02
 -3 2 -3 238.4 6.01
 -3 -2 3 247.27 6.07
 3 2 3 245.42 6.03
 3 2 3 240.1 6.04
 -3 -2 3 250.02 6.04
 -3 -2 3 246.42 6.03
 3 -2 -3 253.07 6.03
 -3 -2 3 244.45 6.04
 3 2 3 246.88 6.02
 3 -2 -3 260.05 6.03
 3 2 -3 240.03 6.02
 -3 2 3 259.83 6.03
 -3 2 3 235.01 5.97
 3 -2 3 239.71 6
 -3 2 3 261.17 6.03
 3 2 -3 251.56 6.04
 -3 -2 -3 239.24 6.02
 -3 -2 -3 241.32 6.03
 3 2 -3 252.6 6.04
 3 2 -3 253.86 6.07
 3 -2 3 241.01 6
 -3 3 -3 15.8 0.76
 -3 -3 3 15.81 0.86
 -3 -3 3 14.97 0.84
 3 -3 -3 17.58 0.69
 3 -3 -3 16.85 0.66
 3 3 3 15.91 0.82
 3 -3 -3 16.97 0.8
 -3 3 -3 15.45 0.76
 3 -3 -3 16.64 0.81
 3 3 3 16.5 0.82
 3 3 3 16.17 0.82
 -3 -3 3 16.95 0.88
 3 -3 3 15.35 0.76
 3 3 -3 17.54 0.77
 3 3 -3 15.42 0.85
 -3 -3 -3 15.57 0.81
 3 3 -3 15.51 0.81
 -3 3 3 15.68 0.8
 -3 3 3 15.18 0.83
 -3 -3 -3 15.43 0.81
 3 3 -3 16.49 0.87
 -3 -3 -3 15.7 0.83
 -3 3 3 17.35 0.66
 -3 4 -3 4.55 0.51
 -3 -4 3 4.47 0.49
 -3 -4 3 4.44 0.56
 3 -4 -3 5.38 0.52
 -3 -4 3 3.64 0.43
 3 4 3 4.26 0.53
 3 -4 -3 4.66 0.41
 3 4 3 4.37 0.46
 -3 -4 3 4.83 0.56
 3 -4 -3 4.45 0.52
 3 4 3 4.38 0.53
 3 -4 -3 4.19 0.34
 -3 4 3 5.35 0.54
 -3 -4 -3 4.82 0.56
 -3 -4 -3 5.38 0.5
 3 -4 3 4.5 0.46
 3 4 -3 4.46 0.46
 -3 -4 -3 4.14 0.49
 3 -4 3 3.99 0.48
 -3 4 3 5.31 0.42
 3 4 -3 4.04 0.55
 -3 4 3 5.27 0.57
 3 4 -3 4.37 0.51
 -3 -5 3 11.34 0.71
 -3 -5 3 10.42 0.89
 -3 -5 3 10.62 0.88
 3 -5 -3 11.45 0.69
 3 -5 -3 9.78 0.87
 3 -5 -3 11.04 0.69
 -3 5 -3 11.99 0.86
 3 5 3 9.82 0.86
 -3 5 -3 9.73 0.86
 -3 -5 3 10.59 0.65
 3 -5 -3 10.86 0.74
 3 5 3 11.41 0.69
 3 5 3 9.86 0.68
 3 5 -3 9.63 0.67
 -3 5 3 9.92 0.89
 3 5 -3 11.69 0.72
 -3 -5 -3 10.51 0.68
 3 -5 3 10.2 0.84
 -3 -5 -3 11.52 0.73
 3 5 -3 9.98 0.64
 -3 5 3 11.92 0.77
 -3 5 3 9.65 0.65
 -3 -5 -3 11.38 0.85
 3 -5 3 9.73 0.86
 3 -6 -3 5.58 0.65
 3 6 3 6.2 0.67
 3 6 3 4.51 0.56
 3 -6 -3 4.84 0.57
 3 6 3 5.57 0.64
 -3 -6 3 6.33 0.6
 -3 6 -3 5 0.59
 -3 6 -3 5.68 0.61
 -3 -6 3 5.51 0.58
 -3 -6 3 4.87 0.65
 -3 6 3 5.68 0.67
 -3 -6 -3 5.21 0.58
 -3 -6 -3 4.52 0.6
 -3 6 3 4.85 0.52
 3 6 -3 6.21 0.62
 3 -6 3 5.73 0.59
 3 -6 3 6.64 0.66
 -3 7 -3 6.71 0.7
 3 7 3 6.42 0.71
 3 7 3 6.32 0.68
 3 -7 -3 5.55 0.71
 -3 7 -3 4.61 0.6
 -3 -7 3 6.8 0.74
 3 7 3 5.61 0.65
 3 -7 -3 5.72 0.65
 -3 7 -3 5.81 0.67
 -3 -7 3 6 0.74
 3 -7 3 6.91 0.66
 -3 -7 -3 5.57 0.7
 -3 7 3 5.72 0.65
 3 7 -3 6.5 0.72
 -3 7 3 6.84 0.58
 -3 -7 -3 5.4 0.68
 -3 -7 -3 5.49 0.64
 3 7 -3 6.1 0.63
 -3 7 3 5.36 0.67
 3 -7 3 5.55 0.63
 3 7 -3 5.44 0.66
 3 8 3 17.9 1.21
 -3 -8 3 14.73 1.05
 3 8 3 15.38 1.15
 3 -8 -3 15.53 1.14
 -3 8 -3 15.3 1.11
 3 -8 -3 14.9 1.14
 -3 -8 3 18.32 1.18
 -3 8 -3 16.98 1.11
 -3 -8 3 17.49 1.2
 -3 8 -3 17.38 1.13
 -3 8 3 15.36 1.16
 -3 -8 -3 15.33 1.17
 -3 8 3 14.36 1
 3 8 -3 16.7 1.18
 3 8 -3 16.41 1.15
 -3 8 3 15.69 1.16
 3 8 -3 16.38 1.1
 3 -8 3 14.03 1.13
 -3 -8 -3 15.62 1.16
 3 -8 3 15.57 1.12
 -3 -8 -3 15.79 1.13
 3 -9 -3 2.43 0.69
 3 9 3 2.2 0.76
 -3 9 -3 3.58 0.69
 3 9 3 1.38 0.75
 -3 -9 3 1.89 0.72
 -3 9 -3 2.9 0.65
 3 -9 -3 1.92 0.68
 -3 -9 3 2.8 0.67
 -3 -9 3 2.91 0.53
 3 9 3 3.62 0.67
 -3 9 -3 3.56 0.68
 3 -9 3 3 0.7
 -3 9 3 2.25 0.7
 3 -9 3 2.42 0.71
 3 9 -3 1.38 0.64
 -3 -9 -3 2.04 0.65
 3 9 -3 1.41 0.79
 3 9 -3 3.49 0.77
 -3 9 3 1.73 0.73
 -3 -9 -3 3.3 0.79
 -3 -9 -3 1.22 0.7
 -3 9 3 1.88 0.62
 -3 -10 3 7.44 0.92
 3 -10 -3 5.36 0.77
 -3 10 -3 6.01 0.81
 3 10 3 6.24 0.9
 -3 10 -3 6.57 0.8
 3 10 3 5.69 0.73
 3 10 3 6.04 0.88
 3 -10 -3 6.56 0.8
 -3 10 -3 5.49 0.74
 -3 -10 3 7.25 0.9
 3 -10 3 5.99 0.84
 -3 -10 -3 4.97 0.78
 3 -10 3 4.78 0.42
 -3 -10 -3 4.67 0.83
 3 10 -3 4.89 0.83
 -3 10 3 5.7 0.84
 3 10 -3 6.28 0.86
 -3 10 3 6.4 0.83
 3 -10 3 6.08 0.82
 3 10 -3 7.09 0.79
 -3 10 3 4.49 0.7
 3 -11 -3 0.34 0.78
 3 11 3 0.11 0.84
 -3 11 -3 0.91 0.88
 -3 -11 3 2.06 0.84
 -3 -11 3 -0.25 0.84
 3 11 3 1.82 0.9
 -3 -11 3 1.79 0.62
 3 11 3 2.44 0.79
 -3 11 -3 0.59 0.73
 3 -11 -3 2.15 0.86
 -3 -11 -3 0.22 0.87
 -3 -11 -3 1.89 0.76
 -3 11 3 1.82 0.74
 3 11 -3 0.78 0.81
 3 -11 3 1.28 0.85
 -3 11 3 1.51 0.87
 3 11 -3 1.28 0.89
 3 11 -3 0.95 0.8
 3 -11 3 2.23 0.9
 -3 11 3 0.94 0.85
 -3 12 -3 -0.6 1.05
 -3 -12 3 0.98 0.66
 -3 12 -3 1.76 0.92
 3 -12 -3 -0.29 0.92
 -3 -12 3 0.61 0.98
 3 12 3 2.93 1.02
 3 12 3 1.67 0.94
 -3 12 -3 1.49 1.46
 3 12 -3 2.35 0.99
 3 12 -3 0.42 1.41
 3 -12 3 -0.54 0.89
 -3 -12 -3 -0.49 0.91
 -3 12 3 2.21 1.38
 -3 -12 -3 2.42 0.96
 3 -12 3 1.95 0.92
 -3 -12 -3 0.39 0.94
 -3 12 3 0.53 0.95
 -3 12 3 2.2 0.82
 3 -12 3 0.77 0.44
 3 13 3 1.86 0.98
 -3 13 -3 1.78 0.99
 3 -13 -3 0.27 0.99
 -3 -13 3 -0.31 0.94
 -3 -13 3 1 1
 3 13 3 1.59 0.96
 -3 13 -3 0.5 0.95
 3 13 3 0.75 1.1
 -3 13 -3 0.52 0.88
 -3 -13 3 1.75 0.71
 -3 13 3 0.78 0.93
 -3 13 3 1.04 0.97
 -3 -13 -3 0.09 1.01
 3 -13 3 0.98 0.99
 3 -13 3 1.29 0.97
 -3 -13 -3 0.88 1.03
 3 13 -3 0.8 0.9
 -3 -13 -3 0.77 0.92
 3 -13 3 0.92 0.48
 3 13 -3 0.1 0.87
 -3 13 3 1.55 0.87
 3 -14 -3 3.31 1.08
 -3 -14 3 4 1.22
 -3 14 -3 3.17 1.01
 3 14 3 1.96 1.08
 -3 -14 3 2.14 0.75
 -3 14 -3 3.9 1.95
 -3 14 -3 2.62 1.08
 -3 -14 3 1.89 1.1
 3 14 3 3.4 1.17
 3 -14 -3 1.05 1.18
 3 14 3 4.33 1.15
 -3 14 3 1.6 1.13
 -3 -14 -3 2.87 0.81
 -3 14 3 2.61 1.1
 3 14 -3 3.67 0.92
 -3 -14 -3 1.36 1.12
 3 14 -3 0.8 1.12
 3 14 -3 4.46 1.11
 3 -14 3 2.91 0.49
 3 -14 3 2.21 1.1
 3 -14 3 2.23 1.14
 -3 -14 -3 0.97 1.02
 -3 -14 -3 1.48 1
 3 15 3 2.25 1.23
 -3 15 -3 4.05 1.18
 3 15 3 2.46 1.12
 -3 -15 3 4.29 1.32
 -3 -15 3 3.68 1.24
 3 -15 -3 1.96 0.69
 3 15 3 3.29 1.21
 -3 15 -3 3.02 1.05
 3 -15 -3 1.56 1.18
 -3 -15 3 3.61 0.84
 -3 15 -3 1.75 1.23
 3 -15 -3 0.21 1.24
 3 15 -3 2.31 1.19
 -3 15 3 3.85 1.19
 3 15 -3 2.91 1.16
 -3 15 3 3.73 1.24
 3 -15 3 1.3 1.18
 3 -15 3 3.27 1.23
 -3 -15 -3 4.12 1.28
 3 -15 3 2 0.54
 -3 -15 -3 3.69 1.26
 -3 15 3 1.44 1.07
 3 16 3 0.62 1.19
 -3 16 -3 1.72 1.13
 3 -16 -3 1.25 0.69
 -3 -16 3 2.18 1.27
 3 -16 -3 3.22 1.18
 -3 -16 3 2.01 0.89
 -3 -16 3 -0.57 1.28
 3 -16 -3 0.5 1.34
 -3 16 -3 2.5 1.27
 3 16 -3 1.13 1.22
 3 -16 3 3.04 1.34
 -3 -16 -3 -1.11 1.33
 -3 -16 -3 1.42 0.95
 -3 16 3 1.28 1.17
 -3 16 3 1.86 1.26
 3 -16 3 2.49 1.14
 -3 -16 -3 2.4 1.27
 3 -17 -3 3.36 1.49
 -3 17 -3 1.53 1.35
 3 17 3 -1.86 1.36
 -3 -17 3 0.26 0.92
 -3 -17 3 0.25 1.23
 3 -17 -3 0.4 0.75
 -3 17 -3 -1.08 1.42
 -3 -17 -3 0.82 0.99
 -3 17 3 2.04 1.31
 3 -17 3 -2.04 1.41
 -3 17 3 3.75 1.52
 -3 17 3 1.85 1.45
 3 17 -3 1.33 1.4
 3 17 -3 -0.08 1.34
 3 17 -3 2.04 1.42
 -3 -17 -3 -0.64 1.48
 -4 0 -3 -0.11 0.34
 -4 0 3 -0.17 0.34
 4 0 -3 -0.04 0.34
 -4 0 3 0.03 0.35
 4 0 -3 0.15 0.17
 -4 0 -3 -0.04 0.24
 -4 0 3 0.33 0.18
 4 0 -3 0.25 0.32
 4 0 -3 0.04 0.33
 4 0 3 0.22 0.24
 -4 0 3 0.21 0.37
 4 -1 -3 147.79 3.66
 4 1 3 143.48 3.61
 4 -1 -3 144.9 3.62
 -4 -1 3 150.68 3.71
 -4 -1 3 146.47 3.64
 -4 -1 3 148.3 3.64
 4 1 3 148.78 3.67
 -4 -1 3 153.29 3.61
 4 -1 -3 145.72 3.62
 -4 1 -3 143.11 3.59
 4 -1 3 146.24 3.58
 4 1 -3 147.83 3.6
 -4 1 3 147.62 3.63
 4 1 -3 149.26 3.7
 4 1 -3 145.24 3.64
 -4 -1 -3 141.94 3.6
 -4 -1 -3 141.74 3.6
 -4 -1 -3 154.03 3.67
 -4 1 3 148.24 3.63
 4 1 -3 149.67 3.64
 -4 1 3 146.36 3.66
 4 2 3 33.28 1.08
 -4 -2 3 31.96 1.06
 -4 2 -3 31.15 0.96
 4 -2 -3 32.35 1
 4 -2 -3 31.52 1.02
 -4 -2 3 32.27 1.05
 -4 2 -3 32.71 0.95
 4 2 3 32.57 1.02
 4 2 3 31.97 1.01
 4 -2 -3 31.1 1.02
 -4 -2 3 33.75 1.16
 4 2 -3 33.56 1
 -4 2 3 34.96 1
 4 2 -3 34.62 1.14
 -4 -2 -3 32.38 1.07
 -4 -2 -3 31.46 1.02
 -4 -2 -3 31.57 1.01
 4 -2 3 32.59 0.95
 -4 2 3 33.94 0.88
 -4 2 3 31.09 1.02
 -4 2 3 32.02 1.02
 4 2 -3 32.5 1.09
 4 2 -3 32.24 1.05
 -4 3 -3 1.56 0.4
 4 -3 -3 1.78 0.42
 -4 3 -3 1.19 0.38
 4 3 3 1.5 0.46
 4 -3 -3 1.8 0.43
 4 3 3 1.54 0.43
 -4 -3 3 1.11 0.4
 4 3 3 1.26 0.45
 -4 -3 3 1.69 0.44
 -4 -3 3 1.9 0.41
 4 -3 -3 2.01 0.3
 -4 -3 3 1.76 0.45
 4 3 -3 1.34 0.46
 4 -3 3 1.58 0.4
 4 3 -3 1.39 0.41
 -4 3 3 2.01 0.44
 -4 -3 -3 1.4 0.45
 4 3 -3 2.04 0.39
 -4 -3 -3 1.86 0.4
 4 -3 3 1.49 0.39
 4 3 -3 1.84 0.42
 -4 3 3 1.3 0.41
 -4 -3 -3 2.12 0.43
 -4 3 3 1.53 0.3
 -4 -4 3 24.82 1.05
 -4 -4 3 26.87 1.04
 4 4 3 23.39 1.02
 -4 -4 3 25.68 1.07
 -4 4 -3 23.92 0.95
 -4 -4 3 24.55 1.04
 4 4 3 22.92 1.03
 4 -4 -3 26.13 0.99
 -4 4 -3 24.06 0.96
 4 4 3 25.74 1.03
 4 -4 -3 27.01 0.85
 4 -4 -3 26.43 0.99
 -4 -4 -3 24.48 1.01
 4 4 -3 25.86 1.03
 -4 4 3 27.12 1.02
 -4 -4 -3 23.71 1.01
 -4 4 3 26.02 1.01
 -4 4 3 24.2 0.88
 -4 -4 -3 24.56 1
 4 4 -3 26.36 1.02
 4 4 -3 24.93 1.1
 4 -4 3 23.52 0.95
 4 4 -3 24.99 1.06
 4 -4 3 24.92 0.96
 4 5 3 87.99 2.46
 -4 -5 3 92.82 2.49
 -4 5 -3 86.67 2.44
 4 5 3 87.52 2.48
 -4 -5 3 89.74 2.49
 4 -5 -3 96.24 2.47
 4 5 3 92.36 2.48
 4 -5 -3 93.2 2.45
 -4 -5 3 90.07 2.48
 -4 -5 3 93.8 2.51
 -4 5 -3 88.08 2.43
 -4 -5 -3 93.84 2.48
 4 -5 3 90.55 2.44
 -4 -5 -3 91.51 2.48
 -4 5 3 93.13 2.45
 4 5 -3 93.35 2.48
 -4 -5 -3 86.63 2.47
 4 5 -3 94.08 2.5
 4 -5 3 91.17 2.44
 4 5 -3 88.85 2.48
 -4 5 3 95.97 2.48
 -4 -6 3 25.95 1.18
 4 -6 -3 24.26 1.14
 4 -6 -3 23.85 1.11
 4 6 3 25.6 1.13
 -4 -6 3 22.53 1.17
 4 6 3 23.68 1.16
 4 -6 -3 26.11 0.92
 -4 -6 3 25 1.15
 -4 -6 3 24.97 1.19
 4 6 3 24.11 1.19
 -4 6 -3 24 1.1
 -4 6 -3 24.17 1.12
 -4 6 3 25.09 1.03
 -4 -6 -3 24.65 1.16
 4 -6 3 23.58 1.12
 -4 -6 -3 25.81 1.16
 -4 -6 -3 25.75 1.16
 4 6 -3 25.43 1.17
 4 -6 3 24.28 1.11
 4 6 -3 25.77 1.15
 -4 6 3 22.98 1.15
 -4 6 3 24.18 1.15
 -4 7 -3 97.03 2.58
 4 -7 -3 92.28 2.43
 -4 -7 3 93.24 2.62
 4 7 3 95.19 2.63
 4 -7 -3 93.91 2.59
 4 7 3 91.59 2.63
 -4 -7 3 93.93 2.61
 4 7 3 94.27 2.61
 4 -7 -3 92.22 2.58
 -4 7 -3 90.89 2.57
 -4 -7 3 95.67 2.62
 -4 -7 3 93.42 2.62
 4 7 -3 94.49 2.61
 4 7 -3 93.14 2.64
 4 7 -3 92.23 2.59
 -4 -7 -3 95 2.62
 -4 -7 -3 94.22 2.61
 4 -7 3 92.49 2.58
 -4 7 3 93.06 2.6
 4 -7 3 94.58 2.59
 -4 7 3 94.07 2.54
 -4 -7 -3 91.3 2.62
 -4 7 3 90.26 2.59
 4 8 3 10.94 0.84
 -4 -8 3 11.58 0.85
 -4 -8 3 9.77 0.76
 -4 8 -3 11.7 0.79
 -4 -8 3 11.56 1.03
 4 -8 -3 11.26 0.78
 -4 8 -3 11.13 0.75
 4 -8 -3 10.17 0.82
 4 -8 -3 9.59 0.8
 -4 -8 3 9.78 0.77
 4 8 3 9.32 0.72
 4 8 3 9.76 0.83
 -4 8 -3 11.51 0.79
 -4 -8 -3 9.62 0.75
 4 -8 3 10.31 0.79
 -4 -8 -3 12.62 1.1
 4 -8 3 11.8 0.8
 -4 8 3 12.54 0.85
 4 8 -3 9.86 0.74
 -4 -8 -3 10.35 0.8
 4 8 -3 12.24 0.89
 -4 8 3 12.19 0.81
 4 8 -3 9.85 0.75
 -4 8 3 11.57 0.95
 -4 -9 3 94.15 2.63
 4 -9 -3 90.47 2.66
 -4 -9 3 96.85 2.69
 -4 9 -3 91.92 2.63
 4 9 3 90.88 2.67
 4 9 3 93.9 2.7
 -4 -9 3 91.39 2.68
 -4 9 -3 88.11 2.6
 -4 9 -3 90.28 2.63
 4 9 3 88.53 2.71
 4 -9 -3 93.7 2.66
 -4 -9 -3 90.91 2.65
 4 -9 3 90.8 2.64
 -4 9 3 90.69 2.59
 -4 -9 -3 93.94 2.67
 4 9 -3 88.72 2.69
 -4 9 3 88.55 2.64
 4 9 -3 91.79 2.68
 -4 9 3 89.2 2.63
 4 -9 3 94.11 2.65
 4 9 -3 90.01 2.66
 -4 -9 -3 89.12 2.68
 4 10 3 3.69 0.85
 4 -10 -3 3.19 0.8
 4 10 3 3.87 0.76
 -4 -10 3 2.99 0.61
 -4 10 -3 2.65 0.7
 -4 10 -3 1.99 0.77
 4 -10 -3 4.54 0.82
 -4 -10 3 2.53 0.79
 -4 10 3 3.49 0.82
 4 -10 3 3.88 0.79
 -4 10 3 2.04 0.82
 4 10 -3 3.97 0.8
 -4 -10 -3 2.69 0.73
 4 10 -3 2.68 0.75
 -4 10 3 3.12 0.68
 4 10 -3 2.51 0.87
 4 11 3 3.19 0.97
 -4 -11 3 4.47 0.92
 -4 11 -3 5.05 0.93
 -4 -11 3 4.82 0.69
 -4 11 -3 4.43 0.84
 4 -11 -3 4.53 0.88
 4 11 3 4.54 0.88
 4 -11 -3 2.91 0.89
 -4 11 -3 4.47 0.89
 4 11 3 4.49 1.02
 -4 -11 3 5.93 0.92
 -4 11 3 3.51 0.92
 -4 -11 -3 3.97 0.92
 -4 11 3 3.55 0.88
 -4 11 3 5.37 0.82
 4 -11 3 3.63 0.89
 -4 -11 -3 2.83 0.91
 4 11 -3 4.21 0.91
 4 11 -3 4.92 0.97
 -4 -11 -3 3.79 0.8
 4 12 3 1.56 0.86
 4 12 3 -0.83 0.94
 -4 -12 3 2.41 1.62
 -4 -12 3 0.12 0.66
 -4 12 -3 1.33 0.87
 -4 12 -3 -0.52 1.02
 4 12 3 -1.93 0.96
 -4 12 -3 0.35 0.91
 -4 -12 3 0.02 0.92
 4 -12 -3 -1.34 0.91
 -4 -12 -3 1.74 0.84
 -4 12 3 1.15 0.81
 4 12 -3 -0.83 0.84
 4 12 -3 0.06 0.91
 -4 -12 -3 1.66 1.01
 4 -12 3 1.01 0.91
 -4 12 3 -0.31 0.94
 4 -12 3 -0.21 0.88
 -4 12 3 -1.45 0.9
 -4 -12 -3 -1.14 0.91
 -4 -13 3 5.18 1.1
 4 -13 -3 6.32 1.02
 4 13 3 4.69 1.1
 4 13 3 4.83 0.98
 -4 13 -3 4.07 0.94
 -4 -13 3 7.84 1.17
 -4 13 -3 5.93 1.04
 -4 13 -3 6.35 1.09
 -4 -13 3 5.26 0.8
 4 -13 3 8.06 1.16
 -4 13 3 4.53 0.86
 4 13 -3 5.41 0.98
 -4 13 3 6.39 1.07
 -4 13 3 5.93 1.1
 4 -13 3 6.47 1.07
 -4 -13 -3 6.39 1.09
 4 13 -3 4.82 1.01
 4 13 -3 7.5 1.73
 -4 -13 -3 5.58 0.98
 -4 -13 -3 6.97 1.21
 -4 -14 3 0.71 1.02
 4 14 3 1.97 1.04
 -4 -14 3 1.87 0.82
 -4 14 -3 1.99 0.97
 4 -14 -3 1.22 1.08
 4 -14 -3 1.94 1.04
 -4 -14 3 1.64 1.11
 -4 14 -3 0.23 1.04
 4 14 3 0.78 1.02
 -4 14 -3 3.11 1.1
 -4 -14 -3 1.04 1.09
 4 -14 3 -0.64 1.13
 -4 14 3 0.95 1.05
 4 14 -3 2.82 1.12
 -4 14 3 0.67 1.31
 4 14 -3 3.17 0.96
 -4 -14 -3 -0.16 0.84
 4 -14 3 -0.5 1.04
 -4 14 3 1.41 0.9
 4 15 3 10.46 1.41
 4 15 3 11.29 1.4
 4 15 3 14.01 1.39
 4 -15 -3 11.76 1.3
 4 -15 -3 11.9 0.81
 -4 -15 3 11.05 1.36
 -4 -15 3 11.3 1.02
 -4 -15 3 13.65 1.27
 -4 15 -3 11.35 1.22
 4 -15 -3 10.65 1.3
 4 -15 3 9.28 1.21
 -4 -15 -3 12.32 1.35
 -4 -15 -3 10.23 1.29
 -4 15 3 10.8 1.24
 -4 15 3 13.79 1.35
 -4 15 3 14.24 1.42
 4 15 -3 11.35 1.4
 -4 -15 -3 10.44 1.05
 4 15 -3 13.74 1.43
 4 -16 -3 3.69 1.19
 4 -16 -3 1.53 1.27
 4 -16 -3 0.66 0.67
 -4 -16 3 1.95 0.94
 -4 16 -3 1.83 1.31
 -4 -16 3 2.28 1.33
 4 16 3 1.91 1.4
 4 16 3 1.73 1.26
 -4 16 -3 0.98 1.15
 -4 16 -3 1.42 1.31
 4 -16 3 3.8 1.38
 -4 16 3 0.35 1.3
 4 16 -3 1.74 1.32
 -4 -16 -3 2.22 1.28
 -4 -16 -3 2.69 0.97
 -4 16 3 4.15 1.35
 4 16 -3 2.42 1.3
 -5 0 3 0.32 0.31
 5 0 -3 -0.56 0.35
 5 0 -3 0.75 0.31
 -5 0 3 0.24 0.35
 5 0 -3 -0.09 0.2
 -5 0 3 0.14 0.32
 5 0 -3 0.03 0.32
 -5 0 -3 0.05 0.34
 -5 -1 3 19.54 0.75
 5 -1 -3 18.35 0.73
 -5 -1 3 20.06 0.92
 5 1 3 19.01 0.67
 -5 -1 3 19.36 0.76
 5 -1 -3 19.36 0.72
 5 -1 -3 19.8 0.84
 5 1 3 19.45 0.81
 5 1 -3 19.71 0.75
 -5 1 3 20.05 0.72
 -5 1 3 18.92 0.72
 5 1 -3 20.09 0.78
 -5 -1 -3 20.52 0.82
 -5 -1 -3 19.08 0.66
 5 1 -3 18.78 0.66
 5 1 -3 19.16 0.91
 5 -2 -3 102.86 2.62
 5 -2 -3 101.88 2.59
 5 2 3 101.59 2.58
 -5 -2 3 107.57 2.6
 5 -2 -3 100.86 2.59
 -5 -2 3 100.37 2.61
 5 2 3 101.14 2.58
 5 2 3 103.87 2.65
 -5 -2 3 105.89 2.7
 -5 -2 3 102.36 2.62
 5 2 -3 100.97 2.61
 -5 -2 -3 103.66 2.65
 -5 -2 -3 99.85 2.58
 5 -2 3 100.19 2.54
 -5 -2 -3 103.39 2.58
 -5 2 3 104.94 2.61
 5 2 -3 103.49 2.7
 5 2 -3 101.58 2.59
 -5 2 3 102.47 2.59
 5 2 -3 102.5 2.62
 -5 2 3 100.72 2.59
 5 3 3 16.8 0.88
 5 3 3 16.46 0.83
 -5 -3 3 18.38 0.94
 -5 3 -3 16.96 0.71
 5 3 3 15.48 0.83
 5 -3 -3 17.34 0.8
 -5 -3 3 17.52 0.86
 -5 -3 3 17.72 0.85
 5 -3 -3 16.19 0.75
 5 -3 -3 15.93 0.77
 -5 -3 -3 17.02 0.88
 -5 3 3 17.41 0.81
 -5 3 3 18.47 0.64
 5 3 -3 16.21 0.96
 5 3 -3 18.6 0.8
 -5 -3 -3 17.04 0.8
 5 -3 3 16.53 0.75
 5 3 -3 16.17 0.85
 5 -3 3 17 0.72
 -5 -3 -3 15.9 0.82
 -5 3 3 17.2 0.79
 5 3 -3 18.17 0.84
 5 -4 -3 5.77 0.5
 -5 4 -3 6.53 0.51
 5 4 3 6.27 0.58
 -5 -4 3 7.06 0.62
 -5 -4 3 5.44 0.54
 5 -4 -3 5.61 0.37
 -5 4 -3 6.82 0.5
 5 4 3 5.68 0.53
 -5 -4 3 5.73 0.55
 5 4 3 6.59 0.56
 -5 -4 3 6.14 0.52
 5 -4 -3 5.97 0.53
 -5 -4 -3 5.11 0.54
 5 -4 3 5.62 0.5
 -5 4 3 6.09 0.52
 -5 4 3 6.09 0.53
 -5 -4 -3 6.57 0.57
 -5 4 3 5.85 0.41
 5 4 -3 6.24 0.57
 -5 -4 -3 5.18 0.52
 5 4 -3 5.63 0.51
 5 4 -3 5.31 0.53
 5 -4 3 6.41 0.49
 5 -5 -3 2.87 0.56
 -5 -5 3 1.96 0.5
 5 5 3 2.65 0.59
 -5 -5 3 3.01 0.57
 -5 -5 3 3.1 0.53
 -5 5 -3 2.24 0.49
 -5 -5 3 3.09 0.6
 5 5 3 2.67 0.52
 5 -5 -3 3.3 0.33
 -5 5 -3 1.6 0.54
 5 5 3 1.81 0.59
 5 -5 -3 3.18 0.55
 -5 -5 -3 2.57 0.55
 -5 5 3 2.15 0.53
 5 -5 3 2.19 0.5
 5 5 -3 3.17 0.55
 -5 -5 -3 2.74 0.6
 5 5 -3 3.01 0.58
 -5 -5 -3 3.65 0.54
 -5 5 3 1.96 0.43
 5 -5 3 2.22 0.51
 -5 5 3 3.17 0.53
 5 5 -3 2.79 0.51
 5 6 3 19.04 1.08
 -5 -6 3 19.48 1.07
 -5 -6 3 19.07 1.1
 -5 6 -3 20.37 1.02
 5 6 3 18.96 1.1
 5 -6 -3 18.97 1.02
 -5 -6 3 19.97 1.09
 -5 6 -3 17.9 1.01
 -5 -6 3 19.07 1.09
 5 6 3 20.98 1.09
 5 -6 -3 20.64 1.02
 5 -6 -3 21.23 0.79
 -5 -6 -3 19.25 1.07
 5 -6 3 19.05 1.01
 5 6 -3 20.2 1.04
 -5 6 3 19.21 0.92
 -5 6 3 18.9 1.06
 5 -6 3 20.89 1.02
 -5 -6 -3 17.49 1.08
 5 6 -3 19.91 1.08
 -5 6 3 17.32 1.04
 -5 -6 -3 18.82 1.07
 -5 -7 3 29.1 1.27
 5 -7 -3 28.25 0.96
 -5 7 -3 27.08 1.19
 -5 -7 3 29.18 1.32
 -5 -7 3 26.36 1.26
 5 7 3 27.72 1.25
 5 -7 -3 28.67 1.23
 5 7 3 26.65 1.3
 -5 -7 3 29.5 1.29
 5 -7 -3 24.9 1.22
 -5 7 -3 28.18 1.18
 5 7 3 25.23 1.25
 5 7 -3 26.74 1.25
 -5 7 3 24.89 1.24
 -5 -7 -3 25.55 1.26
 -5 -7 -3 28.36 1.28
 -5 7 3 26.73 1.14
 5 7 -3 27.13 1.26
 5 -7 3 26.31 1.2
 -5 -7 -3 27.03 1.27
 5 7 -3 26.74 1.31
 -5 7 3 26.4 1.24
 5 -7 3 29.13 1.22
 -5 -8 3 4.08 0.69
 5 -8 -3 4.42 0.42
 -5 8 -3 5.53 0.72
 -5 8 -3 4.66 0.64
 5 8 3 3.22 0.7
 5 8 3 4.43 0.68
 5 -8 -3 4.71 0.69
 5 8 3 4.76 0.72
 5 -8 -3 3 0.65
 -5 -8 3 5.92 0.77
 -5 -8 3 4.94 0.61
 -5 -8 3 4.83 0.69
 -5 8 3 5.5 0.69
 5 8 -3 3.91 0.67
 -5 -8 -3 3.87 0.68
 -5 8 3 3.4 0.59
 5 -8 3 3.47 0.66
 5 -8 3 4.25 0.67
 -5 -8 -3 3.65 0.69
 5 8 -3 3.86 0.77
 -5 -8 -3 4.39 0.7
 -5 8 3 3.93 0.7
 5 9 3 3.1 0.8
 5 9 3 3.14 0.7
 -5 9 -3 3.46 0.77
 -5 -9 3 2.9 0.59
 5 -9 -3 2.57 0.79
 -5 9 -3 4.22 0.73
 -5 -9 3 2.53 0.7
 5 9 3 2.5 0.77
 -5 -9 3 2.45 0.78
 5 -9 -3 2.7 0.43
 -5 9 3 3.15 0.74
 5 9 -3 3.32 0.75
 5 9 -3 2.8 0.82
 -5 9 3 2.31 0.63
 5 -9 3 1.27 0.73
 -5 9 3 3.1 0.73
 -5 -9 -3 2.35 0.7
 5 -9 3 4.1 0.78
 5 9 -3 1.98 0.68
 -5 -9 -3 2.51 0.74
 -5 10 -3 17.12 1.3
 -5 -10 3 19.03 1.46
 -5 10 -3 18.32 1.33
 5 10 3 16.99 1.35
 -5 10 -3 17.29 1.37
 5 -10 -3 15.93 1.36
 5 10 3 16.29 1.44
 -5 -10 3 17.98 1.33
 5 -10 -3 14.38 1.29
 5 -10 -3 16.37 0.95
 -5 -10 3 18.28 1.41
 5 10 3 17.96 1.51
 5 10 -3 16.92 1.4
 -5 10 3 17.1 1.26
 -5 10 3 16.31 1.37
 -5 10 3 16.63 1.41
 5 10 -3 17.67 1.36
 -5 -10 -3 15.83 1.06
 -5 -10 -3 16.93 1.39
 5 -10 3 17.33 1.37
 5 -10 3 15.41 1.37
 5 10 -3 17.36 1.41
 -5 11 -3 1.61 0.78
 -5 11 -3 0.1 0.73
 5 -11 -3 -1.19 0.84
 5 11 3 -1.32 1.09
 -5 -11 3 1.86 0.95
 5 11 3 0.25 0.95
 5 -11 -3 0.64 0.98
 5 -11 -3 -0.01 0.46
 -5 -11 3 0.8 0.81
 -5 -11 3 0.71 0.69
 -5 11 -3 1.28 0.84
 -5 11 3 -0.46 0.83
 -5 11 3 0.4 0.83
 5 11 -3 1.7 0.91
 5 11 -3 0.73 0.81
 -5 -11 -3 0.13 0.86
 5 11 -3 0.6 1.12
 -5 -11 -3 -0.5 0.86
 -5 11 3 -0.04 0.73
 5 -11 3 -0.03 0.82
 -5 -11 -3 1.37 0.79
 -5 12 -3 0.48 0.89
 -5 -12 3 -1.05 0.91
 -5 12 -3 -0.64 0.98
 -5 12 -3 0.73 0.92
 5 12 3 1.7 0.96
 5 12 3 1.71 1.03
 5 -12 -3 1.6 0.52
 5 -12 -3 0.02 0.85
 5 12 3 0.83 0.87
 5 12 -3 -1.04 0.95
 5 -12 3 -0.07 0.9
 5 -12 3 2.4 0.97
 -5 12 3 -0.12 0.76
 -5 12 3 0.34 0.91
 5 12 -3 0.47 0.92
 -5 -12 -3 1.46 1.01
 -5 -12 -3 1.07 0.95
 5 12 -3 1.22 0.9
 -5 -12 -3 1.13 0.83
 -5 12 3 -0.31 0.94
 5 13 3 -0.47 0.92
 -5 13 -3 1.2 1.05
 -5 -13 3 1.38 1.06
 5 13 3 -0.31 1
 5 -13 -3 0.61 0.91
 5 13 3 1.38 1.09
 -5 -13 3 0.55 0.74
 -5 13 3 1.55 1.01
 5 13 -3 0.82 1.03
 -5 13 3 1.72 1.03
 5 13 -3 0.4 0.9
 -5 -13 -3 -1.81 1.65
 5 -13 3 2.17 0.98
 -5 13 3 -0.71 0.82
 5 -13 3 -0.48 0.98
 -5 -13 -3 1.58 1.03
 5 13 -3 0.16 0.98
 -5 -13 -3 0.32 0.93
 -5 -13 -3 -0.72 1.2
 5 14 3 1.66 1.13
 -5 14 -3 0.16 0.99
 -5 14 -3 3.71 1.06
 -5 -14 3 3.53 1.01
 -5 -14 3 1.43 1.08
 5 -14 -3 1.61 1.19
 -5 14 -3 2.53 1.04
 -5 -14 3 2.16 0.88
 5 14 3 1.78 1.03
 5 14 3 1.2 1.17
 5 -14 -3 1.16 1.06
 -5 14 3 2.3 1.18
 5 -14 3 2.16 1.12
 5 14 -3 0.28 1.1
 5 14 -3 1.25 1.06
 -5 14 3 2.6 1.07
 -5 -14 -3 1.55 1.08
 -5 14 3 2.18 0.88
 -5 -14 -3 1.32 1.17
 5 -14 3 1.4 1.13
 -5 -14 -3 0.71 1
 5 -15 -3 0.21 0.59
 5 -15 -3 0.6 1.14
 5 -15 -3 1.82 1.13
 -5 15 -3 -1.27 1.08
 -5 -15 3 -1.47 1.22
 -5 15 -3 0.81 1.2
 -5 -15 3 -1.36 0.83
 5 15 3 0.04 1.12
 -5 15 -3 -0.56 1.16
 -5 15 3 0.44 1.2
 -5 -15 -3 0.53 1.09
 -5 -15 -3 0.14 1.18
 5 15 -3 -0.38 1.14
 5 -15 3 1.93 1.22
 5 15 -3 -0.82 1.04
 -5 15 3 -1.18 0.96
 -5 -15 -3 1.21 0.89
 -5 -15 -3 0.1 1.2
 5 -15 3 1.18 1.12
 5 15 -3 0.12 1.18
 -5 15 3 1.12 1.23
 -5 16 -3 1.84 1.17
 5 16 3 0.13 1.41
 5 16 3 1.74 1.21
 -5 -16 3 0.15 0.95
 -5 16 -3 0.36 1.3
 -5 -16 3 1.59 1.24
 5 -16 -3 3.47 1.36
 5 16 3 1.32 1.34
 -5 16 -3 1.7 1.24
 5 -16 -3 1.52 1.26
 5 -16 3 -0.31 1.35
 -5 -16 -3 1.29 1
 -5 16 3 2.41 1.33
 5 16 -3 -0.35 1.24
 -5 16 3 3.64 1.39
 5 -16 3 0.57 1.09
 5 16 -3 2.8 1.29
 5 16 -3 2.36 1.28
 -5 -16 -3 2.54 1.28
 -6 0 3 0.12 0.32
 -6 0 3 0.79 0.37
 -6 0 -3 -0.05 0.35
 6 0 -3 0.09 0.33
 -6 0 3 0.29 0.32
 6 0 -3 -0.11 0.21
 6 0 -3 0.34 0.33
 6 0 -3 -0.01 0.38
 6 1 3 133.29 3.29
 -6 -1 3 124.75 3.23
 -6 -1 3 128.99 3.24
 -6 -1 3 134.19 3.35
 -6 -1 3 135.35 3.22
 6 -1 -3 130.82 3.31
 6 1 3 129.84 3.19
 6 -1 -3 126.24 3.22
 -6 1 3 131.37 3.16
 -6 1 3 127.63 3.22
 -6 -1 -3 127.79 3.19
 6 1 -3 128.94 3.24
 -6 1 3 134.22 3.3
 -6 1 3 123.95 3.22
 -6 -1 -3 132.69 3.29
 6 1 -3 129.12 3.21
 6 1 -3 127.06 3.24
 6 1 -3 135.75 3.35
 -6 -2 3 153.67 3.96
 6 2 3 145.88 3.83
 6 2 3 157.99 3.91
 6 -2 -3 157.29 3.84
 -6 -2 3 152.43 3.86
 6 -2 -3 157.32 3.88
 -6 -2 3 157.46 3.86
 6 2 -3 156.5 3.97
 -6 2 3 162.55 3.83
 6 2 -3 161.33 3.86
 -6 -2 -3 148.74 3.9
 -6 -2 -3 156.17 3.83
 6 2 -3 148.03 3.86
 -6 2 3 159.05 3.84
 -6 -2 -3 148.1 3.82
 -6 2 3 160.83 3.87
 -6 -3 3 4.01 0.52
 6 -3 -3 4.08 0.45
 6 -3 -3 4.56 0.39
 -6 -3 3 4.52 0.46
 6 3 3 4.62 0.49
 -6 -3 3 3.41 0.5
 6 3 3 4.38 0.5
 6 -3 -3 4.58 0.48
 -6 -3 3 3.46 0.47
 6 3 3 4.3 0.47
 -6 3 -3 3.71 0.4
 -6 3 3 3.65 0.33
 -6 3 3 3.35 0.32
 -6 -3 -3 3.42 0.47
 6 3 -3 4.51 0.45
 6 3 -3 3.53 0.47
 6 3 -3 3.73 0.5
 -6 -3 -3 3.96 0.48
 6 3 -3 3.5 0.51
 6 -3 3 3.86 0.4
 -6 3 3 4.39 0.44
 -6 3 3 4.43 0.46
 6 4 3 8.16 0.62
 -6 4 -3 9.12 0.55
 -6 4 -3 9.1 0.7
 -6 -4 3 9.47 0.83
 6 -4 -3 9.35 0.58
 -6 -4 3 9.2 0.67
 6 4 3 9.2 0.62
 6 4 3 7.77 0.61
 -6 -4 3 9.54 0.62
 6 -4 -3 9.26 0.59
 6 -4 -3 8.87 0.68
 6 -4 3 8.65 0.54
 -6 4 3 9.29 0.57
 -6 -4 -3 7.58 0.58
 6 4 -3 9.84 0.81
 -6 -4 -3 8.04 0.6
 -6 -4 -3 9.87 0.64
 -6 4 3 8.56 0.58
 6 4 -3 7.82 0.59
 -6 4 3 7.84 0.6
 6 4 -3 8.96 0.62
 6 -4 3 9.81 0.56
 6 4 -3 9.45 0.67
 6 5 3 6.78 0.63
 6 5 3 7.6 0.64
 -6 -5 3 7.68 0.62
 -6 -5 -3 6.73 0.66
 -6 -6 3 1.8 0.56
 -6 6 -3 2.08 0.53
 6 6 3 2.71 0.57
 -6 6 -3 1.97 0.51
 -6 -6 3 2.72 0.56
 -6 -6 3 2.18 0.53
 -6 -6 3 3.19 0.66
 6 6 3 2.72 0.56
 6 6 3 2.52 0.58
 -6 -6 -3 3.19 0.57
 6 -6 3 2.66 0.54
 6 6 -3 2.91 0.55
 -6 6 3 2.42 0.54
 6 -6 3 3.38 0.57
 -6 -6 -3 2.32 0.56
 -6 -6 -3 2.07 0.63
 6 6 -3 2.9 0.64
 -6 6 3 2.74 0.46
 -6 -7 3 0.3 0.53
 6 -7 -3 0.99 0.61
 -6 -7 3 0.22 0.59
 -6 -7 3 1.37 0.67
 6 7 3 -0.42 0.63
 -6 7 -3 0.88 0.58
 6 -7 -3 0.23 0.56
 -6 7 -3 0.27 0.53
 6 7 3 1.04 0.57
 6 7 3 1.22 0.67
 -6 -7 3 0.65 0.59
 -6 -7 -3 1.24 0.58
 6 7 -3 -0.23 0.65
 6 -7 3 -0.07 0.55
 -6 7 3 0.12 0.58
 -6 7 3 -0.06 0.47
 -6 7 3 0.78 0.56
 -6 -7 -3 0.63 0.56
 6 7 -3 -0.06 0.62
 -6 -7 -3 0.13 0.63
 6 -7 3 0.36 0.6
 6 7 -3 0.16 0.55
 -6 -8 3 30.32 1.4
 6 8 3 29.11 1.43
 6 -8 -3 28.32 1.35
 -6 -8 3 32.66 1.41
 -6 -8 3 31.3 1.43
 6 8 3 29.04 1.41
 6 -8 -3 30.82 1.05
 6 8 3 31.05 1.41
 -6 -8 3 31.78 1.42
 6 -8 -3 30.76 1.37
 -6 8 -3 30.39 1.33
 -6 8 -3 32.34 1.31
 -6 8 3 31.8 1.37
 -6 -8 -3 31.48 1.44
 6 -8 3 31.9 1.35
 6 8 -3 30.31 1.36
 -6 8 3 30.24 1.24
 -6 -8 -3 27.93 1.41
 6 8 -3 31.7 1.42
 -6 8 3 28.93 1.39
 6 -8 3 32.5 1.34
 6 8 -3 31.14 1.46
 6 9 3 23.99 1.45
 6 -9 -3 22.01 1.32
 -6 9 -3 20.13 1.22
 6 9 3 25.18 1.37
 -6 9 -3 25.2 1.32
 -6 -9 3 21.67 1.4
 -6 -9 3 25.25 1.38
 -6 -9 3 21.28 1.36
 6 -9 -3 22.23 0.94
 -6 -9 3 23.71 1.36
 6 -9 -3 21.91 1.35
 -6 9 -3 22.55 1.29
 6 9 3 23.24 1.38
 -6 -9 -3 23.27 1.39
 6 9 -3 23.12 1.43
 6 9 -3 24.27 1.38
 -6 9 3 19.93 1.23
 -6 9 3 22.48 1.31
 -6 9 3 20.87 1.38
 6 -9 3 22.93 1.3
 -6 -9 -3 21.49 1.35
 6 9 -3 21.91 1.35
 6 -9 3 21.52 1.32
 6 10 3 16.26 1.08
 -6 -10 3 17.78 1.49
 -6 -10 3 19.1 1.48
 -6 10 -3 18.13 1.39
 6 10 3 19.14 1.22
 6 -10 -3 17.78 0.94
 -6 10 -3 15.99 1.28
 -6 -10 3 18.06 1.43
 6 -10 -3 16.3 1.34
 6 -10 -3 18.28 1.42
 -6 -10 3 16.59 1.42
 -6 10 -3 15.99 1.3
 -6 10 3 17.55 1.08
 -6 -10 -3 17.27 1.1
 6 10 -3 16.09 1.44
 -6 -10 -3 16.14 1.09
 6 -10 3 16.72 1.05
 -6 -10 -3 16.1 1.44
 -6 10 3 17.95 1.14
 -6 10 3 18.31 1.27
 6 10 -3 16.91 1.09
 6 10 -3 16.33 1.44
 6 -10 3 16.82 1.37
 6 -11 -3 7.05 0.91
 6 -11 -3 8.16 0.97
 -6 -11 3 8.84 1.04
 -6 11 -3 7.3 0.9
 -6 11 -3 8.6 0.95
 6 11 3 9.47 1.02
 6 11 3 8.21 1.04
 -6 -11 3 6.04 0.81
 6 11 3 9.15 0.99
 -6 -11 3 6.59 0.98
 6 -11 -3 7.5 0.55
 6 11 -3 8.17 0.95
 -6 11 3 6.29 1.15
 6 -11 3 7.56 0.97
 6 11 -3 8.36 1.01
 -6 11 3 8.87 0.86
 -6 11 3 6.72 1
 -6 -11 -3 6.8 1.02
 6 -11 3 7.93 0.92
 -6 12 -3 6.4 1.01
 6 12 3 4.76 1.01
 6 12 3 3.76 0.96
 6 -12 -3 4.4 0.52
 -6 -12 3 4.17 0.95
 -6 12 -3 4.85 1.01
 -6 -12 3 3.7 0.88
 -6 -12 3 3.85 0.79
 6 12 3 6.24 1.09
 -6 -12 -3 3.37 0.95
 6 12 -3 5.14 0.97
 6 -12 3 5.32 1.02
 6 -12 3 6.75 1.04
 6 12 -3 5.06 1.02
 6 12 -3 5.39 0.97
 -6 -12 -3 4.83 1.05
 -6 -12 -3 4.12 0.99
 -6 12 3 5.15 0.99
 -6 12 3 6.04 1.06
 -6 12 3 3.5 0.85
 6 13 3 15.79 1.3
 6 -13 -3 15.64 1.27
 -6 -13 3 12.9 1.21
 6 -13 -3 15 1.16
 6 -13 -3 15.46 1.05
 -6 13 -3 14.23 1.17
 -6 -13 -3 17.21 1.3
 6 13 -3 15.21 1.25
 -6 13 3 13.48 1.15
 -6 13 3 15.03 1.25
 -6 13 3 17.57 1.28
 6 -13 3 15.82 1.25
 6 13 -3 13.36 1.21
 -6 -13 -3 17.38 1.66
 6 13 -3 16.42 1.29
 -6 14 -3 11.48 1.24
 -6 14 -3 9.37 1.14
 6 -14 -3 12.37 1.24
 -6 14 -3 12.21 1.28
 -6 -14 3 10.05 1.29
 6 14 3 10.51 1.28
 6 -14 -3 8.92 1.19
 6 14 3 11.5 1.29
 -6 -14 3 11.56 1.3
 6 14 3 10.48 1.33
 6 -14 3 11.12 1.3
 -6 -14 -3 8.98 1.23
 6 14 -3 9.83 1.29
 -6 14 3 10.76 1.28
 6 -14 3 10.69 1.27
 6 14 -3 10.4 1.23
 6 14 -3 10.44 1.19
 -6 -14 -3 10.89 1.19
 -6 14 3 9.23 1.05
 -6 14 3 11.89 1.25
 -6 -14 -3 9.29 1.28
 -6 15 -3 8.57 1.97
 -6 15 -3 10.59 1.25
 -6 -15 3 10.62 1.27
 6 15 3 8.5 1.46
 -6 15 -3 7.36 1.31
 -6 -15 3 7.9 1.03
 6 -15 -3 9.78 1.26
 -6 -15 3 8.33 1.3
 -6 15 3 10.59 1.37
 -6 -15 -3 10.04 1.4
 -6 15 3 9.39 1.44
 6 15 -3 6.34 1.17
 -6 -15 -3 11.3 1.45
 6 -15 3 9.91 1.41
 6 15 -3 9.35 1.43
 -6 -15 -3 8.35 1.29
 -6 15 3 8.32 1.12
 6 15 -3 11 1.36
 6 16 3 1.64 1.32
 -6 16 -3 5.53 1.19
 -6 -16 3 6.15 1.37
 -6 16 -3 5.08 1.33
 -6 -16 3 3.54 1.02
 -6 -16 3 2.18 1.29
 6 -16 -3 3.49 1.27
 6 -16 -3 2.83 1.32
 6 16 3 3.93 1.35
 6 16 3 3.63 1.51
 -6 16 -3 4.18 1.33
 -6 16 3 4.34 1.34
 -6 16 3 1.21 1.19
 -6 -16 -3 5.68 1.55
 -6 -16 -3 3.7 1.05
 -6 16 3 4.46 1.31
 -6 -16 -3 2.6 1.29
 6 -16 3 3.06 1.09
 6 16 -3 6.12 1.44
 6 -16 3 2.8 1.42
 6 16 -3 2.41 1.41
 -6 -16 -3 4.89 1.36
 6 16 -3 4.49 1.34
 -7 0 -3 0.02 0.36
 -7 0 3 -0.21 0.34
 -7 0 3 0.79 0.4
 7 0 -3 0.12 0.39
 7 0 -3 0.02 0.32
 -7 0 3 0.01 0.32
 -7 -1 3 33.19 1.23
 7 -1 -3 30.35 1.14
 -7 -1 3 31.32 0.98
 7 -1 -3 30.32 0.96
 7 1 3 31.23 1.08
 -7 -1 3 31.35 1
 -7 -1 3 31.3 0.93
 -7 -1 -3 31.46 1.07
 7 1 -3 31.77 0.99
 -7 1 3 30.55 0.96
 -7 1 3 32.81 1.1
 -7 1 3 29.51 0.85
 -7 1 3 30.94 0.96
 7 1 -3 30.5 0.94
 7 1 -3 32.56 1.23
 7 1 -3 30.8 1
 7 -2 -3 27.43 0.91
 -7 2 3 25.3 0.89
 -7 -3 3 4.8 0.47
 7 3 3 5.15 0.47
 -7 -3 -3 4.11 0.46
 7 3 -3 3.4 0.53
 7 3 -3 4.29 0.45
 7 -4 -3 22.22 0.95
 7 -4 -3 23 0.98
 -7 4 -3 23.34 0.9
 7 4 3 23.73 1.01
 -7 -4 3 25.96 1.05
 -7 4 -3 24.16 0.89
 7 4 3 24.56 1.03
 -7 -4 3 24.13 1.05
 -7 -4 3 21.92 1.05
 7 4 3 25.76 1.09
 7 -4 -3 24.48 0.91
 -7 -4 3 25.58 1.19
 -7 -4 -3 22.39 0.99
 7 -4 3 24.57 0.9
 -7 4 3 24.3 0.98
 7 4 -3 23.27 1.07
 -7 4 3 23.52 0.85
 7 4 -3 25.03 1.01
 7 4 -3 22.46 1.04
 -7 4 3 24.01 0.96
 -7 -4 -3 24.16 1.1
 -7 -4 -3 23.96 1.02
 -7 4 3 25.62 0.87
 7 -5 -3 9.29 0.67
 -7 5 -3 10.22 0.6
 7 5 3 9.72 0.66
 -7 -5 3 10.35 0.71
 -7 -5 3 8.92 0.67
 7 -5 -3 8.84 0.79
 -7 5 -3 10.39 0.61
 7 -5 -3 11.07 0.67
 -7 -5 3 9.63 0.66
 7 5 3 10.83 0.72
 7 5 -3 10.59 0.74
 -7 5 3 10.14 0.65
 7 5 -3 10.66 0.85
 -7 5 3 10.38 0.64
 7 -5 3 10.02 0.6
 -7 -5 -3 9.97 0.68
 -7 5 3 9.61 0.71
 7 5 -3 9.19 0.65
 7 -5 3 10.29 0.61
 -7 -5 -3 10.41 0.68
 -7 -6 3 8.83 0.68
 -7 6 -3 10.3 0.65
 7 -6 -3 10.24 0.89
 7 6 3 8.41 0.69
 7 -6 -3 9.32 0.67
 7 -6 -3 8.87 0.64
 7 6 3 10.13 0.74
 7 6 3 10.48 0.76
 -7 -6 3 8.73 0.68
 -7 -6 3 9.64 0.72
 -7 -6 3 9.7 0.74
 -7 6 -3 9.83 0.67
 -7 6 3 9.61 0.78
 7 6 -3 9.24 0.68
 -7 -6 -3 9.76 0.76
 7 -6 3 10.38 0.68
 -7 6 3 9.94 0.69
 7 -6 3 10.77 0.88
 -7 6 3 10.48 0.72
 7 6 -3 11.04 0.76
 -7 -6 -3 8.51 0.69
 7 7 3 10.62 0.82
 -7 -7 3 11.33 0.85
 -7 -7 3 12.56 1.14
 7 -7 -3 10.76 0.77
 -7 -7 3 9.66 0.75
 -7 -7 3 10.02 0.77
 7 7 3 10.2 0.77
 7 -7 -3 11.64 0.71
 -7 7 -3 11.41 0.97
 7 -7 -3 10.1 0.73
 7 7 3 12.34 1.05
 7 7 -3 10.11 0.81
 7 -7 3 12.09 0.97
 -7 7 3 12.23 1.01
 -7 -7 -3 9.36 0.76
 -7 -7 -3 9.11 0.74
 -7 7 3 10.45 0.74
 7 7 -3 11.57 1.02
 7 8 3 7.25 0.76
 -7 -8 3 6.95 0.71
 7 -8 -3 8.19 0.71
 7 8 3 8.21 0.85
 7 8 3 8.68 0.87
 -7 8 -3 8.71 0.74
 7 -8 -3 8.73 0.8
 7 -8 -3 7.2 0.73
 -7 8 -3 8.95 0.76
 -7 -8 3 7.77 0.77
 -7 -8 3 7.66 0.8
 -7 -8 -3 6.85 0.77
 7 -8 3 8.75 0.75
 7 -8 3 8.1 0.74
 7 8 -3 8.9 0.8
 -7 8 3 7.74 0.66
 -7 -8 -3 7.88 0.83
 -7 8 3 9.24 0.77
 -7 8 3 7.2 0.76
 7 8 -3 8.49 0.78
 7 8 -3 9.05 0.89
 7 9 3 1.74 0.82
 7 -9 -3 2.14 0.7
 -7 -9 3 1.17 0.71
 -7 -9 3 2.62 0.66
 7 -9 -3 2.62 0.72
 7 9 3 2.31 0.75
 7 -9 -3 1.54 0.38
 -7 9 -3 1.01 0.71
 -7 -9 3 1.1 0.75
 -7 -9 3 1.9 0.82
 -7 9 -3 3.12 0.7
 7 9 3 1.44 0.75
 -7 -9 -3 2.93 0.77
 7 9 -3 1.54 0.73
 -7 9 3 2.56 0.72
 7 -9 3 2.52 0.72
 -7 -9 -3 0.52 0.83
 7 9 -3 2.55 0.78
 7 9 -3 3.64 0.84
 -7 9 3 2.2 0.64
 7 -9 3 2.31 0.76
 -7 9 3 2.43 0.79
 -7 -9 -3 2.16 0.77
 -7 10 -3 2.36 0.8
 -7 -10 3 3.08 0.84
 -7 -10 3 2.3 0.73
 7 10 3 2.96 0.85
 -7 10 -3 2.68 0.83
 7 10 3 1.19 0.83
 -7 -10 3 4.25 0.88
 7 -10 -3 3.7 0.83
 7 -10 -3 4.31 0.87
 7 10 3 3.32 0.89
 -7 10 -3 3.25 0.76
 7 -10 -3 2.81 0.42
 7 -10 3 4.25 0.87
 7 -10 3 4.16 0.83
 -7 -10 -3 3.92 0.92
 7 10 -3 1.94 0.8
 7 10 -3 3.11 0.81
 -7 10 3 2.99 0.71
 7 10 -3 1.81 0.92
 -7 10 3 2.19 0.82
 -7 -10 -3 1.78 0.82
 -7 -10 -3 2.88 0.94
 -7 10 3 3.59 0.89
 7 11 3 11.59 1.12
 -7 11 -3 8.13 0.92
 7 11 3 9.85 1.02
 -7 -11 3 10.5 1.02
 7 -11 -3 8.93 0.95
 -7 11 -3 11.22 0.98
 -7 -11 3 9.13 0.87
 -7 11 -3 9.99 1.67
 -7 -11 3 10.68 1.03
 7 11 3 10.43 1.06
 -7 -11 3 8.44 1.56
 7 -11 -3 10.5 1.09
 7 11 -3 10.51 1.14
 7 11 -3 9.15 1.01
 -7 -11 -3 9.72 1.02
 -7 11 3 11.45 1
 -7 11 3 10.98 1.11
 -7 -11 -3 11.59 1.14
 -7 -11 -3 9.26 1.01
 7 11 -3 10.05 1.03
 -7 11 3 9.72 0.9
 -7 -12 3 1.6 1.01
 7 -12 -3 3.32 1.02
 -7 -12 3 1.42 1.3
 7 -12 -3 2.33 0.45
 -7 12 -3 3.91 0.98
 7 12 3 4.23 1.07
 -7 -12 3 1.69 1.01
 7 12 3 0.85 0.92
 -7 12 -3 2.14 0.86
 7 12 3 4.1 0.98
 -7 12 -3 2.7 0.98
 -7 12 3 1.71 0.97
 -7 -12 -3 2.61 0.92
 7 12 -3 2.09 0.91
 7 -12 3 3.89 0.92
 -7 -12 -3 2.17 0.95
 -7 -12 -3 2.3 0.78
 -7 12 3 3.83 1
 7 -12 3 1.78 0.92
 7 12 -3 2.41 0.92
 -7 12 3 0.6 0.8
 7 12 -3 2.71 1.04
 -7 -12 -3 3.21 1.06
 7 13 3 2.2 1.04
 -7 -13 3 0.79 0.84
 -7 -13 3 0.24 1.04
 7 -13 -3 -0.19 1.03
 -7 13 -3 1.56 1.03
 7 -13 -3 1.14 0.96
 -7 13 -3 -0.29 0.91
 -7 13 -3 2.62 1.03
 7 13 3 0.43 1
 7 13 3 1.84 1.15
 -7 -13 3 0.79 1.44
 7 13 -3 0.93 1.06
 -7 13 3 -0.61 0.96
 7 13 -3 1.17 1.04
 -7 13 3 -0.02 0.95
 -7 -13 -3 0.33 1.11
 7 13 -3 -0.72 1.08
 7 -13 3 2.48 1.05
 -7 13 3 1.15 1.06
 -7 -13 -3 0.06 0.98
 -7 14 -3 2.05 1.08
 7 -14 -3 0.2 1.18
 7 14 3 -0.29 1.08
 -7 14 -3 -0.23 0.97
 7 14 3 0.13 1.23
 -7 14 -3 0.8 1.11
 7 14 3 -0.22 1.09
 -7 -14 3 1.17 1.15
 7 -14 -3 0.16 1.08
 -7 -14 3 -0.18 1.07
 -7 14 3 -0.66 1.14
 7 -14 3 -1.91 1.01
 -7 -14 -3 0.69 1.18
 7 14 -3 0.33 1.11
 7 14 -3 -0.33 1.07
 -7 -14 -3 0.84 1.21
 -7 -14 -3 -0.5 1.01
 -7 -14 -3 -0.44 0.83
 -7 14 3 -0.08 0.89
 7 14 -3 -2.19 1.1
 7 -15 -3 1.02 1.19
 7 15 3 1.01 1.28
 7 -15 -3 1.06 1.14
 -7 -15 3 2.12 1.15
 7 15 3 2.41 1.24
 -7 15 -3 1.8 1.1
 -7 -15 3 1.75 0.96
 -7 15 -3 2.87 1.21
 -7 15 -3 0.79 1.1
 -7 -15 -3 1.89 1.24
 7 -15 3 1.17 1.14
 -7 -15 -3 -0.92 1.18
 7 15 -3 2.35 1.23
 -7 -15 -3 0.19 0.97
 7 15 -3 1.86 1.17
 7 -15 3 3.01 1.04
 7 15 -3 1.13 1.15
 -7 15 3 1.78 1.22
 -7 15 3 0.61 1.04
 -7 16 -3 0.74 1.32
 -7 -16 3 0.83 1.06
 7 16 3 0.22 1.41
 -7 -16 3 1.78 1.42
 7 -16 -3 0.87 1.26
 -7 -16 3 2.91 1.26
 7 16 -3 -0.33 1.25
 7 -16 3 0.39 1.3
 -7 -16 -3 -1.49 1.3
 7 16 -3 0.32 1.33
 -7 -16 -3 0.38 1.33
 7 -16 3 -0.16 1.16
 -7 -16 -3 -1.75 1.31
 7 16 -3 2.88 1.42
 8 0 -3 -0.71 0.44
 -8 0 3 0.06 0.43
 -8 0 3 0.21 0.35
 8 0 -3 0.81 0.34
 -8 0 -3 0.25 0.38
 -8 -1 3 16.22 1
 -8 -1 3 14.24 0.71
 -8 1 -3 13.97 0.8
 -8 -1 3 13.62 0.67
 8 -1 -3 13.56 0.66
 8 -1 -3 15.03 0.9
 -8 1 -3 14.11 0.76
 -8 -1 3 14.66 0.65
 -8 -1 -3 15.12 0.82
 8 1 -3 13.26 0.82
 8 1 -3 14.66 1
 8 1 -3 14.46 0.64
 -8 1 3 13.06 0.66
 -8 1 3 14.74 0.55
 8 1 -3 13.84 0.69
 -8 1 3 13.18 0.65
 8 2 3 80.37 2.11
 8 2 3 81.84 2.24
 8 -2 -3 81.75 2.23
 -8 -2 3 80.51 2.17
 8 -2 -3 82.07 2.13
 -8 -2 3 82.75 2.16
 -8 -2 3 84.29 2.16
 -8 -2 3 87.06 2.34
 -8 -2 -3 79.45 2.1
 -8 2 3 86.31 2.2
 -8 -2 -3 83.53 2.25
 -8 2 3 82.6 2.12
 -8 2 3 80.41 2.05
 -8 2 3 80.77 2.12
 8 2 -3 86.04 2.36
 8 2 -3 78.32 2.16
 8 2 -3 84.04 2.16
 8 2 -3 80.94 2.15
 -8 -3 3 5.39 0.51
 8 3 -3 5.15 0.47
 -8 -3 -3 4.85 0.52
 8 4 3 20.2 1.03
 8 -4 -3 20.28 0.87
 -8 4 -3 19.94 0.83
 -8 -4 3 20.32 0.98
 8 4 3 18.73 0.95
 8 -4 -3 19.55 0.91
 8 4 3 19.5 0.94
 -8 -4 3 19.9 0.98
 -8 -4 3 20.43 0.97
 -8 -4 3 20.54 1.16
 8 4 -3 21.93 0.97
 8 4 -3 20.59 1.02
 8 -4 3 21.13 0.8
 8 4 -3 21.03 0.99
 -8 -4 -3 19.24 0.95
 -8 4 3 19.43 0.91
 -8 -4 -3 20.68 1.07
 -8 4 3 18.23 0.89
 8 -5 -3 2.15 0.49
 -8 5 -3 1.55 0.47
 8 5 3 1.46 0.52
 -8 -5 3 1.34 0.53
 8 5 3 1.03 0.55
 -8 -5 3 1.87 0.57
 8 5 3 1.81 0.55
 8 -5 -3 1.52 0.35
 -8 -5 3 1.85 0.55
 -8 -5 3 1.57 0.52
 -8 5 -3 1.04 0.44
 8 -5 -3 1.27 0.5
 -8 -5 -3 1.66 0.54
 -8 5 3 1.98 0.49
 8 5 -3 2.24 0.53
 -8 5 3 1.75 0.39
 8 -5 3 1.14 0.46
 -8 -5 -3 0.97 0.53
 8 5 -3 1.56 0.5
 -8 5 3 1.65 0.51
 8 -5 3 0.69 0.46
 -8 6 -3 9.84 0.86
 -8 -6 3 10.1 0.73
 8 -6 -3 11.52 0.9
 8 6 3 11.11 0.99
 -8 -6 3 12.6 1.13
 -8 -6 3 9.38 0.75
 -8 6 -3 12.27 0.86
 8 6 3 11.71 1
 8 6 3 10.31 0.74
 8 -6 -3 10.03 0.71
 -8 6 3 10.61 0.78
 8 6 -3 12.38 0.95
 8 6 -3 10.85 0.97
 8 6 -3 12.02 0.83
 8 -6 3 9.61 0.85
 -8 -6 -3 11.12 0.98
 8 -6 3 12.19 0.88
 -8 -6 -3 9.55 0.72
 -8 6 3 10.36 0.9
 -8 6 3 10.36 0.92
 -8 -7 3 21.04 1.24
 -8 7 -3 20.78 1.09
 8 -7 -3 21.81 1.11
 8 7 3 20.96 1.19
 8 -7 -3 21.16 1.13
 -8 7 -3 22.15 1.07
 -8 -7 3 19.71 1.22
 8 -7 -3 21.79 0.87
 -8 -7 3 21.05 1.24
 8 7 3 22.32 1.26
 8 7 3 22.56 1.24
 -8 -7 3 22.74 1.32
 8 7 -3 19.06 1.24
 8 7 -3 20.98 1.2
 8 -7 3 20.47 1.1
 -8 7 3 20.94 1
 8 7 -3 21.78 1.21
 -8 7 3 20.12 1.13
 -8 -7 -3 19.85 1.2
 -8 7 3 21.81 1.11
 -8 -7 -3 23.13 1.25
 -8 -7 -3 22.91 1.2
 8 -7 3 21.37 1.09
 8 8 3 11.09 0.87
 -8 -8 3 13.62 1.21
 -8 8 -3 12.68 1.08
 -8 -8 3 13.64 1.21
 -8 8 -3 13.12 1.09
 8 -8 -3 12.36 1.11
 8 -8 -3 14.49 1.1
 -8 8 3 12.46 0.98
 8 8 -3 13.67 1.19
 -8 8 3 12.82 1.13
 -8 8 3 14.06 1.14
 -8 -8 -3 14.91 1.21
 8 -8 3 13.44 1.1
 8 9 3 1.79 0.8
 8 -9 -3 2.03 0.71
 8 9 3 2.8 0.79
 -8 -9 3 2.52 0.77
 8 -9 -3 1.86 0.38
 -8 -9 3 1.87 0.69
 -8 -9 3 2.37 0.84
 -8 9 -3 1.22 0.7
 8 -9 -3 1.37 0.78
 -8 -9 3 1.08 0.77
 8 9 3 3.01 0.83
 -8 9 -3 2.26 0.76
 -8 9 3 2.44 0.71
 -8 9 3 2.99 0.75
 -8 -9 -3 1.91 0.78
 8 9 -3 2.34 0.81
 -8 -9 -3 2.03 0.79
 8 -9 3 2.01 0.73
 -8 9 3 2.83 0.66
 8 -9 3 2.43 0.73
 8 9 -3 2.26 0.72
 8 9 -3 2.29 0.82
 -8 -10 3 12.13 1.05
 8 -10 -3 10.46 1.45
 -8 10 -3 11.1 0.92
 8 10 3 13.16 1.08
 8 10 3 11.37 1.08
 -8 10 -3 13.98 1.02
 8 -10 -3 14.1 0.99
 -8 10 -3 12.59 0.96
 -8 -10 3 11.38 1.01
 -8 -10 3 10.69 0.94
 -8 -10 3 11.47 1.01
 8 -10 -3 11.58 0.77
 8 10 -3 11.86 0.95
 -8 10 3 12.38 0.99
 8 10 -3 12.75 1.02
 -8 -10 -3 11.87 1.08
 8 -10 3 12.54 0.96
 -8 -10 -3 12.44 1.02
 8 10 -3 13.14 1.12
 -8 -10 -3 13.83 1.13
 -8 10 3 12.68 0.99
 8 -10 3 13.12 1.05
 8 11 3 4.91 0.92
 -8 -11 3 5.06 1.09
 -8 -11 3 3.43 0.97
 -8 11 -3 5.5 0.9
 -8 11 -3 4.74 0.85
 8 11 3 4.97 0.96
 8 -11 -3 6.44 1
 8 11 3 6.44 1.06
 -8 -11 3 5.26 0.95
 -8 -11 3 5.26 1.38
 -8 11 -3 5.1 0.96
 -8 11 3 5.5 0.8
 8 11 -3 5.25 0.93
 8 -11 3 6.29 0.99
 -8 11 3 3.9 0.94
 -8 -11 -3 6.97 0.97
 -8 -11 -3 5.55 0.99
 8 11 -3 5.35 0.91
 -8 11 3 3.98 0.91
 8 11 -3 6.8 1
 -8 -11 -3 5.42 0.82
 8 -11 3 5.7 0.94
 -8 -11 -3 5.05 0.96
 -8 -12 3 3.25 1.02
 -8 -12 3 3.44 0.83
 8 12 3 1.83 0.96
 -8 12 -3 2.37 0.93
 8 -12 -3 2.97 0.92
 -8 12 -3 3.52 0.94
 8 12 3 4.22 1.01
 8 12 3 5.17 1.08
 -8 -12 -3 3.45 1.03
 -8 12 3 3.72 0.95
 8 12 -3 3.12 1.01
 8 12 -3 1.21 0.95
 8 -12 3 1.71 0.97
 8 12 -3 4.6 0.95
 -8 -12 -3 2.68 0.95
 -8 -12 -3 3.9 0.95
 -8 12 3 2.61 0.83
 8 -13 -3 4.61 1.04
 -8 13 -3 4.7 1.06
 -8 13 -3 2.4 1
 8 13 3 4.87 1.06
 8 13 3 4.29 1.06
 -8 -13 3 4.79 0.94
 8 13 3 2.59 1.14
 8 -13 -3 4.26 1
 -8 -13 3 5.47 1.2
 -8 -13 -3 5.11 1.04
 8 -13 3 4.98 1.12
 -8 13 3 3.99 1.1
 -8 13 3 2.37 1.05
 8 -13 3 4.35 1.09
 -8 -13 -3 3.53 0.88
 8 13 -3 2.91 1.2
 -8 -13 -3 3.43 1.1
 -8 -13 -3 4.49 1.14
 -8 13 3 6.06 1.09
 8 13 -3 4.59 1.13
 8 -14 -3 6.58 1.21
 -8 14 -3 8.86 1.21
 8 14 3 9.35 1.21
 -8 -14 3 8.1 1.26
 -8 14 -3 9.96 1.24
 -8 14 -3 8.55 1.14
 8 14 3 8.2 1.21
 -8 -14 3 8.78 1.37
 -8 -14 3 7.45 1.03
 8 14 3 9.09 1.59
 8 14 -3 5.75 1.19
 -8 -14 -3 9.04 1.25
 -8 -14 -3 7.38 1.2
 8 -14 3 9.07 1.18
 8 14 -3 6.33 1.27
 -8 14 3 6.29 1.04
 -8 -14 -3 10.64 1.37
 8 14 -3 5.64 1.29
 -8 -14 -3 8.35 1.1
 8 -14 3 10.17 1.24
 -8 15 -3 -0.86 1.19
 8 15 3 -1.31 1.29
 -8 15 -3 1.26 1.22
 -8 -15 3 1 1.32
 8 15 3 0.31 1.05
 -8 -15 3 -1.7 1.19
 -8 15 -3 -0.53 1.06
 8 15 -3 0.3 1.2
 8 15 -3 -1.63 1.23
 8 -15 3 1.51 1.18
 -8 -15 -3 -0.06 1.23
 8 -15 3 1.03 1.08
 -8 -15 -3 0.24 1.01
 -8 -15 -3 1.95 1.41
 -8 15 3 -0.73 0.99
 8 15 -3 0 1.16
 -8 15 3 1.72 1.28
 8 16 3 0.63 1.46
 -8 -16 3 2.56 1.31
 -8 16 3 1.94 1.39
 8 16 -3 0.25 1.5
 8 -16 3 1.43 1.48
 9 0 -3 -0.22 0.33
 -9 0 3 0.17 0.35
 9 0 -3 0.32 0.46
 -9 0 -3 -0.02 0.38
 -9 0 3 0.22 0.43
 -9 0 3 0.29 0.33
 -9 0 -3 1.01 0.41
 -9 -1 3 0.99 0.46
 9 -1 -3 1.48 0.45
 -9 -1 3 1.17 0.33
 -9 1 -3 2.16 0.41
 -9 -1 3 2.02 0.38
 -9 -1 -3 1.88 0.45
 9 1 -3 1.35 0.48
 -9 -1 -3 1.19 0.44
 -9 1 3 1.26 0.27
 -9 -2 3 5.16 0.57
 -9 -2 3 6.59 0.5
 9 2 3 6.36 0.37
 -9 -2 3 6.71 0.48
 -9 2 -3 5.44 0.45
 9 -2 -3 6.67 0.45
 9 2 3 6.64 0.55
 -9 -2 -3 5.98 0.53
 -9 2 3 6.67 0.43
 -9 -2 -3 7.09 0.53
 -9 -2 -3 5.43 0.54
 9 2 -3 6.67 0.49
 9 2 -3 6.07 0.47
 9 2 -3 5.84 0.45
 -9 2 3 5.66 0.44
 9 2 -3 5.52 0.6
 -9 2 3 5.82 0.44
 9 3 3 17.59 0.98
 -9 -3 3 18.59 1.15
 -9 3 -3 18.6 0.79
 9 3 3 19.56 0.81
 -9 -3 3 17.23 0.86
 9 -3 -3 17.6 0.93
 -9 -3 3 18.68 0.91
 -9 -3 3 17.86 0.91
 9 3 -3 17.86 0.9
 -9 3 3 17.62 0.77
 -9 3 3 18.35 0.81
 -9 -3 -3 19.56 0.99
 -9 -3 -3 18.65 0.81
 9 3 -3 18.45 0.87
 -9 3 3 19.51 0.86
 9 3 -3 16.86 0.86
 -9 -3 -3 17.93 0.81
 -9 4 -3 12.46 0.66
 9 4 3 12.09 0.83
 9 -4 -3 14.16 0.81
 -9 -4 3 13.15 0.88
 -9 -4 3 13.27 1.09
 -9 4 -3 13.69 0.66
 9 -4 -3 13.63 0.83
 -9 4 -3 12.81 0.69
 9 4 3 14.8 0.84
 9 -4 -3 13.21 0.77
 -9 -4 3 15.04 0.89
 -9 -4 3 14.81 0.87
 9 4 3 13.33 0.93
 -9 -4 -3 14.49 0.83
 -9 -4 -3 14.16 0.84
 9 4 -3 13.78 0.93
 9 4 -3 13.94 0.88
 -9 4 3 14.95 0.75
 -9 -4 -3 13.87 0.98
 9 -4 3 12.14 0.65
 9 -4 3 12.19 0.59
 9 4 -3 15.21 0.88
 -9 4 3 12.78 0.79
 -9 4 3 13.21 0.77
 -9 -5 3 29 1.19
 -9 -5 3 30.34 1.2
 9 -5 -3 27.32 1.07
 -9 -5 3 28.07 1.37
 9 5 3 30.22 1.26
 9 -5 -3 30.27 1.07
 -9 -5 3 27.33 1.21
 9 5 3 31.03 1.16
 -9 5 -3 29.32 1.04
 9 5 3 30.33 1.16
 9 -5 -3 30.03 1.12
 -9 5 -3 29.85 1.02
 -9 -5 -3 28.29 1.27
 9 5 -3 27.58 1.18
 -9 -5 -3 27.88 1.15
 -9 5 3 30.94 0.99
 -9 -5 -3 28.8 1.17
 -9 5 3 27.88 1
 9 -5 3 29.81 1.04
 9 5 -3 28.64 1.19
 -9 5 3 27.58 1.1
 -9 5 3 28.31 1.1
 9 -6 -3 0.32 0.36
 9 6 3 0.79 0.59
 9 -6 -3 0.77 0.53
 9 -6 -3 0.58 0.54
 -9 -6 3 0.62 0.6
 9 6 3 0.84 0.61
 9 6 3 1.3 0.61
 -9 6 -3 0.11 0.47
 -9 -6 3 -0.33 0.57
 -9 -6 3 0.49 0.56
 -9 6 -3 0.32 0.5
 -9 -6 3 0.07 0.59
 -9 -6 -3 -0.43 0.57
 9 6 -3 -0.08 0.57
 -9 6 3 -0.15 0.43
 -9 -6 -3 -0.6 0.57
 9 6 -3 0.05 0.54
 -9 -6 -3 -0.44 0.59
 9 -6 3 0.73 0.5
 9 6 -3 0.69 0.6
 -9 6 3 0.73 0.52
 9 -6 3 0.03 0.5
 -9 7 -3 1.24 0.56
 9 7 3 0.38 0.63
 -9 -7 3 1.19 0.67
 -9 7 -3 1.47 0.58
 -9 -7 3 1.14 0.6
 9 -7 -3 0.31 0.61
 9 7 3 0.82 0.64
 9 7 3 1.35 0.68
 9 -7 -3 1.02 0.59
 9 -7 -3 0.68 0.36
 -9 -7 3 2.21 0.66
 -9 7 3 2.06 0.61
 -9 7 3 1.42 0.5
 9 -7 3 1.45 0.58
 -9 -7 -3 0.98 0.65
 -9 -7 -3 0.38 0.65
 9 7 -3 0.84 0.66
 9 -7 3 0.39 0.57
 -9 -7 -3 0.93 0.66
 9 7 -3 0.13 0.62
 -9 7 3 0.64 0.58
 9 7 -3 0.31 0.65
 9 -8 -3 15.07 1.14
 9 -8 -3 13.01 0.77
 9 8 3 16.16 1.24
 -9 8 -3 14.76 1.11
 -9 8 -3 12.5 1.06
 9 -8 -3 13.02 1.12
 -9 -8 3 15.64 0.97
 -9 -8 3 16.11 1
 -9 -8 3 14.18 1.25
 9 8 3 14.46 1.28
 9 8 3 17.05 1.31
 -9 -8 3 13.99 0.97
 9 8 -3 14.29 1.27
 -9 -8 -3 14.18 1.27
 9 -8 3 14.4 1.13
 9 8 -3 13.82 1.24
 -9 8 3 15.29 1.03
 9 8 -3 14.61 1.27
 -9 8 3 14.71 1.19
 -9 -8 -3 14.51 1.25
 -9 8 3 15.58 0.93
 9 -8 3 12.59 1.11
 -9 -8 -3 14.51 1.27
 -9 -9 3 4.96 0.84
 -9 9 -3 6.66 0.79
 -9 -9 3 5.21 0.81
 9 9 3 5.21 0.85
 -9 -9 3 5.49 0.87
 9 -9 -3 5.04 0.8
 -9 9 -3 6.5 0.81
 9 -9 -3 5.87 0.85
 -9 -9 3 4.5 0.85
 9 9 -3 5.38 0.84
 -9 -9 -3 5.65 0.88
 -9 9 3 4.75 0.82
 9 9 -3 4.27 0.83
 9 -9 3 4.51 0.8
 -9 -9 -3 4.39 0.9
 9 9 -3 3.86 0.79
 -9 9 3 5.51 0.69
 -9 -9 -3 5.43 0.84
 -9 9 3 4.61 0.79
 -9 -9 -3 3.65 0.78
 9 -9 3 5.05 0.79
 -9 10 -3 3.09 0.78
 9 10 3 2.45 0.86
 9 10 3 3.22 0.85
 9 -10 -3 3.7 0.83
 9 10 3 3.62 0.94
 -9 -10 3 2.29 0.88
 -9 -10 3 1.49 0.85
 -9 10 -3 1.12 0.76
 -9 -10 3 0.92 0.93
 -9 10 -3 2.82 0.8
 -9 -10 3 2.52 1.26
 9 -10 -3 2.36 0.79
 9 -10 3 1.61 1.38
 9 10 -3 1.33 0.87
 -9 10 3 3.37 0.91
 9 10 -3 2.27 0.9
 -9 -10 -3 2.48 0.89
 -9 -10 -3 1.71 1.03
 -9 10 3 2.02 0.7
 -9 10 3 4.13 0.89
 9 10 -3 2.98 0.89
 9 -10 3 1 0.83
 -9 -10 -3 3.02 0.88
 -9 -10 -3 0.46 1.01
 -9 -11 3 1.07 0.92
 9 11 3 1.21 0.88
 9 11 3 0.63 0.85
 -9 11 -3 0.49 0.81
 -9 -11 3 0.94 0.91
 9 -11 -3 1.91 0.85
 -9 -11 3 0.75 0.88
 -9 11 -3 1.76 0.82
 -9 -11 3 1.43 0.78
 9 11 3 2.06 1
 -9 11 -3 1.46 0.84
 -9 -11 -3 2.11 0.91
 -9 -11 -3 0.23 0.91
 9 11 -3 2.15 0.91
 -9 -11 -3 1.47 0.78
 -9 11 3 0.63 0.71
 -9 11 3 1.04 0.87
 -9 -11 -3 1.87 0.91
 9 -11 3 -0.01 0.79
 9 11 -3 0.22 0.92
 9 -11 3 1.76 0.85
 -9 11 3 -0.29 0.83
 -9 -12 3 0.08 0.99
 -9 12 -3 -0.31 0.9
 -9 12 -3 0.57 0.91
 9 12 3 1.44 0.92
 -9 -12 3 -0.67 0.84
 -9 -12 3 0.03 0.95
 -9 -12 3 0.1 0.92
 9 12 3 2.08 1.1
 -9 12 -3 -1.15 0.84
 9 12 3 0.33 0.97
 9 -12 -3 1.1 0.91
 -9 12 3 0.19 0.97
 -9 -12 -3 1.05 0.97
 9 -12 3 -0.51 0.9
 9 -12 3 -0.55 0.87
 -9 12 3 1.8 1
 -9 -12 -3 -0.68 0.79
 9 12 -3 -0.75 0.98
 9 12 -3 1.16 0.94
 -9 -12 -3 1.97 1.05
 9 12 -3 0.83 1.08
 -9 12 3 0.41 0.79
 -9 -12 -3 0.85 0.97
 -9 -13 3 2.08 1.14
 -9 13 -3 1.98 0.97
 -9 13 -3 0.98 1.06
 9 -13 -3 0.86 1
 9 13 3 2.92 0.98
 9 13 3 2.75 1.18
 -9 -13 3 1.33 1.66
 -9 13 -3 1.54 0.95
 9 13 3 3.86 1.1
 -9 -13 3 0.96 0.87
 9 13 -3 2.19 1.06
 9 -13 3 1.29 0.97
 -9 -13 -3 2.23 0.89
 -9 13 3 3.13 1.08
 -9 -13 -3 1.58 1.08
 9 13 -3 0.14 0.99
 -9 13 3 1.49 1.06
 -9 13 3 2.74 1.11
 -9 -13 -3 2.4 1.12
 -9 14 -3 0.38 1.02
 -9 -14 3 -0.59 1.11
 9 14 3 -0.24 1.09
 -9 14 -3 0.57 1.06
 -9 -14 3 -1.06 1.21
 9 -14 -3 -1.6 1.08
 -9 -14 3 2.04 0.97
 9 14 3 -0.93 1.12
 -9 14 -3 2.03 1.02
 -9 -14 -3 0.75 1.13
 9 14 -3 2.11 1.18
 9 -14 3 1.75 1.1
 -9 -14 -3 -0.7 1.05
 -9 -14 -3 1.06 0.95
 -9 14 3 -0.57 1.11
 -9 14 3 -0.51 1.07
 9 14 -3 -2.21 1.13
 -9 -14 -3 0.6 1.06
 9 -14 3 0.69 1.09
 9 14 -3 0.07 1.09
 -9 -15 3 1.02 1.42
 -9 -15 3 1.75 1.03
 9 15 3 1.54 1.42
 -9 15 -3 1.23 1.19
 9 15 3 2.16 1.11
 9 15 3 -0.31 1.25
 9 -15 -3 1.47 1.25
 -9 -15 3 1.93 1.21
 9 -15 -3 -0.8 1.24
 -9 15 -3 -0.02 1.13
 -9 15 3 1.48 1.31
 -9 -15 -3 0.16 1.09
 -9 -15 -3 1.35 1.21
 -9 15 3 1.45 1.31
 9 -15 3 1.99 1.22
 -9 -15 -3 1.51 1.24
 -9 -15 -3 2.83 1.32
 9 15 -3 1.39 1.21
 9 15 -3 -0.45 1.26
 9 15 -3 3.7 1.34
 -9 15 3 1.21 1.01
 -10 0 3 0.31 0.46
 10 0 -3 0.13 0.33
 10 0 -3 0.15 0.47
 10 0 -3 0.21 0.17
 -10 0 -3 0.64 0.42
 -10 0 3 -0.1 0.34
 -10 -1 3 3.03 0.51
 10 -1 -3 2.9 0.49
 -10 -1 3 3.29 0.37
 -10 1 3 2.15 0.31
 -10 -1 -3 2.28 0.5
 -10 2 -3 71.78 2.04
 10 2 3 74.87 2.09
 10 -2 -3 77.15 2.13
 10 -2 -3 76.38 1.94
 -10 -2 3 75.29 1.97
 -10 2 -3 74.47 2.03
 -10 -2 3 74.24 1.99
 -10 -2 3 74.73 2.22
 -10 -2 3 72.55 2
 10 2 -3 73.35 2.01
 -10 -2 -3 74.14 2.23
 -10 -2 -3 75.55 2.1
 -10 2 3 71.77 1.93
 10 2 -3 75.58 1.98
 -10 2 3 71.75 1.89
 10 2 -3 73.64 1.99
 -10 -3 3 42.16 1.38
 -10 -3 3 43.79 1.61
 10 -3 -3 43.51 1.43
 -10 -3 3 43.17 1.37
 -10 3 -3 41.6 1.33
 10 -3 -3 44.77 1.29
 -10 -3 3 43.99 1.34
 10 3 3 42.36 1.45
 10 3 -3 44.62 1.38
 10 3 -3 43.66 1.34
 -10 -3 -3 41.66 1.27
 10 3 -3 44.5 1.36
 -10 3 3 45.06 1.37
 -10 3 3 45.25 1.29
 -10 3 3 41.1 1.19
 -10 -3 -3 44.5 1.48
 -10 3 3 42.82 1.26
 -10 -4 3 39.12 1.32
 -10 4 -3 41.61 1.2
 -10 -4 3 41.21 1.38
 10 -4 -3 38.97 1.25
 10 -4 -3 38.9 1.31
 10 4 3 39.37 1.28
 10 4 3 39.8 1.28
 -10 -4 3 42.41 1.58
 10 4 3 40.39 1.42
 -10 -4 3 38.5 1.35
 -10 4 3 38.86 1.26
 10 4 -3 38.48 1.33
 -10 4 3 39.4 1.23
 -10 4 3 39.89 1.25
 -10 -4 -3 39.95 1.57
 -10 -4 -3 38.12 1.27
 10 4 -3 40.42 1.34
 -10 -4 -3 40.06 1.45
 -10 -4 -3 37.43 1.28
 -10 -5 3 62.04 1.89
 -10 -5 3 64.39 1.87
 10 -5 -3 62.1 1.8
 10 -5 -3 61.87 1.78
 -10 -5 3 62.83 1.92
 10 5 3 63.29 1.84
 10 5 3 61.8 1.85
 -10 -5 3 66.59 2.08
 10 -5 -3 64.47 1.8
 10 5 3 63.83 1.96
 -10 5 -3 60.68 1.73
 10 5 -3 63.67 1.88
 -10 -5 -3 64.74 2.09
 -10 5 3 61.54 1.75
 10 -5 3 64.38 1.72
 -10 -5 -3 65.63 1.85
 -10 5 3 61.65 1.8
 10 5 -3 62.57 1.89
 -10 -5 -3 62.22 1.84
 10 5 -3 63.85 1.9
 -10 -5 -3 63.13 1.97
 -10 5 3 60.82 1.79
 10 6 3 12.97 1.03
 10 6 3 13.49 1.05
 -10 6 -3 14.99 0.89
 10 -6 -3 13.47 0.92
 -10 -6 3 14.41 1.08
 -10 6 -3 14.16 0.87
 10 -6 -3 13.99 0.97
 -10 -6 3 14.31 1.1
 10 6 3 15.47 1.15
 10 -6 -3 13.85 0.84
 10 6 -3 15.42 1.06
 -10 -6 -3 16.76 1.19
 10 -6 3 14.55 0.9
 -10 -6 -3 13.33 1.03
 10 6 -3 13.69 1.12
 -10 6 3 12.62 0.84
 -10 -6 -3 16.24 1.3
 -10 -6 -3 13.24 1.03
 10 6 -3 15.48 1.07
 -10 6 3 12.97 0.96
 -10 -7 3 4.18 0.73
 -10 -7 3 4.74 0.72
 -10 -7 3 5.23 0.72
 10 7 3 4.43 0.72
 -10 7 -3 3.85 0.61
 10 -7 -3 4.09 0.43
 -10 -7 3 2.97 0.64
 10 -7 -3 4.53 0.68
 10 7 3 4.35 0.7
 -10 7 -3 4.58 0.63
 10 -7 -3 5.03 0.65
 10 7 3 4.43 0.73
 -10 7 3 3.05 0.62
 -10 -7 -3 3.74 0.73
 10 7 -3 3.08 0.74
 -10 -7 -3 3.97 0.72
 -10 -7 -3 2.9 0.69
 10 7 -3 5.37 0.71
 10 -7 3 3.67 0.59
 10 7 -3 4.25 0.72
 -10 7 3 3.52 0.64
 -10 7 3 3.53 0.54
 10 -7 3 4.14 0.64
 -10 -7 -3 2.62 0.72
 -10 -8 3 4.65 0.78
 10 -8 -3 2.47 0.41
 -10 -8 3 2.57 0.77
 -10 8 -3 3.16 0.66
 10 8 3 4.82 0.83
 10 -8 -3 3.4 0.72
 -10 -8 3 4.02 0.78
 10 8 3 4.75 0.78
 10 -8 -3 3.86 0.71
 -10 8 -3 3.73 0.7
 10 8 3 4.09 0.75
 -10 -8 3 3.05 0.76
 -10 8 3 3.66 0.72
 -10 8 3 3.85 0.69
 -10 -8 -3 2.53 0.74
 10 -8 3 2.84 0.67
 10 8 -3 2.75 0.78
 -10 -8 -3 2.13 0.73
 -10 -8 -3 2.36 0.8
 10 8 -3 3.28 0.79
 -10 -8 -3 4.02 0.81
 10 -8 3 2.79 0.67
 -10 8 3 2.58 0.6
 10 8 -3 4.39 0.76
 -10 9 -3 13.22 0.93
 10 -9 -3 13.93 0.95
 -10 -9 3 15.45 1.09
 10 -9 -3 13.88 1.23
 10 9 3 11.91 1.24
 10 9 3 12.39 1.16
 -10 9 -3 13.52 0.9
 -10 -9 3 12.12 1.16
 10 9 3 14.27 1.05
 -10 -9 3 12.5 1.04
 -10 -9 3 13.21 1.03
 -10 9 3 13.4 0.95
 10 9 -3 12.35 1
 -10 9 3 14.29 1.27
 10 -9 3 12.66 0.91
 10 9 -3 12.89 0.98
 10 -9 3 13.88 1.17
 -10 -9 -3 14.56 1.07
 -10 -9 -3 13.03 0.99
 -10 -9 -3 12.64 1
 -10 9 3 12.24 0.83
 10 9 -3 12.88 0.99
 10 10 3 -0.33 0.93
 10 -10 -3 1.03 0.82
 -10 -10 3 -0.57 0.84
 -10 -10 3 1.14 1.03
 -10 10 -3 0.78 0.83
 10 10 3 1.44 0.86
 -10 -10 3 -0.57 0.84
 10 -10 -3 -0.05 0.81
 -10 10 -3 0.95 0.76
 10 10 3 1.33 0.84
 -10 10 3 1.71 0.83
 10 -10 3 2.08 0.81
 -10 -10 -3 0.9 0.84
 10 -10 3 1.38 0.77
 10 10 -3 0.95 0.92
 -10 10 3 2.15 0.69
 -10 -10 -3 0.82 0.86
 -10 10 3 1.14 0.92
 -10 -10 -3 0.7 0.9
 10 10 -3 0.38 0.84
 10 10 -3 2.08 1.02
 -10 11 -3 1.59 0.85
 -10 -11 3 2 0.91
 10 11 3 0.27 0.95
 -10 11 -3 2.34 0.84
 -10 -11 3 2.08 0.86
 -10 -11 3 0.74 0.99
 10 11 3 0.73 1.04
 -10 11 -3 2.77 0.85
 10 11 3 1.07 0.85
 10 -11 -3 2.2 0.87
 -10 11 3 1.66 0.76
 10 11 -3 2.2 0.93
 -10 11 3 0.43 0.9
 -10 -11 -3 0.25 1
 -10 -11 -3 2.49 1
 -10 -11 -3 0.53 0.87
 10 11 -3 2.16 0.91
 -10 11 3 3.73 0.91
 -10 -11 -3 1.31 1.01
 10 11 -3 1.53 0.93
 10 -11 3 2.51 0.85
 10 -11 3 1.43 0.86
 -10 -12 3 3.92 1.05
 -10 12 -3 3 0.95
 10 -12 -3 3.09 1.02
 10 -12 -3 3.14 1.02
 -10 -12 3 1.66 0.86
 10 12 3 3.24 1.08
 10 12 3 1.77 1.02
 -10 -12 3 2.52 1.12
 -10 -12 3 3.52 1.05
 10 12 3 3.88 0.99
 10 -12 3 2.86 0.92
 10 -12 3 4.11 0.97
 -10 -12 -3 2.64 1.05
 -10 -12 -3 2.63 0.89
 10 12 -3 2.63 1.05
 -10 12 3 4.51 1.01
 10 12 -3 3.99 1.06
 -10 -12 -3 2.52 1.07
 -10 12 3 4.12 1
 -10 -12 -3 2.97 1.02
 10 13 3 1.07 1.1
 -10 -13 3 0.94 0.95
 10 -13 -3 2.48 1
 10 13 3 0.07 1.13
 -10 13 -3 3.16 1.05
 10 -13 -3 2.57 1.04
 -10 13 -3 0.89 0.96
 -10 13 -3 2.21 1.04
 -10 -13 3 1.61 1.13
 10 13 -3 2.44 1.1
 10 -13 3 1.52 0.98
 -10 -13 -3 1.55 1.07
 10 13 -3 0.7 1.03
 -10 13 3 2.08 1.04
 -10 -13 -3 0.95 1.06
 -10 13 3 2.73 1.02
 10 -13 3 3 1.03
 -10 13 3 1.49 1.03
 -10 -13 -3 1.48 1.05
 -10 -13 -3 0.58 0.95
 10 14 3 -0.14 1.32
 -10 -14 3 3.51 1.33
 -10 14 -3 -1.09 1.05
 10 -14 -3 -0.73 1.13
 -10 14 -3 1.86 1.09
 -10 -14 3 1.96 1.1
 10 14 3 0.93 1.17
 10 -14 -3 2.59 1.1
 -10 14 -3 3.3 1.12
 -10 -14 -3 2.56 1.22
 10 14 -3 2.93 1.14
 10 14 -3 1.23 1.2
 -10 14 3 2.29 1.13
 -10 14 3 1.35 1.12
 10 -14 3 0.19 1.01
 -10 -14 -3 0.79 1.26
 10 14 -3 0.52 1.12
 -10 -14 -3 0.94 1.11
 -10 -14 -3 -0.16 1.05
 10 -15 -3 -0.82 1.31
 10 15 3 0.71 1.36
 -10 -15 3 0.78 1.11
 10 -15 -3 3.14 1.24
 10 15 3 -1.35 1.22
 -10 15 -3 1.55 1.2
 10 15 3 3.46 1.42
 -10 -15 3 1.41 1.37
 -10 -15 3 3.16 1.29
 -10 15 -3 0.47 1.24
 -10 -15 -3 -1.22 1.07
 -10 -15 -3 1.79 1.37
 -10 15 3 1.12 1.01
 10 15 -3 0.27 1.32
 10 -15 3 3.52 1.21
 -10 -15 -3 1.54 1.23
 10 15 -3 0.85 1.27
 -10 15 3 0.54 1.23
 11 0 -3 0.62 0.35
 -11 0 3 1.09 0.48
 -11 0 -3 0.37 0.41
 11 0 -3 0.86 0.54
 11 0 -3 0.94 0.33
 -11 0 3 0.12 0.36
 -11 0 -3 1.52 0.45
 -11 0 3 0.53 0.33
 11 -1 -3 8.42 0.63
 -11 -1 3 8.77 0.67
 -11 -1 3 8.75 0.66
 11 -1 -3 9.92 0.55
 -11 1 -3 9.16 0.82
 -11 1 -3 9.2 0.73
 -11 -1 3 8.36 0.65
 11 1 -3 9.87 0.7
 -11 1 3 8.27 0.59
 -11 -1 -3 10.41 0.84
 -11 -1 -3 8.55 0.63
 11 1 -3 8.47 0.61
 11 2 3 11.39 0.88
 -11 -2 3 10.38 0.72
 -11 -2 3 11.92 0.76
 -11 2 -3 12.29 0.85
 11 -2 -3 11.96 1
 11 -2 -3 10.89 0.65
 -11 -2 3 10.19 0.69
 -11 2 -3 10.92 0.76
 -11 2 3 10.33 0.58
 -11 2 3 10.51 0.64
 -11 -2 -3 10.52 0.7
 11 2 -3 10.89 0.7
 -11 2 3 12.97 0.93
 11 2 -3 12.33 0.74
 -11 -3 3 7.06 0.58
 -11 -3 3 5.89 0.65
 -11 -3 3 6.47 0.56
 11 3 3 5.18 0.6
 11 -3 -3 5.55 0.55
 -11 3 -3 6.24 0.48
 11 3 -3 6.98 0.54
 -11 -3 -3 5.36 0.64
 -11 3 3 6.8 0.51
 11 3 -3 6.8 0.55
 11 3 -3 7.59 0.59
 -11 3 3 5.68 0.5
 -11 -3 -3 7.78 0.65
 -11 -3 -3 6.39 0.69
 -11 -3 -3 6.99 0.63
 11 -4 -3 21.23 0.91
 -11 -4 3 22.8 1.33
 -11 -4 3 20.83 1.08
 11 4 3 20.04 0.92
 -11 4 -3 20.14 0.88
 11 -4 -3 20.94 1.04
 -11 -4 3 19.23 1
 11 4 3 18.85 1.12
 11 4 -3 20.01 0.99
 -11 -4 -3 19.86 0.93
 -11 -4 -3 21.58 1.34
 -11 -4 -3 19.58 0.91
 11 4 -3 21.67 1.02
 -11 4 3 18.87 0.86
 -11 -4 -3 20.52 1.16
 -11 4 3 20.54 0.89
 -11 4 3 17.95 0.94
 -11 5 -3 3.11 0.44
 11 -5 -3 2.93 0.46
 -11 -5 3 4 0.62
 -11 -5 3 3.62 0.6
 11 -5 -3 3.51 0.5
 11 5 3 3.56 0.64
 -11 5 -3 3.69 0.43
 -11 -5 3 2.99 0.6
 11 5 3 3.13 0.56
 -11 -5 3 2.33 0.67
 11 5 3 3.59 0.57
 11 -5 -3 2.88 0.52
 -11 -5 -3 4.02 0.57
 -11 5 3 3.3 0.51
 -11 5 3 3.11 0.41
 11 5 -3 2.42 0.63
 -11 -5 -3 3.15 0.64
 -11 5 3 2.75 0.51
 -11 -5 -3 3.43 0.58
 11 5 -3 3.02 0.57
 -11 -6 3 2.39 0.66
 -11 -6 3 2.66 0.68
 11 -6 -3 2.2 0.57
 -11 -6 3 1.36 0.71
 11 6 3 3.03 0.66
 11 6 3 2.71 0.63
 11 -6 -3 2.77 0.45
 -11 6 -3 2.4 0.54
 -11 -6 3 2.97 0.65
 -11 6 -3 2.73 0.52
 11 -6 -3 3.15 0.61
 11 6 -3 1.29 0.68
 -11 -6 -3 2.52 0.62
 -11 6 3 2.17 0.58
 -11 6 3 2.63 0.48
 -11 6 3 3.14 0.57
 -11 -6 -3 3.73 0.71
 11 -6 3 1.94 0.52
 11 6 -3 2.99 0.69
 11 6 -3 2.79 0.63
 -11 -6 -3 3.86 0.65
 -11 6 3 3.14 0.4
 -11 7 -3 21.31 1.09
 11 7 3 21.82 1.36
 11 7 3 20.73 1.25
 -11 7 -3 20.61 1.08
 -11 -7 3 23.25 1.39
 11 -7 -3 21.24 0.99
 -11 -7 3 23.56 1.52
 -11 -7 3 22.51 1.29
 11 7 3 22.09 1.31
 11 -7 -3 23.46 1.17
 -11 -7 3 22.33 1.33
 11 -7 -3 20.3 1.14
 -11 7 3 22.05 1.15
 -11 7 3 21.41 1.06
 11 -7 3 20.41 1.04
 -11 -7 -3 21.32 1.38
 -11 -7 -3 23.64 1.24
 -11 -7 -3 22.63 1.25
 11 7 -3 23.76 1.34
 11 7 -3 21.97 1.33
 11 -7 3 21.71 1.1
 -11 7 3 22.19 1.16
 -11 -7 -3 23.47 1.58
 11 7 -3 22.87 1.26
 -11 -8 3 9.14 0.93
 -11 -8 3 11.57 0.95
 11 8 3 12.37 0.91
 -11 -8 3 11.26 0.94
 -11 8 -3 12.27 0.82
 11 8 3 10.6 0.95
 -11 -8 3 12.36 1.27
 11 -8 -3 12.38 0.86
 11 -8 -3 11.8 0.86
 -11 8 -3 11.75 0.82
 11 8 3 11.61 0.95
 -11 8 3 11.05 0.85
 11 -8 3 10.52 0.78
 11 8 -3 10.29 1
 -11 -8 -3 13.07 1
 -11 8 3 11.53 0.84
 11 8 -3 11.8 0.94
 -11 -8 -3 12.07 0.94
 -11 -8 -3 11.55 0.92
 11 8 -3 10.49 0.91
 -11 8 3 10.41 0.74
 11 -8 3 10.9 0.81
 -11 -9 3 5.18 0.89
 11 9 3 4.94 0.9
 11 -9 -3 4.4 1.23
 -11 -9 3 6.54 0.92
 11 -9 -3 6.54 0.83
 -11 -9 3 4.45 0.88
 11 9 3 5.75 0.92
 -11 9 -3 6.23 0.81
 11 9 3 5.97 0.86
 -11 -9 3 5.68 0.89
 -11 9 -3 5.2 0.77
 11 9 -3 5.99 0.88
 11 9 -3 6.86 0.97
 -11 -9 -3 4.7 0.83
 11 9 -3 5.03 0.89
 -11 -9 -3 5.96 1.46
 -11 -9 -3 4.77 1.08
 -11 9 3 5.57 0.8
 11 -9 3 4.21 0.74
 -11 9 3 5.55 0.71
 -11 -9 -3 4.74 0.84
 11 -9 3 6.5 0.81
 -11 -10 3 5.47 0.98
 -11 -10 3 5.49 0.92
 -11 10 -3 7.46 0.88
 -11 -10 3 5.82 0.98
 -11 10 -3 6.4 1.09
 11 10 3 4.49 0.91
 11 10 3 7.11 1.03
 -11 -10 3 4.18 0.92
 11 10 -3 5.51 0.94
 -11 -10 -3 4.31 0.9
 -11 10 3 6.76 0.79
 11 -10 3 5.75 0.87
 -11 10 3 6.43 0.95
 -11 10 3 5.3 0.89
 11 -10 3 4.98 0.84
 11 10 -3 4.98 0.98
 -11 -10 -3 5.81 0.96
 -11 11 -3 0.65 1.38
 -11 11 -3 2.27 0.83
 -11 -11 3 2.14 0.95
 11 11 3 3.71 0.95
 11 11 3 3.46 1.03
 -11 -11 3 1.16 0.98
 -11 -11 3 1.2 0.94
 11 -11 -3 2.65 0.93
 11 11 -3 2.29 0.98
 11 11 -3 1.9 0.91
 11 -11 3 1.97 0.87
 -11 -11 -3 1.02 0.88
 11 -11 3 0.53 0.81
 -11 11 3 1.56 0.76
 -11 -11 -3 0.77 0.95
 11 11 -3 2.79 0.99
 -11 -11 -3 3.58 1.04
 -11 -12 3 0.05 1.02
 11 12 3 -0.87 1.02
 -11 -12 3 -0.97 1
 11 -12 -3 1.68 0.91
 -11 12 -3 1.69 0.94
 -11 -12 3 0.6 1.11
 11 12 3 1.08 0.96
 11 -12 -3 1.35 1.03
 11 12 3 1.18 1.02
 -11 -12 3 0.57 0.91
 -11 12 -3 0.2 0.93
 -11 -12 -3 1.47 0.99
 11 12 -3 -0.84 1
 11 -12 3 0.3 0.95
 -11 -12 -3 0.2 0.9
 -11 -12 -3 1.96 0.99
 -11 -12 -3 1.4 1.07
 -11 12 3 0.9 0.93
 -11 12 3 2.17 1.01
 -11 -13 3 1.7 1.21
 -11 -13 3 1.54 0.97
 11 13 3 -0.47 1.26
 11 -13 -3 -0.38 1.02
 -11 13 -3 0 0.99
 11 13 3 1.29 0.93
 11 -13 -3 2.53 1.12
 -11 13 -3 3.59 1.08
 11 13 3 1.19 1.05
 -11 -13 3 1.51 1.16
 -11 13 3 0.98 1.13
 11 -13 3 1.67 1.07
 -11 -13 -3 2.57 1.09
 11 -13 3 1.48 0.95
 -11 13 3 3.11 1.15
 -11 13 3 -0.3 0.98
 -11 -13 -3 2.6 1.19
 -11 -13 -3 0.46 1.1
 -11 -13 -3 0.01 1.05
 11 13 -3 1.5 1.09
 11 13 -3 1.95 1.16
 11 14 3 0.68 1.05
 11 14 3 2.38 1.24
 11 -14 -3 3.54 1.16
 -11 -14 3 2.07 1.15
 -11 14 -3 1.02 1.1
 -11 -14 3 0.91 1.15
 11 14 3 0.55 1.39
 11 -14 -3 1.39 1.11
 11 -14 3 3.84 1.14
 -11 -14 -3 4.25 1.21
 -11 14 3 2.68 1.25
 -11 -14 -3 1.64 1.02
 -11 14 3 1.9 1.14
 -11 -14 -3 2.34 1.29
 11 14 -3 1.06 1.23
 -11 -14 -3 2.95 1.15
 11 14 -3 2.68 1.32
 -12 0 -3 1.16 0.46
 -12 0 3 0.61 0.51
 -12 -1 3 42.96 1.63
 -12 1 -3 42.85 1.36
 -12 -1 3 39.36 1.26
 -12 -1 3 42.65 1.29
 -12 1 -3 43.49 1.45
 -12 -1 3 41.82 1.27
 -12 -1 -3 45.22 1.56
 -12 1 3 41.06 1.23
 12 1 -3 40.94 1.23
 -12 1 3 45.1 1.52
 -12 -1 -3 42.47 1.42
 12 -2 -3 1.79 0.54
 -12 -2 3 2.82 0.42
 -12 -2 3 2.78 0.6
 -12 2 -3 1.73 0.46
 -12 2 -3 1.64 0.44
 -12 2 3 2.41 0.49
 12 2 -3 2.29 0.45
 -12 -2 -3 2.5 0.56
 12 2 -3 2.29 0.43
 -12 -3 3 56.29 1.66
 -12 3 -3 54.98 1.69
 -12 3 -3 54.38 1.65
 -12 -3 3 53.94 1.61
 12 3 3 57.52 1.79
 -12 -3 3 59.37 1.7
 -12 -3 3 57.14 1.97
 -12 3 3 56.15 1.51
 12 3 -3 55.37 1.62
 -12 -3 -3 55.2 1.93
 -12 3 3 55.18 1.73
 -12 -3 -3 59.44 1.81
 -12 3 3 53.49 1.53
 -12 -3 -3 55.74 1.54
 12 3 -3 56.02 1.68
 -12 4 -3 9.83 0.8
 -12 -4 3 9.47 0.84
 12 4 3 11.85 0.78
 12 4 3 10.23 0.78
 -12 -4 3 10.77 0.95
 12 -4 -3 10.3 0.65
 12 -4 -3 10.21 0.75
 -12 -4 3 11.57 0.68
 12 4 -3 11.81 0.93
 -12 -4 -3 9.76 0.81
 -12 4 3 9.47 0.71
 -12 -4 -3 9.67 0.77
 -12 -4 -3 12.04 0.82
 -12 4 3 9.82 0.62
 -12 -4 -3 10.26 0.8
 12 4 -3 11.38 0.91
 -12 4 3 9.47 0.6
 12 4 -3 11.25 0.87
 -12 5 -3 10.86 0.74
 12 -5 -3 10.9 0.98
 12 5 3 12.03 0.93
 -12 -5 3 12.66 0.8
 -12 -5 3 13.65 0.78
 -12 -5 3 11.4 0.86
 12 5 3 12.27 0.96
 12 5 3 12.8 0.85
 12 5 -3 13.88 1.06
 -12 -5 -3 12.58 0.91
 -12 5 3 11.05 0.85
 12 5 -3 12.65 0.82
 -12 -5 -3 14.66 1.18
 -12 -5 -3 11.69 0.94
 12 5 -3 12.27 0.99
 -12 5 3 13.54 0.84
 -12 5 3 12.1 0.86
 -12 -6 3 2.01 0.65
 12 6 3 1.06 0.64
 -12 -6 3 0.6 0.68
 12 6 3 0.49 0.68
 -12 -6 3 0.52 0.66
 12 6 3 1.18 0.62
 -12 -6 3 0.77 0.7
 12 -6 -3 0.85 0.48
 -12 6 -3 0.64 0.46
 -12 6 -3 1.74 0.48
 12 -6 -3 1.9 0.58
 12 6 -3 1.19 0.65
 -12 6 3 0.88 0.56
 -12 -6 -3 1.62 0.63
 -12 6 3 1.03 0.56
 12 -6 3 0.89 0.48
 -12 6 3 1.65 0.47
 -12 -6 -3 1.26 0.63
 12 6 -3 1.87 0.69
 -12 -6 -3 0.71 0.71
 12 6 -3 1.33 0.62
 -12 7 -3 3.4 0.61
 12 -7 -3 2.34 0.64
 12 7 3 3.3 0.75
 -12 -7 3 2.71 0.75
 12 -7 -3 3.11 0.63
 12 7 3 2.44 0.68
 -12 7 -3 2.71 0.58
 -12 -7 3 2.69 1.38
 -12 -7 3 4.11 0.74
 -12 -7 3 1.85 0.73
 12 -7 -3 1.8 0.47
 12 7 3 2.78 0.76
 -12 7 3 3.41 0.64
 -12 -7 -3 5.34 1.25
 -12 -7 -3 3.33 0.72
 -12 -7 -3 2.67 0.79
 12 7 -3 2.21 0.73
 12 -7 3 2.72 0.59
 -12 7 3 3.76 0.66
 12 7 -3 4.34 0.74
 12 7 -3 2.48 0.77
 -12 -8 3 4.05 0.84
 -12 8 -3 3.84 0.66
 -12 -8 3 4.61 1.06
 -12 -8 3 3.76 0.82
 -12 -8 3 3.45 0.8
 12 -8 -3 3.22 0.75
 12 -8 -3 5.26 0.74
 12 -8 -3 3.3 0.46
 12 8 3 3.78 0.83
 12 8 3 3.22 1.21
 -12 8 -3 4.57 0.7
 -12 8 3 2.81 0.71
 -12 -8 -3 3.54 0.79
 -12 8 3 4.01 0.64
 12 -8 3 4.35 0.66
 12 8 -3 4.38 0.79
 -12 -8 -3 3.83 0.78
 12 8 -3 3.68 0.78
 12 -8 3 4.77 0.73
 12 8 -3 4.5 0.82
 -12 -8 -3 5.12 0.92
 -12 8 3 5.46 0.75
 -12 -8 -3 3.21 0.83
 -12 9 -3 14.32 0.94
 -12 -9 3 12.34 1.02
 -12 -9 3 14.02 1.09
 12 9 3 11.1 1.03
 12 9 3 12.45 1
 -12 9 -3 13.31 1.14
 12 9 3 12.35 1.05
 -12 -9 3 12.57 1.08
 -12 -9 3 12.45 1.09
 12 -9 -3 11.89 0.92
 12 9 -3 13.03 1.13
 -12 9 3 12.68 0.93
 -12 9 3 14.06 1.03
 12 9 -3 12.31 1.08
 -12 -9 -3 11.37 1.13
 12 -9 3 13.59 0.95
 12 -9 3 12.21 0.86
 -12 -9 -3 13.38 1.01
 12 9 -3 13.82 1.06
 -12 9 3 11.83 0.84
 -12 -9 -3 11.05 0.97
 -12 10 -3 0.98 0.76
 -12 -10 3 -0.28 0.88
 12 10 3 0.72 0.91
 12 -10 -3 0.63 0.8
 -12 10 -3 1.75 0.76
 12 10 3 2.33 0.98
 -12 -10 3 -1.19 0.9
 -12 -10 3 -0.71 0.87
 12 10 3 -0.86 0.87
 -12 10 3 0.96 0.85
 -12 -10 -3 0.16 0.82
 12 10 -3 -0.08 0.88
 12 -10 3 1.92 0.84
 12 10 -3 2.12 0.98
 -12 -10 -3 0.28 0.9
 -12 10 3 0.33 0.82
 -12 10 3 1.15 0.7
 -12 -10 -3 1.55 0.94
 12 10 -3 -0.35 0.9
 -12 11 -3 7.77 0.97
 -12 11 -3 8.65 0.97
 12 -11 -3 8.17 1.01
 12 11 3 8.32 1.11
 -12 -11 3 11.25 1.25
 12 11 3 7.36 1.02
 12 11 3 9.72 1.14
 -12 11 -3 9.58 1.03
 -12 -11 3 7.44 1.07
 -12 -11 3 10.48 1.17
 -12 -11 3 7.33 1.15
 12 -11 3 10.57 1.06
 -12 11 3 10.5 1.03
 12 11 -3 10.2 1.26
 12 11 -3 9.88 1.12
 -12 11 3 7.41 0.99
 -12 -11 -3 10.86 1.22
 12 -11 3 10.3 0.97
 12 11 -3 10.43 1.1
 -12 -11 -3 6.93 1
 -12 12 -3 0.92 0.95
 12 12 3 1.54 1.16
 12 12 3 -0.28 1.04
 -12 -12 3 2.58 1.05
 -12 12 -3 3.72 0.99
 12 -12 -3 2.8 1.02
 -12 12 -3 -0.03 0.9
 12 12 3 0.74 0.97
 -12 -12 3 1.38 1.12
 -12 -12 3 1.17 1.08
 12 -12 -3 2.13 0.95
 -12 -12 -3 1.09 0.91
 -12 12 3 1.38 1.03
 12 12 -3 2.65 1.03
 -12 12 3 0.7 1.02
 -12 12 3 2.53 0.83
 -12 -12 -3 2.56 1.03
 -12 -12 -3 1.28 1.08
 12 -12 3 3.54 0.9
 12 -12 3 2.41 0.99
 -12 -12 -3 3.75 1
 -12 13 -3 3.65 1.11
 -12 -13 3 3.76 1.25
 12 13 3 4.54 1.26
 -12 -13 3 2.9 1.06
 12 13 3 3.26 1.16
 12 13 3 3.87 1.04
 -12 13 -3 2.28 1.06
 -12 -13 3 3.1 1.23
 -12 -13 3 4.16 1.2
 -12 13 -3 3.94 1.11
 12 -13 -3 2.88 1.11
 -12 13 3 4 1.15
 -12 13 3 3.94 1.14
 12 -13 3 2.5 1.11
 -12 13 3 2.11 0.94
 -12 -13 -3 2.86 1.06
 12 13 -3 3.96 1.16
 -12 -13 -3 1.48 1.17
 -12 -13 -3 3.72 1.25
 12 13 -3 4.55 1.21
 -12 -14 3 -1.26 1.12
 12 14 3 0.91 1.36
 12 -14 -3 0.89 1.2
 -12 14 -3 1.16 1.15
 12 14 3 0.62 1.32
 -12 -14 3 3.25 1.4
 12 -14 3 0.88 1.09
 12 -14 3 0.03 1.21
 -12 14 3 1.02 1.22
 -12 -14 -3 1.67 1.25
 12 14 -3 -1.16 1.27
 -12 -14 -3 0.96 0.94
 12 14 -3 2.49 1.24
 12 14 -3 -0.59 1.4
 -13 0 -3 0.75 0.48
 -13 0 3 0.19 0.54
 -13 0 -3 1 0.49
 -13 -1 3 2.73 0.44
 -13 -1 3 1.81 0.6
 -13 -1 3 2.45 0.4
 -13 1 -3 2.94 0.5
 -13 1 -3 2.79 0.5
 -13 -1 -3 2.18 0.54
 -13 1 3 2.48 0.54
 -13 -1 -3 3.38 0.55
 -13 -2 3 6.75 0.73
 -13 2 -3 6.83 0.58
 -13 -2 3 8.21 0.57
 13 -2 -3 7.08 0.67
 -13 2 3 6.8 0.62
 13 2 -3 8.22 0.53
 -13 -2 -3 6.9 0.69
 -13 2 3 7.06 0.46
 -13 -2 -3 7.89 0.68
 13 2 -3 7.52 0.58
 13 -3 -3 0.18 0.55
 -13 3 -3 0.33 0.47
 -13 3 -3 0.54 0.46
 -13 -3 3 -0.99 0.5
 -13 -3 3 0.27 0.45
 -13 -3 3 -0.15 0.65
 13 3 3 1.06 0.58
 13 3 -3 0.13 0.49
 -13 3 3 0.21 0.34
 -13 -3 -3 -0.24 0.6
 -13 -3 -3 -0.2 0.55
 13 3 -3 -0.16 0.47
 -13 3 3 -0.22 0.48
 -13 4 -3 3.64 0.49
 -13 -4 3 4.4 0.62
 13 4 3 4.92 0.53
 13 -4 -3 5.64 0.52
 -13 -4 3 5.27 0.58
 13 -4 -3 5.5 0.61
 13 4 3 4.4 0.71
 -13 -4 -3 4.96 0.54
 -13 4 3 4.06 0.53
 -13 4 3 4.02 0.48
 -13 -4 -3 4.55 0.69
 -13 4 3 4.55 0.49
 -13 -4 -3 4.79 0.74
 -13 4 3 4.91 0.41
 13 4 -3 4.39 0.6
 13 4 -3 4.5 0.64
 -13 -5 3 9.17 0.78
 -13 5 -3 7.41 0.51
 13 5 3 9.07 0.66
 -13 -5 3 8.84 0.7
 13 -5 -3 8.08 0.64
 -13 -5 3 7 0.84
 13 -5 -3 8.39 0.63
 13 5 3 7.89 0.78
 -13 -5 -3 8.05 0.66
 13 5 -3 8.45 0.7
 -13 5 3 9.08 0.67
 -13 5 3 7.14 0.57
 -13 -5 -3 8.4 0.66
 -13 5 3 8.65 0.59
 -13 -5 -3 9.13 0.82
 13 5 -3 8.14 0.74
 13 5 -3 9.33 0.72
 13 6 3 1.54 0.66
 13 6 3 0.6 0.6
 13 6 3 1.39 0.71
 13 -6 -3 0.12 0.56
 -13 -6 3 0.45 0.69
 -13 -6 3 0.89 0.64
 -13 -6 3 0.35 0.67
 13 -6 -3 1.37 0.51
 -13 -6 3 1.41 1.22
 -13 6 3 1.15 0.55
 -13 6 3 0.74 0.53
 -13 -6 -3 1.11 1.24
 -13 6 3 1.39 0.5
 13 6 -3 0.74 0.64
 -13 -6 -3 1.12 0.62
 -13 6 3 0.86 0.41
 13 6 -3 1.44 0.69
 -13 -6 -3 1.42 0.6
 -13 -6 -3 0.7 0.74
 13 6 -3 1.06 0.65
 13 -7 -3 11 0.76
 13 7 3 9.55 0.93
 -13 7 -3 10.98 0.92
 13 7 3 10.87 0.85
 -13 -7 3 11.53 0.94
 -13 -7 3 10.76 0.9
 -13 -7 3 10.79 0.97
 13 -7 -3 10.67 0.78
 -13 7 -3 10.72 0.69
 13 -7 -3 12.17 0.96
 13 7 3 12.39 0.88
 -13 -7 3 9.62 0.85
 -13 7 3 10.99 0.78
 13 7 -3 10.79 1.26
 -13 7 3 10.98 0.78
 -13 -7 -3 11.04 0.98
 -13 7 3 9.3 0.67
 13 7 -3 11.23 0.87
 13 -7 3 9.99 0.66
 13 -7 3 10.75 0.91
 -13 -7 -3 11.66 0.88
 13 7 -3 9.71 0.88
 -13 -7 -3 9.42 0.94
 -13 7 3 9.48 0.84
 -13 -7 -3 11.47 0.83
 -13 -8 3 7.71 0.95
 -13 -8 3 6.86 0.88
 13 8 3 8.2 0.88
 13 -8 -3 6.46 0.55
 -13 8 -3 8.02 0.69
 -13 8 -3 7.23 0.69
 -13 -8 3 6.5 0.93
 13 8 3 8.01 0.9
 -13 -8 3 5.76 0.88
 13 -8 -3 6.68 0.75
 13 8 3 6.88 0.9
 13 8 -3 7.17 0.88
 -13 8 3 6.63 0.76
 -13 8 3 7.39 0.79
 -13 -8 -3 7.71 1.15
 -13 -8 -3 7.06 0.97
 -13 -8 -3 6.96 1.37
 -13 8 3 6.71 0.68
 13 8 -3 6.45 0.89
 -13 -8 -3 8.35 0.87
 13 -8 3 8.63 0.74
 13 9 3 0.4 0.81
 13 9 3 1.62 0.81
 -13 9 -3 0.23 0.66
 13 9 3 0.51 0.9
 -13 -9 3 1.37 0.88
 -13 -9 3 0.68 0.82
 -13 9 -3 0.01 0.7
 13 -9 -3 0.36 0.72
 -13 9 3 0.22 0.76
 -13 -9 -3 1.27 0.95
 -13 9 3 1.12 0.64
 13 -9 3 0.93 0.67
 13 9 -3 1.28 0.81
 13 9 -3 1.4 0.87
 -13 -9 -3 1.39 0.83
 13 9 -3 -0.11 0.84
 13 -9 3 1.06 0.74
 -13 -9 -3 0.83 0.88
 -13 9 3 2.03 0.79
 -13 -9 -3 -0.02 0.84
 13 -10 -3 1.41 0.84
 -13 10 -3 1.13 0.76
 13 10 3 3.04 0.97
 13 10 3 3.2 1.02
 -13 -10 3 1.23 0.9
 -13 -10 3 0.88 0.97
 13 -10 -3 1.39 0.83
 13 10 3 2.7 0.9
 -13 10 -3 1.35 0.81
 -13 -10 3 2.56 0.91
 -13 -10 3 0.95 0.87
 13 -10 3 2.74 0.78
 13 -10 3 1.13 0.81
 -13 -10 -3 0.53 0.97
 -13 -10 -3 1.77 0.9
 -13 10 3 1.01 0.73
 13 10 -3 2.28 0.9
 13 10 -3 -0.25 0.87
 13 10 -3 2.07 1
 -13 -10 -3 3.2 0.91
 -13 -11 3 -0.53 1.04
 -13 11 -3 1.74 0.85
 13 -11 -3 0.96 0.88
 -13 -11 3 0.23 1.05
 -13 -11 3 -0.65 0.95
 -13 11 -3 -0.58 0.81
 -13 -11 3 1.4 0.98
 13 11 3 1 0.88
 13 11 3 -0.07 1.01
 13 11 -3 -0.32 0.95
 -13 11 3 1.57 0.9
 -13 11 3 -0.99 0.86
 -13 -11 -3 -0.29 1.02
 -13 11 3 -0.45 0.73
 13 11 -3 1.69 0.95
 13 11 -3 -0.69 1.03
 -13 -11 -3 1.14 0.96
 -13 -11 -3 0.8 0.93
 13 -11 3 0.41 0.89
 -13 -12 3 0.06 1.09
 -13 -12 3 3.97 1.09
 13 12 3 0.58 1.06
 13 12 3 2.32 1.09
 13 12 -3 2.7 1.07
 13 12 -3 4.16 1.17
 -13 12 3 1.8 0.83
 -13 -12 -3 3.71 1.06
 -13 -12 -3 0.5 0.89
 -13 12 3 1.84 1.02
 -13 -12 -3 1.58 1.1
 13 12 -3 2.38 1.08
 13 -12 3 2.74 1
 13 -12 3 3.72 0.88
 -13 -12 -3 2.66 1.09
 13 13 3 0.29 1.19
 -13 -13 3 0.05 1.24
 13 -13 -3 2.65 1.12
 13 13 3 1.08 1.23
 13 -13 -3 1.26 1.1
 -13 -13 3 1.07 1.17
 13 13 3 1.57 1.13
 -13 13 -3 -0.06 1.07
 -13 -13 3 -0.47 1.1
 -13 13 3 1.23 1.16
 13 13 -3 2.85 1.19
 -13 -13 -3 0.95 1.06
 13 -13 3 1.7 1.06
 13 13 -3 1.67 1.26
 -13 -13 -3 1.82 1.12
 13 13 -3 3.08 1.13
 -13 13 3 1.63 1.11
 -14 0 3 0.18 0.58
 -14 0 -3 1.05 0.52
 -14 0 -3 -0.2 0.53
 -14 1 -3 2.25 0.53
 -14 -1 3 1.17 0.44
 -14 1 -3 1.45 0.51
 -14 -1 3 3.12 0.63
 -14 -1 -3 1.97 0.57
 -14 -1 -3 1.93 0.58
 -14 1 3 2.58 0.58
 -14 2 -3 28.53 1.2
 -14 -2 3 32.42 1.57
 -14 2 -3 29.93 1.32
 -14 -2 3 31.88 1.19
 -14 -2 -3 31.83 1.55
 -14 2 3 29.98 1.39
 -14 -2 -3 30.8 1.35
 -14 2 3 27.14 1.01
 -14 3 -3 1.83 0.51
 -14 -3 3 2.16 0.53
 -14 -3 3 2.39 0.69
 -14 3 3 2.02 0.39
 14 3 -3 3.01 0.56
 -14 -3 -3 1.23 0.68
 -14 3 3 2.48 0.54
 -14 -4 3 3 0.57
 -14 -4 3 3.98 0.82
 -14 4 -3 3.74 0.52
 -14 4 -3 4.66 0.57
 -14 -4 3 4.38 0.63
 14 4 3 3.4 0.51
 -14 -4 3 4.66 0.68
 14 4 3 3.81 0.72
 14 4 -3 3.56 0.69
 -14 -4 -3 4.9 0.52
 -14 4 3 4.82 0.59
 -14 -4 -3 4.53 0.49
 14 4 -3 4.9 0.61
 14 4 -3 4.89 0.62
 -14 -4 -3 3.88 0.72
 -14 4 3 3.9 0.42
 -14 -4 -3 4.46 0.78
 -14 -5 3 1.56 0.62
 -14 -5 3 2.12 0.81
 -14 -5 3 0.78 0.58
 14 5 3 1.66 0.71
 -14 -5 3 1.61 0.69
 14 5 3 1.98 0.55
 -14 -5 -3 1.5 0.54
 -14 5 3 1.3 0.48
 14 5 -3 1.49 0.65
 -14 5 3 1.87 0.47
 14 5 -3 0.42 0.61
 14 5 -3 2.7 0.62
 -14 -5 -3 1.82 1.34
 -14 -5 -3 2.2 0.57
 -14 -5 -3 2.07 0.74
 -14 5 3 1.48 0.4
 -14 -6 3 1.36 0.74
 14 6 3 1.84 0.63
 -14 -6 3 1.65 0.66
 14 6 3 2.28 0.62
 -14 -6 3 2.15 0.84
 14 6 3 2.7 0.76
 14 6 -3 1.24 0.71
 -14 -6 -3 1.96 0.66
 -14 -6 -3 1.77 0.79
 -14 6 3 2.09 0.47
 -14 -6 -3 1.15 0.79
 -14 6 3 2.8 0.54
 -14 -6 -3 2.74 0.66
 14 6 -3 1.53 0.63
 -14 6 3 1.73 0.5
 14 7 3 4.66 0.76
 14 7 3 5.54 1.32
 -14 -7 3 4.78 0.77
 -14 -7 3 4.88 0.89
 -14 -7 3 5.42 0.86
 -14 -7 3 6.6 1.36
 14 7 3 6.71 0.8
 -14 -7 -3 4.35 0.85
 -14 -7 -3 5.75 0.77
 -14 -7 -3 6.11 0.95
 -14 7 3 4.7 0.59
 -14 7 3 5.49 0.67
 14 7 -3 6.79 0.82
 -14 -7 -3 5.86 0.74
 -14 7 3 5.77 0.52
 -14 7 3 6.55 0.67
 14 7 -3 3.94 0.8
 14 7 -3 5.82 0.79
 14 8 3 2.62 0.87
 -14 8 -3 2.74 0.73
 -14 -8 3 3.03 0.8
 14 -8 -3 2.91 0.67
 -14 8 -3 3.06 0.62
 -14 -8 3 2.8 0.85
 14 8 3 3.02 0.81
 -14 -8 3 2.97 0.94
 -14 8 3 2.6 0.71
 -14 8 3 2.35 0.61
 14 8 -3 1.34 0.8
 -14 -8 -3 2.3 0.8
 -14 -8 -3 3.2 0.92
 -14 -8 -3 2.08 0.76
 14 8 -3 2.91 0.8
 -14 -8 -3 4.42 0.96
 14 8 -3 2.54 0.85
 14 -8 3 3.89 0.64
 -14 8 3 1.88 0.71
 -14 -9 3 5.78 0.97
 14 9 3 7.33 0.94
 14 9 3 6.48 0.89
 -14 9 -3 7.66 0.78
 14 -9 -3 6.59 0.86
 -14 9 -3 7.29 0.75
 -14 -9 3 7.44 1.01
 14 9 3 7.95 1.02
 -14 -9 3 5.81 0.94
 14 -9 -3 8.1 0.81
 14 -9 3 6.27 1.22
 -14 9 3 6.37 0.81
 -14 -9 -3 7.18 0.93
 14 9 -3 5.03 0.9
 -14 9 3 5.87 0.71
 -14 9 3 7.48 0.86
 -14 -9 -3 7.05 1.05
 14 9 -3 7.79 1.03
 14 10 3 16.78 1.19
 14 10 3 13.53 1.2
 14 10 3 12.97 1.13
 14 -10 -3 16.65 1.1
 -14 10 -3 15.43 1.22
 -14 -10 3 15.43 1.23
 -14 10 -3 14.23 1.26
 14 10 -3 15.89 1.2
 -14 -10 -3 13.85 1.31
 -14 -10 -3 15.49 1.13
 -14 10 3 14.15 0.95
 -14 10 3 15.7 1.39
 14 10 -3 15.39 1.16
 -14 -10 -3 16.43 1.2
 14 10 -3 14 1.21
 -14 10 3 15.94 1.06
 14 -10 3 15.45 1.31
 14 11 3 0.35 1
 14 -11 -3 -0.55 0.89
 14 11 3 -0.46 0.99
 -14 -11 3 0.12 1.02
 14 -11 -3 1.59 0.83
 -14 -11 3 1.47 1.01
 -14 -11 3 -1.41 1.09
 -14 11 -3 1.4 0.82
 -14 -11 3 -0.59 1.02
 14 11 -3 -1.15 0.97
 -14 11 3 0.63 0.9
 -14 -11 -3 -0.6 0.93
 14 11 -3 -0.2 0.95
 14 11 -3 1.55 1.03
 -14 11 3 1.37 0.89
 -14 -11 -3 -0.17 0.95
 14 -11 3 0.81 0.87
 -14 -11 -3 0.06 1.11
 -14 -12 3 2.65 1.07
 14 -12 -3 -0.21 0.99
 -14 12 -3 -0.61 0.94
 14 -12 -3 -0.24 1.02
 14 12 3 1.03 1.15
 -14 -12 3 1.55 1.2
 14 12 3 -0.39 1.03
 -14 12 -3 -0.24 0.87
 14 12 3 -1.32 1.06
 -14 -12 3 0.76 1.13
 -14 12 -3 1.29 0.92
 14 12 -3 0.73 1.1
 -14 -12 -3 0.03 0.98
 -14 -12 -3 0.86 1.09
 14 -12 3 0.62 0.98
 14 -12 3 2.51 0.89
 -14 -12 -3 1.58 0.98
 14 12 -3 2 1.13
 -14 12 3 0.81 0.83
 14 12 -3 0.66 1.05
 -14 -12 -3 -0.15 1.18
 -14 13 -3 2.18 1.03
 14 -13 -3 1.83 1.15
 -14 -13 3 3.58 1.19
 14 13 3 3.84 1.17
 -14 -13 3 3.97 1.28
 14 -13 3 3.28 1.1
 -14 -13 -3 1.35 1.25
 -14 13 3 1.65 0.99
 -14 -13 -3 1.67 1.12
 14 13 -3 2.66 1.29
 14 13 -3 1.25 1.27
 -15 0 -3 -0.17 0.53
 -15 0 3 0.38 0.61
 -15 0 -3 -0.2 0.55
 -15 -1 3 1.34 0.49
 -15 1 -3 0.89 0.59
 -15 1 -3 0.85 0.55
 -15 1 3 2.12 0.6
 -15 -1 -3 2.06 0.6
 -15 -2 3 19.86 1.05
 -15 -2 3 18.18 1.46
 -15 2 -3 17.69 1.04
 -15 2 -3 16.5 1.21
 -15 -2 -3 17.16 1.39
 -15 -2 -3 19.04 1.19
 -15 -3 3 2.49 0.78
 -15 -3 3 2.26 0.52
 -15 3 -3 3.11 0.58
 -15 -3 3 1.69 0.57
 -15 3 -3 2.26 0.52
 15 3 -3 2.1 0.6
 -15 -3 -3 3.29 0.74
 15 3 -3 2.27 0.53
 -15 3 3 2.24 0.42
 15 3 -3 2.75 0.51
 -15 4 -3 1.54 0.55
 15 4 3 3.34 0.72
 -15 4 -3 2.29 0.54
 -15 -4 3 2.62 0.56
 -15 -4 3 2.35 0.6
 -15 -4 3 2.54 0.79
 15 4 -3 3.09 0.63
 -15 -4 -3 3.09 1.25
 -15 4 3 2.11 0.42
 15 4 -3 3.26 0.57
 -15 4 3 3.32 0.6
 -15 -4 -3 1.14 0.69
 -15 -5 3 1.66 0.73
 -15 5 -3 2.43 0.55
 -15 -5 3 2.13 0.66
 -15 -5 3 1.28 0.83
 15 5 3 1.45 0.54
 15 5 3 1.06 0.51
 -15 -5 3 1.29 0.57
 -15 5 3 1.84 0.43
 -15 -5 -3 2.03 0.55
 15 5 -3 2.54 0.67
 -15 -5 -3 2.48 0.7
 15 5 -3 1.02 0.61
 15 5 -3 1.13 0.64
 -15 -6 3 0.23 0.7
 15 6 3 1.73 0.94
 -15 -6 3 1.58 0.76
 -15 -6 3 -0.16 0.8
 15 -6 -3 1.19 0.47
 15 6 3 0.56 0.59
 -15 -6 3 0.78 0.67
 15 6 -3 0.74 1.07
 15 6 -3 -0.25 0.69
 -15 -6 -3 -0.21 0.85
 -15 -6 -3 0.98 0.62
 -15 6 3 1.04 0.52
 -15 6 3 0.21 0.49
 -15 6 3 0.26 0.49
 -15 -6 -3 0.25 0.83
 -15 6 3 0.48 0.42
 15 -7 -3 0.41 0.63
 -15 -7 3 1.02 0.86
 15 7 3 0.83 0.71
 15 7 3 1.57 0.81
 15 7 3 0.59 0.69
 15 -7 -3 0.18 0.38
 -15 -7 3 1.5 0.83
 -15 -7 3 -0.03 0.7
 15 7 -3 -1.2 0.71
 -15 7 3 -0.45 0.51
 -15 7 3 -0.07 0.58
 -15 -7 -3 1.24 0.77
 -15 -7 -3 -0.79 0.79
 -15 -7 -3 0.47 0.65
 -15 7 3 1.2 0.46
 15 7 -3 -0.37 0.74
 15 -8 -3 2.87 1.26
 -15 -8 3 3.67 0.94
 -15 -8 3 2.92 0.84
 15 8 3 3.45 0.87
 15 8 3 1.13 0.76
 -15 -8 3 2.38 0.78
 -15 -8 3 3.32 1.1
 -15 8 3 2.49 0.62
 -15 -8 -3 4.47 1
 -15 8 3 2.57 0.71
 -15 -8 -3 2.57 0.78
 -15 -8 -3 3.21 0.79
 15 8 -3 2.51 0.91
 15 8 -3 1.7 0.82
 -15 -8 -3 3.01 0.87
 -15 8 3 2.66 0.68
 15 8 -3 4.9 1.31
 -15 9 -3 3.01 0.82
 -15 -9 3 2.4 0.86
 15 9 3 1.2 0.95
 15 -9 -3 1.11 0.68
 -15 -9 3 2.63 0.86
 -15 9 -3 2.79 0.67
 -15 -9 3 3.85 1
 -15 -9 3 2.43 1.04
 15 9 3 1.15 0.84
 15 9 3 3.17 0.91
 -15 -9 -3 0.58 0.86
 -15 -9 -3 2.09 0.94
 -15 9 3 0.85 0.67
 15 9 -3 2.68 0.96
 15 9 -3 0.84 0.9
 -15 -9 -3 1.29 1.01
 15 9 -3 1.53 0.86
 -15 9 3 2.35 0.73
 -15 9 3 2.08 0.75
 -15 -10 3 0.4 1.09
 -15 -10 3 0.96 0.96
 15 -10 -3 1.16 0.76
 -15 -10 3 0.13 0.95
 15 -10 -3 0.93 0.86
 15 10 3 0.33 0.96
 -15 10 -3 1.38 0.74
 -15 10 -3 -0.13 0.7
 -15 10 3 0.47 0.82
 15 10 -3 -0.74 0.9
 -15 -10 -3 -0.67 0.88
 15 10 -3 2.31 0.97
 -15 10 3 1.46 0.83
 -15 -10 -3 1.01 0.96
 -15 -10 -3 0.5 1.07
 -15 -10 -3 -0.11 1.03
 15 -10 3 -0.96 0.77
 15 -11 -3 -0.22 0.95
 15 11 3 0.12 1.05
 -15 -11 3 -0.38 1
 -15 11 -3 -0.98 0.9
 15 11 3 -1 1
 -15 -11 3 -0.87 1.16
 -15 11 -3 -0.48 0.81
 -15 11 -3 0.23 0.82
 -15 -11 3 1.57 1.08
 15 11 3 1.02 1.02
 15 11 -3 1.28 1.01
 -15 11 3 -0.31 0.75
 -15 -11 -3 -0.07 0.99
 15 -11 3 0 0.87
 15 11 -3 -1.79 1
 -15 -11 -3 0.08 1.02
 -15 11 3 1.1 0.9
 -15 -11 -3 0.08 1.2
 -15 11 3 -0.47 0.9
 -15 -11 -3 -0.44 0.98
 -15 12 -3 -0.21 0.93
 -15 12 -3 -0.41 0.97
 -15 -12 3 -2.47 1.17
 -15 -12 3 -0.18 1.23
 -15 -12 3 0.34 1.13
 15 12 3 -1.91 1.08
 -15 12 -3 -1.89 0.96
 15 12 3 0.18 1.17
 15 12 3 1.29 1.18
 15 -12 -3 2.15 1.04
 -15 -12 -3 0.79 1.03
 -15 -12 -3 -1.17 1.1
 -15 12 3 1.32 0.83
 15 12 -3 -2.1 1.12
 -15 -12 -3 -0.48 1.21
 -15 12 3 1.47 1.06
 15 -12 3 -0.39 0.96
 -15 -12 -3 -0.56 1.07
 15 12 -3 1.14 1.14
 -15 12 3 2.05 1
 15 -12 3 0.95 0.93
 15 12 -3 -2.11 1.08
 -16 0 -3 0.4 0.62
 -16 0 3 1.42 0.65
 -16 1 -3 4.8 0.67
 -16 -1 3 5.6 0.59
 -16 -1 3 5.59 0.8
 -16 1 -3 5.73 0.66
 -16 1 3 6.01 0.51
 -16 -1 -3 5.25 0.7
 -16 -1 -3 5.51 0.7
 -16 1 3 7.01 0.77
 -16 -2 3 2.13 0.54
 -16 2 -3 0.49 0.59
 -16 2 -3 1.44 0.55
 -16 -2 -3 1.58 0.69
 -16 -2 -3 1.49 0.64
 -16 2 3 1.84 0.63
 -16 3 -3 1.67 0.56
 -16 3 -3 1.42 0.59
 -16 -3 3 1.89 0.52
 -16 -3 3 2.89 0.64
 -16 3 3 1.19 0.6
 -16 3 3 1.74 0.44
 -16 -3 -3 2.68 0.72
 -16 -3 -3 3.23 0.92
 -16 4 -3 8.07 0.68
 -16 -4 3 11.03 1.01
 -16 4 -3 9.88 0.72
 -16 -4 3 9.18 0.72
 -16 4 3 9.47 0.75
 -16 4 3 9.62 0.73
 16 4 -3 9.1 0.66
 16 4 -3 9.1 0.76
 -16 -4 -3 10.55 0.91
 -16 -4 -3 9.07 0.92
 -16 -5 3 2.65 0.77
 16 5 3 2.39 0.76
 -16 -5 3 2.29 0.67
 -16 -5 3 1.41 0.87
 -16 5 -3 2.2 0.61
 -16 -5 3 2.37 0.61
 16 5 -3 2.95 0.69
 -16 -5 -3 3.76 0.86
 -16 -5 -3 4.01 0.86
 -16 5 3 2.3 0.44
 16 5 -3 2.28 0.64
 -16 -5 -3 3.34 0.52
 -16 6 -3 0.68 0.57
 -16 -6 3 1.03 0.89
 16 6 3 0.81 0.59
 -16 -6 3 0.43 0.8
 -16 -6 3 1.91 0.66
 16 6 3 0.62 0.77
 -16 6 3 0.84 0.49
 16 6 -3 2.22 0.73
 16 6 -3 1.11 0.71
 -16 -6 -3 1.4 0.7
 -16 6 3 0.87 0.42
 -16 -6 -3 1.71 1.02
 16 6 -3 1.57 0.72
 -16 -6 -3 2.65 0.92
 -16 6 3 0.72 0.5
 -16 -7 3 2.23 0.77
 16 7 3 2.13 0.84
 16 7 3 2.75 0.73
 -16 -7 3 1.33 0.97
 16 7 3 2.45 0.69
 -16 -7 3 2.13 0.73
 -16 -7 3 2.07 0.88
 16 7 -3 1.58 0.82
 -16 -7 -3 3.97 0.97
 -16 7 3 1.98 0.48
 -16 -7 -3 3.13 0.68
 -16 7 3 1.76 0.48
 16 7 -3 1.43 0.78
 16 7 -3 2.13 0.75
 -16 7 3 1.43 0.6
 -16 -7 -3 2.49 0.9
 16 -8 -3 17.65 1.39
 16 8 3 17.51 1.22
 -16 -8 3 14.98 1.31
 -16 -8 3 16.63 1.34
 16 8 3 20.33 1.32
 -16 -8 3 17.31 1.38
 -16 -8 -3 18.8 1.38
 16 8 -3 16.32 1.1
 -16 -8 -3 15.97 1.25
 -16 8 3 18.25 1.12
 16 8 -3 16.32 1.43
 -16 -8 -3 20.27 1.32
 16 8 -3 17.35 1.52
 16 9 3 -0.49 0.85
 -16 -9 3 0.03 1
 -16 -9 3 0.38 0.99
 -16 -9 3 -0.71 0.85
 16 9 3 -0.34 0.82
 -16 -9 3 0.89 0.79
 16 -9 -3 1.14 0.77
 -16 9 3 0.33 0.66
 -16 -9 -3 0.48 1.08
 16 9 -3 -1.17 0.87
 -16 -9 -3 1.54 0.86
 -16 -9 -3 1.31 0.82
 -16 -9 -3 -0.18 0.97
 -16 9 3 1.61 0.74
 -16 9 3 0.59 0.65
 16 9 -3 1.18 0.89
 -16 10 -3 0.5 0.71
 -16 -10 3 0.2 1.06
 16 -10 -3 1.3 0.78
 16 10 3 2.84 1.02
 -16 -10 3 0.79 1.01
 16 10 3 1.68 1.04
 -16 -10 3 1.89 1.08
 16 -10 -3 1.74 0.88
 16 10 3 1.9 0.92
 -16 10 -3 3 0.73
 -16 -10 -3 2.92 1.03
 -16 -10 -3 1.85 0.91
 -16 -10 -3 1.97 0.92
 16 -10 3 2.99 0.75
 -16 10 3 1.08 0.74
 -16 10 3 2.91 0.73
 16 10 -3 1.01 1.01
 16 -10 3 1.34 0.69
 -16 -10 -3 1.93 1.17
 16 10 -3 3.36 1.03
 -16 11 -3 -0.77 0.79
 -16 11 -3 -0.52 0.93
 16 -11 -3 -0.03 0.87
 -16 -11 3 0.11 1.11
 16 -11 -3 0.66 0.9
 -16 -11 3 -2.29 1.16
 16 11 3 -0.46 1.07
 16 11 3 1.74 0.99
 16 11 3 -0.07 1.1
 -16 11 -3 1.71 0.85
 16 11 -3 1.65 1.06
 -16 -11 -3 -1.05 0.98
 -16 -11 -3 1.36 1.29
 -16 -11 -3 0.49 0.99
 -16 11 3 -0.34 0.88
 16 -11 3 1.34 0.87
 -16 11 3 1.6 0.96
 16 11 -3 -0.61 1.1
 16 -11 3 0.59 0.76
 -17 0 3 0.18 0.48
 -17 0 -3 0.78 0.66
 -17 0 3 0.82 0.72
 -17 0 -3 1.33 0.62
 -17 -1 3 3.26 0.58
 -17 1 -3 2.9 0.63
 -17 1 -3 1.66 0.67
 -17 -1 3 2.55 0.81
 -17 -1 -3 3.77 0.7
 -17 1 3 2.33 0.69
 -17 1 3 2.19 0.49
 -17 -1 -3 3.75 0.74
 -17 -2 3 1.37 0.59
 -17 2 -3 1.81 0.61
 -17 -2 3 2.89 0.82
 -17 -2 -3 0.76 0.76
 -17 2 3 1.62 0.68
 -17 3 -3 0.17 0.6
 -17 3 -3 1.21 0.57
 -17 -3 3 0.54 0.8
 -17 -3 3 1 0.65
 -17 3 3 -0.5 0.6
 -17 -3 -3 0.17 0.72
 -17 -3 -3 0.86 0.78
 -17 4 -3 4.34 0.63
 -17 -4 3 5.38 0.78
 -17 -4 3 4.91 0.57
 -17 -4 3 4.88 0.61
 -17 -4 3 4.93 0.93
 -17 -4 -3 5.25 0.92
 -17 -4 -3 5.72 0.86
 -17 4 3 3.78 0.65
 17 4 -3 5.28 0.64
 -17 4 3 4.97 0.48
 17 4 -3 4.5 0.7
 -17 5 -3 -0.71 0.56
 -17 -5 3 1.92 0.94
 -17 -5 3 0.24 0.58
 -17 -5 3 -1.35 0.75
 -17 -5 3 0.35 0.61
 -17 5 3 0.5 0.42
 17 5 -3 0.01 0.5
 -17 5 3 0.28 0.57
 -17 -5 -3 0.28 0.81
 17 5 -3 -0.21 0.67
 17 5 -3 0.07 0.69
 -17 -6 3 2.54 0.72
 -17 -6 3 2.26 0.98
 17 6 3 1.6 0.87
 17 6 3 1.25 0.63
 -17 -6 3 1.94 0.65
 -17 -6 -3 3.47 0.63
 -17 -6 -3 2.6 0.55
 -17 6 3 2.71 0.55
 -17 -6 -3 1.65 0.91
 17 6 -3 3.96 0.72
 -17 6 3 2.52 0.47
 17 6 -3 2.35 0.77
 -17 -7 3 3.67 0.98
 -17 -7 3 3.48 0.75
 -17 -7 3 4.19 1.11
 17 7 3 2.75 0.95
 -17 7 -3 2.1 0.65
 17 7 3 4.2 0.69
 -17 -7 3 3.86 0.79
 -17 7 3 2.68 0.56
 17 7 -3 3.23 0.78
 -17 7 3 2.72 0.5
 -17 -7 -3 4.48 1.02
 -17 7 3 2.64 0.54
 17 7 -3 3.36 1.46
 -17 -7 -3 2.99 0.67
 17 8 3 0.83 0.98
 -17 -8 3 -0.39 1.07
 17 8 3 -0.01 0.81
 17 8 3 -0.82 0.74
 -17 -8 3 -0.5 0.82
 -17 -8 3 0.09 0.97
 -17 -8 3 -0.55 0.84
 17 8 -3 -0.63 0.82
 17 8 -3 0.17 0.86
 -17 -8 -3 -0.88 0.78
 -17 -8 -3 0.53 0.73
 -17 -8 -3 0.53 0.96
 17 8 -3 0.13 0.85
 -17 -9 3 -0.2 0.83
 -17 -9 3 1.7 1.2
 -17 -9 3 -0.66 1.03
 17 9 3 0.22 1.02
 17 9 3 -0.11 0.8
 17 9 3 -1.31 0.85
 17 -9 -3 -0.06 0.7
 17 9 -3 -0.15 0.9
 -17 -9 -3 0.47 0.82
 -17 9 3 0.39 0.77
 -17 -9 -3 1.42 0.91
 -17 -9 -3 1.21 1.02
 17 9 -3 -0.61 0.92
 -17 -9 -3 -1.66 1.11
 -17 9 3 -0.74 0.64
 -17 9 3 0.58 0.69
 17 -10 -3 0.15 0.65
 -17 -10 3 -1.29 1.23
 17 10 3 -0.26 1
 17 10 3 0.29 1.05
 -17 -10 3 -0.99 1.12
 17 10 -3 -0.71 1.07
 -17 10 3 -1.18 0.72
 -17 -10 -3 2.05 1.24
 -17 -10 -3 1.65 0.97
 17 10 -3 -0.89 0.98
 -17 -10 -3 2.59 1.21
 -18 0 -3 0.82 0.72
 -18 0 -3 0.9 0.65
 -18 0 3 1.39 0.73
 -18 1 -3 0.63 0.69
 -18 -1 3 1.27 0.55
 -18 1 -3 1.97 0.64
 -18 -1 -3 0.47 0.65
 -18 -1 -3 1.25 0.74
 -18 1 3 0.72 0.49
 -18 1 3 2.35 1.25
 -18 -2 3 5.33 0.93
 -18 2 -3 5.72 0.72
 -18 2 -3 6.48 0.75
 -18 -2 3 5.98 0.67
 -18 2 3 5.46 0.53
 -18 -2 -3 6.94 0.84
 -18 2 3 7.37 0.83
 -18 3 -3 9.84 0.8
 -18 -3 3 10.52 1.05
 -18 3 -3 8.42 0.8
 -18 3 3 8.76 0.59
 -18 -3 -3 8.7 1
 -18 -3 -3 9.44 0.92
 -18 4 -3 1.29 0.61
 -18 -4 3 0.45 0.87
 -18 4 3 -0.84 0.6
 -18 4 3 0.16 0.44
 -18 -4 -3 1.73 0.83
 -18 -4 -3 2.61 1.38
 -18 -5 3 5.74 1.02
 -18 5 -3 4.55 0.67
 -18 -5 3 5.44 0.86
 18 5 -3 4.85 0.7
 18 5 -3 4.11 0.78
 -18 -5 -3 5.09 1.01
 -18 5 3 5.48 0.52
 -18 -5 -3 4.65 0.94
 -18 -6 3 2.43 0.86
 -18 -6 3 1.22 0.71
 -18 -6 3 3.1 1
 18 6 3 2.26 0.9
 -18 -6 3 1.62 0.64
 -18 6 -3 1.96 0.61
 -18 -6 -3 1.9 0.95
 -18 6 3 0.97 0.49
 -18 6 3 1.73 0.57
 -18 6 3 2.05 0.47
 -18 -6 -3 1.49 0.98
 18 6 -3 2.23 0.8
 18 6 -3 2.42 0.68
 -18 -7 3 1.05 0.79
 18 7 3 0.55 0.64
 -18 -7 3 1.61 0.72
 18 7 3 1.76 0.95
 -18 7 -3 0.37 0.66
 -18 -7 3 3.09 0.96
 18 7 -3 2.19 0.87
 -18 -7 -3 1.66 0.77
 -18 -7 -3 1.49 1.08
 -18 7 3 1.91 0.57
 18 7 -3 1.01 0.79
 -18 7 3 1.32 0.55
 -18 -8 3 0.46 1.08
 18 8 3 0.05 0.72
 -18 -8 3 0.77 0.85
 -18 8 -3 0.96 0.69
 -18 -8 3 1.68 0.83
 18 8 3 0.76 1.05
 -18 -8 3 2.58 1.01
 18 8 -3 0.99 0.83
 -18 -8 -3 -0.95 1.06
 -18 8 3 -0.38 0.49
 18 8 -3 2.51 0.9
 18 8 -3 0.41 0.87
 -18 -8 -3 0.51 0.73
 -18 8 3 -0.61 0.6
 -18 -9 3 2.61 0.99
 -18 -9 3 4.68 1.31
 -18 -9 3 4.67 1.17
 18 9 3 3.22 0.86
 18 9 3 5.26 1.13
 -18 -9 3 5.47 1.01
 18 9 3 4.03 0.99
 18 9 -3 3.41 1.07
 18 9 -3 4.06 1.07
 -18 9 3 3.09 0.7
 -18 -9 -3 3.72 1.28
 18 9 -3 3.25 0.95
 -18 -9 -3 3.19 1.26
 -18 -9 -3 2.67 0.93
 -19 0 -3 -0.1 0.67
 -19 0 3 0.82 0.8
 -19 0 -3 0.12 0.75
 -19 -1 3 1.7 0.83
 -19 1 -3 0.73 0.66
 -19 1 -3 1.9 0.89
 -19 -1 3 0.6 0.58
 -19 -1 -3 0.92 0.72
 -19 1 3 0.8 0.77
 -19 -1 -3 1.39 0.76
 -19 -2 3 1.63 0.93
 -19 2 -3 -0.24 0.65
 -19 -2 3 1.93 0.64
 -19 2 -3 0.79 0.7
 -19 2 3 0.54 0.48
 -19 -2 -3 1.43 0.83
 -19 2 3 0.14 0.75
 -19 -3 3 2.39 0.68
 -19 -3 3 1.71 0.97
 -19 -3 -3 2.57 0.85
 -19 -3 -3 3.64 1.45
 -19 4 -3 1.93 0.66
 -19 -4 3 1.67 0.96
 -19 -4 3 0.55 0.75
 -19 4 3 1.72 0.68
 -19 5 -3 2.27 0.66
 -19 -5 3 1.96 0.84
 -19 -5 3 3.66 1.05
 -19 -5 -3 1.35 1.01
 -19 -6 3 0.19 0.71
 -19 -6 3 -0.41 0.9
 -19 -6 3 0.65 1.11
 -19 6 3 0.95 0.6
 19 6 -3 0.48 1.41
 -19 -6 -3 0.93 1
 19 6 -3 -0.71 0.75
 19 6 -3 1.56 0.62
 -19 -6 -3 2.35 0.97
 -19 -7 3 0.43 0.72
 19 7 3 1.29 1
 -19 -7 3 1.55 1.01
 -19 7 -3 1.36 0.66
 19 7 -3 0.7 0.88
 -19 7 3 0.07 0.53
 -19 -7 -3 2.74 1.1
 -20 0 -3 0.02 0.71
 -20 0 -3 0.53 0.78
 -20 0 3 -0.56 0.81
 -20 1 -3 5.52 0.8
 -20 1 -3 7.19 0.9
 -20 -1 3 5.54 0.68
 -20 -1 3 6.19 1.01
 -20 -1 -3 6.14 0.97
 -20 1 3 4.91 0.61
 -20 -1 -3 6.3 0.83
 -20 1 3 7.71 0.96
 -20 -2 3 1.24 0.92
 -20 2 -3 0.87 0.71
 -20 -2 3 1.32 0.66
 -20 -2 -3 0.51 0.91
 -20 2 3 -0.86 0.77
 -20 2 3 -0.28 0.49
 -20 -3 3 2.71 1.07
 -20 3 -3 3.65 0.82
 -20 3 -3 4.42 0.73
 -20 -3 -3 3.6 1.02
 -20 -4 3 0.08 0.99
 -20 -4 3 3.21 0.82
 -20 4 -3 1.76 0.72
 -20 -4 -3 1.37 1.1
 -20 -5 3 1.63 0.85
 -20 -5 3 3.15 1.11
 -20 -5 -3 3.51 0.98
 -20 -5 -3 -0.09 1.13
 -20 6 3 0.8 0.67
 -21 0 3 0.05 0.94
 -21 0 -3 -0.15 0.76
 -21 0 -3 -0.74 0.82
 -21 -1 3 1.99 1.01
 -21 1 -3 0.06 0.79
 -21 -1 3 -1 0.63
 -21 1 -3 -0.58 0.75
 -21 1 3 -0.24 0.56
 -21 -1 -3 0.45 0.88
 -21 1 3 -1.38 0.91
 -21 -2 3 -1.34 0.71
 -21 2 -3 -1.16 0.7
 -21 -2 3 -0.77 0.97
 -21 2 -3 0.3 0.81
 -21 -2 -3 1.7 0.89
 -21 -2 -3 2.03 0.98
 -21 -3 3 -0.72 1.03
 -21 3 3 -0.17 0.79
 -21 -3 -3 0.79 1.06
 0 0 -4 3.01 0.32
 0 0 4 2.75 0.34
 0 0 -4 2.52 0.28
 0 0 -4 2.71 0.32
 0 0 4 2.53 0.27
 0 0 4 2.73 0.35
 0 -1 -4 -0.29 0.27
 0 1 4 0.06 0.36
 0 -1 4 -0.16 0.36
 0 1 4 0 0.26
 0 1 -4 0.25 0.25
 0 1 -4 -0.09 0.34
 0 -1 -4 0.14 0.34
 0 1 -4 -0.09 0.32
 0 -1 -4 -0.31 0.34
 0 -1 4 0.15 0.33
 0 -2 -4 564.21 13.89
 0 2 -4 584.6 13.87
 0 -2 4 570.55 13.86
 0 -2 4 578.68 13.89
 0 2 -4 573.91 13.89
 0 -2 4 564.8 13.89
 0 -2 -4 574.18 13.89
 0 2 4 576.22 13.87
 0 2 4 568.12 13.89
 0 -2 -4 577.73 13.87
 0 2 4 574.39 13.89
 0 2 -4 591.45 13.89
 0 3 -4 -0.02 0.43
 0 3 4 -0.19 0.42
 0 3 4 0.51 0.36
 0 -3 4 0.05 0.44
 0 -3 -4 -0.59 0.45
 0 -3 4 0.41 0.3
 0 -3 -4 0.02 0.49
 0 3 -4 0.53 0.29
 0 3 4 0.88 0.48
 0 -3 4 -0.15 0.44
 0 -3 -4 -0.2 0.35
 0 3 -4 0.18 0.44
 0 -4 4 31.36 1.02
 0 -4 -4 31.27 1.15
 0 4 4 31 1.16
 0 -4 4 30.88 1.16
 0 -4 4 30.19 1.14
 0 4 -4 31.16 1.14
 0 4 -4 31.32 1
 0 -4 -4 32.08 1.17
 0 4 4 33.06 1.17
 0 4 -4 30.86 1.15
 0 4 4 31.73 1.06
 0 -4 -4 32.07 1.06
 0 -5 4 0.43 0.33
 0 -5 4 -0.27 0.52
 0 -5 -4 0.49 0.55
 0 5 4 0.65 0.58
 0 5 -4 0.02 0.33
 0 5 4 -0.55 0.5
 0 -5 -4 -0.14 0.42
 0 5 -4 -0.62 0.54
 0 5 -4 -0.2 0.47
 0 5 4 0.3 0.44
 0 -5 4 -0.31 0.48
 0 -5 -4 -0.05 0.48
 0 6 4 304.15 7.51
 0 -6 4 302.03 7.51
 0 -6 4 301.68 7.51
 0 6 -4 291.94 7.5
 0 6 -4 302.5 7.5
 0 6 4 297.63 7.51
 0 6 -4 305.34 7.51
 0 -6 4 313.7 7.43
 0 6 4 310.9 7.49
 0 -6 -4 308.12 7.49
 0 -6 -4 306.22 7.51
 0 -6 -4 297.94 7.51
 0 -7 4 -0.26 0.6
 0 -7 -4 -1.04 0.5
 0 -7 4 0.43 0.38
 0 7 -4 -0.34 0.61
 0 7 4 0.23 0.62
 0 7 4 -0.33 0.5
 0 7 -4 0.14 0.54
 0 7 -4 -0.76 0.57
 0 7 4 -0.24 0.64
 0 -7 -4 -0.59 0.62
 0 -7 -4 -0.41 0.58
 0 -7 4 0.64 0.59
 0 -8 -4 6.03 0.69
 0 -8 -4 6.49 0.83
 0 8 4 6.51 0.64
 0 8 4 7.49 0.83
 0 8 -4 6.32 0.76
 0 8 -4 5.6 0.64
 0 -8 4 6.24 0.5
 0 8 4 4.98 0.73
 0 -8 4 7.96 0.8
 0 -8 -4 6.11 0.64
 0 -8 4 5.6 0.67
 0 8 -4 7.54 0.77
 0 -9 4 -0.98 0.67
 0 9 4 0.02 0.65
 0 -9 4 -1.19 0.75
 0 9 -4 -0.26 0.65
 0 -9 -4 -0.25 0.59
 0 9 4 -0.47 0.68
 0 9 -4 -0.13 0.68
 0 9 4 -0.21 0.6
 0 -9 -4 -0.49 0.65
 0 9 -4 -0.07 0.59
 0 -9 -4 0.68 0.73
 0 -10 4 30.14 1.52
 0 10 4 27.9 1.54
 0 10 -4 31.25 1.53
 0 10 4 29.65 1.52
 0 10 -4 28.6 1.55
 0 -10 -4 27.12 1.4
 0 -10 -4 26.78 1.48
 0 10 -4 25.96 1.43
 0 -10 4 30.08 1.54
 0 -11 4 -0.47 0.8
 0 11 -4 0.57 0.88
 0 11 4 -0.67 0.73
 0 11 -4 -0.59 0.8
 0 -11 4 0.18 0.53
 0 -11 -4 0.59 0.75
 0 11 -4 0.15 0.71
 0 11 4 -0.91 0.81
 0 -11 4 0.22 0.82
 0 11 4 -0.83 0.84
 0 -11 -4 0.19 0.84
 0 -11 -4 -1.02 0.75
 0 12 -4 0.36 0.84
 0 -12 4 -0.04 0.54
 0 12 4 0.14 0.94
 0 12 -4 -1.59 0.87
 0 -12 -4 0.58 0.85
 0 12 -4 0.12 0.94
 0 -12 -4 0.15 1.29
 0 -12 4 -0.48 0.93
 0 12 4 0.6 0.81
 0 13 4 0.45 0.92
 0 -13 -4 0.1 1.18
 0 13 -4 -1.41 0.91
 0 13 -4 -0.28 0.93
 0 -13 4 0.07 1.01
 0 -13 4 -0.77 0.58
 0 13 4 0.48 0.97
 0 13 4 -0.9 0.99
 0 -13 4 -1.4 1.02
 0 14 4 15.24 1.25
 0 14 -4 15.24 1.32
 0 14 -4 13.28 1.21
 0 -14 4 15.35 1.32
 0 -14 -4 14.53 1.36
 0 14 -4 14.51 1.31
 0 -14 -4 16.42 1.3
 0 -14 4 14.34 1.29
 0 -14 4 15.79 1.33
 0 14 4 15.15 1.33
 0 -15 -4 -1.18 1.12
 0 -15 4 1.57 1.06
 0 -15 4 -1.41 1.17
 0 15 4 -0.39 1.06
 0 15 4 0.08 1.13
 0 15 -4 -0.51 1.07
 0 15 -4 2 1.2
 0 -15 4 0.89 0.67
 0 15 4 -1.33 1.21
 0 15 -4 1.84 1.01
 0 -15 -4 0.43 1.16
 0 16 4 1.45 1.35
 0 -16 4 1.04 1.22
 0 16 4 -0.09 1.24
 0 -16 4 -0.13 1.2
 0 -16 -4 1.06 1.27
 0 -16 4 0.51 0.71
 0 -16 -4 0.01 0.97
 0 16 -4 -1.08 1.27
 0 16 4 0.43 1.18
 0 16 -4 -1.26 1.08
 0 17 4 1.29 1.34
 0 17 -4 2.52 1.42
 0 -17 4 -0.59 1.55
 0 -17 -4 -0.25 1.35
 0 -17 4 -1.2 0.74
 0 17 -4 -0.23 1.16
 1 0 -4 0.69 0.26
 1 0 4 0.26 0.31
 1 0 -4 0.46 0.32
 1 0 -4 0.39 0.32
 -1 0 -4 0.58 0.31
 -1 0 -4 0.45 0.29
 -1 0 4 0.43 0.27
 1 0 4 0.16 0.3
 -1 0 4 0.77 0.33
 -1 -1 4 3.15 0.4
 1 1 4 2.33 0.32
 -1 -1 4 2.37 0.33
 -1 -1 -4 2.66 0.38
 -1 1 4 2.25 0.26
 -1 2 -4 45.99 1.35
 -1 -2 4 45.85 1.33
 1 -2 -4 46.76 1.37
 1 -2 -4 44.4 1.37
 -1 -2 4 47.84 1.4
 1 2 4 47.04 1.37
 -1 -2 4 45.97 1.37
 1 2 4 43.91 1.37
 1 2 4 45.14 1.32
 -1 2 -4 44.86 1.35
 1 -2 -4 46.05 1.26
 -1 2 4 45.32 1.38
 -1 -2 -4 45.12 1.36
 -1 -2 -4 43.56 1.36
 -1 2 4 44.44 1.26
 -1 -2 -4 47.42 1.33
 -1 2 4 47.33 1.36
 1 -2 4 47.13 1.35
 1 -2 4 46.68 1.35
 1 2 -4 47.44 1.37
 1 2 -4 46.11 1.32
 1 2 -4 48.01 1.39
 1 3 4 8.11 0.52
 1 -3 -4 7.04 0.53
 -1 3 -4 7.93 0.51
 -1 -3 4 7.55 0.68
 -1 3 -4 7.84 0.53
 1 -3 -4 7.21 0.56
 1 3 4 7.5 0.55
 1 -3 -4 7.57 0.62
 1 3 4 7.98 0.49
 -1 -3 4 8.84 0.62
 -1 -3 4 9.23 0.6
 -1 3 4 8.23 0.61
 -1 -3 -4 9.35 0.57
 -1 3 4 9.41 0.59
 -1 -3 -4 8.32 0.57
 1 3 -4 8.8 0.66
 -1 -3 -4 7.62 0.67
 1 3 -4 8.39 0.59
 1 -3 4 7.61 0.54
 -1 3 4 8.41 0.55
 1 -3 4 8.28 0.54
 -1 -4 4 26.7 1.11
 1 -4 -4 28.98 1.09
 1 -4 -4 27.21 1.11
 1 -4 -4 29.56 0.99
 1 4 4 28.14 1.1
 1 4 4 30.07 1.05
 -1 4 -4 28.4 1.08
 -1 -4 4 29.97 1.12
 -1 -4 4 27.8 1
 -1 4 -4 27.08 1.08
 1 4 4 28.38 1.11
 -1 4 -4 28.36 0.89
 -1 -4 -4 27.79 1.1
 -1 -4 -4 28.69 1.09
 1 -4 4 29.83 0.9
 1 -4 4 28.98 1.08
 -1 4 4 28.57 1.11
 1 4 -4 27.72 0.99
 -1 4 4 28.93 1
 1 4 -4 28.25 1.1
 1 -4 4 30.05 1.1
 -1 4 4 27.59 1.1
 -1 -4 -4 28.41 1.03
 1 4 -4 28.8 1.1
 -1 -5 4 14.66 0.95
 1 5 4 14.88 0.88
 -1 5 -4 15.61 0.95
 1 5 4 16.29 0.97
 -1 -5 4 15.04 0.83
 1 -5 -4 15.62 0.82
 -1 -5 4 13.39 0.95
 -1 5 -4 13.39 0.92
 1 -5 -4 14.94 0.95
 1 5 4 13.99 0.98
 -1 5 -4 14.29 0.68
 1 -5 -4 13.98 0.94
 1 -5 4 15.46 0.68
 -1 5 4 15.52 0.84
 -1 5 4 16.04 1
 1 -5 4 14.41 0.95
 -1 -5 -4 15.86 0.98
 1 5 -4 14.36 0.81
 1 5 -4 13.82 0.94
 1 5 -4 14 0.97
 -1 5 4 15.59 0.97
 -1 -5 -4 15.21 0.86
 1 -5 4 13.76 0.93
 1 5 -4 16.04 0.94
 -1 6 -4 2.47 0.61
 1 -6 -4 1.43 0.54
 1 6 4 2.54 0.62
 -1 -6 4 2.14 0.43
 1 -6 -4 2.92 0.6
 1 6 4 2.39 0.62
 -1 -6 4 2.58 0.61
 1 6 4 1.49 0.52
 -1 -6 4 2.23 0.61
 1 -6 -4 2.4 0.52
 1 6 -4 1.65 0.56
 -1 6 4 2.56 0.51
 1 -6 4 2.36 0.63
 -1 6 4 2.22 0.65
 -1 -6 -4 3.14 0.6
 -1 -6 -4 2.48 0.54
 -1 6 4 2.41 0.61
 -1 -6 -4 2.25 0.62
 1 6 -4 2.65 0.62
 1 6 -4 2.29 0.52
 -1 -7 4 2.01 0.44
 -1 7 -4 1.58 0.63
 1 -7 -4 1.81 0.64
 1 7 4 2.06 0.53
 1 7 4 2.11 0.64
 1 -7 -4 3.18 0.56
 1 7 4 1.58 0.62
 -1 -7 4 1.64 0.59
 -1 -7 4 2.57 0.59
 1 -7 -4 1.58 0.57
 -1 7 -4 2.09 0.6
 -1 7 4 3.12 0.65
 1 -7 4 2.02 0.36
 -1 -7 -4 2.12 0.56
 -1 -7 -4 2.09 0.59
 1 7 -4 2.21 0.57
 -1 7 4 2.87 0.56
 1 -7 4 2.11 0.63
 -1 -7 -4 1.07 0.63
 -1 7 4 1.81 0.62
 1 7 -4 2.5 0.59
 1 -7 4 1.68 0.63
 -1 -8 4 13.99 1.14
 -1 8 -4 12.03 1.08
 1 -8 -4 12.58 1.11
 1 -8 -4 12.2 0.84
 -1 -8 4 12.4 0.91
 -1 8 -4 12.29 1.04
 1 8 4 12.59 0.84
 1 8 4 13.1 0.87
 1 -8 -4 12.8 1.03
 -1 8 -4 13.34 0.86
 1 8 4 12.21 1.03
 -1 -8 4 12.68 0.92
 1 8 -4 14.7 1.08
 -1 8 4 11.05 0.99
 -1 -8 -4 13.15 0.87
 -1 8 4 13.73 1.14
 1 -8 4 11.41 0.82
 -1 8 4 14.08 0.9
 1 -8 4 12.53 0.84
 -1 -8 -4 12.82 0.88
 1 8 -4 13.93 1.12
 -1 -8 -4 12.87 1.03
 1 8 -4 12.43 0.87
 1 9 4 3.58 0.73
 -1 9 -4 3.4 0.7
 -1 -9 4 4.32 0.52
 -1 -9 4 4.31 0.73
 -1 -9 4 3.85 0.76
 1 -9 -4 4.07 0.73
 -1 9 -4 4.15 0.69
 1 -9 -4 3.72 0.65
 -1 9 -4 5.94 0.75
 1 -9 -4 5.35 0.72
 1 9 4 3.54 0.66
 1 9 4 5.45 0.82
 1 9 -4 5.18 0.69
 1 -9 4 5.04 0.71
 1 9 -4 4.73 0.78
 -1 -9 -4 4.56 0.67
 -1 9 4 4.84 0.73
 -1 9 4 5.12 0.8
 -1 -9 -4 5.33 0.74
 1 -9 4 4.09 0.46
 1 -9 4 5.07 0.79
 -1 -9 -4 5.22 0.8
 -1 9 4 4.69 0.64
 1 10 4 1.16 0.81
 -1 -10 4 1.05 0.74
 -1 -10 4 1.9 0.81
 1 -10 -4 1.87 0.77
 -1 10 -4 1.91 0.77
 -1 10 -4 2.38 0.73
 1 10 4 2.04 0.66
 -1 10 -4 2.53 0.71
 1 -10 -4 3.29 0.76
 1 10 4 1.49 0.81
 -1 -10 4 0.81 0.51
 1 -10 -4 1.34 0.69
 -1 10 4 0.7 0.73
 -1 -10 -4 1.68 0.68
 1 -10 4 2.87 0.75
 1 10 -4 2.93 0.86
 1 -10 4 1.63 0.79
 1 10 -4 1.58 0.81
 1 10 -4 2.36 0.72
 -1 -10 -4 0.9 0.78
 1 -10 4 1.92 0.46
 -1 10 4 3.28 0.87
 -1 -10 -4 2.18 0.81
 -1 10 4 0.84 0.67
 1 11 4 6.51 0.99
 -1 -11 4 6.17 1.02
 -1 11 -4 4.33 0.88
 -1 11 -4 6 0.88
 -1 11 -4 5.95 0.87
 1 -11 -4 5.63 0.85
 1 11 4 7.52 0.91
 -1 -11 4 6.6 0.93
 1 -11 -4 5.84 0.98
 1 -11 -4 7.16 0.95
 -1 -11 4 6.29 0.63
 1 11 4 5.85 0.92
 1 11 -4 5 0.87
 1 -11 4 5.77 0.88
 -1 -11 -4 5.44 0.82
 -1 -11 -4 7.85 1.03
 1 11 -4 5.95 0.88
 -1 11 4 8.07 1.05
 1 -11 4 5.77 1.01
 -1 11 4 5.23 0.82
 -1 11 4 7.38 0.93
 -1 -11 -4 5.62 1.03
 -1 -12 4 0.61 0.6
 1 12 4 1.86 0.96
 -1 12 -4 -0.16 0.9
 1 -12 -4 0.49 0.94
 1 -12 -4 0.32 0.86
 1 12 4 -1.46 0.94
 -1 12 -4 0.33 0.87
 -1 12 -4 0.6 0.84
 1 -12 4 1.34 0.97
 -1 -12 -4 0.68 0.88
 -1 -12 -4 -0.2 0.9
 1 12 -4 -0.13 0.8
 -1 -12 -4 0.58 0.93
 1 12 -4 0.65 0.86
 -1 12 4 -0.97 0.92
 -1 12 4 0.41 0.91
 1 -12 4 -0.72 0.92
 1 -12 4 -0.53 0.51
 1 12 -4 -0.5 0.86
 -1 12 4 0.57 0.8
 1 13 4 6.36 1
 1 13 4 6.98 1.13
 1 13 4 6.99 1.15
 -1 13 -4 7.53 1.13
 -1 -13 4 7.38 1.31
 -1 13 -4 7.79 1.03
 -1 13 -4 7.65 1.13
 -1 -13 4 8.27 0.76
 1 -13 -4 7.45 1.18
 1 -13 4 8.4 1.01
 1 13 -4 7.31 1.12
 1 -13 4 8.44 1.24
 -1 13 4 7.36 1.08
 -1 -13 -4 8.3 1.13
 -1 -13 -4 7.06 1.03
 -1 13 4 9.73 1.66
 1 13 -4 7.62 1.04
 -1 13 4 6.88 1.03
 1 13 -4 7.66 1.03
 -1 -14 4 1.03 0.69
 1 -14 -4 -0.88 0.96
 -1 14 -4 2.61 1.17
 -1 -14 4 0.75 0.9
 1 -14 -4 -0.78 1.02
 1 14 4 0.33 1.1
 1 14 4 -0.1 1
 -1 14 4 1.38 1.08
 1 -14 4 0.94 1.29
 1 -14 4 1.14 0.99
 1 14 -4 0.73 0.96
 -1 -14 -4 1.18 1.07
 1 14 -4 1.33 1.03
 -1 14 4 -0.14 1.02
 -1 -14 -4 -0.3 1.04
 -1 14 4 1.49 1.04
 1 -14 4 0.45 0.58
 -1 15 -4 -0.34 1.22
 -1 15 -4 -1.35 0.98
 1 -15 -4 -0.54 1.19
 -1 -15 4 -1.86 1.13
 1 15 4 -0.98 1.06
 -1 15 -4 -2.03 1.16
 -1 -15 4 -0.44 1.04
 1 15 4 -0.25 1.15
 1 15 4 -0.43 1.04
 -1 -15 4 -0.91 0.74
 1 15 -4 -1.37 1.11
 -1 15 4 -2.14 1.22
 -1 -15 -4 -0.85 1.14
 1 -15 4 -0.99 0.59
 -1 -15 -4 -0.86 1.19
 1 15 -4 0.44 1.17
 -1 15 4 1.85 1.06
 -1 15 4 2.28 1.21
 1 -15 4 -0.31 1.1
 1 -15 4 -1.88 1.1
 1 15 -4 -2.27 1.06
 1 16 4 -0.53 1.18
 1 -16 -4 0.18 1.12
 -1 -16 4 0.66 1.12
 -1 16 -4 0.46 1.12
 1 -16 -4 -2.4 1.23
 1 16 4 2.58 1.42
 -1 -16 4 -1.33 0.77
 1 -16 -4 0.3 0.79
 -1 16 -4 0.66 1.24
 -1 -16 4 0.28 1.29
 1 16 4 -0.17 1.26
 -1 -16 -4 0.68 0.84
 1 -16 4 -1.78 1.12
 -1 -16 -4 2.66 1.23
 -1 -16 -4 1.95 1.3
 1 16 -4 -0.19 1.31
 1 -16 4 0.89 1.37
 -1 16 4 -1.07 1.27
 1 16 -4 0.39 1.26
 1 -16 4 -0.12 0.68
 -1 16 4 -0.29 1.37
 -1 17 -4 -0.64 1.37
 -1 17 -4 -2.39 1.37
 1 17 4 -0.71 1.33
 1 -17 -4 -0.81 1.38
 -1 -17 4 0.12 1.26
 1 17 4 -0.36 1.3
 -1 -17 4 0.64 1.35
 1 -17 -4 -1.32 1.43
 1 -17 4 -2.54 1.25
 -1 -17 -4 -1.84 1.38
 -1 17 4 1.94 1.35
 1 17 -4 0.69 1.32
 1 -17 4 -2.47 1.37
 -1 17 4 0.5 1.42
 -1 -17 -4 -1.64 0.89
 2 0 -4 300.59 7.13
 -2 0 -4 298.54 7.11
 2 0 -4 291.02 7.13
 -2 0 4 286.72 7.13
 2 0 4 289.12 7.11
 2 0 4 297.3 7.11
 -2 0 -4 289.58 7.11
 -2 0 4 295.36 7.13
 2 -1 -4 89.54 2.31
 -2 -1 4 88.66 2.32
 2 1 4 92.21 2.31
 2 -1 -4 89.06 2.32
 2 -1 -4 88.84 2.31
 -2 -1 4 94.29 2.34
 2 1 4 90.01 2.3
 -2 -1 4 91.43 2.32
 -2 1 -4 89.62 2.28
 2 -1 -4 92.4 2.22
 2 1 4 87.85 2.3
 -2 1 -4 88.41 2.28
 -2 1 4 88.75 2.31
 -2 1 4 88.22 2.31
 2 1 -4 90.24 2.32
 -2 -1 -4 88.5 2.29
 2 -1 4 90.49 2.29
 2 1 -4 92.47 2.33
 2 -1 4 89.22 2.28
 -2 -1 -4 93.9 2.31
 -2 1 4 90.03 2.31
 2 1 -4 91.49 2.33
 -2 -1 -4 87.32 2.29
 -2 -2 4 26.51 0.99
 -2 2 -4 26.55 0.94
 2 -2 -4 27.02 0.81
 -2 -2 4 25.72 1.02
 2 2 4 26.33 0.98
 2 2 4 25.82 0.98
 2 -2 -4 28.45 0.91
 -2 2 -4 26.82 0.94
 2 2 4 26.42 0.96
 2 -2 -4 25.42 0.98
 2 -2 -4 26.03 0.96
 -2 -2 4 26.76 0.98
 -2 -2 -4 28.02 0.97
 -2 2 4 28.41 0.95
 2 2 -4 26.35 0.97
 2 2 -4 26.8 1
 -2 -2 -4 25.62 0.98
 -2 2 4 25.86 0.8
 2 -2 4 26.14 0.94
 -2 2 4 26.29 0.98
 2 -2 4 25.55 0.92
 2 2 -4 25.89 1
 2 -3 -4 3.13 0.5
 2 -3 -4 2.84 0.34
 -2 3 -4 2.57 0.44
 -2 -3 4 2.04 0.38
 2 -3 -4 3.47 0.37
 2 3 4 2.59 0.41
 -2 3 -4 3 0.24
 -2 3 -4 2.63 0.41
 2 3 4 2.21 0.44
 2 -3 -4 2.37 0.43
 -2 -3 4 3.03 0.52
 -2 -3 4 2.34 0.47
 2 3 4 2.74 0.46
 -2 -3 -4 2.69 0.48
 2 -3 4 2.56 0.43
 2 3 -4 2.81 0.51
 -2 3 4 3.35 0.49
 2 3 -4 2.76 0.47
 -2 3 4 2.92 0.34
 -2 -3 -4 2.59 0.45
 2 3 -4 2.39 0.37
 2 -3 4 2.91 0.47
 -2 -3 -4 1.91 0.4
 2 3 -4 2.99 0.42
 -2 3 4 3.23 0.49
 2 -4 -4 4.16 0.54
 2 4 4 3.03 0.46
 2 -4 -4 3.27 0.39
 2 4 4 2.4 0.52
 -2 4 -4 3.54 0.51
 -2 4 -4 2.95 0.26
 -2 -4 4 2.11 0.48
 -2 4 -4 3.12 0.46
 2 4 4 2.9 0.5
 -2 -4 4 2.61 0.48
 2 -4 -4 3.41 0.51
 -2 -4 4 2.42 0.4
 -2 4 4 3.11 0.4
 2 4 -4 3.81 0.57
 -2 4 4 3.37 0.5
 2 4 -4 3.61 0.47
 -2 -4 -4 3.33 0.53
 -2 -4 -4 2.82 0.43
 2 4 -4 3.58 0.56
 2 -4 4 2.67 0.53
 2 -4 4 2.26 0.49
 -2 -4 -4 2.91 0.52
 -2 -5 4 117.99 3.04
 2 5 4 121 3.08
 2 -5 -4 119.86 3.07
 -2 -5 4 114.47 3.08
 2 5 4 120.74 3.07
 -2 -5 4 114.84 3.08
 -2 5 -4 115.92 3.05
 2 -5 -4 117.61 3.07
 2 5 4 116.77 3.08
 -2 5 -4 117.25 3.05
 2 -5 -4 119.06 3.01
 2 5 -4 112.37 3.08
 -2 -5 -4 118.29 3.05
 2 -5 4 115.41 2.9
 2 -5 4 117.35 3.06
 2 -5 4 116.19 3.06
 2 5 -4 117.81 3.04
 2 5 -4 118.4 3.06
 2 5 -4 115.56 3.08
 -2 5 4 117.73 3.08
 -2 -5 -4 113.31 3.07
 -2 5 4 119.84 3.07
 -2 5 4 119.97 3.02
 -2 -5 -4 117.65 3.07
 2 -6 -4 18.6 1.08
 -2 6 -4 18.9 1.05
 -2 -6 4 16.9 0.98
 2 -6 -4 18.3 1.09
 2 6 4 18.34 1.05
 -2 -6 4 19.16 1.12
 2 6 4 19.29 1.14
 2 6 4 18.31 1.09
 -2 -6 4 20.34 1.1
 2 6 -4 18.17 1.09
 2 -6 4 19.25 1.08
 -2 -6 -4 20.23 1.05
 -2 -6 -4 18.14 1.09
 2 -6 4 18.27 1.06
 -2 6 4 20.4 1.11
 2 -6 4 18.91 0.72
 -2 -6 -4 18.85 1.08
 2 6 -4 21.08 1.06
 -2 6 4 17.87 1.1
 -2 -7 4 18.26 1.14
 2 -7 -4 18.23 1.08
 -2 7 -4 18.5 1.11
 2 -7 -4 16.16 1.1
 2 -7 -4 18.93 1.02
 -2 -7 4 18.14 1.14
 2 7 4 17.19 1.16
 2 7 4 19.28 1.14
 -2 7 -4 17.81 1.06
 -2 -7 4 16.49 1.03
 2 7 4 18.68 1.09
 2 -7 4 16.86 0.75
 -2 -7 -4 18.47 1.14
 2 -7 4 18.65 1.1
 -2 7 4 18.11 1.14
 -2 7 4 17.06 0.97
 -2 -7 -4 17.04 1.15
 2 -7 4 18.39 1.13
 2 7 -4 18.86 1.09
 -2 7 4 17.03 1.16
 2 7 -4 19.48 1.13
 -2 -7 -4 18.26 1.07
 2 -8 -4 35.7 1.39
 -2 8 -4 34.54 1.43
 2 8 4 38.49 1.52
 -2 8 -4 35.76 1.44
 -2 8 -4 34.76 1.46
 -2 -8 4 36.6 1.5
 2 8 -4 34.47 1.44
 2 -8 4 38.16 1.48
 -2 -8 -4 36.59 1.48
 -2 -8 -4 34.4 1.42
 -2 -8 -4 38.29 1.5
 -2 8 4 37.61 1.48
 2 8 -4 39.06 1.51
 2 -8 4 39.17 1.49
 -2 9 -4 0.82 0.62
 2 -9 -4 -0.31 0.62
 2 -9 -4 1.5 0.62
 2 9 4 1.04 0.69
 -2 9 -4 1.46 0.68
 -2 -9 4 0.97 0.76
 -2 9 -4 0.92 0.71
 -2 -9 4 0.47 0.7
 2 -9 -4 1.33 0.66
 -2 -9 4 1.29 0.51
 2 9 4 0.84 0.62
 2 9 4 1.58 0.74
 2 -9 4 0.59 0.38
 2 9 -4 1.17 0.6
 -2 9 4 1.17 0.71
 2 -9 4 0.6 0.68
 2 -9 4 1.32 0.69
 -2 -9 -4 0.65 0.68
 -2 -9 -4 0.82 0.72
 2 9 -4 2.07 0.73
 -2 9 4 1.26 0.6
 2 9 -4 0.5 0.76
 -2 9 4 0.77 0.75
 -2 -9 -4 1.23 0.64
 -2 10 -4 1.41 0.73
 2 10 4 2.17 0.74
 -2 -10 4 0.27 0.53
 2 10 4 0.6 0.77
 -2 10 -4 1.31 0.79
 2 -10 -4 0.4 0.71
 2 10 4 0.94 0.81
 -2 10 -4 1.56 0.73
 2 -10 -4 2.18 0.69
 -2 -10 4 1.55 0.81
 2 -10 -4 0.79 0.79
 -2 -10 4 1.03 0.72
 2 10 -4 0.78 0.67
 -2 10 4 1.73 0.76
 -2 10 4 0.33 0.63
 2 10 -4 2.76 0.86
 -2 -10 -4 0.6 0.87
 2 10 -4 1.38 0.77
 2 -10 4 1.3 0.41
 -2 -10 -4 1.61 0.69
 2 -10 4 0.33 0.79
 2 -10 4 0.95 0.85
 -2 10 4 -0.29 0.75
 2 11 4 3.7 0.84
 -2 11 -4 2.41 0.82
 -2 -11 4 2.52 0.63
 -2 -11 4 1.62 0.96
 2 -11 -4 2.43 0.82
 -2 -11 4 2.8 0.89
 -2 11 -4 2.71 0.81
 -2 11 -4 1.99 0.84
 2 -11 -4 2.81 0.87
 -2 11 4 1.31 0.73
 2 -11 4 2.66 0.46
 2 -11 4 1.03 0.89
 -2 -11 -4 3.11 0.86
 2 11 -4 1.33 0.82
 2 -11 4 2.07 0.86
 -2 -11 -4 1.63 0.95
 -2 11 4 2.65 0.89
 -2 -11 -4 2.34 0.79
 -2 11 4 2.66 0.9
 2 11 -4 2.94 0.92
 2 -12 -4 8.9 0.98
 -2 12 -4 10.1 1.1
 -2 -12 4 8.81 0.78
 2 12 4 11.53 1.16
 2 12 4 10.68 2.03
 -2 -12 4 11.66 1.15
 2 12 4 8.22 1.05
 2 -12 -4 9.16 1.08
 -2 12 -4 8.47 0.97
 2 12 -4 10.08 0.98
 2 -12 4 11.53 1.07
 2 -12 4 9.01 0.6
 2 12 -4 11.33 1.09
 -2 -12 -4 9.82 1.15
 2 -12 4 9.2 1.11
 2 12 -4 11.61 1.15
 -2 12 4 9.66 0.99
 -2 12 4 9.35 1.27
 -2 13 -4 4.35 1.01
 2 13 4 2.42 0.94
 -2 13 -4 2.46 0.86
 -2 -13 4 3.32 0.72
 2 13 4 1.24 1.26
 -2 -13 4 4.42 1.08
 -2 13 -4 2.92 1.03
 -2 -13 4 2.43 1.09
 2 -13 -4 2.75 1.05
 -2 -13 -4 3.88 0.99
 2 13 -4 3.55 0.96
 2 -13 4 2.84 0.54
 2 -13 4 2.94 0.92
 -2 13 4 1.44 1
 2 13 -4 2.65 0.97
 2 -13 4 2.66 1.06
 2 13 -4 4.39 1.07
 -2 13 4 2.29 1.14
 -2 -13 -4 3.81 0.99
 -2 14 -4 -0.4 1.01
 2 14 4 0.66 1.02
 -2 14 -4 0.56 0.95
 2 14 4 0.57 1.11
 -2 -14 4 1.77 1.11
 -2 14 -4 0.15 1.05
 2 14 4 -0.22 1.08
 -2 -14 4 -1.54 0.95
 -2 -14 4 0.01 0.72
 -2 -14 -4 1.82 1.06
 -2 14 4 -1.13 1.12
 2 -14 4 1.2 1.11
 -2 -14 -4 -0.73 0.98
 2 14 -4 -1.57 0.93
 -2 14 4 1.59 1.16
 2 -14 4 -0.42 0.52
 2 -14 4 0.6 1.11
 -2 -14 -4 0.77 1.07
 -2 15 -4 2.55 1.11
 -2 15 -4 0.94 1.04
 -2 -15 4 0.73 1.17
 -2 -15 4 0.37 0.75
 2 -15 -4 0.91 1.07
 2 15 4 1.3 1.19
 2 15 4 -1.07 1.16
 2 -15 -4 2.33 1.16
 -2 -15 4 1.22 1.05
 2 15 4 1.78 1.05
 -2 15 -4 0.11 1.12
 -2 -15 -4 1.75 1.19
 2 15 -4 1.99 1.12
 2 -15 4 0.54 0.58
 -2 -15 -4 0.92 1.18
 2 15 -4 0.35 1
 2 15 -4 -0.55 1.12
 -2 15 4 1.64 1.15
 -2 15 4 1.45 1.1
 2 -15 4 1.63 1.25
 2 -15 4 0.28 1.13
 -2 15 4 2.26 1.14
 2 -16 -4 5.5 1.41
 2 -16 -4 5.74 0.84
 -2 16 -4 8.63 1.39
 -2 -16 4 7.46 1.41
 -2 16 -4 4.77 1.16
 2 16 4 5.84 1.36
 2 -16 -4 7.75 1.38
 -2 -16 4 6.69 0.92
 -2 16 -4 7.29 1.43
 2 16 4 4.4 1.29
 2 16 4 7.77 1.35
 -2 -16 4 8.65 1.37
 2 16 -4 5.61 1.39
 -2 16 4 8.27 1.31
 -2 16 4 8.21 1.45
 -2 -16 -4 8.85 1.45
 2 -16 4 6.22 0.7
 2 -16 4 6.79 1.4
 2 -16 4 8.37 1.37
 2 16 -4 9.56 1.26
 -2 -16 -4 7.03 0.96
 2 16 -4 7.9 1.45
 -2 -16 -4 6.16 1.29
 2 -17 -4 0.76 0.82
 2 -17 -4 1.51 1.5
 2 -17 -4 0.61 1.34
 2 17 4 0.14 1.43
 -2 17 -4 2.5 1.49
 -2 -17 4 0.87 1.36
 -2 17 -4 1 1.45
 2 17 4 3.09 1.45
 2 17 -4 2.54 1.45
 2 17 -4 0.46 1.29
 -2 -17 -4 -1.8 1.41
 -2 -17 -4 -2.15 1.46
 2 -17 4 1.78 1.46
 -2 17 4 2.43 1.33
 2 -17 4 0.39 0.67
 2 17 -4 1.46 1.36
 2 -17 4 1.59 1.32
 3 0 4 145.48 3.56
 3 0 -4 147.67 3.6
 3 0 4 146.99 3.56
 3 0 -4 145.08 3.59
 -3 0 -4 142.27 3.56
 -3 0 -4 145.62 3.56
 -3 0 4 143.97 3.6
 -3 0 4 142.41 3.59
 3 1 4 2.77 0.37
 3 -1 -4 2.99 0.38
 3 1 4 3.51 0.41
 3 -1 -4 3.18 0.34
 -3 -1 4 2.76 0.43
 -3 -1 4 3.33 0.45
 -3 -1 4 3.12 0.42
 3 1 4 2.8 0.37
 3 -1 -4 3.2 0.4
 -3 1 -4 3.45 0.36
 -3 1 -4 3.71 0.35
 3 1 -4 3.58 0.43
 3 -1 4 3.55 0.34
 -3 -1 -4 2.35 0.39
 -3 1 4 2.76 0.38
 3 -1 4 2.97 0.35
 -3 -1 -4 3.36 0.4
 -3 -1 -4 3.72 0.42
 3 1 -4 3.08 0.31
 -3 1 4 2.99 0.43
 3 1 -4 3.1 0.42
 -3 1 4 3.75 0.44
 3 1 -4 3.38 0.37
 3 2 4 109.49 2.81
 3 2 4 111.64 2.81
 -3 2 -4 109.69 2.79
 -3 -2 4 113.73 2.84
 3 -2 -4 115.77 2.82
 3 -2 -4 106.21 2.73
 3 -2 -4 113.15 2.82
 -3 2 -4 111.09 2.79
 -3 -2 4 109.73 2.86
 -3 -2 4 114.77 2.85
 3 2 4 109.77 2.83
 3 2 -4 113.11 2.84
 3 2 -4 110.99 2.85
 -3 -2 -4 113.77 2.84
 3 -2 4 108.51 2.79
 -3 -2 -4 107.47 2.81
 -3 -2 -4 110.19 2.81
 3 2 -4 111.36 2.83
 -3 2 4 115.84 2.82
 3 2 -4 107.9 2.79
 3 -2 4 109.27 2.79
 -3 2 4 111.84 2.82
 3 3 4 43.31 1.31
 -3 -3 4 43.27 1.35
 -3 3 -4 42.46 1.27
 -3 -3 4 45.84 1.36
 3 -3 -4 43.4 1.18
 3 -3 -4 42.54 1.3
 3 3 4 43.3 1.31
 3 -3 -4 42.93 1.31
 3 -3 -4 42.02 1.24
 3 3 4 43.06 1.32
 -3 -3 4 41.04 1.34
 -3 3 -4 40.94 1.27
 -3 3 4 41.25 1.31
 3 -3 4 40.83 1.27
 -3 3 4 43.65 1.31
 3 3 -4 45.09 1.29
 3 -3 4 43.69 1.27
 3 3 -4 44.69 1.34
 -3 -3 -4 42.41 1.32
 -3 -3 -4 42.28 1.3
 -3 -3 -4 45.02 1.31
 3 3 -4 40.8 1.34
 -3 3 4 42.92 1.18
 3 3 -4 41.09 1.32
 -3 -4 4 1.47 0.49
 3 -4 -4 1.75 0.49
 3 4 4 1.74 0.51
 3 -4 -4 1.52 0.44
 3 4 4 1.76 0.49
 -3 4 -4 2.02 0.44
 3 -4 -4 1.87 0.35
 3 4 4 1.71 0.44
 -3 -4 4 1.05 0.48
 -3 4 -4 1.66 0.47
 3 -4 4 1.86 0.49
 -3 4 4 1.92 0.5
 -3 -4 -4 1.89 0.45
 -3 -4 -4 1.52 0.49
 3 4 -4 1.55 0.44
 3 4 -4 1.97 0.5
 -3 4 4 1.2 0.37
 3 4 -4 1.64 0.45
 3 -4 4 1.39 0.48
 -3 4 4 2.17 0.46
 -3 -4 -4 1.43 0.45
 3 4 -4 1.36 0.41
 3 5 4 6.47 0.61
 -3 -5 4 5.94 0.64
 -3 -5 4 5.77 0.67
 -3 -5 4 5.19 0.5
 3 5 4 7.59 0.63
 3 -5 -4 6.72 0.61
 3 -5 -4 6.3 0.49
 -3 5 -4 6.74 0.58
 3 5 4 6.26 0.55
 -3 5 -4 5.74 0.59
 3 -5 -4 6.54 0.6
 -3 5 4 6.12 0.58
 -3 -5 -4 5.8 0.59
 -3 5 4 6.44 0.49
 3 5 -4 6.03 0.62
 3 -5 4 5.98 0.62
 -3 -5 -4 5.84 0.57
 3 -5 4 6.47 0.64
 -3 -5 -4 6.46 0.57
 3 5 -4 6.67 0.59
 3 5 -4 6.17 0.61
 -3 5 4 6.77 0.62
 3 -6 -4 0.01 0.46
 3 6 4 -0.22 0.54
 -3 -6 4 -0.21 0.55
 3 6 4 0.3 0.53
 -3 6 -4 -0.14 0.56
 -3 -6 4 0.43 0.45
 3 -6 -4 -0.05 0.53
 -3 6 -4 -0.66 0.58
 3 -6 -4 -0.68 0.51
 -3 -6 4 0.09 0.58
 3 6 -4 -0.07 0.63
 3 -6 4 0.3 0.54
 -3 6 4 0.38 0.58
 3 6 -4 1.09 0.55
 -3 -6 -4 0.1 0.51
 3 -6 4 -0.13 0.59
 -3 -6 -4 -0.74 0.62
 -3 -6 -4 0.17 0.56
 -3 6 4 -0.25 0.55
 3 6 -4 0.42 0.59
 -3 -7 4 1.85 0.7
 -3 7 -4 3.01 0.61
 3 -7 -4 2.74 0.68
 3 7 4 4.09 0.7
 -3 -7 4 2.22 0.48
 3 -7 -4 2.57 0.66
 -3 7 -4 3.07 0.64
 -3 -7 4 2.06 0.69
 3 7 4 2.66 0.59
 3 7 4 1.37 0.64
 3 -7 -4 3.87 0.55
 -3 7 4 4 0.69
 3 7 -4 2.79 0.57
 -3 -7 -4 2.79 0.64
 -3 -7 -4 3.55 0.57
 -3 -7 -4 3.6 0.72
 3 7 -4 1.97 0.59
 3 -7 4 3.24 0.64
 -3 7 4 2.44 0.65
 -3 7 4 3.82 0.53
 3 -7 4 2.23 0.6
 3 8 4 7.95 0.74
 3 8 4 7.98 0.77
 -3 8 -4 8.8 0.75
 -3 8 -4 8.05 0.75
 -3 -8 4 7.04 0.74
 3 -8 -4 8.54 0.66
 -3 8 -4 8.51 0.72
 -3 -8 4 9.19 0.81
 3 -8 -4 8.66 0.8
 -3 8 4 8.66 0.85
 3 8 -4 9.26 0.83
 3 8 -4 8.99 0.74
 -3 8 4 8.78 0.68
 3 -8 4 8.13 0.72
 -3 8 4 7.85 0.75
 -3 -8 -4 9.78 0.86
 3 8 -4 8.4 0.76
 3 -8 4 9.04 0.83
 -3 -8 -4 8.5 0.74
 -3 -9 4 3.49 0.75
 3 -9 -4 4.14 0.77
 -3 -9 4 2.61 0.56
 3 9 4 1.55 0.73
 -3 9 -4 2.62 0.63
 -3 9 -4 2.77 0.72
 3 9 4 2.35 0.67
 -3 9 -4 3.77 0.69
 3 -9 -4 3.24 0.79
 -3 -9 4 2.84 0.72
 3 9 4 1.96 0.74
 -3 -9 -4 2.75 0.82
 3 9 -4 3.69 0.75
 3 9 -4 3.69 0.76
 3 -9 4 2.12 0.72
 -3 -9 -4 2.99 0.67
 -3 -9 -4 2.58 0.64
 -3 9 4 2.37 0.62
 3 -9 4 3.86 0.73
 -3 9 4 1.92 0.75
 3 9 -4 1.69 0.68
 -3 9 4 3.78 0.8
 -3 -10 4 0.02 0.55
 -3 -10 4 1.03 0.68
 -3 10 -4 -0.14 0.66
 -3 -10 4 0.71 0.78
 3 10 4 0.23 0.69
 -3 10 -4 -1.26 0.68
 3 -10 -4 1 0.76
 3 10 4 0.09 0.79
 -3 10 -4 -0.64 0.72
 3 10 4 -1.28 0.78
 3 -10 -4 0 0.78
 3 10 -4 0.34 0.7
 3 -10 4 -0.1 0.82
 -3 10 4 0.01 0.71
 -3 10 4 0.38 0.64
 -3 10 4 1.14 0.78
 3 -10 4 0.32 0.79
 -3 -10 -4 0.54 0.71
 -3 -10 -4 -0.12 0.69
 3 -10 4 0.05 0.34
 3 10 -4 -0.67 0.75
 3 10 -4 1.27 0.78
 -3 -10 -4 0.29 0.69
 3 -11 -4 30.69 1.68
 -3 11 -4 34.69 1.71
 -3 11 -4 31.77 1.64
 3 11 4 33.12 1.65
 3 -11 -4 32.91 1.65
 -3 11 -4 31.73 1.64
 3 11 4 29.55 1.74
 -3 -11 4 31.32 1.72
 3 11 4 32.46 1.75
 -3 -11 -4 30.77 1.71
 -3 11 4 31.4 1.7
 3 11 -4 32.65 1.72
 3 11 -4 29.18 1.61
 3 11 -4 31.65 1.71
 -3 11 4 29.69 1.7
 -3 -11 -4 32.15 1.64
 -3 11 4 31.47 1.56
 -3 -11 -4 32.66 1.64
 3 -11 4 33.18 1.69
 3 -11 4 30.6 1.7
 -3 12 -4 3.53 0.91
 -3 -12 4 3.81 0.69
 3 -12 -4 3.5 0.97
 -3 -12 4 2.69 0.84
 -3 12 -4 1.8 0.97
 3 12 4 4.86 1
 -3 12 -4 2.68 0.86
 3 12 4 2.16 0.86
 3 -12 -4 2.58 0.98
 -3 -12 4 4.15 1.1
 3 12 4 2.19 1
 3 12 -4 2.56 1.01
 3 -12 4 4.64 0.98
 -3 -12 -4 2.73 1.2
 3 12 -4 5.42 1.08
 3 12 -4 5.21 0.95
 -3 12 4 2.28 0.82
 3 -12 4 3.58 1.07
 -3 -12 -4 4.41 0.91
 -3 12 4 3.03 1.1
 3 -12 4 3.56 0.44
 -3 12 4 3.49 0.94
[truncated: 1,690,830 more chars]
