# Supplementary material
Source: MDPI journal article supplement (https://www.mdpi.com/2304-6740/6/1/5)
Supplement: s1 [file s1 › CIF&CHECKCIF/Ligand-2.cif]

data_va_jc_h2la1_0m
_audit_creation_date              2016-10-26
_audit_creation_method
;
Olex2 1.2
(compiled 2016.09.09 svn.r3337 for OlexSys, GUI svn.r5227)
;
_shelxl_version_number            2014-3
_publ_contact_author_address      ?
_publ_contact_author_email        ?
_publ_contact_author_id_orcid     ?
_publ_contact_author_name         ''
_publ_contact_author_phone        ?
_publ_section_references
;
Dolomanov, O.V., Bourhis, L.J., Gildea, R.J, Howard, J.A.K. & Puschmann, H.
 (2009), J. Appl. Cryst. 42, 339-341.

Sheldrick, G.M. (2008). Acta Cryst. A64, 112-122.

Sheldrick, G.M. (2015). Acta Cryst. C71, 3-8.
;
_chemical_name_common             ?
_chemical_name_systematic
;
 ?
;
_chemical_formula_moiety          'C23 H18 F N3 O4'
_chemical_formula_sum             'C23 H18 F N3 O4'
_chemical_formula_weight          419.40
_chemical_melting_point           ?
loop_
  _atom_type_symbol
  _atom_type_description
  _atom_type_scat_dispersion_real
  _atom_type_scat_dispersion_imag
  _atom_type_scat_source
 'C' 'C' 0.0033 0.0016 'International Tables Vol C Tables 4.2.6.8 and 6.1.1.4'
 'H' 'H' 0.0000 0.0000 'International Tables Vol C Tables 4.2.6.8 and 6.1.1.4'
 'F' 'F' 0.0171 0.0103 'International Tables Vol C Tables 4.2.6.8 and 6.1.1.4'
 'N' 'N' 0.0061 0.0033 'International Tables Vol C Tables 4.2.6.8 and 6.1.1.4'
 'O' 'O' 0.0106 0.0060 'International Tables Vol C Tables 4.2.6.8 and 6.1.1.4'

_shelx_space_group_comment
;
The symmetry employed for this shelxl refinement is uniquely defined
by the following loop, which should always be used as a source of
symmetry information in preference to the above space-group names.
They are only intended as comments.
;
_space_group_crystal_system       'triclinic'
_space_group_IT_number            2
_space_group_name_H-M_alt         'P -1'
_space_group_name_Hall            '-P 1'
loop_
  _space_group_symop_operation_xyz
 'x, y, z'
 '-x, -y, -z'

_cell_length_a                    6.50650(10)
_cell_length_b                    8.9928(2)
_cell_length_c                    17.7353(5)
_cell_angle_alpha                 98.3710(11)
_cell_angle_beta                  92.8731(11)
_cell_angle_gamma                 100.6470(10)
_cell_volume                      1005.82(4)
_cell_formula_units_Z             2
_cell_measurement_reflns_used     9145
_cell_measurement_temperature     296
_cell_measurement_theta_max       26.36
_cell_measurement_theta_min       2.33
_shelx_estimated_absorpt_T_max    ?
_shelx_estimated_absorpt_T_min    ?
_exptl_absorpt_coefficient_mu     0.103
_exptl_absorpt_correction_T_max   ?
_exptl_absorpt_correction_T_min   ?
_exptl_absorpt_correction_type    'none'
_exptl_absorpt_process_details    ?
_exptl_crystal_colour             'clear light yellow'
_exptl_crystal_colour_lustre      clear
_exptl_crystal_colour_modifier    light
_exptl_crystal_colour_primary     yellow
_exptl_crystal_density_diffrn     1.385
_exptl_crystal_density_meas       ?
_exptl_crystal_density_method     ?
_exptl_crystal_description        block
_exptl_crystal_F_000              436
_exptl_crystal_size_max           0.347
_exptl_crystal_size_mid           0.284
_exptl_crystal_size_min           0.176
_exptl_special_details
;
 ?
;
_exptl_transmission_factor_max    ?
_exptl_transmission_factor_min    ?
_diffrn_reflns_av_R_equivalents   0.0319
_diffrn_reflns_av_unetI/netI      0.0149
_diffrn_reflns_Laue_measured_fraction_full 0.999
_diffrn_reflns_Laue_measured_fraction_max 0.999
_diffrn_reflns_limit_h_max        8
_diffrn_reflns_limit_h_min        -8
_diffrn_reflns_limit_k_max        11
_diffrn_reflns_limit_k_min        -11
_diffrn_reflns_limit_l_max        22
_diffrn_reflns_limit_l_min        -22
_diffrn_reflns_number             25053
_diffrn_reflns_point_group_measured_fraction_full 0.999
_diffrn_reflns_point_group_measured_fraction_max 0.999
_diffrn_reflns_theta_full         26.000
_diffrn_reflns_theta_max          26.387
_diffrn_reflns_theta_min          2.329
_diffrn_ambient_temperature       296
_diffrn_detector_area_resol_mean  ?
_diffrn_measured_fraction_theta_full 0.999
_diffrn_measured_fraction_theta_max 0.999
_diffrn_measurement_device_type   'Bruker APEX-II CCD'
_diffrn_measurement_method        '\f and \w scans'
_diffrn_radiation_type            MoK\a
_diffrn_radiation_wavelength      0.71073
_diffrn_source                    ?
_diffrn_standards_number          0
_reflns_Friedel_coverage          0.000
_reflns_Friedel_fraction_full     .
_reflns_Friedel_fraction_max      .
_reflns_number_gt                 3106
_reflns_number_total              4116
_reflns_special_details
;
 Reflections were merged by SHELXL according to the crystal
 class for the calculation of statistics and refinement.
 
 _reflns_Friedel_fraction is defined as the number of unique
 Friedel pairs measured divided by the number that would be
 possible theoretically, ignoring centric projections and
 systematic absences.
;
_reflns_threshold_expression      'I > 2\s(I)'
_computing_cell_refinement        'SAINT v8.34A (Bruker, 2013)'
_computing_data_collection        ?
_computing_data_reduction         'SAINT v8.34A (Bruker, 2013)'
_computing_molecular_graphics     'Olex2 (Dolomanov et al., 2009)'
_computing_publication_material   'Olex2 (Dolomanov et al., 2009)'
_computing_structure_refinement   'ShelXL (Sheldrick, 2015)'
_computing_structure_solution     'XS (Sheldrick, 2008)'
_refine_diff_density_max          0.382
_refine_diff_density_min          -0.320
_refine_diff_density_rms          0.041
_refine_ls_extinction_coef        .
_refine_ls_extinction_method      none
_refine_ls_goodness_of_fit_ref    1.047
_refine_ls_hydrogen_treatment     constr
_refine_ls_matrix_type            full
_refine_ls_number_parameters      270
_refine_ls_number_reflns          4116
_refine_ls_number_restraints      0
_refine_ls_R_factor_all           0.0735
_refine_ls_R_factor_gt            0.0558
_refine_ls_restrained_S_all       1.047
_refine_ls_shift/su_max           0.003
_refine_ls_shift/su_mean          0.000
_refine_ls_structure_factor_coef  Fsqd
_refine_ls_weighting_details
'w=1/[\s^2^(Fo^2^)+(0.0830P)^2^+0.4060P] where P=(Fo^2^+2Fc^2^)/3'
_refine_ls_weighting_scheme       calc
_refine_ls_wR_factor_gt           0.1550
_refine_ls_wR_factor_ref          0.1751
_refine_special_details
;
 ?
;
_olex2_refinement_description
;
1. Fixed Uiso
 At 1.2 times of:
  All C(H) groups, All N(H) groups
 At 1.5 times of:
  All C(H,H,H) groups, All O(H) groups
2.a Aromatic/amide H refined with riding coordinates:
 N1(H1), C3(H3), C5(H5), C6(H6), C2(H2A), C8(H8), C12(H12), C13(H13), C14(H14),
  C15(H15), C17(H17), C20(H20), C21(H21), C23(H23)
2.b Fitted hexagon refined as free rotating group:
 C3(C4,C5,C6,C1,C2)
2.c Idealised Me refined as rotating group:
 C10(H10A,H10B,H10C)
2.d Idealised tetrahedral OH refined as rotating group:
 O2(H2)
;
_atom_sites_solution_hydrogens    geom
_atom_sites_solution_primary      direct
_atom_sites_solution_secondary    ?
loop_
  _atom_site_label
  _atom_site_type_symbol
  _atom_site_fract_x
  _atom_site_fract_y
  _atom_site_fract_z
  _atom_site_U_iso_or_equiv
  _atom_site_adp_type
  _atom_site_occupancy
  _atom_site_site_symmetry_order
  _atom_site_calc_flag
  _atom_site_refinement_flags_posn
  _atom_site_refinement_flags_adp
  _atom_site_refinement_flags_occupancy
  _atom_site_disorder_assembly
  _atom_site_disorder_group
 F1 F 0.8532(3) -0.3993(2) 0.57203(11) 0.1060(6) Uani 1 1 d . . . . .
 O1 O 0.3981(2) -0.2253(2) 0.28815(9) 0.0664(4) Uani 1 1 d . . . . .
 O2 O 0.5900(2) 0.2332(2) 0.27089(9) 0.0641(4) Uani 1 1 d . . . . .
 H2 H 0.4723 0.1903 0.2523 0.096 Uiso 1 1 calc GR . . . .
 O3 O 0.8734(3) 0.6284(2) 0.02081(11) 0.0801(5) Uani 1 1 d . . . . .
 O4 O 1.1538(3) 0.6825(2) 0.09634(12) 0.0945(7) Uani 1 1 d . . . . .
 N1 N 0.1080(3) -0.0709(2) 0.25377(10) 0.0558(5) Uani 1 1 d . . . . .
 H1 H 0.2190 -0.1036 0.2404 0.067 Uiso 1 1 calc R . . . .
 N2 N 0.2679(2) 0.15768(18) 0.17202(9) 0.0456(4) Uani 1 1 d . . . . .
 N3 N 0.9734(3) 0.6162(2) 0.07887(12) 0.0648(5) Uani 1 1 d . . . . .
 C3 C 0.4530(2) -0.22272(19) 0.49312(8) 0.0670(6) Uani 1 1 d . . . . .
 H3 H 0.3508 -0.1683 0.5096 0.080 Uiso 1 1 calc R . . . .
 C4 C 0.4788(2) -0.25530(17) 0.41553(7) 0.0520(5) Uani 1 1 d G . . . .
 C5 C 0.6316(3) -0.3366(2) 0.39090(7) 0.0735(7) Uani 1 1 d G . . . .
 H5 H 0.6489 -0.3584 0.3390 0.088 Uiso 1 1 calc R . . . .
 C6 C 0.7585(3) -0.3853(2) 0.44387(10) 0.0824(8) Uani 1 1 d G . . . .
 H6 H 0.8607 -0.4397 0.4274 0.099 Uiso 1 1 calc R . . . .
 C1 C 0.7326(3) -0.3528(2) 0.52146(9) 0.0739(7) Uani 1 1 d G . . . .
 C2 C 0.5799(3) -0.2715(2) 0.54609(6) 0.0792(8) Uani 1 1 d G . . . .
 H2A H 0.5626 -0.2497 0.5980 0.095 Uiso 1 1 calc R . . . .
 C7 C 0.3534(3) -0.1999(2) 0.35593(12) 0.0502(5) Uani 1 1 d . . . . .
 C8 C 0.1913(3) -0.1198(3) 0.37756(12) 0.0573(5) Uani 1 1 d . . . . .
 H8 H 0.1628 -0.1076 0.4287 0.069 Uiso 1 1 calc R . . . .
 C9 C 0.0740(3) -0.0594(2) 0.32769(12) 0.0534(5) Uani 1 1 d . . . . .
 C10 C -0.0934(4) 0.0242(3) 0.35614(16) 0.0753(7) Uani 1 1 d . . . . .
 H10A H -0.0744 0.1218 0.3389 0.113 Uiso 1 1 calc GR . . . .
 H10B H -0.0840 0.0393 0.4110 0.113 Uiso 1 1 calc GR . . . .
 H10C H -0.2288 -0.0350 0.3367 0.113 Uiso 1 1 calc GR . . . .
 C11 C -0.0221(3) -0.0343(2) 0.19464(12) 0.0493(5) Uani 1 1 d . . . . .
 C12 C -0.2275(3) -0.1122(3) 0.17812(15) 0.0625(6) Uani 1 1 d . . . . .
 H12 H -0.2843 -0.1836 0.2082 0.075 Uiso 1 1 calc R . . . .
 C13 C -0.3483(3) -0.0850(3) 0.11759(15) 0.0672(6) Uani 1 1 d . . . . .
 H13 H -0.4866 -0.1370 0.1071 0.081 Uiso 1 1 calc R . . . .
 C14 C -0.2637(3) 0.0190(3) 0.07281(14) 0.0668(6) Uani 1 1 d . . . . .
 H14 H -0.3444 0.0356 0.0312 0.080 Uiso 1 1 calc R . . . .
 C15 C -0.0615(3) 0.0991(3) 0.08861(12) 0.0563(5) Uani 1 1 d . . . . .
 H15 H -0.0067 0.1700 0.0580 0.068 Uiso 1 1 calc R . . . .
 C16 C 0.0616(3) 0.0748(2) 0.15008(11) 0.0443(4) Uani 1 1 d . . . . .
 C17 C 0.3638(3) 0.2515(2) 0.13172(12) 0.0507(5) Uani 1 1 d . . . . .
 H17 H 0.2974 0.2637 0.0860 0.061 Uiso 1 1 calc R . . . .
 C18 C 0.5721(3) 0.3389(2) 0.15533(11) 0.0454(4) Uani 1 1 d . . . . .
 C19 C 0.6791(3) 0.3254(2) 0.22460(11) 0.0481(4) Uani 1 1 d . . . . .
 C20 C 0.8819(3) 0.4089(3) 0.24460(12) 0.0574(5) Uani 1 1 d . . . . .
 H20 H 0.9520 0.4006 0.2903 0.069 Uiso 1 1 calc R . . . .
 C21 C 0.6722(3) 0.4358(2) 0.10841(12) 0.0527(5) Uani 1 1 d . . . . .
 H21 H 0.6035 0.4465 0.0628 0.063 Uiso 1 1 calc R . . . .
 C22 C 0.8722(3) 0.5156(2) 0.12942(12) 0.0521(5) Uani 1 1 d . . . . .
 C23 C 0.9793(3) 0.5037(3) 0.19728(13) 0.0578(5) Uani 1 1 d . . . . .
 H23 H 1.1149 0.5590 0.2106 0.069 Uiso 1 1 calc R . . . .

loop_
  _atom_site_aniso_label
  _atom_site_aniso_U_11
  _atom_site_aniso_U_22
  _atom_site_aniso_U_33
  _atom_site_aniso_U_23
  _atom_site_aniso_U_13
  _atom_site_aniso_U_12
 F1 0.1168(14) 0.1072(13) 0.1008(13) 0.0329(10) -0.0360(11) 0.0379(11)
 O1 0.0560(9) 0.0966(12) 0.0550(9) 0.0235(8) 0.0110(7) 0.0257(8)
 O2 0.0592(9) 0.0809(11) 0.0511(8) 0.0288(8) -0.0042(7) -0.0010(8)
 O3 0.0859(12) 0.0791(12) 0.0802(12) 0.0411(10) 0.0149(10) 0.0037(9)
 O4 0.0719(12) 0.0962(14) 0.0979(14) 0.0168(11) 0.0158(10) -0.0325(10)
 N1 0.0429(9) 0.0695(11) 0.0630(11) 0.0317(9) 0.0110(8) 0.0128(8)
 N2 0.0375(8) 0.0523(9) 0.0481(9) 0.0165(7) 0.0016(6) 0.0055(7)
 N3 0.0646(12) 0.0573(11) 0.0690(13) 0.0149(9) 0.0156(10) -0.0039(9)
 C3 0.0760(15) 0.0751(15) 0.0537(13) 0.0112(11) -0.0001(11) 0.0251(12)
 C4 0.0518(11) 0.0506(11) 0.0541(11) 0.0146(9) 0.0006(9) 0.0077(9)
 C5 0.0819(17) 0.0852(17) 0.0654(15) 0.0226(13) 0.0097(12) 0.0372(14)
 C6 0.0816(18) 0.0885(19) 0.091(2) 0.0295(15) 0.0050(15) 0.0412(15)
 C1 0.0764(16) 0.0658(14) 0.0794(17) 0.0212(12) -0.0204(13) 0.0127(12)
 C2 0.100(2) 0.0835(18) 0.0553(14) 0.0120(12) -0.0113(13) 0.0237(15)
 C7 0.0445(10) 0.0535(11) 0.0523(11) 0.0156(9) 0.0049(8) 0.0023(8)
 C8 0.0593(12) 0.0664(13) 0.0504(11) 0.0158(10) 0.0065(9) 0.0171(10)
 C9 0.0489(11) 0.0511(11) 0.0601(12) 0.0121(9) 0.0033(9) 0.0072(8)
 C10 0.0743(16) 0.0822(17) 0.0751(16) 0.0083(13) 0.0028(13) 0.0337(13)
 C11 0.0392(10) 0.0557(11) 0.0547(11) 0.0154(9) 0.0050(8) 0.0079(8)
 C12 0.0448(11) 0.0644(13) 0.0772(15) 0.0187(11) 0.0116(10) 0.0001(9)
 C13 0.0353(10) 0.0713(14) 0.0874(17) 0.0041(12) -0.0037(10) -0.0003(9)
 C14 0.0460(12) 0.0838(16) 0.0679(14) 0.0143(12) -0.0127(10) 0.0082(11)
 C15 0.0454(11) 0.0667(13) 0.0569(12) 0.0206(10) -0.0032(9) 0.0049(9)
 C16 0.0354(9) 0.0504(10) 0.0475(10) 0.0109(8) 0.0023(7) 0.0076(7)
 C17 0.0409(10) 0.0633(12) 0.0499(11) 0.0235(9) -0.0032(8) 0.0057(9)
 C18 0.0398(9) 0.0515(10) 0.0456(10) 0.0148(8) 0.0007(8) 0.0057(8)
 C19 0.0479(10) 0.0543(11) 0.0428(10) 0.0133(8) 0.0011(8) 0.0083(8)
 C20 0.0516(11) 0.0664(13) 0.0502(11) 0.0107(10) -0.0108(9) 0.0042(10)
 C21 0.0494(11) 0.0577(12) 0.0508(11) 0.0201(9) -0.0010(8) 0.0021(9)
 C22 0.0489(11) 0.0500(11) 0.0548(12) 0.0115(9) 0.0068(9) -0.0004(8)
 C23 0.0439(11) 0.0588(12) 0.0639(13) 0.0052(10) -0.0030(9) -0.0023(9)

_geom_special_details
;
 All esds (except the esd in the dihedral angle between two l.s. planes)
 are estimated using the full covariance matrix.  The cell esds are taken
 into account individually in the estimation of esds in distances, angles
 and torsion angles; correlations between esds in cell parameters are only
 used when they are defined by crystal symmetry.  An approximate (isotropic)
 treatment of cell esds is used for estimating esds involving l.s. planes.
;
loop_
  _geom_bond_atom_site_label_1
  _geom_bond_atom_site_label_2
  _geom_bond_distance
  _geom_bond_site_symmetry_2
  _geom_bond_publ_flag
 F1 C1 1.3250(17) . ?
 O1 C7 1.249(2) . ?
 O2 H2 0.8200 . ?
 O2 C19 1.329(2) . ?
 O3 N3 1.220(3) . ?
 O4 N3 1.217(3) . ?
 N1 H1 0.8600 . ?
 N1 C9 1.333(3) . ?
 N1 C11 1.428(2) . ?
 N2 C16 1.415(2) . ?
 N2 C17 1.279(2) . ?
 N3 C22 1.460(3) . ?
 C3 H3 0.9300 . ?
 C3 C4 1.3900 . ?
 C3 C2 1.3900 . ?
 C4 C5 1.3900 . ?
 C4 C7 1.499(2) . ?
 C5 H5 0.9300 . ?
 C5 C6 1.3900 . ?
 C6 H6 0.9300 . ?
 C6 C1 1.3900 . ?
 C1 C2 1.3900 . ?
 C2 H2A 0.9300 . ?
 C7 C8 1.421(3) . ?
 C8 H8 0.9300 . ?
 C8 C9 1.373(3) . ?
 C9 C10 1.501(3) . ?
 C10 H10A 0.9600 . ?
 C10 H10B 0.9600 . ?
 C10 H10C 0.9600 . ?
 C11 C12 1.385(3) . ?
 C11 C16 1.398(3) . ?
 C12 H12 0.9300 . ?
 C12 C13 1.376(3) . ?
 C13 H13 0.9300 . ?
 C13 C14 1.371(4) . ?
 C14 H14 0.9300 . ?
 C14 C15 1.372(3) . ?
 C15 H15 0.9300 . ?
 C15 C16 1.387(3) . ?
 C17 H17 0.9300 . ?
 C17 C18 1.444(3) . ?
 C18 C19 1.413(3) . ?
 C18 C21 1.390(3) . ?
 C19 C20 1.393(3) . ?
 C20 H20 0.9300 . ?
 C20 C23 1.376(3) . ?
 C21 H21 0.9300 . ?
 C21 C22 1.369(3) . ?
 C22 C23 1.388(3) . ?
 C23 H23 0.9300 . ?

loop_
  _geom_angle_atom_site_label_1
  _geom_angle_atom_site_label_2
  _geom_angle_atom_site_label_3
  _geom_angle
  _geom_angle_site_symmetry_1
  _geom_angle_site_symmetry_3
  _geom_angle_publ_flag
 C19 O2 H2 109.5 . . ?
 C9 N1 H1 116.8 . . ?
 C9 N1 C11 126.32(18) . . ?
 C11 N1 H1 116.8 . . ?
 C17 N2 C16 121.95(16) . . ?
 O3 N3 C22 118.33(18) . . ?
 O4 N3 O3 123.3(2) . . ?
 O4 N3 C22 118.4(2) . . ?
 C4 C3 H3 120.0 . . ?
 C4 C3 C2 120.0 . . ?
 C2 C3 H3 120.0 . . ?
 C3 C4 C5 120.0 . . ?
 C3 C4 C7 122.48(12) . . ?
 C5 C4 C7 117.46(12) . . ?
 C4 C5 H5 120.0 . . ?
 C4 C5 C6 120.0 . . ?
 C6 C5 H5 120.0 . . ?
 C5 C6 H6 120.0 . . ?
 C5 C6 C1 120.0 . . ?
 C1 C6 H6 120.0 . . ?
 F1 C1 C6 120.08(15) . . ?
 F1 C1 C2 119.92(15) . . ?
 C2 C1 C6 120.0 . . ?
 C3 C2 H2A 120.0 . . ?
 C1 C2 C3 120.0 . . ?
 C1 C2 H2A 120.0 . . ?
 O1 C7 C4 117.91(17) . . ?
 O1 C7 C8 122.18(19) . . ?
 C8 C7 C4 119.91(17) . . ?
 C7 C8 H8 117.9 . . ?
 C9 C8 C7 124.1(2) . . ?
 C9 C8 H8 117.9 . . ?
 N1 C9 C8 121.21(19) . . ?
 N1 C9 C10 118.58(19) . . ?
 C8 C9 C10 120.2(2) . . ?
 C9 C10 H10A 109.5 . . ?
 C9 C10 H10B 109.5 . . ?
 C9 C10 H10C 109.5 . . ?
 H10A C10 H10B 109.5 . . ?
 H10A C10 H10C 109.5 . . ?
 H10B C10 H10C 109.5 . . ?
 C12 C11 N1 120.49(18) . . ?
 C12 C11 C16 119.54(19) . . ?
 C16 C11 N1 119.87(16) . . ?
 C11 C12 H12 119.7 . . ?
 C13 C12 C11 120.6(2) . . ?
 C13 C12 H12 119.7 . . ?
 C12 C13 H13 120.2 . . ?
 C14 C13 C12 119.64(19) . . ?
 C14 C13 H13 120.2 . . ?
 C13 C14 H14 119.6 . . ?
 C13 C14 C15 120.9(2) . . ?
 C15 C14 H14 119.6 . . ?
 C14 C15 H15 119.9 . . ?
 C14 C15 C16 120.3(2) . . ?
 C16 C15 H15 119.9 . . ?
 C11 C16 N2 117.34(16) . . ?
 C15 C16 N2 123.59(17) . . ?
 C15 C16 C11 119.05(17) . . ?
 N2 C17 H17 119.1 . . ?
 N2 C17 C18 121.80(17) . . ?
 C18 C17 H17 119.1 . . ?
 C19 C18 C17 121.29(17) . . ?
 C21 C18 C17 119.62(17) . . ?
 C21 C18 C19 119.06(17) . . ?
 O2 C19 C18 121.10(17) . . ?
 O2 C19 C20 119.26(17) . . ?
 C20 C19 C18 119.64(18) . . ?
 C19 C20 H20 119.7 . . ?
 C23 C20 C19 120.58(19) . . ?
 C23 C20 H20 119.7 . . ?
 C18 C21 H21 120.1 . . ?
 C22 C21 C18 119.88(18) . . ?
 C22 C21 H21 120.1 . . ?
 C21 C22 N3 118.61(19) . . ?
 C21 C22 C23 121.76(19) . . ?
 C23 C22 N3 119.63(18) . . ?
 C20 C23 C22 119.07(18) . . ?
 C20 C23 H23 120.5 . . ?
 C22 C23 H23 120.5 . . ?

loop_
  _geom_hbond_atom_site_label_D
  _geom_hbond_atom_site_label_H
  _geom_hbond_atom_site_label_A
  _geom_hbond_distance_DH
  _geom_hbond_distance_HA
  _geom_hbond_distance_DA
  _geom_hbond_angle_DHA
  _geom_hbond_site_symmetry_A
 O2 H2 N2 0.82 1.85 2.586(2) 148.4 .
 N1 H1 O1 0.86 1.98 2.638(2) 132.6 .

loop_
  _geom_torsion_atom_site_label_1
  _geom_torsion_atom_site_label_2
  _geom_torsion_atom_site_label_3
  _geom_torsion_atom_site_label_4
  _geom_torsion
  _geom_torsion_site_symmetry_1
  _geom_torsion_site_symmetry_2
  _geom_torsion_site_symmetry_3
  _geom_torsion_site_symmetry_4
  _geom_torsion_publ_flag
 F1 C1 C2 C3 -179.89(19) . . . . ?
 O1 C7 C8 C9 -2.0(3) . . . . ?
 O2 C19 C20 C23 179.1(2) . . . . ?
 O3 N3 C22 C21 2.0(3) . . . . ?
 O3 N3 C22 C23 -177.6(2) . . . . ?
 O4 N3 C22 C21 -177.3(2) . . . . ?
 O4 N3 C22 C23 3.1(3) . . . . ?
 N1 C11 C12 C13 -175.2(2) . . . . ?
 N1 C11 C16 N2 -7.3(3) . . . . ?
 N1 C11 C16 C15 174.30(19) . . . . ?
 N2 C17 C18 C19 -0.5(3) . . . . ?
 N2 C17 C18 C21 178.01(19) . . . . ?
 N3 C22 C23 C20 179.7(2) . . . . ?
 C3 C4 C5 C6 0.0 . . . . ?
 C3 C4 C7 O1 174.87(16) . . . . ?
 C3 C4 C7 C8 -4.4(2) . . . . ?
 C4 C3 C2 C1 0.0 . . . . ?
 C4 C5 C6 C1 0.0 . . . . ?
 C4 C7 C8 C9 177.24(19) . . . . ?
 C5 C4 C7 O1 -2.4(2) . . . . ?
 C5 C4 C7 C8 178.27(16) . . . . ?
 C5 C6 C1 F1 179.89(19) . . . . ?
 C5 C6 C1 C2 0.0 . . . . ?
 C6 C1 C2 C3 0.0 . . . . ?
 C2 C3 C4 C5 0.0 . . . . ?
 C2 C3 C4 C7 -177.23(15) . . . . ?
 C7 C4 C5 C6 177.37(15) . . . . ?
 C7 C8 C9 N1 -0.9(3) . . . . ?
 C7 C8 C9 C10 -179.6(2) . . . . ?
 C9 N1 C11 C12 -61.4(3) . . . . ?
 C9 N1 C11 C16 122.3(2) . . . . ?
 C11 N1 C9 C8 169.8(2) . . . . ?
 C11 N1 C9 C10 -11.4(3) . . . . ?
 C11 C12 C13 C14 0.7(4) . . . . ?
 C12 C11 C16 N2 176.39(18) . . . . ?
 C12 C11 C16 C15 -2.0(3) . . . . ?
 C12 C13 C14 C15 -1.5(4) . . . . ?
 C13 C14 C15 C16 0.6(4) . . . . ?
 C14 C15 C16 N2 -177.1(2) . . . . ?
 C14 C15 C16 C11 1.2(3) . . . . ?
 C16 N2 C17 C18 178.28(18) . . . . ?
 C16 C11 C12 C13 1.1(3) . . . . ?
 C17 N2 C16 C11 174.67(19) . . . . ?
 C17 N2 C16 C15 -7.0(3) . . . . ?
 C17 C18 C19 O2 -1.0(3) . . . . ?
 C17 C18 C19 C20 178.50(19) . . . . ?
 C17 C18 C21 C22 -178.1(2) . . . . ?
 C18 C19 C20 C23 -0.4(3) . . . . ?
 C18 C21 C22 N3 179.86(19) . . . . ?
 C18 C21 C22 C23 -0.5(3) . . . . ?
 C19 C18 C21 C22 0.4(3) . . . . ?
 C19 C20 C23 C22 0.3(3) . . . . ?
 C21 C18 C19 O2 -179.46(19) . . . . ?
 C21 C18 C19 C20 0.0(3) . . . . ?
 C21 C22 C23 C20 0.1(3) . . . . ?

loop_
  _refln_index_h
  _refln_index_k
  _refln_index_l
  _refln_F_squared_meas
  _refln_F_squared_sigma
  _refln_scale_group_code
 0 0 -2 11262.6 53.2 1
 0 0 -2 4352.2 42.3 1
 0 0 2 10973.7 65.8 1
 0 0 -3 159585 525 1
 0 0 -3 163394 545 1
 0 0 3 164529 547 1
 0 0 3 163294 536 1
 0 0 -4 76805.3 316.1 1
 0 0 -4 77563.7 327.9 1
 0 0 4 77877.4 318.4 1
 0 0 4 76755.7 315.4 1
 0 0 -5 10838.6 82.5 1
 0 0 -5 10817 81.8 1
 0 0 5 11036.1 83.1 1
 0 0 5 10974.7 82.2 1
 0 0 5 10625.6 72.9 5
 0 0 -6 32303.8 145.2 1
 0 0 -6 32347.6 144.9 1
 0 0 6 31888.4 144.3 1
 0 0 6 31903.5 144 1
 0 0 6 30940.6 127.9 5
 0 0 -7 2129.7 58 1
 0 0 -7 2172 57.4 1
 0 0 7 2237.2 59.5 1
 0 0 7 2194 58.4 1
 0 0 7 2150.1 51.1 5
 0 0 -8 4075 75.6 1
 0 0 -8 4194.8 74.6 1
 0 0 8 4228.8 77.5 1
 0 0 8 4039.2 74.9 1
 0 0 8 4252.4 67.6 5
 0 0 -9 140.622 33.868 1
 0 0 -9 195.012 34.276 1
 0 0 9 152.06 33.71 1
 0 0 9 146.453 32.343 1
 0 0 9 164.483 27.774 5
 0 0 -10 67.096 35.317 1
 0 0 -10 56.301 35.661 1
 0 0 10 81.198 35.838 1
 0 0 10 23.856 33.513 1
 0 0 10 113.29 27.041 5
 0 0 -11 10172.9 125 1
 0 0 -11 10014.5 123.7 1
 0 0 11 10411.4 127.2 1
 0 0 11 10196 124.1 1
 0 0 11 9830.1 108.1 5
 0 0 -12 3882 97.1 1
 0 0 -12 3983.8 98.1 1
 0 0 12 3785.6 99.4 1
 0 0 12 3969.6 98 1
 0 0 12 4002.5 84.9 5
 0 0 -13 1259.1 84.6 1
 0 0 -13 1196.9 86 1
 0 0 13 1266.7 86.9 1
 0 0 13 1276.3 84.3 1
 0 0 13 1150.8 64.4 3
 0 0 13 1211.3 70.4 5
 0 0 -14 806.476 63.483 1
 0 0 -14 981.411 94.051 1
 0 0 14 858.388 88.871 1
 0 0 14 862.444 85.827 1
 0 0 14 906.645 64.658 3
 0 0 14 701.826 73.678 5
 0 0 -15 150.757 56.019 1
 0 0 15 91.782 87.519 1
 0 0 15 180.51 55.212 1
 0 0 15 122.344 47.453 3
 0 0 15 116.485 40.776 5
 0 0 -16 -53.58 54.446 1
 0 0 -16 125.449 56.66 1
 0 0 16 11.709 56.245 1
 0 0 16 79.021 55.246 1
 0 0 16 86.658 47.905 3
 0 0 16 -38.607 40.321 5
 0 0 -17 232.616 64.741 1
 0 0 -17 314.4 65.792 1
 0 0 17 168.229 63.241 1
 0 0 17 162.883 64.022 1
 0 0 17 299.375 57.008 3
 0 0 17 233.796 47.036 5
 0 0 -18 20.573 61.864 1
 0 0 -18 84.616 67.331 1
 0 0 18 -75.337 62.411 1
 0 0 18 124.81 69.695 1
 0 0 18 115.283 55.315 3
 0 0 18 123.668 47.951 5
 0 0 -19 403.354 75.079 1
 0 0 -19 442.536 82.238 1
 0 0 19 465.472 81.211 1
 0 0 19 471.775 87.182 1
 0 0 19 369.844 67.974 3
 0 0 19 253.364 54.023 5
 0 0 -20 -136.936 70.943 1
 0 0 -20 -54.759 78.614 1
 0 0 20 -136.166 70.671 1
 0 0 20 -15.215 77.28 1
 0 0 20 0.361 61.679 3
 0 0 20 -43.977 52.323 5
 0 0 -21 39.271 78.808 1
 0 0 -21 -111.18 86.3 1
 0 0 21 -109.11 84.848 1
 0 0 21 16.889 87.064 1
 0 0 21 -68.971 66.04 3
 0 0 21 -148.062 56.008 5
 0 -1 22 91.958 97.008 1
 0 -1 22 -115.06 67.829 3
 0 -1 22 132.954 69.129 5
 0 1 -22 117.604 89.476 1
 0 1 -22 160.234 108.528 1
 0 -1 21 70.931 88.343 1
 0 -1 21 239.098 72.689 3
 0 -1 21 282.565 67.252 5
 0 1 -21 469.43 85.496 1
 0 1 -21 180.412 91.202 1
 0 -1 20 331.41 79.47 1
 0 -1 20 175.225 66.19 3
 0 -1 20 148.794 58.354 5
 0 1 -20 160.328 77.19 1
 0 1 -20 339.948 87.449 1
 0 -1 19 256.529 76.471 1
 0 -1 19 264.584 77.557 1
 0 -1 19 228.816 67.934 3
 0 -1 19 213.367 86.155 5
 0 1 -19 166.846 71.889 1
 0 1 -19 330.774 79.52 1
 0 -1 18 604.562 77.539 1
 0 -1 18 406.125 75.401 1
 0 -1 18 505.461 67.196 3
 0 -1 18 440.348 58.509 5
 0 1 -18 371.201 67.668 1
 0 1 -18 525.88 80.117 1
 0 -1 17 1452.1 116.2 1
 0 -1 17 1837.8 122.7 1
 0 -1 17 1149.8 91.6 3
 0 -1 17 1653.5 104.1 5
 0 1 -17 1496.3 118.5 1
 0 1 -17 1566 123.2 1
 0 -1 16 710.52 68.14 1
 0 -1 16 963.766 108.108 1
 0 -1 16 486.932 56.101 5
 0 1 -16 549.306 68.68 1
 0 1 -16 899.489 109.344 1
 0 -1 15 -43.645 48.813 1
 0 -1 15 66.751 51.56 1
 0 -1 15 -20.343 42.445 5
 0 1 -15 59.147 49.365 1
 0 1 -15 -21.105 49.357 1
 0 -1 14 166.724 48.164 1
 0 -1 14 121.635 49.52 1
 0 -1 14 132.187 40.674 5
 0 1 -14 161.453 50.135 1
 0 1 -14 114.644 48.959 1
 0 -1 13 529.915 53.924 1
 0 -1 13 478.336 51.341 1
 0 -1 13 452.534 43.367 5
 0 1 -13 508.266 50.212 1
 0 1 -13 517.485 53.867 1
 0 -1 12 -8.364 34.862 1
 0 -1 12 -62.288 35.437 1
 0 -1 12 24.29 31.831 5
 0 1 -12 4.235 34.701 1
 0 1 -12 -31.507 36.36 1
 0 -1 11 1121.5 69 1
 0 -1 11 969.304 68.36 1
 0 -1 11 1136.7 64.3 5
 0 1 -11 1130.3 69.6 1
 0 1 -11 1055.3 69.4 1
 0 -1 10 3205.9 79.1 1
 0 -1 10 3229.9 80.4 1
 0 -1 10 3207.1 76.3 5
 0 1 -10 3271 80.4 1
 0 1 -10 3254.6 79.4 1
 0 -1 9 1353.1 62.4 1
 0 -1 9 1318.3 62.5 1
 0 -1 9 1425.5 60.6 5
 0 1 -9 1478 61.7 1
 0 1 -9 1446.1 61.5 1
 0 -1 8 118.952 30.958 1
 0 -1 8 76.27 28.525 1
 0 -1 8 100.77 26.844 5
 0 1 -8 97.551 28.991 1
 0 1 -8 47.429 25.374 1
 0 -1 7 8644.6 89.5 1
 0 -1 7 8655.8 89.9 1
 0 -1 7 8534.4 87.6 5
 0 1 -7 8610.2 89.7 1
 0 1 -7 8758.4 89.7 1
 0 -1 6 174.964 24.582 1
 0 -1 6 176.834 25.931 1
 0 -1 6 205.695 23.909 5
 0 1 -6 125.411 21.827 1
 0 1 -6 158.968 24.409 1
 0 -1 5 92.389 23.065 1
 0 -1 5 83.031 23.199 1
 0 -1 5 69.365 19.66 5
 0 1 -5 101.385 23.612 1
 0 1 -5 114.592 24.11 1
 0 -1 4 172323 632 1
 0 -1 4 170324 668 5
 0 1 -4 172217 639 1
 0 1 -4 172184 632 1
 0 1 -4 169018 650 5
 0 -1 3 1124.6 37.2 1
 0 -1 3 1066.4 37.6 1
 0 1 -3 1031.4 36.9 1
 0 -1 2 1709 31.6 1
 0 -1 2 1655.2 32.3 5
 0 1 -2 1775.6 31.5 1
 0 1 -2 1699.7 32.4 1
 0 1 -2 1675.6 31.1 4
 0 -1 1 173.126 19.706 1
 0 -1 1 109.846 13.97 1
 0 -1 1 132.828 16.665 4
 0 -1 1 184.851 18.331 5
 0 1 -1 105.726 13.909 1
 0 1 -1 189.76 19.008 1
 0 1 -1 189.858 16.74 4
 0 1 -1 147.762 14.108 5
 0 -1 0 1852.1 28.2 1
 0 -1 0 736.115 30.148 1
 0 -1 0 1577.8 21.7 5
 0 1 0 1859.1 30.2 1
 0 1 0 1855.3 26.6 4
 0 -1 -1 381.584 23.347 1
 0 -1 -1 558.871 23.273 1
 0 -1 -1 442.717 13.257 3
 0 -1 -1 375.365 21.132 4
 0 -1 -1 417.039 13.937 5
 0 1 1 396.979 14.1 5
 0 -1 -2 360713 507 3
 0 1 2 373150 521 3
 0 -1 -3 118070 491 1
 0 -1 -3 120266 470 1
 0 -1 -3 119351 263 3
 0 1 3 118162 481 1
 0 1 3 117776 480 1
 0 1 3 124607 292 3
 0 -1 -4 9630.9 77.9 1
 0 -1 -4 9811.5 78.9 1
 0 1 4 9752.4 77.4 1
 0 1 4 9659.5 76.4 1
 0 1 4 10284.7 52.3 3
 0 -1 -5 7588.7 77.8 1
 0 -1 -5 7621.9 76.9 1
 0 1 5 7426 74.9 1
 0 1 5 7321.5 74.2 1
 0 1 5 7680.8 53.8 3
 0 -1 -6 116213 477 1
 0 -1 -6 116658 406 1
 0 1 6 114650 431 1
 0 1 6 112937 493 1
 0 1 6 117191 318 3
 0 -1 -7 31842.1 164.3 1
 0 -1 -7 32523.1 166.4 1
 0 1 7 31952.9 164.4 1
 0 1 7 31922.8 164 1
 0 1 7 32282.8 125.9 3
 0 -1 -8 560.84 57.929 1
 0 -1 -8 648.166 59.968 1
 0 1 8 657.303 57.07 1
 0 1 8 594.009 60.401 1
 0 1 8 604.132 38.237 3
 0 -1 -9 53640.2 237 1
 0 -1 -9 55165.5 240.9 1
 0 1 9 53812.9 236.8 1
 0 1 9 53456 237 1
 0 1 9 51603.6 184.1 3
 0 1 9 51011.3 184.2 5
 0 -1 -10 2218.8 79.8 1
 0 -1 -10 2533.2 82.4 1
 0 1 10 2340 79.2 1
 0 1 10 2289.5 78.6 1
 0 1 10 2244.4 78.3 3
 0 1 10 2388.3 60.8 5
 0 -1 -11 25149.5 187.6 1
 0 -1 -11 25064.6 186.6 1
 0 1 11 24655.1 184.6 1
 0 1 11 24539.6 184.3 1
 0 1 11 22621.2 141.8 3
 0 1 11 23367.7 145 5
 0 -1 -12 9053 129.4 1
 0 -1 -12 9378.9 133.2 1
 0 1 12 9009.5 130 1
 0 1 12 9043.9 129.5 1
 0 1 12 8171.5 98 3
 0 1 12 8589.6 102.1 5
 0 -1 -13 103.253 45.34 1
 0 -1 -13 114.744 46.361 1
 0 1 13 69.141 43.762 1
 0 1 13 59.856 44.494 1
 0 1 13 116.387 36.978 3
 0 1 13 105.963 32.585 5
 0 -1 -14 -2.881 49.112 1
 0 -1 -14 -41.922 48.53 1
 0 1 14 62.205 48.883 1
 0 1 14 52.364 52.159 1
 0 1 14 80.623 40.216 3
 0 1 14 19.174 34.75 5
 0 -1 -15 91.56 66.716 1
 0 -1 -15 123.799 55.753 1
 0 1 15 207.736 56.545 1
 0 1 15 115.729 59.91 1
 0 1 15 122.168 44.397 3
 0 1 15 98.193 37.731 5
 0 -1 -16 -10.221 57.451 1
 0 -1 -16 110.766 60.143 1
 0 1 16 12.473 52.286 1
 0 1 16 -50.711 55.832 1
 0 1 16 95.315 46.288 3
 0 1 16 9 39.4 5
 0 -1 -17 664.437 77.445 1
 0 -1 -17 382.359 73.916 1
 0 1 17 506.771 70.265 1
 0 1 17 512.799 75.693 1
 0 1 17 502.814 57.844 3
 0 1 17 406.762 49.679 5
 0 -1 -18 68.202 70.539 1
 0 -1 -18 70.844 71.461 1
 0 1 18 66.926 65.788 1
 0 1 18 26.072 65.402 1
 0 1 18 145.263 51.018 3
 0 1 18 20.858 41.434 5
 0 -1 -19 -82.649 72.435 1
 0 -1 -19 -55.362 76.809 1
 0 1 19 86.212 73.848 1
 0 1 19 191.408 74.593 1
 0 1 19 -51.299 54.234 3
 0 -1 -20 126.462 83.784 1
 0 -1 -20 230.257 90.274 1
 0 1 20 206.675 77.88 1
 0 1 20 355.183 85.234 1
 0 1 20 317.596 68.259 3
 0 1 20 163.1 54.143 5
 0 -1 -21 -2.46 85.772 1
 0 -1 -21 250.493 98.715 1
 0 1 21 219.017 91.939 1
 0 1 21 91.029 93.875 1
 0 1 21 168.633 68.321 3
 0 1 21 188.192 57.977 5
 0 -2 22 2712.2 169.4 1
 0 -2 22 3030.5 194.4 1
 0 -2 22 2502.6 143.2 3
 0 -2 22 2713.5 162.4 5
 0 2 -22 3042.9 181.1 1
 0 2 -22 3270.4 318.9 1
 0 -2 21 -59.353 74.503 1
 0 -2 21 122.114 85.311 1
 0 -2 21 22.194 72.169 3
 0 -2 21 -50.879 65.87 5
 0 2 -21 99.737 77.904 1
 0 2 -21 1.317 88.994 1
 0 -2 20 117.786 70.765 1
 0 -2 20 116.278 77.993 1
 0 -2 20 -3.939 64.102 3
 0 -2 20 -63.662 59.807 5
 0 2 -20 13.475 72.202 1
 0 2 -20 103.112 81.02 1
 0 -2 19 -0.05093 65.3035 1
 0 -2 19 -26.216 65.198 1
 0 -2 19 40.247 61.453 3
 0 -2 19 10.339 55.195 5
 0 2 -19 65.467 68.572 1
 0 2 -19 47.498 71.709 1
 0 -2 18 382.524 64.191 1
 0 -2 18 377.154 70.461 1
 0 -2 18 287.81 71.172 5
 0 2 -18 443.682 73.226 1
 0 2 -18 526.679 77.663 1
 0 -2 17 1141.1 111.4 1
 0 -2 17 1306.4 118.3 1
 0 -2 17 1409.9 108.2 5
 0 2 -17 1279.5 119.1 1
 0 2 -17 1402.6 123.4 1
 0 -2 16 17931.8 205.3 1
 0 -2 16 19391 211 1
 0 -2 16 19234.3 206 5
 0 2 -16 19233.8 213 1
 0 2 -16 20390 218.8 1
 0 -2 15 6135.9 183 1
 0 -2 15 5859.3 134.5 5
 0 2 -15 6480.5 136.7 1
 0 2 -15 6444.9 140.7 1
 0 -2 14 45.667 46.174 1
 0 -2 14 -75.578 40.613 5
 0 2 -14 102.859 44.987 1
 0 2 -14 71.648 46.551 1
 0 -2 13 436.735 47.957 1
 0 -2 13 429.752 46.745 5
 0 2 -13 422.342 49.758 1
 0 2 -13 390.933 51.658 1
 0 -2 12 2311.2 84.7 1
 0 -2 12 2195.3 82.5 5
 0 2 -12 2223.2 84.7 1
 0 2 -12 2072.4 82.3 1
 0 -2 11 58.71 30.768 1
 0 -2 11 84.964 36.569 1
 0 -2 11 28.098 30.242 5
 0 2 -11 34.946 34.579 1
 0 2 -11 57.079 33.23 1
 0 -2 10 8518.9 110.7 1
 0 -2 10 8685.7 112.2 1
 0 -2 10 8662.9 112.9 5
 0 2 -10 8793.5 112.9 1
 0 2 -10 8810.7 112.4 1
 0 -2 9 3137.6 75.1 1
 0 -2 9 3144.4 75.2 1
 0 -2 9 3159.2 76.9 5
 0 2 -9 3259.3 77.3 1
 0 2 -9 3388.7 78.3 1
 0 -2 8 294.087 34.211 1
 0 -2 8 275.619 34.21 1
 0 -2 8 256.951 32.836 5
 0 2 -8 300.483 33.911 1
 0 2 -8 324.527 35.543 1
 0 -2 7 7440.9 89.5 1
 0 -2 7 7361 88.2 1
 0 -2 7 7577.9 93.1 5
 0 2 -7 7664 91.4 1
 0 2 -7 7453.7 88.9 1
 0 -2 6 9406.7 92.6 1
 0 -2 6 9642.3 93.2 1
 0 -2 6 9424 95.6 5
 0 2 -6 9376.7 92.7 1
 0 2 -6 9536.6 92.9 1
 0 2 -6 9389.2 93.4 4
 0 2 -6 9620.1 95.7 5
 0 -2 5 15106.8 106.2 1
 0 -2 5 15355.3 107.1 1
 0 2 -5 15356.1 107.4 1
 0 2 -5 15165.9 105.9 4
 0 2 -5 15607.7 111.7 5
 0 -2 4 2614.3 55.2 1
 0 -2 4 2636.3 53.9 1
 0 -2 4 2571 52.8 4
 0 -2 4 2539.4 54.4 5
 0 2 -4 2598.5 54.4 1
 0 2 -4 2679.8 55.8 1
 0 2 -4 2538.6 52.6 4
 0 2 -4 2549.3 55.6 5
 0 -2 3 80155.2 340.8 1
 0 -2 3 81146.7 303 1
 0 -2 3 79609.5 323.9 4
 0 -2 3 78162 322.5 5
 0 2 -3 79991.7 346.6 1
 0 2 -3 81379.8 308.6 1
 0 2 -3 78321.8 295.2 4
 0 2 -3 80420.3 293.5 5
 0 -2 2 13044 90.2 1
 0 -2 2 13598.7 92.4 1
 0 -2 2 13343.5 84.2 4
 0 -2 2 13470.2 87.7 5
 0 2 -2 13343 91.4 1
 0 2 -2 13080.6 89.3 1
 0 2 -2 12916.4 82.3 4
 0 2 -2 13582.1 88.7 5
 0 -2 1 5371.2 62.8 1
 0 -2 1 5451.9 63.5 1
 0 -2 1 5383.6 58 4
 0 -2 1 5212 56.4 5
 0 2 -1 5555.2 65.7 1
 0 2 -1 5497.3 63.9 1
 0 2 -1 5218.5 57.4 4
 0 2 -1 5391.8 58.5 5
 0 -2 0 2290.6 52.5 1
 0 -2 0 2330.4 52.6 1
 0 -2 0 2169.6 46.3 4
 0 -2 0 2257.2 40.3 5
 0 2 0 2357.2 51.4 1
 0 2 0 2243.9 50.1 1
 0 2 0 2126 47.2 4
 0 2 0 2357 42.4 5
 0 -2 -1 259858 887 1
 0 -2 -1 273535 911 1
 0 -2 -1 269265 864 4
 0 -2 -1 269918 697 5
 0 2 1 275775 898 1
 0 2 1 276337 905 1
 0 2 1 267074 851 4
 0 2 1 268628 693 5
 0 -2 -2 78012.7 357.5 1
 0 -2 -2 81485.1 403.1 1
 0 -2 -2 80882.6 134.2 3
 0 -2 -2 77804.2 307.7 4
 0 2 2 79094 314.3 1
 0 2 2 77372.3 275.3 5
 0 -2 -3 66031.2 225.1 1
 0 -2 -3 68141.7 295.2 1
 0 -2 -3 65873.5 115.8 3
 0 2 3 66103.7 251.2 1
 0 2 3 67442.4 298.8 1
 0 2 3 65198.5 220.8 5
 0 -2 -4 112067 519 1
 0 -2 -4 116690 532 1
 0 -2 -4 113001 186 3
 0 2 4 115669 480 1
 0 2 4 113912 484 1
 0 2 4 118863 259 3
 0 -2 -5 6264.4 78.9 1
 0 -2 -5 6623.4 83.2 1
 0 2 5 6384 80.3 1
 0 2 5 6359.2 80.4 1
 0 2 5 6737.3 46.7 3
 0 -2 -6 803.731 54.927 1
 0 -2 -6 848.061 55.476 1
 0 2 6 859.556 54.727 1
 0 2 6 827.176 55.465 1
 0 2 6 740.834 28.944 3
 0 -2 -7 26804.7 164.4 1
 0 -2 -7 27337.8 164.7 1
 0 2 7 27272.2 164.8 1
 0 2 7 26985.1 163.9 1
 0 2 7 26642.1 104.1 3
 0 -2 -8 12624.8 126.7 1
 0 -2 -8 12307.4 123.4 1
 0 2 8 12248.6 123.1 1
 0 2 8 12198.1 122.7 1
 0 2 8 11764.6 78.2 3
 0 -2 -9 35421.4 207 1
 0 -2 -9 36107.9 207.8 1
 0 2 9 35312.4 204.8 1
 0 2 9 35557.2 206.3 1
 0 2 9 33638.3 136.1 3
 0 -2 -10 838.946 73.948 1
 0 -2 -10 842.91 70.865 1
 0 2 10 845.035 69.23 1
 0 2 10 615.66 72.161 1
 0 2 10 738.678 40.64 3
 0 2 10 729.419 45.302 5
 0 -2 -11 20.356 36.787 1
 0 -2 -11 -12.604 37.837 1
 0 2 11 32.177 36.77 1
 0 2 11 59.166 41.241 1
 0 2 11 37.375 27.87 3
 0 2 11 17.829 24.219 5
 0 -2 -12 -41.756 41.44 1
 0 -2 -12 23.232 41.502 1
 0 2 12 18.071 40.918 1
 0 2 12 67.158 47.975 1
 0 2 12 -19.904 26.993 3
 0 2 12 13.922 26.977 5
 0 -2 -13 765.404 92.6 1
 0 -2 -13 644.79 63.602 1
 0 2 13 726.035 87.8 1
 0 2 13 611.936 63.145 1
 0 2 13 640.571 52.804 3
 0 2 13 694.485 58.926 5
 0 -2 -14 4183.6 126.6 1
 0 -2 -14 4292.5 124.7 1
 0 2 14 4280.7 184.7 1
 0 2 14 4022 126.8 1
 0 2 14 3626.4 78.1 3
 0 2 14 3881.2 83.8 5
 0 -2 -15 60.395 56.249 1
 0 -2 -15 127.992 57.723 1
 0 2 15 193.596 56.774 1
 0 2 15 -61.771 56.376 1
 0 2 15 62.406 39.436 3
 0 2 15 49.702 35.734 5
 0 -2 -16 -83.342 58.799 1
 0 -2 -16 -88.225 56.916 1
 0 2 16 85.305 56.558 1
 0 2 16 15.733 63.727 1
 0 2 16 25.735 39.963 3
 0 2 16 26.968 36.286 5
 0 -2 -17 133.041 66.949 1
 0 -2 -17 -23.045 59.359 1
 0 2 17 -9.743 58.692 1
 0 2 17 -98.262 63.013 1
 0 2 17 3.754 43.625 3
 0 2 17 13.755 38.266 5
 0 -2 -18 1160.1 134.9 1
 0 -2 -18 1215.1 132.3 1
 0 2 18 1154.2 129.5 1
 0 2 18 1407 137.5 1
 0 2 18 1334.6 83.2 3
 0 2 18 1114.7 84.8 5
 0 -2 -19 184.625 80.046 1
 0 -2 -19 76.227 76.044 1
 0 2 19 144.069 75.489 1
 0 2 19 198.035 74.641 1
 0 2 19 256.066 56.965 3
 0 2 19 49.164 45.838 5
 0 -2 -20 80.349 84.321 1
 0 -2 -20 -74.678 79.645 1
 0 2 20 -5.855 82.151 1
 0 2 20 89.589 87.005 1
 0 2 20 134.029 59.074 3
 0 2 20 84.132 47.05 5
 0 3 -22 -90.709 89.83 1
 0 -3 21 908.327 94.626 1
 0 -3 21 1014.9 105.6 1
 0 -3 21 793.06 94.282 3
 0 -3 21 701.257 83.423 5
 0 3 -21 1009.8 102 1
 0 3 -21 623.946 101.245 1
 0 3 -21 685.616 100.457 4
 0 -3 20 158.672 69.729 1
 0 -3 20 26.024 72.512 1
 0 -3 20 44.957 64.285 5
 0 3 -20 -35.668 69.612 1
 0 3 -20 172.314 81.931 1
 0 3 -20 43.017 76.868 4
 0 -3 19 859.867 81.206 1
 0 -3 19 832.881 84.846 1
 0 -3 19 521.119 69.655 5
 0 3 -19 781.313 87.558 1
 0 3 -19 770.838 92.45 1
 0 3 -19 682.587 84.969 4
 0 -3 18 600.892 73.747 1
 0 -3 18 489.607 77.669 1
 0 -3 18 394.814 64.173 5
 0 3 -18 500.661 76.237 1
 0 3 -18 412.642 79.07 1
 0 3 -18 447.736 74.737 4
 0 -3 17 2285.7 126.6 1
 0 -3 17 2131.5 126.6 1
 0 -3 17 2175.8 123.1 5
 0 3 -17 1820.2 124.2 1
 0 3 -17 2089.2 126.3 1
 0 3 -17 1879.9 129.7 4
 0 -3 16 23817.9 241.2 1
 0 -3 16 24972.1 244.9 1
 0 -3 16 23845.3 252.3 5
 0 3 -16 24019.9 240.9 1
 0 3 -16 24883.1 243.2 1
 0 3 -16 23394 249.6 4
 0 -3 15 10692.4 174.1 1
 0 -3 15 11035.4 173.5 1
 0 -3 15 11293.7 174 5
 0 3 -15 11309.8 184.1 1
 0 3 -15 11255.2 172.2 1
 0 3 -15 10076.9 245.1 4
 0 -3 14 776.654 66.946 1
 0 -3 14 1116.4 100.8 1
 0 -3 14 799.751 95.801 5
 0 3 -14 1082.4 100.3 1
 0 3 -14 1157.6 99.6 1
 0 3 -14 1060.9 101.9 4
 0 -3 13 7208.2 130.7 1
 0 -3 13 7462.6 132.8 1
 0 -3 13 7306 134.1 5
 0 3 -13 7570.9 133.4 1
 0 3 -13 7725.7 132.9 1
 0 3 -13 7401.8 136.6 4
 0 -3 12 123.495 41.249 1
 0 -3 12 97.529 41.707 1
 0 -3 12 116.806 37.529 5
 0 3 -12 109.011 41.096 1
 0 3 -12 101.187 42.671 1
 0 3 -12 99.276 39.72 4
 0 -3 11 4004.9 94.2 1
 0 -3 11 4058.3 94.4 1
 0 -3 11 4094.8 98.2 5
 0 3 -11 4067 96.7 1
 0 3 -11 4100.9 95.2 1
 0 3 -11 4103.9 98.5 4
 0 -3 10 100.739 32.916 1
 0 -3 10 167.134 33.735 1
 0 -3 10 147.214 32.848 5
 0 3 -10 123.86 37.005 1
 0 3 -10 220.821 38.513 1
 0 3 -10 180.941 34.122 4
 0 -3 9 329.876 34.826 1
 0 -3 9 450.909 56.106 1
 0 -3 9 338.349 35.322 5
 0 3 -9 382.106 40.925 1
 0 3 -9 462.319 56.486 1
 0 3 -9 374.782 39.004 4
 0 -3 8 729.021 57.761 1
 0 -3 8 781.369 58.064 1
 0 -3 8 648.446 60.352 5
 0 3 -8 749.461 59.859 1
 0 3 -8 751.741 58.129 1
 0 3 -8 671.143 60.071 4
 0 3 -8 641.746 59.541 5
 0 -3 7 8999.6 106.6 1
 0 -3 7 9112.8 106.5 1
 0 -3 7 9082.2 109.3 5
 0 3 -7 8829 106.5 1
 0 3 -7 8896.2 105 4
 0 3 -7 8941.9 108.1 5
 0 -3 6 20101.2 143 1
 0 -3 6 20267.4 142.5 1
 0 -3 6 20269.3 145.8 5
 0 3 -6 20576.2 143.9 1
 0 3 -6 20670.4 144.7 1
 0 3 -6 20528.4 140 4
 0 3 -6 21118.4 149.1 5
 0 -3 5 0.587 25.594 1
 0 -3 5 17.003 26.222 1
 0 -3 5 -6.885 23.883 4
 0 -3 5 24.025 22.608 5
 0 3 -5 8.058 27.077 1
 0 3 -5 10.497 27.351 1
 0 3 -5 -5.418 22.788 4
 0 3 -5 -8.696 23.19 5
 0 -3 4 1567.1 55.1 1
 0 -3 4 1591.7 56.8 1
 0 -3 4 1439.3 51.9 4
 0 -3 4 1588.2 54.3 5
 0 3 -4 1487.4 54.6 1
 0 3 -4 1525.9 54.6 1
 0 3 -4 1404.5 48.9 4
 0 3 -4 1499.8 54.4 5
 0 -3 3 31461.9 158.6 1
 0 -3 3 32319.1 160.8 1
 0 -3 3 32266.4 149.8 4
 0 -3 3 32454.2 155.9 5
 0 3 -3 32405.3 161.1 1
 0 3 -3 31095.6 156.8 1
 0 3 -3 31628.5 147.7 4
 0 3 -3 32139.2 155.5 5
 0 -3 2 19976.6 125.6 1
 0 -3 2 20185.2 127.3 1
 0 -3 2 19648.6 116 4
 0 -3 2 20219.1 118.6 5
 0 3 -2 20750.3 129.3 1
 0 3 -2 20126.2 126.5 1
 0 3 -2 19801.6 115.9 4
 0 3 -2 20189.2 118.7 5
 0 -3 1 7079.6 81.5 1
 0 -3 1 7107.9 81.3 1
 0 -3 1 7099.7 75.7 4
 0 -3 1 7071.6 71.8 5
 0 3 -1 7358.2 83.2 1
 0 3 -1 7049.9 81.6 1
 0 3 -1 7102 75.5 4
 0 3 -1 7157.9 72.3 5
 0 -3 0 41616.4 176.5 1
 0 -3 0 43404.4 180.4 1
 0 -3 0 41735.8 164.9 4
 0 -3 0 41164.9 146.4 5
 0 3 0 41602.2 175.7 1
 0 3 0 41814.3 176.2 1
 0 3 0 42418.4 166.3 4
 0 3 0 41677.1 147.8 5
 0 -3 -1 6890.8 81.2 1
 0 -3 -1 7188.9 84.8 1
 0 -3 -1 7014.7 79.9 4
 0 -3 -1 7019.1 62.8 5
 0 3 1 7147.1 84.2 1
 0 3 1 7165.9 84.2 1
 0 3 1 7061.6 78 4
 0 3 1 7006.2 63.8 5
 0 -3 -2 64843.2 226.4 1
 0 -3 -2 62740.8 222 1
 0 -3 -2 63164.6 215.5 4
 0 -3 -2 63091.8 202.3 5
 0 3 2 64570.2 225.5 1
 0 3 2 63089.9 222.9 1
 0 3 2 63166.6 214.4 4
 0 3 2 63013.3 188 5
 0 -3 -3 284.032 33.937 1
 0 -3 -3 267.808 30.821 1
 0 -3 -3 282.996 28.501 4
 0 3 3 414.904 36.049 1
 0 3 3 219.782 29.086 1
 0 3 3 363.522 28.939 5
 0 -3 -4 336.682 35.663 1
 0 -3 -4 273.16 33.251 1
 0 -3 -4 256.65 30.563 4
 0 3 4 324.187 35.873 1
 0 3 4 263.526 31.087 1
 0 3 4 296.304 27.08 5
 0 -3 -5 250.758 33.338 1
 0 -3 -5 420.547 40.368 1
 0 -3 -5 271.249 30.607 4
 0 3 5 265.751 34.338 1
 0 3 5 346.709 35.995 1
 0 3 5 290.699 27.44 5
 0 -3 -6 5716.6 92.4 1
 0 -3 -6 5658.6 92.9 1
 0 3 6 5687.1 92.9 1
 0 3 6 5440.7 90.9 1
 0 3 6 5567 49.3 3
 0 3 6 5289.9 49.7 5
 0 -3 -7 68.589 33.658 1
 0 -3 -7 11.877 34.287 1
 0 3 7 16.311 33.333 1
 0 3 7 52.088 33.342 1
 0 3 7 -2.38 18.511 3
 0 -3 -8 1439 74.1 1
 0 -3 -8 1376.7 74.1 1
 0 3 8 1411.4 73.2 1
 0 3 8 1412.9 72.5 1
 0 3 8 1348.6 37.3 3
 0 -3 -9 13548.2 147 1
 0 -3 -9 14203.9 149.8 1
 0 3 9 13683.4 146.4 1
 0 3 9 13586.2 145.4 1
 0 3 9 13182.9 81.8 3
 0 -3 -10 414.327 52.021 1
 0 -3 -10 368.296 49.046 1
 0 3 10 396.731 48.263 1
 0 3 10 434.808 51.093 1
 0 3 10 374.275 38.003 3
 0 -3 -11 -86.951 41.649 1
 0 -3 -11 19.113 43.541 1
 0 3 11 -3.902 40.829 1
 0 3 11 4.711 42.994 1
 0 3 11 36.295 25.652 3
 0 3 11 8.725 22.705 5
 0 -3 -12 3211.3 111.9 1
 0 -3 -12 3348.4 112.9 1
 0 3 12 3238.9 108.9 1
 0 3 12 3341.3 112.7 1
 0 3 12 2887 60.5 3
 0 3 12 3036.9 63.9 5
 0 -3 -13 1963.5 107.6 1
 0 -3 -13 2063.1 109.7 1
 0 3 13 1782.7 134.5 1
 0 3 13 1908.3 111.1 1
 0 3 13 1713 68.4 3
 0 3 13 1769.8 60.9 5
 0 -3 -14 172.548 60.903 1
 0 -3 -14 192.35 60.397 1
 0 3 14 138.303 55.088 1
 0 3 14 255.863 64.414 1
 0 3 14 204.524 38.665 3
 0 3 14 111.286 31.578 5
 0 -3 -15 3524 136.1 1
 0 -3 -15 3318.1 133.6 1
 0 3 15 3247 125.9 1
 0 3 15 3097.1 138.8 1
 0 3 15 2753.6 73.7 3
 0 3 15 2838.5 73.8 5
 0 -3 -16 1134 124 1
 0 -3 -16 1384.3 127.9 1
 0 3 16 1112.9 116.8 1
 0 3 16 1527.4 131.2 1
 0 3 16 1032.1 68.7 3
 0 3 16 1154.8 67.6 5
 0 -3 -17 52.65 72.028 1
 0 -3 -17 41.973 72.899 1
 0 3 17 121.848 67.661 1
 0 3 17 -67.035 72.312 1
 0 3 17 129.776 46.036 3
 0 3 17 60.585 36.51 5
 0 -3 -18 -172.462 75.678 1
 0 -3 -18 129.874 79.636 1
 0 3 18 -53.273 69.213 1
 0 3 18 38.071 81.269 1
 0 3 18 11.789 51.083 3
 0 3 18 -33.234 35.659 5
 0 -3 -19 516.172 95.853 1
 0 -3 -19 317.172 93.375 1
 0 3 19 401.235 86.268 1
 0 3 19 447.334 98.257 1
 0 3 19 487.835 62.918 3
 0 3 19 461.479 46.49 5
 0 -3 -20 73.807 91.917 1
 0 3 20 119.38 87.94 1
 0 3 20 -203.135 87.162 1
 0 3 20 126.752 65.649 3
 0 3 20 -4.252 43.646 5
 0 -4 21 250.565 83.777 1
 0 -4 21 138.854 85.132 1
 0 -4 21 239.895 77.512 5
 0 4 -21 173.046 83.543 1
 0 4 -21 -137.485 91.236 1
 0 4 -21 46.109 83.632 4
 0 -4 20 -50.04 71.58 1
 0 -4 20 24.345 78.362 1
 0 -4 20 53.366 68.716 5
 0 4 -20 -45.094 75.237 1
 0 4 -20 15.634 77.43 1
 0 4 -20 -91.377 70.459 4
 0 -4 19 662.244 78.13 1
 0 -4 19 614.49 85.715 1
 0 -4 19 594.184 75.787 5
 0 4 -19 571.93 85.699 1
 0 4 -19 820.025 91.096 1
 0 4 -19 587.663 84.516 4
 0 -4 18 30.506 62.517 1
 0 -4 18 184.843 69.454 1
 0 -4 18 -25.108 56.296 5
 0 4 -18 42.719 63.849 1
 0 4 -18 -31.813 66.596 1
 0 4 -18 12.434 64.577 4
 0 -4 17 67.782 58.204 1
 0 -4 17 178.239 66.682 1
 0 -4 17 86.228 57.234 5
 0 4 -17 112.362 64.186 1
 0 4 -17 123.953 64.602 1
 0 4 -17 64.45 59.391 4
 0 -4 16 -17.781 62.65 1
 0 -4 16 -88.754 61.596 1
 0 -4 16 80.371 55.416 5
 0 4 -16 -43.931 59.067 1
 0 4 -16 -9.719 63.225 1
 0 4 -16 -15.277 56.311 4
 0 -4 15 40153.4 296.8 1
 0 -4 15 41290.9 302 1
 0 -4 15 36984.8 356 5
 0 4 -15 41918 303.8 1
 0 4 -15 42805 305.8 1
 0 4 -15 41681 314.7 4
 0 -4 14 15470.2 193.8 1
 0 -4 14 14150.4 247.7 1
 0 -4 14 15462.7 199.4 5
 0 4 -14 15435.4 192.9 1
 0 4 -14 16079.2 198.9 1
 0 4 -14 15939.6 198.5 4
 0 -4 13 45040.4 289.4 1
 0 -4 13 46262 293.2 1
 0 -4 13 46873 302.9 5
 0 4 -13 46747.4 295.2 1
 0 4 -13 46588.7 294 1
 0 4 -13 46519.9 296.8 4
 0 -4 12 31131.9 234.5 1
 0 -4 12 32257.8 237.2 1
 0 -4 12 32527.3 246.6 5
 0 4 -12 32336.3 240.9 1
 0 4 -12 32772.4 240 1
 0 4 -12 32946.5 242.3 4
 0 -4 11 723.124 76.011 1
 0 -4 11 803.369 76.228 1
 0 -4 11 792.028 79.448 5
 0 4 -11 792.25 80.726 1
 0 4 -11 871.727 73.934 1
 0 4 -11 868.544 75.704 4
 0 -4 10 92.179 39.638 1
 0 -4 10 105.828 37.881 1
 0 -4 10 78.632 35.695 5
 0 4 -10 121.938 41.663 1
 0 4 -10 84.943 38.298 1
 0 4 -10 79.495 35.063 4
 0 -4 9 1691.3 77.5 1
 0 -4 9 1744 76 1
 0 -4 9 1657 77.5 5
 0 4 -9 1727.7 78.5 1
 0 4 -9 1833 74.2 1
 0 4 -9 1666.4 73.8 4
 0 4 -9 1613.3 74.7 5
 0 -4 8 167.234 37.189 1
 0 -4 8 128.597 34.555 1
 0 -4 8 169.614 33.924 5
 0 4 -8 182.195 37.043 1
 0 4 -8 165.237 39.109 1
 0 4 -8 123.4 34.554 4
 0 4 -8 84.471 29.384 5
 0 -4 7 17854.8 153.5 1
 0 -4 7 18602.7 156.6 1
 0 -4 7 18448.3 158.8 5
 0 4 -7 18483.1 156.2 1
 0 4 -7 18496.7 157.7 1
 0 4 -7 18250.2 149 4
 0 4 -7 18415.3 158.8 5
 0 -4 6 491.244 58.282 1
 0 -4 6 472.4 58.369 1
 0 -4 6 337.031 38.919 4
 0 -4 6 486.231 59.378 5
 0 4 -6 497.308 57.396 1
 0 4 -6 384.532 40.322 1
 0 4 -6 249.307 32.999 4
 0 4 -6 324.381 35.554 5
 0 -4 5 32958.8 193.5 1
 0 -4 5 33653.8 195.6 1
 0 -4 5 32779.1 181.6 4
 0 -4 5 33094.2 191.6 5
 0 4 -5 33548.2 195.5 1
 0 4 -5 32830.4 192.7 1
 0 4 -5 31969.1 178.6 4
 0 4 -5 33414 193.1 5
 0 -4 4 179.732 34.948 1
 0 -4 4 231.669 38.588 1
 0 -4 4 209.343 32.879 4
 0 -4 4 245.397 31.399 5
 0 4 -4 188.232 35.976 1
 0 4 -4 212.541 37.896 1
 0 4 -4 196.086 30.074 4
 0 4 -4 200.914 31.675 5
 0 -4 3 2167.4 66 1
 0 -4 3 2252.3 73.1 1
 0 -4 3 1950.3 63 4
 0 -4 3 2155.6 64.1 5
 0 4 -3 2147.1 72.1 1
 0 4 -3 2164.1 68.9 1
 0 4 -3 1830.1 60.4 4
 0 4 -3 2192.6 65.3 5
 0 -4 2 24830 162.1 1
 0 -4 2 25978.8 166.4 1
 0 -4 2 25038 150.9 4
 0 -4 2 24782.7 148.2 5
 0 4 -2 25938.7 166.8 1
 0 4 -2 25143.1 164.1 1
 0 4 -2 24995.8 149.6 4
 0 4 -2 25271.3 150 5
 0 -4 1 27267.3 169.4 1
 0 -4 1 28128.9 171.4 1
 0 -4 1 27420.8 156.8 4
 0 -4 1 27442.2 147.7 5
 0 4 -1 28465 173.2 1
 0 4 -1 27470.4 169.4 1
 0 4 -1 27198.7 155.4 4
 0 4 -1 27370 148.2 5
 0 -4 0 7108.5 97.7 1
 0 -4 0 7514.1 99.7 1
 0 -4 0 7323.8 91.2 4
 0 -4 0 7202 79.2 5
 0 4 0 7461.6 99.5 1
 0 4 0 7188.3 97.1 1
 0 4 0 7321.3 89.5 4
 0 4 0 7062.2 79.9 5
 0 -4 -1 -1.702 30.774 1
 0 -4 -1 -12.345 30.565 1
 0 -4 -1 48.389 27.772 4
 0 -4 -1 48.406 20.619 5
 0 4 1 27.455 26.778 1
 0 4 1 37.461 31.98 1
 0 4 1 43.725 24.808 4
 0 4 1 33.018 21.127 5
 0 -4 -2 7759.6 103.2 1
 0 -4 -2 7863.4 104.5 1
 0 -4 -2 7790.9 98.3 4
 0 -4 -2 7609.8 72.7 5
 0 4 2 7765 102.8 1
 0 4 2 7670.2 102.5 1
 0 4 2 7599.2 94.3 4
 0 4 2 7537.9 74.1 5
 0 -4 -3 67.65 33.042 1
 0 -4 -3 87.758 31.682 1
 0 -4 -3 111.262 29.698 4
 0 4 3 109.657 32.992 1
 0 4 3 100.919 33.114 1
 0 4 3 76.924 19.655 5
 0 -4 -4 1350.7 69.2 1
 0 -4 -4 1268 67.5 1
 0 -4 -4 1357.8 63.7 4
 0 4 4 1278.9 66.3 1
 0 4 4 1330.9 68 1
 0 4 4 1281.8 39.6 5
 0 -4 -5 1569.5 70.9 1
 0 -4 -5 1566.1 74.9 1
 0 -4 -5 1484.1 69 4
 0 4 5 1493.7 69.8 1
 0 4 5 1538.1 71.5 1
 0 4 5 1527.7 39.6 5
 0 -4 -6 99.09 35.177 1
 0 -4 -6 205.488 41.345 1
 0 -4 -6 62.088 32.546 4
 0 4 6 136.011 36.642 1
 0 4 6 140.38 37.75 1
 0 4 6 123.544 17.583 5
 0 -4 -7 3097.4 88.8 1
 0 -4 -7 3160 91.1 1
 0 -4 -7 3059.9 90 4
 0 4 7 3047.9 88 1
 0 4 7 2991.2 88.3 1
 0 4 7 2837.3 44.2 5
 0 -4 -8 263.211 45.506 1
 0 -4 -8 282.094 48.205 1
 0 -4 -8 255.302 43.816 4
 0 4 8 278.403 47.052 1
 0 4 8 353.984 48.855 1
 0 4 8 244.151 20.611 5
 0 -4 -9 2885.1 100.3 1
 0 -4 -9 2957.5 100.4 1
 0 4 9 2739.6 99 1
 0 4 9 2678 99 1
 0 4 9 2494.3 44.6 5
 0 -4 -10 2036.7 99.8 1
 0 -4 -10 2070.3 100.2 1
 0 4 10 2267.7 101.6 1
 0 4 10 2036 99.5 1
 0 -4 -11 164.467 57.863 1
 0 -4 -11 211.861 57.154 1
 0 4 11 109.886 52.517 1
 0 4 11 98.207 52.217 1
 0 4 11 139.527 21.79 5
 0 -4 -12 -47.806 91.565 1
 0 -4 -12 42.664 54.774 1
 0 4 12 55.974 53.079 1
 0 4 12 103.236 54.321 1
 0 4 12 20.15 22.404 5
 0 -4 -13 -22.267 57.4 1
 0 -4 -13 -19.652 59.786 1
 0 4 13 31.805 53.597 1
 0 4 13 -18.551 60.056 1
 0 -4 -14 252.018 71.583 1
 0 -4 -14 221.499 69.585 1
 0 4 14 212.478 67.091 1
 0 4 14 311.573 71.989 1
 0 -4 -15 373.981 75.176 1
 0 -4 -15 215.096 76.012 1
 0 4 15 234.931 65.264 1
 0 4 15 310.025 77.761 1
 0 -4 -16 -31.926 71.521 1
 0 -4 -16 -77.898 71.517 1
 0 4 16 38.661 65.741 1
 0 4 16 168.212 79.682 1
 0 -4 -17 22.291 76.675 1
 0 -4 -17 186.722 84.182 1
 0 4 17 28.869 69.129 1
 0 4 17 214.554 88.224 1
 0 -4 -18 225.919 89.177 1
 0 -4 -18 191.751 93.175 1
 0 4 18 -90.494 78.902 1
 0 4 18 44.153 98.218 1
 0 -4 -19 -166.527 83.131 1
 0 -4 -19 -78.958 120.812 1
 0 4 19 -63.493 84.35 1
 0 4 19 -168.914 93.069 1
 0 -5 21 316.931 90.895 1
 0 -5 21 207.707 92.562 1
 0 -5 21 228.683 80.58 5
 0 5 -21 415.222 100.279 1
 0 5 -21 349.074 100.969 1
 0 5 -21 177.802 89.977 4
 0 -5 20 74.966 138.582 1
 0 -5 20 40.154 84.3 1
 0 -5 20 14.195 69.599 5
 0 5 -20 90.699 76.423 1
 0 5 -20 81.922 82.633 1
 0 5 -20 -61.885 78.333 4
 0 -5 19 170.739 79.475 1
 0 -5 19 159.657 77.569 1
 0 -5 19 110.734 69.191 5
 0 5 -19 162.141 71.901 1
 0 5 -19 225.514 143.049 1
 0 5 -19 179.715 79.199 4
 0 -5 18 56.069 66.136 1
 0 -5 18 -95.146 64.252 1
 0 -5 18 40.918 66.329 5
 0 5 -18 -84.129 68.594 1
 0 5 -18 76.19 74.243 1
 0 5 -18 -4.662 67.117 4
 0 -5 17 321.933 72.92 1
 0 -5 17 407.421 72.822 1
 0 -5 17 333.877 68.878 5
 0 5 -17 373.266 72.818 1
 0 5 -17 542.006 77.794 1
 0 5 -17 406.982 73.214 4
 0 -5 16 3643.5 135.5 1
 0 -5 16 3496.3 141.9 1
 0 -5 16 3793.1 145.3 5
 0 5 -16 3819.9 147.2 1
 0 5 -16 3834.6 144.7 1
 0 5 -16 3822.3 141.9 4
 0 -5 15 1200.1 116.3 1
 0 -5 15 1208.1 116.2 1
 0 -5 15 1232.1 120.1 5
 0 5 -15 1350.9 121.5 1
 0 5 -15 1269 120.7 1
 0 5 -15 1570 115.6 4
 0 -5 14 8379.6 166 1
 0 -5 14 8749.8 168 1
 0 -5 14 8633.6 170.2 5
 0 5 -14 8895.5 170.7 1
 0 5 -14 8503 166 1
 0 5 -14 7817.6 220.5 4
 0 -5 13 7743 153 1
 0 -5 13 7183.6 162 1
 0 -5 13 6754.6 230.2 5
 0 5 -13 7574.1 156.1 1
 0 5 -13 7714.4 149.9 1
 0 5 -13 8010.8 153.4 4
 0 -5 12 5704.1 134.8 1
 0 -5 12 5875.5 135.4 1
 0 -5 12 6060 140.2 5
 0 5 -12 5687.4 138.1 1
 0 5 -12 5928.4 133.3 1
 0 5 -12 6146.9 131.9 4
 0 -5 11 4283.8 117.1 1
 0 -5 11 4367.6 115 1
 0 -5 11 4310.4 120.2 5
 0 5 -11 4361.5 121.6 1
 0 5 -11 4289.6 114.8 1
 0 5 -11 4515.8 114 4
 0 -5 10 1029.7 82.1 1
 0 -5 10 917.001 81.679 1
 0 -5 10 1013.4 86.9 5
 0 5 -10 1124.3 86.6 1
 0 5 -10 1146.4 79.1 4
 0 5 -10 1147 83.3 5
 0 -5 9 982.59 79.023 1
 0 -5 9 948.273 75.862 1
 0 -5 9 847.308 79.185 5
 0 5 -9 856.322 76.85 1
 0 5 -9 984.437 78.188 1
 0 5 -9 888.447 72.171 4
 0 5 -9 1014.7 76.8 5
 0 -5 8 2023.2 83.3 1
 0 -5 8 2177.8 85.5 1
 0 -5 8 2169.8 86.9 5
 0 5 -8 2007.2 82.8 1
 0 5 -8 2032.5 86 1
 0 5 -8 2001.1 77.3 4
 0 5 -8 2035.8 83.1 5
 0 -5 7 9067.2 127.8 1
 0 -5 7 9168.1 127.4 1
 0 -5 7 9101.7 120.7 4
 0 -5 7 8934.5 127.2 5
 0 5 -7 9320.6 128.3 1
 0 5 -7 8889.6 126.6 1
 0 5 -7 8906.6 118.8 4
 0 5 -7 9025.3 128.5 5
 0 -5 6 577.716 66.292 1
 0 -5 6 504.34 47.937 1
 0 -5 6 460.872 43.71 4
 0 -5 6 580.806 66.123 5
 0 5 -6 544.894 66.353 1
 0 5 -6 645.14 65.52 1
 0 5 -6 333.495 35.715 4
 0 5 -6 504.81 45.436 5
 0 -5 5 374.068 42.646 1
 0 -5 5 358.45 45.41 1
 0 -5 5 200.222 39.09 4
 0 -5 5 304.43 36.28 5
 0 5 -5 460.646 48.617 1
 0 5 -5 531.368 63.417 1
 0 5 -5 198.498 39.121 4
 0 5 -5 388.273 40.647 5
 0 -5 4 59201 279.1 1
 0 -5 4 61009.7 284.4 1
 0 -5 4 59662.4 260.4 4
 0 -5 4 60088.4 267.2 5
 0 5 -4 61390.5 285.4 1
 0 5 -4 59428.8 279.8 1
 0 5 -4 59871.9 259.7 4
 0 5 -4 60382.3 268.4 5
 0 -5 3 83001.2 326.1 1
 0 -5 3 87095.4 334.6 1
 0 -5 3 82434.2 299.2 4
 0 -5 3 85093.4 304.8 5
 0 5 -3 85827.3 332.9 1
 0 5 -3 84314.3 328.9 1
 0 5 -3 83508.4 300.5 4
 0 5 -3 83614.3 303.5 5
 0 -5 2 8351.5 118.5 1
 0 -5 2 8617.1 122.1 1
 0 -5 2 8412 109.1 4
 0 -5 2 8529.4 104.1 5
 0 5 -2 8795.3 123.7 1
 0 5 -2 8501.8 120.1 1
 0 5 -2 8309.8 107.1 4
 0 5 -2 8643.9 107.1 5
 0 -5 1 15244.3 148.2 1
 0 -5 1 15319.5 149.6 1
 0 -5 1 15332.2 136 4
 0 -5 1 15449.2 127.4 5
 0 5 -1 15386.1 150.4 1
 0 5 -1 15194.8 147.2 1
 0 5 -1 15689.4 137.6 4
 0 5 -1 15398.6 128.6 5
 0 -5 0 452.804 46.126 1
 0 -5 0 458.481 46.95 1
 0 -5 0 367.114 37.567 4
 0 -5 0 439.3 47.25 5
 0 5 0 379.606 43.108 1
 0 5 0 257.515 34.89 1
 0 5 0 452.462 54.695 4
 0 5 0 512.165 50.505 5
 0 -5 -1 3387.2 87.2 1
 0 -5 -1 3437.9 89.6 1
 0 -5 -1 3345 81 4
 0 -5 -1 3333.8 65.6 5
 0 5 1 3269.8 85.8 1
 0 5 1 3370.8 89.1 1
 0 5 1 3203 76.8 4
 0 5 1 3224.5 66.9 5
 0 -5 -2 1405.2 74.6 1
 0 -5 -2 1314.7 73.9 1
 0 -5 -2 1614.6 71.4 4
 0 -5 -2 1440.4 50.4 5
 0 5 2 1446.5 73 1
 0 5 2 1480.2 76 1
 0 5 2 1382 64.4 4
 0 5 2 1403.8 52.8 5
 0 -5 -3 37.631 36.47 1
 0 -5 -3 -15.44 35.433 1
 0 -5 -3 27.122 32.984 4
 0 5 3 67.195 35.376 1
 0 5 3 -16.632 34.613 1
 0 5 3 36.114 21.802 5
 0 -5 -4 38.829 39.782 1
 0 -5 -4 52.262 33.999 1
 0 -5 -4 101.335 35.54 4
 0 5 4 85.093 38.853 1
 0 5 4 94.807 39.453 1
 0 5 4 53.877 21.444 5
 0 -5 -5 1293.1 80.3 1
 0 -5 -5 1192.3 77.7 1
 0 -5 -5 1209.8 76 4
 0 5 5 1098.7 77.7 1
 0 5 5 1110.3 78.3 1
 0 5 5 1142.6 44.4 5
 0 -5 -6 273.17 46.182 1
 0 -5 -6 281.875 43.381 1
 0 -5 -6 246.333 41.378 4
 0 5 6 302.162 48.638 1
 0 5 6 372.631 50.753 1
 0 5 6 279.92 24.039 5
 0 -5 -7 2456.3 97.7 1
 0 -5 -7 2369.2 97.2 1
 0 -5 -7 2512.3 97.8 4
 0 5 7 2532.8 100.1 1
 0 5 7 2400.4 98.3 1
 0 5 7 2238.5 47.3 5
 0 -5 -8 157.737 50.372 1
 0 -5 -8 454.433 61.305 1
 0 -5 -8 199.554 48.07 4
 0 5 8 201.35 54.297 1
 0 5 8 144.276 51.294 1
 0 5 8 167.735 21.269 5
 0 -5 -9 2366.5 110.1 1
 0 -5 -9 2023.6 110.1 1
 0 -5 -9 2220.6 109.8 4
 0 5 9 2426.2 109 1
 0 5 9 2341.2 106.3 1
 0 -5 -10 -21.847 54.667 1
 0 -5 -10 -74.833 50.87 1
 0 -5 -10 -76.653 46.662 4
 0 5 10 44.534 51.857 1
 0 5 10 10.081 54.052 1
 0 -5 -11 96.12 61.934 1
 0 -5 -11 130.499 63.56 1
 0 -5 -11 160.077 65.134 4
 0 5 11 140.264 58.228 1
 0 5 11 74.275 57.383 1
 0 -5 -12 9.868 63.422 1
 0 -5 -12 25.364 60.427 1
 0 -5 -12 -35.055 54.334 4
 0 5 12 -125.14 54.723 1
 0 5 12 -60.408 57.241 1
 0 -5 -13 64.418 63.107 1
 0 -5 -13 -33.037 62.649 1
 0 -5 -13 -53.419 58.7 4
 0 5 13 -60.069 58.35 1
 0 5 13 51.084 67.771 1
 0 -5 -14 -30.255 73.212 1
 0 -5 -14 -11.321 72.728 1
 0 -5 -14 88.789 63.254 4
 0 5 14 24.247 65.259 1
 0 5 14 11.328 68.949 1
 0 -5 -15 -38.586 70.935 1
 0 -5 -15 117.651 81.644 1
 0 -5 -15 77.427 69.073 4
 0 5 15 -135.446 64.707 1
 0 5 15 -69.687 80.178 1
 0 -5 -16 228.632 86.338 1
 0 -5 -16 197.326 91.987 1
 0 -5 -16 316.451 87.822 4
 0 5 16 175.799 81.773 1
 0 5 16 258.557 97.056 1
 0 -5 -17 61.801 91.791 1
 0 -5 -17 116.793 92.993 1
 0 -5 -17 134.221 86.676 4
 0 5 17 110.694 87.642 1
 0 5 17 260.218 103.699 1
 0 -6 20 -13.458 75.199 1
 0 -6 20 -228.483 91.012 1
 0 -6 20 -20.436 79.387 5
 0 6 -20 -223.503 89.272 1
 0 6 -20 166.306 94.729 1
 0 6 -20 -58.953 85.757 4
 0 -6 19 22.704 70.73 1
 0 -6 19 -65.251 83.694 1
 0 -6 19 234.993 77.273 5
 0 6 -19 -5.986 79.667 1
 0 6 -19 113.14 86.364 1
 0 6 -19 -42.562 78.397 4
 0 -6 18 152.022 112.322 1
 0 -6 18 -15.593 73.092 1
 0 -6 18 147.414 69.682 5
 0 6 -18 113.359 75.711 1
 0 6 -18 149.213 75.201 1
 0 6 -18 49.221 75.833 4
 0 -6 17 336.837 72.905 1
 0 -6 17 463.138 81.626 1
 0 -6 17 1169 132.7 5
 0 6 -17 565.421 81.171 1
 0 6 -17 445.586 77.924 4
 0 -6 16 1110.5 121 1
 0 -6 16 1039.8 126.2 1
 0 -6 16 1688.3 129.4 5
 0 6 -16 997.835 91.349 1
 0 6 -16 1186.6 96.1 1
 0 6 -16 870.059 82.002 4
 0 -6 15 469.996 70.079 1
 0 -6 15 429.3 72.221 1
 0 -6 15 440.158 67.558 5
 0 6 -15 368.009 67.958 1
 0 6 -15 312.05 68.357 1
 0 6 -15 285.469 65.089 4
 0 -6 14 477.264 66.534 1
 0 -6 14 455.379 72.969 1
 0 -6 14 537.911 67.638 5
 0 6 -14 619.578 75.65 1
 0 6 -14 537.623 73.448 1
 0 6 -14 496.893 60.137 4
 0 -6 13 601.31 74.297 1
 0 -6 13 466.771 67.922 1
 0 -6 13 484.334 64.826 5
 0 6 -13 578.49 70.473 1
 0 6 -13 616.136 71.38 1
 0 6 -13 581.885 80.438 4
 0 -6 12 4354.4 127.7 1
 0 -6 12 4519.5 131.8 1
 0 -6 12 4554.8 137.7 5
 0 6 -12 4104.9 170.4 1
 0 6 -12 4307.1 130.3 1
 0 6 -12 4648.2 124.9 4
 0 -6 11 392.679 58.205 1
 0 -6 11 293.292 91.116 5
 0 6 -11 451.43 62.573 1
 0 6 -11 318.03 49.746 4
 0 -6 10 98.555 50.392 1
 0 -6 10 6.375 45.856 1
 0 -6 10 -8.629 42.699 5
 0 6 -10 -34.631 46.522 1
 0 6 -10 43.508 50.414 1
 0 6 -10 -14.426 41.268 4
 0 6 -10 -19.275 43.235 5
 0 -6 9 80.131 45.685 1
 0 -6 9 196.591 50.859 1
 0 -6 9 118.04 42.392 5
 0 6 -9 160.174 47.833 1
 0 6 -9 197.592 51.178 1
 0 6 -9 144.168 44.053 4
 0 6 -9 116.643 41.101 5
 0 -6 8 281.486 50.761 1
 0 -6 8 320.066 53.588 1
 0 -6 8 214.197 44.888 4
 0 -6 8 330.756 48.405 5
 0 6 -8 271.953 50.43 1
 0 6 -8 354.994 54.038 1
 0 6 -8 205.185 44.074 4
 0 6 -8 327.029 48.208 5
 0 -6 7 29885.7 233.6 1
 0 -6 7 29418.3 231.1 1
 0 -6 7 29938.6 218.3 4
 0 -6 7 30097.3 229.3 5
 0 6 -7 29921.9 232.9 1
 0 6 -7 30305.2 234.4 1
 0 6 -7 29461.1 215 4
 0 6 -7 30023.8 229.7 5
 0 -6 6 10840.6 149.8 1
 0 -6 6 11221.2 155.9 1
 0 -6 6 11132.4 140.2 4
 0 -6 6 11328.1 146.5 5
 0 6 -6 10682.8 150.8 1
 0 6 -6 11057.7 151.5 1
 0 6 -6 11029.6 138 4
 0 6 -6 11397.3 147.9 5
 0 -6 5 3056.7 97.8 1
 0 -6 5 3107 104.4 1
 0 -6 5 2851.8 88.5 4
 0 -6 5 3037.3 92.9 5
 0 6 -5 2994.9 102.2 1
 0 6 -5 3072.9 99.7 1
 0 6 -5 2941.2 88 4
 0 6 -5 3115.8 94.2 5
 0 -6 4 5570.9 115 1
 0 -6 4 5863.4 120.6 1
 0 -6 4 5415.3 104.2 4
 0 -6 4 5738.6 106.7 5
 0 6 -4 5586.4 116.2 1
 0 6 -4 5778.6 117.8 1
 0 6 -4 5719.6 104.1 4
 0 6 -4 5540.6 107.4 5
 0 -6 3 898.922 77.596 1
 0 -6 3 926.902 82.414 1
 0 -6 3 718.823 68.91 4
 0 -6 3 841.738 65.574 5
 0 6 -3 840.983 81.093 1
 0 6 -3 766.757 78.385 1
 0 6 -3 705.173 66.248 4
 0 6 -3 801.616 69.774 5
 0 -6 2 83.106 38.59 1
 0 -6 2 14.816 40.057 1
 0 -6 2 68.402 36.295 4
 0 -6 2 101.448 31.776 5
 0 6 -2 77.012 41.628 1
 0 6 -2 34.208 40.583 1
 0 6 -2 -8.281 32.336 4
 0 6 -2 24.759 32.092 5
 0 -6 1 401.327 48.479 1
 0 -6 1 347.246 47.517 1
 0 -6 1 341.997 42.973 4
 0 -6 1 307.941 35.67 5
 0 6 -1 406.614 51.126 1
 0 6 -1 274.465 42.771 1
 0 6 -1 288.884 37.724 4
 0 6 -1 282.495 37.49 5
 0 -6 0 4622.3 105.7 1
 0 -6 0 4632.6 107.5 1
 0 -6 0 4724.7 100.9 4
 0 -6 0 4353.1 84.7 5
 0 6 0 4666.3 109.6 1
 0 6 0 4748 110.1 1
 0 6 0 4475.1 95.4 4
 0 6 0 4530.2 87.7 5
 0 -6 -1 3319.5 100.4 1
 0 -6 -1 3438.4 93.9 4
 0 -6 -1 3365.3 75.9 5
 0 6 1 3433.1 102.8 1
 0 6 1 3357.2 101.3 1
 0 6 1 3402.5 90 4
 0 6 1 3335.9 77.8 5
 0 -6 -2 -10.237 41.238 1
 0 -6 -2 6.983 41.968 1
 0 -6 -2 -6.932 36.689 4
 0 -6 -2 -0.193 25.294 5
 0 6 2 -7.526 39.205 1
 0 6 2 -0.973 43.16 1
 0 6 2 -8.871 32.967 4
 0 6 2 8.303 27.146 5
 0 -6 -3 705.017 81.358 1
 0 -6 -3 689.482 82.983 1
 0 -6 -3 618.935 52.958 4
 0 6 3 618.24 56.619 1
 0 6 3 655.562 60.57 1
 0 6 3 558.207 52.81 5
 0 -6 -4 510.81 57.185 1
 0 -6 -4 478.836 56.818 1
 0 -6 -4 438.548 51.117 4
 0 6 4 445.338 56.193 1
 0 6 4 430.044 54.805 1
 0 6 4 429.794 52.391 5
 0 -6 -5 7939.4 144.1 1
 0 -6 -5 7805.2 142.7 1
 0 -6 -5 7644.6 137.7 4
 0 6 5 7585.5 137 1
 0 6 5 7780.5 142.5 1
 0 6 5 6949.6 84.1 5
 0 -6 -6 4990.9 129.3 1
 0 -6 -6 5098.4 131 1
 0 -6 -6 5184.5 127.3 4
 0 6 6 4883.7 129.5 1
 0 6 6 4833.3 127.1 1
 0 6 6 4510.5 69.9 5
 0 -6 -7 855.151 100.175 1
 0 -6 -7 1184.9 105 1
 0 -6 -7 975.806 99.446 4
 0 6 7 999.621 117.514 1
 0 6 7 935.161 100.14 1
 0 6 7 858.633 48.568 5
 0 -6 -8 2393.2 187.2 1
 0 -6 -8 3113.2 126.4 1
 0 -6 -8 2699.9 119.8 4
 0 6 8 2809.3 120.3 1
 0 6 8 2762.9 120.1 1
 0 6 8 2476.9 51.9 5
 0 -6 -9 670.567 73.335 1
 0 -6 -9 917.611 111.984 1
 0 6 9 671.433 71.648 1
 0 6 9 1059.2 109.6 1
 0 -6 -10 260.831 67.495 1
 0 -6 -10 234.475 62.627 1
 0 -6 -10 381.721 66.997 4
 0 6 10 345.303 67.766 1
 0 6 10 230.793 65.695 1
 0 -6 -11 212.886 70.098 1
 0 -6 -11 8.716 67.764 1
 0 -6 -11 154.392 65.853 4
 0 6 11 155.4 67.616 1
 0 6 11 166.221 68.5 1
 0 -6 -12 -172.702 68.019 1
 0 -6 -12 -68.974 75.775 1
 0 -6 -12 49.103 62.906 4
 0 6 12 -71.401 66.225 1
 0 6 12 86.952 67.157 1
 0 -6 -13 502.628 80.536 1
 0 -6 -13 250.542 78.651 1
 0 -6 -13 477.346 78.071 4
 0 6 13 373.137 83.716 1
 0 6 13 469.553 86.729 1
 0 -6 -14 160.882 88.96 1
 0 -6 -14 -15.354 87.253 1
 0 -6 -14 97.972 74.939 4
 0 6 14 -56.779 76.976 1
 0 6 14 202.879 85.76 1
 0 -6 -15 36.225 83.08 1
 0 -6 -15 -53.049 80.719 4
 0 6 15 -37.23 81.176 1
 0 6 15 193.176 93.977 1
 0 -6 -16 -26.227 87.228 1
 0 -6 -16 -32.549 85.076 4
 0 6 16 -236.433 84.865 1
 0 6 16 6.371 105.534 1
 0 -7 19 1023 112.9 1
 0 -7 19 1007 113 1
 0 -7 19 948.454 104.659 5
 0 7 -19 957.536 114.665 1
 0 7 -19 1053.9 118.9 1
 0 7 -19 793.586 98.167 4
 0 -7 18 860.629 98.694 1
 0 -7 18 639.774 98.87 1
 0 -7 18 429.495 84.821 5
 0 7 -18 537.735 95.672 1
 0 7 -18 711.5 101.739 1
 0 7 -18 676.878 91.035 4
 0 -7 17 408.88 86.478 1
 0 -7 17 367.871 90.01 1
 0 -7 17 436.771 81.153 5
 0 7 -17 458.658 85.096 1
 0 7 -17 298.855 78.44 1
 0 7 -17 396.244 76.256 4
 0 -7 16 232.382 69.546 1
 0 -7 16 270.807 73.326 1
 0 -7 16 196.54 72.862 5
 0 7 -16 268.931 81.348 1
 0 7 -16 288.64 73.461 1
 0 7 -16 377.564 74.093 4
 0 -7 15 173.607 76.329 1
 0 -7 15 -47.634 66.628 1
 0 -7 15 95.77 63.982 5
 0 7 -15 58.282 69.586 1
 0 7 -15 137.417 63.218 1
 0 7 -15 50.764 61.507 4
 0 -7 14 206.208 67.621 1
 0 -7 14 216.292 73.622 1
 0 -7 14 148.158 61.617 5
 0 7 -14 360.99 77.385 1
 0 7 -14 88.155 107.472 1
 0 7 -14 257.052 63.461 4
 0 -7 13 527.682 77.166 1
 0 -7 13 584.67 77.064 1
 0 -7 13 474.637 67.936 5
 0 7 -13 577.087 75.997 1
 0 7 -13 571.2 74.885 1
 0 7 -13 615.609 68.396 4
 0 -7 12 533.271 73.365 1
 0 -7 12 524.721 77.555 1
 0 -7 12 554.922 70.833 5
 0 7 -12 478.494 68.851 1
 0 7 -12 455.256 63.487 4
 0 -7 11 86.429 57.219 1
 0 -7 11 114.043 60.53 1
 0 -7 11 75.22 54.448 5
 0 7 -11 134.401 59.861 1
 0 7 -11 144.311 60.617 1
 0 7 -11 175.876 91.695 4
 0 -7 10 226.545 57.952 1
 0 -7 10 187.604 59.14 1
 0 -7 10 140.929 54.702 5
 0 7 -10 88.589 55.391 1
 0 7 -10 125.053 58.528 1
 0 7 -10 195.237 50.391 4
 0 7 -10 115.994 52.498 5
 0 -7 9 205.473 56.112 1
 0 -7 9 243.1 65.031 1
 0 -7 9 350.819 58.436 4
 0 -7 9 286.698 75.274 5
 0 7 -9 186.866 52.449 1
 0 7 -9 307.263 59.784 1
 0 7 -9 321.248 49.264 4
 0 7 -9 155.72 56.067 5
 0 -7 8 767.235 94.843 1
 0 -7 8 896.619 99.181 1
 0 -7 8 719.704 61.132 4
 0 -7 8 816.278 94.506 5
 0 7 -8 790.799 93.896 1
 0 7 -8 458.546 63.321 1
 0 7 -8 857.4 85.749 4
 0 7 -8 761.162 94.589 5
 0 -7 7 305.943 55.185 1
 0 -7 7 301.282 57.335 1
 0 -7 7 295.691 51.904 4
 0 -7 7 261.908 49.944 5
 0 7 -7 338.552 58.088 1
 0 7 -7 342.442 58.656 1
 0 7 -7 319.772 49.659 4
 0 7 -7 257.427 50.216 5
 0 -7 6 -50.922 46.967 1
 0 -7 6 -27.103 50.006 1
 0 -7 6 20.787 41.278 4
 0 -7 6 16.024 39.828 5
 0 7 -6 -16.906 48.286 1
 0 7 -6 -95.769 45.216 1
 0 7 -6 -40.104 39.001 4
 0 7 -6 -36.024 40.79 5
 0 -7 5 2088.4 104.1 1
 0 -7 5 2220.7 111.3 1
 0 -7 5 2133.2 96 4
 0 -7 5 2194.6 97.4 5
 0 7 -5 2078.1 107.7 1
 0 7 -5 2227.9 108.7 1
 0 7 -5 2181.5 90.8 4
 0 7 -5 2275.6 100.1 5
 0 -7 4 2316.7 105.3 1
 0 -7 4 2516.9 113.3 1
 0 -7 4 2141.8 95.3 4
 0 -7 4 2334.5 94 5
 0 7 -4 2313.5 106.8 1
 0 7 -4 2486.7 108.5 1
 0 7 -4 2139.7 90.4 4
 0 7 -4 2141.5 93.3 5
 0 -7 3 151.319 49.686 1
 0 -7 3 107.015 52.817 1
 0 -7 3 116.122 44.603 4
 0 -7 3 50.877 39.171 5
 0 7 -3 242.023 52.108 1
 0 7 -3 75.749 49.477 1
 0 7 -3 39.901 39.59 4
 0 7 -3 103.513 41.689 5
 0 -7 2 1027.8 94 1
 0 -7 2 917.164 94.793 1
 0 -7 2 835.814 88.062 4
 0 -7 2 893.455 76.914 5
 0 7 -2 823.308 95.927 1
 0 7 -2 890.485 90.929 1
 0 7 -2 749.5 75.885 4
 0 7 -2 891.228 80.123 5
 0 -7 1 9.667 48.019 1
 0 -7 1 -21.704 44.662 1
 0 -7 1 -5.753 41.795 4
 0 -7 1 -5.242 33.184 5
 0 7 -1 -16.131 46.683 1
 0 7 -1 31.292 48.618 1
 0 7 -1 -20.248 37.529 4
 0 7 -1 11.965 37.229 5
 0 -7 0 9412.5 154.8 1
 0 -7 0 9893.9 160.5 1
 0 -7 0 9129.4 142.9 4
 0 -7 0 9132.7 122.7 5
 0 7 0 9587.4 158.6 1
 0 7 0 9483.2 159.7 1
 0 7 0 9080.5 137.1 4
 0 7 0 9325.5 126.2 5
 0 -7 -1 1.913 49.416 1
 0 -7 -1 1.637 46.367 1
 0 -7 -1 -14.211 43.219 4
 0 -7 -1 6.32 31.362 5
 0 7 1 64.969 51.712 1
 0 7 1 23.215 50.767 1
 0 7 1 -9.395 40.19 4
 0 7 1 45.929 34.934 5
 0 -7 -2 209.153 57.967 1
 0 -7 -2 155.765 52.409 1
 0 -7 -2 166.4 49.34 4
 0 -7 -2 253.606 37.222 5
 0 7 2 273.154 57.823 1
 0 7 2 234.602 56.404 1
 0 7 2 260.821 47.256 4
 0 7 2 275.578 39.183 5
 0 -7 -3 114.937 53.551 1
 0 -7 -3 113.556 55.946 1
 0 -7 -3 50.134 48.219 4
 0 7 3 14.633 53.348 1
 0 7 3 67.733 51.472 1
 0 7 3 81.525 33.753 5
 0 -7 -4 -1.842 54.304 1
 0 -7 -4 92.692 56.206 1
 0 -7 -4 23.559 48.46 4
 0 7 4 30.247 51.867 1
 0 7 4 -16.945 54.684 1
 0 7 4 -23.472 30.737 5
 0 -7 -5 417.151 82.066 1
 0 -7 -5 515.585 71.82 1
 0 -7 -5 358.691 60.29 4
 0 7 5 465.82 66.304 1
 0 7 5 402.566 65.7 1
 0 7 5 343.25 36.4 5
 0 -7 -6 3554.7 137.3 1
 0 -7 -6 3476.1 134.4 1
 0 -7 -6 3369.8 129.3 4
 0 7 6 3610.2 128.2 1
 0 7 6 3294.3 130.9 1
 0 7 6 3078.3 72.5 5
 0 -7 -7 386.29 67.022 1
 0 -7 -7 352.394 68.794 1
 0 -7 -7 447.516 78.969 4
 0 7 7 559.841 72.987 1
 0 7 7 391.382 69.905 1
 0 7 7 353.611 34.09 5
 0 -7 -8 1489.2 127.8 1
 0 -7 -8 1364.2 127.7 1
 0 -7 -8 1396.7 121.5 4
 0 7 8 1340 120 1
 0 7 8 1178.6 125.8 1
 0 -7 -9 85.025 72.697 1
 0 -7 -9 198.638 72.179 1
 0 -7 -9 360.982 66.453 4
 0 7 9 136.801 72.162 1
 0 7 9 155.289 71.373 1
 0 -7 -10 251.402 75.521 1
 0 -7 -10 169.412 72.6 1
 0 -7 -10 400.566 70.184 4
 0 7 10 356.156 73.298 1
 0 7 10 298.542 76.639 1
 0 -7 -11 502.03 86.179 1
 0 -7 -11 447.758 86.369 1
 0 -7 -11 471.699 79.87 4
 0 7 11 399.33 81.37 1
 0 7 11 550.659 85.35 1
 0 -7 -12 186.419 84.441 1
 0 -7 -12 50.743 94.772 1
 0 -7 -12 -79.033 71.723 4
 0 7 12 63.672 81.449 1
 0 7 12 60.689 78.212 1
 0 -7 -13 -149.927 77.747 1
 0 -7 -13 282.832 89.619 1
 0 -7 -13 -169.324 77.1 4
 0 7 13 22.428 77.474 1
 0 7 13 10.475 88.086 1
 0 -7 -14 696.411 116.137 1
 0 -7 -14 1040.5 119 1
 0 -7 -14 711.839 105.995 4
 0 7 14 561.026 99.024 1
 0 7 14 842.436 176.859 1
 0 -8 17 -81.223 84.739 1
 0 -8 17 173.513 94.274 1
 0 -8 17 27.182 77.644 5
 0 8 -17 247.742 87.761 1
 0 8 -17 90.768 88.99 1
 0 8 -17 -28.061 75.076 4
 0 -8 16 153.411 80.867 1
 0 -8 16 42.614 85.683 1
 0 -8 16 250.035 82.865 5
 0 8 -16 172.487 79.669 1
 0 8 -16 153.611 83.691 1
 0 8 -16 41.615 68.298 4
 0 -8 15 151.866 80.287 1
 0 -8 15 82.952 84.367 1
 0 -8 15 255.334 77.08 5
 0 8 -15 128.816 74.859 1
 0 8 -15 167.419 81.177 1
 0 8 -15 82.727 64.842 4
 0 -8 14 510.959 78.964 1
 0 -8 14 869.52 96.092 1
 0 -8 14 593.671 83.723 5
 0 8 -14 572.272 85.622 1
 0 8 -14 442.111 86.607 1
 0 8 -14 587.436 78.901 4
 0 -8 13 52.749 70.185 1
 0 -8 13 5.659 76.526 1
 0 -8 13 73.113 63.135 5
 0 8 -13 32.541 65.78 1
 0 8 -13 108.536 58.416 4
 0 -8 12 -104.916 61.741 1
 0 -8 12 -10.808 67.004 1
 0 -8 12 8.553 56.101 5
 0 8 -12 50.758 65.223 1
 0 8 -12 44.858 64.111 1
 0 8 -12 25.386 58.146 4
 0 -8 11 102.9 71.888 1
 0 -8 11 1.28 65.666 1
 0 -8 11 129.191 59.845 5
 0 8 -11 216.795 69.502 1
 0 8 -11 226.457 70.335 1
 0 8 -11 197.884 60.167 4
 0 -8 10 440.393 76.241 1
 0 -8 10 594.24 69.667 5
 0 8 -10 591.682 75.474 1
 0 8 -10 566.55 77.627 1
 0 8 -10 555.702 62.49 4
 0 -8 9 103.006 66.528 1
 0 -8 9 108.543 60.794 1
 0 -8 9 138.976 92.122 4
 0 -8 9 81.303 52.481 5
 0 8 -9 65.627 62.224 1
 0 8 -9 177.053 63.139 1
 0 8 -9 100.509 50.699 4
 0 8 -9 117.692 52.731 5
 0 -8 8 10.076 57.636 1
 0 -8 8 15.149 57.096 1
 0 -8 8 46.639 52.985 4
 0 -8 8 89.06 51.592 5
 0 8 -8 72.136 57.32 1
 0 8 -8 56.04 61.368 1
 0 8 -8 69.608 77.786 4
 0 8 -8 46.572 51.847 5
 0 -8 7 372.451 64.021 1
 0 -8 7 409.515 68.588 1
 0 -8 7 314.082 57.821 4
 0 -8 7 247.654 54.758 5
 0 8 -7 400.044 84.1 1
 0 8 -7 448.694 69.71 1
 0 8 -7 302.947 53.487 4
 0 8 -7 207.203 65.755 5
 0 -8 6 15.206 56.032 1
 0 -8 6 71.689 59.029 1
 0 -8 6 -51.449 47.358 4
 0 -8 6 61.474 56.797 5
 0 8 -6 12.414 70.195 1
 0 8 -6 66.235 103.208 1
 0 8 -6 17.307 45.806 4
 0 8 -6 -45.046 44.915 5
 0 -8 5 163.272 58.966 1
 0 -8 5 265.933 64.205 1
 0 -8 5 121.053 51.539 4
 0 -8 5 151.408 49.97 5
 0 8 -5 57.054 73.766 1
 0 8 -5 217.085 63.767 1
 0 8 -5 234.47 50.953 4
 0 8 -5 141.954 50.087 5
 0 -8 4 25.956 56.336 1
 0 -8 4 36.294 48.464 4
 0 -8 4 95.481 45.34 5
 0 8 -4 46.182 70.667 1
 0 8 -4 40.737 51.168 1
 0 8 -4 -65.524 43.049 4
 0 8 -4 84.844 46.126 5
 0 -8 3 64.076 54.298 1
 0 -8 3 3.169 59.559 1
 0 -8 3 58.966 48.06 4
 0 -8 3 105.035 43.925 5
 0 8 -3 38.822 59.564 1
 0 8 -3 32.784 55.499 1
 0 8 -3 -13.61 43.544 4
 0 8 -3 59.473 45.203 5
 0 -8 2 362.597 73.39 1
 0 -8 2 434.234 66.489 1
 0 -8 2 387.274 59.358 4
 0 -8 2 398.925 49.878 5
 0 8 -2 458.273 68.698 1
 0 8 -2 325.925 68.65 1
 0 8 -2 368.704 53.891 4
 0 8 -2 303.946 50.936 5
 0 -8 1 356.806 65.848 1
 0 -8 1 406.974 61.284 4
 0 -8 1 325.914 48.435 5
 0 8 -1 474.568 67.933 1
 0 8 -1 336.536 63.223 1
 0 8 -1 260.497 53.419 4
 0 8 -1 285.404 49.317 5
 0 -8 0 727.644 75.784 1
 0 -8 0 1123.9 117.5 1
 0 -8 0 891.439 106.792 4
 0 -8 0 957.845 80.863 5
 0 8 0 822.654 78.827 1
 0 8 0 979.418 114.808 1
 0 8 0 868.821 91.995 4
 0 8 0 756.232 82.949 5
 0 -8 -1 846.249 78.513 1
 0 -8 -1 774.982 78.508 1
 0 -8 -1 728.832 68.072 4
 0 -8 -1 825.315 77.877 5
 0 8 1 901.663 84.231 1
 0 8 1 857.993 85.014 1
 0 8 1 873.525 91.952 4
 0 8 1 879.108 82.64 5
 0 -8 -2 3314 139.4 1
 0 -8 -2 3263.3 139.4 1
 0 -8 -2 3059.3 125.5 4
 0 8 2 3267 138.8 1
 0 8 2 3295 141.7 1
 0 8 2 2976.4 94.1 5
 0 -8 -3 383.642 71.863 1
 0 -8 -3 422.357 73.458 1
 0 -8 -3 349.282 76.665 4
 0 8 3 419.763 70.959 1
 0 8 3 468.514 77.299 1
 0 8 3 426.239 45.089 5
 0 -8 -4 -12.365 64.667 1
 0 -8 -4 74.688 65.991 1
 0 8 4 -30.14 57.563 1
 0 8 4 -99.359 61.765 1
 0 8 4 -1.939 35.021 5
 0 -8 -5 443.251 77.743 1
 0 -8 -5 391.389 74.61 1
 0 -8 -5 415.208 67.902 4
 0 8 5 362.03 69.609 1
 0 8 5 464.424 78.259 1
 0 8 5 330.743 40.959 5
 0 -8 -6 115.558 71.006 1
 0 -8 -6 88.293 71.319 1
 0 -8 -6 60.701 62.377 4
 0 8 6 103.637 65.299 1
 0 8 6 57.152 70.12 1
 0 8 6 -1.671 34.739 5
 0 -8 -7 371.821 81.74 1
 0 -8 -7 117.841 121.05 1
 0 -8 -7 416.272 72.159 4
 0 8 7 265.116 69.367 1
 0 8 7 421.579 76.592 1
 0 8 7 283.397 36.045 5
 0 -8 -8 119.871 78.539 1
 0 -8 -8 41.913 95.511 1
 0 -8 -8 187.031 73.644 4
 0 8 8 89.313 68.712 1
 0 8 8 214.285 78.331 1
 0 -8 -9 649.767 92.494 1
 0 -8 -9 950.593 105.829 1
 0 -8 -9 751.518 89.044 4
 0 8 9 627.629 84.039 1
 0 8 9 771.691 114.012 1
 0 -8 -10 376.681 95.302 1
 0 -8 -10 137.727 81.813 1
 0 -8 -10 152.455 77.339 4
 0 8 10 171.786 76.349 1
 0 8 10 48.644 95.559 1
 0 -8 -11 -47.528 88.808 1
 0 -8 -11 1.089 85.692 1
 0 -8 -11 40.196 78.361 4
 0 8 11 -19.754 80.031 1
 0 8 11 -168.432 80.797 1
 0 -8 -12 382.082 106.538 1
 0 -8 -12 242.087 98.206 1
 0 -8 -12 391.961 88.749 4
 0 8 12 327.638 97.898 1
 0 8 12 172.828 99.406 1
 0 -9 15 733.045 102.204 1
 0 -9 15 862.031 112.267 1
 0 -9 15 642.89 90.088 5
 0 9 -15 804.001 100.716 1
 0 9 -15 682.051 95.631 1
 0 9 -15 811.206 90.755 4
 0 -9 14 -15.994 81.627 1
 0 -9 14 63.757 92.978 1
 0 -9 14 66.296 75.471 5
 0 9 -14 51.023 85.709 1
 0 9 -14 114.982 82.208 1
 0 9 -14 -36.123 68.243 4
 0 -9 13 130.244 77.779 1
 0 -9 13 19.14 83.883 1
 0 -9 13 31.744 69.683 5
 0 9 -13 132.812 77.384 1
 0 9 -13 62.649 68.202 4
 0 -9 12 177.71 80.816 1
 0 -9 12 129.326 87.955 1
 0 -9 12 223.132 67.392 5
 0 9 -12 301.75 82.269 1
 0 9 -12 111.877 76.618 1
 0 9 -12 136.97 66.311 4
 0 -9 11 138.747 72.029 1
 0 -9 11 88.551 78.371 1
 0 -9 11 -13.733 62.889 5
 0 9 -11 39.841 74.981 1
 0 9 -11 -9.974 76.681 1
 0 9 -11 89.695 63.886 4
 0 -9 10 7.904 72.595 1
 0 -9 10 -7.254 63.167 4
 0 -9 10 44.559 63.445 5
 0 9 -10 -79.224 65.389 1
 0 9 -10 27.209 69.284 1
 0 9 -10 57.633 56.9 4
 0 -9 9 10.148 63.963 1
 0 -9 9 109.12 72.637 1
 0 -9 9 -7.237 56.59 4
 0 -9 9 -63.915 56.677 5
 0 9 -9 -87.891 63.765 1
 0 9 -9 -45.5 70.804 1
 0 9 -9 42.032 58.61 4
 0 -9 8 118.648 72.254 1
 0 -9 8 213.772 78.224 1
 0 -9 8 133.471 61.78 4
 0 -9 8 187.425 65 5
 0 9 -8 311.336 73.814 1
 0 9 -8 273.152 76.348 1
 0 9 -8 213.901 59.761 4
 0 -9 7 307.518 73.367 1
 0 -9 7 221.452 72.015 1
 0 -9 7 193.522 62.818 4
 0 -9 7 58.901 59.583 5
 0 9 -7 280.436 72.46 1
 0 9 -7 244.114 72.32 1
 0 9 -7 228.266 56.963 4
 0 9 -7 87.664 54.571 5
 0 -9 6 573.083 81.694 1
 0 -9 6 377.732 78.788 1
 0 -9 6 470.348 64.997 4
 0 -9 6 453.483 66.068 5
 0 9 -6 436.634 76.626 1
 0 9 -6 480.497 86.461 1
 0 9 -6 501.612 65.65 4
 0 9 -6 369.334 61.253 5
 0 -9 5 1383.8 134.7 1
 0 -9 5 935.164 91.737 1
 0 -9 5 1158.6 113 4
 0 -9 5 1504.6 115.9 5
 0 9 -5 1076.4 92.3 1
 0 9 -5 1272.7 130.2 1
 0 9 -5 1323.2 106.9 4
 0 9 -5 1240.6 116.1 5
 0 -9 4 391.588 80.623 1
 0 -9 4 297.961 73.192 1
 0 -9 4 279.717 64.896 4
 0 -9 4 266.937 55.299 5
 0 9 -4 319.821 73.327 1
 0 9 -4 202.076 73.89 1
 0 9 -4 176.27 51.497 4
 0 9 -4 321.856 96.098 5
 0 -9 3 44.6 66.771 1
 0 -9 3 -21.009 70.657 1
 0 -9 3 -29.901 54.236 4
 0 -9 3 2.853 49.55 5
 0 9 -3 -150.709 60.393 1
 0 9 -3 -10.763 64.408 1
 0 9 -3 -36.069 47.536 4
 0 9 -3 -19.708 48.3 5
 0 -9 2 25.585 66.079 1
 0 -9 2 93.625 69.185 1
 0 -9 2 156.979 57.063 4
 0 -9 2 82.602 49.124 5
 0 9 -2 210.228 67.041 1
 0 9 -2 233.256 73.141 1
 0 9 -2 15.509 51.145 4
 0 9 -2 111.953 51.388 5
 0 -9 1 142.574 67.717 1
 0 -9 1 115.723 71.205 1
 0 -9 1 215.128 63.904 4
 0 -9 1 101.682 48.174 5
 0 9 -1 90.425 70.459 1
 0 9 -1 69.663 70.889 1
 0 9 -1 34.27 51.12 4
 0 9 -1 52.902 47.857 5
 0 -9 0 -64.336 64.56 1
 0 -9 0 -38.353 66.871 1
 0 -9 0 60.458 59.743 4
 0 -9 0 -51.677 42.65 5
 0 9 0 -67.458 66.338 1
 0 9 0 -38.115 67.214 1
 0 9 0 52.89 51.038 4
 0 9 0 40.155 45.459 5
 0 -9 -1 -135.441 68.903 1
 0 -9 -1 72.088 68.9 1
 0 -9 -1 -64.581 58.871 4
 0 -9 -1 -42.434 42.21 5
 0 9 1 -148.342 67.736 1
 0 9 1 -76.292 71.092 1
 0 9 1 -32.151 43.044 5
 0 -9 -2 -4.849 69.805 1
 0 -9 -2 -37.865 72.285 1
 0 -9 -2 -25.178 61.488 4
 0 9 2 58.514 73.564 1
 0 9 2 14.215 73.138 1
 0 9 2 12.474 43.838 5
 0 -9 -3 31.245 75.35 1
 0 -9 -3 -52.876 73.529 1
 0 -9 -3 -110.246 61.783 4
 0 9 3 -82.645 69.468 1
 0 9 3 -33.8 76.134 1
 0 9 3 -9.267 42.486 5
 0 -9 -4 443.062 86.575 1
 0 -9 -4 341.216 86.036 1
 0 -9 -4 513.065 75.2 4
 0 9 4 458.981 85.537 1
 0 9 4 177.271 84.202 1
 0 9 4 351.842 48.125 5
 0 -9 -5 36.736 78.489 1
 0 -9 -5 9.36 77.776 1
 0 -9 -5 -149.812 65.41 4
 0 9 5 -84.859 70.555 1
 0 9 5 -192.981 78.418 1
 0 9 5 -70.348 37.783 5
 0 -9 -6 155.15 81.863 1
 0 -9 -6 -60.199 83.02 1
 0 -9 -6 -110.593 67.37 4
 0 9 6 -57.201 75.545 1
 0 9 6 -25.706 79.974 1
 0 -9 -7 91.697 87.751 1
 0 -9 -7 213.369 92.461 1
 0 -9 -7 39.235 73.45 4
 0 9 7 121.653 80.372 1
 0 9 7 354.912 89.504 1
 0 -9 -8 824.292 110.341 1
 0 -9 -8 1072.7 113.3 1
 0 -9 -8 873.937 98.528 4
 0 9 8 922.91 99.381 1
 0 9 8 862.961 107.936 1
 0 -9 -9 271.329 95.204 1
 0 -9 -9 683.589 107.682 1
 0 -9 -9 565.395 101.198 4
 0 9 9 318.265 90.28 1
 0 9 9 392.12 104.308 1
 0 -10 12 16.325 89.862 1
 0 -10 12 -164.296 80.791 1
 0 -10 12 -8.12 79.237 5
 0 10 -12 -184.237 86.868 1
 0 10 -12 -15.307 91.467 1
 0 10 -12 133.54 74.376 4
 0 -10 11 -68.552 83.941 1
 0 -10 11 -75.655 88.111 1
 0 -10 11 -136.978 73.496 5
 0 10 -11 -104.656 88.109 1
 0 10 -11 120.591 94.031 1
 0 10 -11 46.724 69.957 4
 0 -10 10 650.788 93.009 1
 0 -10 10 355.246 81.048 1
 0 -10 10 652.796 89.343 4
 0 -10 10 615.081 92.153 5
 0 10 -10 595.253 106.648 1
 0 10 -10 794.246 109.855 1
 0 10 -10 474.584 78.292 4
 0 -10 9 823.878 101.987 1
 0 -10 9 728.104 103.826 1
 0 -10 9 605.575 83.038 4
 0 -10 9 512.78 84.737 5
 0 10 -9 591.527 95.772 1
 0 10 -9 769.689 93.738 1
 0 10 -9 428.752 75.292 4
 0 -10 8 188.84 87.958 1
 0 -10 8 256.124 76.854 1
 0 -10 8 25.491 71.927 4
 0 -10 8 112.26 69.812 5
 0 10 -8 244.806 83.057 1
 0 10 -8 91.251 70.451 1
 0 10 -8 126.749 65.76 4
 0 -10 7 2319 164.8 1
 0 -10 7 2470 167 1
 0 -10 7 2174.1 144.7 4
 0 -10 7 2136.6 155 5
 0 10 -7 2580.5 167.2 1
 0 10 -7 2199.7 157.4 1
 0 10 -7 2173 135.3 4
 0 -10 6 851.254 104.215 1
 0 -10 6 644.942 93.484 1
 0 -10 6 663.673 79.476 4
 0 -10 6 656.034 79.146 5
 0 10 -6 733.31 96.209 1
 0 10 -6 779.039 104.904 1
 0 10 -6 460.538 71.447 4
 0 -10 5 288.447 81.685 1
 0 -10 5 370.16 88.103 1
 0 -10 5 324.488 70.46 4
 0 -10 5 365.334 67.613 5
 0 10 -5 317.754 88.716 1
 0 10 -5 265.603 79.885 1
 0 10 -5 289.093 66.298 4
 0 10 -5 454.574 69.443 5
 0 -10 4 495.127 88.347 1
 0 -10 4 260.78 89.506 1
 0 -10 4 312.132 72.619 4
 0 -10 4 409.623 67.123 5
 0 10 -4 330.032 86.75 1
 0 10 -4 519.735 88.988 1
 0 10 -4 273.026 67.658 4
 0 10 -4 432.371 67.097 5
 0 -10 3 35.44 76.921 1
 0 -10 3 230.674 86.63 1
 0 -10 3 72.968 69.481 4
 0 -10 3 29.897 56.551 5
 0 10 -3 127.563 80.006 1
 0 10 -3 289.99 83.906 1
 0 10 -3 -40.057 64.047 4
 0 10 -3 182.145 58.355 5
 0 -10 2 97.902 81.918 1
 0 -10 2 221.913 89.43 1
 0 -10 2 20.158 64.664 4
 0 -10 2 250.539 61.835 5
 0 10 -2 123.367 77.897 1
 0 10 -2 153.938 78.103 1
 0 10 -2 64.468 63.753 4
 0 10 -2 67.751 55.531 5
 0 -10 1 508.672 91.732 1
 0 -10 1 494.791 98.891 1
 0 -10 1 535.323 78.562 4
 0 -10 1 540.33 68.769 5
 0 10 -1 667.298 97.16 1
 0 10 -1 669.135 103.86 1
 0 10 -1 405.076 69.122 4
 0 10 -1 327.403 97.889 5
 0 -10 0 -47.625 80.554 1
 0 -10 0 14.191 84.292 1
 0 -10 0 53.87 69.166 4
 0 -10 0 67.04 54.652 5
 0 10 0 29.599 82.196 1
 0 10 0 14.84 87.532 1
 0 10 0 69.889 61.551 4
 0 10 0 -69.944 52.536 5
 0 -10 -1 -3.918 85.697 1
 0 -10 -1 100.088 87.927 1
 0 -10 -1 71.681 70.677 4
 0 10 1 85.673 77.654 1
 0 10 1 102.718 88.607 1
 0 10 1 73.847 53.506 5
 0 -10 -2 59.104 86.267 1
 0 -10 -2 84.024 84.793 1
 0 -10 -2 -30.399 75.164 4
 0 10 2 -106.887 91.055 1
 0 10 2 23.217 48.552 5
 0 -10 -3 -72.299 89.24 1
 0 -10 -3 107.068 90.071 1
 0 -10 -3 60.08 79.617 4
 0 10 3 1.889 89.329 1
 0 10 3 -48.673 87.091 1
 0 -10 -4 231.58 93.895 1
 0 -10 -4 310.661 103.247 1
 0 -10 -4 246.985 82.405 4
 0 10 4 172.152 100.315 1
 0 10 4 376.812 104.288 1
 0 -10 -5 -136.486 94.746 1
 0 -10 -5 45.616 96.579 1
 0 -10 -5 -29.01 85.224 4
 0 10 5 -180.804 89.283 1
 0 10 5 88.099 110.867 1
 0 -10 -6 385.643 109.667 1
 0 -10 -6 55.77 97.287 1
 0 -10 -6 -10.138 87.195 4
 0 10 6 149.76 97.623 1
 0 10 6 -1.557 101.981 1
 0 -11 5 456.857 107.672 1
 0 -11 5 212.717 103.466 1
 0 -11 5 163.052 78.479 4
 0 -11 5 124.401 76.068 5
 0 11 -5 588.121 113.783 1
 0 11 -5 179.429 77.085 4
 0 -11 4 42.269 101.708 1
 0 -11 4 -10.769 91.944 1
 0 -11 4 -62.209 76.537 4
 0 -11 4 47.686 71.578 5
 0 11 -4 -106.81 92.253 1
 0 11 -4 398.025 107.754 1
 0 11 -4 -24.041 69.895 4
 0 -11 3 325.452 102.889 1
 0 -11 3 40.006 103.011 1
 0 -11 3 -137.431 75.679 4
 0 -11 3 188.075 71.787 5
 0 11 -3 219.612 98.517 1
 0 11 -3 145.855 104.828 1
 0 11 -3 -15.926 74.476 4
 0 -11 2 356.387 101.256 1
 0 -11 2 -107.565 78.19 4
 0 -11 2 69.212 72.304 5
 0 11 -2 225.307 108.576 1
 0 11 -2 183.479 75.842 4
 -1 11 1 317.682 105.897 1
 -1 11 1 8.349 64.122 5
 1 -11 -1 228.359 103.375 1
 1 -11 -1 237.046 86.295 4
 -1 11 0 -67.416 94.158 1
 -1 11 0 0.04851 104.253 1
 1 -11 0 71.382 87.652 1
 1 -11 0 -162.546 94.116 1
 1 -11 0 183.258 77.933 4
 -1 11 -1 129.449 97.97 1
 -1 11 -1 154.097 102.423 1
 -1 11 -1 -178.786 63.301 5
 1 -11 1 235.231 95.371 1
 1 -11 1 60.118 97.06 1
 1 -11 1 193.989 75.025 4
 -1 11 -2 191.39 99.637 1
 -1 11 -2 -51.559 97.737 1
 -1 11 -2 -13.135 64.139 4
 1 -11 2 57.108 102.261 1
 1 -11 2 -245.39 92.594 1
 1 -11 2 -29.644 67.378 4
 1 -11 2 139.581 70.125 5
 -1 11 -3 90.664 99.792 1
 -1 11 -3 -9.5 102.005 1
 -1 11 -3 -14.832 64.978 4
 -1 11 -3 121.932 69.112 5
 1 -11 3 58.67 87.876 1
 1 -11 3 230.445 101.57 1
 1 -11 3 57.708 72.043 4
 1 -11 3 -13.944 70.771 5
 -1 11 -4 1773 189.9 1
 -1 11 -4 1440.2 133.7 1
 -1 11 -4 1414.3 137 4
 -1 11 -4 1351.7 145.1 5
 1 -11 4 1903.7 190.8 1
 1 -11 4 1389.7 128.8 1
 1 -11 4 1949.6 138.7 4
 1 -11 4 1941 155.8 5
 -1 11 -5 250.945 99.13 1
 -1 11 -5 508.312 101.507 1
 -1 11 -5 168.024 73.417 4
 -1 11 -5 418.124 77.623 5
 1 -11 5 454.373 101.588 1
 1 -11 5 270.74 100.977 1
 1 -11 5 438.972 74.876 4
 1 -11 5 434.914 82.88 5
 -1 11 -6 326.432 97.552 1
 -1 11 -6 577.288 103.88 1
 -1 11 -6 175.931 72.774 4
 -1 11 -6 488.461 80.159 5
 1 -11 6 354.181 98.428 1
 1 -11 6 377.123 102.015 1
 1 -11 6 252.901 76.623 4
 1 -11 6 364.567 79.121 5
 -1 11 -7 414.982 98.975 1
 -1 11 -7 498.447 107.968 1
 -1 11 -7 365.647 73.416 4
 -1 11 -7 282.615 80.373 5
 1 -11 7 362.402 109.134 1
 1 -11 7 179.99 97.007 1
 1 -11 7 331.127 82.695 4
 1 -11 7 105.076 81.205 5
 -1 10 7 -25.927 98.615 1
 1 -10 -7 -261.958 97.395 1
 1 -10 -7 -45.414 99.751 1
 -1 10 6 1.15 89.594 1
 -1 10 6 239.521 98.314 1
 -1 10 6 74.788 54.568 5
 1 -10 -6 -85.275 90.827 1
 1 -10 -6 166.397 98.634 1
 1 -10 -6 23.622 80.551 4
 -1 10 5 116.496 85.843 1
 -1 10 5 48.701 95.612 1
 -1 10 5 53.111 50.535 5
 1 -10 -5 105.085 97.284 1
 1 -10 -5 52.045 90.92 1
 1 -10 -5 -27.291 71.246 4
 -1 10 4 172.302 85.237 1
 -1 10 4 -48.513 89.957 1
 -1 10 4 67.005 51.739 5
 1 -10 -4 39.588 90.902 1
 1 -10 -4 -62.911 88.427 1
 1 -10 -4 -164.817 62.885 4
 -1 10 3 79.26 80.935 1
 -1 10 3 -21.678 86.661 1
 -1 10 3 -11.603 51.495 5
 1 -10 -3 119.509 94.474 1
 1 -10 -3 -1.498 85.2 1
 1 -10 -3 70.546 65.393 4
 -1 10 2 -62.259 80.739 1
 -1 10 2 10.766 82.276 1
 -1 10 2 -39.209 49.417 2
 -1 10 2 45.444 53.337 5
 1 -10 -2 -152.548 81.466 1
 1 -10 -2 -89.191 78.79 1
 1 -10 -2 -80.567 61.971 4
 -1 10 1 122.43 81.834 1
 -1 10 1 -73.069 82.806 1
 -1 10 1 75.341 96.671 5
 1 -10 -1 -28.346 71.236 1
 1 -10 -1 181.459 82.201 1
 1 -10 -1 220.155 66.886 4
 -1 10 0 194.772 74.635 1
 -1 10 0 82.763 86.417 1
 -1 10 0 64.75 57.686 5
 1 -10 0 64.751 84.204 1
 1 -10 0 -138.984 76.709 1
 1 -10 0 94.653 64.387 4
 -1 10 -1 161.24 78.876 1
 -1 10 -1 27.467 82.088 1
 -1 10 -1 -5.72 52.662 4
 -1 10 -1 -36.867 56.403 5
 1 -10 1 -42.705 79.984 1
 1 -10 1 -84.851 72.676 1
 1 -10 1 62.482 60.235 4
 1 -10 1 114.539 57.227 5
 -1 10 -2 0.771 80.092 1
 -1 10 -2 30.744 79.191 1
 -1 10 -2 52.005 53.249 4
 -1 10 -2 -23.773 55.942 5
 1 -10 2 42.941 81.398 1
 1 -10 2 141.435 81.257 1
 1 -10 2 -57.302 57.459 4
 1 -10 2 -24.25 55.07 5
 -1 10 -3 218.686 83.398 1
 -1 10 -3 286.661 81.831 1
 -1 10 -3 45.152 53.59 4
 -1 10 -3 160.186 63.865 5
 1 -10 3 120.702 81.505 1
 1 -10 3 -37.618 77.256 1
 1 -10 3 195.075 63.127 4
 1 -10 3 149.932 59.869 5
 -1 10 -4 -14.833 78.565 1
 -1 10 -4 97.505 80.899 1
 -1 10 -4 -17.694 52.466 4
 -1 10 -4 -154.288 53.942 5
 1 -10 4 22.909 76.714 1
 1 -10 4 28.014 75.444 1
 1 -10 4 47.544 56.138 4
 1 -10 4 63.344 59.624 5
 -1 10 -5 742.555 95.541 1
 -1 10 -5 658.134 97.185 1
 -1 10 -5 453.413 66.268 4
 -1 10 -5 359.443 75.708 5
 1 -10 5 458.632 83.128 1
 1 -10 5 449.063 91.295 1
 1 -10 5 554.4 68.169 4
 1 -10 5 377.606 67.658 5
 -1 10 -6 888.722 93.894 1
 -1 10 -6 1171.1 143.1 1
 -1 10 -6 1009.7 107.7 4
 -1 10 -6 734.475 81.278 5
 1 -10 6 1122.1 110.3 1
 1 -10 6 1100.1 101.6 1
 1 -10 6 1386 120.1 4
 1 -10 6 766.403 80.903 5
 -1 10 -7 814.416 104.555 1
 -1 10 -7 611.166 100.3 1
 -1 10 -7 603.001 70.047 4
 -1 10 -7 668.21 80.902 5
 1 -10 7 716.849 95.629 1
 1 -10 7 857.22 101.244 1
 1 -10 7 734.066 76.421 4
 1 -10 7 625.719 80.002 5
 -1 10 -8 582.151 92.093 1
 -1 10 -8 681.905 98.668 1
 -1 10 -8 467.346 69.213 4
 -1 10 -8 542.884 78.153 5
 1 -10 8 714.013 95.857 1
 1 -10 8 727.536 98.762 1
 1 -10 8 526.668 76.49 4
 1 -10 8 336.36 74.07 5
 -1 10 -9 -36.939 74.04 1
 -1 10 -9 -28.827 76.243 1
 -1 10 -9 -57.418 59.426 4
 -1 10 -9 -115.722 62.997 5
 1 -10 9 77.8 79.558 1
 1 -10 9 125.228 86.169 1
 1 -10 9 -67.15 68.739 5
 -1 10 -10 -32.759 78.551 1
 -1 10 -10 132.256 70.805 1
 -1 10 -10 36.233 63.917 4
 -1 10 -10 -25.064 70.931 5
 1 -10 10 234.288 84.888 1
 1 -10 10 -18.993 84.313 1
 1 -10 10 -28.209 70.059 5
 -1 10 -11 -74.196 86.174 1
 -1 10 -11 186.943 83.88 1
 -1 10 -11 -24.618 64.314 4
 -1 10 -11 33.845 74.021 5
 1 -10 11 177.675 84.82 1
 1 -10 11 -147.683 82.582 1
 1 -10 11 158.323 80.353 5
 -1 10 -12 -37.184 85.771 1
 -1 10 -12 171.674 93.609 1
 -1 10 -12 58.541 65.557 4
 -1 10 -12 225.019 75.017 5
 1 -10 12 30.766 83.444 1
 1 -10 12 -65.802 89.84 1
 1 -10 12 165.306 85.754 5
 -1 9 10 -173.993 86.611 1
 -1 9 10 -123.012 99.107 1
 -1 9 10 74.316 41.872 5
 1 -9 -10 46.023 101.756 1
 1 -9 -10 66.197 98.553 1
 1 -9 -10 62.333 84.503 4
 -1 9 9 581.462 103.366 1
 -1 9 9 458.874 108.224 1
 -1 9 9 358.95 48.067 5
 1 -9 -9 424.406 99.816 1
 1 -9 -9 516.768 106.873 1
 1 -9 -9 586.344 88.393 4
 -1 9 8 -31.729 82.348 1
 -1 9 8 17.031 88.417 1
 -1 9 8 -39.479 42.583 5
 1 -9 -8 32.284 92.533 1
 1 -9 -8 -149.296 81.535 1
 1 -9 -8 122.269 72.797 4
 -1 9 7 19.464 82.149 1
 -1 9 7 -87.921 80.384 1
 -1 9 7 -34.411 43.877 5
 1 -9 -7 41.872 85.702 1
 1 -9 -7 -27.719 86.206 1
 1 -9 -7 -156.106 66.965 4
 -1 9 6 73.328 79.017 1
 -1 9 6 111.454 77.904 1
 -1 9 6 28.888 45.243 5
 1 -9 -6 30.26 81.733 1
 1 -9 -6 76.731 81.105 1
 1 -9 -6 158.077 71.098 4
 -1 9 5 -26.356 67.701 1
 -1 9 5 -36.191 76.665 1
 -1 9 5 4.156 45.12 5
 1 -9 -5 46.3 79.322 1
 1 -9 -5 65.869 77.512 1
 1 -9 -5 -127.695 61.697 4
 -1 9 4 2.914 68.994 1
 -1 9 4 40.441 74.772 1
 -1 9 4 39.478 44.927 5
 1 -9 -4 137.304 71.505 1
 1 -9 -4 104.51 75.472 1
 1 -9 -4 96.328 63.228 4
 -1 9 3 10.357 63.829 1
 -1 9 3 48.286 75.824 1
 -1 9 3 19.65 46.194 5
 1 -9 -3 65.763 68.433 1
 1 -9 -3 -5.973 68.405 1
 1 -9 -3 -92.515 94.254 4
 -1 9 2 678.208 86.749 1
 -1 9 2 631.703 87.594 1
 -1 9 2 949.599 77.803 2
 -1 9 2 907.414 93.716 5
 1 -9 -2 643.644 80.506 1
 1 -9 -2 722.558 86.019 1
 1 -9 -2 875.676 105.314 4
 -1 9 1 -38.596 63.596 1
 -1 9 1 -12.005 70.662 1
 -1 9 1 39.812 44.395 5
 1 -9 -1 112.279 69.133 1
 1 -9 -1 -100.862 61.632 1
 1 -9 -1 74.069 55.407 4
 -1 9 0 851 85.323 1
 -1 9 0 876.887 90.402 1
 -1 9 0 1047.1 91.3 4
 -1 9 0 1083 99.5 5
 1 -9 0 1232.8 137.5 1
 1 -9 0 776.977 87.122 1
 1 -9 0 1047.8 109.5 4
 1 -9 0 1120.8 97.9 5
 -1 9 -1 -2.572 64.076 1
 -1 9 -1 -6.774 71.794 1
 -1 9 -1 17.642 45.269 4
 -1 9 -1 41.436 47.381 5
 1 -9 1 -32.539 65.531 1
 1 -9 1 40.074 64.879 1
 1 -9 1 42.294 52.672 4
 1 -9 1 -48.634 45.466 5
 -1 9 -2 -79.75 59.668 1
 -1 9 -2 45.281 63.781 1
 -1 9 -2 -19.45 44.865 4
 -1 9 -2 37.534 52.502 5
 1 -9 2 63.482 61.865 1
 1 -9 2 -4.375 64.598 1
 1 -9 2 -49.408 49.874 4
 1 -9 2 149.068 63.081 5
 -1 9 -3 184.411 71.174 1
 -1 9 -3 285.078 74.688 1
 -1 9 -3 171.78 51.108 4
 -1 9 -3 197.991 93.872 5
 1 -9 3 330.969 75.565 1
 1 -9 3 355.489 73.893 1
 1 -9 3 265.306 56.453 4
 1 -9 3 248.919 57.136 5
 -1 9 -4 172.125 68.436 1
 -1 9 -4 106.23 62.632 1
 -1 9 -4 -2.998 45.006 4
 -1 9 -4 -65.136 51.523 5
 1 -9 4 90.047 69.201 1
 1 -9 4 84.727 71.701 1
 1 -9 4 -24.799 50.888 4
 1 -9 4 -91.49 47.835 5
 -1 9 -5 238.201 68.111 1
 -1 9 -5 143.969 66.315 1
 -1 9 -5 66.735 46.628 4
 -1 9 -5 83.449 57.239 5
 1 -9 5 54.51 66.46 1
 1 -9 5 155.685 72.214 1
 1 -9 5 74.879 51.97 4
 1 -9 5 52.551 54.557 5
 -1 9 -6 63.458 66.293 1
 -1 9 -6 188.381 66.105 1
 -1 9 -6 139.36 48.528 4
 -1 9 -6 -21.979 55.392 5
 1 -9 6 169.748 67.66 1
 1 -9 6 35.57 63.415 1
 1 -9 6 159.874 54.8 4
 1 -9 6 30.268 55.795 5
 -1 9 -7 445.009 75.046 1
 -1 9 -7 495.717 69.805 1
 -1 9 -7 507.801 60.728 4
 -1 9 -7 333.446 67.627 5
 1 -9 7 472.623 77.594 1
 1 -9 7 598.607 81.797 1
 1 -9 7 574.689 66.991 4
 1 -9 7 436.216 67.3 5
 -1 9 -8 365.085 75.257 1
 -1 9 -8 276.505 75.161 1
 -1 9 -8 219.95 91.242 4
 -1 9 -8 55.96 61.167 5
 1 -9 8 342.276 78.482 1
 1 -9 8 209.684 73.781 1
 1 -9 8 225.102 63.79 4
 1 -9 8 60.577 60.847 5
 -1 9 -9 -111.597 64.294 1
 -1 9 -9 64.595 71.024 1
 -1 9 -9 29.402 52.332 4
 -1 9 -9 -23.671 58.983 5
 1 -9 9 173.514 69.288 1
 1 -9 9 62.079 72.676 1
 1 -9 9 33.796 59.098 5
 -1 9 -10 -46.502 62.257 1
 -1 9 -10 124.441 70.594 1
 -1 9 -10 -29.706 52.919 4
 -1 9 -10 -82.404 56.86 5
 1 -9 10 -172.982 65.848 1
 1 -9 10 -50.565 65.268 1
 1 -9 10 -20.494 57.272 5
 -1 9 -11 495.581 86.828 1
 -1 9 -11 386.875 79.396 1
 -1 9 -11 377.74 63.949 4
 -1 9 -11 297.219 72.326 5
 1 -9 11 447.949 77.575 1
 1 -9 11 273.159 74.144 1
 1 -9 11 197.818 66.513 5
 -1 9 -12 176.967 79.68 1
 -1 9 -12 350.535 76.753 1
 -1 9 -12 86.427 59.723 4
 -1 9 -12 117.462 66.177 5
 1 -9 12 163.412 77.049 1
 1 -9 12 3.33 69.938 1
 1 -9 12 78.051 72.733 5
 -1 9 -13 1957.2 148.7 1
 -1 9 -13 1233.6 106.2 1
 -1 9 -13 1850.7 129 4
 -1 9 -13 1442 145.2 5
 1 -9 13 1348.6 144.8 1
 1 -9 13 1205.2 143.4 1
 1 -9 13 1341.9 157.7 5
 -1 9 -14 547.694 93.473 1
 -1 9 -14 605.056 77.687 4
 1 -9 14 531.991 88.799 1
 1 -9 14 365.67 92.743 1
 1 -9 14 446.97 90.007 5
 -1 9 -15 581.565 98.128 1
 -1 9 -15 720.719 99.824 1
 -1 9 -15 200.588 75.172 4
 1 -9 15 531.33 94.646 1
 1 -9 15 668.88 99.338 1
 1 -9 15 399.496 90.688 5
 -1 8 13 -110.459 98.793 1
 1 -8 -13 -89.352 107.528 1
 1 -8 -13 238.735 112.613 1
 -1 8 12 7.963 91.507 1
 -1 8 12 374.338 107.479 1
 1 -8 -12 322.036 109.906 1
 1 -8 -12 332.085 96.43 1
 1 -8 -12 68.737 80.646 4
 -1 8 11 2741.7 176.6 1
 -1 8 11 2847.8 179.4 1
 -1 8 11 2272 79.8 5
 1 -8 -11 3240.6 191.1 1
 1 -8 -11 3067.1 186.3 1
 1 -8 -11 2607.7 155.9 4
 -1 8 10 -39.972 83.904 1
 -1 8 10 68.13 83.269 1
 -1 8 10 89.781 37.258 5
 1 -8 -10 73.992 88.366 1
 1 -8 -10 150.614 86.078 1
 1 -8 -10 162.365 71.785 4
 -1 8 9 332.533 83.723 1
 -1 8 9 356.39 83.166 1
 -1 8 9 162.051 39.843 5
 1 -8 -9 169.199 80.646 1
 1 -8 -9 84.397 81.059 1
 1 -8 -9 168.059 67.933 4
 -1 8 8 628.396 89.178 1
 -1 8 8 772.875 90.742 1
 -1 8 8 684.257 76.721 5
 1 -8 -8 605.34 88.441 1
 1 -8 -8 689.556 87.608 1
 1 -8 -8 563.827 76.618 4
 -1 8 7 712.019 88.059 1
 -1 8 7 604.547 85.263 1
 -1 8 7 491.05 48.259 5
 1 -8 -7 673.23 88.658 1
 1 -8 -7 694.51 84.71 1
 1 -8 -7 585.975 74.088 4
 -1 8 6 -45.59 63.032 1
 -1 8 6 -9.733 113.79 1
 -1 8 6 2.376 37.258 5
 1 -8 -6 -44.147 66.202 1
 1 -8 -6 -118.101 65.489 1
 1 -8 -6 35.062 67.791 4
 -1 8 5 334.743 63.777 1
 -1 8 5 467.852 86.906 1
 -1 8 5 463.211 47.522 5
 1 -8 -5 604.673 77.979 1
 1 -8 -5 518.213 77.612 1
 1 -8 -5 529.446 66.31 4
 -1 8 4 -25.717 55.235 1
 -1 8 4 -27.37 62.026 1
 -1 8 4 37.812 39.009 5
 1 -8 -4 20.759 62.387 1
 1 -8 -4 163.005 70.346 1
 1 -8 -4 16.954 51.671 4
 -1 8 3 312.893 68.162 1
 -1 8 3 223.236 67.309 1
 -1 8 3 305.109 40.151 2
 -1 8 3 252.47 44.675 5
 1 -8 -3 215.705 64.421 1
 1 -8 -3 292.912 84.198 1
 1 -8 -3 240.747 54.405 4
 -1 8 2 2.84 54.879 1
 -1 8 2 17.723 61.319 1
 -1 8 2 -26.729 39.099 5
 1 -8 -2 61.013 122.594 1
 1 -8 -2 0.00616 47.6064 4
 -1 8 1 104.188 58.282 1
 -1 8 1 45.523 57.641 1
 -1 8 1 -26.585 41.188 5
 1 -8 -1 45.826 53.93 1
 1 -8 -1 -10.551 72.854 1
 1 -8 -1 50.786 47.467 4
 -1 8 0 128.331 82.798 1
 -1 8 0 217.204 63.871 1
 -1 8 0 127.521 41.378 4
 -1 8 0 154.257 46.874 5
 1 -8 0 211.909 66.151 1
 1 -8 0 132.895 101.21 1
 1 -8 0 237.98 48.918 4
 1 -8 0 177.078 43.367 5
 -1 8 -1 731.147 71.046 1
 -1 8 -1 926.94 111.142 1
 -1 8 -1 729.818 76.587 4
 -1 8 -1 643.084 56.82 5
 1 -8 1 1011.1 110 1
 1 -8 1 1021 92.8 4
 1 -8 1 941.178 87.398 5
 -1 8 -2 -72.51 52.238 1
 -1 8 -2 126.053 61.361 1
 -1 8 -2 43.876 38.943 4
 -1 8 -2 133.525 45.622 5
 1 -8 2 39.552 51.646 1
 1 -8 2 144.034 104.062 1
 1 -8 2 179.51 45.624 4
 1 -8 2 62.237 42.882 5
 -1 8 -3 831.908 75.831 1
 -1 8 -3 1103.4 110.3 1
 -1 8 -3 755.211 76.752 4
 -1 8 -3 932.337 91.493 5
 1 -8 3 840.435 103.755 1
 1 -8 3 722.923 77.755 1
 1 -8 3 860.698 87.471 4
 1 -8 3 716.333 61.979 5
 -1 8 -4 23.411 51.796 1
 -1 8 -4 8.764 66.336 1
 -1 8 -4 -11.337 38.05 4
 -1 8 -4 30.654 44.854 5
 1 -8 4 62.863 52.296 1
 1 -8 4 72.626 56.485 1
 1 -8 4 44.445 43.884 4
 1 -8 4 -42.3 41.714 5
 -1 8 -5 2328 123.6 1
 -1 8 -5 2123.9 165.3 1
 -1 8 -5 2332.4 91.8 4
 -1 8 -5 2331.3 113.7 5
 1 -8 5 2479.8 121.1 1
 1 -8 5 2565.9 133.1 1
 1 -8 5 2252.6 96.4 4
 1 -8 5 2215.3 107.8 5
 -1 8 -6 105.46 60.267 1
 -1 8 -6 117.21 57.07 1
 -1 8 -6 56.46 40.464 4
 -1 8 -6 18.87 56.866 5
 1 -8 6 83.753 55.931 1
 1 -8 6 77.551 58.387 1
 1 -8 6 52.53 47.856 4
 1 -8 6 -27.272 72.795 5
 -1 8 -7 65.508 59.66 1
 -1 8 -7 35.504 50.549 1
 -1 8 -7 -56.892 39.715 4
 -1 8 -7 6.071 52.351 5
 1 -8 7 126.776 57.932 1
 1 -8 7 104.554 59.306 1
 1 -8 7 14.403 46.553 4
 1 -8 7 -89.984 46.815 5
 -1 8 -8 73.49 56.979 1
 -1 8 -8 69.765 58.877 1
 -1 8 -8 88.377 45.493 4
 1 -8 8 -60.67 54.106 1
 1 -8 8 94.904 54.569 1
 1 -8 8 54.708 50.035 4
 1 -8 8 -75.135 48.85 5
 -1 8 -9 2001.6 121.9 1
 -1 8 -9 2307.3 126 1
 -1 8 -9 2238.1 104.4 4
 -1 8 -9 1647.3 121.7 5
 1 -8 9 2261.6 123.1 1
 1 -8 9 2064.9 120.3 1
 1 -8 9 1856.6 122.5 5
 -1 8 -10 320.186 71.413 1
 -1 8 -10 338.766 69.582 1
 -1 8 -10 353.687 57.439 4
 -1 8 -10 368.265 62.135 5
 1 -8 10 361.581 72.001 1
 1 -8 10 372.043 67.061 1
 1 -8 10 278.884 64.661 5
 -1 8 -11 261.506 69.382 1
 -1 8 -11 120.457 64.963 1
 -1 8 -11 214.055 94.338 4
 -1 8 -11 77.578 61.122 5
 1 -8 11 260.202 66.414 1
 1 -8 11 175.475 65.18 1
 1 -8 11 -6.919 56.876 5
 -1 8 -12 357.677 73.116 1
 -1 8 -12 390.136 73.302 1
 -1 8 -12 287.733 58.821 4
 -1 8 -12 61.917 57.399 5
 1 -8 12 347.807 69.814 1
 1 -8 12 358.091 70.93 1
 1 -8 12 319.368 69.293 5
 -1 8 -13 560.474 81.007 1
 -1 8 -13 399.835 67.207 4
 -1 8 -13 473.879 74.51 5
 1 -8 13 469.619 76.555 1
 1 -8 13 470.604 80.51 1
 1 -8 13 526.67 77.643 5
 -1 8 -14 357.492 74.916 1
 -1 8 -14 286.853 85.118 1
 -1 8 -14 262.631 61.479 4
 -1 8 -14 229.204 64.344 5
 1 -8 14 389.641 74.509 1
 1 -8 14 148.949 74.017 1
 1 -8 14 329.625 71.528 5
 -1 8 -15 1707.6 139.9 1
 -1 8 -15 1503.3 137.8 1
 -1 8 -15 1291.6 124 4
 1 -8 15 1572.5 157.3 1
 1 -8 15 1377.3 145.2 1
 1 -8 15 1417.9 150.6 5
 -1 8 -16 52.929 75.017 1
 -1 8 -16 93.322 71.392 1
 -1 8 -16 -132.859 62.773 4
 1 -8 16 159.803 91.121 1
 1 -8 16 4.277 76.353 1
 1 -8 16 -40.64 72.115 5
 -1 8 -17 144.321 82.237 1
 -1 8 -17 142.666 90.159 1
 -1 8 -17 9.606 71.342 4
 1 -8 17 128.165 80.998 1
 1 -8 17 58.348 86.799 1
 1 -8 17 104.033 82.622 5
 -1 7 15 61.211 105.614 1
 -1 7 15 106.945 108.487 1
 1 -7 -15 125.301 107.106 1
 1 -7 -15 -75.76 107.381 1
 1 -7 -15 16.624 88.592 4
 -1 7 14 -138.847 88.417 1
 -1 7 14 -44.962 91.551 1
 1 -7 -14 49.123 90.552 1
 1 -7 -14 -159.881 93.56 1
 1 -7 -14 -194.627 83.229 4
 -1 7 13 -79.811 83.074 1
 -1 7 13 -135.798 80.051 1
 -1 7 13 -17.672 33.415 5
 1 -7 -13 -72.108 94.203 1
 1 -7 -13 56.563 75.231 4
 -1 7 12 -29.072 80.541 1
 -1 7 12 -25.466 80.373 1
 -1 7 12 -32.635 33.036 5
 1 -7 -12 -122.227 83.835 1
 1 -7 -12 -210.207 82.353 1
 1 -7 -12 109.374 70.664 4
 -1 7 11 126.128 77.404 1
 -1 7 11 35.087 140.186 1
 -1 7 11 64.036 35.569 5
 1 -7 -11 225.873 84.752 1
 1 -7 -11 77.705 81.761 1
 1 -7 -11 158.823 67.525 4
 -1 7 10 1748.6 138.7 1
 -1 7 10 1453.3 147.1 1
 -1 7 10 1340.7 72.6 5
 1 -7 -10 1889.9 148.2 1
 1 -7 -10 1437.8 155.5 1
 1 -7 -10 1457.5 127.2 4
 -1 7 9 7113.7 182.7 1
 -1 7 9 7475.8 181.4 1
 -1 7 9 6172.7 101 5
 1 -7 -9 7370.1 181.7 1
 1 -7 -9 7115.6 219.1 1
 1 -7 -9 7070.1 164.1 4
 -1 7 8 3362.3 148.8 1
 -1 7 8 3797.2 151.3 1
 -1 7 8 3236.9 88.3 5
 1 -7 -8 3992.8 151.1 1
 1 -7 -8 4094.8 151.5 1
 1 -7 -8 3681.2 134.1 4
 -1 7 7 64.291 58.254 1
 -1 7 7 -28.038 57.373 1
 -1 7 7 -15.3 34.206 5
 1 -7 -7 63.932 64.191 1
 1 -7 -7 83.109 61.504 1
 1 -7 -7 -24.068 51.591 4
 -1 7 6 79.491 59.693 1
 -1 7 6 72.183 55.683 1
 -1 7 6 -14.613 34.912 5
 1 -7 -6 92.345 93.817 1
 1 -7 -6 133.032 61.663 1
 1 -7 -6 28.783 49.415 4
 -1 7 5 24.312 78.329 1
 -1 7 5 54.589 55.506 1
 -1 7 5 72.196 35.628 5
 1 -7 -5 37.446 52.445 1
 1 -7 -5 -104.109 52.378 1
 1 -7 -5 68.056 48.235 4
 -1 7 4 1560.1 108.7 1
 -1 7 4 1499.1 113.7 1
 -1 7 4 1476.2 78.2 5
 1 -7 -4 1588.2 111.3 1
 1 -7 -4 1541.8 110.4 1
 1 -7 -4 1563.7 97 4
 -1 7 3 1768.5 108.4 1
 -1 7 3 1917.2 110.4 1
 -1 7 3 1804.2 62.1 2
 -1 7 3 1691.4 81.1 5
 1 -7 -3 1767.9 111.2 1
 1 -7 -3 1670.6 108.5 1
 1 -7 -3 1946.3 94.2 4
 -1 7 2 393.362 62.777 1
 -1 7 2 298.037 60.491 1
 -1 7 2 313.606 42.826 5
 1 -7 -2 426.408 64.858 1
 1 -7 -2 361.256 59.495 1
 1 -7 -2 410.401 51.343 4
 -1 7 1 807.219 93.573 1
 -1 7 1 822.706 98.416 1
 -1 7 1 592.566 51.547 4
 -1 7 1 867.982 76.049 5
 1 -7 -1 871.738 100.314 1
 1 -7 -1 771.392 68.798 1
 1 -7 -1 736.601 80.083 4
 1 -7 -1 890.366 73.752 5
 -1 7 0 5105.2 129.8 1
 -1 7 0 5134.6 130.8 1
 -1 7 0 4336 99.7 4
 -1 7 0 4781.6 107 5
 1 -7 0 5098.1 129.3 1
 1 -7 0 4979 128.9 1
 1 -7 0 4735.8 106.5 4
 1 -7 0 4869.4 106.8 5
 -1 7 -1 11979.6 169.8 1
 -1 7 -1 11498.5 166.2 1
 -1 7 -1 10747.4 133.1 4
 -1 7 -1 11429.6 145.8 5
 1 -7 1 11395.8 163.9 1
 1 -7 1 11600.8 167 1
 1 -7 1 11300.7 140.5 4
 1 -7 1 11572.3 145.6 5
 -1 7 -2 7274.6 141.5 1
 -1 7 -2 7187.8 140.7 1
 -1 7 -2 6911 112.9 4
 -1 7 -2 7098.1 126 5
 1 -7 2 7026.3 136.8 1
 1 -7 2 7397.6 143.4 1
 1 -7 2 6833.1 116.1 4
 1 -7 2 7173.2 124.6 5
 -1 7 -3 292.713 55.482 1
 -1 7 -3 251.329 56.877 1
 -1 7 -3 136.553 41.472 4
 -1 7 -3 305.276 45.904 5
 1 -7 3 251.363 51.799 1
 1 -7 3 365.527 58.372 1
 1 -7 3 132.651 44.572 4
 1 -7 3 271.468 43.581 5
 -1 7 -4 14177.3 180.5 1
 -1 7 -4 13578.6 172.9 1
 -1 7 -4 13081.1 144.7 4
 -1 7 -4 13849.7 168 5
 1 -7 4 13654.7 176.2 1
 1 -7 4 14352.9 182 1
 1 -7 4 13253.9 147.4 4
 1 -7 4 13750 165 5
 -1 7 -5 46.1 48.247 1
 -1 7 -5 28.368 45.945 1
 -1 7 -5 -85.733 34.236 4
 -1 7 -5 74.976 41.036 5
 1 -7 5 6.949 46.96 1
 1 -7 5 9.257 51.082 1
 1 -7 5 -27.976 40.048 4
 1 -7 5 111.475 40.241 5
 -1 7 -6 108.287 49.374 1
 -1 7 -6 56.245 48.56 1
 -1 7 -6 1.62 36.694 4
 -1 7 -6 69.983 44.692 5
 1 -7 6 7.738 48.15 1
 1 -7 6 -6.009 48.789 1
 1 -7 6 -40.835 41.406 4
 1 -7 6 26.185 40.204 5
 -1 7 -7 689.241 67.981 1
 -1 7 -7 624.094 63.13 1
 -1 7 -7 550.437 50.318 4
 -1 7 -7 591.924 57.448 5
 1 -7 7 598.534 61.825 1
 1 -7 7 614.389 64.313 1
 1 -7 7 580.012 54.089 4
 1 -7 7 573.139 60.138 5
 -1 7 -8 139.608 53.258 1
 -1 7 -8 99.83 54.125 1
 -1 7 -8 197.9 43.958 4
 -1 7 -8 149.711 48.973 5
 1 -7 8 217.962 53.954 1
 1 -7 8 24.748 79.848 1
 1 -7 8 153.493 51.696 5
 -1 7 -9 2344.8 110.8 1
 -1 7 -9 1830.6 142.2 1
 -1 7 -9 2475.3 97.2 4
 -1 7 -9 1609.4 158.6 5
 1 -7 9 2104 106.4 1
 1 -7 9 2241.7 107.9 1
 1 -7 9 2068 132.8 5
 -1 7 -10 145.938 54.941 1
 -1 7 -10 218.479 58.477 1
 -1 7 -10 222.402 48.751 4
 -1 7 -10 148.666 54.78 5
 1 -7 10 258.037 58.01 1
 1 -7 10 176.68 54.957 1
 1 -7 10 174.456 54.554 5
 -1 7 -11 249.745 62.313 1
 -1 7 -11 186.288 57.73 1
 -1 7 -11 164.245 48.635 4
 -1 7 -11 164.016 57.463 5
 1 -7 11 64.321 55.637 1
 1 -7 11 101.628 54.279 1
 1 -7 11 -2.969 52.579 5
 -1 7 -12 124.402 61.88 1
 -1 7 -12 208.769 62.342 1
 -1 7 -12 221.053 50.28 4
 -1 7 -12 52.124 54.724 5
 1 -7 12 202.163 62.124 1
 1 -7 12 125.862 62.665 1
 1 -7 12 110.025 55.753 5
 -1 7 -13 176.461 60.895 1
 -1 7 -13 350.635 62.501 1
 -1 7 -13 144.441 62.228 4
 -1 7 -13 103.13 55.423 5
 1 -7 13 245.974 62.191 1
 1 -7 13 286.19 66.021 1
 1 -7 13 140.243 60.783 5
 -1 7 -14 334.175 66.239 1
 -1 7 -14 250.644 68.305 1
 -1 7 -14 300.94 58.267 4
 -1 7 -14 198.837 58.667 5
 1 -7 14 262.004 65.517 1
 1 -7 14 259.098 68.325 1
 1 -7 14 146.337 59.613 5
 -1 7 -15 118.537 65.86 1
 -1 7 -15 248.902 67.133 1
 -1 7 -15 81.101 60.007 4
 1 -7 15 187.011 65.235 1
 1 -7 15 62.841 66.564 1
 1 -7 15 168.396 65.403 5
 -1 7 -16 91.741 68.251 1
 -1 7 -16 11.985 62.823 1
 -1 7 -16 129.496 62.144 4
 1 -7 16 93.674 64.876 1
 1 -7 16 100.241 76.056 1
 1 -7 16 25.41 61.859 5
 -1 7 -17 454.253 81.481 1
 -1 7 -17 203.792 74.914 1
 -1 7 -17 255.083 71.759 4
 1 -7 17 375.498 78.096 1
 1 -7 17 228.51 80.821 1
 1 -7 17 344.283 73.622 5
 -1 7 -18 720.743 92.264 1
 -1 7 -18 678.615 124.776 1
 -1 7 -18 330.388 83.711 4
 1 -7 18 619.995 89.424 1
 1 -7 18 772.663 100.23 1
 1 -7 18 615.073 84.429 5
 -1 7 -19 -112.056 80.343 1
 -1 7 -19 -91.755 84.876 1
 -1 7 -19 -98.671 78.116 4
 1 -7 19 -9.89 105.901 1
 1 -7 19 31.048 86.4 1
 1 -7 19 -76.494 76.665 5
 -1 6 16 65.633 85.69 1
 -1 6 16 180.947 108.77 1
 1 -6 -16 47.208 94.518 1
 1 -6 -16 77.246 95.64 1
 1 -6 -16 -60.112 84.253 4
 -1 6 15 -37.499 82.019 1
 -1 6 15 151.638 97.092 1
 -1 6 15 -0.47 32.904 5
 1 -6 -15 21.078 84.959 1
 1 -6 -15 62.871 96.15 1
 1 -6 -15 90.15 81.778 4
 -1 6 14 33.772 76.227 1
 -1 6 14 103.573 166.691 1
 -1 6 14 1.646 33.564 5
 1 -6 -14 0.911 88.237 1
 1 -6 -14 106.803 86.445 1
 1 -6 -14 -85.25 70.542 4
 -1 6 13 170.288 74.842 1
 -1 6 13 214.579 87.178 1
 -1 6 13 133.065 34.257 5
 1 -6 -13 119.621 81.768 1
 1 -6 -13 203.839 101.944 1
 1 -6 -13 91.607 68.597 4
 -1 6 12 104.289 68.899 1
 -1 6 12 226.375 84.295 1
 -1 6 12 173.395 35.343 5
 1 -6 -12 153.963 78.164 1
 1 -6 -12 204.649 76.595 1
 1 -6 -12 168.696 66.762 4
 -1 6 11 -17.937 63.259 1
 -1 6 11 -111.978 67.144 1
 -1 6 11 84.271 32.914 5
 1 -6 -11 -39.706 68.441 1
 1 -6 -11 -78.046 67.634 1
 1 -6 -11 -10.07 60.338 4
 -1 6 10 1166.9 122.1 1
 -1 6 10 1481.9 126.6 1
 -1 6 10 1197.7 65.6 5
 1 -6 -10 1269.6 124.1 1
 1 -6 -10 1036.8 91.6 1
 1 -6 -10 1077.2 113.2 4
 -1 6 9 134.899 63.683 1
 -1 6 9 85.158 62.573 1
 -1 6 9 115.946 33.019 5
 1 -6 -9 232.154 66.465 1
 1 -6 -9 64.165 64.782 1
 1 -6 -9 111.325 51.349 4
 -1 6 8 40.115 70.261 1
 -1 6 8 55.064 55.676 1
 -1 6 8 35.653 30.189 5
 1 -6 -8 148.696 60.892 1
 1 -6 -8 32.58 58.416 1
 1 -6 -8 31.902 47.25 4
 -1 6 7 746.093 70.067 1
 -1 6 7 854.541 101.358 1
 -1 6 7 706.05 62.831 5
 1 -6 -7 923.901 103.309 1
 1 -6 -7 823.605 101.539 1
 1 -6 -7 678.553 59.153 4
 -1 6 6 521.21 59.962 1
 -1 6 6 739.532 92.408 1
 -1 6 6 554.352 60.634 5
 1 -6 -6 474.301 59.05 1
 1 -6 -6 647.474 68.549 1
 1 -6 -6 504.34 53.071 4
 -1 6 5 606.244 63.359 1
 -1 6 5 520.693 56.712 1
 -1 6 5 495.133 58.936 5
 1 -6 -5 566.681 62.515 1
 1 -6 -5 444.445 51.325 1
 1 -6 -5 704.649 77.777 4
 -1 6 4 1658.4 95.3 1
 -1 6 4 1467.8 95.1 1
 -1 6 4 1555.9 68 5
 1 -6 -4 1563.9 94.5 1
 1 -6 -4 1610.7 95.5 1
 1 -6 -4 1697.9 82.9 4
 -1 6 3 1223.9 93.2 1
 -1 6 3 1374.3 92.8 1
 -1 6 3 1457.4 51.5 2
 -1 6 3 1350.5 69.2 5
 1 -6 -3 1366.1 93.5 1
 1 -6 -3 1433 95.2 1
 1 -6 -3 1522.6 79.4 4
 -1 6 2 32182.5 235.5 1
 -1 6 2 31574.1 234.2 1
 -1 6 2 30760.6 190.5 5
 1 -6 -2 31852.4 235 1
 1 -6 -2 31927.8 234.5 1
 1 -6 -2 31428.4 199 4
 -1 6 1 2332.5 93.4 1
 -1 6 1 2272 93.5 1
 -1 6 1 2262.2 71.6 4
 -1 6 1 2075.1 76.5 5
 1 -6 -1 2384.8 95.5 1
 1 -6 -1 2320.8 94.5 1
 1 -6 -1 1888 76.8 4
 1 -6 -1 2397.4 75.1 5
 -1 6 0 73.695 41.485 1
 -1 6 0 68.494 40.36 1
 -1 6 0 47.876 29.084 4
 -1 6 0 46.95 31.257 5
 1 -6 0 74.047 41.525 1
 1 -6 0 69.245 42.316 1
 1 -6 0 -16.034 31.491 4
 1 -6 0 115.683 30.699 5
 -1 6 -1 94.708 40.894 1
 -1 6 -1 122.781 41.808 1
 -1 6 -1 65.611 28.923 4
 -1 6 -1 81.448 32.561 5
 1 -6 1 46.116 32.512 1
 1 -6 1 128.059 42.742 1
 1 -6 1 51.219 32.149 4
 1 -6 1 69.318 30.151 5
 -1 6 -2 223.529 45.809 1
 -1 6 -2 260.466 47.229 1
 -1 6 -2 212.779 33.371 4
 -1 6 -2 291.313 38.899 5
 1 -6 2 225.269 43.768 1
 1 -6 2 221.229 44.505 1
 1 -6 2 223.384 35.547 4
 1 -6 2 218.66 35.711 5
 -1 6 -3 414.799 49.748 1
 -1 6 -3 259.438 43.682 1
 -1 6 -3 308.459 35.869 4
 -1 6 -3 363 41.182 5
 1 -6 3 292.17 45.736 1
 1 -6 3 309.297 47.369 1
 1 -6 3 256.185 35.955 4
 1 -6 3 341.768 39.531 5
 -1 6 -4 2521.2 93.4 1
 -1 6 -4 2556.6 89.6 1
 -1 6 -4 2682.8 73.7 4
 -1 6 -4 2584.6 86.9 5
 1 -6 4 2655 92.4 1
 1 -6 4 2535.2 92.6 1
 1 -6 4 2593 75.3 4
 1 -6 4 2676 85.5 5
 -1 6 -5 644.797 79.184 1
 -1 6 -5 867.223 76.668 1
 -1 6 -5 750.14 61.136 4
 -1 6 -5 815.3 72.268 5
 1 -6 5 693.909 76.316 1
 1 -6 5 719.512 79.193 1
 1 -6 5 600.444 63.063 4
 1 -6 5 696.885 70.727 5
 -1 6 -6 2533.8 96.2 1
 -1 6 -6 2589.2 93.9 1
 -1 6 -6 2396.5 76.7 4
 -1 6 -6 2604 92.5 5
 1 -6 6 2400.2 87.6 1
 1 -6 6 2531.7 93.5 1
 1 -6 6 2396.4 78.8 4
 1 -6 6 2546.9 91.5 5
 -1 6 -7 61.713 40.508 1
 -1 6 -7 -11.657 38.784 1
 -1 6 -7 10.957 31.943 4
 -1 6 -7 65.234 40.625 5
 1 -6 7 78.174 41.149 1
 1 -6 7 -7.988 41.703 1
 1 -6 7 -11.694 34.686 4
 1 -6 7 94.627 38.847 5
 -1 6 -8 1448.5 86.4 1
 -1 6 -8 1314.2 87.7 1
 -1 6 -8 1439.2 76.5 4
 -1 6 -8 1518.5 93.2 5
 1 -6 8 1280 85.6 1
 1 -6 8 1273.6 85.5 1
 1 -6 8 1551.4 91.4 5
 -1 6 -9 10439.7 154.2 1
 -1 6 -9 10756.5 155.3 1
 -1 6 -9 10428.5 137.3 4
 -1 6 -9 10608 160.7 5
 1 -6 9 10040 153.1 1
 1 -6 9 10169.6 150.8 1
 1 -6 9 10772.8 159.7 5
 -1 6 -10 23706.6 218.3 1
 -1 6 -10 23030.2 214.7 1
 -1 6 -10 23138 198.4 4
 -1 6 -10 23527.3 228.6 5
 1 -6 10 23073.3 215.2 1
 1 -6 10 22651.5 212 1
 1 -6 10 23808.4 227.7 5
 -1 6 -11 30.261 51.399 1
 -1 6 -11 -63.466 51.514 1
 -1 6 -11 155.977 45.058 4
 -1 6 -11 116.597 48.566 5
 1 -6 11 -14.731 52.378 1
 1 -6 11 -180.325 92.74 1
 1 -6 11 134.061 63.438 5
 -1 6 -12 20636.7 275.4 1
 -1 6 -12 22867.9 214.4 4
 -1 6 -12 22729.7 250.1 5
 1 -6 12 22637 227.3 1
 1 -6 12 22982 229.4 1
 1 -6 12 23559.7 240.3 5
 -1 6 -13 26617.8 248.4 1
 -1 6 -13 26709.3 247.6 1
 -1 6 -13 27739.3 243.9 4
 -1 6 -13 26860.2 262.5 5
 1 -6 13 26090.4 244.5 1
 1 -6 13 26591.3 249.2 1
 1 -6 13 27390.1 264 5
 -1 6 -14 188.457 61.234 1
 -1 6 -14 139.738 54.917 1
 -1 6 -14 248.019 100.566 4
 -1 6 -14 178.714 53.473 5
 1 -6 14 143.151 54.937 1
 1 -6 14 134.867 61.099 1
 1 -6 14 137.543 53.75 5
 -1 6 -15 625.326 73.676 1
 -1 6 -15 672.944 74.166 1
 -1 6 -15 545.61 68.77 4
 1 -6 15 651.642 70.789 1
 1 -6 15 696.39 74.832 1
 1 -6 15 613.854 68.018 5
 -1 6 -16 -31.058 60.15 1
 -1 6 -16 -65.622 56.036 1
 -1 6 -16 61.657 59.367 4
 1 -6 16 -26.4 52.622 1
 1 -6 16 -19.343 65.343 1
 1 -6 16 -26.075 57.044 5
 -1 6 -17 -41.046 61.702 1
 -1 6 -17 -41.985 67.168 1
 -1 6 -17 -31.048 61.057 4
 1 -6 17 -13.472 62.788 1
 1 -6 17 -55.098 63.376 1
 1 -6 17 -23.95 58.494 5
 -1 6 -18 180.704 74.762 1
 -1 6 -18 221.275 72.905 1
 -1 6 -18 178.609 69.542 4
 1 -6 18 199.33 72.187 1
 1 -6 18 261.991 77.662 1
 1 -6 18 201.297 68.798 5
 -1 6 -19 -134.523 73.321 1
 -1 6 -19 -55.025 81.359 1
 -1 6 -19 39.226 72.587 4
 1 -6 19 20.031 74.75 1
 1 -6 19 -155.631 73.421 1
 1 -6 19 120.143 70.925 5
 -1 6 -20 913.099 100.489 1
 -1 6 -20 920.39 123.183 1
 -1 6 -20 987.802 101.351 4
 1 -6 20 787.379 89.861 1
 1 -6 20 1005.7 103.7 1
 1 -6 20 722.516 98.414 5
 -1 5 18 -92.088 99.836 1
 -1 5 18 140.604 112.843 1
 -1 5 18 -53.986 45.008 5
 1 -5 -18 -233.823 93.583 1
 1 -5 -18 271.835 106.447 1
 -1 5 17 -125.03 89.406 1
 -1 5 17 -98.01 92.303 1
 -1 5 17 -10.59 42.631 5
 1 -5 -17 -125.854 82.811 1
 1 -5 -17 88.846 86.345 1
 -1 5 16 79.261 77.797 1
 -1 5 16 84.302 154.272 1
 -1 5 16 61.891 40.994 5
 1 -5 -16 106.451 88.364 1
 1 -5 -16 132.469 80.189 1
 -1 5 15 738.937 88.643 1
 -1 5 15 988.774 105.886 1
 1 -5 -15 591.545 86.869 1
 -1 5 14 1077 134.1 1
 -1 5 14 921.291 95.68 1
 1 -5 -14 737.381 94.91 1
 1 -5 -14 686.631 87.495 1
 -1 5 13 348.157 73.453 1
 -1 5 13 392.612 83.64 1
 1 -5 -13 362.369 76.716 1
 1 -5 -13 297.801 74.155 1
 -1 5 12 36.23 61.595 1
 -1 5 12 56.175 66.855 1
 -1 5 12 71.03 33.06 5
 1 -5 -12 -12.663 64.775 1
 1 -5 -12 31.43 67.977 1
 -1 5 11 56.928 57.919 1
 -1 5 11 52.15 59.657 1
 -1 5 11 14.492 29.929 5
 1 -5 -11 86.31 65.924 1
 1 -5 -11 -19.111 59.901 1
 -1 5 10 -39.273 104.119 1
 -1 5 10 -16.777 55.021 1
 -1 5 10 17.943 30.741 5
 1 -5 -10 3.79 56.055 1
 1 -5 -10 117.288 58.789 1
 1 -5 -10 60.491 49.048 4
 -1 5 9 1498.4 107.4 1
 -1 5 9 1707.6 106.9 1
 -1 5 9 1604.2 63.3 5
 1 -5 -9 1878.8 107.5 1
 1 -5 -9 1885.5 111.3 1
 1 -5 -9 1918.2 96.2 4
 -1 5 8 284.515 54.35 1
 -1 5 8 303.885 51.507 1
 -1 5 8 238.686 31.091 5
 1 -5 -8 322.758 52.967 1
 1 -5 -8 303.074 52.954 1
 1 -5 -8 259.058 48.525 4
 -1 5 7 516.739 58.997 1
 -1 5 7 437.369 56.021 1
 -1 5 7 466.952 51.602 5
 1 -5 -7 349.404 56.98 1
 1 -5 -7 476.996 57.28 1
 1 -5 -7 381.901 46.824 4
 -1 5 6 3740.8 105.8 1
 -1 5 6 3619.7 103.5 1
 -1 5 6 3318 71 5
 1 -5 -6 3563.6 103.6 1
 1 -5 -6 3764.5 108.2 1
 1 -5 -6 3639.5 92.8 4
 -1 5 5 214.454 40.259 1
 -1 5 5 157.098 39.949 1
 -1 5 5 234.117 29.913 5
 1 -5 -5 215.279 45.603 1
 1 -5 -5 169.403 43.218 1
 1 -5 -5 236.946 39.184 4
 -1 5 4 8089.1 126.9 1
 -1 5 4 7836.9 124.9 1
 -1 5 4 7423.6 67.9 2
 -1 5 4 7412.7 92.6 5
 1 -5 -4 8051.6 126.1 1
 1 -5 -4 8017 126.1 1
 1 -5 -4 7594.2 107 4
 -1 5 3 5908 110.8 1
 -1 5 3 5912.8 109.8 1
 -1 5 3 5421.3 64.9 2
 -1 5 3 5581.1 85.5 5
 1 -5 -3 5908.3 109.8 1
 1 -5 -3 5872.9 109.7 1
 1 -5 -3 5832 94.8 4
 -1 5 2 3004.2 90.5 1
 -1 5 2 3039.9 89.1 1
 -1 5 2 2838.2 70.8 5
 1 -5 -2 3009.2 88.4 1
 1 -5 -2 3060.2 89.1 1
 1 -5 -2 2893.1 74.2 4
 -1 5 1 1616.3 78.7 1
 -1 5 1 1654.6 78.9 1
 -1 5 1 1564.5 58.4 4
 -1 5 1 1490.4 63.5 5
 1 -5 -1 1487.8 77.3 1
 1 -5 -1 1606.3 78.4 1
 1 -5 -1 1620.7 62 4
 1 -5 -1 1672.2 61.8 5
 -1 5 0 26243.3 187.5 1
 -1 5 0 26518.5 189.1 1
 -1 5 0 25469.9 151.1 4
 -1 5 0 25598 166.2 5
 1 -5 0 25661.3 185.1 1
 1 -5 0 26373.8 188.5 1
 1 -5 0 25323.5 152 4
 1 -5 0 25517 164.6 5
 -1 5 -1 238.062 38.281 1
 -1 5 -1 261.795 41.287 1
 -1 5 -1 169.597 29.158 4
 -1 5 -1 214.296 32.215 5
 1 -5 1 217.883 41.172 1
 1 -5 1 235.175 39.618 1
 1 -5 1 187.443 30.943 4
 1 -5 1 244.681 32.169 5
 -1 5 -2 6060 103.8 1
 -1 5 -2 5679 80.2 4
 -1 5 -2 5690 94 5
 1 -5 2 5867.6 101.6 1
 1 -5 2 5906.1 99.9 1
 1 -5 2 5612.9 81.4 4
 1 -5 2 5938.4 93.6 5
 -1 5 -3 2961.5 83.1 1
 -1 5 -3 2769.3 79.1 1
 -1 5 -3 2781.4 64.5 4
 -1 5 -3 2889.3 78.6 5
 1 -5 3 2858.3 81.7 1
 1 -5 3 2801.4 80.8 1
 1 -5 3 2754 67.1 4
 1 -5 3 2893.9 75.5 5
 -1 5 -4 89.289 37.742 1
 -1 5 -4 99.594 35.628 1
 -1 5 -4 85.36 27.019 4
 -1 5 -4 142.344 32.125 5
 1 -5 4 52.466 35.583 1
 1 -5 4 111.08 36.848 1
 1 -5 4 135.529 29.643 4
 1 -5 4 116.799 28.55 5
 -1 5 -5 31674.4 205.1 1
 -1 5 -5 30994.4 202.4 1
 -1 5 -5 29800.4 170.2 4
 -1 5 -5 30356.4 203.8 5
 1 -5 5 29577.7 196.7 1
 1 -5 5 31387.1 203.8 1
 1 -5 5 30191.3 172.1 4
 1 -5 5 30357 203.1 5
 -1 5 -6 558.438 68.098 1
 -1 5 -6 567.29 64.366 1
 -1 5 -6 375.842 34.699 4
 -1 5 -6 527.306 65.092 5
 1 -5 6 496.531 61.153 1
 1 -5 6 571.749 66.485 1
 1 -5 6 453.374 39.972 4
 1 -5 6 603.76 65.917 5
 -1 5 -7 58.112 34.575 1
 -1 5 -7 103.687 37.929 1
 -1 5 -7 41.971 28.166 4
 -1 5 -7 77.594 33.215 5
 1 -5 7 111.227 36.023 1
 1 -5 7 81.601 36.155 1
 1 -5 7 112.531 32.901 5
 -1 5 -8 28.198 36.072 1
 -1 5 -8 24.2 33.566 1
 -1 5 -8 2.464 29.416 4
 -1 5 -8 8.472 32.29 5
 1 -5 8 -14.056 34.611 1
 1 -5 8 -16.288 33.696 1
 1 -5 8 24.176 33.531 5
 -1 5 -9 22589.1 188.2 1
 -1 5 -9 22615.2 188.6 1
 -1 5 -9 22389.2 176.8 4
 -1 5 -9 22898.2 202.6 5
 1 -5 9 22649.8 188.9 1
 1 -5 9 22465 187 1
 1 -5 9 22667.3 200.2 5
 -1 5 -10 6049.1 116.4 1
 -1 5 -10 5955.2 118.2 1
 -1 5 -10 5863.4 112 4
 -1 5 -10 6081.5 125.2 5
 1 -5 10 5840.2 115.4 1
 1 -5 10 5916.3 115.8 1
 1 -5 10 6149.9 125.2 5
 -1 5 -11 9691.7 144.7 1
 -1 5 -11 10075.8 145.4 1
 -1 5 -11 9828.1 141.2 4
 -1 5 -11 10176.1 156.2 5
 1 -5 11 9583 142.9 1
 1 -5 11 9798 145.8 1
 1 -5 11 9996.9 155.1 5
 -1 5 -12 5209.6 127.4 1
 -1 5 -12 5153.5 125.6 1
 -1 5 -12 5711.7 124.2 4
 -1 5 -12 5875.4 137.4 5
 1 -5 12 5096 124.7 1
 1 -5 12 5234.8 126.5 1
 1 -5 12 5948.6 136.3 5
 -1 5 -13 7614 150.4 1
 -1 5 -13 7725.7 144.9 1
 -1 5 -13 7934.4 146 4
 -1 5 -13 7620.7 152.8 5
 1 -5 13 7324.9 144.2 1
 1 -5 13 7114.4 177.6 1
 1 -5 13 7686.6 185.7 5
 -1 5 -14 13058.2 185.5 1
 -1 5 -14 12986.6 179.9 1
 -1 5 -14 13036.5 183.2 4
 -1 5 -14 13128.3 213.2 5
 1 -5 14 12572.8 177.2 1
 1 -5 14 13102.8 181.9 1
 1 -5 14 13429.4 192.2 5
 -1 5 -15 2036.9 118.8 1
 -1 5 -15 2125.4 114.6 1
 -1 5 -15 2186.3 116.7 4
 1 -5 15 1993 112.2 1
 1 -5 15 2016.2 116.9 1
 1 -5 15 2288.3 123.2 5
 -1 5 -16 18.683 61.133 1
 -1 5 -16 23.612 54.215 1
 -1 5 -16 2.857 56.783 4
 1 -5 16 16.965 54.402 1
 1 -5 16 67.084 58.509 1
 1 -5 16 23.649 53.491 5
 -1 5 -17 -5.832 57.745 1
 -1 5 -17 139.506 64.608 1
 -1 5 -17 191.668 65.005 4
 1 -5 17 -58.877 53.508 1
 1 -5 17 -5.013 60.567 1
 1 -5 17 135.848 58.242 5
 -1 5 -18 775.591 80.846 1
 -1 5 -18 896.008 88.123 1
 -1 5 -18 749.42 81.902 4
 1 -5 18 810.143 77.253 1
 1 -5 18 773.619 83.637 1
 1 -5 18 678.798 75.535 5
 -1 5 -19 358.203 76.533 1
 -1 5 -19 486.789 82.467 1
 -1 5 -19 454.384 78.145 4
 1 -5 19 109.232 74.52 1
 1 -5 19 469.25 76.954 1
 1 -5 19 372.447 72.755 5
 -1 5 -20 177.146 80.842 1
 -1 5 -20 -25.368 81.702 1
 -1 5 -20 119.756 74.706 4
 1 -5 20 1.171 74.558 1
 1 -5 20 61.179 79.763 1
 1 -5 20 69.192 74.276 3
 1 -5 20 189.508 73.673 5
 -1 4 19 62.74 96.376 1
 -1 4 19 -134.347 99.488 1
 -1 4 19 -12.191 50.4 5
 1 -4 -19 199.92 108.871 1
 -1 4 18 121.842 83.456 1
 -1 4 18 -9.497 119.863 1
 -1 4 18 56.758 46.257 5
 1 -4 -18 28.799 87.53 1
 1 -4 -18 220.381 101.181 1
 -1 4 17 57.163 73.506 1
 -1 4 17 59.706 89.917 1
 -1 4 17 -21.11 43.924 5
 1 -4 -17 -73.281 78.222 1
 1 -4 -17 104.87 107.979 1
 -1 4 16 -25.113 70.549 1
 -1 4 16 161.182 86.171 1
 -1 4 16 -25.953 41.58 5
 1 -4 -16 110.756 78.615 1
 1 -4 -16 24.687 83.743 1
 -1 4 15 218.771 78.065 1
 1 -4 -15 123.014 71.924 1
 1 -4 -15 139.698 77.219 1
 -1 4 14 75.62 63.995 1
 -1 4 14 11.775 69.63 1
 1 -4 -14 127.706 71.623 1
 1 -4 -14 62.802 71.635 1
 -1 4 13 244.737 59.398 1
 -1 4 13 295.376 69.197 1
 1 -4 -13 278.652 64.935 1
 1 -4 -13 256.211 69.377 1
 -1 4 12 3596.8 126.8 1
 -1 4 12 3448.9 130.5 1
 1 -4 -12 3665.6 151.8 1
 1 -4 -12 3687 135.8 1
 -1 4 11 51.359 48.61 1
 -1 4 11 76.39 53.468 1
 1 -4 -11 77.128 56.103 1
 1 -4 -11 156.744 58.797 1
 -1 4 10 4236.6 117.4 1
 -1 4 10 4314.2 122.3 1
 1 -4 -10 4317.3 122.2 1
 1 -4 -10 4316.2 123.4 1
 -1 4 9 185.146 47.699 1
 -1 4 9 209.005 47.612 1
 1 -4 -9 264.517 50.841 1
 1 -4 -9 306.862 52.578 1
 -1 4 8 424.05 50.766 1
 -1 4 8 481.315 52.573 1
 1 -4 -8 430.798 50.889 1
 1 -4 -8 446.268 53.787 1
 -1 4 7 443.636 49.027 1
 -1 4 7 380.045 46.276 1
 1 -4 -7 403.223 49.242 1
 1 -4 -7 400.173 44.655 1
 -1 4 6 15818.6 158.2 1
 -1 4 6 15436.5 155.4 1
 -1 4 6 14464.2 112 5
 1 -4 -6 15272.8 154.6 1
 1 -4 -6 15871.6 158.8 1
 -1 4 5 12864.7 140.2 1
 -1 4 5 12736.3 138.5 1
 -1 4 5 11980.2 102.3 5
 1 -4 -5 12527.6 137.4 1
 1 -4 -5 12886.4 140.8 1
 1 -4 -5 12387.3 120.9 4
 -1 4 4 7544.9 111 1
 -1 4 4 7243.5 106.9 1
 -1 4 4 7129.1 62.7 2
 -1 4 4 7085.4 83.4 5
 1 -4 -4 7331.4 109.9 1
 1 -4 -4 7463.7 111.1 1
 1 -4 -4 7753.9 97 4
 -1 4 3 22769.7 167 1
 -1 4 3 21724.4 104.5 2
 -1 4 3 21770.4 133.2 5
 1 -4 -3 22180.7 165.5 1
 1 -4 -3 23367.8 170.5 1
 1 -4 -3 21711.2 138.4 4
 -1 4 2 11788.1 123.6 1
 -1 4 2 11439.6 122.2 1
 -1 4 2 11145.1 83.2 2
 -1 4 2 11145.2 100.7 5
 1 -4 -2 11437.6 122.2 1
 1 -4 -2 11620.2 122.6 1
 1 -4 -2 11487.1 101.3 4
 -1 4 1 8094.9 105 1
 -1 4 1 7821.4 102.6 1
 -1 4 1 7735.8 81.2 4
 -1 4 1 7817.2 89 5
 1 -4 -1 7828.2 103.5 1
 1 -4 -1 7976.5 83.5 4
 1 -4 -1 8022.1 89.1 5
 -1 4 0 66454 257 1
 -1 4 0 65627.5 255 1
 -1 4 0 64741.8 201.9 4
 -1 4 0 64010.7 231.2 5
 1 -4 0 64428.9 252.1 1
 1 -4 0 66172.9 255.8 1
 1 -4 0 64765.9 202.5 4
 1 -4 0 64644.8 232.4 5
 -1 4 -1 10632.1 111.2 1
 -1 4 -1 10249.3 109.1 1
 -1 4 -1 9864.2 86.3 4
 -1 4 -1 10046.6 103.4 5
 1 -4 1 10458 111.6 1
 1 -4 1 10611.8 112.7 1
 1 -4 1 9866.1 86.8 4
 1 -4 1 9982 102.5 5
 -1 4 -2 3724.7 77.9 1
 -1 4 -2 3580.1 73.9 1
 -1 4 -2 3390.3 58.1 4
 -1 4 -2 3509.4 73.1 5
 1 -4 2 3588 74.2 1
 1 -4 2 3737.1 77 1
 1 -4 2 3452.8 60.3 4
 1 -4 2 3623.9 72.6 5
 -1 4 -3 3522.8 76.2 1
 -1 4 -3 3396.6 74.9 1
 -1 4 -3 3392.6 59.2 4
 -1 4 -3 3416.6 74.7 5
 1 -4 3 3411.3 75 1
 1 -4 3 3584.5 76.3 1
 1 -4 3 3442.4 60.8 4
 -1 4 -4 9551.3 107.9 1
 -1 4 -4 8996.5 104.6 1
 -1 4 -4 9010.2 87.1 4
 -1 4 -4 9241.4 108.9 5
 1 -4 4 8898.6 102.2 1
 1 -4 4 9178 105 1
 1 -4 4 8986.5 88.2 4
 1 -4 4 8956.5 107 5
 -1 4 -5 2511.2 73.7 1
 -1 4 -5 2544.2 70.5 1
 -1 4 -5 2593.7 59.8 4
 -1 4 -5 2758.8 75.7 5
 1 -4 5 2504.6 70 1
 1 -4 5 2672.7 73.1 1
 1 -4 5 2749.5 75 5
 -1 4 -6 53454.7 237.3 1
 -1 4 -6 53360.1 236.3 1
 -1 4 -6 53729 215.8 4
 -1 4 -6 53246.3 252.2 5
 1 -4 6 53386.7 236.6 1
 1 -4 6 53411 236.4 1
 1 -4 6 53925.6 253.4 5
 -1 4 -7 43135.1 219 1
 -1 4 -7 41857.4 215.5 1
 -1 4 -7 42088 202.9 4
 -1 4 -7 42780.9 234.4 5
 1 -4 7 42339.1 216.8 1
 1 -4 7 41625.6 214.5 1
 1 -4 7 41875.1 231.7 5
 -1 4 -8 11195.7 123.3 1
 -1 4 -8 10941.3 123 1
 -1 4 -8 10903.1 117.4 4
 -1 4 -8 11119.2 133.7 5
 1 -4 8 10951.2 121.7 1
 1 -4 8 10768.1 120.8 1
 1 -4 8 11165.1 132.9 5
 -1 4 -9 506.49 61.3 1
 -1 4 -9 399.166 41.043 4
 -1 4 -9 383.739 41.93 5
 1 -4 9 394.367 41.514 1
 1 -4 9 397.202 43.603 1
 1 -4 9 275.854 36.667 5
 -1 4 -10 1894.6 79.8 1
 -1 4 -10 1952.8 76.4 1
 -1 4 -10 1820.5 76.8 4
 -1 4 -10 1888.6 84.8 5
 1 -4 10 1841.3 76 1
 1 -4 10 1967.4 76.1 1
 1 -4 10 1878.5 81.9 5
 -1 4 -11 708.741 74.126 1
 -1 4 -11 664.34 67.968 1
 -1 4 -11 481.335 46.749 4
 -1 4 -11 657.976 77.904 5
 1 -4 11 617.833 68.523 1
 1 -4 11 667.635 70.378 1
 1 -4 11 535.655 47.537 5
 -1 4 -12 15737.6 168 1
 -1 4 -12 15383.1 162.4 1
 -1 4 -12 15567 169.7 4
 -1 4 -12 15788.3 177.2 5
 1 -4 12 14933 162.6 1
 1 -4 12 15391.9 164.9 1
 1 -4 12 15810.3 178.3 5
 -1 4 -13 1329.3 98 1
 -1 4 -13 1334.6 93.8 1
 -1 4 -13 1370.5 98.2 4
 -1 4 -13 1785 97.5 5
 1 -4 13 1244.7 96.2 1
 1 -4 13 1317 96.1 1
 1 -4 13 1732.1 102.4 5
 -1 4 -14 7463.3 142.2 1
 -1 4 -14 7535.7 142.6 1
 -1 4 -14 7334.9 148.2 4
 1 -4 14 7223.7 138.2 1
 1 -4 14 6186.6 201.3 1
 1 -4 14 7673 149.4 5
 -1 4 -15 1321.2 110.4 1
 -1 4 -15 1585.3 104.3 1
 -1 4 -15 1090 134.7 4
 1 -4 15 1476.7 101.9 1
 1 -4 15 1510.3 105.9 1
 1 -4 15 1747 137.1 5
 -1 4 -16 157.429 53.386 1
 -1 4 -16 103.86 55.884 1
 -1 4 -16 48.313 57.193 4
 1 -4 16 47.867 55.473 1
 1 -4 16 121.681 57.621 1
 1 -4 16 104.233 51.275 5
 -1 4 -17 992.145 110.172 1
 -1 4 -17 1031.3 108.6 1
 -1 4 -17 684.856 74.588 4
 1 -4 17 937.153 103.388 1
 1 -4 17 1157.3 109.6 1
 1 -4 17 999.802 110.959 5
 -1 4 -18 651.486 75.497 1
 -1 4 -18 621.367 77.164 1
 -1 4 -18 595.935 79.042 4
 1 -4 18 543.315 71.035 1
 1 -4 18 581.367 75.823 1
 1 -4 18 620.44 79.472 3
 1 -4 18 386.54 64.101 5
 -1 4 -19 1568.5 131.9 1
 -1 4 -19 1410 131.7 1
 -1 4 -19 1109.2 94.9 4
 1 -4 19 1016 117.3 1
 1 -4 19 1309.5 131.2 1
 1 -4 19 1195.5 115.5 3
 1 -4 19 1508.7 133.2 5
 -1 4 -20 3153.2 157 1
 -1 4 -20 3115.2 162.5 1
 -1 4 -20 3204.7 172.4 4
 1 -4 20 3071.2 148.9 1
 1 -4 20 3309.3 154.8 1
 1 -4 20 2635.9 134.3 3
 1 -4 20 3398.7 156.3 5
 -1 4 -21 118.228 80.358 1
 -1 4 -21 116.815 89.771 1
 -1 4 -21 123.72 86.018 4
 1 -4 21 101.718 75.094 1
 1 -4 21 62.528 83.328 1
 1 -4 21 91.598 77.595 3
 1 -4 21 241.249 74.309 5
 -1 3 20 -9.481 88.444 1
 -1 3 20 -6.646 98.412 1
 -1 3 20 -78.756 58.691 5
 1 -3 -20 -94.84 91.069 1
 1 -3 -20 180.449 103.299 1
 1 -3 -20 105.747 81.272 2
 -1 3 19 104.562 84.703 1
 -1 3 19 155.77 164.039 1
 -1 3 19 214.923 55.263 3
 -1 3 19 -19.647 54.267 5
 1 -3 -19 193.524 95.716 1
 1 -3 -19 76.876 92.994 1
 1 -3 -19 109.78 67.66 2
 -1 3 18 44.989 70.228 1
 -1 3 18 -34.951 80.407 1
 -1 3 18 86.941 47.961 5
 1 -3 -18 97.76 82.131 1
 1 -3 -18 89.633 65.189 2
 -1 3 17 1514.7 135.8 1
 -1 3 17 1166.5 102.7 1
 -1 3 17 1150.3 79.4 3
 -1 3 17 1071.3 94 5
 1 -3 -17 1344.3 137.5 1
 1 -3 -17 1840 153 1
 1 -3 -17 1357.6 102.7 2
 -1 3 16 479.633 73.017 1
 -1 3 16 535.601 83.41 1
 -1 3 16 453.352 43.798 3
 -1 3 16 388.477 50.39 5
 1 -3 -16 512.798 83.662 1
 1 -3 -16 516.95 83.267 1
 1 -3 -16 537.665 63.24 2
 -1 3 15 1029.1 114.8 1
 -1 3 15 1187.6 129.4 1
 -1 3 15 903.009 53.197 3
 1 -3 -15 897.143 85.571 1
 1 -3 -15 1016.9 120.2 1
 1 -3 -15 871.139 85.761 2
 -1 3 14 435.337 62.531 1
 -1 3 14 482.378 76.393 1
 -1 3 14 406.402 44.073 3
 1 -3 -14 392.991 70.604 1
 1 -3 -14 393.352 71.105 1
 1 -3 -14 441.664 51.735 2
 -1 3 13 537.428 78.223 1
 -1 3 13 570.15 70.744 1
 1 -3 -13 510.857 67.327 1
 1 -3 -13 549.418 69.997 1
 1 -3 -13 658.576 69.644 2
 -1 3 12 1169.6 100.1 1
 -1 3 12 1127.5 102.4 1
 1 -3 -12 1285.7 103 1
 1 -3 -12 1278.5 99.4 1
 1 -3 -12 1171 66.6 2
 -1 3 11 13658.3 167.5 1
 -1 3 11 13673.1 169.6 1
 1 -3 -11 13715.4 168.4 1
 1 -3 -11 13653.3 169.4 1
 1 -3 -11 13840 110.6 2
 -1 3 10 3082.9 99.1 1
 -1 3 10 3193.3 102.2 1
 1 -3 -10 3132.5 103.3 1
 1 -3 -10 3147.8 99.9 1
 1 -3 -10 3075.4 63.2 2
 -1 3 9 8966.8 129.7 1
 -1 3 9 9366.5 132.5 1
 1 -3 -9 8951.7 133.3 1
 1 -3 -9 9286 131.8 1
 1 -3 -9 9021.7 81.3 2
 -1 3 8 9847.3 128.9 1
 -1 3 8 9648.4 127.5 1
 1 -3 -8 9586.3 128.5 1
 1 -3 -8 9818.5 129.9 1
 1 -3 -8 9917.3 78.8 2
 -1 3 7 5399.9 101 1
 -1 3 7 5172.5 100.6 1
 1 -3 -7 5201.9 100.8 1
 1 -3 -7 5475.3 102.2 1
 1 -3 -7 5203.8 58.9 2
 -1 3 6 22.898 31.573 1
 -1 3 6 46.184 34.498 1
 1 -3 -6 43.044 31.958 1
 1 -3 -6 218.397 41.153 1
 1 -3 -6 111.004 22.765 2
 -1 3 5 299.806 38.477 1
 -1 3 5 294.009 38.039 1
 1 -3 -5 276.992 35.713 1
 1 -3 -5 249.607 35.201 1
 1 -3 -5 263.575 31.991 2
 -1 3 4 24224.4 159.3 1
 -1 3 4 24165.3 158.3 1
 -1 3 4 23476 99.1 2
 1 -3 -4 23464.2 155.4 1
 1 -3 -4 24656.4 160.7 1
 -1 3 3 2999 67.9 1
 -1 3 3 2806.4 44.3 2
 -1 3 3 2904.4 56.4 5
 1 -3 -3 3154.2 72.7 1
 1 -3 -3 3153.8 72.6 1
 1 -3 -3 2957.6 55.9 4
 -1 3 2 9950.3 99.9 1
 -1 3 2 9663.8 98.9 1
 -1 3 2 9663.7 70.6 2
 -1 3 2 9544.6 84 5
 1 -3 -2 9805.2 99.4 1
 1 -3 -2 9939.2 100 1
 1 -3 -2 9537.7 78.6 4
 -1 3 1 31482.6 159.7 1
 -1 3 1 30236.8 155.5 1
 -1 3 1 30363.7 141.6 5
 1 -3 -1 30563.5 156.8 1
 1 -3 -1 30963.6 157.7 1
 1 -3 -1 30798.3 121.6 4
 -1 3 0 51381.1 194.9 1
 -1 3 0 50239.5 192.4 1
 -1 3 0 49841.9 158.9 4
 -1 3 0 49383 181.5 5
 1 -3 0 50354.8 192.3 1
 1 -3 0 49678.9 143.7 4
 1 -3 0 49822.9 182.5 5
 -1 3 -1 3400.9 45.9 4
 -1 3 -1 3373.6 61.4 5
 1 -3 1 3512.5 63.4 1
 1 -3 1 3691.1 64.6 1
 1 -3 1 3415.6 46.5 4
 1 -3 1 3388.6 60.6 5
 -1 3 -2 3810.9 65.2 1
 -1 3 -2 3713.4 63.4 1
 -1 3 -2 3620.3 47.6 4
 -1 3 -2 3457 63.1 5
 1 -3 2 3741.6 63.8 1
 1 -3 2 3812.2 63.7 1
 1 -3 2 3509.2 47.7 4
 1 -3 2 3550.9 63.2 5
 -1 3 -3 13577.7 103.4 1
 -1 3 -3 13581.1 103.5 1
 -1 3 -3 12999.7 82.2 4
 -1 3 -3 13162.8 107.8 5
 1 -3 3 13371.4 102 1
 1 -3 3 13670.9 103.3 1
 1 -3 3 13287.9 83.8 4
 -1 3 -4 1027.2 49.2 1
 -1 3 -4 971.709 46.385 1
 -1 3 -4 921.626 39.229 4
 -1 3 -4 991.011 50.308 5
 1 -3 4 938.451 47.016 1
 1 -3 4 998.5 48.642 1
 1 -3 4 1003.5 50.6 5
 -1 3 -5 9952.5 95 1
 -1 3 -5 9836.4 93.2 1
 -1 3 -5 9907.2 86.9 4
 -1 3 -5 9875 103.1 5
 1 -3 5 9728.4 93.6 1
 1 -3 5 9987.5 95.4 1
 1 -3 5 9808.3 103.2 5
 -1 3 -6 20511 134.2 1
 -1 3 -6 20223.8 133.7 1
 -1 3 -6 19834.2 126.4 4
 -1 3 -6 20085.2 147.1 5
 1 -3 6 19903.9 132.1 1
 1 -3 6 20103 132.3 1
 1 -3 6 19927.5 146.6 5
 -1 3 -7 6061.5 85.9 1
 -1 3 -7 6045 86.4 1
 -1 3 -7 6068 84.9 4
 -1 3 -7 6001.1 94.9 5
 1 -3 7 6033.9 85.1 1
 1 -3 7 6167 85.3 1
 1 -3 7 6039 95.5 5
 -1 3 -8 1261.9 60.1 1
 -1 3 -8 1192.4 56.8 1
 -1 3 -8 1196.8 66.2 5
 1 -3 8 1157.1 58.2 1
 1 -3 8 1164.5 59.2 1
 1 -3 8 1170.3 64 5
 -1 3 -9 4126.7 82.7 1
 -1 3 -9 4113.2 79.2 1
 -1 3 -9 4192.6 91.1 5
 1 -3 9 4070.8 80.5 1
 1 -3 9 4002.9 80.4 1
 1 -3 9 3905.7 86.9 5
 -1 3 -10 208.166 37.942 1
 -1 3 -10 208.704 35.449 1
 -1 3 -10 203.106 36.45 5
 1 -3 10 260.638 35.917 1
 1 -3 10 214.167 35.376 1
 1 -3 10 164.2 34.244 5
 -1 3 -11 49.044 34.375 1
 -1 3 -11 155.641 35.442 1
 -1 3 -11 56.9 34.292 5
 1 -3 11 117.515 35.889 1
 1 -3 11 100.654 35.816 1
 1 -3 11 130.631 34.743 5
 -1 3 -12 881.4 71.628 1
 -1 3 -12 961.222 72.694 1
 -1 3 -12 979.248 75.537 5
 1 -3 12 877.73 68.479 1
 1 -3 12 931.407 72.608 1
 1 -3 12 1057.3 77.9 5
 -1 3 -13 28882.8 212.9 1
 -1 3 -13 28791.8 213.2 1
 1 -3 13 27777 207.2 1
 1 -3 13 28500.4 211.9 1
 1 -3 13 29036.5 225.5 5
 -1 3 -14 24258.1 207.5 1
 -1 3 -14 24484.2 208.3 1
 1 -3 14 22896.6 201.3 1
 1 -3 14 24197.3 207.9 1
 1 -3 14 24325.5 216.9 5
 -1 3 -15 794.233 66.508 1
 -1 3 -15 818.101 95.98 1
 1 -3 15 791.598 68.511 1
 1 -3 15 751.036 84.077 1
 1 -3 15 1020.6 95 5
 -1 3 -16 -27.793 51.541 1
 -1 3 -16 -31.346 50.678 1
 1 -3 16 -15.646 47.422 1
 1 -3 16 2.286 51.557 1
 1 -3 16 -13.569 51.406 3
 1 -3 16 52.142 46.899 5
 -1 3 -17 461.95 66.554 1
 -1 3 -17 513.559 67.92 1
 1 -3 17 307.867 59.7 1
 1 -3 17 583.084 67.682 1
 1 -3 17 335.594 64.747 3
 1 -3 17 327.18 95.376 5
 -1 3 -18 168.968 63.993 1
 -1 3 -18 101.354 62.48 1
 1 -3 18 222.17 61.106 1
 1 -3 18 126.28 61.385 1
 1 -3 18 107.884 62.93 3
 1 -3 18 52.091 53.226 5
 -1 3 -19 16.032 61.439 1
 -1 3 -19 -44.989 63.192 1
 1 -3 19 -70.662 57.8 1
 1 -3 19 -102.995 61.242 1
 1 -3 19 13.341 64.531 3
 1 -3 19 19.91 55.218 5
 -1 3 -20 146.905 71.151 1
 -1 3 -20 -17.796 74.158 1
 1 -3 20 147.172 70.429 1
 1 -3 20 77.608 74.411 1
 1 -3 20 72.3 72.018 3
 1 -3 20 265.655 64.07 5
 -1 3 -21 488.128 85.245 1
 -1 3 -21 259.2 88.629 1
 1 -3 21 339.648 75.846 1
 1 -3 21 349.27 86.582 1
 1 -3 21 292.65 77.927 3
 1 -3 21 455.132 72.233 5
 -1 2 21 218.47 110.264 1
 1 -2 -21 193.311 105.309 1
 1 -2 -21 170.012 96.201 1
 -1 2 20 84.203 85.488 1
 -1 2 20 -66.186 112.864 1
 -1 2 20 116.156 58.563 3
 -1 2 20 -12.7 59.149 5
 1 -2 -20 113.418 91.968 1
 1 -2 -20 209.208 93.958 1
 -1 2 19 168.385 80.132 1
 -1 2 19 -6.488 79.967 1
 -1 2 19 125.495 51.428 3
 -1 2 19 -41.1 52.992 5
 1 -2 -19 220.485 85.736 1
 1 -2 -19 168.198 153.736 1
 -1 2 18 479.681 85.2 1
 -1 2 18 521.395 91.114 1
 -1 2 18 455.857 53.446 3
 -1 2 18 462.807 56.178 5
 1 -2 -18 429.05 85.076 1
 1 -2 -18 544.652 89.446 1
 -1 2 17 155.787 71.375 1
 -1 2 17 291.18 77.774 1
 -1 2 17 157.049 45.742 3
 -1 2 17 112.015 51.198 5
 1 -2 -17 226.912 77.005 1
 1 -2 -17 145.444 74.23 1
 -1 2 16 142.468 64.118 1
 -1 2 16 123.143 69.24 1
 -1 2 16 -23.438 40.319 3
 -1 2 16 35.397 43.286 5
 1 -2 -16 111.61 67.48 1
 1 -2 -16 111.559 66.758 1
 -1 2 15 3695.2 134 1
 -1 2 15 3612.8 136 1
 -1 2 15 2802.2 74.1 3
 1 -2 -15 3406.2 130.3 1
 1 -2 -15 3475.2 136.8 1
 -1 2 14 441.23 69.765 1
 -1 2 14 360.121 66.26 1
 -1 2 14 345.281 40.329 3
 1 -2 -14 342.495 63.574 1
 1 -2 -14 387.725 64.483 1
 -1 2 13 55.402 52.794 1
 -1 2 13 -50.83 51.689 1
 1 -2 -13 28.292 49.58 1
 1 -2 -13 -63.304 49.518 1
 -1 2 12 -26.32 43.17 1
 -1 2 12 -46.148 47.196 1
 -1 2 12 12.372 26.312 3
 1 -2 -12 -40.655 46.01 1
 1 -2 -12 -59.921 46.751 1
 -1 2 11 2723.1 97.2 1
 -1 2 11 2660.8 101.4 1
 -1 2 11 2380.3 50.8 3
 1 -2 -11 2631.6 97.6 1
 1 -2 -11 2706.9 98.4 1
 -1 2 10 2920.6 91.3 1
 -1 2 10 2808 93.1 1
 -1 2 10 2587.8 47.3 3
 1 -2 -10 2715.6 91.5 1
 1 -2 -10 2861.9 91.7 1
 -1 2 9 1940.9 80.2 1
 -1 2 9 1761.8 78.7 1
 -1 2 9 1650.9 36.8 3
 1 -2 -9 1892.7 80.6 1
 1 -2 -9 1906.5 81.1 1
 -1 2 8 10893.4 125.6 1
 -1 2 8 10955.2 125.9 1
 1 -2 -8 11104.3 128.6 1
 1 -2 -8 11168 128.1 1
 -1 2 7 350.192 40.21 1
 -1 2 7 357.615 40.27 1
 1 -2 -7 354.895 42.184 1
 1 -2 -7 374.788 42.219 1
 1 -2 -7 420.346 43.91 2
 -1 2 6 58127.1 237.6 1
 -1 2 6 58481.9 238.2 1
 1 -2 -6 58554.9 239.1 1
 1 -2 -6 59132.6 240.2 1
 1 -2 -6 59517.8 171.5 2
 -1 2 5 16829 127.5 1
 -1 2 5 17199.8 130.1 1
 1 -2 -5 16559.8 127.7 1
 1 -2 -5 16961.4 128.3 1
 1 -2 -5 17219.1 90.7 2
 -1 2 4 74184.2 306.7 1
 -1 2 4 73014.7 237.5 1
 1 -2 -4 72136 302.9 1
 1 -2 -4 73045.7 269.8 1
 1 -2 -4 75372.7 274.6 2
 -1 2 1 2469.1 56.7 1
 -1 2 1 2315.7 55 1
 -1 2 1 2134.9 44.2 2
 -1 2 1 2241.3 50.5 5
 1 -2 -1 2370.3 55.5 1
 1 -2 -1 2436.3 55.3 1
 1 -2 -1 2468.6 34 3
 1 -2 -1 2395.5 35.9 4
 -1 2 0 397163 1092 1
 -1 2 0 386890 1102 1
 -1 2 0 385549 1124 5
 1 -2 0 400751 1126 1
 1 -2 0 392936 1128 1
 1 -2 0 413530 915 3
 -1 2 -1 218654 770 1
 -1 2 -1 210598 742 1
 -1 2 -1 212173 494 4
 -1 2 -1 209400 798 5
 1 -2 1 214088 728 1
 1 -2 1 219608 765 1
 1 -2 1 209887 491 4
 1 -2 1 204346 780 5
 -1 2 -2 54.698 21.809 1
 -1 2 -2 59.759 21.341 1
 -1 2 -2 41.217 15.299 4
 -1 2 -2 20.093 18.218 5
 1 -2 2 46.252 20.883 1
 1 -2 2 58.892 20.718 1
 1 -2 2 26.921 20.18 5
 -1 2 -3 20143.7 100.2 1
 -1 2 -3 19791.4 98.9 1
 -1 2 -3 19273.4 85.4 4
 -1 2 -3 19575.7 114.6 5
 1 -2 3 19916.5 99.2 1
 1 -2 3 19803.2 99.3 1
 1 -2 3 19018 112.1 5
 -1 2 -4 41031.2 144.1 1
 -1 2 -4 40385.3 142.8 1
 -1 2 -4 39535.5 164.5 5
 1 -2 4 40344.6 142.5 1
 1 -2 4 39776.4 141.2 1
 1 -2 4 39663.5 164.5 5
 -1 2 -5 29709.4 130.1 1
 -1 2 -5 30115.9 131.3 1
 -1 2 -5 29277.5 149.3 5
 1 -2 5 29418.8 129.5 1
 1 -2 5 29092.4 128.2 1
 1 -2 5 29539.9 149.9 5
 -1 2 -6 3223.9 57.9 1
 -1 2 -6 3242.3 65.5 5
 1 -2 6 3180.1 57 1
 1 -2 6 3153.1 57.4 1
 1 -2 6 3219.2 65.5 5
 -1 2 -7 7650.9 82.5 1
 -1 2 -7 7799.7 82.5 1
 -1 2 -7 7807.7 94.3 5
 1 -2 7 7490.9 81.2 1
 1 -2 7 7758.4 82.2 1
 1 -2 7 7514.9 92.1 5
 -1 2 -8 22768.1 139.3 1
 -1 2 -8 22682 138.6 1
 -1 2 -8 22906.7 155 5
 1 -2 8 22255.9 136.9 1
 1 -2 8 22609.7 137.6 1
 1 -2 8 22301.8 152.5 5
 -1 2 -9 2676.1 68.1 1
 -1 2 -9 2698.7 67.8 1
 -1 2 -9 2712.5 73.9 5
 1 -2 9 2704.9 66.5 1
 1 -2 9 2594.7 66.7 1
 1 -2 9 2641.6 71 5
 -1 2 -10 1933 66.1 1
 -1 2 -10 2127.4 67.7 1
 -1 2 -10 1938.9 70 5
 1 -2 10 1974.2 64.4 1
 1 -2 10 1999.6 67.3 1
 1 -2 10 2028.5 69.7 5
 -1 2 -11 4875.6 89.5 1
 -1 2 -11 5090.6 90.4 1
 -1 2 -11 4928.9 93 5
 1 -2 11 4791.5 87.9 1
 1 -2 11 4957.2 90.7 1
 1 -2 11 5019.2 93.7 5
 -1 2 -12 2250.4 78.9 1
 -1 2 -12 2255 77.4 1
 1 -2 12 2079.4 74.7 1
 1 -2 12 2250.9 79.9 1
 1 -2 12 2045.4 78.6 3
 1 -2 12 2262.9 80.6 5
 -1 2 -13 7326.8 117.7 1
 -1 2 -13 7264.6 117.5 1
 1 -2 13 6738.2 114.1 1
 1 -2 13 7337.7 117.8 1
 1 -2 13 6675.9 119.9 3
 1 -2 13 7258.5 119.2 5
 -1 2 -14 4153 109.7 1
 -1 2 -14 4081.6 112.4 1
 1 -2 14 3698.2 107.1 1
 1 -2 14 4005.2 111.2 1
 1 -2 14 3670.5 107.8 3
 1 -2 14 4218.7 108.9 5
 -1 2 -15 8428 140.7 1
 -1 2 -15 8445.8 141.7 1
 1 -2 15 8067.4 137.7 1
 1 -2 15 8356.5 141.8 1
 1 -2 15 7603.7 139.7 3
 1 -2 15 8315.2 140.2 5
 -1 2 -16 1727.6 121.5 1
 -1 2 -16 1827.9 108.8 1
 1 -2 16 1724.6 100.7 1
 1 -2 16 1516.3 102.2 1
 1 -2 16 1607.8 101.3 3
 1 -2 16 1818.3 101.5 5
 -1 2 -17 812.344 99.973 1
 -1 2 -17 670.765 71.086 1
 1 -2 17 635.566 67.876 1
 1 -2 17 619.888 66.679 1
 1 -2 17 652.674 74.079 3
 1 -2 17 558.386 58.86 5
 -1 2 -18 2290.3 119.9 1
 -1 2 -18 2248.8 126 1
 1 -2 18 2122.4 116.8 1
 1 -2 18 2307.1 125.8 1
 1 -2 18 1908.1 107.7 3
 1 -2 18 2063.2 114 5
 -1 2 -19 938.664 116.919 1
 -1 2 -19 529.146 78.393 1
 1 -2 19 546.203 72.971 1
 1 -2 19 582.958 77.59 1
 1 -2 19 484.598 73.639 3
 1 -2 19 631.264 65.654 5
 -1 2 -20 170.27 69.211 1
 -1 2 -20 267.017 80.022 1
 1 -2 20 188.09 71.568 1
 1 -2 20 269.285 76.894 1
 1 -2 20 124.749 68.28 3
 1 -2 20 236.435 60.086 5
 -1 2 -21 -54.511 75.142 1
 -1 2 -21 -42.943 86.993 1
 1 -2 21 37.393 74.163 1
 1 -2 21 6.048 80.058 1
 1 -2 21 122.896 72.709 3
 1 -2 21 185.124 63.383 5
 -1 1 21 140.83 95.987 1
 -1 1 21 8.67 91.848 1
 -1 1 21 76.312 68.778 3
 -1 1 21 -132.625 61.85 5
 1 -1 -21 -121.122 90.82 1
 1 -1 -21 -127.643 99.937 1
 -1 1 20 178 89.015 1
 -1 1 20 480.243 98.912 1
 -1 1 20 226.057 63.816 3
 -1 1 20 30.142 106.315 5
 1 -1 -20 264.487 94.742 1
 1 -1 -20 168.433 94.168 1
 -1 1 19 315.003 83.497 1
 -1 1 19 515.983 84.553 1
 -1 1 19 428.372 63.155 3
 -1 1 19 363.18 62.009 5
 1 -1 -19 450.133 90.32 1
 1 -1 -19 559.303 94.396 1
 -1 1 18 -11.503 73.588 1
 -1 1 18 133.186 76.165 1
 -1 1 18 72.73 53.578 3
 -1 1 18 34.816 51.942 5
 1 -1 -18 6.387 76.644 1
 1 -1 -18 74.877 74.465 1
 -1 1 17 1100.8 123.8 1
 -1 1 17 889.496 85.618 1
 -1 1 17 927.488 79.52 3
 -1 1 17 1140.7 100 5
 1 -1 -17 1207 133.7 1
 1 -1 -17 1322.5 135.6 1
 -1 1 16 3910.6 139.6 1
 -1 1 16 3842.3 137.5 1
 -1 1 16 3315.4 88.1 3
 -1 1 16 3574.3 112.2 5
 1 -1 -16 3971.5 142 1
 1 -1 -16 4113.9 146.3 1
 -1 1 15 663.471 72.738 1
 -1 1 15 635.175 68.774 1
 -1 1 15 628.31 64.427 3
 -1 1 15 791.046 86.365 5
 1 -1 -15 678.04 73.722 1
 -1 1 14 11.464 51.706 1
 -1 1 14 -5.498 52.11 1
 1 -1 -14 71.433 54.243 1
 1 -1 -14 70.233 55.506 1
 -1 1 13 1576.5 97.1 1
 -1 1 13 1655.1 99 1
 1 -1 -13 1781.7 98.1 1
 1 -1 -13 1801 104 1
 -1 1 12 1407.4 88.5 1
 -1 1 12 1529.1 88 1
 1 -1 -12 1368.4 87.4 1
 1 -1 -12 1525.4 89 1
 -1 1 11 594.829 54.07 1
 -1 1 11 551.38 54.076 1
 1 -1 -11 666.277 56.668 1
 1 -1 -11 708.193 77.612 1
 -1 1 10 1528.5 78 1
 -1 1 10 1435.7 77.9 1
 1 -1 -10 1361.8 80.6 1
 1 -1 -10 1506.1 77.1 1
 -1 1 9 26943.1 185.3 1
 -1 1 9 26474.2 183.4 1
 1 -1 -9 26454.3 184 1
 1 -1 -9 27033.7 185 1
 -1 1 8 5129.7 92.9 1
 -1 1 8 4790.2 91.9 1
 1 -1 -8 4857.8 91.6 1
 1 -1 -8 5071.1 91.3 1
 -1 1 7 4032.7 81.7 1
 -1 1 7 3672.7 81.6 1
 1 -1 -7 3632.7 79.8 1
 1 -1 -7 3779.3 78.1 1
 -1 1 6 54332.2 215 1
 -1 1 6 52504.1 211 1
 1 -1 -6 52586.2 211.5 1
 1 -1 -6 53544 212.7 1
 -1 1 5 48442.8 190.9 1
 -1 1 5 46833.7 186.9 1
 1 -1 -5 47324 188.8 1
 1 -1 -5 48009.1 189.9 1
 -1 1 4 52720.7 184.2 1
 -1 1 4 51101 181 1
 1 -1 -4 51648.3 182.8 1
 1 -1 -4 52776.2 184.7 1
 1 -1 -4 52429.2 153.2 2
 -1 1 3 142411 612 1
 -1 1 3 141223 603 1
 -1 1 3 140936 296 3
 1 -1 -3 140573 560 1
 1 -1 -3 146209 584 1
 1 -1 -3 141062 518 2
 -1 1 2 140135 557 1
 -1 1 2 138467 556 1
 -1 1 2 135911 495 2
 -1 1 2 138649 336 3
 1 -1 -2 138771 552 1
 1 -1 -2 140785 563 1
 1 -1 -2 139021 517 2
 1 -1 -2 148470 385 3
 -1 1 1 16112.9 78.9 1
 -1 1 1 15447.6 77.2 1
 -1 1 1 15576.1 76.9 2
 -1 1 1 16387 66.9 3
 1 -1 -1 15996.1 79 1
 1 -1 -1 15828.1 77.8 1
 1 -1 -1 16589 64.1 3
 -1 1 0 8154.9 52.3 1
 -1 1 0 6818.5 48.3 1
 1 -1 0 7029.4 50 1
 1 -1 0 6904.1 49.8 1
 1 -1 0 6884.6 55.4 2
 1 -1 0 6971.3 48.5 3
 -1 1 -1 161813 458 1
 -1 1 -1 158635 455 1
 -1 1 -1 152928 580 5
 1 -1 1 157727 446 1
 1 -1 1 165240 538 3
 -1 1 -2 12015.2 54.2 1
 -1 1 -2 11845.8 53.5 1
 -1 1 -2 11447.7 73.4 5
 1 -1 2 11741 53.6 1
 1 -1 2 12188.4 76.8 3
 1 -1 2 11239.9 73.5 5
 -1 1 -3 727.819 30.035 1
 -1 1 -3 760.496 30.625 1
 -1 1 -3 809.355 40.18 5
 1 -1 3 737.539 29.531 1
 1 -1 3 888.357 39.681 3
 1 -1 3 788.571 37.988 5
 -1 1 -4 29961.6 98.6 1
 -1 1 -4 30640.9 99.9 1
 -1 1 -4 29617.5 123.8 5
 1 -1 4 27816.1 117.8 1
 1 -1 4 30288.4 98.6 1
 1 -1 4 31311.6 136.3 3
 1 -1 4 29142.2 122.4 5
 -1 1 -5 29169.9 109.6 1
 -1 1 -5 30276.6 111.7 1
 -1 1 -5 29925.5 131.4 5
 1 -1 5 29387.9 109.6 1
 1 -1 5 29577.6 109.9 1
 1 -1 5 30453.1 143.8 3
 1 -1 5 29358.6 130.2 5
 -1 1 -6 83402.2 264.7 1
 -1 1 -6 84584.4 250.3 1
 -1 1 -6 82248.4 320.7 5
 1 -1 6 83851.8 271.6 1
 1 -1 6 81431.5 258.8 3
 1 -1 6 82174.7 273.5 5
 -1 1 -7 10694.1 86.8 1
 -1 1 -7 11001.4 87.2 1
 -1 1 -7 10622 94 5
 1 -1 7 10908.5 86.9 1
 1 -1 7 10767.4 100.5 3
 1 -1 7 10534.6 93.4 5
 -1 1 -8 18010 117.4 1
 -1 1 -8 18460 119 1
 -1 1 -8 18266.3 125.6 5
 1 -1 8 18197.6 118 1
 1 -1 8 18166.3 118.1 1
 1 -1 8 17711.5 132.9 3
 1 -1 8 17958.4 124.1 5
 -1 1 -9 67433.4 233.2 1
 -1 1 -9 69455.4 236.9 1
 -1 1 -9 66296.6 239.5 5
 1 -1 9 67660.7 232.7 1
 1 -1 9 67506.6 232.3 1
 1 -1 9 67531.4 264.1 3
 1 -1 9 66526.2 240.1 5
 -1 1 -10 8973.8 101.8 1
 -1 1 -10 9109.4 103.1 1
 -1 1 -10 8899 101.3 5
 1 -1 10 9020.7 101.7 1
 1 -1 10 9112.9 101.7 1
 1 -1 10 9046.2 111.2 3
 1 -1 10 8801.4 101.3 5
 -1 1 -11 155.254 32.719 1
 -1 1 -11 147.05 33.969 1
 1 -1 11 138.674 35.788 1
 1 -1 11 159.429 35.386 1
 1 -1 11 197.046 39.487 3
 1 -1 11 171.502 30.806 5
 -1 1 -12 332.071 41.903 1
 -1 1 -12 336.017 40.946 1
 1 -1 12 369.916 42.221 1
 1 -1 12 358.468 41.686 1
 1 -1 12 372.959 46.412 3
 1 -1 12 361.656 36.54 5
 -1 1 -13 181.247 42.168 1
 -1 1 -13 111.566 41.674 1
 1 -1 13 159.705 42.34 1
 1 -1 13 223.118 43.375 1
 1 -1 13 170.877 43.25 3
 1 -1 13 180.751 35.403 5
 -1 1 -14 13719.7 154.3 1
 -1 1 -14 13862.9 156.8 1
 1 -1 14 13626.9 155.2 1
 1 -1 14 13305.2 152.6 1
 1 -1 14 12403.6 153.1 3
 1 -1 14 12822.4 144.7 5
 -1 1 -15 9489.1 141.8 1
 -1 1 -15 10001.6 148 1
 1 -1 15 9969.1 147.4 1
 1 -1 15 9690.2 145.9 1
 1 -1 15 8799.7 141.5 3
 1 -1 15 9231.2 133 5
 -1 1 -16 4099.1 169.5 1
 -1 1 -16 4987.6 131.2 1
 1 -1 16 4941.4 127.7 1
 1 -1 16 4769.4 128.1 1
 1 -1 16 4267.9 118.7 3
 1 -1 16 4605.9 114.4 5
 -1 1 -17 194.278 59.449 1
 -1 1 -17 264.957 64.615 1
 1 -1 17 293.522 63.601 1
 1 -1 17 193.07 60.903 3
 1 -1 17 212.126 48.333 5
 -1 1 -18 126.688 59.385 1
 -1 1 -18 220.671 68.238 1
 1 -1 18 252.761 63.797 1
 1 -1 18 142.378 63.676 3
 1 -1 18 151.329 48.722 5
 -1 1 -19 396.369 69.124 1
 -1 1 -19 233.472 73.61 1
 1 -1 19 263.903 71.576 1
 1 -1 19 290.976 70.176 3
 1 -1 19 257.148 51.183 5
 -1 1 -20 158.221 73.142 1
 -1 1 -20 230.564 78.899 1
 1 -1 20 -94.733 68.22 1
 1 -1 20 26.701 68.004 3
 1 -1 20 174.811 65.399 5
 -1 1 -21 62.402 77.255 1
 -1 1 -21 153.829 86.081 1
 1 -1 21 19.48 68.361 1
 1 -1 21 79.297 79.199 1
 1 -1 21 4.956 73.907 3
 1 -1 21 125.355 58.325 5
 -1 0 21 317.949 96.933 1
 -1 0 21 307.12 108.879 1
 -1 0 21 354.261 74.187 3
 -1 0 21 277.181 73.184 5
 1 0 -21 482.43 104.355 1
 1 0 -21 552.888 110.272 1
 -1 0 20 -178.914 79.279 1
 -1 0 20 -53.942 85.847 1
 -1 0 20 101.749 63.604 3
 -1 0 20 -32.289 60.149 5
 1 0 -20 89.178 82.257 1
 1 0 -20 2.908 110.365 1
 -1 0 19 399.698 83.864 1
 -1 0 19 319.821 88.968 1
 -1 0 19 286.081 62.776 3
 -1 0 19 302.596 72.118 5
 1 0 -19 433.946 83.524 1
 1 0 -19 394.94 89.164 1
 -1 0 18 7293.8 181.1 1
 -1 0 18 7519.4 181.3 1
 -1 0 18 6626.4 150.9 5
 1 0 -18 7192.5 181.2 1
 1 0 -18 7717.6 187.4 1
 -1 0 17 1172.1 125.5 1
 -1 0 17 1189 128.2 1
 -1 0 17 1231.9 106.5 5
 1 0 -17 1076.6 128.5 1
 1 0 -17 1021 95.6 1
 -1 0 16 -9.566 63.975 1
 -1 0 16 79.282 63.267 1
 -1 0 16 111.268 49.916 5
 1 0 -16 -20.888 61.562 1
 1 0 -16 108.271 69.368 1
 -1 0 15 599.8 86.881 1
 -1 0 15 590.111 69.116 1
 -1 0 15 367.248 51.529 5
 1 0 -15 506.821 64.98 1
 1 0 -15 606.89 71.371 1
 -1 0 14 1054 101.5 1
 -1 0 14 714.499 64.614 1
 -1 0 14 793.437 81.977 5
 1 0 -14 805.036 99.552 1
 1 0 -14 754.298 67.088 1
 -1 0 13 198.679 50.446 1
 -1 0 13 113.006 48.696 1
 -1 0 13 131.407 37.175 5
 1 0 -13 174.646 48.412 1
 1 0 -13 256.156 51.148 1
 -1 0 12 3737 103.5 1
 -1 0 12 3761 102.3 1
 1 0 -12 3836.5 104 1
 1 0 -12 3851.8 104 1
 -1 0 11 575.933 71.633 1
 -1 0 11 507.023 52.024 1
 1 0 -11 633.343 71.1 1
 1 0 -11 525.029 51.072 1
 -1 0 10 9977.8 125.9 1
 -1 0 10 9713.3 123.6 1
 1 0 -10 9763.2 124.7 1
 1 0 -10 10082 125.7 1
 -1 0 9 18152.4 153 1
 -1 0 9 18009.4 151.7 1
 1 0 -9 17712.5 151.5 1
 1 0 -9 17783.9 150.6 1
 -1 0 8 6925.6 99.6 1
 -1 0 8 6930 98.4 1
 1 0 -8 6881.5 99.5 1
 -1 0 7 18786.8 136.7 1
 -1 0 7 18776.3 136.1 1
 1 0 -7 18901.1 137.5 1
 1 0 -7 19051.3 137.1 1
 -1 0 6 19963.9 131.2 1
 -1 0 6 19384.4 128.7 1
 1 0 -6 19512.7 130.1 1
 1 0 -6 19954.9 130.6 1
 -1 0 5 3367.1 63.2 1
 -1 0 5 3329 62.4 1
 1 0 -5 3333.2 63.4 1
 1 0 -5 3350.6 63.1 1
 -1 0 4 23122.3 119.9 1
 -1 0 4 23113.1 119.7 1
 1 0 -4 22807.7 119 1
 1 0 -4 23622.3 121.2 1
 -1 0 3 4008.7 59 1
 1 0 -3 3980.8 58 1
 1 0 -3 3981.4 58.4 1
 -1 0 2 149837 538 1
 -1 0 2 142511 530 1
 -1 0 2 141184 480 4
 1 0 -2 144698 534 1
 1 0 -2 143428 509 1
 1 0 -2 138889 491 4
 -1 0 1 87885.7 330 1
 -1 0 1 83862.5 323.6 1
 -1 0 1 86649.5 379.7 2
 -1 0 1 83092.2 309.2 4
 1 0 -1 86451.2 325 1
 1 0 -1 87488.1 342.3 1
 1 0 -1 84736.2 375.9 2
 1 0 -1 91177.7 320.8 3
 1 0 -1 83161.9 317 4
 -1 0 0 38036.7 144.3 1
 -1 0 0 37324.6 130.8 1
 -1 0 0 37241.5 211.9 2
 -1 0 0 36923.6 152.4 4
 1 0 0 37840.4 144.2 1
 1 0 0 38095.7 162 2
 1 0 0 39838.8 112.7 3
 1 0 0 37008 149 4
 -1 0 -1 186285 614 2
 -1 0 -1 187693 554 4
 1 0 1 187377 611 2
 1 0 1 197651 623 3
 1 0 1 185853 562 4
 -1 0 -2 51349.7 207.1 2
 -1 0 -2 49996.2 191.4 5
 1 0 2 53405.8 145.8 3
 -1 0 -3 4324.3 33.9 1
 -1 0 -3 4206.3 42.4 5
 1 0 3 4386.2 32.9 1
 1 0 3 4340.6 53.6 3
 1 0 3 4198.9 42.2 5
 -1 0 -4 463.634 27.238 1
 -1 0 -4 523.763 26.83 1
 -1 0 -4 490.859 27.318 5
 1 0 4 492.824 26.903 1
 1 0 4 554.26 34.397 3
 1 0 4 477.012 26.686 5
 -1 0 -5 56487.2 168.9 1
 -1 0 -5 58136.2 194.8 1
 -1 0 -5 55937.8 173.3 5
 1 0 5 56842.9 179.3 1
 1 0 5 54650.6 207.4 1
 1 0 5 57734.1 185.1 3
 1 0 5 53775.2 188 5
 -1 0 -6 6123.4 61.6 1
 -1 0 -6 6376.9 62 1
 -1 0 -6 6127.6 59.3 5
 1 0 6 6385 62.4 1
 1 0 6 6324.4 62.4 1
 1 0 6 6325.6 73.9 3
 1 0 6 5870.1 58.5 5
 -1 0 -7 54388.9 178.4 1
 -1 0 -7 54451.9 178.5 1
 -1 0 -7 53606.8 168.3 5
 1 0 7 54527.2 177.8 1
 1 0 7 53690.1 176.6 1
 1 0 7 52589.1 209.7 3
 1 0 7 52226.8 166.2 5
 -1 0 -8 21570.6 126.6 1
 -1 0 -8 22281.6 128.5 1
 1 0 8 22005.7 127.3 1
 1 0 8 21750.7 126.6 1
 1 0 8 21709.9 139.6 3
 1 0 8 20844 116 5
 -1 0 -9 17503.1 124.3 1
 -1 0 -9 17902.5 126.4 1
 1 0 9 17559.1 124.5 1
 1 0 9 16902.8 121.5 1
 1 0 9 17208.2 132.4 3
 1 0 9 16669.6 111.7 5
 -1 0 -10 2584.7 68.6 1
 -1 0 -10 2570.2 69.2 1
 1 0 10 2717.1 70.8 1
 1 0 10 2466.1 67.4 1
 1 0 10 2477.6 68.6 3
 1 0 10 2448.7 59.1 5
 -1 0 -11 4616 86.9 1
 -1 0 -11 4678.6 87.6 1
 1 0 11 4546.9 87.1 1
 1 0 11 4341.7 84.3 1
 1 0 11 4364.2 85.9 3
 1 0 11 4412 75.1 5
 -1 0 -12 6685.5 105.8 1
 -1 0 -12 6668.7 105.1 1
 1 0 12 6587.4 105.1 1
 1 0 12 6610.7 103.4 1
 1 0 12 6289.5 102.7 3
 1 0 12 6423.5 90.9 5
 -1 0 -13 273.388 44.133 1
 -1 0 -13 335.99 47.17 1
 1 0 13 307.149 45.981 1
 1 0 13 367.677 44.353 1
 1 0 13 332.573 47.579 3
 1 0 13 270.552 34.398 5
 -1 0 -14 593.344 56.706 1
 -1 0 -14 559.7 57.353 1
 1 0 14 575.78 55.416 1
 1 0 14 651.472 80.413 1
 1 0 14 479.164 55.13 3
 1 0 14 445.19 42.345 5
 -1 0 -15 -101.989 44.878 1
 -1 0 -15 41.927 49.698 1
 1 0 15 30.196 50.135 1
 1 0 15 86.664 45.586 1
 1 0 15 20.596 48.161 3
 1 0 15 -60.593 35.485 5
 -1 0 -16 4247.4 129.1 1
 -1 0 -16 4538 130.1 1
 1 0 16 4171.9 122.9 1
 1 0 16 4281.7 122.7 1
 1 0 16 3778 112.3 3
 1 0 16 3869.2 99.8 5
 -1 0 -17 2934.3 122.7 1
 -1 0 -17 3179 126.8 1
 1 0 17 3324.8 123.3 1
 1 0 17 2785.2 118 1
 1 0 17 2614.3 109 3
 1 0 17 2637.5 96.4 5
 -1 0 -18 1673.7 120.2 1
 -1 0 -18 1582.6 125.7 1
 1 0 18 1627.6 118.5 1
 1 0 18 1220.4 116.2 1
 1 0 18 1071.5 96.4 3
 1 0 18 1478 90.7 5
 -1 0 -19 -137.405 61.731 1
 -1 0 -19 2.621 69.695 1
 1 0 19 -47.047 62.889 1
 1 0 19 66.056 68.788 1
 1 0 19 -28.159 58.599 3
 1 0 19 95.032 47.131 5
 -1 0 -20 99.768 74.425 1
 -1 0 -20 135.532 79.634 1
 1 0 20 175.283 75.865 1
 1 0 20 155.454 75.109 1
 1 0 20 51.818 63.803 3
 1 0 20 152.45 50.782 5
 -1 0 -21 587.795 90.022 1
 -1 0 -21 765.226 99.831 1
 1 0 21 781.218 93.764 1
 1 0 21 574.636 94.525 1
 1 0 21 823.656 89.443 3
 1 0 21 590.944 62.862 5
 -1 -1 22 111.245 106.294 1
 -1 -1 22 141.432 75.892 3
 -1 -1 22 257.869 78.83 5
 1 1 -22 188.927 101.881 1
 1 1 -22 619.699 118.36 1
 -1 -1 21 2150 171.2 1
 -1 -1 21 1505.4 183.2 1
 -1 -1 21 1793 119.5 3
 -1 -1 21 1871.1 160.5 5
 1 1 -21 1533.2 166.7 1
 1 1 -21 2158.7 185.7 1
 -1 -1 20 220.784 93.269 1
 -1 -1 20 282.884 93.698 1
 -1 -1 20 126.215 68.974 5
 1 1 -20 280.957 87.355 1
 1 1 -20 380.549 104.557 1
 -1 -1 19 1247.7 146.5 1
 -1 -1 19 1268.3 151 1
 -1 -1 19 792.242 77.602 5
 1 1 -19 993.582 101.274 1
 1 1 -19 1008.8 103 1
 -1 -1 18 287.16 80.338 1
 -1 -1 18 482.398 83.764 1
 -1 -1 18 357.579 70.422 5
 1 1 -18 292.028 81.366 1
 1 1 -18 427.267 80.163 1
 -1 -1 17 601.148 76.411 1
 -1 -1 17 683.739 84.282 1
 -1 -1 17 503.487 63.561 5
 1 1 -17 707.827 82.39 1
 1 1 -17 739.96 86.903 1
 -1 -1 16 10661.8 181 1
 -1 -1 16 10873.3 181.5 1
 -1 -1 16 9729.4 162.1 5
 1 1 -16 10461.4 182.1 1
 1 1 -16 10571.9 182.6 1
 -1 -1 15 695.846 116.202 1
 -1 -1 15 774.737 72.591 1
 -1 -1 15 539.171 57.107 5
 1 1 -15 862.479 106.035 1
 1 1 -15 902.792 109.329 1
 -1 -1 14 1092.6 97.5 1
 -1 -1 14 1099.4 101.6 1
 -1 -1 14 1033.1 90.1 5
 1 1 -14 1166.1 99.5 1
 1 1 -14 1232.6 101.6 1
 -1 -1 13 348.32 52.156 1
 -1 -1 13 274.94 53.806 1
 -1 -1 13 234.082 43.416 5
 1 1 -13 314.155 48.681 1
 1 1 -13 295.565 52.034 1
 -1 -1 12 150.59 40.75 1
 -1 -1 12 152.551 45.309 1
 -1 -1 12 208.662 38.161 5
 1 1 -12 188.209 40.651 1
 1 1 -12 81.578 43.212 1
 -1 -1 11 3213.6 91.4 1
 -1 -1 11 3085 91.9 1
 -1 -1 11 3033.3 84.4 5
 1 1 -11 3119.1 91.1 1
 1 1 -11 3081.9 89.6 1
 -1 -1 10 1562.8 75.9 1
 -1 -1 10 1490.3 75.6 1
 1 1 -10 1627.3 75.3 1
 -1 -1 9 -29.27 33.644 1
 -1 -1 9 -40.882 31.184 1
 1 1 -9 -6.002 30.791 1
 1 1 -9 -35.58 32.33 1
 -1 -1 8 56817.9 243.6 1
 -1 -1 8 56507.1 243.3 1
 1 1 -8 56274.3 242.5 1
 1 1 -8 57145.4 244 1
 -1 -1 7 76709.5 265.6 1
 -1 -1 7 75375.6 263.4 1
 1 1 -7 74535.4 261.7 1
 1 1 -7 76159.4 264.6 1
 -1 -1 6 1213.3 55.2 1
 -1 -1 6 1085.1 54.4 1
 1 1 -6 1168.7 54.6 1
 1 1 -6 1141.1 53.5 1
 1 1 -6 1028.5 52.8 4
 -1 -1 5 68694.8 221.1 1
 1 1 -5 70155.7 223.3 1
 1 1 -5 65440.4 214.4 4
 -1 -1 4 18528 111.1 1
 -1 -1 4 17899.4 110.5 1
 -1 -1 4 17738.5 109.3 4
 1 1 -4 18174.4 111.5 1
 1 1 -4 18301.7 110.8 1
 1 1 -4 17737.8 109.5 4
 -1 -1 3 50153.9 185.4 1
 -1 -1 3 49415.6 164 4
 1 1 -3 50116.7 225 1
 1 1 -3 50504 206.5 1
 1 1 -3 48734.2 162.5 4
 -1 -1 1 13.988 20.517 1
 -1 -1 1 22.186 20.537 1
 -1 -1 1 19.119 19.071 4
 1 1 -1 13.11 18.73 1
 1 1 -1 -0.587 20.12 1
 1 1 -1 46.606 20.165 4
 -1 -1 0 2545.1 40.2 1
 -1 -1 0 2601.3 41.4 1
 -1 -1 0 2618.1 48.4 4
 1 1 0 2547.5 42.2 1
 1 1 0 2570.7 41.7 1
 1 1 0 2666.4 44.2 2
 1 1 0 2916.1 48.8 3
 1 1 0 2547.6 48.2 4
 -1 -1 -1 27336.1 89.8 1
 -1 -1 -1 27408.4 101.7 1
 -1 -1 -1 28591.3 96.4 2
 -1 -1 -1 28002.9 118.5 4
 1 1 1 27629.3 90.6 1
 1 1 1 26799.8 96.1 1
 1 1 1 28272.4 95.7 2
 1 1 1 29508.3 114.7 3
 1 1 1 27507.9 116.7 4
 -1 -1 -2 12694.8 64.9 1
 -1 -1 -2 13304.9 67.3 1
 -1 -1 -2 13103.3 66.7 2
 -1 -1 -2 13014.3 89.9 4
 1 1 2 13005.4 65.7 1
 1 1 2 12065.6 83 1
 1 1 2 13112.7 65.9 2
 1 1 2 13527.9 82.1 3
 -1 -1 -3 117608 412 1
 -1 -1 -3 120956 421 1
 -1 -1 -3 118873 412 2
 -1 -1 -3 114879 548 4
 1 1 3 117253 394 1
 1 1 3 115736 447 1
 1 1 3 122617 434 3
 -1 -1 -4 51.624 18.373 1
 -1 -1 -4 210.337 21.867 1
 -1 -1 -4 52.418 17.934 2
 1 1 4 66.038 18.836 1
 1 1 4 53.772 18.335 1
 1 1 4 53.97 21.618 3
 -1 -1 -5 2857.5 49.4 1
 -1 -1 -5 2990.1 49.2 1
 1 1 5 2845.8 48 1
 1 1 5 2898.6 47.3 1
 1 1 5 2834.6 50.5 3
 1 1 5 2719 28.5 5
 -1 -1 -6 8377.3 78 1
 -1 -1 -6 8103.6 75.2 1
 1 1 6 8289.7 76.2 1
 1 1 6 8224.9 75.8 1
 1 1 6 8240.2 78.7 3
 1 1 6 7770.3 49.1 5
 -1 -1 -7 6268.4 75.7 1
 -1 -1 -7 6366.7 76.1 1
 1 1 7 6348.4 75.1 1
 1 1 7 6245.5 74.9 1
 1 1 7 5951.9 87.3 3
 1 1 7 5997.6 51.1 5
 -1 -1 -8 37.699 26.051 1
 -1 -1 -8 23.189 26.321 1
 1 1 8 36.759 25.276 1
 1 1 8 35.664 26.079 1
 1 1 8 56.345 26.655 3
 1 1 8 55.344 16.131 5
 -1 -1 -9 5759 85.5 1
 -1 -1 -9 5927.3 86.4 1
 1 1 9 5743.1 84 1
 1 1 9 5840 86.1 1
 1 1 9 5657.9 78.9 3
 1 1 9 5509.9 60.3 5
 -1 -1 -10 7859.7 101.1 1
 -1 -1 -10 7992.2 101.8 1
 1 1 10 7716.5 99.2 1
 1 1 10 7650.8 99.7 1
 1 1 10 7434.9 93 3
 1 1 10 7099 71.9 5
 -1 -1 -11 54.123 33.821 1
 -1 -1 -11 70.242 35.715 1
 1 1 11 40.606 31.936 1
 1 1 11 44.584 33.727 1
 1 1 11 87.607 33.51 3
 1 1 11 46.533 22.215 5
 -1 -1 -12 3220.5 88.5 1
 -1 -1 -12 3316.8 90.5 1
 1 1 12 3310.1 87.7 1
 1 1 12 3203 88.1 1
 1 1 12 3150.9 77.8 3
 1 1 12 3093.9 63.7 5
 -1 -1 -13 706.696 77.026 1
 -1 -1 -13 490.639 50.661 1
 1 1 13 440.378 48.313 1
 1 1 13 497.432 52.127 1
 1 1 13 455.507 48.167 3
 1 1 13 502.449 52.789 5
 -1 -1 -14 41.406 45.982 1
 -1 -1 -14 24.756 44.246 1
 1 1 14 -5.851 42.177 1
 1 1 14 -31.03 44.265 1
 1 1 14 29.901 42.204 3
 1 1 14 -30.399 27.733 5
 -1 -1 -15 359.859 57.751 1
 -1 -1 -15 316.222 54.171 1
 1 1 15 341.934 56.783 1
 1 1 15 340.012 57.241 1
 1 1 15 315.522 51.466 3
 1 1 15 261.184 36.988 5
 -1 -1 -16 7.963 53.305 1
 -1 -1 -16 34.112 53.455 1
 1 1 16 47.89 53.614 1
 1 1 16 -59.502 47.669 1
 1 1 16 -37.622 45.975 3
 1 1 16 18.187 33.776 5
 -1 -1 -17 629.609 73.333 1
 -1 -1 -17 653.404 71.574 1
 1 1 17 649.686 69.013 1
 1 1 17 554.923 68.074 1
 1 1 17 593.094 64.325 3
 1 1 17 652.106 71.154 5
 -1 -1 -18 69.837 64.084 1
 -1 -1 -18 204.721 62.777 1
 1 1 18 113.869 61.285 1
 1 1 18 172.718 62.272 1
 1 1 18 118.848 56.896 3
 1 1 18 41.6 37.903 5
 -1 -1 -19 1142.4 131.8 1
 -1 -1 -19 1706.4 130.6 1
 1 1 19 1327.8 124.3 1
 1 1 19 1624.6 131.1 1
 1 1 19 1393.8 101.4 3
 1 1 19 1336.8 86.8 5
 -1 -1 -20 724.002 89.352 1
 -1 -1 -20 840.307 90.494 1
 1 1 20 645.941 83.911 1
 1 1 20 829.786 93.504 1
 1 1 20 998.59 106.75 3
 1 1 20 595.436 54.662 5
 -1 -1 -21 79.863 80.534 1
 -1 -1 -21 12.368 83.801 1
 1 1 21 -38.666 84.371 1
 1 1 21 68.849 72.331 3
 1 1 21 16.495 49.028 5
 -1 -2 22 -51.831 82.283 1
 -1 -2 22 275.294 108.714 1
 -1 -2 22 156.335 74.873 5
 1 2 -22 119.459 101.74 1
 1 2 -22 -4.113 105.01 1
 1 2 -22 179.076 103.15 4
 -1 -2 21 30.525 74.474 1
 -1 -2 21 24.123 93.768 1
 -1 -2 21 -65.703 68.823 5
 1 2 -21 -13.387 86.722 1
 1 2 -21 -134.106 94.843 1
 1 2 -21 161.521 88.304 4
 -1 -2 20 302.315 86.805 1
 -1 -2 20 251.365 78.78 1
 -1 -2 20 138.734 70.355 5
 1 2 -20 261.785 88.008 1
 1 2 -20 330.299 91.19 1
 1 2 -20 242.087 81.717 4
 -1 -2 19 1166.4 131.6 1
 -1 -2 19 590.525 91.231 1
 -1 -2 19 608.246 74.107 5
 1 2 -19 671.333 89.391 1
 1 2 -19 636.963 102.965 1
 1 2 -19 591.885 85.853 4
 -1 -2 18 7158.6 179.3 1
 -1 -2 18 7091.3 168.2 5
 1 2 -18 7471.3 180.2 1
 1 2 -18 7963.4 190.7 1
 -1 -2 17 8967 178.7 1
 -1 -2 17 8737.6 169.1 5
 1 2 -17 8913.9 181.8 1
 1 2 -17 9593.8 192.9 1
 -1 -2 16 2438.3 128.3 1
 -1 -2 16 2104.5 122 5
 1 2 -16 2300.2 130.1 1
 1 2 -16 2354.6 133.9 1
 -1 -2 15 23093.9 277.7 1
 -1 -2 15 24519.8 231.6 5
 1 2 -15 25155.3 239.9 1
 1 2 -15 26424.1 247 1
 -1 -2 14 26844.4 232.5 1
 -1 -2 14 26398.7 227.6 5
 1 2 -14 27194.7 236.2 1
 1 2 -14 27776.6 238.4 1
 -1 -2 13 2075.3 98.8 1
 -1 -2 13 1906.9 94.7 5
 1 2 -13 2002 97.8 1
 1 2 -13 1857 94.9 1
 1 2 -13 1915.8 99 4
 -1 -2 12 3544.4 101.9 1
 -1 -2 12 3442 98.2 5
 1 2 -12 3555.4 101.9 1
 1 2 -12 3484.8 99.7 1
 1 2 -12 3253 99.8 4
 -1 -2 11 106.088 39.458 1
 -1 -2 11 96.088 35.013 5
 1 2 -11 123.448 40.816 1
 1 2 -11 107.611 36.755 1
 1 2 -11 80.998 38.974 4
 -1 -2 10 1872.8 77.3 1
 -1 -2 10 2021.1 77.9 5
 1 2 -10 1799.6 78.3 1
 1 2 -10 2105.7 79.4 1
 1 2 -10 1907.9 78.1 4
 -1 -2 9 2529.2 78.5 1
 -1 -2 9 2587.8 77.2 5
 1 2 -9 2606.9 80.1 1
 1 2 -9 2607.6 80.7 1
 1 2 -9 2554.6 79.4 4
 -1 -2 8 5833.7 96.4 1
 -1 -2 8 5993.3 95.8 5
 1 2 -8 5638.5 96.5 1
 1 2 -8 5745.6 96.7 1
 1 2 -8 5520.2 96.3 4
 -1 -2 7 18745.2 144.7 1
 -1 -2 7 18581.5 143.3 1
 -1 -2 7 18475.2 143.3 5
 1 2 -7 18489.8 144.4 1
 1 2 -7 18906.5 145.2 1
 1 2 -7 17792.8 141.7 4
 -1 -2 6 67.343 23.912 1
 -1 -2 6 4.627 27.657 1
 -1 -2 6 23.71 23.065 5
 1 2 -6 -6.556 25.405 1
 1 2 -6 -4.534 25.783 1
 1 2 -6 -0.36 25.132 4
 -1 -2 5 6436.6 84.3 1
 -1 -2 5 6648.9 84.8 1
 -1 -2 5 6475.8 83.7 4
 1 2 -5 6536.3 85.3 1
 1 2 -5 6583 83.9 1
 1 2 -5 6350.6 83.3 4
 -1 -2 4 47356.8 188.6 1
 -1 -2 4 48729.7 191.1 1
 -1 -2 4 47446.8 190 4
 1 2 -4 47512.2 189.1 1
 -1 -2 3 35654.9 157.6 1
 -1 -2 3 36436.9 158.9 1
 -1 -2 3 35066.9 159.5 4
 1 2 -3 35372.4 156.2 1
 1 2 -3 36069.3 158.9 1
 1 2 -3 35471.1 159.5 4
 -1 -2 2 57124.9 187.8 1
 -1 -2 2 57494.8 188.1 1
 -1 -2 2 55332.6 192.3 4
 1 2 -2 56076.4 211.8 1
 1 2 -2 57541.3 214.6 1
 1 2 -2 55263.6 191.9 4
 -1 -2 1 472175 1306 1
 -1 -2 1 479709 1310 1
 -1 -2 1 454334 1348 4
 1 2 -1 474624 1305 1
 1 2 -1 463694 1267 1
 1 2 -1 462400 1382 4
 1 2 0 689837 1750 4
 -1 -2 -1 189830 707 1
 -1 -2 -1 190164 711 1
 -1 -2 -1 191963 760 4
 -1 -2 -1 188307 548 5
 1 2 1 191218 708 1
 1 2 1 187950 677 1
 1 2 1 199061 602 2
 -1 -2 -2 8186.8 73.6 1
 -1 -2 -2 8617.5 77 1
 -1 -2 -2 8304.8 86.9 4
 -1 -2 -2 8378.1 45.1 5
 1 2 2 8231.6 74.4 1
 1 2 2 8348.2 75.4 1
 1 2 2 8229.3 54.9 2
 1 2 2 8724.1 75.3 3
 1 2 2 8072.8 86 4
 -1 -2 -3 28767.9 130 1
 -1 -2 -3 28695.7 129.3 1
 -1 -2 -3 28618.7 154.4 4
 1 2 3 28860.4 129.9 1
 1 2 3 28781.4 129.3 1
 1 2 3 28837.7 86.8 2
 1 2 3 29817.5 128.4 3
 -1 -2 -4 3895 61.5 1
 -1 -2 -4 4037.9 62.7 1
 -1 -2 -4 3778.8 71 4
 1 2 4 3902.9 62 1
 1 2 4 4029.6 62.3 1
 1 2 4 4030.9 57.6 3
 -1 -2 -5 1291.2 49.4 1
 -1 -2 -5 1309.8 50 1
 -1 -2 -5 1352.4 58 4
 1 2 5 1329.5 49.1 1
 1 2 5 1317.3 50.4 1
 1 2 5 1311.1 44.3 3
 -1 -2 -6 1604.6 55.2 1
 -1 -2 -6 1677.5 56.2 1
 1 2 6 1631.1 55.9 1
 1 2 6 1618.2 54.4 1
 1 2 6 1678 48.9 3
 -1 -2 -7 1506.8 58.8 1
 -1 -2 -7 1592.8 61.1 1
 1 2 7 1562.7 57.6 1
 1 2 7 1498.6 57.6 1
 1 2 7 1531.3 49.2 3
 -1 -2 -8 50.577 30.536 1
 -1 -2 -8 41.857 30.276 1
 1 2 8 32.352 29.8 1
 1 2 8 42.185 28.958 1
 1 2 8 76.553 31.608 3
 -1 -2 -9 2619.1 74.6 1
 -1 -2 -9 2679.8 74.4 1
 1 2 9 2508.9 71.8 1
 1 2 9 2478.4 73.2 1
 1 2 9 2438.6 60.7 3
 -1 -2 -10 939.901 66.596 1
 -1 -2 -10 994.809 67.031 1
 1 2 10 900.781 63.854 1
 1 2 10 1006.8 67.4 1
 1 2 10 941.503 53.826 3
 1 2 10 909.47 31.32 5
 -1 -2 -11 439.673 47.195 1
 -1 -2 -11 450.435 48.2 1
 1 2 11 411.969 44.737 1
 1 2 11 393.384 46.207 1
 1 2 11 399.493 41.607 3
 1 2 11 450.091 33.701 5
 -1 -2 -12 37.176 42.716 1
 -1 -2 -12 51.645 39.873 1
 1 2 12 -19.809 38.815 1
 1 2 12 82.137 43.462 1
 1 2 12 4.447 36.257 3
 1 2 12 31.067 19.681 5
 -1 -2 -13 2062.1 95.4 1
 -1 -2 -13 2231.7 94.6 1
 1 2 13 2097.6 92.6 1
 1 2 13 2261.3 98.7 1
 1 2 13 2021.3 75.4 3
 1 2 13 2011.8 51.4 5
 -1 -2 -14 600.433 60.908 1
 -1 -2 -14 490.482 56.962 1
 1 2 14 432.943 95.634 1
 1 2 14 466.146 62.073 1
 1 2 14 421.049 51.58 3
 1 2 14 480.712 47.322 5
 -1 -2 -15 -11.263 52.692 1
 -1 -2 -15 -21.851 51.246 1
 1 2 15 -75.725 48.808 1
 1 2 15 -44.279 52.674 1
 1 2 15 18.733 44.736 3
 1 2 15 -13.438 24.458 5
 -1 -2 -16 14.25 55.809 1
 -1 -2 -16 5.625 56.109 1
 1 2 16 -86.396 51.201 1
 1 2 16 -1.991 56.578 1
 1 2 16 25.579 49.487 3
 1 2 16 -14.86 27.727 5
 -1 -2 -17 -0.44 60.566 1
 -1 -2 -17 13.106 61.722 1
 1 2 17 -144.133 56.594 1
 1 2 17 -121.472 62.106 1
 1 2 17 20.053 52.522 3
 1 2 17 -4.225 29.751 5
 -1 -2 -18 -46.926 62.888 1
 -1 -2 -18 190.982 72.015 1
 1 2 18 -49.038 60.015 1
 1 2 18 -102.891 60.454 1
 1 2 18 70.127 56.8 3
 1 2 18 -65.802 32.197 5
 -1 -2 -19 96.059 79.862 1
 -1 -2 -19 158.549 74.288 1
 1 2 19 33.683 69.126 1
 1 2 19 97.405 72.845 1
 1 2 19 198.004 65.927 3
 1 2 19 125.532 35.391 5
 -1 -2 -20 156.795 86.905 1
 -1 -2 -20 -69.924 84.487 1
 1 2 20 -24.153 71.6 1
 1 2 20 116.616 80.19 1
 1 2 20 84.166 69.339 3
 1 2 20 -15.405 37.627 5
 -1 -3 21 24.855 88.354 1
 -1 -3 21 58.736 86.424 1
 -1 -3 21 184.359 74.039 5
 1 3 -21 -1.807 90.845 1
 1 3 -21 140.9 102.338 1
 1 3 -21 36.669 81.486 4
 -1 -3 20 19.143 80.551 1
 -1 -3 20 6.362 81.447 1
 -1 -3 20 52.111 67.277 5
 1 3 -20 -157.88 75.279 1
 1 3 -20 -52.773 82.421 1
 1 3 -20 -23.909 69.758 4
 -1 -3 19 486.321 85.586 1
 -1 -3 19 616.682 86.29 1
 -1 -3 19 558.957 76.417 5
 1 3 -19 356.855 83.126 1
 1 3 -19 520.596 97.919 1
 1 3 -19 433.369 78.435 4
 -1 -3 18 3182.4 147.9 1
 -1 -3 18 2941.1 151.3 1
 -1 -3 18 3377.9 148.1 5
 1 3 -18 2825.4 152.6 1
 1 3 -18 2913.4 155.8 1
 1 3 -18 3345.2 152 4
 -1 -3 17 129.581 64.846 1
 -1 -3 17 274.355 68.22 1
 -1 -3 17 252.098 64.24 5
 1 3 -17 247.434 75.714 1
 1 3 -17 281.706 78.36 1
 1 3 -17 337.31 64.343 4
 -1 -3 16 2992.5 130.5 1
 -1 -3 16 3150.7 136.2 1
 -1 -3 16 2844.1 132.6 5
 1 3 -16 3072.8 139.9 1
 1 3 -16 3113.3 140.8 1
 1 3 -16 3284.9 132.6 4
 -1 -3 15 624.026 71.188 1
 -1 -3 15 661.629 73.345 1
 -1 -3 15 483.274 67.538 5
 1 3 -15 423.042 117.349 1
 1 3 -15 643.363 71.178 1
 1 3 -15 660.763 66.88 4
 -1 -3 14 6077.3 139.4 1
 -1 -3 14 6243 144.1 1
 -1 -3 14 5841.9 139.7 5
 1 3 -14 6314.3 145.6 1
 1 3 -14 6135.2 143.1 1
 1 3 -14 6435.9 142 4
 -1 -3 13 563.041 57.2 1
 -1 -3 13 525.311 59.832 1
 -1 -3 13 378.151 54.882 5
 1 3 -13 598.305 60.269 1
 1 3 -13 640.579 61.705 1
 1 3 -13 761.357 91.014 4
 -1 -3 12 2448.5 98.2 1
 -1 -3 12 2394.3 95.7 1
 -1 -3 12 2241.1 96.2 5
 1 3 -12 2271.5 98.5 1
 1 3 -12 2318.5 96.6 1
 1 3 -12 2317.1 96.7 4
 -1 -3 11 315.525 44.012 1
 -1 -3 11 394.655 49.468 1
 -1 -3 11 319.347 43.125 5
 1 3 -11 366.285 50.06 1
 1 3 -11 346.397 45.709 1
 1 3 -11 281.267 40.714 4
 -1 -3 10 421.165 48.119 1
 -1 -3 10 315.07 40.6 1
 -1 -3 10 378.413 42.968 5
 1 3 -10 357.506 45.033 1
 1 3 -10 284.382 41.174 1
 1 3 -10 250.933 37.973 4
 -1 -3 9 8500.5 120 1
 -1 -3 9 8867.5 121.5 1
 -1 -3 9 9033.8 123.2 5
 1 3 -9 8648.9 121.7 1
 1 3 -9 8535.6 118.4 1
 1 3 -9 8794.9 121.4 4
 -1 -3 8 847.437 64.949 1
 -1 -3 8 856.644 66.61 1
 -1 -3 8 987.566 67.032 5
 1 3 -8 882.242 66.981 1
 1 3 -8 847.445 64.428 1
 1 3 -8 821.973 66.586 4
 -1 -3 7 84997.2 313 1
 -1 -3 7 88398 319 1
 -1 -3 7 85533.7 312.3 4
 -1 -3 7 88662.2 318.8 5
 1 3 -7 86543.5 315.9 1
 1 3 -7 87508.3 317.6 1
 1 3 -7 86271.6 313.7 4
 -1 -3 6 165289 498 1
 -1 -3 6 166939 711 1
 -1 -3 6 167211 738 4
 -1 -3 6 167538 616 5
 1 3 -6 167162 605 1
 1 3 -6 165087 708 4
 -1 -3 5 19703.7 147.6 1
 -1 -3 5 19938.6 147.9 1
 -1 -3 5 19368.8 145.4 4
 -1 -3 5 19934.8 145.1 5
 1 3 -5 19704.6 146.8 1
 1 3 -5 19843 148.2 1
 1 3 -5 19157.3 143.8 4
 -1 -3 4 743.034 56.541 1
 -1 -3 4 779.682 55.164 1
 -1 -3 4 701.525 55.163 4
 -1 -3 4 917.46 54.317 5
 1 3 -4 675.289 53.578 1
 1 3 -4 741.516 57.086 1
 1 3 -4 611.985 53.166 4
 -1 -3 3 52188.9 215 1
 -1 -3 3 51893.3 214.3 1
 -1 -3 3 51867.6 215.6 4
 -1 -3 3 51571.6 201.4 5
 1 3 -3 51332.2 212.8 1
 1 3 -3 52498.2 215.4 1
 1 3 -3 51276.8 214.4 4
 -1 -3 2 17446 126.3 1
 -1 -3 2 17208 126.4 1
 -1 -3 2 17012.9 127.3 4
 -1 -3 2 17251.2 114.2 5
 1 3 -2 17380.7 126.8 1
 1 3 -2 16794.2 125.9 4
 -1 -3 1 2636.8 61.7 1
 -1 -3 1 2710.3 65.4 1
 -1 -3 1 2764.9 65.3 4
 -1 -3 1 2787.8 54.4 5
 1 3 -1 2677.3 64.4 1
 1 3 -1 2710.9 62.5 1
 1 3 -1 2709 65.1 4
 -1 -3 0 34.761 25.517 1
 -1 -3 0 31.606 26.048 1
 -1 -3 0 -18.079 24.145 4
 -1 -3 0 20.874 18.365 5
 1 3 0 26.548 25.465 1
 1 3 0 1.165 26.552 1
 1 3 0 -13.848 24.161 4
 -1 -3 -1 23955.8 140.2 1
 -1 -3 -1 23767.7 139.5 1
 -1 -3 -1 23879.6 151.8 4
 -1 -3 -1 23328.1 102 5
 1 3 1 23926.2 140.7 1
 1 3 1 23399.4 138.4 1
 1 3 1 23016.7 147.6 4
 -1 -3 -2 27793.5 151 1
 -1 -3 -2 28812.6 154.5 1
 -1 -3 -2 28274.8 168.5 4
 -1 -3 -2 27810.1 97.7 5
 1 3 2 27428.8 150.2 1
 1 3 2 27634.8 151.4 1
 1 3 2 28687.9 101.7 2
 1 3 2 27860.8 166.3 4
 -1 -3 -3 14158.1 115.6 1
 -1 -3 -3 14276.8 115.7 1
 -1 -3 -3 14063.4 127.7 4
 -1 -3 -3 13937.6 58.6 5
 1 3 3 13895.5 113.9 1
 1 3 3 13991.1 114.3 1
 -1 -3 -4 3198.4 71.7 1
 -1 -3 -4 3327.1 70 1
 -1 -3 -4 3383.9 78.6 4
 1 3 4 3289.9 71.5 1
 1 3 4 3251.4 70.7 1
 1 3 4 3588.8 63.3 3
 -1 -3 -5 17588.2 133.6 1
 -1 -3 -5 17762.9 133.7 1
 -1 -3 -5 17622.5 152 4
 1 3 5 17546.8 133.4 1
 1 3 5 17261.3 132.2 1
 1 3 5 17829.4 113.7 3
 -1 -3 -6 29542.2 173.6 1
 -1 -3 -6 30527 177.6 1
 -1 -3 -6 29431.6 199.2 4
 1 3 6 29832 179 1
 1 3 6 29331.5 172.5 1
 1 3 6 29975.4 146.9 3
 -1 -3 -7 620.005 61.642 1
 -1 -3 -7 759.163 62.846 1
 -1 -3 -7 649.429 67.509 4
 1 3 7 596.231 59.792 1
 1 3 7 651.66 59.507 1
 1 3 7 737.475 59.365 3
 -1 -3 -8 8046.5 108.7 1
 -1 -3 -8 8034 109.5 1
 -1 -3 -8 8190 124.9 4
 1 3 8 8024.9 108.5 1
 1 3 8 7877.2 108.1 1
 1 3 8 6977.1 100 3
 -1 -3 -9 39.417 38.267 1
 -1 -3 -9 85.672 38.464 1
 1 3 9 41.207 37.214 1
 1 3 9 83.091 34.903 1
 1 3 9 63.597 32.947 3
 -1 -3 -10 1434.5 80.4 1
 -1 -3 -10 1416 80.4 1
 1 3 10 1424.3 78.7 1
 1 3 10 1401.9 75.9 1
 1 3 10 1345 57.6 3
 -1 -3 -11 250.707 47.941 1
 -1 -3 -11 338.92 49.181 1
 1 3 11 265.84 47.806 1
 1 3 11 285.189 50.246 1
 1 3 11 259.423 39.11 3
 -1 -3 -12 181.716 50.081 1
 -1 -3 -12 236.562 54.391 1
 1 3 12 244.45 50.763 1
 1 3 12 158.224 51.142 1
 1 3 12 208.564 39.863 3
 -1 -3 -13 -7.556 49.626 1
 -1 -3 -13 16.239 51.565 1
 1 3 13 -47.75 45.585 1
 1 3 13 -8.971 53.187 1
 1 3 13 38.498 41.223 3
 -1 -3 -14 39 53.777 1
 -1 -3 -14 -74.139 54.266 1
 1 3 14 -28.763 49.648 1
 1 3 14 46.833 58.943 1
 1 3 14 -2.49 41.312 3
 -1 -3 -15 90.843 60.198 1
 -1 -3 -15 71.332 63.115 1
 1 3 15 90.463 59.067 1
 1 3 15 173.219 65.737 1
 1 3 15 295.029 51.265 3
 -1 -3 -16 -8.77 60.946 1
 -1 -3 -16 -107.449 64.569 1
 1 3 16 -83.867 56.636 1
 1 3 16 -126.703 64.757 1
 1 3 16 -36.663 48.352 3
 -1 -3 -17 -116.929 64.157 1
 -1 -3 -17 -97.839 69.393 1
 1 3 17 -143.745 60.361 1
 1 3 17 -170.628 65.853 1
 1 3 17 -48.763 51.886 3
 -1 -3 -18 -125.204 69.879 1
 -1 -3 -18 -217.25 72.582 1
 1 3 18 -80.633 74.539 1
 1 3 18 36.229 59.236 3
 -1 -3 -19 149.044 84.328 1
 -1 -3 -19 411.467 93.347 1
 1 3 19 112.609 71.687 1
 1 3 19 235.844 93.688 1
 1 3 19 397.656 71.392 3
 -1 -4 21 -77.246 84.272 1
 -1 -4 21 -58.538 86.515 1
 -1 -4 21 0.997 74.916 5
 1 4 -21 73.789 85.897 1
 1 4 -21 41.424 86.476 4
 -1 -4 20 4.836 82.373 1
 -1 -4 20 18.915 82.084 1
 -1 -4 20 80.39 72.495 5
 1 4 -20 119.293 80.184 1
 1 4 -20 -57.4 87.867 1
 1 4 -20 158.196 79.395 4
 -1 -4 19 -3.584 65.504 1
 -1 -4 19 96.83 74.106 1
 -1 -4 19 145.491 69.314 5
 1 4 -19 131.893 81.311 1
 1 4 -19 201.847 82.579 1
 1 4 -19 164.996 67.04 4
 -1 -4 18 1117.8 132.9 1
 -1 -4 18 1130.3 131.8 1
 -1 -4 18 1395.1 134.4 5
 1 4 -18 1395 145.3 1
 1 4 -18 1253 138.1 1
 1 4 -18 1554.8 140.9 4
 -1 -4 17 292.801 69.903 1
 -1 -4 17 500.062 80.19 1
 -1 -4 17 485.073 70.645 5
 1 4 -17 489.138 80.749 1
 1 4 -17 432.997 78.596 1
 1 4 -17 463.277 75.58 4
 -1 -4 16 1350.8 117.3 1
 -1 -4 16 1184.6 126.3 1
 -1 -4 16 1442.5 127.4 5
 1 4 -16 1360 124 1
 1 4 -16 1485.6 130.8 1
 1 4 -16 1560.6 126.2 4
 -1 -4 15 268.417 59.181 1
 -1 -4 15 285.414 64.958 1
 -1 -4 15 113.278 59.605 5
 1 4 -15 247.332 63.756 1
 1 4 -15 359.376 69.605 1
 1 4 -15 206.522 57.208 4
 -1 -4 14 -38.803 46.973 1
 -1 -4 14 5.404 52.199 1
 1 4 -14 -31.759 51.523 1
 1 4 -14 -4.798 54.413 1
 1 4 -14 -24.026 54.827 4
 -1 -4 13 260.897 59.165 1
 -1 -4 13 306.262 57.109 1
 -1 -4 13 157.104 50.969 5
 1 4 -13 330.217 57.73 1
 1 4 -13 291.374 55.123 1
 1 4 -13 334.993 55.547 4
 -1 -4 12 65.719 49.111 1
 -1 -4 12 164.523 53.137 1
 -1 -4 12 47.333 45.416 5
 1 4 -12 71.076 46.909 1
 1 4 -12 71.448 46.126 1
 1 4 -12 127.935 44.639 4
 -1 -4 11 181.255 41.058 1
 -1 -4 11 224.673 48.307 1
 -1 -4 11 164.001 43.481 5
 1 4 -11 147.972 47.179 1
 1 4 -11 142.698 41.75 1
 1 4 -11 260.69 46.538 4
 -1 -4 10 906.93 76.478 1
 -1 -4 10 892.721 79.232 1
 -1 -4 10 984.455 80.643 5
 1 4 -10 955.635 82.215 1
 1 4 -10 914.32 74.711 1
 1 4 -10 885.884 77.231 4
 -1 -4 9 4508.1 103.5 1
 -1 -4 9 4463 103 1
 -1 -4 9 4582.7 104.9 5
 1 4 -9 4646.7 106.6 1
 1 4 -9 4559.9 102.1 1
 1 4 -9 4404.7 99.8 4
 -1 -4 8 1574.3 76.8 1
 -1 -4 8 1489.5 76.3 1
 -1 -4 8 1499.5 75.7 4
 -1 -4 8 1562.4 77.4 5
 1 4 -8 1470.1 77.3 1
 1 4 -8 1621.8 76.6 1
 1 4 -8 1575.1 74.5 4
 -1 -4 7 12522.8 140.8 1
 -1 -4 7 12309 139.5 1
 -1 -4 7 12456.9 137.9 4
 -1 -4 7 12482.7 138.7 5
 1 4 -7 12516.7 139.9 1
 1 4 -7 12380 141.1 1
 1 4 -7 12189.6 136 4
 -1 -4 6 3521 87.3 1
 -1 -4 6 3698.7 89.7 1
 -1 -4 6 3712.5 87.6 4
 -1 -4 6 3833.2 88.1 5
 1 4 -6 3616.8 91 1
 1 4 -6 3633.1 86 4
 -1 -4 5 10950.3 126.6 1
 -1 -4 5 10913.9 125.3 1
 -1 -4 5 10912.2 123.8 4
 -1 -4 5 10856.9 121.6 5
 1 4 -5 11112.7 126.6 1
 1 4 -5 10981.1 126.4 1
 1 4 -5 10915.4 123.3 4
 -1 -4 4 3901.5 85.5 1
 -1 -4 4 3955.5 86.3 1
 -1 -4 4 3946.5 85.4 4
 -1 -4 4 3916.9 81 5
 1 4 -4 3948.2 85.2 1
 1 4 -4 3965.4 85.5 1
 1 4 -4 3879.3 84 4
 -1 -4 3 1135.3 62.9 1
 -1 -4 3 1160.9 67.4 1
 -1 -4 3 1159.4 64.3 4
 -1 -4 3 1097.3 57.6 5
 1 4 -3 1248.2 67.6 1
 1 4 -3 1093.3 61.6 1
 1 4 -3 1031.7 62 4
 -1 -4 2 467.301 57.125 1
 -1 -4 2 461.939 41.6 1
 -1 -4 2 374.645 39.015 4
 -1 -4 2 469.83 48.748 5
 1 4 -2 489.431 58.917 1
 1 4 -2 417.013 38.81 1
 1 4 -2 416.337 38.424 4
 -1 -4 1 6.49 28.06 1
 -1 -4 1 2.833 31.515 1
 -1 -4 1 -63.488 28.487 4
 -1 -4 1 13.405 22.546 5
 1 4 -1 21.396 31.96 1
 1 4 -1 11.495 31.221 1
 1 4 -1 -48.399 27.761 4
 -1 -4 0 26156.5 170.2 1
 -1 -4 0 26441 171.3 1
 -1 -4 0 26206.2 176 4
 -1 -4 0 26138.2 135.9 5
 1 4 0 26262.8 170.9 1
 1 4 0 25988.4 169.2 1
 1 4 0 26099.8 175.3 4
 -1 -4 -1 21617.5 157.1 1
 -1 -4 -1 21920.7 157.4 1
 -1 -4 -1 21567.3 163.9 4
 -1 -4 -1 21223.6 114.9 5
 1 4 1 22122.4 158.1 1
 1 4 1 21372.7 154.6 1
 1 4 1 21205.3 161.1 4
 -1 -4 -2 39163.2 205.9 1
 -1 -4 -2 40592.5 209.7 1
 -1 -4 -2 40162.1 222.5 4
 -1 -4 -2 39303.7 139.5 5
 1 4 2 39629.8 207.3 1
 1 4 2 39632.8 208.1 1
 1 4 2 39263.9 218.7 4
 -1 -4 -3 20490.2 157.6 1
 -1 -4 -3 20765.6 158.3 1
 -1 -4 -3 21174.1 171.1 4
 -1 -4 -3 20313.6 91.2 5
 1 4 3 20252.8 154.7 1
 1 4 3 20191.1 156.2 1
 1 4 3 19674.3 163 4
 -1 -4 -4 5245.8 96.8 1
 -1 -4 -4 5159.2 95.6 1
 -1 -4 -4 5258.8 103.8 4
 1 4 4 5166.4 94.7 1
 1 4 4 5049.1 96.4 1
 -1 -4 -5 20064.9 160.9 1
 -1 -4 -5 19889.3 159.3 1
 -1 -4 -5 19802.3 175.3 4
 1 4 5 20116.2 161.3 1
 1 4 5 20026.8 160.2 1
 -1 -4 -6 10442.2 127.3 1
 -1 -4 -6 10331 124.9 1
 -1 -4 -6 10320.7 139.2 4
 1 4 6 10337.3 125.9 1
 1 4 6 10202 124.1 1
 -1 -4 -7 859.612 73.667 1
 -1 -4 -7 955.705 74.552 1
 -1 -4 -7 781.45 80.987 4
 1 4 7 854.798 74.728 1
 1 4 7 757.66 70.347 1
 -1 -4 -8 7160.1 117.3 1
 -1 -4 -8 7079.8 120.7 1
 -1 -4 -8 7165.2 133 4
 1 4 8 7321.4 120.1 1
 1 4 8 6873.4 115.3 1
 1 4 8 6913.9 87.5 3
 -1 -4 -9 1202.8 85 1
 -1 -4 -9 1186.1 89.7 1
 -1 -4 -9 1234.5 93.3 4
 1 4 9 1257 84.7 1
 1 4 9 1132.7 83 1
 1 4 9 1275.8 60.7 3
 -1 -4 -10 1169 93.1 1
 -1 -4 -10 1172.9 92.5 1
 -1 -4 -10 1138.6 99.8 4
 1 4 10 1082.9 86.2 1
 1 4 10 946.085 87.3 1
 1 4 10 1145.3 60.7 3
 -1 -4 -11 1996.4 101.7 1
 -1 -4 -11 2084.2 102.4 1
 -1 -4 -11 1690.1 168.6 4
 1 4 11 1785.1 129.7 1
 1 4 11 1878.3 100.8 1
 1 4 11 1723 67.9 3
 -1 -4 -12 80.186 61.757 1
 -1 -4 -12 126.958 55.51 1
 -1 -4 -12 171.95 57.331 4
 1 4 12 108.344 51.109 1
 1 4 12 106.75 55.141 1
 1 4 12 140.255 42.353 3
 -1 -4 -13 269.14 59.89 1
 -1 -4 -13 231.147 61.593 1
 -1 -4 -13 389.825 70.766 4
 1 4 13 322.414 59.681 1
 1 4 13 339.752 66.022 1
 1 4 13 320.953 48.028 3
 -1 -4 -14 169.506 63.598 1
 -1 -4 -14 178.791 67.924 1
 -1 -4 -14 196.076 68.953 4
 1 4 14 168.269 62.493 1
 1 4 14 341.529 70.528 1
 1 4 14 318.824 51.809 3
 -1 -4 -15 -55.326 63.484 1
 -1 -4 -15 -55.232 66.205 1
 -1 -4 -15 -158.064 64.011 4
 1 4 15 -77.903 67.617 1
 1 4 15 16.523 48.453 3
 -1 -4 -16 8.275 69.899 1
 -1 -4 -16 -147.737 71.063 1
 -1 -4 -16 -99.86 67.458 4
 1 4 16 -80.341 75.729 1
 1 4 16 -34.303 52.492 3
 -1 -4 -17 162.377 81.53 1
 -1 -4 -17 30.714 81.561 1
 -1 -4 -17 -164.784 72.592 4
 1 4 17 -145.168 69.516 1
 1 4 17 20.344 83.586 1
 1 4 17 165.349 61.264 3
 -1 -4 -18 -52.491 81.33 1
 -1 -4 -18 -134.267 84.543 1
 1 4 18 16.98 64.385 3
 -1 -5 20 78.361 84.364 1
 -1 -5 20 342.253 93.94 1
 -1 -5 20 83.805 80.791 5
 1 5 -20 202.785 94.233 1
 1 5 -20 157.634 94.056 1
 1 5 -20 158.888 83.564 4
 -1 -5 19 -60.69 74.34 1
 -1 -5 19 102.674 77.465 1
 -1 -5 19 -43.18 72.481 5
 1 5 -19 62.568 83.241 1
 1 5 -19 123.504 89.206 1
 1 5 -19 -57.456 76.944 4
 -1 -5 18 652.502 94.845 1
 -1 -5 18 562.846 88.354 1
 -1 -5 18 640.88 81.212 5
 1 5 -18 636.313 83.81 1
 1 5 -18 705.979 95.701 1
 1 5 -18 644.854 88.893 4
 -1 -5 17 333.026 112.732 1
 -1 -5 17 460.078 77.219 1
 -1 -5 17 428.918 71.782 5
 1 5 -17 448.352 83.35 1
 1 5 -17 448.005 78.505 1
 1 5 -17 232.064 72.665 4
 -1 -5 16 6140 164.7 1
 -1 -5 16 6542.2 171.6 1
 -1 -5 16 6399.3 171.7 5
 1 5 -16 6651.6 173.8 1
 1 5 -16 6377.3 252.9 1
 1 5 -16 6334.6 173 4
 -1 -5 15 6212.5 156.7 1
 -1 -5 15 6370.4 164.6 1
 -1 -5 15 6514.9 165.9 5
 1 5 -15 6636 167.6 1
 1 5 -15 6618.9 166 1
 1 5 -15 6323.8 163 4
 -1 -5 14 212.007 65.928 1
 -1 -5 14 227.007 65.319 1
 -1 -5 14 71.506 55.331 5
 1 5 -14 179.655 63.695 1
 1 5 -14 113.599 58.306 1
 1 5 -14 157.925 58.798 4
 -1 -5 13 278.608 61.913 1
 -1 -5 13 385.365 65.206 1
 -1 -5 13 87.073 55.111 5
 1 5 -13 350.143 77.514 1
 1 5 -13 231.032 58.074 1
 1 5 -13 268.775 65.425 4
 -1 -5 12 411.987 53.424 1
 -1 -5 12 254.865 58.371 1
 -1 -5 12 222.383 57.007 5
 1 5 -12 285.973 53.168 1
 1 5 -12 209.197 49.853 1
 1 5 -12 259.173 49.832 4
 -1 -5 11 577.882 59.133 1
 -1 -5 11 584.697 57.694 1
 -1 -5 11 563.594 58.292 5
 1 5 -11 608.061 56.59 1
 1 5 -11 618.824 63.492 1
 1 5 -11 801.753 83.735 4
 -1 -5 10 74.511 48.537 1
 -1 -5 10 93.537 45.414 1
 -1 -5 10 4.865 41.683 5
 1 5 -10 95.81 49.781 1
 1 5 -10 68.758 46.589 1
 1 5 -10 84.629 42 4
 -1 -5 9 2704.6 98.7 1
 -1 -5 9 2667.8 99.5 1
 -1 -5 9 2836.4 98.5 4
 -1 -5 9 2723 99.3 5
 1 5 -9 2699.6 104.4 1
 1 5 -9 2737 93.2 4
 -1 -5 8 93.988 43.363 1
 -1 -5 8 32.224 38.561 1
 -1 -5 8 11.923 37.573 4
 -1 -5 8 -46.75 35.369 5
 1 5 -8 35.003 37.198 1
 1 5 -8 71.072 40.97 1
 1 5 -8 3.752 32.545 4
 -1 -5 7 4062.8 101.5 1
 -1 -5 7 3961 102.7 1
 -1 -5 7 4024.6 100.2 4
 -1 -5 7 4012.8 100.5 5
 1 5 -7 4039 100.3 1
 1 5 -7 4121.8 104.9 1
 1 5 -7 3934.8 98.2 4
 -1 -5 6 27.298 36.447 1
 -1 -5 6 -51.364 31.009 1
 -1 -5 6 18.847 33.769 4
 -1 -5 6 11.816 30.16 5
 1 5 -6 -11.49 36.769 1
 1 5 -6 -40.962 35.254 1
 1 5 -6 -4.34 33.676 4
 -1 -5 5 227.959 41.181 1
 -1 -5 5 308.083 46.056 1
 -1 -5 5 206.191 36.716 4
 -1 -5 5 242.408 35.942 5
 1 5 -5 209.777 37.111 1
 1 5 -5 277.908 44.745 1
 1 5 -5 175.365 35.302 4
 -1 -5 4 246.837 42.109 1
 -1 -5 4 220.973 43.137 1
 -1 -5 4 127.421 34.963 4
 -1 -5 4 163.023 32.803 5
 1 5 -4 208.938 42.206 1
 1 5 -4 236.51 41.685 1
 1 5 -4 124.008 35.906 4
 -1 -5 3 9174.8 124.2 1
 -1 -5 3 9809 130.3 1
 -1 -5 3 9437 126.4 4
 -1 -5 3 9313 112.7 5
 1 5 -3 9448.8 128.2 1
 1 5 -3 9461.5 127.2 1
 1 5 -3 9184.6 123 4
 -1 -5 2 7458.5 113.6 1
 -1 -5 2 7873.5 119.3 1
 -1 -5 2 7572.9 115.9 4
 -1 -5 2 7529.9 99.5 5
 1 5 -2 7833.2 117.5 1
 1 5 -2 7881.6 117.8 1
 1 5 -2 7412.3 113.9 4
 -1 -5 1 1429 74.6 1
 -1 -5 1 1553.4 76.6 1
 -1 -5 1 1437 73.8 4
 -1 -5 1 1585.8 61.1 5
 1 5 -1 1527.2 77.1 1
 1 5 -1 1541.4 77.1 1
 1 5 -1 1487.8 74.1 4
 -1 -5 0 2558.6 83.7 1
 -1 -5 0 2708.1 86 1
 -1 -5 0 2619 85.6 4
 -1 -5 0 2697.8 64 5
 1 5 0 2619.6 84.6 1
 1 5 0 2568 82.4 1
 1 5 0 2660.9 82.4 4
 -1 -5 -1 748.866 69.006 1
 -1 -5 -1 863.582 70.873 1
 -1 -5 -1 807.91 71.789 4
 -1 -5 -1 967.689 48.075 5
 1 5 1 842.167 71.42 1
 1 5 1 739.851 69.374 1
 1 5 1 749.97 66.827 4
 -1 -5 -2 887.742 70.271 1
 -1 -5 -2 858.858 71.732 1
 -1 -5 -2 806.463 71.717 4
 -1 -5 -2 921.742 43.561 5
 1 5 2 851.608 71.277 1
 1 5 2 901.361 71.748 1
 1 5 2 928.074 70.654 4
 -1 -5 -3 107.044 40.616 1
 -1 -5 -3 92.1 40.419 1
 -1 -5 -3 52.882 39.629 4
 -1 -5 -3 64.394 20.194 5
 1 5 3 47.895 37.014 1
 1 5 3 85.652 39.139 1
 1 5 3 105.43 37.955 4
 -1 -5 -4 16733.8 164.6 1
 -1 -5 -4 17126.7 166.2 1
 -1 -5 -4 16560.8 173.9 4
 1 5 4 16673.7 162 1
 1 5 4 16412.6 162.8 1
 -1 -5 -5 10635.6 142 1
 -1 -5 -5 10641.1 141.7 1
 -1 -5 -5 10211 148.6 4
 1 5 5 10132.5 137.5 1
 1 5 5 9964.4 137.7 1
 -1 -5 -6 596.645 57.593 1
 -1 -5 -6 678.169 60.37 1
 -1 -5 -6 787.22 85.042 4
 1 5 6 597.941 54.129 1
 1 5 6 510.859 53.522 1
 -1 -5 -7 338.59 52.646 1
 -1 -5 -7 361.414 50.283 1
 -1 -5 -7 342.877 54.404 4
 1 5 7 286.855 49.353 1
 1 5 7 407.159 51.379 1
 -1 -5 -8 6553.6 130.4 1
 -1 -5 -8 6599.2 129.7 1
 -1 -5 -8 6534 141.5 4
 1 5 8 6576.5 129.5 1
 1 5 8 6528.6 129.4 1
 -1 -5 -9 -13.859 46.527 1
 -1 -5 -9 4.914 47.319 1
 -1 -5 -9 -20.823 49.055 4
 1 5 9 5.76 89.591 1
 1 5 9 40.247 46.532 1
 -1 -5 -10 239.655 58.507 1
 -1 -5 -10 281.38 59.297 1
 -1 -5 -10 298.776 59.676 4
 1 5 10 262.884 57.177 1
 1 5 10 210.791 53.256 1
 -1 -5 -11 435.471 65.515 1
 -1 -5 -11 462.348 67.644 1
 -1 -5 -11 396.367 64.847 4
 1 5 11 437.13 65.951 1
 1 5 11 375.755 62.321 1
 -1 -5 -12 2570.9 124 1
 -1 -5 -12 2139.8 125.7 1
 -1 -5 -12 2353.8 138.5 4
 1 5 12 2406.2 125.7 1
 1 5 12 2316.6 124.7 1
 -1 -5 -13 23.32 64.196 1
 -1 -5 -13 24.971 64.406 1
 -1 -5 -13 -80.409 62.429 4
 1 5 13 56.607 65.338 1
 1 5 13 80.854 65.965 1
 -1 -5 -14 1261 134.3 1
 -1 -5 -14 1070.4 133.8 1
 -1 -5 -14 848.082 88.538 4
 1 5 14 1479.5 132.4 1
 1 5 14 1443 136.5 1
 -1 -5 -15 2751.7 150.4 1
 -1 -5 -15 2347.3 153.2 1
 -1 -5 -15 2413 164 4
 1 5 15 2490.1 151.4 1
 1 5 15 2793.6 160.1 1
 -1 -5 -16 1022.6 100.5 1
 -1 -5 -16 1056.9 104.5 1
 -1 -5 -16 885.364 97.306 4
 1 5 16 1215 148 1
 1 5 16 1646.6 167.6 1
 -1 -5 -17 755.88 103.941 1
 -1 -5 -17 77.315 96.751 1
 -1 -5 -17 396.584 98.708 4
 1 5 17 284.564 94.294 1
 1 5 17 656.423 110.45 1
 -1 -6 19 176.502 79.271 1
 -1 -6 19 123.455 97.925 1
 -1 -6 19 83.292 80.266 5
 1 6 -19 277.835 102.493 1
 1 6 -19 58.667 98.907 1
 1 6 -19 119.248 85.722 4
 -1 -6 18 -23.531 79.092 1
 -1 -6 18 98.496 82.92 1
 -1 -6 18 -50.143 71.009 5
 1 6 -18 156.904 75.019 1
 1 6 -18 113.651 83.266 1
 1 6 -18 -82.574 72.206 4
 -1 -6 17 149.143 81.699 1
 -1 -6 17 325.714 85.405 1
 -1 -6 17 241.723 70.932 5
 1 6 -17 233.682 68.041 1
 1 6 -17 267.524 83.082 1
 1 6 -17 297.681 78.132 4
 -1 -6 16 3508.8 153.7 1
 -1 -6 16 3641 163.9 1
 -1 -6 16 3054.5 153 5
 1 6 -16 3350.4 158.5 1
 1 6 -16 3647.4 164.5 1
 1 6 -16 3591.2 151.8 4
 -1 -6 15 281.559 75.386 1
 -1 -6 15 482.66 82.1 1
 -1 -6 15 354.078 67.815 5
 1 6 -15 306.846 67.895 1
 1 6 -15 288.983 71.559 1
 1 6 -15 291.768 62.003 4
 -1 -6 14 1228.1 123.4 1
 -1 -6 14 1504.7 132.5 1
 -1 -6 14 1334.4 128 5
 1 6 -14 1295.9 132.8 1
 1 6 -14 1106.5 113.7 1
 1 6 -14 1374 113.7 4
 -1 -6 13 6575.9 160.7 1
 -1 -6 13 6894.6 165.8 1
 -1 -6 13 7540.3 168.5 5
 1 6 -13 7331 171.5 1
 1 6 -13 6787.5 193.3 1
 1 6 -13 6803.2 153.8 4
 -1 -6 12 37.18 47.42 1
 -1 -6 12 14.417 56.359 1
 -1 -6 12 32.335 50.776 5
 1 6 -12 41.146 54.001 1
 1 6 -12 10.893 53.776 1
 1 6 -12 14.637 49.276 4
 -1 -6 11 2026.4 110.1 1
 -1 -6 11 2022.4 170.1 1
 -1 -6 11 2077.2 115.3 5
 1 6 -11 2106.9 114.9 1
 1 6 -11 2088.9 110.5 1
 1 6 -11 1592.4 164 4
 -1 -6 10 1015.1 95.4 1
 -1 -6 10 1163.8 101.2 1
 -1 -6 10 1070.5 100.8 4
 -1 -6 10 1012.5 100.8 5
 1 6 -10 1068.1 102 1
 1 6 -10 990.439 93 4
 -1 -6 9 432.865 53.667 1
 -1 -6 9 576.922 65.981 1
 -1 -6 9 471.725 58.009 4
 -1 -6 9 508.509 56.133 5
 1 6 -9 788.726 92.787 1
 1 6 -9 483.907 61.894 1
 1 6 -9 390.078 49.414 4
 -1 -6 8 2322.2 103 1
 -1 -6 8 2488.7 106.3 1
 -1 -6 8 2581.6 104.3 4
 -1 -6 8 2301.2 103.6 5
 1 6 -8 2548.2 106.3 1
 1 6 -8 2229.3 102.9 1
 1 6 -8 2389.7 99.3 4
 -1 -6 7 223.112 48.167 1
 -1 -6 7 176.072 43.675 1
 -1 -6 7 215.345 44.931 4
 -1 -6 7 242.069 46.597 5
 1 6 -7 199.988 49.901 1
 1 6 -7 199.486 45.632 1
 1 6 -7 305.805 48.696 4
 -1 -6 6 239.225 49.649 1
 -1 -6 6 267.965 50.598 1
 -1 -6 6 258.047 47.575 4
 -1 -6 6 198.265 42.361 5
 1 6 -6 210.648 43.794 1
 1 6 -6 224.983 46.933 1
 1 6 -6 238.025 44.631 4
 -1 -6 5 7338.6 130.8 1
 -1 -6 5 7441.5 133.6 1
 -1 -6 5 7306 128.8 4
 -1 -6 5 7496.4 124.5 5
 1 6 -5 7275.6 132.4 1
 1 6 -5 7262.4 132.1 1
 1 6 -5 7433 127.6 4
 -1 -6 4 636.954 77.051 1
 -1 -6 4 585.381 56.967 1
 -1 -6 4 512.815 52.523 4
 -1 -6 4 762.447 70.725 5
 1 6 -4 555.826 55.173 1
 1 6 -4 679.381 83.84 1
 1 6 -4 660.812 74.785 4
 -1 -6 3 31.454 41.328 1
 -1 -6 3 51.226 42.778 1
 -1 -6 3 16.963 38.025 4
 -1 -6 3 53.353 31.821 5
 1 6 -3 -17.005 41.432 1
 1 6 -3 15.148 43.275 1
 1 6 -3 31.239 36.514 4
 -1 -6 2 2187.6 91.8 1
 -1 -6 2 2406.5 98.9 1
 -1 -6 2 2470.8 92.7 4
 -1 -6 2 2277.8 78 5
 1 6 -2 2291.1 94 1
 1 6 -2 2361.6 96 1
 1 6 -2 2204.4 87.6 4
 -1 -6 1 474.682 52.755 1
 -1 -6 1 468.381 52.202 1
 -1 -6 1 509.683 51.797 4
 -1 -6 1 548.464 61.216 5
 1 6 -1 488.507 52.288 1
 1 6 -1 448.026 50.966 1
 1 6 -1 514.278 50.195 4
 -1 -6 0 66.373 42.013 1
 -1 -6 0 69.287 43.72 1
 -1 -6 0 56.677 38.755 4
 -1 -6 0 5.546 27.306 5
 1 6 0 65.677 42.44 1
 1 6 0 98.958 45.336 1
 1 6 0 84.218 37.336 4
 -1 -6 -1 59.845 44.66 1
 -1 -6 -1 91.152 46.152 1
 -1 -6 -1 104.518 41.629 4
 -1 -6 -1 67.878 27.614 5
 1 6 1 51.372 42.566 1
 1 6 1 76.364 43.241 1
 1 6 1 40.159 38.176 4
 -1 -6 -2 1333.7 88.4 1
 -1 -6 -2 1595.7 92.8 1
 -1 -6 -2 1513 92.8 4
 -1 -6 -2 1459.5 56.1 5
 1 6 2 1577.5 90.2 1
 1 6 2 1389.2 90.9 1
 1 6 2 1453.2 83.2 4
 -1 -6 -3 335.542 54.384 1
 -1 -6 -3 382.992 53.546 1
 -1 -6 -3 439.127 53.133 4
 -1 -6 -3 417.018 44.745 5
 1 6 3 530.131 55.977 1
 1 6 3 359.437 54.309 1
 1 6 3 261.421 41.631 4
 -1 -6 -4 94.548 47.508 1
 -1 -6 -4 113.869 48.745 1
 -1 -6 -4 75.979 45.509 4
 1 6 4 56.498 45.518 1
 1 6 4 66.754 51.413 1
 -1 -6 -5 3.237 48.2 1
 -1 -6 -5 36.755 50.062 1
 -1 -6 -5 -25.078 47.025 4
 1 6 5 -16.226 46.492 1
 1 6 5 -72.378 45.784 1
 -1 -6 -6 2912.6 113.6 1
 -1 -6 -6 2737 113.5 1
 -1 -6 -6 3162.3 120.8 4
 1 6 6 2379.8 174.6 1
 1 6 6 2819.1 114.9 1
 -1 -6 -7 213.565 102.17 1
 -1 -6 -7 168.017 56.201 1
 -1 -6 -7 198.919 92.985 4
 1 6 7 262.856 54.544 1
 1 6 7 297.107 60.291 1
 -1 -6 -8 118.215 56.377 1
 -1 -6 -8 63.029 57.637 1
 -1 -6 -8 50.751 53.034 4
 1 6 8 107.283 53.398 1
 1 6 8 66.027 53.2 1
 -1 -6 -9 504.432 65.893 1
 -1 -6 -9 587.653 69.704 1
 -1 -6 -9 631.775 72.033 4
 1 6 9 524.992 64.923 1
 1 6 9 587.704 71.503 1
 -1 -6 -10 1554.3 121.1 1
 -1 -6 -10 1483.5 117.7 1
 -1 -6 -10 1403 129.1 4
 1 6 10 1486.2 118.5 1
 1 6 10 1558 118.5 1
 -1 -6 -11 171.561 64.574 1
 -1 -6 -11 -33.128 59.085 1
 -1 -6 -11 15.954 66.892 4
 1 6 11 -10.186 60.749 1
 1 6 11 64.884 59.404 1
 -1 -6 -12 2962.3 147.9 1
 -1 -6 -12 2981.3 142.1 1
 -1 -6 -12 2646.6 156.1 4
 1 6 12 2795.6 141.1 1
 1 6 12 2656 146.7 1
 -1 -6 -13 3870.2 158.7 1
 -1 -6 -13 3688.1 155.9 1
 -1 -6 -13 3648 176 4
 1 6 13 3575.8 158.1 1
 1 6 13 3318.4 158.2 1
 -1 -6 -14 -60.735 79.018 1
 -1 -6 -14 137.288 75.246 1
 -1 -6 -14 185.843 84.162 4
 1 6 14 -20.991 74.487 1
 1 6 14 268.41 87.388 1
 -1 -6 -15 787.519 104.923 1
 -1 -6 -15 774.923 95.433 1
 -1 -6 -15 1468.6 180.8 4
 1 6 15 536.315 92.164 1
 1 6 15 1812.3 171.8 1
 -1 -7 18 1251.3 155.9 1
 -1 -7 18 1119.8 123.5 1
 -1 -7 18 1529 180.1 5
 1 7 -18 1746.3 170.1 1
 1 7 -18 1610.6 184.2 1
 1 7 -18 894.872 102.769 4
 -1 -7 17 241.187 81.643 1
 -1 -7 17 450.034 98.953 1
 -1 -7 17 242.161 86.23 5
 1 7 -17 362.395 85.245 1
 1 7 -17 411.155 93.615 1
 1 7 -17 144.873 78.126 4
 -1 -7 16 559.586 91.452 1
 -1 -7 16 731.837 98.246 1
 -1 -7 16 414.218 79.08 5
 1 7 -16 492.249 90.232 1
 1 7 -16 331.922 86.683 1
 1 7 -16 421.778 75.898 4
 -1 -7 15 1575.1 137.8 1
 -1 -7 15 1700 152.2 1
 -1 -7 15 1410 142 5
 1 7 -15 1520.1 146.2 1
 1 7 -15 1666.4 140.3 1
 1 7 -15 1421.9 132.8 4
 -1 -7 14 3708.1 149.8 1
 -1 -7 14 3828.4 164.6 1
 -1 -7 14 4193.2 162.4 5
 1 7 -14 4568.6 164.7 1
 1 7 -14 4512.6 159.6 1
 1 7 -14 4216.7 150.3 4
 -1 -7 13 1231.2 117.1 1
 -1 -7 13 1212.5 132.2 1
 -1 -7 13 1535.3 132.6 5
 1 7 -13 1222.1 133.7 1
 1 7 -13 1159.8 125 1
 1 7 -13 1270.3 121 4
 -1 -7 12 101.241 61.164 1
 -1 -7 12 197.147 69.891 1
 -1 -7 12 228.047 64.196 5
 1 7 -12 175.614 65.12 1
 1 7 -12 233.75 65.203 1
 1 7 -12 42.11 51.696 4
 -1 -7 11 525.52 113.496 1
 -1 -7 11 356.676 66.806 1
 -1 -7 11 510.887 66.856 5
 1 7 -11 599.529 74.823 1
 1 7 -11 496.649 68.448 4
 -1 -7 10 644.83 81.643 1
 -1 -7 10 553.196 67.984 1
 -1 -7 10 571.346 64.075 4
 -1 -7 10 566.232 64.366 5
 1 7 -10 669.647 73.599 1
 1 7 -10 680.257 78.968 1
 1 7 -10 569.039 65.848 4
 -1 -7 9 2083.8 118.4 1
 -1 -7 9 2088.7 123.7 1
 -1 -7 9 2013.4 189.1 4
 -1 -7 9 2385 118.4 5
 1 7 -9 2210.2 162.9 1
 1 7 -9 2439 125.2 1
 1 7 -9 2065.9 113.1 4
 -1 -7 8 2378.1 117.4 1
 -1 -7 8 2389.1 115.6 4
 -1 -7 8 2401.9 118.3 5
 1 7 -8 2296.2 162 1
 1 7 -8 2558.6 119.9 1
 1 7 -8 2245.7 134.2 4
 -1 -7 7 -4.134 51.374 1
 -1 -7 7 -35.073 49.912 1
 -1 -7 7 0.238 45.855 4
 -1 -7 7 26.53 45.101 5
 1 7 -7 -39.604 54.032 1
 1 7 -7 -84.082 50.887 1
 1 7 -7 8.627 42.872 4
 -1 -7 6 492.887 61.423 1
 -1 -7 6 323.859 58.196 1
 -1 -7 6 418.166 54.199 4
 -1 -7 6 371.477 51.797 5
 1 7 -6 476.401 59.007 1
 1 7 -6 472.641 65.695 1
 1 7 -6 310.444 49.828 4
 -1 -7 5 497.434 60.473 1
 -1 -7 5 488.597 62.15 1
 -1 -7 5 801.356 94.787 4
 -1 -7 5 457.79 52.042 5
 1 7 -5 608.402 68.835 1
 1 7 -5 462.137 62.328 1
 1 7 -5 393.284 55.61 4
 -1 -7 4 -9.487 45.925 1
 -1 -7 4 -90.601 46.399 1
 -1 -7 4 -57.477 43.926 4
 -1 -7 4 45.784 39.863 5
 1 7 -4 -2.534 49.773 1
 1 7 -4 37.883 53.048 1
 1 7 -4 -66.082 42.08 4
 -1 -7 3 330.038 58.538 1
 -1 -7 3 311.701 59.253 1
 -1 -7 3 369.19 54.939 4
 -1 -7 3 320.644 45.693 5
 1 7 -3 363.839 59.046 1
 1 7 -3 465.344 62.247 1
 1 7 -3 298.135 52.046 4
 -1 -7 2 146.108 52.273 1
 -1 -7 2 50.966 52.915 1
 -1 -7 2 164 50.864 4
 -1 -7 2 167.051 39.834 5
 1 7 -2 46.99 49.597 1
 1 7 -2 126.583 49.037 1
 1 7 -2 57.491 44.076 4
 -1 -7 1 2494.8 113.1 1
 -1 -7 1 2578.2 115.4 1
 -1 -7 1 2573.5 112.9 4
 -1 -7 1 2546.2 86.3 5
 1 7 -1 2439.3 112.1 1
 1 7 -1 2622.3 112.6 1
 1 7 -1 2418.6 102.8 4
 -1 -7 0 333.416 58.786 1
 -1 -7 0 507.067 65.32 1
 -1 -7 0 524.034 61.883 4
 -1 -7 0 494.724 43.88 5
 1 7 0 472.083 77.519 1
 1 7 0 475.428 61.581 1
 1 7 0 412.445 54.245 4
 -1 -7 -1 420.527 64.919 1
 -1 -7 -1 568.161 68.455 1
 -1 -7 -1 817.939 97.409 4
 -1 -7 -1 558.154 62.496 5
 1 7 1 431.97 76.779 1
 1 7 1 624.701 66.767 1
 1 7 1 427.004 54.97 4
 -1 -7 -2 255.62 67.418 1
 -1 -7 -2 164.15 58.484 1
 -1 -7 -2 298.111 55.531 4
 -1 -7 -2 216.438 34.099 5
 1 7 2 242.849 59.191 1
 1 7 2 223.138 58.809 1
 1 7 2 287.793 53.562 4
 -1 -7 -3 103.144 73.449 1
 -1 -7 -3 145.858 62.221 1
 -1 -7 -3 184.162 55.045 4
 -1 -7 -3 149.926 29.927 5
 1 7 3 64.973 55.739 1
 1 7 3 11.462 56.572 1
 -1 -7 -4 18.328 55.174 1
 -1 -7 -4 -50.001 54.396 1
 -1 -7 -4 55.726 92.351 4
 1 7 4 66.943 56.621 1
 1 7 4 54.84 58.825 1
 -1 -7 -5 3.024 57.504 1
 -1 -7 -5 40.811 59.098 1
 -1 -7 -5 19.554 53.623 4
 1 7 5 -21.253 51.052 1
 1 7 5 -5.922 59.088 1
 -1 -7 -6 221.526 63.913 1
 -1 -7 -6 166.249 60.952 1
 -1 -7 -6 107.081 57.412 4
 1 7 6 128.167 58.189 1
 1 7 6 57.479 63.053 1
 -1 -7 -7 206.222 65.546 1
 -1 -7 -7 294.007 66.847 1
 -1 -7 -7 174.137 63.592 4
 1 7 7 240.681 59.621 1
 1 7 7 219.671 67.38 1
 -1 -7 -8 95.961 65.596 1
 -1 -7 -8 100.823 68.832 1
 -1 -7 -8 142.065 65.423 4
 1 7 8 86.731 61.292 1
 1 7 8 84.321 63.146 1
 -1 -7 -9 -6.923 62.511 1
 -1 -7 -9 7.61 63.741 1
 -1 -7 -9 -62.433 62.266 4
 1 7 9 -85.706 56.417 1
 1 7 9 -47.273 63.021 1
 -1 -7 -10 -29.805 65.711 1
 -1 -7 -10 39.043 68.372 1
 -1 -7 -10 -100.184 67.358 4
 1 7 10 142.561 67.774 1
 1 7 10 160.264 70.19 1
 -1 -7 -11 -27.45 73.061 1
 -1 -7 -11 -150.493 69.813 1
 -1 -7 -11 215.716 77.829 4
 1 7 11 -10.572 64.015 1
 1 7 11 -36.295 69.963 1
 -1 -7 -12 141.696 79.878 1
 -1 -7 -12 -33.865 81.231 1
 -1 -7 -12 -21.533 73.944 4
 1 7 12 183.922 72.614 1
 1 7 12 -38.401 74.7 1
 -1 -7 -13 -74.658 80.816 1
 -1 -7 -13 153.786 86.598 1
 -1 -7 -13 11.224 82.257 4
 1 7 13 138.753 80.175 1
 1 7 13 -69.599 81.058 1
 -1 -8 17 25.607 99.575 1
 -1 -8 17 79.109 91.983 5
 1 8 -17 -169.314 83.184 1
 1 8 -17 -112.922 88.081 1
 1 8 -17 60.038 85.299 4
 -1 -8 16 83.778 88.325 1
 -1 -8 16 205.052 91.573 1
 -1 -8 16 182.391 77.729 5
 1 8 -16 11.295 83.535 1
 1 8 -16 -16.301 82.114 1
 1 8 -16 44.072 76.015 4
 -1 -8 15 50.504 82.418 1
 -1 -8 15 56.522 85.491 1
 -1 -8 15 159.303 81.991 5
 1 8 -15 194.177 82.445 1
 1 8 -15 115.721 79.771 1
 1 8 -15 25.116 73.706 4
 -1 -8 14 151.273 78.935 1
 -1 -8 14 73.197 75.94 1
 -1 -8 14 77.505 71.573 5
 1 8 -14 48.867 76.492 1
 1 8 -14 17.146 74.18 1
 1 8 -14 68.361 72.77 4
 -1 -8 13 91.045 72.03 1
 -1 -8 13 40.816 73.801 1
 -1 -8 13 11.56 65.644 5
 1 8 -13 -81.275 72.292 1
 1 8 -13 -62.293 67.194 1
 1 8 -13 161.095 68.085 4
 -1 -8 12 3390.9 153.7 1
 -1 -8 12 2861.9 147.8 1
 -1 -8 12 3648.2 157.5 5
 1 8 -12 3307.9 158.7 1
 1 8 -12 3496.2 147.3 4
 -1 -8 11 77.475 65.845 1
 -1 -8 11 42.577 66.554 1
 -1 -8 11 32.744 64.43 4
 -1 -8 11 27.785 60.939 5
 1 8 -11 33.112 66.593 1
 1 8 -11 27.948 71.245 1
 1 8 -11 80.45 58.762 4
 -1 -8 10 2640.6 138 1
 -1 -8 10 2666.7 139.8 1
 -1 -8 10 2756.5 138.7 4
 -1 -8 10 2917.7 141.8 5
 1 8 -10 2694.2 141.8 1
 1 8 -10 3212.1 148.6 1
 1 8 -10 2346 129.1 4
 -1 -8 9 1870.6 131.2 1
 -1 -8 9 2078.9 137.3 1
 -1 -8 9 1958.9 126.3 4
 -1 -8 9 2017.6 127.6 5
 1 8 -9 1854.4 129.2 1
 1 8 -9 1838.6 134.8 1
 1 8 -9 1823.5 122.8 4
 -1 -8 8 1213 121.6 1
 -1 -8 8 1150.1 117.5 1
 -1 -8 8 1164.8 120.2 4
 -1 -8 8 1337.6 117.3 5
 1 8 -8 1102.3 120.8 1
 1 8 -8 1311.3 128.9 1
 1 8 -8 1179.3 112 4
 -1 -8 7 7507.2 168.5 1
 -1 -8 7 7575.3 166.6 1
 -1 -8 7 7632.9 161.7 4
 -1 -8 7 8315.6 166.1 5
 1 8 -7 7749.5 169.5 1
 1 8 -7 7445.3 179.7 1
 1 8 -7 7724.9 160.9 4
 -1 -8 6 -25.913 60.464 1
 -1 -8 6 5.459 59.164 1
 -1 -8 6 2.736 52.812 4
 -1 -8 6 134.221 88.144 5
 1 8 -6 -52.58 56.732 1
 1 8 -6 86.244 100.962 1
 1 8 -6 -58.963 48.35 4
 -1 -8 5 -15.602 52.675 1
 -1 -8 5 47.984 95.432 1
 -1 -8 5 47.005 51.779 4
 -1 -8 5 81.308 47.959 5
 1 8 -5 118.767 59.596 1
 1 8 -5 73.619 61.614 1
 1 8 -5 55.649 52.942 4
 -1 -8 4 1919.7 122.5 1
 -1 -8 4 1599.4 127.7 1
 -1 -8 4 1732.4 117 4
 -1 -8 4 1839.5 104.6 5
 1 8 -4 1694.2 126.4 1
 1 8 -4 1760.9 119.6 1
 1 8 -4 1586.5 109.1 4
 -1 -8 3 359.924 66.295 1
 -1 -8 3 252.727 66.929 1
 -1 -8 3 324.869 60.783 4
 -1 -8 3 250.542 50.201 5
 1 8 -3 192.157 66.006 1
 1 8 -3 373.675 67.608 1
 1 8 -3 203.911 51.004 4
 -1 -8 2 365.986 67.932 1
 -1 -8 2 445.841 72.771 1
 -1 -8 2 238.675 61.814 4
 -1 -8 2 323.482 48.968 5
 1 8 -2 368.208 67.242 1
 1 8 -2 325.319 69.052 1
 1 8 -2 348.442 60.583 4
 -1 -8 1 626.967 75.162 1
 -1 -8 1 625.135 79.355 1
 -1 -8 1 575.262 68.925 4
 -1 -8 1 715.763 83.073 5
 1 8 -1 614.174 77.055 1
 1 8 -1 640.136 76.933 1
 1 8 -1 517.967 62.596 4
 -1 -8 0 -16.281 56.354 1
 -1 -8 0 6.3 64.074 1
 -1 -8 0 69.759 57.462 4
 -1 -8 0 38.59 39.788 5
 1 8 0 -6.315 62.612 1
 1 8 0 73.242 62.392 1
 1 8 0 10.005 50.473 4
 -1 -8 -1 1571 127 1
 -1 -8 -1 1345.3 131.5 1
 -1 -8 -1 1388 122.1 4
 -1 -8 -1 1492.9 81.2 5
 1 8 1 1264.6 124.5 1
 1 8 1 1527.5 130.3 1
 1 8 1 1496.9 108.6 4
 -1 -8 -2 1220 126 1
 -1 -8 -2 1107.7 130.5 1
 -1 -8 -2 1714.9 125.5 4
 -1 -8 -2 1268 75.6 5
 1 8 2 1005.7 121.8 1
 1 8 2 1492.8 137.4 1
 1 8 2 1535.2 110.6 4
 -1 -8 -3 50.182 68.065 1
 -1 -8 -3 88.905 69.668 1
 -1 -8 -3 183.266 63.808 4
 1 8 3 115.168 66.412 1
 1 8 3 219.007 74.31 1
 -1 -8 -4 80.159 69.283 1
 -1 -8 -4 -66.763 64.179 1
 -1 -8 -4 -42.445 60.688 4
 1 8 4 -63.282 66.677 1
 -1 -8 -5 -116.537 65.423 1
 -1 -8 -5 -16.59 65.495 1
 -1 -8 -5 -63.277 59.395 4
 1 8 5 -7.211 65.063 1
 1 8 5 -83.167 69.092 1
 -1 -8 -6 -128.192 66.161 1
 -1 -8 -6 -66.704 66.456 1
 -1 -8 -6 96.152 66.743 4
 1 8 6 23.861 65.094 1
 1 8 6 -200.633 68.15 1
 -1 -8 -7 61.073 73.324 1
 -1 -8 -7 -97.697 70.887 1
 -1 -8 -7 18.696 64.728 4
 1 8 7 59.473 72.658 1
 1 8 7 1.665 69.853 1
 -1 -8 -8 -67.083 72.352 1
 -1 -8 -8 88.936 78.536 1
 -1 -8 -8 -33.138 67.002 4
 1 8 8 61.915 69.048 1
 1 8 8 50.925 75.968 1
 -1 -8 -9 -66.858 79.453 1
 -1 -8 -9 88.408 78.421 1
 -1 -8 -9 17.862 76.883 4
 1 8 9 -87.964 68.937 1
 1 8 9 -89.497 78.097 1
 -1 -8 -10 -56.309 83.499 1
 -1 -8 -10 138.832 85.999 1
 -1 -8 -10 73.522 83.083 4
 1 8 10 -22.882 76.405 1
 1 8 10 -16.898 80.811 1
 -1 -8 -11 -76.438 83.36 1
 -1 -8 -11 -29.423 159.549 1
 -1 -8 -11 -154.6 80.289 4
 1 8 11 -186.622 72.536 1
 1 8 11 -112.408 82.744 1
 -1 -9 14 -144.846 84.113 1
 -1 -9 14 148.345 90.383 1
 -1 -9 14 69.781 82.563 5
 1 9 -14 276.332 89.673 1
 1 9 -14 -6.824 76.24 4
 -1 -9 13 23.797 83.863 1
 -1 -9 13 136.728 92.841 1
 -1 -9 13 -88.818 70.501 5
 1 9 -13 119.16 85.909 1
 1 9 -13 28.244 82.64 1
 1 9 -13 87.443 71.4 4
 -1 -9 12 229.181 86.094 1
 -1 -9 12 226.135 85.654 1
 -1 -9 12 240.9 80.764 5
 1 9 -12 214.474 84.983 1
 1 9 -12 214.864 75.083 4
 -1 -9 11 558.757 88.38 1
 -1 -9 11 230.621 80.797 1
 -1 -9 11 322.939 78.982 4
 -1 -9 11 307.801 76.258 5
 1 9 -11 275.355 82.556 1
 1 9 -11 333.26 90.551 1
 1 9 -11 309.214 74.734 4
 -1 -9 10 218.422 77.542 1
 -1 -9 10 -26.06 80.889 1
 -1 -9 10 230.401 73.194 4
 -1 -9 10 240.186 68.179 5
 1 9 -10 -6.977 75.568 1
 1 9 -10 146.051 80.499 1
 1 9 -10 241.235 74.522 4
 -1 -9 9 174.888 72.988 1
 -1 -9 9 185.263 61.448 1
 -1 -9 9 68.41 69.679 4
 -1 -9 9 156.035 67.778 5
 1 9 -9 224.426 66.274 1
 1 9 -9 253.712 82.716 1
 1 9 -9 225.091 68.773 4
 -1 -9 8 1235.1 137.9 1
 -1 -9 8 1148 132.4 1
 -1 -9 8 959.39 87.844 4
 -1 -9 8 1514.6 135.1 5
 1 9 -8 848.777 92.254 1
 1 9 -8 1238.1 149.3 1
 1 9 -8 1197.9 126.4 4
 -1 -9 7 83.964 70.89 1
 -1 -9 7 140.435 65.371 1
 -1 -9 7 99.343 66.005 4
 -1 -9 7 214.143 60.026 5
 1 9 -7 166.484 72.211 1
 1 9 -7 126.051 74.186 1
 1 9 -7 99.919 62.616 4
 -1 -9 6 257 76.012 1
 -1 -9 6 8.291 69.037 1
 -1 -9 6 44.448 64.312 4
 -1 -9 6 70.812 58.792 5
 1 9 -6 203.732 71.131 1
 1 9 -6 212.385 75.093 1
 1 9 -6 36.339 64.132 4
 -1 -9 5 1414.1 134.6 1
 -1 -9 5 1296.5 139.5 1
 -1 -9 5 1011.9 89.5 4
 -1 -9 5 1316.1 116.8 5
 1 9 -5 1448.7 135.5 1
 1 9 -5 1252.3 134.7 1
 1 9 -5 675.202 80.112 4
 -1 -9 4 150.783 71.869 1
 -1 -9 4 186.124 75.291 1
 -1 -9 4 -20.285 69.023 4
 -1 -9 4 113.411 55.879 5
 1 9 -4 188.171 74.771 1
 1 9 -4 55.896 69.826 1
 1 9 -4 -161.939 63.251 4
 -1 -9 3 380.997 78.935 1
 -1 -9 3 467.132 83.097 1
 -1 -9 3 321.89 74.002 4
 -1 -9 3 286.419 55.793 5
 1 9 -3 395.314 82.545 1
 1 9 -3 374.625 75.572 1
 1 9 -3 152.616 69.718 4
 -1 -9 2 529.822 81.895 1
 -1 -9 2 691.154 87.139 1
 -1 -9 2 545.299 82.919 4
 -1 -9 2 1012.4 102.5 5
 1 9 -2 1204.6 141 1
 1 9 -2 578.711 80.088 1
 1 9 -2 240.854 72.104 4
 -1 -9 1 4120.9 157.8 1
 -1 -9 1 4290.8 170 1
 -1 -9 1 4006.4 163.8 4
 -1 -9 1 4215.5 122 5
 1 9 -1 4168.8 160.8 1
 1 9 -1 4303.1 167.8 1
 1 9 -1 3562.5 148.1 4
 -1 -9 0 6360.4 180.5 1
 -1 -9 0 6930.4 195.2 1
 -1 -9 0 6822.4 185.4 4
 -1 -9 0 6135.9 129.5 5
 1 9 0 7077.4 190.6 1
 1 9 0 6525.6 229.7 1
 1 9 0 6182.1 169 4
 -1 -9 -1 624.409 91.457 1
 -1 -9 -1 652.216 91.531 1
 -1 -9 -1 757.481 88.373 4
 -1 -9 -1 821.349 91.82 5
 1 9 1 513.808 86.021 1
 1 9 1 490.187 156.194 1
 1 9 1 414.816 72.354 4
 -1 -9 -2 5061.5 186.1 1
 -1 -9 -2 4556.3 182.1 1
 -1 -9 -2 4723.4 168.6 4
 -1 -9 -2 4425.8 107.3 5
 1 9 2 4655.2 171.9 1
 -1 -9 -3 270.833 83.14 1
 -1 -9 -3 222.059 87.966 1
 -1 -9 -3 228.64 75.575 4
 1 9 3 161.908 78.473 1
 -1 -9 -4 346.947 90.172 1
 -1 -9 -4 376.579 91.297 1
 -1 -9 -4 417.704 83.723 4
 1 9 4 394.255 83.632 1
 1 9 4 294.725 147.071 1
 -1 -9 -5 102.108 86.102 1
 -1 -9 -5 -15.164 81.38 1
 -1 -9 -5 -32.086 76.716 4
 1 9 5 -46.822 77.258 1
 1 9 5 210.888 128.42 1
 -1 -9 -6 239.42 89.71 1
 -1 -9 -6 168.606 92.659 1
 -1 -9 -6 111.083 82.214 4
 1 9 6 98.726 79.155 1
 1 9 6 205.981 109.781 1
 -1 -9 -7 232.172 93.598 1
 -1 -9 -7 294.506 94.744 1
 -1 -9 -7 117.257 86.503 4
 1 9 7 420.375 90.465 1
 1 9 7 95.998 93.95 1
 -1 -9 -8 178.682 93.916 1
 -1 -9 -8 116.402 94.909 1
 -1 -9 -8 176.565 90.517 4
 1 9 8 -17.46 90.471 1
 1 9 8 -14.95 91.602 1
 -1 -10 11 -46.681 93.775 1
 -1 -10 11 -14.376 81.071 4
 -1 -10 11 127.784 81.645 5
 1 10 -11 111.469 95.425 1
 1 10 -11 103.884 78.731 4
 -1 -10 10 222.684 89.489 1
 -1 -10 10 -116.175 91.229 1
 -1 -10 10 221.005 83.174 4
 -1 -10 10 5.657 78.843 5
 1 10 -10 253.235 93.963 1
 1 10 -10 354.707 102.403 1
 1 10 -10 251.756 79.029 4
 -1 -10 9 -147.934 88.299 1
 -1 -10 9 51.267 84.5 1
 -1 -10 9 -50.868 74.078 4
 -1 -10 9 -105.308 71.153 5
 1 10 -9 27.139 80.213 1
 1 10 -9 26.061 88.743 1
 1 10 -9 33.843 69.823 4
 -1 -10 8 266.255 85.5 1
 -1 -10 8 -14.454 82.51 1
 -1 -10 8 -148.457 76.138 4
 -1 -10 8 163.571 72.563 5
 1 10 -8 3.419 89.375 1
 1 10 -8 53.493 69.126 4
 -1 -10 7 156.144 84.965 1
 -1 -10 7 -92.188 81.841 1
 -1 -10 7 -34.27 73.876 4
 -1 -10 7 -1.843 69.393 5
 1 10 -7 47.292 75.349 1
 1 10 -7 -50.208 87.126 1
 1 10 -7 -184.612 65.091 4
 -1 -10 6 214.568 88.3 1
 -1 -10 6 70.009 79.843 1
 -1 -10 6 28.352 76.897 4
 -1 -10 6 76.051 68.152 5
 1 10 -6 130.587 83.214 1
 1 10 -6 181.001 72.664 1
 1 10 -6 -4.338 67.78 4
 -1 -10 5 121.553 84.96 1
 -1 -10 5 238.211 86.743 1
 -1 -10 5 -146.97 72.64 4
 -1 -10 5 -59.773 61.522 5
 1 10 -5 57.991 77.531 1
 1 10 -5 4.754 84.494 1
 -1 -10 4 42.474 78.991 1
 -1 -10 4 -30.353 82.448 1
 -1 -10 4 83.712 63.79 5
 1 10 -4 90.063 80.723 1
 1 10 -4 36.767 89.459 1
 -1 -10 3 433.688 89.047 1
 -1 -10 3 404.174 91.246 1
 -1 -10 3 212.158 82.937 4
 -1 -10 3 398.906 68.357 5
 1 10 -3 592.229 100.373 1
 1 10 -3 345.746 91.614 1
 1 10 -3 19.889 74.031 4
 -1 -10 2 297.098 88.24 1
 -1 -10 2 214.335 92.924 1
 -1 -10 2 172.827 82.095 4
 -1 -10 2 408.434 63.908 5
 1 10 -2 328.705 91.521 1
 1 10 -2 527.829 95.393 1
 1 10 -2 27.82 72.718 4
 -1 -10 1 89.874 82.97 1
 -1 -10 1 192.147 92.079 1
 -1 -10 1 52.027 85.094 4
 -1 -10 1 132.814 74.258 5
 1 10 -1 267.263 94.134 1
 1 10 -1 220.658 94.194 1
 1 10 -1 56.352 72.311 4
 -1 -10 0 3638.9 179.2 1
 -1 -10 0 3870.9 203.1 1
 -1 -10 0 3385.7 182.7 4
 -1 -10 0 3403.2 127.7 5
 1 10 0 3584.2 186.6 1
 1 10 0 3575.3 198.1 1
 1 10 0 3538.3 161.7 4
 -1 -10 -1 961.274 115.196 1
 -1 -10 -1 963.749 117.422 1
 -1 -10 -1 1662.1 172.7 4
 -1 -10 -1 1169.9 106.4 5
 1 10 1 1706.2 171.2 1
 1 10 1 965.003 114.239 1
 -1 -10 -2 829.331 108.942 1
 -1 -10 -2 699.292 107.504 1
 -1 -10 -2 653.699 100.278 4
 1 10 2 777.608 105.092 1
 1 10 2 834.217 115.351 1
 -1 -10 -3 771.834 114.15 1
 -1 -10 -3 493.241 105.717 1
 -1 -10 -3 573.337 98.087 4
 1 10 3 545.479 108.927 1
 1 10 3 623.993 114.418 1
 -1 -10 -4 930.202 115.821 1
 -1 -10 -4 781.925 114.41 1
 -1 -10 -4 744.353 99.742 4
 1 10 4 875.732 111.016 1
 1 10 4 993.543 122.469 1
 -2 11 1 44.183 101.458 1
 -2 11 1 64.834 69.686 2
 -2 11 1 10.281 65.219 5
 2 -11 -1 63.191 104.961 1
 2 -11 -1 -73.401 104.407 1
 2 -11 -1 157.628 54.219 3
 2 -11 -1 204.24 72.023 4
 -2 11 0 -254.415 85.683 1
 -2 11 0 -85.788 92.285 1
 -2 11 0 188.597 71.971 2
 -2 11 0 12.875 65.604 5
 2 -11 0 -155.179 85.927 1
 2 -11 0 -49.092 96.056 1
 2 -11 0 6.645 69.274 3
 2 -11 0 -30.142 67.647 4
 -2 11 -1 -138.928 94.423 1
 -2 11 -1 -4.762 96.315 1
 -2 11 -1 299.793 138.259 2
 -2 11 -1 151.427 71.9 5
 2 -11 1 283.429 110.541 1
 2 -11 1 -56.615 92.394 1
 2 -11 1 -12.007 70.646 3
 2 -11 1 147.774 70.601 4
 -2 11 -2 512.604 107.203 1
 -2 11 -2 531.894 115.238 1
 -2 11 -2 417.262 76.013 5
 2 -11 2 466.955 92.221 1
 2 -11 2 425.887 105.378 1
 2 -11 2 479.483 82.994 3
 2 -11 2 320.498 70.804 4
 -2 11 -3 432.653 105.448 1
 -2 11 -3 353.962 107.944 1
 -2 11 -3 385.987 80.477 5
 2 -11 3 622.627 116.314 1
 2 -11 3 558.911 108.854 1
 2 -11 3 518.401 70.695 4
 -2 11 -4 357.189 103.691 1
 -2 11 -4 280.23 103.935 1
 -2 11 -4 114.091 59.051 4
 -2 11 -4 129.604 74.071 5
 2 -11 4 -77.776 94.807 1
 2 -11 4 374.048 106.899 1
 2 -11 4 192.755 65.623 4
 2 -11 4 294.921 79.197 5
 -2 11 -5 141.535 93.145 1
 -2 11 -5 228.547 107.034 1
 -2 11 -5 108.749 59.638 4
 -2 11 -5 64.079 74.051 5
 2 -11 5 321.595 95.163 1
 2 -11 5 199.489 103.164 1
 2 -11 5 127.776 66.464 4
 2 -11 5 15.243 72.387 5
 -2 11 -6 -31.9 94.558 1
 -2 11 -6 -107.793 94.886 1
 -2 11 -6 12.681 79.665 5
 2 -11 6 200.224 90.522 1
 2 -11 6 23.986 97.437 1
 2 -11 6 -19.256 71.154 4
 2 -11 6 -130.488 73.017 5
 -2 11 -7 62.573 101 1
 -2 11 -7 168.941 63.436 4
 -2 11 -7 125.252 79.058 5
 2 -11 7 207.537 98.749 1
 2 -11 7 348.186 101.472 1
 2 -11 7 164.352 80.113 5
 -2 10 7 111.684 106.807 1
 -2 10 7 -46.22 62.129 5
 2 -10 -7 29.397 104.451 1
 2 -10 -7 71.518 94.648 1
 2 -10 -7 -56.725 72.218 4
 -2 10 6 -7.585 87.457 1
 -2 10 6 116.374 95.411 1
 -2 10 6 219.3 110.209 5
 2 -10 -6 146.173 102.113 1
 2 -10 -6 187.272 103.276 1
 2 -10 -6 61.6 71.987 4
 -2 10 5 -216.22 78.057 1
 -2 10 5 32.078 87.261 1
 -2 10 5 91.153 66.696 5
 2 -10 -5 -106.522 86.523 1
 2 -10 -5 79.615 92.999 1
 2 -10 -5 -148.473 65.861 4
 -2 10 4 -46.032 80.036 1
 -2 10 4 123.803 91.164 1
 -2 10 4 221.007 51.894 2
 -2 10 4 1.189 55.565 5
 2 -10 -4 238.238 93.042 1
 2 -10 -4 179.337 92.045 1
 2 -10 -4 9.725 65.445 4
 -2 10 3 229.604 90.976 1
 -2 10 3 234.513 91.59 1
 -2 10 3 302.648 55.54 2
 -2 10 3 170.309 60.011 5
 2 -10 -3 206.674 91.49 1
 2 -10 -3 88.546 85.081 1
 2 -10 -3 246.531 46.1 3
 2 -10 -3 116.076 66.782 4
 -2 10 2 10.603 75.437 1
 -2 10 2 57.181 82.922 1
 -2 10 2 33.797 59.667 2
 -2 10 2 -66.047 59.334 5
 2 -10 -2 180.162 90.45 1
 2 -10 -2 36.932 82.591 1
 2 -10 -2 45.25 43.947 3
 2 -10 -2 64.791 71.032 4
 -2 10 1 196.885 78.958 1
 -2 10 1 39.476 82.024 1
 -2 10 1 19.52 60.416 2
 -2 10 1 59.321 57.723 5
 2 -10 -1 82.327 89.412 1
 2 -10 -1 15.823 81.249 1
 2 -10 -1 64.869 56.696 3
 2 -10 -1 116.237 59.882 4
 -2 10 0 -208.797 71.881 1
 -2 10 0 -47.268 81.041 1
 -2 10 0 131.703 64.925 2
 -2 10 0 -19.363 55.492 5
 2 -10 0 6.521 85.289 1
 2 -10 0 -138.94 79.443 1
 2 -10 0 27.692 58.962 3
 2 -10 0 145.936 56.245 4
 -2 10 -1 634.629 91.82 1
 -2 10 -1 450.573 92.267 1
 -2 10 -1 522.948 72.561 5
 2 -10 1 828.779 105.967 1
 2 -10 1 559.203 87.793 1
 2 -10 1 711.449 75.237 3
 2 -10 1 708.052 70.05 4
 -2 10 -2 370.454 86.107 1
 -2 10 -2 372.16 91.811 1
 -2 10 -2 609.38 72.242 5
 2 -10 2 727.945 101.074 1
 2 -10 2 575.013 93.683 1
 2 -10 2 518.68 62.595 4
 -2 10 -3 746.468 96.027 1
 -2 10 -3 730.631 100.123 1
 -2 10 -3 531.269 62.407 4
 -2 10 -3 724.228 79.884 5
 2 -10 3 507.056 83.742 1
 2 -10 3 620.732 94.929 1
 2 -10 3 1033.9 103.2 4
 2 -10 3 668.677 77.048 5
 -2 10 -4 2998.7 175.9 1
 -2 10 -4 3047.8 175.4 1
 -2 10 -4 2379.8 112.2 4
 -2 10 -4 2598.9 144 5
 2 -10 4 2975.8 167.9 1
 2 -10 4 3043.7 179.7 1
 2 -10 4 2823.9 120.1 4
 2 -10 4 2706.5 143.3 5
 -2 10 -5 3405 176.3 1
 -2 10 -5 2926.2 160.6 1
 -2 10 -5 2264.9 112.3 4
 -2 10 -5 3153.3 150 5
 2 -10 5 3456.7 166.6 1
 2 -10 5 3634.5 178.7 1
 2 -10 5 2758.2 121.3 4
 2 -10 5 3147.2 158.1 5
 -2 10 -6 281.117 81.258 1
 -2 10 -6 337.9 88.351 1
 -2 10 -6 75.92 54.609 4
 -2 10 -6 161.585 75.018 5
 2 -10 6 114.681 79.901 1
 2 -10 6 337.913 87.855 1
 2 -10 6 200.63 61.336 4
 2 -10 6 221.616 72.255 5
 -2 10 -7 388.016 83.184 1
 -2 10 -7 1247.5 149.6 1
 -2 10 -7 203.452 56.443 4
 -2 10 -7 361.542 75 5
 2 -10 7 367.07 89.072 1
 2 -10 7 321.401 87.573 1
 2 -10 7 379.971 79.685 5
 -2 10 -8 112.927 81.438 1
 -2 10 -8 -10.457 73.309 1
 -2 10 -8 32.658 71.45 5
 2 -10 8 4.176 83.423 1
 2 -10 8 25.426 80.733 1
 2 -10 8 -64.667 63.794 5
 -2 10 -9 114.116 80.707 1
 -2 10 -9 -41.447 81.626 1
 -2 10 -9 24.061 56.262 4
 -2 10 -9 -107.296 71.067 5
 2 -10 9 -80.236 78.644 1
 2 -10 9 -153.334 71.361 1
 2 -10 9 -193.561 65.132 5
 -2 10 -10 270.893 87.382 1
 -2 10 -10 238.745 83.009 1
 -2 10 -10 197.777 57.86 4
 -2 10 -10 -47.703 75.179 5
 2 -10 10 331.665 81.575 1
 2 -10 10 406.781 85.585 1
 2 -10 10 27.458 75.598 5
 -2 10 -11 -67.02 80.938 1
 -2 10 -11 22.609 58.47 4
 -2 10 -11 -196.287 67.791 5
 2 -10 11 31.899 81.993 1
 2 -10 11 -83.57 76.891 1
 2 -10 11 -81.805 71.944 5
 -2 10 -12 -12.326 82.419 1
 -2 10 -12 123.12 86.366 1
 -2 10 -12 37.541 63.424 4
 -2 10 -12 104.137 76.58 5
 2 -10 12 131.681 85.217 1
 2 -10 12 116.757 87.822 1
 2 -10 12 31.947 78.287 5
 -2 9 10 -51.033 94.582 1
 -2 9 10 137.404 109.971 1
 -2 9 10 132.995 55.865 5
 2 -9 -10 71.264 110.273 1
 2 -9 -10 -34.408 95.557 1
 2 -9 -10 72.742 77.292 4
 -2 9 9 -41.236 88.239 1
 -2 9 9 39.306 96.164 1
 -2 9 9 132.017 54.716 5
 2 -9 -9 178.35 105.356 1
 2 -9 -9 174.627 95.192 1
 2 -9 -9 -98.722 71.348 4
 -2 9 8 -86.542 73.767 1
 -2 9 8 70.364 90.529 1
 -2 9 8 78.027 53.421 5
 2 -9 -8 -41.151 93.139 1
 2 -9 -8 72.124 87.344 1
 2 -9 -8 80.332 68.759 4
 -2 9 7 221.065 80.692 1
 -2 9 7 335.791 90.393 1
 -2 9 7 121.176 54.287 5
 2 -9 -7 191.307 84.506 1
 2 -9 -7 243.549 85.973 1
 2 -9 -7 192.351 67.044 4
 -2 9 6 90.881 71.653 1
 -2 9 6 -9.848 80.117 1
 -2 9 6 -62.263 48.669 5
 2 -9 -6 -28.147 80.823 1
 2 -9 -6 -46.082 77.571 1
 2 -9 -6 126.778 101.968 4
 -2 9 5 295.271 79.284 1
 -2 9 5 217.268 77.028 1
 -2 9 5 94.913 53.203 5
 2 -9 -5 174.701 79.492 1
 2 -9 -5 -32.582 75.251 1
 2 -9 -5 115.833 57.93 4
 -2 9 4 -102.599 63.206 1
 -2 9 4 -49.376 72.254 1
 -2 9 4 57.475 44.5 2
 -2 9 4 -38.823 49.884 5
 2 -9 -4 -55.367 77.033 1
 2 -9 -4 15.506 64.885 1
 2 -9 -4 -81.422 51.768 4
 -2 9 3 204.61 69.923 1
 -2 9 3 82.686 76.565 1
 -2 9 3 322.269 54.661 2
 -2 9 3 150.958 55.839 5
 2 -9 -3 152.775 73.768 1
 2 -9 -3 239.547 76.574 1
 2 -9 -3 214.471 39.54 3
 2 -9 -3 264.243 57.667 4
 -2 9 2 1159.3 129.5 1
 -2 9 2 1634.3 144.9 1
 -2 9 2 1444.8 87.8 2
 -2 9 2 1324.6 110 5
 2 -9 -2 2094.4 147.8 1
 2 -9 -2 1764.2 145.4 1
 2 -9 -2 1355.7 77.3 3
 2 -9 -2 1164 102.5 4
 -2 9 1 1956.2 141 1
 -2 9 1 2005.2 144.8 1
 -2 9 1 1752.2 97.9 2
 -2 9 1 1714.8 114.9 5
 2 -9 -1 1685.4 140 1
 2 -9 -1 1689.2 140.1 1
 2 -9 -1 1554.3 82.9 3
 2 -9 -1 1759.3 105.4 4
 -2 9 0 324.57 74.634 1
 -2 9 0 172.068 73.435 1
 -2 9 0 260.231 100.767 5
 2 -9 0 309.418 80.353 1
 2 -9 0 254.158 69.647 1
 2 -9 0 278.987 56.102 3
 2 -9 0 259.03 54.799 4
 -2 9 -1 77.255 65.333 1
 -2 9 -1 278.692 75.421 1
 -2 9 -1 154.333 58.181 5
 2 -9 1 163.37 64.39 1
 2 -9 1 49.003 70.149 1
 2 -9 1 162.43 50.838 4
 -2 9 -2 1365.3 129.3 1
 -2 9 -2 1363.6 132.7 1
 -2 9 -2 1051.3 84.9 4
 -2 9 -2 1363.3 114.3 5
 2 -9 2 1184.5 155.7 1
 2 -9 2 1763.1 141.4 1
 2 -9 2 1275.3 93.8 4
 2 -9 2 1517 113 5
 -2 9 -3 1194.3 124.9 1
 -2 9 -3 1074.6 132.4 1
 -2 9 -3 851.984 83.251 4
 -2 9 -3 1278.6 119.2 5
 2 -9 3 1311.2 128.5 1
 2 -9 3 1267.2 139.6 1
 2 -9 3 1177.6 91.2 4
 2 -9 3 1226.3 114.1 5
 -2 9 -4 4552.9 209.6 1
 -2 9 -4 4855.9 160.6 1
 -2 9 -4 4416.6 109.5 4
 -2 9 -4 4384.4 147.2 5
 2 -9 4 4862.6 159.8 1
 2 -9 4 4860.6 164.2 1
 2 -9 4 4547.5 115.8 4
 2 -9 4 4702 150 5
 -2 9 -5 736.244 133.607 1
 -2 9 -5 556.176 82.597 1
 -2 9 -5 334.717 48.857 4
 -2 9 -5 421.369 65.684 5
 2 -9 5 618.373 81.386 1
 2 -9 5 528.583 81.844 1
 2 -9 5 361.098 54.607 4
 2 -9 5 398.527 67.976 5
 -2 9 -6 676.805 102.138 1
 -2 9 -6 1202.2 132.9 1
 -2 9 -6 530.398 55.037 4
 -2 9 -6 628.567 73.358 5
 2 -9 6 707.575 84.068 1
 2 -9 6 858.361 88.142 1
 2 -9 6 692.171 63.461 4
 2 -9 6 683.854 75.4 5
 -2 9 -7 1965 160 1
 -2 9 -7 2017.6 134.6 1
 -2 9 -7 1972.5 98.1 4
 -2 9 -7 2264.9 137.4 5
 2 -9 7 2225.7 135.6 1
 2 -9 7 2508.6 144.3 1
 2 -9 7 1751.5 128.1 5
 -2 9 -8 85.082 68.12 1
 -2 9 -8 83.718 69.323 1
 -2 9 -8 45.705 48.096 4
 -2 9 -8 -18.394 62.334 5
 2 -9 8 158.245 65.802 1
 2 -9 8 57.208 67.649 1
 2 -9 8 -134.903 54.481 5
 -2 9 -9 405.534 85.191 1
 -2 9 -9 185.038 69.217 1
 -2 9 -9 197.623 53.621 4
 -2 9 -9 278.292 65.581 5
 2 -9 9 251.338 76.42 1
 2 -9 9 273.318 73.514 1
 2 -9 9 211.563 64.547 5
 -2 9 -10 103.039 86.241 1
 -2 9 -10 227.148 72.513 1
 -2 9 -10 153.515 51.537 4
 -2 9 -10 75.33 66.496 5
 2 -9 10 160.276 68.151 1
 2 -9 10 277.605 71.38 1
 2 -9 10 29.918 62.656 5
 -2 9 -11 -123.78 124.539 1
 -2 9 -11 133.499 74.313 1
 -2 9 -11 68.196 92.876 4
 -2 9 -11 21.31 71.602 5
 2 -9 11 271.724 72.119 1
 2 -9 11 103.66 67.783 1
 2 -9 11 -2.166 68.856 5
 -2 9 -12 1094.8 163.3 1
 -2 9 -12 1817.7 146 1
 -2 9 -12 1683.4 111.6 4
 -2 9 -12 1239.1 97.7 5
 2 -9 12 1718.6 135.6 1
 2 -9 12 1528.1 140.4 1
 2 -9 12 1017.4 88.8 5
 -2 9 -13 103.652 78.903 1
 -2 9 -13 180.412 78.744 1
 -2 9 -13 279.463 62.686 4
 -2 9 -13 66.929 69.918 5
 2 -9 13 130.598 72.702 1
 2 -9 13 65.018 73.285 1
 2 -9 13 87.341 72.312 5
 -2 9 -14 188.004 82.393 1
 -2 9 -14 90.326 65.949 4
 -2 9 -14 57.607 71.535 5
 2 -9 14 228.578 79.092 1
 2 -9 14 216.014 82.836 1
 2 -9 14 181.898 80.307 5
 -2 9 -15 148.3 83.741 1
 -2 9 -15 386.961 93.603 1
 -2 9 -15 223.387 70.607 4
 -2 9 -15 47.785 76.4 5
 2 -9 15 231.882 94.126 1
 2 -9 15 189.322 81.623 5
 -2 8 13 -248.719 106.79 1
 -2 8 13 66.265 53.467 5
 2 -8 -13 74.057 102.796 1
 2 -8 -13 -60.33 103.669 1
 2 -8 -13 -22.158 82.756 4
 -2 8 12 158.696 97.697 1
 -2 8 12 152.12 88.229 1
 -2 8 12 89.523 53.989 5
 2 -8 -12 -111.277 102.526 1
 2 -8 -12 295.763 107.904 1
 2 -8 -12 64.566 78.83 4
 -2 8 11 199.976 95.692 1
 -2 8 11 136.256 101.28 1
 -2 8 11 106.653 51.949 5
 2 -8 -11 115.331 95.674 1
 2 -8 -11 118.008 86.429 1
 2 -8 -11 19.606 68.257 4
 -2 8 10 64.228 77.164 1
 -2 8 10 66.687 86.274 1
 -2 8 10 4.146 46.56 5
 2 -8 -10 217.203 89.042 1
 2 -8 -10 -44.264 82.992 1
 2 -8 -10 4.606 61.466 4
 -2 8 9 44.97 76.57 1
 -2 8 9 125.64 79.518 1
 -2 8 9 41.653 48.727 5
 2 -8 -9 186.585 84.864 1
 2 -8 -9 190.711 83.804 1
 2 -8 -9 145.566 61.684 4
 -2 8 8 101.281 74.106 1
 -2 8 8 91.318 72.333 1
 -2 8 8 -8.3 45.801 5
 2 -8 -8 22.187 79.938 1
 2 -8 -8 77.384 72.515 1
 2 -8 -8 -4.807 66.831 4
 -2 8 7 1.369 65.089 1
 -2 8 7 119.248 73.503 1
 -2 8 7 64.539 46.465 5
 2 -8 -7 -68.486 66.622 1
 2 -8 -7 90.232 69.085 1
 2 -8 -7 -45.682 53.943 4
 -2 8 6 286.824 69.681 1
 -2 8 6 138.571 71.548 1
 -2 8 6 185.549 50.12 5
 2 -8 -6 232.213 69.083 1
 2 -8 -6 126.239 66.998 1
 2 -8 -6 323.29 59.156 4
 -2 8 5 33.153 62.93 1
 -2 8 5 198.402 68.689 1
 -2 8 5 163.06 40.119 2
 -2 8 5 39.204 46.158 5
 2 -8 -5 75.061 66.481 1
 2 -8 -5 170 65.489 1
 2 -8 -5 82.503 51.966 4
 -2 8 4 145.667 62.001 1
 -2 8 4 178.856 64.73 1
 -2 8 4 222.63 44.885 2
 -2 8 4 117.849 48.668 5
 2 -8 -4 206.18 70.583 1
 2 -8 -4 209.387 66.199 1
 2 -8 -4 166.438 30.591 3
 2 -8 -4 123.284 49.479 4
 -2 8 3 -92.347 58.018 1
 -2 8 3 -2.205 57.6 1
 -2 8 3 1.218 43.796 2
 -2 8 3 -1.339 43.793 5
 2 -8 -3 22.586 73.217 1
 2 -8 -3 -48.663 57.836 1
 2 -8 -3 32.284 31.538 3
 2 -8 -3 21.351 45.211 4
 -2 8 2 1114.6 121 1
 -2 8 2 1076.4 78.8 2
 -2 8 2 994.532 94.523 5
 2 -8 -2 1199.4 119 1
 2 -8 -2 974.711 113.612 1
 2 -8 -2 974.989 64.336 3
 2 -8 -2 1021.1 86.1 4
 -2 8 1 -36.158 52.105 1
 -2 8 1 -34.565 66.373 1
 -2 8 1 67.094 47.889 2
 -2 8 1 -26.786 43.252 5
 2 -8 -1 9.651 57.233 1
 2 -8 -1 23.427 57.972 1
 2 -8 -1 42.502 41.257 3
 2 -8 -1 -1.577 42.611 4
 -2 8 0 1034.2 116 1
 -2 8 0 799.331 98.237 1
 -2 8 0 632.749 59.297 5
 2 -8 0 640.126 67.537 1
 2 -8 0 721.114 76.979 1
 2 -8 0 980.205 82.165 4
 -2 8 -1 319.719 63.841 1
 -2 8 -1 224.378 78.527 1
 -2 8 -1 329.048 42.43 4
 -2 8 -1 255.332 53.054 5
 2 -8 1 341.282 60.211 1
 2 -8 1 360.082 66.338 1
 2 -8 1 305.837 45.017 4
 -2 8 -2 1724.7 116.9 1
 -2 8 -2 1654.1 128.2 1
 -2 8 -2 1838.5 79.4 4
 -2 8 -2 1808 106.9 5
 2 -8 2 1883.4 115.5 1
 2 -8 2 1765 122.3 1
 2 -8 2 1874.3 84.9 4
 2 -8 2 1908.2 103.9 5
 -2 8 -3 161.332 60.64 1
 -2 8 -3 109.363 60.611 1
 -2 8 -3 38.077 36.95 4
 -2 8 -3 110.885 48.61 5
 2 -8 3 110.954 58.111 1
 2 -8 3 166.152 57.305 1
 2 -8 3 87.171 40.491 4
 2 -8 3 72.282 47.283 5
 -2 8 -4 -85.425 55.058 1
 -2 8 -4 14.025 56.844 1
 -2 8 -4 -26.608 34.121 4
 -2 8 -4 81.725 49.361 5
 2 -8 4 43.327 56.239 1
 2 -8 4 -2.244 56.008 1
 2 -8 4 13.245 39.5 4
 2 -8 4 24.872 81.362 5
 -2 8 -5 2200.4 128.7 1
 -2 8 -5 2120.1 123.4 1
 -2 8 -5 2032.9 83.7 4
 -2 8 -5 1921 169.1 5
 2 -8 5 1986.1 117.1 1
 2 -8 5 1969 124.4 1
 2 -8 5 2066.4 90.7 4
 2 -8 5 1941.6 111.3 5
 -2 8 -6 15771.9 209.6 1
 -2 8 -6 15045.1 200.9 1
 -2 8 -6 14931.8 154.5 4
 -2 8 -6 14742.3 203 5
 2 -8 6 15009 202.5 1
 2 -8 6 15594.1 206.6 1
 2 -8 6 15103.9 160.9 4
 2 -8 6 15041.4 203.7 5
 -2 8 -7 1288.4 123.1 1
 -2 8 -7 1331.1 113.8 1
 -2 8 -7 1017.5 83.3 4
 -2 8 -7 1163.5 115.8 5
 2 -8 7 1523.7 119.1 1
 2 -8 7 1346.5 121 1
 2 -8 7 1171.8 115.1 5
 -2 8 -8 2603.1 133.1 1
 -2 8 -8 2495.3 124.1 1
 -2 8 -8 2387.7 96.3 4
 -2 8 -8 2673.9 128.7 5
 2 -8 8 2452.2 127.2 1
 2 -8 8 2337.5 127.8 1
 2 -8 8 2779.6 129.6 5
 -2 8 -9 6940.4 163.1 1
 -2 8 -9 6800.6 160.6 1
 -2 8 -9 6550.9 128.3 4
 -2 8 -9 7014.5 170 5
 2 -8 9 6752.5 159.8 1
 2 -8 9 6351.1 155.8 1
 2 -8 9 6995.9 167.6 5
 -2 8 -10 17129.3 218.9 1
 -2 8 -10 17510.7 223.6 1
 -2 8 -10 16662.7 182.7 4
 -2 8 -10 17059.7 232.9 5
 2 -8 10 16904.6 216.4 1
 2 -8 10 16733.2 216.4 1
 2 -8 10 17500 233.6 5
 -2 8 -11 1386.4 128.3 1
 -2 8 -11 1890.2 128.4 1
 -2 8 -11 1618.5 106 4
 -2 8 -11 1937.8 139 5
 2 -8 11 1779.2 121.8 1
 2 -8 11 1654.3 123.9 1
 2 -8 11 1728.8 132 5
 -2 8 -12 194.397 69.357 1
 -2 8 -12 338.439 70.618 1
 -2 8 -12 89.061 51.942 4
 -2 8 -12 151.508 66.407 5
 2 -8 12 267.83 68.144 1
 2 -8 12 112.653 61.466 1
 2 -8 12 233.196 65.923 5
 -2 8 -13 103.548 69.776 1
 -2 8 -13 264.35 70.046 1
 -2 8 -13 112.425 63.517 4
 -2 8 -13 196.773 64.441 5
 2 -8 13 287.184 70.195 1
 2 -8 13 206.246 68.342 1
 2 -8 13 298.664 72.32 5
 -2 8 -14 343.334 75.876 1
 -2 8 -14 178.078 59.665 4
 -2 8 -14 377.728 73.53 5
 2 -8 14 173.408 70.703 1
 2 -8 14 287.667 77.846 1
 2 -8 14 319.803 75.132 5
 -2 8 -15 -29.794 66.983 1
 -2 8 -15 7.801 63.874 1
 -2 8 -15 -40.71 69.192 5
 2 -8 15 -50.4 64.844 1
 2 -8 15 43.654 70.283 1
 2 -8 15 70.608 68.777 5
 -2 8 -16 -32.61 73.819 1
 -2 8 -16 8.611 66.135 1
 -2 8 -16 -16.35 61.807 4
 -2 8 -16 -121.199 73.581 5
 2 -8 16 43.415 72.801 1
 2 -8 16 -99.563 71.341 1
 2 -8 16 -24.842 73.934 5
 -2 8 -17 163.101 81.884 1
 -2 8 -17 139.71 81.84 1
 -2 8 -17 83.689 70.296 4
 -2 8 -17 19.483 78.773 5
 2 -8 17 57.001 72.806 1
 2 -8 17 119.834 85.813 1
 2 -8 17 78.285 83.401 3
 2 -8 17 150.26 81.257 5
 -2 7 15 283.141 110.918 1
 -2 7 15 12.672 109.457 1
 -2 7 15 24.298 52.151 5
 2 -7 -15 49.551 119.445 1
 2 -7 -15 -159.274 101.182 1
 2 -7 -15 -33.083 85.122 4
 -2 7 14 206.966 98.77 1
 -2 7 14 47.348 103.105 1
 -2 7 14 49.225 52.658 5
 2 -7 -14 -102.075 107.226 1
 2 -7 -14 -29.466 96.66 1
 2 -7 -14 -113.16 75.668 4
 -2 7 13 206.526 90.648 1
 -2 7 13 180.57 101.703 1
 -2 7 13 64.063 49.298 5
 2 -7 -13 -71.2 90.422 1
 2 -7 -13 2.958 91.416 1
 2 -7 -13 -5.535 72.469 4
 -2 7 12 39.724 86.221 1
 -2 7 12 -39.795 76.439 1
 -2 7 12 29.075 45.697 5
 2 -7 -12 48.602 86.778 1
 2 -7 -12 -16.489 83.191 1
 2 -7 -12 -76.08 68.237 4
 -2 7 11 385.239 88.509 1
 -2 7 11 326.995 95.288 1
 -2 7 11 306.325 51.619 5
 2 -7 -11 349.607 92.991 1
 2 -7 -11 185.772 92.194 1
 2 -7 -11 326.295 70.624 4
 -2 7 10 1221 147.8 1
 -2 7 10 1446.2 145.6 1
 -2 7 10 884.21 89.665 5
 2 -7 -10 1363.2 151.2 1
 2 -7 -10 955.879 100.278 1
 -2 7 9 448.094 84.304 1
 -2 7 9 398.392 80.09 1
 -2 7 9 217.45 48.882 5
 2 -7 -9 539.422 83.802 1
 2 -7 -9 297.984 75.013 1
 2 -7 -9 216.2 59.303 4
 -2 7 8 118.065 67.414 1
 -2 7 8 54.197 89.606 1
 -2 7 8 18.857 42.689 5
 2 -7 -8 29.577 67.64 1
 2 -7 -8 110.847 67.837 1
 2 -7 -8 -95.483 52.182 4
 -2 7 7 324.927 71.646 1
 -2 7 7 205.866 70.704 1
 -2 7 7 121.441 44.685 5
 2 -7 -7 165.43 60.469 1
 2 -7 -7 221.463 62.859 1
 2 -7 -7 114.738 48.964 4
 -2 7 6 -88.864 55.13 1
 -2 7 6 -14.429 58.103 1
 -2 7 6 16.534 37.41 2
 -2 7 6 -32.002 38.297 5
 2 -7 -6 -70.421 56.681 1
 2 -7 -6 -27.814 45.193 4
 -2 7 5 10.582 53.547 1
 -2 7 5 35.353 53.319 1
 -2 7 5 0.597 35.41 2
 -2 7 5 -17.064 41.356 5
 2 -7 -5 2.898 57.062 1
 2 -7 -5 79.385 53.589 1
 2 -7 -5 -59.313 42.808 4
 -2 7 4 64.762 52.427 1
 -2 7 4 -2.732 48.987 1
 -2 7 4 -25.984 37.511 2
 -2 7 4 -28.446 39.156 5
 2 -7 -4 48.585 55.03 1
 2 -7 -4 11.751 55.543 1
 2 -7 -4 -4.74 24.562 3
 2 -7 -4 4.589 40.331 4
 -2 7 3 -2.936 49.073 1
 -2 7 3 144.915 55.779 1
 -2 7 3 63.965 37.801 2
 -2 7 3 -32.62 40.192 5
 2 -7 -3 84.226 59.685 1
 2 -7 -3 1.585 52.214 1
 2 -7 -3 46.831 47.01 3
 2 -7 -3 21.126 39.541 4
 -2 7 2 1432.5 101.5 1
 -2 7 2 1682.2 106.7 1
 -2 7 2 1328.5 73.7 2
 -2 7 2 1380.1 89.6 5
 2 -7 -2 1594.7 109.3 1
 2 -7 -2 1497.7 108 1
 2 -7 -2 1440.4 59.3 3
 2 -7 -2 1494.8 77.2 4
 -2 7 1 -11.431 46.534 1
 -2 7 1 63.708 52.401 1
 -2 7 1 94.024 43.289 2
 -2 7 1 4.152 40.931 5
 2 -7 -1 16.999 53.711 1
 2 -7 -1 5.038 50.508 1
 2 -7 -1 100.795 35.735 3
 2 -7 -1 30.123 35.572 4
 -2 7 0 3547.6 114.8 1
 -2 7 0 3738.9 119.6 1
 -2 7 0 3659.4 107.9 5
 2 -7 0 3766.9 119.6 1
 2 -7 0 3784.4 121.7 1
 2 -7 0 3616.9 80.9 3
 2 -7 0 3744.2 86.6 4
 -2 7 -1 272.093 52.426 1
 -2 7 -1 267.357 54.403 1
 -2 7 -1 215.829 34.036 4
 -2 7 -1 224.887 44.021 5
 2 -7 1 305.488 57.62 1
 2 -7 1 308.055 53.32 1
 2 -7 1 335.867 38.788 4
 2 -7 1 140.232 42.615 5
 -2 7 -2 411.168 58.691 1
 -2 7 -2 325.822 52.493 1
 -2 7 -2 384.622 37.222 4
 -2 7 -2 267.573 47.216 5
 2 -7 2 329.834 51.115 1
 2 -7 2 405.691 57.256 1
 2 -7 2 425.452 41.37 4
 2 -7 2 399.853 50.376 5
 -2 7 -3 1605.9 99.5 1
 -2 7 -3 1744.8 101.5 1
 -2 7 -3 1577 65.5 4
 -2 7 -3 1531 93.5 5
 2 -7 3 1605.4 94.7 1
 2 -7 3 1682.8 99.2 1
 2 -7 3 1565 69.5 4
 2 -7 3 1649.9 90.6 5
 -2 7 -4 -4.191 46.318 1
 -2 7 -4 36.549 47.516 1
 -2 7 -4 -68.496 29.726 4
 -2 7 -4 -42.93 39.519 5
 2 -7 4 -5.702 39.906 1
 2 -7 4 -17.316 43.544 1
 2 -7 4 -20.75 32.036 4
 2 -7 4 22.613 40.06 5
 -2 7 -5 186.882 54.276 1
 -2 7 -5 76.396 47.224 1
 -2 7 -5 142.424 34.767 4
 -2 7 -5 93.084 44.575 5
 2 -7 5 61.17 50.169 1
 2 -7 5 173.522 53.852 1
 2 -7 5 159.368 38.851 4
 2 -7 5 76.257 41.406 5
 -2 7 -6 1071.9 99.1 1
 -2 7 -6 803.495 89.095 1
 -2 7 -6 1041.1 68.2 4
 -2 7 -6 864.762 93.736 5
 2 -7 6 873.193 93.663 1
 2 -7 6 982.367 99.989 1
 2 -7 6 1134.6 95 5
 -2 7 -7 5544.9 138.2 1
 -2 7 -7 5273 128.2 1
 -2 7 -7 5557.3 100.8 4
 -2 7 -7 5415.4 137.2 5
 2 -7 7 5134.5 129.2 1
 2 -7 7 4217.7 195.6 1
 2 -7 7 5382.4 136.4 5
 -2 7 -8 10166.6 165.2 1
 -2 7 -8 10046.1 179 1
 -2 7 -8 9671 128.5 4
 -2 7 -8 9465.5 233.9 5
 2 -7 8 9638 159.5 1
 2 -7 8 9542.7 162.2 1
 2 -7 8 9105.5 199.4 5
 -2 7 -9 9858.2 163.3 1
 -2 7 -9 9550.6 183.4 1
 -2 7 -9 9340.6 134 4
 -2 7 -9 9856.8 172.7 5
 2 -7 9 9212.3 157.9 1
 2 -7 9 9230.4 158.7 1
 2 -7 9 9807.6 171.6 5
 -2 7 -10 222.486 63.343 1
 -2 7 -10 201.414 63.462 1
 -2 7 -10 210.318 47.12 4
 -2 7 -10 295.214 57.909 5
 2 -7 10 94.544 59.362 1
 2 -7 10 128.539 62.307 1
 2 -7 10 354.117 60.646 5
 -2 7 -11 11836.3 178.1 1
 -2 7 -11 11859.1 181.8 1
 -2 7 -11 11398.6 154.9 4
 -2 7 -11 12194.5 195.9 5
 2 -7 11 11584.1 176.7 1
 2 -7 11 11721 177 1
 2 -7 11 12542.7 198.3 5
 -2 7 -12 10827.2 178.9 1
 -2 7 -12 10886.2 176.7 1
 -2 7 -12 10733.6 158.7 4
 -2 7 -12 11045.1 198.8 5
 2 -7 12 10715.2 175.5 1
 2 -7 12 10663.5 174 1
 2 -7 12 10870 192.9 5
 -2 7 -13 2294.8 119.5 1
 -2 7 -13 1982.6 105.6 4
 -2 7 -13 1907.8 135 5
 2 -7 13 2009.2 115.4 1
 2 -7 13 1926.7 118.6 1
 2 -7 13 2200 132.5 5
 -2 7 -14 485.193 71.019 1
 -2 7 -14 282.085 61.149 1
 -2 7 -14 357.368 101.45 4
 -2 7 -14 307.341 67.506 5
 2 -7 14 336.44 64.002 1
 2 -7 14 415.106 70.914 1
 2 -7 14 389.504 64.956 5
 -2 7 -15 185.581 62.093 1
 -2 7 -15 211.263 65.902 1
 -2 7 -15 234.691 60.635 4
 -2 7 -15 107.723 62.763 5
 2 -7 15 154.27 62.963 1
 2 -7 15 222.974 66.961 1
 2 -7 15 182.799 67.707 3
 2 -7 15 199.077 62.288 5
 -2 7 -16 599.765 80.109 1
 -2 7 -16 372.97 71.274 1
 -2 7 -16 299.493 70.459 4
 -2 7 -16 380.085 76.17 5
 2 -7 16 483.832 72.384 1
 2 -7 16 505.136 81.464 1
 2 -7 16 286.169 72.939 3
 2 -7 16 551.282 73.053 5
 -2 7 -17 460.411 82.351 1
 -2 7 -17 190.755 74.666 1
 -2 7 -17 146.842 69.036 4
 -2 7 -17 298.502 72.698 5
 2 -7 17 375.312 77.529 1
 2 -7 17 372.573 83.406 1
 2 -7 17 219.787 132.67 3
 2 -7 17 252.119 71.929 5
 -2 7 -18 1178.6 138.8 1
 -2 7 -18 1873.9 154.7 1
 -2 7 -18 1402.9 152.2 4
 2 -7 18 1247.7 133.5 1
 2 -7 18 1736 154.2 1
 2 -7 18 1314.4 131.7 3
 2 -7 18 1808.8 157.6 5
 -2 6 16 473.129 110.605 1
 -2 6 16 299.023 131.048 1
 -2 6 16 115.57 53.089 5
 2 -6 -16 78.011 102.809 1
 2 -6 -16 296.995 110.285 1
 -2 6 15 49.912 95.889 1
 -2 6 15 7.801 100.012 1
 -2 6 15 -125.948 45.623 5
 2 -6 -15 -173.69 84.699 1
 2 -6 -15 123.661 96.693 1
 -2 6 14 529.695 99.106 1
 -2 6 14 781.876 103.964 1
 -2 6 14 409.471 52.629 5
 2 -6 -14 558.238 91.827 1
 2 -6 -14 595.584 108 1
 2 -6 -14 363.351 80.503 4
 -2 6 13 37.666 86.773 1
 -2 6 13 117.495 82.942 1
 -2 6 13 78.932 46.199 5
 2 -6 -13 -19.712 77.597 1
 2 -6 -13 -86.765 87.472 1
 2 -6 -13 -82.562 64.27 4
 -2 6 12 5153.1 177.7 1
 -2 6 12 5373.2 179 1
 -2 6 12 4264.4 112.1 5
 2 -6 -12 5255.9 180.3 1
 2 -6 -12 5286 182.6 1
 2 -6 -12 4752.6 149.4 4
 -2 6 11 3074.1 151.3 1
 -2 6 11 2942.1 254.9 1
 -2 6 11 2556 98.8 5
 2 -6 -11 3075.6 155.5 1
 2 -6 -11 3142.1 159.3 1
 2 -6 -11 2887.2 126.8 4
 -2 6 10 658.629 79.82 1
 -2 6 10 684.948 84.764 1
 -2 6 10 676.842 82.647 5
 2 -6 -10 703.696 85.284 1
 2 -6 -10 584.818 145.205 1
 2 -6 -10 644.483 67.184 4
 -2 6 9 2147.4 131.8 1
 -2 6 9 2339.8 134.5 1
 -2 6 9 1739 90.5 5
 2 -6 -9 2038 212.1 1
 2 -6 -9 2188.3 130.1 1
 2 -6 -9 1765.2 108.5 4
 -2 6 8 668.656 84.909 1
 -2 6 8 619.559 74.313 1
 -2 6 8 408.117 49.865 5
 2 -6 -8 1000.8 115 1
 2 -6 -8 691.238 77.07 1
 2 -6 -8 507.715 57.447 4
 -2 6 7 222.19 60.965 1
 -2 6 7 263.483 54.491 1
 -2 6 7 127.844 41.914 5
 2 -6 -7 200.788 58.453 1
 2 -6 -7 218.755 58.234 1
 2 -6 -7 160.476 45.893 4
 -2 6 6 1693.9 109.9 1
 -2 6 6 1705.3 108.7 1
 -2 6 6 1538.9 67.2 2
 -2 6 6 1749.4 84.1 5
 2 -6 -6 1662.2 108.2 1
 2 -6 -6 1620 111.2 1
 2 -6 -6 1639.9 83.7 4
 -2 6 5 4409.1 127.4 1
 -2 6 5 4418.5 122.4 1
 -2 6 5 4028.6 78.8 2
 -2 6 5 4074.3 98.4 5
 2 -6 -5 4060.7 122.1 1
 2 -6 -5 4323 127.8 1
 2 -6 -5 4067.5 95.3 4
 -2 6 4 10.043 46.574 1
 -2 6 4 -2.011 44.868 1
 -2 6 4 -51.814 32.569 2
 -2 6 4 15.775 35.45 5
 2 -6 -4 -17.025 47.424 1
 2 -6 -4 64.665 50.828 1
 2 -6 -4 -0.06421 21.1911 3
 2 -6 -4 -14.294 34.062 4
 -2 6 3 1509.6 93.5 1
 -2 6 3 1495.4 90.4 1
 -2 6 3 1380.3 63.5 2
 -2 6 3 1387.7 77.3 5
 2 -6 -3 1502.5 96.5 1
 2 -6 -3 1532.9 92.5 1
 2 -6 -3 1310.1 44.7 3
 2 -6 -3 1488.6 69.6 4
 -2 6 2 2603.6 98.6 1
 -2 6 2 2631.3 98.6 1
 -2 6 2 2228.3 71.3 2
 -2 6 2 2389 84.6 5
 2 -6 -2 2625.2 100.1 1
 2 -6 -2 2414.3 96.9 1
 2 -6 -2 2253 70 4
 -2 6 1 845.536 77.787 1
 -2 6 1 779.386 81.268 1
 -2 6 1 654.936 62.801 2
 -2 6 1 683.817 70.307 5
 2 -6 -1 765.573 82.625 1
 2 -6 -1 727.823 79.685 1
 2 -6 -1 713.094 49.839 3
 2 -6 -1 591.824 55.425 4
 -2 6 0 -11.33 40.428 1
 -2 6 0 22.047 37.647 1
 -2 6 0 -29.174 32.124 5
 2 -6 0 -35.459 36.444 1
 2 -6 0 6.224 39.223 1
 2 -6 0 -32.928 28.805 3
 2 -6 0 5.857 26.859 4
 -2 6 -1 3.05 38.725 1
 -2 6 -1 45.985 40.039 1
 -2 6 -1 6.218 22.622 4
 -2 6 -1 28.836 32.945 5
 2 -6 1 55.803 40.121 1
 2 -6 1 30.495 37.614 1
 2 -6 1 18.591 29.746 3
 2 -6 1 14.828 26.853 4
 2 -6 1 16.695 31.431 5
 -2 6 -2 -5.226 35.895 1
 -2 6 -2 -10.858 38.703 1
 -2 6 -2 1.462 22.042 4
 -2 6 -2 -36.164 32.596 5
 2 -6 2 -10.077 38.308 1
 2 -6 2 -4.901 35.264 1
 2 -6 2 -17.108 26.727 4
 2 -6 2 -30.921 30.814 5
 -2 6 -3 -10.242 36.372 1
 -2 6 -3 2.475 36.967 1
 -2 6 -3 6.481 23.694 4
 -2 6 -3 25.976 33.26 5
 2 -6 3 -28.958 30.859 1
 2 -6 3 -23.086 34.846 1
 2 -6 3 -12.103 26.305 4
 2 -6 3 6.457 30.613 5
 -2 6 -4 195.184 43.152 1
 -2 6 -4 147.156 39.864 1
 -2 6 -4 226.363 28.907 4
 -2 6 -4 201.486 39.699 5
 2 -6 4 210.555 44.935 1
 2 -6 4 184.837 41.439 1
 2 -6 4 193.324 31.137 4
 2 -6 4 142.709 39.189 5
 -2 6 -5 200.503 45.793 1
 -2 6 -5 161.039 43.647 1
 -2 6 -5 226.306 30.812 4
 -2 6 -5 219.019 41.733 5
 2 -6 5 222.761 43.487 1
 2 -6 5 310.35 47.423 1
 2 -6 5 168.757 37.645 5
 -2 6 -6 1281.9 83.9 1
 -2 6 -6 1253.8 79.2 1
 -2 6 -6 1346 59.6 4
 -2 6 -6 1475.6 86.5 5
 2 -6 6 1269.3 82.4 1
 2 -6 6 1278.6 84 1
 2 -6 6 1191.4 81.9 5
 -2 6 -7 1072.9 85.1 1
 -2 6 -7 971.802 82 1
 -2 6 -7 1015.2 60.5 4
 -2 6 -7 1023.5 85 5
 2 -6 7 1001.9 78.2 1
 2 -6 7 1103.6 84.1 1
 2 -6 7 1059.1 85.1 5
 -2 6 -8 523.421 54.003 1
 -2 6 -8 496.723 54.485 1
 -2 6 -8 384.439 39.74 4
 -2 6 -8 344.285 51.284 5
 2 -6 8 426.078 50.294 1
 2 -6 8 417.036 52.472 1
 2 -6 8 380.556 49.69 5
 -2 6 -9 4402.9 111.9 1
 -2 6 -9 4243.2 114.8 1
 -2 6 -9 4078.5 92.9 4
 -2 6 -9 4324.8 121.2 5
 2 -6 9 4142.2 110.2 1
 2 -6 9 4256.5 108.9 1
 2 -6 9 4423.2 121 5
 -2 6 -10 4799.7 118.6 1
 -2 6 -10 4961 119.3 1
 -2 6 -10 5084.1 105.6 4
 -2 6 -10 5090.1 133.2 5
 2 -6 10 4698.9 115 1
 2 -6 10 4992.2 118.5 1
 -2 6 -11 237.38 52.05 1
 -2 6 -11 287.853 54.5 1
 -2 6 -11 229.329 47.837 4
 2 -6 11 238.684 54.324 1
 2 -6 11 194.275 60.41 1
 2 -6 11 262.341 51.764 5
 -2 6 -12 543.558 63.936 1
 -2 6 -12 419.513 56.162 4
 -2 6 -12 579.127 68.232 5
 2 -6 12 597.241 63.221 1
 2 -6 12 464.349 60.083 1
 2 -6 12 544.14 62.363 5
 -2 6 -13 1536.5 100.1 1
 -2 6 -13 1632.5 100.8 1
 -2 6 -13 1295.1 103.3 4
 -2 6 -13 1646.4 122.3 5
 2 -6 13 1566.2 99.7 1
 2 -6 13 1581.4 105 1
 2 -6 13 1465.5 113.1 5
 -2 6 -14 28.556 52.921 1
 -2 6 -14 97.877 50.553 1
 -2 6 -14 32.689 51.997 4
 -2 6 -14 11.156 54.924 5
 2 -6 14 33.015 51.536 1
 2 -6 14 25.468 53.014 1
 2 -6 14 -21.042 54.597 3
 2 -6 14 -3.199 51.834 5
 -2 6 -15 914.361 103.377 1
 -2 6 -15 896.482 99.151 1
 -2 6 -15 878.013 103.752 4
 -2 6 -15 743.491 74.194 5
 2 -6 15 803.104 99.845 1
 2 -6 15 942.725 111.069 1
 2 -6 15 840.382 104.578 3
 2 -6 15 749.295 75.452 5
 -2 6 -16 92.278 60.201 1
 -2 6 -16 74.704 58.613 1
 -2 6 -16 144.235 62.067 4
 -2 6 -16 52.814 56.606 5
 2 -6 16 155.679 59.836 1
 2 -6 16 137.487 66.431 1
 2 -6 16 133.403 63.985 3
 2 -6 16 109.488 60.427 5
 -2 6 -17 1452.9 124.6 1
 -2 6 -17 1646.5 130 1
 -2 6 -17 1215.2 120.4 4
 -2 6 -17 1615.2 132.3 5
 2 -6 17 1362.6 118.8 1
 2 -6 17 1445.1 131.7 1
 2 -6 17 1124.6 133.4 5
 -2 6 -18 779.189 83.315 1
 -2 6 -18 796.685 85.942 1
 -2 6 -18 595.241 82.497 4
 2 -6 18 613.028 78.659 1
 2 -6 18 856.588 87.589 1
 2 -6 18 739.162 96.068 3
 2 -6 18 689.82 87.839 5
 -2 6 -19 -32.252 72.383 1
 -2 6 -19 11.88 76.797 1
 -2 6 -19 -37.153 70.26 4
 2 -6 19 -2.573 69.227 1
 2 -6 19 28.659 78.565 1
 2 -6 19 -18.233 92.422 3
 2 -6 19 -39.509 69.596 5
 -2 5 18 -43.907 112.471 1
 2 -5 -18 -30.995 107.212 1
 2 -5 -18 48.674 120.757 1
 -2 5 17 226.475 107.146 1
 2 -5 -17 79.91 92.267 1
 2 -5 -17 115.488 94.437 1
 -2 5 16 244.702 98.844 1
 -2 5 16 408.366 104.924 1
 2 -5 -16 527.054 97.436 1
 2 -5 -16 428.652 98.243 1
 -2 5 15 437.301 95.607 1
 -2 5 15 249.346 93.978 1
 2 -5 -15 430.32 94.296 1
 2 -5 -15 527.024 90.847 1
 -2 5 14 485.687 93.084 1
 -2 5 14 586.322 98.043 1
 2 -5 -14 471.25 90.19 1
 2 -5 -14 456.229 96.112 1
 -2 5 13 34.214 73.156 1
 -2 5 13 153.686 80.919 1
 2 -5 -13 247.601 74.902 1
 2 -5 -13 269.911 77.087 1
 -2 5 12 -142.358 63.971 1
 -2 5 12 -117.083 65.551 1
 2 -5 -12 94.407 72.665 1
 2 -5 -12 84.082 78.208 1
 -2 5 11 564.163 85.825 1
 -2 5 11 713.482 81.603 1
 2 -5 -11 570.449 88.122 1
 2 -5 -11 488.364 84.293 1
 -2 5 10 9423.6 265.4 1
 -2 5 10 10065.5 181.5 1
 2 -5 -10 10377.6 185.7 1
 2 -5 -10 10699.3 188.1 1
 -2 5 9 23947.1 239.3 1
 -2 5 9 23318.9 235.2 1
 2 -5 -9 23997.2 240.4 1
 2 -5 -9 24372.8 239.2 1
 -2 5 8 2068.1 114.8 1
 -2 5 8 2050 114.1 1
 2 -5 -8 2263.1 116.9 1
 2 -5 -8 2215.2 113.6 1
 -2 5 7 19.178 52.192 1
 -2 5 7 -7.597 42.678 1
 -2 5 7 2.204 32.335 5
 2 -5 -7 36.708 50.466 1
 2 -5 -7 62.167 49.317 1
 2 -5 -7 42.012 35.157 4
 -2 5 6 3571.7 111.2 1
 -2 5 6 3342.3 71.3 2
 -2 5 6 3321.8 86.5 5
 2 -5 -6 3416.3 111.5 1
 2 -5 -6 3364.6 85.1 4
 -2 5 5 119.219 40.04 1
 -2 5 5 92.754 43.056 1
 -2 5 5 64.561 33.583 2
 -2 5 5 50.5 32.085 5
 2 -5 -5 62.145 38.596 1
 2 -5 -5 52.415 43.855 1
 2 -5 -5 415.347 40.356 4
 -2 5 4 3049.3 99 1
 -2 5 4 2985.3 96 1
 -2 5 4 2432.6 66.6 2
 -2 5 4 2663.8 80.5 5
 2 -5 -4 2854.9 96.3 1
 2 -5 -4 3034.4 101.3 1
 2 -5 -4 2655.8 39.7 3
 2 -5 -4 2547.6 70.9 4
 -2 5 3 6443.5 116.2 1
 -2 5 3 6095.3 112.3 1
 -2 5 3 5509.6 85.1 2
 -2 5 3 5618.5 100.6 5
 2 -5 -3 6379.7 117.3 1
 2 -5 -3 6280 117.6 1
 2 -5 -3 5668 59.6 3
 2 -5 -3 5778.3 84.3 4
 -2 5 2 715.641 72.207 1
 -2 5 2 775.613 72.45 1
 -2 5 2 533.082 43.83 2
 -2 5 2 503.745 42.908 5
 2 -5 -2 677.312 73.056 1
 2 -5 -2 725.221 70.77 1
 2 -5 -2 624.607 39.65 3
 2 -5 -2 571.534 36.62 4
 -2 5 1 9393 124.5 1
 -2 5 1 9430.2 125.6 1
 -2 5 1 9115.6 103.9 2
 -2 5 1 9098.7 116.9 5
 2 -5 -1 9479.6 125.7 1
 2 -5 -1 9358 123.5 1
 2 -5 -1 7678.7 119.3 3
 2 -5 -1 9000.4 85.7 4
 -2 5 0 269.066 38.716 1
 -2 5 0 196.044 37.112 1
 -2 5 0 217.688 35.406 5
 2 -5 0 230.443 39.803 1
 2 -5 0 286.104 40.205 1
 2 -5 0 271.977 32.967 3
 2 -5 0 166.593 25.06 4
 -2 5 -1 1503.7 69.1 1
 -2 5 -1 1392.5 70.5 1
 -2 5 -1 1407.1 43.2 4
 -2 5 -1 1385.1 68.8 5
 2 -5 1 1495.1 71.7 1
 2 -5 1 1422.3 69.7 1
 2 -5 1 1318.3 51.3 3
 2 -5 1 1324.3 44.8 4
 2 -5 1 1422.8 66.4 5
 -2 5 -2 776.906 62.083 1
 -2 5 -2 738.558 63.825 1
 -2 5 -2 819.219 40.381 4
 -2 5 -2 780.075 63.588 5
 2 -5 2 720.031 61.172 1
 2 -5 2 756.406 63.563 1
 2 -5 2 821.744 50.008 3
 2 -5 2 773.568 41.7 4
 2 -5 2 780.005 63.214 5
 -2 5 -3 4538.2 92.7 1
 -2 5 -3 4523.8 92.2 1
 -2 5 -3 4409.3 61 4
 -2 5 -3 4425.8 95.1 5
 2 -5 3 4201.3 86.6 1
 2 -5 3 4457.9 89.5 1
 2 -5 3 4244.8 80.6 3
 2 -5 3 4307.4 62.1 4
 2 -5 3 4238.6 90.8 5
 -2 5 -4 3873.7 86.8 1
 -2 5 -4 3755.5 84.6 1
 -2 5 -4 3595 59.9 4
 -2 5 -4 3746.8 91.5 5
 2 -5 4 3875.8 87.1 1
 2 -5 4 3769.2 86 1
 2 -5 4 3846.2 91.4 5
 -2 5 -5 7087.2 107.7 1
 -2 5 -5 6697.8 102.2 1
 -2 5 -5 6782.5 79 4
 -2 5 -5 6661.5 112.6 5
 2 -5 5 6870.1 103.8 1
 2 -5 5 6946.4 106.5 1
 2 -5 5 6879.5 112.6 5
 -2 5 -6 562.087 65.347 1
 -2 5 -6 620.336 63.754 1
 -2 5 -6 458.766 46.583 4
 -2 5 -6 475.216 45.571 5
 2 -5 6 529.664 44.695 1
 2 -5 6 427.035 43.841 1
 2 -5 6 476.771 45.772 5
 -2 5 -7 1707.8 77 1
 -2 5 -7 1679.1 75.2 1
 -2 5 -7 1638.1 59.1 4
 -2 5 -7 1706.1 81.7 5
 2 -5 7 1659.3 72.4 1
 2 -5 7 1700.4 75.6 1
 2 -5 7 1609.7 78.7 5
 -2 5 -8 976.184 67.349 1
 -2 5 -8 941.934 68.887 1
 -2 5 -8 987.81 60.69 4
 -2 5 -8 861.854 77.291 5
 2 -5 8 1037.7 65.5 1
 2 -5 8 892.844 66.582 1
 2 -5 8 874.543 74.574 5
 -2 5 -9 21.758 36.457 1
 -2 5 -9 35.98 37.301 1
 -2 5 -9 39.828 32.897 4
 -2 5 -9 -33.462 34.894 5
 2 -5 9 24.456 34.897 1
 2 -5 9 46.119 37.027 1
 2 -5 9 30.724 36.031 5
 -2 5 -10 2840 91.1 1
 -2 5 -10 2554.2 87.3 1
 -2 5 -10 2615.3 84 4
 -2 5 -10 2715.5 102 5
 2 -5 10 2615.9 89.1 1
 2 -5 10 2651.6 88.8 1
 2 -5 10 2906.9 101.6 5
 -2 5 -11 1118.5 80.4 1
 -2 5 -11 1038.4 78.8 4
 -2 5 -11 1348.2 97.4 5
 2 -5 11 1033.3 80.7 1
 2 -5 11 857.502 83.35 1
 2 -5 11 1212.5 85.4 3
 2 -5 11 1269.2 91.3 5
 -2 5 -12 4746.9 111.9 1
 -2 5 -12 4768.2 110.7 1
 -2 5 -12 4696.7 113.8 4
 -2 5 -12 4985.9 132.5 5
 2 -5 12 4561.6 110.8 1
 2 -5 12 4742 111.9 1
 2 -5 12 4515.9 121.1 3
 2 -5 12 4955 128.6 5
 -2 5 -13 4.546 46.282 1
 -2 5 -13 67.172 44.438 1
 -2 5 -13 -9.369 45.844 4
 -2 5 -13 110.315 55.114 5
 2 -5 13 21.379 46.566 1
 2 -5 13 -40.764 55.997 1
 2 -5 13 104.219 52.259 3
 2 -5 13 -5.616 80.377 5
 -2 5 -14 2367.6 104.8 1
 -2 5 -14 2286.1 103 1
 -2 5 -14 2304.4 108.5 4
 -2 5 -14 2258.7 118.8 5
 2 -5 14 2223.7 99.4 1
 2 -5 14 2331.7 106.6 1
 2 -5 14 2183.9 109.5 3
 2 -5 14 2352.6 119.7 5
 -2 5 -15 243.328 55.552 1
 -2 5 -15 231.936 54.025 1
 -2 5 -15 113.175 71.326 4
 -2 5 -15 133.94 56.147 5
 2 -5 15 161.443 49.607 1
 2 -5 15 265.547 58.58 1
 2 -5 15 129.157 59.588 3
 2 -5 15 149.465 54.853 5
 -2 5 -16 797.387 99.032 1
 -2 5 -16 860.939 105.487 1
 -2 5 -16 675.79 71.333 4
 -2 5 -16 630.561 67.057 5
 2 -5 16 837.756 96.486 1
 2 -5 16 657.991 69.429 1
 2 -5 16 525.373 69.466 3
 2 -5 16 695.629 69.733 5
 -2 5 -17 -48.994 55.358 1
 -2 5 -17 -93.426 56.033 1
 -2 5 -17 -8.583 58.515 4
 2 -5 17 -45.794 53.266 1
 2 -5 17 32.933 60.045 1
 2 -5 17 52.677 66.877 3
 2 -5 17 18.812 59.528 5
 -2 5 -18 2445.5 129.6 1
 -2 5 -18 2742.2 129.8 1
 -2 5 -18 2517.6 142.8 4
 2 -5 18 2129.1 121.6 1
 2 -5 18 2812.9 134.4 1
 2 -5 18 2273.7 133.7 3
 2 -5 18 2679.3 146.1 5
 -2 5 -19 8.231 66.899 1
 -2 5 -19 34.957 68.855 1
 -2 5 -19 46.252 72.566 4
 2 -5 19 18.182 61.289 1
 2 -5 19 -3.439 69.167 1
 2 -5 19 63.097 69.548 3
 2 -5 19 -62.326 64.065 5
 -2 5 -20 309.818 79.529 1
 -2 5 -20 392.169 83.541 1
 -2 5 -20 173.311 75.846 4
 2 -5 20 75.509 74.676 1
 2 -5 20 185.824 73.289 1
 2 -5 20 178.871 74.797 5
 -2 4 19 -265.053 98.414 1
 -2 4 19 144.857 108.213 1
 -2 4 19 -79.814 61.998 5
 2 -4 -19 -10.273 99.261 1
 2 -4 -19 -8.141 103.23 1
 2 -4 -19 142.449 70.333 2
 -2 4 18 -288.62 98.943 1
 2 -4 -18 -249.652 88.848 1
 2 -4 -18 124.449 99.851 1
 2 -4 -18 2.902 65.331 2
 -2 4 17 -32.814 82.625 1
 -2 4 17 177.706 89.514 1
 2 -4 -17 40.595 88.705 1
 2 -4 -17 153.906 95.518 1
 2 -4 -17 115.871 60.529 2
 -2 4 16 238.138 86.72 1
 -2 4 16 349.884 94.276 1
 2 -4 -16 369.505 92.175 1
 2 -4 -16 420.091 91.258 1
 2 -4 -16 500.378 62.085 2
 -2 4 15 32.414 68.12 1
 -2 4 15 385.416 159.403 1
 2 -4 -15 291.965 76.152 1
 2 -4 -15 324.575 84.607 1
 2 -4 -15 235.725 55.626 2
 -2 4 14 -17.15 64.928 1
 -2 4 14 154.62 79.446 1
 2 -4 -14 0.628 68.216 1
 2 -4 -14 208.358 118.987 1
 2 -4 -14 101.481 48.578 2
 -2 4 13 1056.7 120.4 1
 -2 4 13 1196.7 128.2 1
 2 -4 -13 1224.3 126.1 1
 2 -4 -13 1392.2 130.1 1
 2 -4 -13 1444.5 82.2 2
 -2 4 12 -74.508 60.376 1
 2 -4 -12 -69.261 66.747 1
 2 -4 -12 -54.092 61.303 1
 2 -4 -12 26.637 39.857 2
 -2 4 11 967.587 115.475 1
 -2 4 11 1274.6 118 1
 2 -4 -11 1050.5 116.5 1
 2 -4 -11 1085.2 112.5 1
 2 -4 -11 1605.4 75.3 2
 -2 4 10 -3.204 50.371 1
 -2 4 10 63.333 56.762 1
 2 -4 -10 13.565 57.504 1
 2 -4 -10 36.965 56.777 1
 2 -4 -10 122.691 39.133 2
 -2 4 9 4562.3 124.3 1
 -2 4 9 4575.1 124.3 1
 2 -4 -9 4521.6 125.6 1
 2 -4 -9 4513.9 126.4 1
 2 -4 -9 4519.7 81 2
 -2 4 8 8134.4 140.7 1
 -2 4 8 7918.2 138.3 1
 2 -4 -8 7741.9 138.7 1
 2 -4 -8 8030.8 139.7 1
 2 -4 -8 7950.6 93.2 2
 -2 4 7 3651.2 109.9 1
 -2 4 7 3668.3 110.7 1
 2 -4 -7 3678 111.3 1
 2 -4 -7 3956.3 113 1
 2 -4 -7 3570.8 74.2 2
 -2 4 6 51258.4 279.7 1
 -2 4 6 50187.3 275.5 1
 2 -4 -6 50228.5 276 1
 2 -4 -6 51258.5 280.1 1
 2 -4 -6 50591.6 199 2
 -2 4 5 160476 464 1
 -2 4 5 151596 504 1
 -2 4 5 147469 434 2
 2 -4 -5 149800 448 1
 2 -4 -5 157575 459 1
 -2 4 4 59245.9 279.9 1
 -2 4 4 57828.1 275.4 1
 -2 4 4 56399.1 210.6 2
 2 -4 -4 56604.9 272.2 1
 2 -4 -4 58417.8 276.9 1
 2 -4 -4 57919.1 134.1 3
 2 -4 -4 55620.7 205.4 4
 -2 4 3 149754 589 1
 -2 4 3 143746 506 1
 -2 4 3 142856 494 2
 -2 4 3 145138 528 5
 2 -4 -3 143239 502 1
 2 -4 -3 145918 458 1
 2 -4 -3 144052 308 3
 2 -4 -3 140788 447 4
 -2 4 2 9840 120.7 1
 -2 4 2 9355.3 117.1 1
 -2 4 2 8980.6 97.2 2
 -2 4 2 8833.5 109.7 5
 2 -4 -2 9360.6 118.3 1
 2 -4 -2 9899.5 121.5 1
 2 -4 -2 9200.9 74.6 3
 2 -4 -2 8993.7 78.9 4
 -2 4 1 67071.8 267.9 1
 -2 4 1 64242.8 262 1
 -2 4 1 64102.3 233.6 2
 -2 4 1 63937.2 258.4 5
 2 -4 -1 65471.5 264.6 1
 2 -4 -1 66177.6 265.4 1
 2 -4 -1 65336.7 198.8 3
 2 -4 -1 64032.1 169 4
 -2 4 0 1603.7 65.6 1
 -2 4 0 1709.3 67.4 1
 -2 4 0 1266.1 60.1 2
 -2 4 0 1343.8 66.1 5
 2 -4 0 1653.2 66.4 1
 2 -4 0 1689 64.7 1
 2 -4 0 1466.1 56.9 3
 2 -4 0 1154.1 37.7 4
 -2 4 -1 3534.1 75.6 1
 -2 4 -1 3455.1 74.3 1
 -2 4 -1 3393.4 42.1 4
 -2 4 -1 3254.4 76.4 5
 2 -4 1 3432.9 75.6 1
 2 -4 1 3341.6 74.8 1
 2 -4 1 3365.7 61.9 3
 2 -4 1 3217.4 43.7 4
 -2 4 -2 3472.4 73.6 1
 -2 4 -2 3487.9 74.4 1
 -2 4 -2 3347.2 43.3 4
 -2 4 -2 3425.2 78.8 5
 2 -4 2 3399.8 71.4 1
 2 -4 2 3435.5 75.4 1
 2 -4 2 3371.6 67.7 3
 2 -4 2 3280.4 44.8 4
 2 -4 2 3405.4 78.3 5
 -2 4 -3 114.34 30.913 1
 -2 4 -3 119.946 28.533 1
 -2 4 -3 141.277 18.868 4
 -2 4 -3 95.508 29.935 5
 2 -4 3 124.674 29.589 1
 2 -4 3 129.015 29.257 1
 2 -4 3 144.103 32.489 3
 2 -4 3 103.43 28.969 5
 -2 4 -4 25.468 29.377 1
 -2 4 -4 15.444 28.621 1
 -2 4 -4 30.289 18.306 4
 -2 4 -4 40.22 27.986 5
 2 -4 4 9.005 29.13 1
 2 -4 4 33.202 29.242 1
 2 -4 4 -2.05 30.818 3
 2 -4 4 13.323 28.383 5
 -2 4 -5 7300.9 95.3 1
 -2 4 -5 7188.6 94 1
 -2 4 -5 7032.9 73.8 4
 -2 4 -5 6975 105.5 5
 2 -4 5 7161.5 92.3 1
 2 -4 5 7161 99.4 1
 2 -4 5 7003.8 105.5 5
 -2 4 -6 344.067 36.215 1
 -2 4 -6 330.959 36.218 1
 -2 4 -6 369.013 42.649 4
 -2 4 -6 265.387 34.667 5
 2 -4 6 326.267 35.506 1
 2 -4 6 365.864 36.444 1
 2 -4 6 321.758 37.817 3
 2 -4 6 336.824 35.786 5
 -2 4 -7 247.558 32.876 1
 -2 4 -7 208.568 33.341 1
 -2 4 -7 195.827 28.352 4
 -2 4 -7 134.906 33.826 5
 2 -4 7 204.939 31.459 1
 2 -4 7 165.383 31.383 1
 2 -4 7 194.599 40.936 3
 2 -4 7 189.025 35.524 5
 -2 4 -8 20.831 30.562 1
 -2 4 -8 -14.456 28.618 1
 -2 4 -8 -9.543 26.38 4
 -2 4 -8 -29.071 30.065 5
 2 -4 8 43.535 30.766 1
 2 -4 8 2.509 28.78 1
 2 -4 8 22.918 35.847 3
 2 -4 8 -15.137 30.525 5
 -2 4 -9 2997.5 77.2 1
 -2 4 -9 3007.2 75.4 1
 -2 4 -9 2945.1 76.1 4
 -2 4 -9 3038.1 91.1 5
 2 -4 9 3009.2 75.3 1
 2 -4 9 2975.7 75.6 1
 2 -4 9 2844.5 86.5 3
 2 -4 9 3015.1 88.5 5
 -2 4 -10 262.653 40.174 1
 -2 4 -10 285.074 38.657 1
 -2 4 -10 300.925 40.847 4
 -2 4 -10 290.734 41.842 5
 2 -4 10 305.531 39.672 1
 2 -4 10 353.079 41.609 1
 2 -4 10 273.042 43.965 3
 2 -4 10 233.308 37.498 5
 -2 4 -11 1371.4 73.8 1
 -2 4 -11 1542.2 71.5 1
 -2 4 -11 1487.7 86.2 5
 2 -4 11 1231.3 70 1
 2 -4 11 1254.9 73 1
 2 -4 11 1393.2 81.3 3
 2 -4 11 1420.7 84.3 5
 -2 4 -12 1169.5 77.7 1
 -2 4 -12 1177.4 76.7 1
 -2 4 -12 1443.1 92.6 5
 2 -4 12 1209.7 76.7 1
 2 -4 12 1350.7 79 1
 2 -4 12 1223.2 83 3
 2 -4 12 1333.8 88.8 5
 -2 4 -13 4237.4 106.6 1
 -2 4 -13 4142.1 103.5 1
 -2 4 -13 4070.2 118 5
 2 -4 13 3755.8 100 1
 2 -4 13 3956.5 104.1 1
 2 -4 13 4338.6 119.2 5
 -2 4 -14 8.448 45.505 1
 -2 4 -14 48.83 46.044 1
 -2 4 -14 -3.953 45.755 5
 2 -4 14 20.571 44.747 1
 2 -4 14 78.464 54.295 1
 2 -4 14 48.653 54.851 3
 2 -4 14 92.566 43.808 5
 -2 4 -15 330.972 58.57 1
 -2 4 -15 295.522 54.351 1
 -2 4 -15 237.275 56.484 5
 2 -4 15 220.831 49.047 1
 2 -4 15 295.809 53.28 1
 2 -4 15 308.549 64.564 3
 -2 4 -16 1048.8 98.4 1
 -2 4 -16 1328 97.2 1
 -2 4 -16 1307.4 103.9 5
 2 -4 16 1022.3 91.7 1
 2 -4 16 1298.4 98.8 1
 2 -4 16 991.345 104.462 3
 2 -4 16 1119.9 107.2 5
 -2 4 -17 10.647 53.407 1
 -2 4 -17 57.979 55.148 1
 2 -4 17 23.973 51.017 1
 2 -4 17 -4.29 53.945 1
 2 -4 17 -9.306 56.687 3
 2 -4 17 66.061 51.685 5
 -2 4 -18 236.11 64.121 1
 -2 4 -18 208.904 63.779 1
 2 -4 18 90.48 55.728 1
 2 -4 18 108.426 60.846 1
 2 -4 18 59.999 63.903 3
 2 -4 18 83.245 56.138 5
 -2 4 -19 65.458 63.128 1
 -2 4 -19 -64.655 65.734 1
 2 -4 19 -33.179 56.984 1
 2 -4 19 31.273 62.825 1
 2 -4 19 23.246 67.034 3
 2 -4 19 -38.595 56.658 5
 -2 4 -20 341.038 74.664 1
 -2 4 -20 384.904 78.171 1
 2 -4 20 136.042 68.64 1
 2 -4 20 186.416 72.097 1
 2 -4 20 109.554 74.827 3
 2 -4 20 275.56 73.271 5
 -2 3 20 -291.504 101.173 1
 -2 3 20 -1.521 110.233 1
 -2 3 20 15.317 69.019 5
 2 -3 -20 -190.731 107.921 1
 2 -3 -20 -68.94 106.845 1
 2 -3 -20 158.084 88.624 2
 -2 3 19 -67.527 86.433 1
 -2 3 19 -139.986 96.185 1
 -2 3 19 -72.365 108.486 5
 2 -3 -19 -136.76 94.482 1
 2 -3 -19 59.961 91.803 1
 2 -3 -19 220.257 79.653 2
 -2 3 18 183.63 85.328 1
 -2 3 18 -4.498 88.998 1
 2 -3 -18 24.433 84.105 1
 2 -3 -18 1.671 89.027 1
 2 -3 -18 148.248 71.408 2
 -2 3 17 311.341 85.122 1
 -2 3 17 -17.618 86.23 1
 2 -3 -17 77.518 81.977 1
 2 -3 -17 38.168 80.596 1
 2 -3 -17 223.297 66.355 2
 -2 3 16 237.302 75.895 1
 -2 3 16 151.188 82.958 1
 2 -3 -16 0.999 75.506 1
 2 -3 -16 137.09 76.643 1
 2 -3 -16 150.234 61.927 2
 -2 3 15 -7.045 66.669 1
 -2 3 15 74.801 72.854 1
 2 -3 -15 -42.168 69.139 1
 2 -3 -15 104.326 67.351 1
 2 -3 -15 3.353 55.266 2
 -2 3 14 430.43 69.188 1
 -2 3 14 507.87 82.173 1
 2 -3 -14 362.489 71.286 1
 2 -3 -14 417.367 71.615 1
 2 -3 -14 767.793 86.11 2
 -2 3 13 474.806 73.282 1
 -2 3 13 578.239 77.076 1
 2 -3 -13 693.651 77.227 1
 2 -3 -13 464.611 67.264 1
 2 -3 -13 711.75 61.263 2
 -2 3 12 459.127 67.328 1
 -2 3 12 475.129 69.389 1
 2 -3 -12 466.893 69.325 1
 2 -3 -12 379.319 60.968 1
 2 -3 -12 620.187 74.097 2
 -2 3 11 -32.242 47.166 1
 -2 3 11 -29.156 52.762 1
 2 -3 -11 -30.788 50.187 1
 2 -3 -11 2.947 52.474 1
 2 -3 -11 -27.764 38.288 2
 -2 3 10 1039.8 91.4 1
 -2 3 10 987.467 90.693 1
 2 -3 -10 932.061 91.687 1
 2 -3 -10 981.956 91.785 1
 2 -3 -10 1177.9 66.9 2
 -2 3 9 758.615 84.283 1
 -2 3 9 665.138 61.795 1
 2 -3 -9 611.173 58.976 1
 2 -3 -9 659.138 81.429 1
 2 -3 -9 912.418 60.506 2
 -2 3 8 16618 171.1 1
 -2 3 8 16509.6 170.1 1
 2 -3 -8 16409.5 172.3 1
 2 -3 -8 16607.4 170.4 1
 2 -3 -8 17330.3 128.3 2
 -2 3 7 4517.3 106.2 1
 -2 3 7 4118.9 102.4 1
 2 -3 -7 4366.3 106.5 1
 2 -3 -7 4627.1 106.5 1
 2 -3 -7 4992.3 78.5 2
 -2 3 6 11946.4 137.7 1
 -2 3 6 11770.2 135.8 1
 2 -3 -6 11426.9 136.1 1
 2 -3 -6 11927 137.6 1
 2 -3 -6 12411.3 105.8 2
 -2 3 5 20332.8 163.9 1
 -2 3 5 20385.4 164.4 1
 -2 3 5 19944.9 129.9 2
 2 -3 -5 20356.2 164.4 1
 2 -3 -5 20541.7 164.7 1
 2 -3 -5 20704.8 129.3 2
 -2 3 4 30980.1 188.3 1
 -2 3 4 29404.2 182.8 1
 -2 3 4 29511.8 151.1 2
 2 -3 -4 29785.1 184.9 1
 2 -3 -4 30772.1 187.5 1
 2 -3 -4 30363.6 153.2 2
 2 -3 -4 30725.7 103.1 3
 -2 3 3 40477.6 204.2 1
 -2 3 3 39764.9 201 1
 -2 3 3 38920.2 171.5 2
 2 -3 -3 38983.2 199.1 1
 2 -3 -3 40700.7 204 1
 2 -3 -3 39987.8 174.1 2
 2 -3 -3 40737.4 127.9 3
 -2 3 2 65961.5 245.3 1
 -2 3 2 64308.2 241 1
 -2 3 2 64275.4 218.9 2
 2 -3 -2 64286.2 241.2 1
 2 -3 -2 66002.7 244.2 1
 2 -3 -2 66786.4 176.5 3
 -2 3 1 93249.2 276.7 1
 -2 3 1 92594.8 402 1
 -2 3 1 91950.4 370.6 2
 -2 3 1 91986.4 356.9 5
 2 -3 -1 91992.2 337.5 1
 2 -3 -1 94013.2 371.8 1
 2 -3 -1 93835.4 275.7 3
 2 -3 -1 92305.9 248.1 4
 -2 3 0 9670.2 93.8 1
 -2 3 0 9449.9 93.9 1
 -2 3 0 9120.4 93.5 2
 -2 3 0 9269.8 99.8 5
 2 -3 0 9587.6 94.7 1
 2 -3 0 9671.6 94.9 1
 2 -3 0 9560.9 81.9 3
 -2 3 -1 1366.5 49.4 1
 -2 3 -1 1409.5 50 1
 -2 3 -1 1264 55.6 5
 2 -3 1 1311.8 51.1 1
 2 -3 1 1380.2 49.8 1
 2 -3 1 1328.2 56.2 3
 -2 3 -2 6285.8 76 1
 -2 3 -2 6142.5 74.7 1
 -2 3 -2 6145.8 86.1 5
 2 -3 2 6151.3 74.4 1
 2 -3 2 6369.8 76 1
 2 -3 2 6257.3 78.5 3
 2 -3 2 6119.7 86.5 5
 -2 3 -3 28157.9 140.5 1
 -2 3 -3 27497.3 138.4 1
 -2 3 -3 27269.5 92.5 4
 -2 3 -3 26757.2 163.2 5
 2 -3 3 27046.7 136.2 1
 2 -3 3 27280.2 137.1 1
 2 -3 3 28140.6 158.4 3
 2 -3 3 27301.7 165.3 5
 -2 3 -4 121344 402 1
 -2 3 -4 117382 438 1
 -2 3 -4 116785 378 4
 -2 3 -4 117831 492 5
 2 -3 4 116667 450 1
 2 -3 4 118301 423 1
 2 -3 4 116514 493 3
 2 -3 4 115697 527 5
 -2 3 -5 62929.6 208.6 1
 -2 3 -5 62488.1 207.1 1
 -2 3 -5 61989.5 255.6 5
 2 -3 5 61434.3 204.4 1
 2 -3 5 62106.9 205.7 1
 2 -3 5 62677 256.2 3
 2 -3 5 60912.5 253.1 5
 -2 3 -6 40171.5 170.7 1
 -2 3 -6 39974.7 170.3 1
 -2 3 -6 40021.5 212.5 5
 2 -3 6 39354.5 167.9 1
 2 -3 6 39055.5 167.6 1
 2 -3 6 39920.2 215.1 3
 2 -3 6 39849.9 211.7 5
 -2 3 -7 44376.8 184.8 1
 -2 3 -7 43695.4 182.6 1
 -2 3 -7 44518.7 229.4 5
 2 -3 7 43524 181.5 1
 2 -3 7 43257.4 180.6 1
 2 -3 7 43702.6 234.2 3
 2 -3 7 43747.6 226.8 5
 -2 3 -8 5057.5 77.2 1
 -2 3 -8 4945.1 94.7 5
 2 -3 8 5081 75.8 1
 2 -3 8 5056.9 77 1
 2 -3 8 5125.7 97.4 3
 2 -3 8 4928.7 92.7 5
 -2 3 -9 10579.4 104.8 1
 -2 3 -9 10788.4 105.1 1
 -2 3 -9 10868.7 128.9 5
 2 -3 9 10581.5 104.4 1
 2 -3 9 10761.2 105 1
 2 -3 9 10544.9 133.3 3
 2 -3 9 10528 126.6 5
 -2 3 -10 2033 67.3 1
 -2 3 -10 2097.5 65.2 1
 -2 3 -10 2155.3 78.6 5
 2 -3 10 2057.2 64.8 1
 2 -3 10 2113.2 66.5 1
 2 -3 10 1943.4 80 3
 2 -3 10 2071.9 78.2 5
 -2 3 -11 553.672 60.753 1
 -2 3 -11 501.66 58.903 1
 -2 3 -11 621.799 69.271 5
 2 -3 11 459.395 41.349 1
 2 -3 11 481.924 42.044 1
 2 -3 11 453.998 54.571 3
 2 -3 11 441.62 43.84 5
 -2 3 -12 22.658 36.737 1
 -2 3 -12 37.681 36.541 1
 -2 3 -12 97.818 39.067 5
 2 -3 12 54.069 36.742 1
 2 -3 12 32.816 37.808 1
 2 -3 12 80.511 47.282 3
 2 -3 12 93.018 36.845 5
 -2 3 -13 312.753 46.387 1
 -2 3 -13 281.869 44.841 1
 -2 3 -13 250.081 45.62 5
 2 -3 13 277.589 45.079 1
 2 -3 13 302.288 46.465 1
 2 -3 13 229.874 51.535 3
 2 -3 13 300.698 45.346 5
 -2 3 -14 -40.05 41.548 1
 -2 3 -14 55.157 42.376 1
 -2 3 -14 77.056 43.504 5
 2 -3 14 2.346 41.018 1
 2 -3 14 -66.295 41.553 1
 2 -3 14 -18.014 48.753 3
 2 -3 14 67.095 41.066 5
 -2 3 -15 185.201 51.353 1
 -2 3 -15 161.547 49.318 1
 -2 3 -15 154.841 48.967 5
 2 -3 15 159.994 47.307 1
 2 -3 15 119.837 77.729 1
 2 -3 15 162.217 58.974 3
 2 -3 15 162.897 46.812 5
 -2 3 -16 -93.716 46.555 1
 -2 3 -16 -82.602 45.744 1
 2 -3 16 32.004 44.411 1
 2 -3 16 7.483 48.407 1
 2 -3 16 -4.93 53.109 3
 2 -3 16 18.659 43.61 5
 -2 3 -17 384.269 59.898 1
 -2 3 -17 431.398 64.548 1
 2 -3 17 359.03 57.966 1
 2 -3 17 382.061 60.599 1
 2 -3 17 398.891 71.018 3
 2 -3 17 292.105 92.185 5
 -2 3 -18 -84.064 52.809 1
 -2 3 -18 -37.721 57.991 1
 2 -3 18 -144.393 48.718 1
 2 -3 18 70.574 57.704 1
 2 -3 18 42.029 64.401 3
 2 -3 18 77.184 53.054 5
 -2 3 -19 -26.492 59.056 1
 -2 3 -19 -70.854 60.908 1
 2 -3 19 -27.233 56.793 1
 2 -3 19 -5.296 60.613 1
 2 -3 19 -1.886 66.224 3
 2 -3 19 -61.276 54.702 5
 -2 3 -20 69.068 65.343 1
 -2 3 -20 -104.547 68.091 1
 2 -3 20 -148.507 60.276 1
 2 -3 20 -6.36 69.698 1
 2 -3 20 24.889 71.744 3
 2 -3 20 47.858 57.914 5
 -2 3 -21 133.867 74.374 1
 -2 3 -21 72.287 76.593 1
 2 -3 21 164.762 73.154 1
 2 -3 21 102.48 82.776 1
 2 -3 21 134.588 80.858 3
 2 -3 21 170.294 64.847 5
 -2 2 20 798.4 111.785 1
 -2 2 20 722.004 112.28 1
 -2 2 20 557.798 66.571 3
 -2 2 20 547.738 79.122 5
 2 -2 -20 616.981 114.876 1
 2 -2 -20 824.192 118.28 1
 2 -2 -20 893.878 125.75 2
 -2 2 19 143.674 84.391 1
 -2 2 19 -91.356 86.729 1
 -2 2 19 45.799 55.254 3
 -2 2 19 -17.762 62.097 5
 2 -2 -19 378.581 100.993 1
 2 -2 -19 -52.205 91.092 1
 2 -2 -19 1.891 86.748 2
 -2 2 18 146.732 79.563 1
 -2 2 18 -23.54 82.483 1
 -2 2 18 -60.19 45.052 3
 2 -2 -18 -174.167 75.561 1
 2 -2 -18 38.58 82.644 1
 2 -2 -18 -89.025 76.608 2
 -2 2 17 98.277 78.74 1
 -2 2 17 -52.305 87.803 1
 -2 2 17 -22.122 41.873 3
 2 -2 -17 -169.834 72.47 1
 2 -2 -17 15.224 79.54 1
 2 -2 -17 60.791 72.504 2
 -2 2 16 197.999 73.625 1
 -2 2 16 214.12 73.053 1
 -2 2 16 207.255 42.557 3
 2 -2 -16 157.772 77.499 1
 2 -2 -16 161.913 76.112 1
 2 -2 -16 281.427 69.162 2
 -2 2 15 -36.072 63.185 1
 -2 2 15 -17.155 63.679 1
 2 -2 -15 6.348 64.288 1
 2 -2 -15 -2.857 67.044 1
 2 -2 -15 -47.19 59.687 2
 -2 2 14 144.566 62.148 1
 -2 2 14 170.579 65.21 1
 2 -2 -14 100.28 74.094 1
 2 -2 -14 126.906 65.126 1
 2 -2 -14 174.893 59.978 2
 -2 2 13 -42.421 54.528 1
 -2 2 13 -110.728 54.699 1
 2 -2 -13 -28.545 53.599 1
 2 -2 -13 -81.925 53.014 1
 2 -2 -13 40.05 52.428 2
 -2 2 12 302.751 61.685 1
 -2 2 12 311.258 60.468 1
 2 -2 -12 317.756 60.014 1
 2 -2 -12 185.08 49.759 1
 2 -2 -12 317.559 52.871 2
 -2 2 11 78.584 46.924 1
 -2 2 11 12.705 51.305 1
 2 -2 -11 51.24 46.875 1
 2 -2 -11 114.922 50.927 1
 2 -2 -11 87.016 43.326 2
 -2 2 10 2643.3 99.1 1
 -2 2 10 2653.7 102.2 1
 2 -2 -10 2630.5 97.8 1
 2 -2 -10 2657.2 98 1
 2 -2 -10 2721.4 79 2
 -2 2 9 477.574 53.29 1
 -2 2 9 422.631 48.072 1
 2 -2 -9 473.323 54.1 1
 2 -2 -9 405.759 47.587 1
 2 -2 -9 579.855 58.563 2
 -2 2 8 1908.8 82.8 1
 -2 2 8 1795.7 81.1 1
 2 -2 -8 1844.2 82.3 1
 2 -2 -8 1912.4 82.6 1
 2 -2 -8 2091.6 66.9 2
 -2 2 7 324.689 45.024 1
 -2 2 7 220.332 41.76 1
 2 -2 -7 208.785 41.131 1
 2 -2 -7 176.097 39.62 1
 2 -2 -7 240.891 34.59 2
 -2 2 6 181.458 33.697 1
 -2 2 6 192.563 35.837 1
 2 -2 -6 240.706 39.885 1
 2 -2 -6 220.045 38.93 1
 2 -2 -6 298.003 35.882 2
 -2 2 5 2592.3 74.2 1
 -2 2 5 2535.6 71.4 1
 2 -2 -5 2649.5 77.7 1
 2 -2 -5 2610.7 74.5 1
 2 -2 -5 2710.6 62.4 2
 -2 2 4 875.361 57.652 1
 -2 2 4 822.76 54.393 1
 -2 2 4 783.638 49.813 2
 2 -2 -4 746.298 58.98 1
 2 -2 -4 779.44 57.737 1
 2 -2 -4 753.181 47.838 2
 2 -2 -4 836.195 34.285 3
 -2 2 3 10534.5 101.2 1
 -2 2 3 10120.7 99.6 1
 -2 2 3 10490.5 93 2
 2 -2 -3 10168.6 100.4 1
 2 -2 -3 10379.6 99.3 1
 2 -2 -3 10613 94.1 2
 2 -2 -3 10926 73 3
 -2 2 2 120507 468 1
 -2 2 2 120268 507 1
 -2 2 2 118447 496 2
 2 -2 -2 115231 437 1
 2 -2 -2 120148 503 1
 2 -2 -2 117961 512 2
 2 -2 -2 122724 397 3
 -2 2 1 978.814 46.088 1
 -2 2 1 920.859 45.984 1
 -2 2 1 897.035 45.993 2
 2 -2 -1 932.441 43.91 1
 2 -2 -1 1040.2 45.9 1
 2 -2 -1 952.298 47.341 2
 2 -2 -1 959.361 36.983 3
 -2 2 0 50714 167.1 1
 -2 2 0 49138.7 163.8 1
 -2 2 0 48660.3 187.4 2
 2 -2 0 49046.4 163.6 1
 2 -2 0 48992.8 163.1 1
 2 -2 0 49845 170.4 3
 -2 2 -1 864.048 36.074 1
 -2 2 -1 862.325 39.039 1
 -2 2 -1 776.003 44.705 2
 -2 2 -1 823.393 46.989 5
 2 -2 1 897.859 37.776 1
 2 -2 1 836.554 37.162 1
 2 -2 1 908.373 40.091 3
 -2 2 -2 30240.5 116.4 1
 -2 2 -2 30068.5 115.5 1
 -2 2 -2 29488.7 153.3 5
 2 -2 2 29795.6 115.2 1
 2 -2 2 29841 114.7 1
 -2 2 -3 3838.2 48.8 1
 -2 2 -3 3736.1 48.1 1
 -2 2 -3 3487.8 65.1 5
 2 -2 3 3462.4 55.5 1
 2 -2 3 3576.8 46.2 1
 2 -2 3 3838.8 65.6 3
 2 -2 3 3476.7 65.1 5
 -2 2 -4 3039.4 45.8 1
 -2 2 -4 2959.1 45.1 1
 -2 2 -4 3010.5 63.9 5
 2 -2 4 2878.1 44.5 1
 2 -2 4 3028.6 64.5 3
 2 -2 4 2851.7 62.7 5
 -2 2 -5 4153 51.8 1
 -2 2 -5 4121.9 52.3 1
 -2 2 -5 4121.8 73.3 5
 2 -2 5 4062.1 51.6 1
 2 -2 5 4227 77.2 3
 2 -2 5 3953 70.7 5
 -2 2 -6 122077 422 1
 -2 2 -6 123653 499 5
 2 -2 6 123311 366 1
 2 -2 6 124377 443 3
 2 -2 6 121704 431 5
 -2 2 -7 124388 407 1
 -2 2 -7 123780 397 1
 -2 2 -7 123231 344 5
 2 -2 7 112355 450 1
 2 -2 7 122924 358 1
 2 -2 7 122736 463 3
 2 -2 7 122337 415 5
 -2 2 -8 7160.7 76.7 1
 -2 2 -8 7124 75.9 1
 -2 2 -8 7283.8 98.3 5
 2 -2 8 7140.1 75.6 1
 2 -2 8 6946.4 74.8 1
 2 -2 8 7138.3 104.3 3
 2 -2 8 6865.6 94.7 5
 -2 2 -9 3505.7 64.8 1
 -2 2 -9 3572 64 1
 -2 2 -9 3463.4 77.9 5
 2 -2 9 3399.5 63 1
 2 -2 9 3444.9 65 1
 2 -2 9 3506.2 84.5 3
 2 -2 9 3511.9 78 5
 -2 2 -10 1330.5 54.6 1
 -2 2 -10 1472.9 55.1 1
 -2 2 -10 1347.6 65.5 5
 2 -2 10 1310.4 53.4 1
 2 -2 10 1459 56.9 1
 2 -2 10 1334.2 68.1 3
 2 -2 10 1470.2 65.3 5
 -2 2 -11 3199.7 71.9 1
 -2 2 -11 3266.7 72.4 1
 -2 2 -11 3249.6 85.2 5
 2 -2 11 3035.9 68.8 1
 2 -2 11 3124.4 71.9 1
 2 -2 11 3297.3 90.5 3
 2 -2 11 3334.1 84 5
 -2 2 -12 2896.1 78.1 1
 -2 2 -12 3100.2 78.6 1
 -2 2 -12 3179.8 89 5
 2 -2 12 2864.9 74.4 1
 2 -2 12 3054.8 79.7 1
 2 -2 12 3039.4 93 3
 2 -2 12 3164.8 88.4 5
 -2 2 -13 1501.4 77.2 1
 -2 2 -13 1398.5 76.6 1
 -2 2 -13 1770 84.4 5
 2 -2 13 1332.4 72.6 1
 2 -2 13 1349.1 77 1
 2 -2 13 1790 89.7 3
 2 -2 13 1591.4 82.2 5
 -2 2 -14 671.715 78.097 1
 -2 2 -14 808.934 58.566 1
 -2 2 -14 867.526 79.694 5
 2 -2 14 681.067 73.065 1
 2 -2 14 869.8 59.976 1
 2 -2 14 898.658 89.767 3
 2 -2 14 951.094 78.705 5
 -2 2 -15 4624.1 109.2 1
 -2 2 -15 4448.3 110.5 1
 2 -2 15 4282.8 104.1 1
 2 -2 15 4335.8 108.3 1
 2 -2 15 4346.7 123.2 3
 2 -2 15 4638.2 113.7 5
 -2 2 -16 18.222 50.694 1
 2 -2 16 -73.313 44.201 1
 2 -2 16 -28.612 50.808 1
 2 -2 16 0.948 55.809 3
 2 -2 16 -13.646 42.35 5
 -2 2 -17 146.85 53.415 1
 -2 2 -17 101.141 58.26 1
 2 -2 17 175.622 52.906 1
 2 -2 17 197.05 57.3 1
 2 -2 17 178.853 65.484 3
 2 -2 17 194.429 49.393 5
 -2 2 -18 2467.6 113 1
 -2 2 -18 2548.8 120.2 1
 2 -2 18 2183.8 105.7 1
 2 -2 18 2335.1 116.4 1
 2 -2 18 2228.5 121.7 3
 2 -2 18 2139.5 110.7 5
 -2 2 -19 180.27 57.501 1
 -2 2 -19 266.999 68.5 1
 2 -2 19 175.989 59.55 1
 2 -2 19 136.333 64.198 1
 2 -2 19 248.168 75.472 3
 2 -2 19 194.217 88.085 5
 -2 2 -20 702.879 78.541 1
 -2 2 -20 602.175 80.861 1
 2 -2 20 500.575 73.797 1
 2 -2 20 560.973 74.778 1
 2 -2 20 565.853 87.931 3
 2 -2 20 924.059 110.398 5
 -2 2 -21 117.473 71.042 1
 -2 2 -21 113.056 78.08 1
 2 -2 21 5.452 70.854 1
 2 -2 21 -60.825 72.717 3
 2 -2 21 163.826 64.656 5
 -2 1 21 45.872 106.258 1
 -2 1 21 -20.74 110.139 1
 -2 1 21 38.284 69.542 3
 -2 1 21 104.025 72.51 5
 2 -1 -21 -94.789 107.922 1
 2 -1 -21 363.795 114.018 1
 -2 1 20 301.349 100.979 1
 -2 1 20 191.56 98.797 1
 -2 1 20 -8.778 60.405 3
 -2 1 20 -126.082 64.684 5
 2 -1 -20 -47.81 92.496 1
 2 -1 -20 287.547 103.155 1
 -2 1 19 1747.4 157.2 1
 -2 1 19 1623.7 161.3 1
 -2 1 19 818.668 79.638 5
 2 -1 -19 904.207 107.875 1
 2 -1 -19 1751.4 170.8 1
 -2 1 18 612.19 90.716 1
 -2 1 18 844.284 110.948 1
 -2 1 18 399.733 69.371 5
 2 -1 -18 704.783 100.156 1
 2 -1 -18 698.838 98.438 1
 -2 1 17 2109.2 150.4 1
 -2 1 17 2078.6 147.1 1
 2 -1 -17 2364.3 152 1
 2 -1 -17 2370.8 223.5 1
 -2 1 16 2619.2 141.4 1
 -2 1 16 2422.3 131.9 1
 2 -1 -16 2715.7 139.7 1
 2 -1 -16 2425.3 142.3 1
 -2 1 15 1359.4 120.5 1
 -2 1 15 1365.4 118.7 1
 2 -1 -15 1463 126.8 1
 2 -1 -15 1522.9 126.6 1
 -2 1 14 1535.5 130.3 1
 -2 1 14 1563.2 112.5 1
 2 -1 -14 1346.2 110.5 1
 2 -1 -14 1636.3 118.4 1
 -2 1 13 176.099 55.323 1
 -2 1 13 213.111 60.291 1
 2 -1 -13 173.813 56.959 1
 2 -1 -13 237.702 58.552 1
 -2 1 12 6772.1 137.9 1
 -2 1 12 6532.1 133.1 1
 2 -1 -12 6514.8 132.9 1
 2 -1 -12 6442.8 132.4 1
 -2 1 11 137.195 43.949 1
 -2 1 11 148.523 44.637 1
 2 -1 -11 203.139 49.009 1
 2 -1 -11 192.373 50.281 1
 -2 1 10 3886.8 103.4 1
 -2 1 10 3815 99.7 1
 2 -1 -10 3736.2 101.1 1
 2 -1 -10 3986.4 103.6 1
 -2 1 9 5052.1 105.5 1
 -2 1 9 5031.9 104.2 1
 2 -1 -9 5077.5 104.3 1
 2 -1 -9 5116.5 105.9 1
 -2 1 8 2644.5 84.3 1
 -2 1 8 2787.7 83.6 1
 2 -1 -8 2826.8 86.2 1
 2 -1 -8 2709.7 84.1 1
 2 -1 -8 3027 75.9 2
 -2 1 7 24104.1 171.3 1
 -2 1 7 23545.5 168.9 1
 2 -1 -7 23246.5 168.3 1
 2 -1 -7 23891.5 169.7 1
 2 -1 -7 24106.8 155.3 2
 -2 1 6 1517.4 67 1
 -2 1 6 1501.6 67.5 1
 2 -1 -6 1515.3 68.1 1
 2 -1 -6 1576.6 65.6 1
 2 -1 -6 1549 59.6 2
 -2 1 5 3471.7 73.8 1
 -2 1 5 3431.8 75 1
 2 -1 -5 3502.4 75.2 1
 2 -1 -5 3532.4 72.1 1
 2 -1 -5 3626.5 67.9 2
 -2 1 4 75438.1 307.2 1
 -2 1 4 73006.8 237.7 1
 2 -1 -4 72533.6 237.3 1
 2 -1 -4 72294.3 235.9 1
 2 -1 -4 71932 264.3 2
 -2 1 3 1535.6 51.4 1
 -2 1 3 1536.3 51.2 1
 -2 1 3 1615.4 51.4 2
 2 -1 -3 1444.8 50.7 1
 2 -1 -3 1616 52.1 1
 2 -1 -3 1585.5 50.8 2
 2 -1 -3 1718 43.4 3
 2 -1 -3 1584.3 39.7 4
 -2 1 2 6454 70.1 1
 -2 1 2 6174.2 67.4 1
 -2 1 2 6299.3 74.4 2
 2 -1 -2 6136.9 68.7 1
 2 -1 -2 6337.7 69.7 1
 2 -1 -2 6282.1 74.6 2
 2 -1 -2 6518.2 65.2 3
 2 -1 -2 5905.9 51.1 4
 -2 1 1 17692.3 95.3 1
 -2 1 1 17040.8 93 1
 -2 1 1 16994.1 111.2 2
 -2 1 1 17014.8 69 4
 2 -1 -1 17060.7 93.3 1
 2 -1 -1 17123.4 92.6 1
 2 -1 -1 17127.3 111.2 2
 2 -1 -1 17958.8 103.2 3
 2 -1 -1 16445.5 68.4 4
 -2 1 0 12963.6 73.7 1
 -2 1 0 12409.5 71.4 1
 -2 1 0 12361.2 96.4 2
 -2 1 0 12184.5 55.5 4
 2 -1 0 12776.1 73.5 1
 2 -1 0 12841.4 72.6 1
 2 -1 0 12630 96.7 2
 2 -1 0 12863.7 91.2 3
 2 -1 0 12273.7 56.3 4
 -2 1 -1 50743.3 184.6 1
 -2 1 -1 49692.4 161 1
 -2 1 -1 49588.8 183.5 2
 -2 1 -1 49860.4 159.8 4
 2 -1 1 50844.4 172.8 1
 2 -1 1 49327.1 183.5 2
 2 -1 1 51299.9 181.2 3
 -2 1 -2 19139.8 67.4 1
 -2 1 -2 19575.1 63.8 1
 -2 1 -2 19509.4 120.4 2
 -2 1 -2 19706.8 82.9 4
 -2 1 -2 19090.1 113.8 5
 2 -1 2 14475.5 53.5 1
 2 -1 2 19681.3 62.4 1
 2 -1 2 18489.2 140.8 3
 -2 1 -3 53634.4 198.9 2
 -2 1 -3 54254.6 186.7 5
 2 -1 3 54485.6 203.8 3
 -2 1 -4 34105.3 151.7 5
 2 -1 4 35134.3 171.5 3
 -2 1 -5 18572.6 67.1 1
 -2 1 -5 19355.3 68.9 1
 -2 1 -5 18948.5 118.4 5
 2 -1 5 18832.2 65.5 1
 2 -1 5 18615.3 64.9 1
 2 -1 5 19070.5 135.2 3
 2 -1 5 18511.3 117.6 5
 -2 1 -6 10503 62.4 1
 -2 1 -6 10461.5 65.4 1
 -2 1 -6 10443.3 94.8 5
 2 -1 6 7958.3 52.9 1
 2 -1 6 10525.4 61.2 1
 2 -1 6 10692.5 110.1 3
 2 -1 6 10279.2 93.9 5
 -2 1 -7 20768.2 95.8 1
 -2 1 -7 20968.7 132.6 5
 2 -1 7 21177.9 95.3 1
 2 -1 7 20813.1 153.9 3
 2 -1 7 20498.3 131.3 5
 -2 1 -8 926.127 40.319 1
 -2 1 -8 983.841 40.707 1
 -2 1 -8 988.232 51.166 5
 2 -1 8 1008.8 41.7 1
 2 -1 8 993.465 58.771 3
 2 -1 8 906.01 50.404 5
 -2 1 -9 3430.9 58.6 1
 -2 1 -9 3437.6 59.1 1
 -2 1 -9 3512.2 70.5 5
 2 -1 9 3453.5 59.4 1
 2 -1 9 3416.3 81.9 3
 2 -1 9 3391.5 69.7 5
 -2 1 -10 3408.1 64.8 1
 -2 1 -10 3587.4 65.6 1
 -2 1 -10 3464.4 74.1 5
 2 -1 10 3444.9 62.9 1
 2 -1 10 3472.6 65.7 1
 2 -1 10 3445.2 85.9 3
 2 -1 10 3362.6 71.8 5
 -2 1 -11 1666.4 58.7 1
 -2 1 -11 1658.6 61 1
 -2 1 -11 1504 65.4 5
 2 -1 11 1663.8 57 1
 2 -1 11 1845.8 63.3 1
 2 -1 11 1720.8 76.2 3
 2 -1 11 1595.5 63.6 5
 -2 1 -12 6632.9 93.1 1
 -2 1 -12 6879.4 96 1
 -2 1 -12 6725.9 102.3 5
 2 -1 12 6473.4 90.3 1
 2 -1 12 6818.8 96.7 1
 2 -1 12 6440.6 118.1 3
 2 -1 12 6494.2 99.7 5
 -2 1 -13 19557.4 153.4 1
 -2 1 -13 20169.3 158.3 1
 -2 1 -13 19323.1 160.5 5
 2 -1 13 18708.3 147.9 1
 2 -1 13 19735.9 155.2 1
 2 -1 13 18700.7 188.7 3
 2 -1 13 19022.8 159.5 5
 -2 1 -14 16754.8 153.9 1
 -2 1 -14 17260.6 158.5 1
 2 -1 14 16216.9 147.1 1
 2 -1 14 17083.6 155.3 1
 2 -1 14 15968.7 182.8 3
 2 -1 14 16422 156.5 5
 -2 1 -15 686.68 83.299 1
 -2 1 -15 792.735 62.171 1
 2 -1 15 967.4 77.249 1
 2 -1 15 776.446 61.829 1
 2 -1 15 834.547 89.495 3
 2 -1 15 1021 77.7 5
 -2 1 -16 3037.8 153.1 1
 -2 1 -16 3253.4 112.8 1
 2 -1 16 3214.8 97.6 1
 2 -1 16 3226.2 106.5 1
 2 -1 16 3307.7 118.1 3
 2 -1 16 3451.8 100.3 5
 -2 1 -17 2857.5 109.9 1
 -2 1 -17 3388.6 117.4 1
 2 -1 17 2964.7 105.7 1
 2 -1 17 2976.3 110.2 1
 2 -1 17 3002.2 118.2 3
 2 -1 17 3109.2 102.8 5
 -2 1 -18 30.899 53.472 1
 -2 1 -18 -111.53 53.451 1
 2 -1 18 -4.039 51.732 1
 2 -1 18 95.876 55.54 1
 2 -1 18 10.499 60.426 3
 2 -1 18 83.645 43.617 5
 -2 1 -19 146.578 58.388 1
 -2 1 -19 37.751 62.5 1
 2 -1 19 46.421 56.796 1
 2 -1 19 53.634 60.042 1
 2 -1 19 9.952 64.881 3
 2 -1 19 141.346 48.676 5
 -2 1 -20 108.582 66.6 1
 -2 1 -20 231.246 70.466 1
 2 -1 20 -9.323 63.647 1
 2 -1 20 211.7 71.982 1
 2 -1 20 181.643 74.944 3
 2 -1 20 114.59 52.428 5
 -2 1 -21 307.72 73.222 1
 -2 1 -21 251.548 77.118 1
 2 -1 21 145.666 74.819 1
 2 -1 21 279.976 71.378 1
 2 -1 21 225.195 74.6 3
 -2 0 21 362.002 109.422 1
 -2 0 21 375.975 109.858 1
 -2 0 21 403.448 82.244 5
 2 0 -21 426.919 111.028 1
 2 0 -21 629.136 118.784 1
 -2 0 20 2435 174.2 1
 -2 0 20 2815.7 186.7 1
 -2 0 20 2954.6 153.5 5
 2 0 -20 3112.9 178.1 1
 2 0 -20 3369.1 197.6 1
 -2 0 19 1822.3 160.5 1
 -2 0 19 968.293 114.51 1
 -2 0 19 532.747 76.304 5
 2 0 -19 1391.2 164 1
 2 0 -19 1641.2 170.8 1
 -2 0 18 11834.7 219.5 1
 -2 0 18 10489.7 333.3 1
 -2 0 18 10994.7 190.5 5
 2 0 -18 11985.1 221.1 1
 2 0 -18 12382.5 228.4 1
 -2 0 17 10469.2 207 1
 -2 0 17 10948.4 206.9 1
 -2 0 17 8057.6 211.3 5
 2 0 -17 10319.9 204 1
 2 0 -17 10074 312.6 1
 -2 0 16 75.99 69.392 1
 -2 0 16 150.626 66.649 1
 2 0 -16 70.339 65.312 1
 2 0 -16 189.701 72.075 1
 -2 0 15 366.754 71.744 1
 -2 0 15 393.013 70.438 1
 2 0 -15 294.996 85.149 1
 2 0 -15 261.288 68.075 1
 -2 0 14 2817.7 128 1
 -2 0 14 2837.5 121.9 1
 2 0 -14 2749.7 122.8 1
 2 0 -14 2674.5 122.1 1
 -2 0 13 858.475 99.02 1
 -2 0 13 941.38 98.088 1
 2 0 -13 816.007 70.75 1
 2 0 -13 678.97 64.84 1
 -2 0 12 -49.769 46.17 1
 -2 0 12 -17.777 44.013 1
 2 0 -12 -33.498 44.562 1
 2 0 -12 -28.291 45.668 1
 -2 0 11 6478.3 124.4 1
 -2 0 11 6435.4 122.2 1
 2 0 -11 6444.9 122.6 1
 2 0 -11 6342.6 121.1 1
 -2 0 10 1562.7 84.9 1
 -2 0 10 1565.6 81.9 1
 2 0 -10 1445.4 81.6 1
 2 0 -10 1587.4 82.9 1
 -2 0 9 8505.1 123.4 1
 -2 0 9 8193.3 119 1
 2 0 -9 8377.6 120.5 1
 -2 0 8 548.196 68.148 1
 -2 0 8 467.7 44.803 1
 2 0 -8 483.121 46.762 1
 2 0 -8 494.371 47.205 1
 -2 0 7 29029.7 181.9 1
 -2 0 7 28435 179.8 1
 2 0 -7 28378.5 179.6 1
 2 0 -7 28930.6 180.7 1
 2 0 -7 27254.6 166.8 4
 -2 0 6 2532.8 71.7 1
 -2 0 6 2483.7 69.7 1
 2 0 -6 2500.2 70.3 1
 2 0 -6 2339.8 62.8 4
 -2 0 5 652.355 53.239 1
 -2 0 5 662.284 51.661 1
 2 0 -5 632.072 51.491 1
 2 0 -5 574.297 50.141 1
 2 0 -5 840.967 51.752 2
 2 0 -5 690.822 46.494 4
 -2 0 4 194.587 27.152 1
 -2 0 4 192.069 28.282 1
 2 0 -4 188.522 27.827 1
 2 0 -4 201.283 29.246 1
 2 0 -4 238.669 31.637 2
 2 0 -4 191.248 23.715 4
 -2 0 3 6511.2 73.6 1
 -2 0 3 6211.3 71.4 1
 -2 0 3 6150.1 66.7 4
 2 0 -3 6124.5 71.1 1
 2 0 -3 6251 72.6 1
 2 0 -3 6103.9 76.2 2
 2 0 -3 5930.8 65.7 4
 -2 0 2 4753.7 60.3 1
 -2 0 2 4583.2 58.5 1
 -2 0 2 4684.8 68.9 2
 -2 0 2 4644.6 56.2 4
 2 0 -2 4526.3 58.5 1
 2 0 -2 4824.7 60.3 1
 2 0 -2 4544.4 66.2 2
 2 0 -2 4945.2 65.8 3
 2 0 -2 4425 55.5 4
 -2 0 1 6980.1 61.3 1
 -2 0 1 6836.2 59.9 1
 -2 0 1 6888 76.2 2
 -2 0 1 6941 61.5 4
 2 0 -1 6838.9 59.6 1
 2 0 -1 7006.5 61.3 1
 2 0 -1 6908 75.2 2
 2 0 -1 7017.7 74.5 3
 2 0 -1 6662 61.9 4
 -2 0 0 3502.3 41.7 1
 -2 0 0 3204.1 39.2 1
 -2 0 0 3194.5 46.3 4
 2 0 0 3417.8 41.3 1
 2 0 0 3243 57.6 2
 2 0 0 3458.7 57.4 3
 2 0 0 3257.8 48 4
 -2 0 -1 7646.6 76.8 2
 -2 0 -1 7640 66 4
 2 0 1 2251.7 26.9 1
 2 0 1 7638.4 42.8 1
 2 0 1 7520.6 76 2
 2 0 1 7887.7 80.3 3
 2 0 1 7431.7 65 4
 -2 0 -2 16798.8 107.7 2
 -2 0 -2 17024.5 97.7 4
 2 0 2 17123.5 109.1 2
 -2 0 -3 929.183 40.497 2
 -2 0 -3 918.577 38.84 4
 -2 0 -3 937.069 35.698 5
 2 0 3 900.955 45.206 3
 -2 0 -4 12930.4 99.1 2
 -2 0 -4 12726.7 98 4
 -2 0 -4 12763.6 84.3 5
 2 0 4 13216.8 109 3
 -2 0 -5 7041.7 80.2 2
 -2 0 -5 6783.8 65.8 5
 2 0 5 7049.1 87.4 3
 -2 0 -6 838.717 29.455 1
 -2 0 -6 891.641 29.218 1
 -2 0 -6 836.738 37.786 5
 2 0 6 772.716 28.813 1
 2 0 6 822.612 27.755 1
 2 0 6 859.24 51.069 3
 -2 0 -7 37573 124 1
 -2 0 -7 36806.2 149.9 5
 2 0 7 37088.7 120.4 1
 2 0 7 6216.6 55.3 1
 2 0 7 36615.5 195.4 3
 2 0 7 35962.5 148.5 5
 -2 0 -8 3364.2 53.1 1
 -2 0 -8 3328.8 55.9 1
 -2 0 -8 3253.6 57 5
 2 0 8 3386.6 52.1 1
 2 0 8 3313 74.8 3
 2 0 8 3039.2 55.9 5
 -2 0 -9 424.062 41.461 1
 -2 0 -9 467.491 43.504 1
 -2 0 -9 440.216 41.931 5
 2 0 9 420.502 40.823 1
 2 0 9 427.033 51.616 3
 2 0 9 407.07 40.454 5
 -2 0 -10 38.123 25.763 1
 -2 0 -10 18.197 25.464 1
 -2 0 -10 6.002 22.093 5
 2 0 10 76.569 25.542 1
 2 0 10 48.076 25.565 1
 2 0 10 11.285 33.989 3
 2 0 10 -4.808 21.71 5
 -2 0 -11 911.146 55.149 1
 -2 0 -11 909.658 56.645 1
 -2 0 -11 954.257 51.896 5
 2 0 11 978.088 55.5 1
 2 0 11 986.416 54.543 1
 2 0 11 985.578 66.066 3
 2 0 11 917.467 50.366 5
 -2 0 -12 1634.3 66.7 1
 -2 0 -12 1708.9 69.3 1
 2 0 12 1705.7 67 1
 2 0 12 1447.5 65 1
 2 0 12 1556.5 76.8 3
 2 0 12 1600.4 59.7 5
 -2 0 -13 4465.4 92.3 1
 -2 0 -13 4750.3 94.9 1
 2 0 13 4389.2 90.4 1
 2 0 13 4390.4 90.6 1
 2 0 13 4175.4 104.5 3
 2 0 13 3991.2 80.6 5
 -2 0 -14 1661.2 85.7 1
 -2 0 -14 1555.2 86.3 1
 2 0 14 1613.1 82.8 1
 2 0 14 1404 80.6 1
 2 0 14 1313.3 90.1 3
 2 0 14 1195.2 68 5
 -2 0 -15 4093.1 110 1
 -2 0 -15 4160.1 109.1 1
 2 0 15 3993.9 106.7 1
 2 0 15 3819 104.8 1
 2 0 15 3406.8 113 3
 2 0 15 3688.5 88.6 5
 -2 0 -16 937.013 83.443 1
 -2 0 -16 891.035 93.912 1
 2 0 16 808.179 90.668 1
 2 0 16 934.237 90.602 1
 2 0 16 844.431 91.719 3
 2 0 16 1073.1 73.2 5
 -2 0 -17 -20.192 50.288 1
 -2 0 -17 -3.953 49.459 1
 2 0 17 48.428 51.609 1
 2 0 17 -9.426 53.405 1
 2 0 17 -10.724 56.158 3
 2 0 17 -11.63 36.525 5
 -2 0 -18 1010.5 101.9 1
 -2 0 -18 1138.5 106.3 1
 2 0 18 1253.2 103.3 1
 2 0 18 993.957 78.176 1
 2 0 18 959.606 101.425 3
 2 0 18 1180.3 82.6 5
 -2 0 -19 1021.7 115.7 1
 -2 0 -19 1169.2 117.3 1
 2 0 19 1253.6 109.3 1
 2 0 19 890.409 106.355 3
 2 0 19 939.688 87.303 5
 -2 0 -20 194.759 69.215 1
 -2 0 -20 167.628 66.813 1
 2 0 20 43.676 62.027 1
 2 0 20 151.179 74.842 3
 2 0 20 124.652 46.84 5
 -2 -1 21 736.977 115.655 1
 -2 -1 21 530.261 118.771 1
 -2 -1 21 360.49 84.162 5
 2 1 -21 355.028 107.345 1
 2 1 -21 917.336 136.713 1
 2 1 -21 491.499 94.048 4
 -2 -1 20 462.615 106.618 1
 -2 -1 20 251.828 102.502 1
 -2 -1 20 401.594 79.169 5
 2 1 -20 139.552 91.949 1
 2 1 -20 281.903 109.68 1
 2 1 -20 318.477 80.789 4
 -2 -1 19 107.155 92.536 1
 -2 -1 19 204.288 90.577 1
 -2 -1 19 222.41 68.708 5
 2 1 -19 7.322 78.421 1
 2 1 -19 154.217 92.983 1
 2 1 -19 126.859 72.63 4
 -2 -1 18 277.717 88.741 1
 -2 -1 18 375.472 120.26 1
 -2 -1 18 441.2 70.678 5
 2 1 -18 339.782 86.958 1
 2 1 -18 237.221 92.713 1
 2 1 -18 448.686 77.889 4
 -2 -1 17 -112.989 71.517 1
 -2 -1 17 -16.274 72.198 1
 -2 -1 17 52.648 58.399 5
 2 1 -17 -55.875 71.261 1
 2 1 -17 111.632 64.547 4
 -2 -1 16 11529.1 194.9 1
 -2 -1 16 12218.2 203.3 1
 2 1 -16 11843.2 196.9 1
 2 1 -16 11935.9 200.5 1
 2 1 -16 11055.8 189.3 4
 -2 -1 15 1151.3 116.4 1
 -2 -1 15 807.78 80.441 1
 -2 -1 15 601.943 67.326 5
 2 1 -15 930.812 102.146 1
 2 1 -15 1140 120.9 1
 2 1 -15 961.249 108.467 4
 -2 -1 14 5736.4 144.9 1
 -2 -1 14 5868.3 143.8 1
 2 1 -14 5777.3 143.6 1
 2 1 -14 5760 143.3 1
 2 1 -14 5659.6 140.3 4
 -2 -1 13 -16.531 44.501 1
 -2 -1 13 -115.686 49.343 1
 2 1 -13 -55.402 48.585 1
 2 1 -13 -17.257 49.525 1
 2 1 -13 0.797 45.537 4
 -2 -1 12 18.637 45.089 1
 -2 -1 12 -42.071 44.597 1
 2 1 -12 55.328 47.551 1
 2 1 -12 5.127 47.239 1
 2 1 -12 -0.09252 41.001 4
 -2 -1 11 5063.8 115.7 1
 -2 -1 11 4864.4 114.4 1
 2 1 -11 5094.9 115.1 1
 2 1 -11 4876.2 108.5 4
 -2 -1 10 1133.4 82.4 1
 2 1 -10 1167 82.2 1
 2 1 -10 1171.9 77.8 4
 -2 -1 9 162864 462 1
 -2 -1 9 157547 454 1
 2 1 -9 156862 453 1
 2 1 -9 157483 453 1
 2 1 -9 151341 435 4
 -2 -1 8 33416.4 206.2 1
 -2 -1 8 32379.1 203.6 1
 2 1 -8 32601.4 204.3 1
 2 1 -8 32957.6 205 1
 2 1 -8 31132.8 195.4 4
 -2 -1 7 6543.6 101.2 1
 -2 -1 7 6572.9 101.1 1
 2 1 -7 6476.9 101.2 1
 2 1 -7 6628.8 99.1 1
 2 1 -7 6328.9 96.3 4
 -2 -1 6 29745.5 175.7 1
 -2 -1 6 29212.5 174.2 1
 2 1 -6 28923.1 173.1 1
 2 1 -6 29038.9 172.8 1
 2 1 -6 27948.3 167 4
 -2 -1 5 9705.5 102.2 1
 -2 -1 5 9431 101 1
 -2 -1 5 9126.6 97.7 4
 2 1 -5 9402.8 100.8 1
 2 1 -5 9580.4 101.1 1
 2 1 -5 8988.6 98.1 4
 -2 -1 4 6537 81.9 1
 -2 -1 4 6342.1 81.9 1
 -2 -1 4 6397.3 81.8 4
 2 1 -4 6379.8 81.7 1
 2 1 -4 6474.5 81.4 1
 2 1 -4 6171.1 80.4 4
 -2 -1 3 45642.6 177.2 1
 -2 -1 3 43764.5 178.8 4
 2 1 -3 44239.3 174.3 1
 2 1 -3 44503.3 174.6 1
 2 1 -3 45328.1 191 2
 2 1 -3 42685.8 176.7 4
 -2 -1 2 28136.5 131.3 1
 -2 -1 2 28694.9 132 1
 -2 -1 2 28257.6 141 4
 2 1 -2 27926.5 130.5 1
 2 1 -2 28273.6 130.7 1
 2 1 -2 28931.3 149.5 2
 2 1 -2 28066.1 140.8 4
 -2 -1 1 380.099 35.077 1
 -2 -1 1 476.6 34.601 1
 -2 -1 1 445.384 40.149 4
 2 1 -1 440.418 35.681 1
 2 1 -1 516.636 35.533 1
 2 1 -1 355.03 40.323 2
 2 1 -1 537.743 45.218 3
 2 1 -1 383.482 40.385 4
 -2 -1 0 2937.5 45.9 1
 -2 -1 0 2902.8 45.3 1
 -2 -1 0 3099.9 58.7 2
 -2 -1 0 2820.6 56.2 4
 2 1 0 2907.8 45.9 1
 2 1 0 2951 45 1
 2 1 0 2762 55.9 2
 2 1 0 2985.5 61.1 3
 2 1 0 2885.5 57.3 4
 -2 -1 -1 23530.6 93.6 1
 -2 -1 -1 24152.9 95.1 1
 -2 -1 -1 24189 125.5 2
 -2 -1 -1 24229.9 132.1 4
 2 1 1 23495.4 92.9 1
 2 1 1 24447.8 126.5 2
 2 1 1 24023.2 143.3 3
 2 1 1 23284.2 129 4
 -2 -1 -2 891.61 28.749 1
 -2 -1 -2 762.21 35.968 1
 -2 -1 -2 937.897 40.3 2
 -2 -1 -2 894.281 46.07 4
 2 1 2 865.715 29.024 1
 2 1 2 855.193 40.371 2
 2 1 2 899.573 46.462 3
 2 1 2 872.005 44.356 4
 -2 -1 -3 714.647 27.779 1
 -2 -1 -3 763.442 39.036 2
 -2 -1 -3 695.54 47.387 4
 2 1 3 704.782 28.912 1
 2 1 3 742.721 40.959 2
 2 1 3 722.961 46.421 3
 -2 -1 -4 43734.7 119.8 1
 -2 -1 -4 44408.8 167.6 2
 -2 -1 -4 43546.2 197.4 4
 -2 -1 -4 43041.8 128.5 5
 2 1 4 42940.8 116.6 1
 2 1 4 44579.2 195.6 3
 -2 -1 -5 10688.2 68.9 1
 -2 -1 -5 10721.5 89.8 2
 -2 -1 -5 10592.9 110.3 4
 -2 -1 -5 10160.6 65.6 5
 2 1 5 10626.7 67.4 1
 2 1 5 10662.8 105.3 3
 -2 -1 -6 12.262 19.141 1
 -2 -1 -6 10.654 24.948 1
 -2 -1 -6 1.236 25.078 2
 -2 -1 -6 37.894 29.589 4
 -2 -1 -6 5.006 14.585 5
 2 1 6 44.431 20.342 1
 2 1 6 9.578 29.576 3
 -2 -1 -7 140.832 23.901 1
 -2 -1 -7 189.942 23.592 1
 -2 -1 -7 179.771 29.596 2
 -2 -1 -7 120.011 16.479 5
 2 1 7 161.23 22.888 1
 2 1 7 154.022 34.77 3
 -2 -1 -8 637.565 44.783 1
 -2 -1 -8 670.22 45.249 1
 -2 -1 -8 670.295 47.313 2
 -2 -1 -8 577.182 31.687 5
 2 1 8 665.091 42.723 1
 2 1 8 606.926 54.291 3
 -2 -1 -9 298.756 31.8 1
 -2 -1 -9 332.6 31.445 1
 -2 -1 -9 376.17 32.231 5
 2 1 9 328.856 31.151 1
 2 1 9 288.288 31.12 1
 2 1 9 276.026 39.589 3
 -2 -1 -10 266.595 34.426 1
 -2 -1 -10 320.623 34.63 1
 2 1 10 330.16 33.057 1
 2 1 10 322.535 34.864 1
 2 1 10 367.635 46.063 3
 2 1 10 371.839 34.96 5
 -2 -1 -11 452.542 41.358 1
 -2 -1 -11 484.972 56.463 1
 2 1 11 537.147 56.158 1
 2 1 11 472.656 41.283 1
 2 1 11 477.69 48.376 3
 2 1 11 398.221 38.344 5
 -2 -1 -12 94.575 38.424 1
 -2 -1 -12 134.417 37.059 1
 2 1 12 78.954 35.434 1
 2 1 12 105.073 38.343 1
 2 1 12 8.896 43.552 3
 2 1 12 42.455 22.784 5
 -2 -1 -13 1185.8 76.6 1
 -2 -1 -13 1237.6 75.8 1
 2 1 13 991.788 72.386 1
 2 1 13 1022.9 72.5 1
 2 1 13 992.735 78.971 3
 2 1 13 967.885 49.978 5
 -2 -1 -14 8577.1 127.3 1
 -2 -1 -14 8412.5 125.5 1
 2 1 14 8205.9 121.7 1
 2 1 14 8073.6 121.7 1
 2 1 14 7885.4 133 3
 2 1 14 7346.1 89.1 5
 -2 -1 -15 5871.9 125.5 1
 -2 -1 -15 5918.7 120.5 1
 2 1 15 4627.3 137.9 1
 2 1 15 5838.1 115.7 1
 2 1 15 5272.1 123.4 3
 2 1 15 4984.9 81.3 5
 -2 -1 -16 2231.7 107.2 1
 -2 -1 -16 2145.2 102.1 1
 2 1 16 2081.1 99.3 1
 2 1 16 2250.8 103.9 1
 2 1 16 1955.4 104.2 3
 2 1 16 1862.4 67 5
 -2 -1 -17 518.394 64.176 1
 -2 -1 -17 718.553 66.933 1
 2 1 17 560.654 62.478 1
 2 1 17 494.101 63.105 1
 2 1 17 572.69 74.396 3
 2 1 17 522.715 60.289 5
 -2 -1 -18 45.992 59.819 1
 -2 -1 -18 79.389 57.522 1
 2 1 18 96.904 55.816 1
 2 1 18 23.694 57.687 1
 2 1 18 42.636 66.501 3
 2 1 18 53.258 33.613 5
 -2 -1 -19 119.639 67.058 1
 -2 -1 -19 109.638 63.537 1
 2 1 19 28.362 58.318 1
 2 1 19 -40.333 62.85 1
 2 1 19 150.176 70.298 3
 2 1 19 -22.504 35.353 5
 -2 -1 -20 268.586 74.572 1
 -2 -1 -20 196.164 72.275 1
 2 1 20 187.428 62.951 1
 2 1 20 340.956 76.26 1
 2 1 20 259.48 76.405 3
 2 1 20 182.423 42.215 5
 -2 -2 21 129.174 93.49 1
 -2 -2 21 68.399 102.67 1
 2 2 -21 7.021 97.378 1
 2 2 -21 -109.128 107.893 1
 2 2 -21 -26.516 86.373 4
 -2 -2 20 563.991 91.957 1
 -2 -2 20 450.167 101.376 1
 -2 -2 20 469.035 81.518 5
 2 2 -20 706.944 99.906 1
 2 2 -20 321.546 100.788 1
 2 2 -20 402.375 85.441 4
 -2 -2 19 -69.071 78.847 1
 -2 -2 19 38.255 65.432 5
 2 2 -19 132.671 82.397 1
 2 2 -19 -173.327 77.367 1
 2 2 -19 5.153 69.551 4
 -2 -2 18 -221.645 76.186 1
 -2 -2 18 -99.694 58.197 5
 2 2 -18 -12.997 68.252 1
 2 2 -18 -170.559 68.223 1
 2 2 -18 -94.01 63.405 4
 -2 -2 17 -83.327 69.268 1
 -2 -2 17 70.948 58.462 5
 2 2 -17 -46.442 61.197 1
 2 2 -17 35.141 71.287 1
 2 2 -17 -75.778 58.452 4
 -2 -2 16 -12.664 64.728 1
 -2 -2 16 -39.57 54.763 5
 2 2 -16 80.269 64.288 1
 2 2 -16 -29.381 66.919 1
 2 2 -16 48.588 55.26 4
 -2 -2 15 140.387 64.667 1
 2 2 -15 145.423 62.554 1
 2 2 -15 187.978 57.286 4
 -2 -2 14 257.079 62.165 1
 -2 -2 14 159.256 51.478 5
 2 2 -14 256.404 61.565 1
 2 2 -14 223.678 59.873 1
 2 2 -14 264.453 58.843 4
 -2 -2 13 496.042 60.215 1
 -2 -2 13 337.694 53.284 5
 2 2 -13 513.045 61.903 1
 2 2 -13 515.225 60.034 1
 2 2 -13 514.655 58.925 4
 -2 -2 12 654.832 61.828 1
 2 2 -12 727.922 88.349 1
 2 2 -12 726.231 86.943 1
 2 2 -12 817.041 85.351 4
 -2 -2 11 919.415 84.073 1
 2 2 -11 1044.8 85.1 1
 2 2 -11 1003 82.5 1
 2 2 -11 865.331 80.398 4
 -2 -2 10 114.205 43.72 1
 2 2 -10 129.128 44.356 1
 2 2 -10 14.58 40.068 1
 2 2 -10 1.36 36.051 4
 -2 -2 9 22267 186.1 1
 2 2 -9 21870.1 184.4 1
 2 2 -9 22236.6 185.7 1
 2 2 -9 21777.5 180.6 4
 -2 -2 8 5125.6 98.4 1
 -2 -2 8 5008.2 101 1
 2 2 -8 4950.4 101.7 1
 2 2 -8 5184.3 103.7 1
 2 2 -8 5072.3 99.2 4
 -2 -2 7 5051.6 94 1
 -2 -2 7 5227 95.6 1
 2 2 -7 5060.4 95.8 1
 2 2 -7 5214.9 96.2 1
 2 2 -7 5045.7 95 4
 -2 -2 6 1648.3 67.1 1
 -2 -2 6 1733.6 67 1
 2 2 -6 1651.1 69.4 1
 2 2 -6 1745.6 66.2 1
 2 2 -6 1739.9 69 4
 -2 -2 5 28979.3 173.4 1
 -2 -2 5 29464.8 173.9 1
 -2 -2 5 29415.5 177.2 4
 2 2 -5 29152 174.2 1
 2 2 -5 29225 172.8 1
 2 2 -5 29058.7 175.8 4
 -2 -2 4 381.65 37.17 1
 -2 -2 4 378.472 35.93 1
 -2 -2 4 271.383 32.364 4
 2 2 -4 331.39 33.017 1
 2 2 -4 311.957 32.148 1
 2 2 -4 213.839 31.457 4
 -2 -2 3 10050.6 98 1
 -2 -2 3 10546.2 101.2 1
 -2 -2 3 10206.9 105.9 4
 2 2 -3 10070.6 99.4 1
 2 2 -3 10781.3 101.7 1
 2 2 -3 10087.1 105.3 4
 -2 -2 2 8880.4 89.8 1
 -2 -2 2 8782.7 89.2 1
 -2 -2 2 8496.9 97.4 4
 2 2 -2 8706.5 88.3 1
 2 2 -2 8646.2 88.9 1
 2 2 -2 8570 98.1 4
 -2 -2 1 61905.5 204.4 1
 -2 -2 1 62966.4 206.1 1
 -2 -2 1 60915.2 230.8 4
 2 2 -1 61721.9 203.5 1
 2 2 -1 62563.7 205.2 1
 2 2 -1 63860 219.2 2
 2 2 -1 61963.2 233.3 4
 -2 -2 0 30962.9 141.2 1
 -2 -2 0 31473.7 142.3 1
 -2 -2 0 31421.2 169.6 4
 2 2 0 31104.6 141.3 1
 2 2 0 30479.8 139.6 1
 2 2 0 31844.3 151.8 2
 2 2 0 32742.7 171.5 3
 2 2 0 30988.9 168.8 4
 -2 -2 -1 11023.3 86.2 1
 -2 -2 -1 11237.9 88.2 1
 -2 -2 -1 10937.5 107.5 4
 2 2 1 11259.9 88.3 1
 2 2 1 11269.6 88.3 1
 2 2 1 11147.2 92.2 2
 2 2 1 11360.7 107.5 3
 2 2 1 10835.7 107 4
 -2 -2 -2 1954.2 49.1 1
 -2 -2 -2 1964.5 49.5 1
 -2 -2 -2 1947 64.6 4
 2 2 2 1906.6 49.5 1
 2 2 2 1971 48 1
 2 2 2 1927.5 50.4 2
 2 2 2 2002.8 60.7 3
 2 2 2 1917.6 62 4
 -2 -2 -3 31690 135.1 1
 -2 -2 -3 32103.4 136.6 1
 -2 -2 -3 33351.2 143 2
 -2 -2 -3 32511.3 185.5 4
 2 2 3 32216.7 136.2 1
 2 2 3 32520.9 136.7 1
 2 2 3 32316.8 139.9 2
 2 2 3 33338.5 175.8 3
 2 2 3 30619 178.9 4
 -2 -2 -4 11448.9 88.6 1
 -2 -2 -4 11643 88.8 1
 -2 -2 -4 11643.3 89 2
 -2 -2 -4 11505.7 121.5 4
 2 2 4 11519.4 88 1
 2 2 4 11469.4 87.8 1
 2 2 4 11756.1 112 3
 -2 -2 -5 10037.2 85.3 1
 -2 -2 -5 10331.5 87.5 1
 -2 -2 -5 10347.5 84.4 2
 -2 -2 -5 10227.8 120 4
 2 2 5 9848.9 83.5 1
 2 2 5 10158.3 84.9 1
 2 2 5 10237.7 107.4 3
 -2 -2 -6 12202.2 96.7 1
 -2 -2 -6 12185.8 96.1 1
 -2 -2 -6 12468.9 91.9 2
 -2 -2 -6 12105.4 133.6 4
 2 2 6 12374.3 97.1 1
 2 2 6 12403.9 96.6 1
 2 2 6 12321.9 117.7 3
 -2 -2 -7 104.269 26.233 1
 -2 -2 -7 140.232 27.528 1
 -2 -2 -7 95.808 26.406 2
 -2 -2 -7 55.659 33.148 4
 2 2 7 97.181 26.962 1
 2 2 7 103.253 27.601 1
 2 2 7 111.7 35.471 3
 -2 -2 -8 20.288 26.865 1
 -2 -2 -8 -35.711 27.322 1
 -2 -2 -8 27.091 26.963 2
 -2 -2 -8 -1.889 30.383 4
 2 2 8 6.226 26.258 1
 2 2 8 55.768 26.528 1
 2 2 8 19.656 33.5 3
 -2 -2 -9 6584.4 91.6 1
 -2 -2 -9 6783.2 91.4 1
 -2 -2 -9 6615.4 78.2 2
 -2 -2 -9 6435.5 119.7 4
 2 2 9 6454.1 87.7 1
 2 2 9 6422.3 88.2 1
 2 2 9 6346.2 99.4 3
 -2 -2 -10 -3.517 32.49 1
 -2 -2 -10 -30.696 32.811 1
 -2 -2 -10 -68.52 27.073 2
 2 2 10 -10.537 32.164 1
 2 2 10 -43.263 31.852 1
 2 2 10 -42.8 38.486 3
 -2 -2 -11 345.468 45.204 1
 -2 -2 -11 272.68 42.748 1
 -2 -2 -11 343.124 38.626 2
 2 2 11 337.615 42.675 1
 2 2 11 434.905 47.158 1
 2 2 11 381.557 49.712 3
 -2 -2 -12 40.413 42.1 1
 -2 -2 -12 21.787 39.818 1
 -2 -2 -12 14.584 37.474 2
 2 2 12 60.98 38.941 1
 2 2 12 -9.404 42.403 1
 2 2 12 -8.603 44.701 3
 -2 -2 -13 -0.35 46.415 1
 -2 -2 -13 -115.303 42.971 1
 -2 -2 -13 -46.178 38.531 2
 2 2 13 -27.285 41.801 1
 2 2 13 -41.068 48.369 3
 -2 -2 -14 37.77 47.64 1
 -2 -2 -14 102.277 51.031 1
 -2 -2 -14 86.588 43.317 2
 2 2 14 -70.469 88.194 1
 2 2 14 95.326 51.209 1
 2 2 14 87.97 54.568 3
 -2 -2 -15 505.428 63.273 1
 -2 -2 -15 506.843 63.99 1
 -2 -2 -15 657.092 59.057 2
 2 2 15 555.863 60.908 1
 2 2 15 640.124 66.488 1
 2 2 15 538.917 69.024 3
 -2 -2 -16 147.436 60.189 1
 -2 -2 -16 200.393 60.4 1
 2 2 16 198.507 57.571 1
 2 2 16 109.349 59.591 1
 2 2 16 162.676 63.525 3
 -2 -2 -17 612.439 73.101 1
 -2 -2 -17 666.253 72.74 1
 2 2 17 592.671 68.217 1
 2 2 17 591.208 68.936 1
 2 2 17 681.926 76.133 3
 -2 -2 -18 -57.915 65.732 1
 -2 -2 -18 -16.677 66.837 1
 -2 -2 -18 42.38 52.105 2
 2 2 18 -50.675 58.99 1
 2 2 18 173.218 59.212 1
 2 2 18 17.396 67.111 3
 -2 -2 -19 144.149 74.138 1
 -2 -2 -19 262.569 74.721 1
 -2 -2 -19 196.68 59.661 2
 2 2 19 48.835 65.301 1
 2 2 19 497.31 75.391 1
 2 2 19 140.706 72.848 3
 -2 -3 21 4.565 91.316 1
 -2 -3 21 -88.336 95.898 1
 2 3 -21 30.131 88.926 1
 2 3 -21 -60.705 94.176 1
 2 3 -21 -9.109 89.094 4
 -2 -3 20 94.613 85.911 1
 -2 -3 20 134.255 99.982 1
 -2 -3 20 225.114 80.971 5
 2 3 -20 246.404 91.406 1
 2 3 -20 300.287 93.332 1
 2 3 -20 321.701 88.11 4
 -2 -3 19 -114.879 74.823 1
 -2 -3 19 -40.772 80.397 1
 -2 -3 19 -60.384 63.82 5
 2 3 -19 -45.531 77.341 1
 2 3 -19 -40.955 71.467 4
 -2 -3 18 -83.834 68.736 1
 -2 -3 18 18.123 80.26 1
 -2 -3 18 -72.57 58.9 5
 2 3 -18 -121.874 72.217 1
 2 3 -18 -143.849 78.476 1
 2 3 -18 46.521 67.383 4
 -2 -3 17 -29.567 65.374 1
 -2 -3 17 118.311 71.341 1
 -2 -3 17 112.995 60.21 5
 2 3 -17 -18.373 68.613 1
 2 3 -17 -58.479 70.188 1
 2 3 -17 41.462 60.035 4
 -2 -3 16 960.313 116.234 1
 -2 -3 16 1061.4 128.2 1
 -2 -3 16 764.138 75.091 5
 2 3 -16 1130.2 129.3 1
 2 3 -16 716.417 86.457 1
 2 3 -16 762.508 74.207 4
 -2 -3 15 188.306 57.517 1
 -2 -3 15 117.214 61.312 1
 -2 -3 15 159.493 58.124 5
 2 3 -15 204.842 64.405 1
 2 3 -15 157.092 68.2 1
 2 3 -15 140.417 58.58 4
 -2 -3 14 25.173 54.391 1
 -2 -3 14 50.943 84.251 1
 -2 -3 14 -32.243 59.557 5
 2 3 -14 -23.904 53.779 1
 2 3 -14 87.161 56.115 1
 2 3 -14 -24.781 51.86 4
 -2 -3 13 1364.7 101.7 1
 -2 -3 13 1348.5 108.6 1
 -2 -3 13 1172.6 100.2 5
 2 3 -13 1343.2 107.7 1
 2 3 -13 1436.2 102.6 1
 2 3 -13 1344.1 100.6 4
 -2 -3 12 -40.581 42.914 1
 -2 -3 12 -39.185 46.612 1
 -2 -3 12 29.449 42.264 5
 2 3 -12 48.113 46.217 1
 2 3 -12 40.236 47.337 1
 2 3 -12 18.8 43.607 4
 -2 -3 11 3118.2 104.8 1
 -2 -3 11 2884.1 103.9 1
 -2 -3 11 3060.2 104.4 5
 2 3 -11 3120.4 107.9 1
 2 3 -11 3018.3 104.8 1
 2 3 -11 2936.4 102.7 4
 -2 -3 10 773.997 80.198 1
 -2 -3 10 904.293 80.087 1
 -2 -3 10 763.068 78.704 5
 2 3 -10 888.037 84.436 1
 2 3 -10 795.132 81.377 1
 2 3 -10 818.798 79.081 4
 -2 -3 9 18862.9 179.1 1
 -2 -3 9 18283.8 175.5 1
 -2 -3 9 18725.2 177.8 5
 2 3 -9 18378.2 178.4 1
 2 3 -9 18729.1 177.4 1
 2 3 -9 18304 176 4
 -2 -3 8 10069.4 132.7 1
 -2 -3 8 10110.7 133.7 1
 -2 -3 8 10282.9 133.8 4
 2 3 -8 10400.9 135.9 1
 2 3 -8 10358.1 133.6 1
 2 3 -8 10493.5 135 4
 -2 -3 7 5562.2 101.3 1
 -2 -3 7 5975.6 105.8 1
 -2 -3 7 5901.1 105.9 4
 2 3 -7 5874.2 105.5 1
 2 3 -7 5988.3 103.7 1
 2 3 -7 5721.8 103.7 4
 -2 -3 6 1234.4 67.7 1
 -2 -3 6 1208.3 68.2 1
 -2 -3 6 1160.1 69.7 4
 2 3 -6 1275.7 71 1
 2 3 -6 1198 67.7 1
 2 3 -6 1073.8 68.1 4
 -2 -3 5 15813 143.1 1
 -2 -3 5 16318.7 144.7 1
 -2 -3 5 16047.4 148.1 4
 2 3 -5 16820.8 148.1 1
 2 3 -5 16717.4 146 1
 -2 -3 4 8854.7 109.6 1
 -2 -3 4 8696 108.4 1
 -2 -3 4 8129.1 111.6 4
 2 3 -4 8500.3 106.9 1
 2 3 -4 8707.3 110.1 1
 2 3 -4 8123.5 111.6 4
 -2 -3 3 39670.8 202.7 1
 -2 -3 3 39449.4 201.7 1
 -2 -3 3 37442.5 208.5 4
 2 3 -3 38261.8 198.5 1
 2 3 -3 39117.9 201.7 1
 2 3 -3 38526.8 211.9 4
 -2 -3 2 67298.5 252 1
 -2 -3 2 67202.6 251.7 1
 -2 -3 2 66752.7 272.4 4
 2 3 -2 66191.6 250.2 1
 2 3 -2 66371.2 250 1
 2 3 -2 66353.1 271.2 4
 -2 -3 1 4388 78.3 1
 -2 -3 1 4596.6 80.3 1
 -2 -3 1 4480.2 87 4
 2 3 -1 4469.1 79.3 1
 2 3 -1 4600.4 78.8 1
 2 3 -1 4520.7 89.1 4
 -2 -3 0 6025.6 83.7 1
 -2 -3 0 6136.5 86.3 1
 -2 -3 0 5853.3 97.3 4
 2 3 0 6137.6 86.8 1
 2 3 0 6082.9 84.7 1
 2 3 0 6131.9 81.6 2
 2 3 0 5666.5 97 4
 -2 -3 -1 48786.6 202.7 1
 -2 -3 -1 50380.7 206.1 1
 -2 -3 -1 48879.3 238.5 4
 2 3 1 49321.9 203.1 1
 2 3 1 49347.6 203.2 1
 2 3 1 49288.6 186.1 2
 2 3 1 47516.2 235.1 4
 -2 -3 -2 107472 295 1
 -2 -3 -2 112201 414 1
 -2 -3 -2 108439 357 4
 -2 -3 -2 106187 327 5
 2 3 2 110318 298 1
 2 3 2 105626 377 1
 2 3 2 107127 355 2
 2 3 2 106183 354 4
 -2 -3 -3 1635.7 57.7 1
 -2 -3 -3 1726.1 61.1 1
 -2 -3 -3 2101.1 78 4
 -2 -3 -3 1762.7 39.9 5
 2 3 3 1700.5 62 1
 2 3 3 1795.1 60.4 1
 2 3 3 1506.3 50.8 2
 2 3 3 1845.6 68.2 3
 2 3 3 1631.7 73.6 4
 -2 -3 -4 8002.5 93.3 1
 -2 -3 -4 7870.8 92.6 1
 -2 -3 -4 8160.7 118.2 4
 2 3 4 8112.6 94 1
 2 3 4 7844.7 91.2 1
 2 3 4 7746.7 73.7 2
 2 3 4 7993.8 102.1 3
 -2 -3 -5 10375.2 105.4 1
 -2 -3 -5 10477.7 105.4 1
 -2 -3 -5 10163.9 131.2 4
 2 3 5 9905 100.7 1
 2 3 5 10130 102.9 1
 2 3 5 10147.5 112.2 3
 -2 -3 -6 3621.4 75.3 1
 -2 -3 -6 3675.5 76.1 1
 -2 -3 -6 3803.9 95.9 4
 2 3 6 3572.7 74.7 1
 2 3 6 3552.2 72.5 1
 2 3 6 3581.6 79.3 3
 -2 -3 -7 489.79 39.786 1
 -2 -3 -7 518.489 54.231 1
 -2 -3 -7 505.689 48.422 4
 2 3 7 532.535 40.815 1
 2 3 7 445.758 39.234 1
 2 3 7 501.283 59.417 3
 -2 -3 -8 22.992 33.587 1
 -2 -3 -8 27.663 31.662 1
 -2 -3 -8 47.558 38.987 4
 2 3 8 38.92 32.884 1
 2 3 8 8.245 31.759 1
 2 3 8 4.581 35.856 3
 -2 -3 -9 3660.7 88.1 1
 -2 -3 -9 3720.4 87.8 1
 -2 -3 -9 3649.7 111.9 4
 2 3 9 3579.3 86.1 1
 2 3 9 3631.2 84.4 1
 2 3 9 3555.1 86.7 3
 -2 -3 -10 2433.3 85.9 1
 -2 -3 -10 2511.2 88.6 1
 -2 -3 -10 2098.1 106.3 4
 2 3 10 2361 86.6 1
 2 3 10 2381.4 81.9 1
 2 3 10 2313.3 82.6 3
 -2 -3 -11 3318.1 99 1
 -2 -3 -11 3271.6 99.3 1
 -2 -3 -11 3071.5 147.4 4
 2 3 11 3151.7 96.4 1
 2 3 11 3107.4 97.6 1
 2 3 11 3060.5 92.2 3
 -2 -3 -12 5622.5 119.6 1
 -2 -3 -12 5606.8 119.3 1
 -2 -3 -12 5907.5 152 4
 2 3 12 5385.7 115.5 1
 2 3 12 5525.8 119.4 1
 2 3 12 5162.8 110.2 3
 -2 -3 -13 -88.752 87.354 1
 -2 -3 -13 12.115 50.312 1
 -2 -3 -13 129.459 57.942 4
 2 3 13 -31.568 49.458 1
 2 3 13 31.624 55.513 1
 2 3 13 -9.713 50.01 3
 -2 -3 -14 1769.1 108.5 1
 -2 -3 -14 1807.7 108.6 1
 -2 -3 -14 2280.3 139.7 4
 2 3 14 1698.5 105.7 1
 2 3 14 1860.7 113 1
 2 3 14 1854.2 95.2 3
 -2 -3 -15 1707.2 116.1 1
 -2 -3 -15 1791 115.1 1
 -2 -3 -15 1974.9 145.7 4
 2 3 15 1725.8 111.1 1
 2 3 15 1438.3 116.2 1
 2 3 15 1757.7 99.1 3
 -2 -3 -16 366.75 65.643 1
 -2 -3 -16 439.501 68.615 1
 -2 -3 -16 235.222 77.17 4
 2 3 16 392.611 66.055 1
 2 3 16 261.564 70.235 1
 2 3 16 448.628 70.069 3
 -2 -3 -17 76.345 67.514 1
 -2 -3 -17 262.476 70.37 1
 -2 -3 -17 41.994 79.258 4
 2 3 17 121.097 63.404 1
 2 3 17 160.554 72.028 1
 2 3 17 97.068 65.867 3
 -2 -3 -18 40.037 72.285 1
 -2 -3 -18 53.045 71.919 1
 -2 -3 -18 -16.655 84.036 4
 2 3 18 -88.11 65.654 1
 2 3 18 -180.928 72.771 1
 2 3 18 134.012 70.118 3
 -2 -4 20 232.099 85.006 1
 -2 -4 20 219.595 100.81 1
 -2 -4 20 -4.036 76.938 5
 2 4 -20 238.658 95.065 1
 2 4 -20 136.999 98.156 1
 2 4 -20 202.826 80.831 4
 -2 -4 19 -12.686 78.488 1
 -2 -4 19 -64.672 84.843 1
 -2 -4 19 77.561 75.09 5
 2 4 -19 129.682 82.238 1
 2 4 -19 225.584 88.163 1
 2 4 -19 267.885 80.997 4
 -2 -4 18 -71.188 72.703 1
 -2 -4 18 189.411 78.569 1
 -2 -4 18 -79.095 66.979 5
 2 4 -18 -53.226 73.144 1
 2 4 -18 -89.359 77.902 1
 2 4 -18 4.191 72.013 4
 -2 -4 17 11.881 69.407 1
 -2 -4 17 31.959 73.134 1
 -2 -4 17 16.055 58.939 5
 2 4 -17 32.409 68.982 1
 2 4 -17 184.512 71.559 1
 2 4 -17 -40.206 68.797 4
 -2 -4 16 541.203 76.619 1
 -2 -4 16 885.014 89.53 1
 -2 -4 16 482.543 71.567 5
 2 4 -16 627.202 84.339 1
 2 4 -16 710.093 83.657 1
 2 4 -16 571.384 79.454 4
 -2 -4 15 203.672 81.037 1
 -2 -4 15 190.677 69.562 1
 -2 -4 15 105.38 59.592 5
 2 4 -15 245.118 67.556 1
 2 4 -15 180.747 68.32 1
 2 4 -15 120.332 64.61 4
 -2 -4 14 125.953 61.218 1
 -2 -4 14 143.424 62.786 1
 -2 -4 14 27.659 52.175 5
 2 4 -14 54.03 74.514 1
 2 4 -14 133.096 65.829 1
 2 4 -14 58.95 55.584 4
 -2 -4 13 491.682 65.725 1
 -2 -4 13 426.885 75.46 1
 -2 -4 13 481.927 60.965 5
 2 4 -13 622.245 70.602 1
 2 4 -13 572.289 67.05 1
 2 4 -13 428.037 63.664 4
 -2 -4 12 932.048 93.957 1
 -2 -4 12 975.078 98.347 1
 -2 -4 12 851.934 97.269 5
 2 4 -12 946.604 100.22 1
 2 4 -12 880.282 98.073 1
 2 4 -12 853.686 96.177 4
 -2 -4 11 3376.1 111.3 1
 -2 -4 11 3700.8 115.8 1
 -2 -4 11 3773.5 117.9 5
 2 4 -11 3698.6 116.3 1
 2 4 -11 3521.3 110.8 1
 2 4 -11 3433.4 112.9 4
 -2 -4 10 54.285 44.268 1
 -2 -4 10 80.14 45.352 1
 -2 -4 10 24.849 41.703 5
 2 4 -10 -85.311 41.402 1
 2 4 -10 24.888 42.955 1
 2 4 -10 58.9 43.425 4
 -2 -4 9 -20.03 38.865 1
 -2 -4 9 0.909 42.651 1
 -2 -4 9 -32.336 33.917 4
 -2 -4 9 -24.471 36.331 5
 2 4 -9 65.127 42.891 1
 2 4 -9 -16.925 37.052 1
 2 4 -9 -3.331 35.229 4
 -2 -4 8 5770.6 115.4 1
 -2 -4 8 5551.6 113.9 1
 -2 -4 8 5891.7 116.2 4
 -2 -4 8 5988.8 117.8 5
 2 4 -8 5925.9 120.2 1
 2 4 -8 5973.5 116.7 1
 2 4 -8 5730.5 114.4 4
 -2 -4 7 3489 95.6 1
 -2 -4 7 3370.6 96.1 1
 -2 -4 7 3401.1 95.7 4
 -2 -4 7 3433.2 94.6 5
 2 4 -7 3443.2 99.3 1
 2 4 -7 3419.9 94.8 1
 2 4 -7 3434.6 94.6 4
 -2 -4 6 92.028 38.39 1
 -2 -4 6 98.754 38.318 1
 -2 -4 6 51.1 34.994 4
 -2 -4 6 99.825 34.305 5
 2 4 -6 -17.239 39.099 1
 2 4 -6 23.973 35.418 4
 -2 -4 5 442.685 43.566 1
 -2 -4 5 454.593 42.132 1
 -2 -4 5 335.162 42.76 4
 -2 -4 5 558.18 64.167 5
 2 4 -5 386.114 39.988 1
 2 4 -5 511.67 46.846 1
 2 4 -5 408.267 46.234 4
 -2 -4 4 1079.7 65.6 1
 -2 -4 4 1104.5 66.8 1
 -2 -4 4 615.137 71.492 4
 -2 -4 4 1158.4 66 5
 2 4 -4 1093.9 65.5 1
 2 4 -4 1204.6 71.8 1
 2 4 -4 673.064 49.252 4
 -2 -4 3 815.358 64.65 1
 -2 -4 3 885.549 63.83 1
 -2 -4 3 434.638 45.398 4
 -2 -4 3 868.057 61.24 5
 2 4 -3 836.414 63.533 1
 2 4 -3 907.333 65.388 1
 2 4 -3 548.03 51.598 4
 -2 -4 2 11492 128.8 1
 -2 -4 2 11506.5 128.8 1
 -2 -4 2 10861.3 137.5 4
 -2 -4 2 11209.7 115.6 5
 2 4 -2 11115.2 126.4 1
 2 4 -2 10976.5 126.7 1
 2 4 -2 10500 135.7 4
 -2 -4 1 54024.6 250.5 1
 -2 -4 1 55750.9 254.9 1
 -2 -4 1 54104.7 272.7 4
 -2 -4 1 54562.2 220.3 5
 2 4 -1 55150.7 253.9 1
 2 4 -1 55018.3 252.8 1
 2 4 -1 54888.6 275.1 4
 -2 -4 0 97763.1 329.4 1
 -2 -4 0 99358 332.3 1
 -2 -4 0 98447.4 365.3 4
 -2 -4 0 97656.5 302.8 5
 2 4 0 99290 332 1
 2 4 0 96415.6 326.4 1
 2 4 0 100469 290 2
 2 4 0 98947.8 365.6 4
 -2 -4 -1 9972.4 120.5 1
 -2 -4 -1 10027.2 120.8 1
 -2 -4 -1 10391.1 135.1 4
 -2 -4 -1 10374.7 93.2 5
 2 4 1 9939 121.4 1
 2 4 1 9832.3 117.8 1
 2 4 1 10147.9 100 2
 2 4 1 10015.9 132.5 4
 -2 -4 -2 11067.3 122.5 1
 -2 -4 -2 11191 122.6 1
 -2 -4 -2 11321 139.7 4
 -2 -4 -2 10912.4 85.4 5
 2 4 2 11175.8 123.5 1
 2 4 2 10891.7 120 1
 2 4 2 10930.6 95.1 2
 2 4 2 11145.5 138.5 4
 -2 -4 -3 15.367 32.79 1
 -2 -4 -3 50.197 33.027 1
 -2 -4 -3 33.634 35.674 4
 -2 -4 -3 18.211 17.069 5
 2 4 3 4.268 33.505 1
 2 4 3 29.33 32.34 1
 2 4 3 5.898 26.246 2
 2 4 3 -52.595 33.776 4
 -2 -4 -4 6892.7 102.4 1
 -2 -4 -4 6853.4 102.2 1
 -2 -4 -4 7017.1 122.9 4
 2 4 4 6775.4 102.1 1
 2 4 4 6737.9 101.7 1
 2 4 4 6567.5 67.9 2
 -2 -4 -5 1281.6 71.4 1
 -2 -4 -5 1401.5 70.4 1
 -2 -4 -5 1364.7 85.3 4
 2 4 5 1348.7 71.2 1
 2 4 5 1292.8 69 1
 -2 -4 -6 2.238 34.672 1
 -2 -4 -6 25.844 37.145 1
 -2 -4 -6 -25.319 38.269 4
 2 4 6 -23.053 33.157 1
 2 4 6 -46.733 33.791 1
 2 4 6 15.454 40.047 3
 -2 -4 -7 -30.812 35.542 1
 -2 -4 -7 -11.021 36.965 1
 -2 -4 -7 -25.814 42.069 4
 2 4 7 -41.073 33.874 1
 2 4 7 -20.351 34.347 1
 2 4 7 -15.24 40.165 3
 -2 -4 -8 153.69 41.92 1
 -2 -4 -8 152.91 43.262 1
 -2 -4 -8 136.047 50.741 4
 2 4 8 161.183 41.064 1
 2 4 8 165.561 42.285 1
 2 4 8 237.955 48.137 3
 -2 -4 -9 1121 81.7 1
 -2 -4 -9 1277.9 82.4 1
 -2 -4 -9 1163.6 100.8 4
 2 4 9 1124.2 83.3 1
 2 4 9 1118.6 79.4 1
 2 4 9 1106.2 75.9 3
 -2 -4 -10 10089.6 141.6 1
 -2 -4 -10 9858.8 137.9 1
 -2 -4 -10 10304.3 180.9 4
 2 4 10 9873.3 139.8 1
 2 4 10 9374.6 134.4 1
 2 4 10 9375.7 127.6 3
 -2 -4 -11 5224.1 137.1 1
 -2 -4 -11 5202.2 120.8 1
 -2 -4 -11 4883.9 150.4 4
 2 4 11 4727.9 123.7 1
 2 4 11 4833.5 117.3 1
 2 4 11 4628.7 107.1 3
 -2 -4 -12 2155.2 108.2 1
 -2 -4 -12 2491.7 111.1 1
 -2 -4 -12 2392.8 140.6 4
 2 4 12 2459.3 112.5 1
 2 4 12 2430 113 1
 2 4 12 2041.9 95.5 3
 -2 -4 -13 16969.3 194.8 1
 -2 -4 -13 17164.4 195.2 1
 -2 -4 -13 17290.8 245.1 4
 2 4 13 16609.7 191 1
 2 4 13 17102.2 195.3 1
 2 4 13 15928.3 169.3 3
 -2 -4 -14 3414.1 133.3 1
 -2 -4 -14 3063.8 129.6 1
 -2 -4 -14 3094.2 161.7 4
 2 4 14 2881 128.6 1
 2 4 14 3153.6 135 1
 2 4 14 3025 113.3 3
 -2 -4 -15 17.768 64.745 1
 -2 -4 -15 47.783 63.808 1
 -2 -4 -15 -21.135 67.433 4
 2 4 15 20.636 60.464 1
 2 4 15 107.858 73.646 1
 2 4 15 53.701 64.535 3
 -2 -4 -16 283.109 72.732 1
 -2 -4 -16 258.635 74.849 1
 -2 -4 -16 259.018 84.8 4
 2 4 16 288.043 71.857 1
 2 4 16 508.078 80.734 1
 2 4 16 328.688 71.822 3
 -2 -4 -17 474.241 84.899 1
 -2 -4 -17 427.088 81.933 1
 -2 -4 -17 350.665 92.602 4
 2 4 17 317.103 77.665 1
 2 4 17 262.14 89.25 1
 2 4 17 489.399 80.347 3
 -2 -5 20 109.135 97.982 1
 -2 -5 20 489.991 103.603 1
 -2 -5 20 136.798 81.811 5
 2 5 -20 89.637 107.376 1
 2 5 -20 352.543 106.394 1
 2 5 -20 280.224 99.12 4
 -2 -5 19 -68.091 83.62 1
 -2 -5 19 114.776 89.532 1
 -2 -5 19 -32.063 78.27 5
 2 5 -19 306.943 98.418 1
 2 5 -19 -199.62 78.066 4
 -2 -5 18 65.532 73.883 1
 -2 -5 18 191.479 84.317 1
 -2 -5 18 59.157 74.928 5
 2 5 -18 -105.63 77.706 1
 2 5 -18 1.695 86.559 1
 2 5 -18 56.552 77.037 4
 -2 -5 17 169.261 72.239 1
 -2 -5 17 264.864 80.644 1
 -2 -5 17 194.284 73.178 5
 2 5 -17 171.824 82.017 1
 2 5 -17 204.744 85.298 1
 2 5 -17 193.92 74.458 4
 -2 -5 16 473.02 66.052 1
 -2 -5 16 768.335 85.186 1
 -2 -5 16 726.371 81.909 5
 2 5 -16 936.1 90.825 1
 2 5 -16 1221.3 140.1 1
 2 5 -16 823.56 87.237 4
 -2 -5 15 -8.91 58.614 1
 -2 -5 15 98.192 68.912 1
 -2 -5 15 18.159 63.223 5
 2 5 -15 196.113 71.833 1
 2 5 -15 179.68 72.97 1
 2 5 -15 94.438 64.023 4
 -2 -5 14 880.227 87.034 1
 -2 -5 14 691.726 73.159 1
 -2 -5 14 786.011 74.83 5
 2 5 -14 723.071 76.508 1
 2 5 -14 964.99 119.517 1
 2 5 -14 898.583 112.261 4
 -2 -5 13 88.79 74.492 1
 -2 -5 13 80.38 63.251 1
 -2 -5 13 76.996 54.057 5
 2 5 -13 -34.422 68.269 1
 2 5 -13 -46.996 53.422 1
 2 5 -13 14.855 49.625 4
 -2 -5 12 66.47 54.502 1
 -2 -5 12 53.522 98.326 1
 -2 -5 12 -3.419 49.211 5
 2 5 -12 39.76 54.32 1
 2 5 -12 -168.537 90.187 1
 2 5 -12 -75.709 49.186 4
 -2 -5 11 1861.5 107.7 1
 -2 -5 11 1849.2 112.1 1
 2 5 -11 1994.7 115.4 1
 2 5 -11 1960.8 106.2 1
 2 5 -11 1392.2 164.6 4
 -2 -5 10 3823.3 123.6 1
 -2 -5 10 3974.6 123.9 1
 -2 -5 10 3845.3 121.3 4
 -2 -5 10 3714.8 122.7 5
 2 5 -10 3801.7 125.9 1
 2 5 -10 3715.7 119 1
 2 5 -10 3728.9 117.4 4
 -2 -5 9 205.94 53.954 1
 -2 -5 9 235.805 52.282 1
 -2 -5 9 142.81 47.037 4
 -2 -5 9 118.173 45.865 5
 2 5 -9 204.934 58.276 1
 2 5 -9 136.394 47.236 1
 2 5 -9 163.556 49.769 4
 -2 -5 8 2251.5 99.8 1
 -2 -5 8 2277.4 99.1 1
 -2 -5 8 2415.8 102.9 4
 -2 -5 8 2450.2 99.4 5
 2 5 -8 2436.5 108.7 1
 2 5 -8 2373.2 98.6 1
 2 5 -8 2407.1 100.4 4
 -2 -5 7 21.798 37.78 1
 -2 -5 7 6.837 43.704 1
 -2 -5 7 -17.956 39.267 4
 -2 -5 7 -22.214 37.091 5
 2 5 -7 -15.035 42.82 1
 2 5 -7 -38.771 38.92 4
 -2 -5 6 783.452 75.822 1
 -2 -5 6 714.5 78.674 1
 -2 -5 6 553.745 53.028 4
 -2 -5 6 680.171 74.072 5
 2 5 -6 773.64 77.333 1
 2 5 -6 730.438 81.308 1
 2 5 -6 672.588 77.516 4
 -2 -5 5 1996 86.5 1
 -2 -5 5 2040.8 85.6 1
 -2 -5 5 2056.5 82.2 5
 2 5 -5 2077.1 84.9 1
 2 5 -5 2141.5 88.2 1
 2 5 -5 2017.3 90.1 4
 -2 -5 4 45.821 38.919 1
 -2 -5 4 7.954 33.067 1
 -2 -5 4 -12.525 38.764 4
 -2 -5 4 31.785 32.584 5
 2 5 -4 3.656 35.744 1
 2 5 -4 47.216 36.86 1
 2 5 -4 1.95 38.146 4
 -2 -5 3 115.269 40.101 1
 -2 -5 3 40.861 39.154 1
 -2 -5 3 77.286 40.853 4
 -2 -5 3 72.293 32.11 5
 2 5 -3 88.527 37.033 1
 2 5 -3 66.772 38.89 1
 2 5 -3 79.34 40.254 4
 -2 -5 2 159.485 40.087 1
 -2 -5 2 150.252 41.661 1
 -2 -5 2 91.808 41.037 4
 -2 -5 2 115.111 31.23 5
 2 5 -2 172.577 40.471 1
 2 5 -2 95.488 42.915 1
 2 5 -2 91.812 38.688 4
 -2 -5 1 5203.5 105.3 1
 -2 -5 1 5299.6 108 1
 -2 -5 1 5046.3 112.3 4
 -2 -5 1 5201.6 87.7 5
 2 5 -1 5257.6 108.3 1
 2 5 -1 5169.9 107.5 1
 2 5 -1 5287 113.5 4
 -2 -5 0 25.912 38.896 1
 -2 -5 0 44.748 39.398 1
 -2 -5 0 -1.498 37.672 4
 -2 -5 0 95.946 27.26 5
 2 5 0 1.811 37.867 1
 2 5 0 20.117 34.719 1
 2 5 0 20.206 38.759 4
 -2 -5 -1 12505.4 144.8 1
 -2 -5 -1 12700.8 146.2 1
 -2 -5 -1 12411.9 158 4
 -2 -5 -1 12497.9 107.8 5
 2 5 1 12596.1 145.1 1
 2 5 1 12044.8 140.8 1
 2 5 1 12557.3 113.1 2
 2 5 1 12389.1 155.7 4
 -2 -5 -2 1618.8 84.2 1
 -2 -5 -2 1610.3 82.7 1
 -2 -5 -2 1683.3 92.3 4
 -2 -5 -2 1761.6 53.3 5
 2 5 2 1617.7 82.8 1
 2 5 2 1744.6 83.1 1
 2 5 2 1547 56.4 2
 2 5 2 1604.3 86.2 4
 -2 -5 -3 545.73 50.925 1
 -2 -5 -3 499.965 49.18 1
 -2 -5 -3 410.199 51.867 4
 -2 -5 -3 537.117 39.425 5
 2 5 3 517.435 52.151 1
 2 5 3 433.668 50.485 1
 2 5 3 513.607 46.336 2
 2 5 3 446.029 52.189 4
 -2 -5 -4 5088.8 109.6 1
 -2 -5 -4 4972.1 107.7 1
 -2 -5 -4 4982.2 122.9 4
 2 5 4 5013 109 1
 2 5 4 4849.3 107 1
 -2 -5 -5 55.587 42.366 1
 -2 -5 -5 70.706 41.322 1
 -2 -5 -5 68.613 48.55 4
 2 5 5 134.268 44.841 1
 2 5 5 90.881 42.916 1
 -2 -5 -6 4662.6 112.4 1
 -2 -5 -6 4643.9 110.7 1
 -2 -5 -6 4530.7 128.1 4
 2 5 6 4473.4 110.1 1
 2 5 6 4454.5 109.6 1
 -2 -5 -7 3024.6 104.3 1
 -2 -5 -7 3113.2 104.6 1
 -2 -5 -7 2772.1 138.7 4
 2 5 7 2862.9 99.6 1
 2 5 7 3075.5 101.3 1
 -2 -5 -8 184.578 50.825 1
 -2 -5 -8 94.797 49.561 1
 -2 -5 -8 93.238 52.527 4
 2 5 8 176.015 89.881 1
 2 5 8 110.398 48.222 1
 -2 -5 -9 841.63 84.539 1
 -2 -5 -9 1123.3 98.3 1
 -2 -5 -9 948.651 111.702 4
 2 5 9 909.964 89.476 1
 2 5 9 1019.9 91.2 1
 -2 -5 -10 24.682 50.109 1
 -2 -5 -10 102.218 55.578 1
 -2 -5 -10 31.913 58.866 4
 2 5 10 76.287 50.343 1
 2 5 10 52.529 48.62 1
 -2 -5 -11 342.712 62.197 1
 -2 -5 -11 346.772 62.022 1
 -2 -5 -11 112.583 65.424 4
 2 5 11 369.254 58.371 1
 2 5 11 308.568 59.716 1
 -2 -5 -12 22.994 56.601 1
 -2 -5 -12 83.282 54.09 1
 -2 -5 -12 -129.094 62.614 4
 2 5 12 105.646 55.964 1
 2 5 12 28.005 57.148 1
 -2 -5 -13 110.157 64.851 1
 -2 -5 -13 234.536 61.906 1
 -2 -5 -13 170.73 70.229 4
 2 5 13 148.535 61.83 1
 2 5 13 407.007 70.07 1
 2 5 13 149.728 64.039 3
 -2 -5 -14 33.302 67.726 1
 -2 -5 -14 -9.915 62.317 1
 -2 -5 -14 118.886 72.079 4
 2 5 14 81.187 65.014 1
 2 5 14 91.088 70.127 1
 2 5 14 -166.221 62.89 3
 -2 -5 -15 65.917 73.583 1
 -2 -5 -15 26.393 69.155 1
 -2 -5 -15 -1.852 79.231 4
 2 5 15 70.968 69.432 1
 2 5 15 -8.154 82.115 1
 2 5 15 -110.18 67.837 3
 -2 -5 -16 132.736 78.895 1
 -2 -5 -16 -11.059 72.05 1
 -2 -5 -16 -15.049 89.455 4
 2 5 16 -81.927 72.573 1
 2 5 16 136.885 88.99 1
 2 5 16 -152.267 73.431 3
 -2 -6 19 289.631 92.161 1
 -2 -6 19 104.703 98.346 1
 -2 -6 19 78.071 88.69 5
 2 6 -19 99.641 92.86 1
 2 6 -19 198.367 107.133 1
 2 6 -19 236.435 94.387 4
 -2 -6 18 295.226 86.569 1
 -2 -6 18 388.839 98.75 1
 -2 -6 18 386.499 87.977 5
 2 6 -18 418.341 97.117 1
 2 6 -18 476.063 104.67 1
 2 6 -18 348.455 73.61 4
 -2 -6 17 393.869 92.457 1
 -2 -6 17 435.315 92.889 1
 -2 -6 17 485.73 88.359 5
 2 6 -17 544.924 97.988 1
 2 6 -17 555.56 93.812 1
 2 6 -17 385.831 80.053 4
 -2 -6 16 621.293 92.16 1
 -2 -6 16 590.908 94.673 1
 -2 -6 16 296.667 77.137 5
 2 6 -16 477.479 80.65 1
 2 6 -16 539.482 86.313 1
 2 6 -16 402.838 76.095 4
 -2 -6 15 1485.2 135.7 1
 -2 -6 15 1599.9 142.3 1
 -2 -6 15 1369.5 146.8 5
 2 6 -15 1332.6 143.6 1
 2 6 -15 1504.2 141.9 1
 2 6 -15 1245.1 133.1 4
 -2 -6 14 -77.744 59.653 1
 -2 -6 14 29.108 67.847 1
 -2 -6 14 -110.752 57.759 5
 2 6 -14 -65.613 66.694 1
 2 6 -14 -106.056 58.699 1
 2 6 -14 27.369 61.805 4
 -2 -6 13 1237.1 120.2 1
 -2 -6 13 1294.4 131.2 1
 -2 -6 13 1203.2 127.3 5
 2 6 -13 1222.2 134.5 1
 2 6 -13 1031.7 116.6 1
 2 6 -13 1157.3 118.6 4
 -2 -6 12 3630.4 142 1
 -2 -6 12 3843.4 143.7 1
 -2 -6 12 3772.9 145.7 5
 2 6 -12 4000.3 152.5 1
 2 6 -12 3980.2 138.3 1
 2 6 -12 3757 137 4
 -2 -6 11 1245.6 113.7 1
 -2 -6 11 1451.7 113.5 1
 -2 -6 11 1544.5 115.5 4
 -2 -6 11 1273.8 114.7 5
 2 6 -11 1403.8 126.8 1
 2 6 -11 1494 113.2 1
 2 6 -11 1355.8 111.7 4
 -2 -6 10 448.054 103.704 1
 -2 -6 10 370.524 70.346 1
 -2 -6 10 348.05 61.568 4
 -2 -6 10 355.797 57.322 5
 2 6 -10 403.202 65.7 1
 2 6 -10 341.169 62.531 1
 2 6 -10 303.765 62.656 4
 -2 -6 9 2136.7 108.2 1
 -2 -6 9 2019.9 111.1 1
 -2 -6 9 1408.2 129.4 4
 -2 -6 9 1944 128.1 5
 2 6 -9 2029.6 116.7 1
 2 6 -9 2301.9 131.4 1
 2 6 -9 1929.3 110 4
 -2 -6 8 317.401 57.387 1
 -2 -6 8 308.567 61.859 1
 -2 -6 8 206.069 54.658 4
 -2 -6 8 296.813 52.538 5
 2 6 -8 242.53 62.275 1
 2 6 -8 346.036 60.666 1
 2 6 -8 157.063 86.072 4
 -2 -6 7 688.577 66.218 1
 -2 -6 7 490.558 59.849 1
 -2 -6 7 767.932 93.421 4
 -2 -6 7 805.242 91.192 5
 2 6 -7 720.074 66.593 1
 2 6 -7 539.932 58.435 1
 2 6 -7 696.383 63.938 4
 -2 -6 6 456.36 57.963 1
 -2 -6 6 523.569 61.787 1
 -2 -6 6 425.754 60.548 4
 -2 -6 6 432.564 51.043 5
 2 6 -6 588.649 64.668 1
 2 6 -6 513.367 62.215 1
 2 6 -6 431.971 56.535 4
 -2 -6 5 958.059 91.454 1
 -2 -6 5 924.158 88.849 1
 -2 -6 5 833.609 93.032 4
 -2 -6 5 1151.5 87.3 5
 2 6 -5 714.6 86.861 1
 2 6 -5 1044.2 92.8 1
 2 6 -5 981.808 93.724 4
 -2 -6 4 1661.4 95.9 1
 -2 -6 4 1697.7 95.2 1
 -2 -6 4 1641.9 101.8 4
 -2 -6 4 1890.3 89 5
 2 6 -4 1675.2 94.2 1
 2 6 -4 1632.9 100.2 1
 2 6 -4 1577.3 97.4 4
 -2 -6 3 1773 94 1
 -2 -6 3 1783.9 98.9 1
 -2 -6 3 1668.9 105.9 4
 -2 -6 3 1995.2 84.7 5
 2 6 -3 1965 96.5 1
 2 6 -3 1843.2 101.8 1
 2 6 -3 1743.3 100.3 4
 -2 -6 2 2805.7 106 1
 -2 -6 2 2803.5 106.8 1
 -2 -6 2 2548.5 110.6 4
 -2 -6 2 2792.9 87.6 5
 2 6 -2 2846.7 106.7 1
 2 6 -2 2976.5 110.2 1
 2 6 -2 2683.9 107.6 4
 -2 -6 1 1232.8 91.8 1
 -2 -6 1 1028.4 95.3 1
 -2 -6 1 1023.4 97.5 4
 -2 -6 1 1238.8 73 5
 2 6 -1 1045.8 93.6 1
 2 6 -1 1085.2 91.6 1
 2 6 -1 1151.1 90.3 4
 -2 -6 0 12768 166.6 1
 -2 -6 0 13567.1 173.7 1
 -2 -6 0 12958.2 176.5 4
 -2 -6 0 13217.6 130.1 5
 2 6 0 13330.4 170 1
 2 6 0 12719.8 163.4 1
 2 6 0 12830.3 171.9 4
 -2 -6 -1 1570.7 99 1
 -2 -6 -1 1270.1 102.1 1
 -2 -6 -1 1637.6 104.7 4
 -2 -6 -1 1692.1 66.8 5
 2 6 1 1423.3 101.4 1
 2 6 1 1310.3 96.3 1
 2 6 1 1637.9 72.8 2
 2 6 1 1687.9 98.2 4
 -2 -6 -2 1116.2 93.8 1
 -2 -6 -2 1217.2 98.1 1
 -2 -6 -2 1554 105.5 4
 -2 -6 -2 1242.7 57.6 5
 2 6 2 992.583 97.443 1
 2 6 2 1199.1 98 1
 2 6 2 1209.5 60.1 2
 2 6 2 1071 93.5 4
 -2 -6 -3 -70.32 47.105 1
 -2 -6 -3 -57.018 49.151 1
 -2 -6 -3 -6.116 48.188 4
 -2 -6 -3 27.285 23.515 5
 2 6 3 -110.873 50.616 1
 2 6 3 -69.846 46.332 1
 2 6 3 18.882 30.419 2
 2 6 3 -100.328 50.892 4
 -2 -6 -4 -69.842 47.812 1
 -2 -6 -4 -10.744 47.512 1
 -2 -6 -4 -62.33 85.244 4
 2 6 4 -71.514 54.735 1
 2 6 4 -16.883 51.216 1
 -2 -6 -5 -28.873 48.901 1
 -2 -6 -5 34.113 52.136 4
 2 6 5 12.997 48.257 1
 2 6 5 -56.546 48.177 1
 -2 -6 -6 427.799 61.09 1
 -2 -6 -6 311.734 58.306 1
 -2 -6 -6 383.797 64.387 4
 2 6 6 559.971 61.467 1
 2 6 6 504.518 61.232 1
 -2 -6 -7 264.163 58.477 1
 -2 -6 -7 339.19 63.264 1
 -2 -6 -7 239.575 63.459 4
 2 6 7 231.425 55.271 1
 2 6 7 280.068 58.501 1
 -2 -6 -8 -67.623 53.915 1
 -2 -6 -8 35.325 56.447 1
 -2 -6 -8 53.601 59.766 4
 2 6 8 99.816 51.461 1
 2 6 8 68.456 53.638 1
 -2 -6 -9 261.051 63.125 1
 -2 -6 -9 427.494 65.68 1
 -2 -6 -9 351.273 68.838 4
 2 6 9 392.239 61.027 1
 2 6 9 436.218 66.214 1
 -2 -6 -10 30.02 59.169 1
 -2 -6 -10 176.984 63.602 1
 -2 -6 -10 57.843 66.271 4
 2 6 10 148.792 57.394 1
 2 6 10 138.395 59.233 1
 -2 -6 -11 43.587 63.393 1
 -2 -6 -11 -36.63 64.249 1
 2 6 11 54.81 56.977 1
 2 6 11 -3.991 57.67 1
 -2 -6 -12 113.38 73.9 1
 -2 -6 -12 82.814 66.541 1
 -2 -6 -12 -17.508 72.864 4
 2 6 12 64.919 66.564 1
 2 6 12 13.749 69.104 1
 -2 -6 -13 250.143 78.576 1
 -2 -6 -13 65.673 76.368 1
 -2 -6 -13 134.354 87.486 4
 2 6 13 103.678 69.615 1
 2 6 13 240.822 74.866 1
 -2 -6 -14 1456 147.5 1
 -2 -6 -14 1219.7 152 1
 -2 -6 -14 817.084 107.011 4
 2 6 14 1377.6 138 1
 2 6 14 1457.4 164 1
 -2 -7 17 385.132 94.141 1
 -2 -7 17 341.518 102.905 1
 -2 -7 17 447.31 96.781 5
 2 7 -17 506.09 101.661 1
 2 7 -17 461.429 105.155 1
 2 7 -17 305.714 82.844 4
 -2 -7 16 1532.5 156.7 1
 -2 -7 16 1574.9 168.7 1
 -2 -7 16 1431.4 167 5
 2 7 -16 1666.6 168 1
 2 7 -16 1401.9 160.9 1
 2 7 -16 1696.8 156.6 4
 -2 -7 15 2525.8 155.4 1
 -2 -7 15 2474.7 169.7 1
 -2 -7 15 2654 167.7 5
 2 7 -15 2290.3 159.4 1
 2 7 -15 2058 152 1
 2 7 -15 2478.2 151.3 4
 -2 -7 14 86.321 75.649 1
 -2 -7 14 154.097 80.969 1
 -2 -7 14 90.579 65.092 5
 2 7 -14 140.41 76.325 1
 2 7 -14 1.908 63.118 1
 2 7 -14 119.528 67.114 4
 -2 -7 13 1611.2 130.4 1
 -2 -7 13 1159.7 140.1 1
 -2 -7 13 1362.4 140.3 5
 2 7 -13 1434.2 141.9 1
 2 7 -13 1426.7 131.3 1
 2 7 -13 1209.8 126.9 4
 -2 -7 12 98.387 66.361 1
 -2 -7 12 33.665 66.388 1
 -2 -7 12 174.894 63.487 5
 2 7 -12 12.062 66.121 1
 2 7 -12 92.699 65.733 1
 2 7 -12 78.23 59.275 4
 -2 -7 11 2854.7 137.4 1
 -2 -7 11 2913.8 141.8 1
 -2 -7 11 2664.2 137.3 4
 -2 -7 11 2988.7 142.6 5
 2 7 -11 2863.6 147.8 1
 2 7 -11 2680.3 136.9 1
 2 7 -11 3106.7 138.1 4
 -2 -7 10 2341.8 128.9 1
 -2 -7 10 2437.8 133 1
 -2 -7 10 2373.5 130.1 4
 -2 -7 10 2471.6 132.6 5
 2 7 -10 2503.2 134.1 1
 2 7 -10 2368.7 130 1
 2 7 -10 2234.3 123.6 4
 -2 -7 9 19.451 57.809 1
 -2 -7 9 -7.521 62.411 1
 -2 -7 9 17.557 55.597 4
 -2 -7 9 177.764 55.823 5
 2 7 -9 53.447 69.917 1
 -2 -7 8 281.047 61.105 1
 -2 -7 8 351.341 73.958 1
 -2 -7 8 412.987 65.107 4
 -2 -7 8 444.777 61.654 5
 2 7 -8 490.369 71.721 1
 2 7 -8 512.122 74.457 1
 2 7 -8 356.387 59.671 4
 -2 -7 7 84.946 56.575 1
 -2 -7 7 16.137 55.4 1
 -2 -7 7 -38.106 54.808 4
 -2 -7 7 67.344 53.901 5
 2 7 -7 97.093 55.863 1
 2 7 -7 93.149 58.062 1
 2 7 -7 -89.923 49.814 4
 -2 -7 6 514.112 65.802 1
 -2 -7 6 542.242 61.421 1
 -2 -7 6 402.227 69.099 4
 -2 -7 6 559.724 59.189 5
 2 7 -6 524.972 63.107 1
 2 7 -6 635.866 72.375 1
 2 7 -6 334.198 66.345 4
 -2 -7 5 137.588 56.977 1
 -2 -7 5 37.659 50.62 1
 -2 -7 5 -104.718 48.139 4
 -2 -7 5 61.81 46.85 5
 2 7 -5 8.012 48.582 1
 2 7 -5 61.426 56.095 1
 -2 -7 4 8804.6 164.5 1
 -2 -7 4 8902.1 163.7 1
 -2 -7 4 8818.7 170.9 4
 -2 -7 4 9354 150.3 5
 2 7 -4 8607.1 164.1 1
 2 7 -4 9241.2 169.6 1
 2 7 -4 8805.3 167.1 4
 -2 -7 3 17192.9 211.8 1
 -2 -7 3 17222.2 213 1
 -2 -7 3 16768.5 214.3 4
 -2 -7 3 16849.9 179.9 5
 2 7 -3 16569.5 207.5 1
 2 7 -3 17101.3 214.3 1
 2 7 -3 16387 209.5 4
 -2 -7 2 1092.1 114.7 1
 -2 -7 2 1029.2 84.6 1
 -2 -7 2 1547.4 118.6 4
 -2 -7 2 1746.8 93.5 5
 2 7 -2 942.791 115.81 1
 2 7 -2 1029 112.2 1
 2 7 -2 1095.3 106.1 4
 -2 -7 1 11503.9 182.5 1
 -2 -7 1 11671.8 186.6 1
 -2 -7 1 12235.8 189.9 4
 -2 -7 1 11846 144.1 5
 2 7 -1 10908.6 179.5 1
 2 7 -1 11223.8 176.6 1
 2 7 -1 11593.1 180.5 4
 -2 -7 0 3768.7 135.3 1
 -2 -7 0 3977.3 141.4 1
 -2 -7 0 4309.8 139.9 4
 -2 -7 0 4403.4 99.8 5
 2 7 0 3854.7 137.2 1
 2 7 0 3540 130.5 1
 2 7 0 3710.8 132.2 4
 -2 -7 -1 -141.824 51.768 1
 -2 -7 -1 -145.26 58.441 1
 -2 -7 -1 97.588 51.119 4
 -2 -7 -1 57.415 32.27 5
 2 7 1 -103.251 55.138 1
 2 7 1 -33.599 58.539 1
 2 7 1 26.318 43.401 2
 -2 -7 -2 2853.4 124.4 1
 -2 -7 -2 2835.3 129.8 1
 -2 -7 -2 3213.4 134.6 4
 -2 -7 -2 3263.1 76.8 5
 2 7 2 2724.7 127 1
 2 7 2 2770.7 126.7 1
 2 7 2 2904.5 74.7 2
 2 7 2 2719.7 124.7 4
 -2 -7 -3 -116.585 57.179 1
 -2 -7 -3 -136.028 53.535 1
 -2 -7 -3 57.98 58.206 4
 -2 -7 -3 30.467 27.068 5
 2 7 3 -115.57 53.844 1
 2 7 3 -46.878 60.956 1
 -2 -7 -4 -17.148 56.67 1
 -2 -7 -4 -147.202 54.309 1
 -2 -7 -4 -19.439 56.199 4
 2 7 4 54.22 56.629 1
 2 7 4 -6.468 59.5 1
 -2 -7 -5 -32.376 58.024 1
 -2 -7 -5 58.098 58.116 1
 -2 -7 -5 6.969 57.878 4
 2 7 5 -12.825 59.355 1
 2 7 5 -22.224 60.672 1
 -2 -7 -6 89.981 61.392 1
 -2 -7 -6 -33.23 57.191 1
 -2 -7 -6 19.873 58.217 4
 2 7 6 36.752 61.361 1
 2 7 6 117.711 61.789 1
 -2 -7 -7 492.012 73.097 1
 -2 -7 -7 570.878 72.587 1
 -2 -7 -7 389.778 73.834 4
 2 7 7 435.158 70.375 1
 2 7 7 492.678 74.73 1
 -2 -7 -8 14.87 65.951 1
 -2 -7 -8 -4.185 64.54 1
 -2 -7 -8 213.33 70.076 4
 2 7 8 51.865 62.48 1
 2 7 8 178.348 63.121 1
 -2 -7 -9 -85.104 66.503 1
 -2 -7 -9 -32.254 64.809 1
 -2 -7 -9 -0.09185 69.448 4
 2 7 9 13.803 64.904 1
 2 7 9 25.671 65.16 1
 -2 -7 -10 -43.962 70.792 1
 -2 -7 -10 18.332 67.212 1
 -2 -7 -10 -187.991 72.544 4
 2 7 10 28.766 66.627 1
 2 7 10 -61.92 68.125 1
 -2 -7 -11 -80.42 70.51 1
 -2 -7 -11 -89.238 74.558 1
 -2 -7 -11 48.293 83.332 4
 2 7 11 172.939 72.453 1
 2 7 11 -51.923 70.441 1
 -2 -7 -12 185.39 82.418 1
 -2 -7 -12 0.03561 77.9254 1
 -2 -7 -12 -71.667 80.231 4
 2 7 12 -34.957 71.337 1
 2 7 12 100.494 77.536 1
 -2 -8 15 95.577 84.136 1
 -2 -8 15 85.783 87.019 1
 -2 -8 15 206.177 86.194 5
 2 8 -15 183.531 89.186 1
 2 8 -15 208.419 92.908 1
 2 8 -15 359.491 87.906 4
 -2 -8 14 342.96 92.228 1
 -2 -8 14 265.316 89.965 1
 -2 -8 14 277.485 78.483 5
 2 8 -14 404.542 93.993 1
 2 8 -14 448.881 90.026 1
 2 8 -14 210.278 78.864 4
 -2 -8 13 2057.6 157.2 1
 -2 -8 13 2012.7 167.4 1
 -2 -8 13 1975.3 160.6 5
 2 8 -13 2335.9 170.3 1
 2 8 -13 2275.2 156.2 1
 2 8 -13 2227.1 151 4
 -2 -8 12 215.272 72.93 1
 -2 -8 12 102.571 74.667 1
 -2 -8 12 152.199 72.252 5
 2 8 -12 242.73 81.542 1
 2 8 -12 44.254 73.341 1
 2 8 -12 76.369 63.358 4
 -2 -8 11 26.94 69.55 1
 -2 -8 11 138.119 71.754 1
 -2 -8 11 50.697 65.835 4
 -2 -8 11 109.95 69.298 5
 2 8 -11 130.663 76.227 1
 2 8 -11 117.48 68.091 1
 2 8 -11 189.286 68.554 4
 -2 -8 10 443.442 75.312 1
 -2 -8 10 403.209 85.185 1
 -2 -8 10 443.677 73.506 4
 -2 -8 10 359.792 72.401 5
 2 8 -10 463.894 81.669 1
 2 8 -10 341.08 66.488 4
 -2 -8 9 282.376 69.555 1
 -2 -8 9 339.739 80.866 1
 -2 -8 9 304.844 71.525 4
 -2 -8 9 218.398 64.941 5
 2 8 -9 302.624 72.779 1
 2 8 -9 344.493 76.939 1
 2 8 -9 199.835 63.268 4
 -2 -8 8 109.022 63.031 1
 -2 -8 8 -80.275 62.833 1
 -2 -8 8 -35.77 57.323 4
 -2 -8 8 -26.007 57.532 5
 2 8 -8 -5.763 69.063 1
 2 8 -8 17.693 66.788 1
 2 8 -8 -101.242 57.491 4
 -2 -8 7 40.89 60.758 1
 -2 -8 7 41.705 63.76 1
 -2 -8 7 -123.995 55.017 4
 -2 -8 7 63.256 57.261 5
 2 8 -7 -63.274 63.203 1
 2 8 -7 -29.005 61.1 1
 2 8 -7 -105.236 57.194 4
 -2 -8 6 148.826 62.748 1
 -2 -8 6 44.09 63.527 1
 -2 -8 6 -98.362 57.154 4
 -2 -8 6 129.178 56.219 5
 2 8 -6 5.611 59.066 1
 2 8 -6 162.819 86.868 1
 -2 -8 5 434.723 70.583 1
 -2 -8 5 355.799 101.272 1
 -2 -8 5 289.575 69.575 4
 -2 -8 5 534.978 75.012 5
 2 8 -5 468.432 70.379 1
 2 8 -5 621.179 83.251 1
 2 8 -5 186.326 65.234 4
 -2 -8 4 134.311 69.131 1
 -2 -8 4 53.893 64.03 1
 -2 -8 4 41.34 66.511 4
 -2 -8 4 41.657 49.141 5
 2 8 -4 147.743 64.237 1
 2 8 -4 211.326 70.617 1
 2 8 -4 -119.829 61.6 4
 -2 -8 3 2579 139.4 1
 -2 -8 3 2422.5 139.2 1
 -2 -8 3 2252.7 139.9 4
 -2 -8 3 2734.5 116.5 5
 2 8 -3 2420.1 136.6 1
 2 8 -3 2572 137.7 1
 2 8 -3 1930.8 128.5 4
 -2 -8 2 13737.7 208.9 1
 -2 -8 2 13854.3 213 1
 -2 -8 2 13639.9 218.7 4
 -2 -8 2 13785 172.4 5
 2 8 -2 13559.8 211 1
 2 8 -2 13775.7 210 1
 2 8 -2 12685.8 206.5 4
 -2 -8 1 5445.5 162.7 1
 -2 -8 1 5467.5 162 1
 -2 -8 1 5601.5 173.1 4
 -2 -8 1 5325.4 120.2 5
 2 8 -1 4805.7 157.1 1
 2 8 -1 5434.9 159.4 1
 2 8 -1 4409.3 154.4 4
 -2 -8 0 1733.7 132.6 1
 -2 -8 0 1953.7 138.8 1
 -2 -8 0 1697 142.4 4
 -2 -8 0 1612.4 92.4 5
 2 8 0 1805.6 134.5 1
 2 8 0 2021.7 135.9 1
 2 8 0 1891.5 91.5 2
 2 8 0 1054.8 126.3 4
 -2 -8 -1 6415.9 169 1
 -2 -8 -1 6463.8 172.4 1
 -2 -8 -1 6423.6 176.3 4
 -2 -8 -1 5956.6 110.7 5
 2 8 1 5815 158.2 1
 2 8 1 6425.4 167.9 1
 2 8 1 5613.1 104 2
 2 8 1 5603.2 160.7 4
 -2 -8 -2 3287.8 146.1 1
 -2 -8 -2 2956.7 153 1
 -2 -8 -2 2780.1 148.6 4
 -2 -8 -2 2906.7 84.1 5
 2 8 2 3100.8 144.4 1
 2 8 2 2859.8 148.9 1
 2 8 2 2493.4 78 2
 2 8 2 2552.7 134.5 4
 -2 -8 -3 721.746 85.494 1
 -2 -8 -3 640.814 82.507 1
 -2 -8 -3 572.129 81.465 4
 -2 -8 -3 514.129 59.699 5
 2 8 3 490.748 78.073 1
 2 8 3 665.072 82.302 1
 -2 -8 -4 -8.585 69.445 1
 -2 -8 -4 -49.041 65.233 1
 -2 -8 -4 58.465 67.422 4
 2 8 4 -52.36 65.564 1
 2 8 4 -18.671 70.323 1
 -2 -8 -5 262.11 76.02 1
 -2 -8 -5 294.73 77.595 1
 -2 -8 -5 313.422 77.961 4
 2 8 5 255.328 73.383 1
 2 8 5 322.873 79.465 1
 -2 -8 -6 232.823 81.463 1
 -2 -8 -6 365.298 76.513 1
 -2 -8 -6 84.459 75.283 4
 2 8 6 322.908 74.937 1
 2 8 6 196.954 76.962 1
 -2 -8 -7 -62.332 73.152 1
 -2 -8 -7 10.369 77.406 1
 -2 -8 -7 14.656 73.724 4
 2 8 7 -6.11 71.172 1
 2 8 7 -137.946 72.888 1
 -2 -8 -8 -36.786 78.055 1
 -2 -8 -8 -110.648 81.96 1
 -2 -8 -8 55.366 76.595 4
 2 8 8 172.275 82.305 1
 2 8 8 220.778 76.669 1
 -2 -8 -9 -72.581 80.731 1
 -2 -8 -9 -7.889 84.844 1
 -2 -8 -9 -134.562 80.602 4
 2 8 9 -107.958 75.982 1
 2 8 9 127.987 80.686 1
 -2 -9 13 -78.009 97.287 1
 -2 -9 13 167.786 88.505 5
 2 9 -13 132.481 97 1
 2 9 -13 -199.792 83.266 1
 2 9 -13 131.465 82.892 4
 -2 -9 12 -113.308 84.19 1
 -2 -9 12 199.795 99.593 1
 -2 -9 12 131.302 82.043 4
 -2 -9 12 63.59 81.248 5
 2 9 -12 75.454 90.209 1
 2 9 -12 19.574 89.932 1
 2 9 -12 96.555 81.065 4
 -2 -9 11 238.045 84.647 1
 -2 -9 11 281.344 100.026 1
 -2 -9 11 67.567 79.017 4
 -2 -9 11 284.47 80.207 5
 2 9 -11 152.223 92.842 1
 2 9 -11 168.604 76.692 4
 -2 -9 10 138.798 81.048 1
 -2 -9 10 49.256 88.25 1
 -2 -9 10 24.282 76.423 4
 -2 -9 10 208.714 72.119 5
 2 9 -10 142.128 79.804 1
 2 9 -10 111.125 72.113 4
 -2 -9 9 154.81 78.582 1
 -2 -9 9 119.124 86.843 1
 -2 -9 9 80.175 76.95 4
 -2 -9 9 199.054 75.259 5
 2 9 -9 206.678 77.8 1
 2 9 -9 31.841 79.88 1
 2 9 -9 -12.17 66.521 4
 -2 -9 8 144.243 80.435 1
 -2 -9 8 -17.593 81.805 1
 -2 -9 8 85.067 74.649 4
 -2 -9 8 18.824 66.996 5
 2 9 -8 -15.239 76.083 1
 2 9 -8 -8.512 75.219 1
 2 9 -8 3.384 64.107 4
 -2 -9 7 54.195 75.845 1
 -2 -9 7 121.681 72.204 1
 -2 -9 7 138.284 70.513 4
 -2 -9 7 151.175 66.348 5
 2 9 -7 213.187 79.299 1
 2 9 -7 285.953 83.738 1
 2 9 -7 70.375 69.513 4
 -2 -9 6 578.865 88.225 1
 -2 -9 6 561.364 78.867 1
 -2 -9 6 634.429 88.83 4
 -2 -9 6 615.905 73.313 5
 2 9 -6 614.837 91.355 1
 2 9 -6 667.906 93.161 1
 2 9 -6 397.263 77.138 4
 -2 -9 5 152.048 67.372 1
 -2 -9 5 99.451 61.064 1
 -2 -9 5 84.547 68.172 4
 -2 -9 5 108.961 62.213 5
 2 9 -5 46.319 67.668 1
 2 9 -5 80.827 77.781 1
 2 9 -5 -143.328 62.787 4
 -2 -9 4 280.892 78.655 1
 -2 -9 4 40.067 69.695 1
 -2 -9 4 45.534 72.374 4
 -2 -9 4 179.535 60.707 5
 2 9 -4 295.425 76.352 1
 2 9 -4 181.179 77.772 1
 2 9 -4 45.585 68.107 4
 -2 -9 3 63.92 71.428 1
 -2 -9 3 44.294 74.842 1
 -2 -9 3 -31.003 67.235 4
 -2 -9 3 -39.276 91.949 5
 2 9 -3 200.546 72.571 1
 2 9 -3 52.138 75.527 1
 2 9 -3 -66.852 65.481 4
 -2 -9 2 280.273 80.508 1
 -2 -9 2 157.249 77.993 1
 -2 -9 2 174.647 78.794 4
 -2 -9 2 191.656 56.73 5
 2 9 -2 294.318 73.243 1
 2 9 -2 214.619 74.828 1
 2 9 -2 76.673 69.632 4
 -2 -9 1 622.862 87.183 1
 -2 -9 1 699.92 93.562 1
 -2 -9 1 696.341 92.116 4
 -2 -9 1 520.917 60.96 5
 2 9 -1 584.129 84.309 1
 2 9 -1 697.324 142.841 1
 2 9 -1 376.857 77.489 4
 -2 -9 0 1512.5 149.8 1
 -2 -9 0 1042.5 99.2 1
 -2 -9 0 1608.8 160.2 4
 -2 -9 0 849.179 96.71 5
 2 9 0 1045.9 97.5 1
 2 9 0 1538 188.7 1
 2 9 0 1401.5 98 2
 2 9 0 1286.8 135.1 4
 -2 -9 -1 547.011 85.268 1
 -2 -9 -1 588.924 93.393 1
 -2 -9 -1 364.972 82.981 4
 -2 -9 -1 314.566 48.656 5
 2 9 1 557.678 84.328 1
 2 9 1 479.598 90.833 1
 2 9 1 333.037 51.815 2
 2 9 1 445.889 76.393 4
 -2 -9 -2 -53.184 77.291 1
 -2 -9 -2 -41.692 90.955 1
 -2 -9 -2 -31.121 75.944 4
 -2 -9 -2 -40.534 38.007 5
 2 9 2 -123.404 73.47 1
 2 9 2 -112.873 77.636 1
 -2 -9 -3 -33.781 81.735 1
 -2 -9 -3 17.85 93.244 1
 -2 -9 -3 -101.303 76.506 4
 2 9 3 168.567 78.987 1
 2 9 3 93.082 85.849 1
 -2 -9 -4 132.337 85.553 1
 -2 -9 -4 73.425 101.31 1
 -2 -9 -4 30.463 79.053 4
 2 9 4 64.176 79.592 1
 2 9 4 26.649 86.247 1
 -2 -9 -5 32.678 84.808 1
 -2 -9 -5 -5.944 98.907 1
 -2 -9 -5 -198.05 81.842 4
 2 9 5 12.47 80.608 1
 2 9 5 -25.39 87.757 1
 -2 -9 -6 452.283 96.412 1
 -2 -9 -6 258.755 118.083 1
 -2 -9 -6 369.928 95.494 4
 2 9 6 424.806 92.297 1
 2 9 6 -0.655 92.158 1
 -2 -10 7 240.867 88.092 1
 -2 -10 7 167.481 76.039 1
 -2 -10 7 39.466 84.084 4
 -2 -10 7 43.518 76.76 5
 2 10 -7 155.784 94.175 1
 2 10 -7 -70.72 86.328 1
 2 10 -7 -165.791 76.229 4
 -2 -10 6 -85.628 87.456 1
 -2 -10 6 -154.923 89.588 1
 -2 -10 6 -89.426 77.088 4
 -2 -10 6 50.264 72.286 5
 2 10 -6 -203.822 82.416 1
 2 10 -6 -83.349 90.537 1
 2 10 -6 -103.489 74.134 4
 -2 -10 5 163.937 90.067 1
 -2 -10 5 -9.26 71.513 1
 -2 -10 5 37.435 74.105 4
 -2 -10 5 155.038 70.892 5
 2 10 -5 -30.251 82.596 1
 2 10 -5 -207.903 80.693 1
 2 10 -5 -1.127 83.274 4
 -2 -10 4 248.336 92.732 1
 -2 -10 4 302.381 93.571 1
 -2 -10 4 42.99 78.406 4
 -2 -10 4 278.31 70.945 5
 2 10 -4 186.859 90.839 1
 2 10 -4 178.579 88.098 1
 2 10 -4 2.975 80.638 4
 -2 -10 3 104.181 90.62 1
 -2 -10 3 139.153 89.171 1
 -2 -10 3 -40.693 82.615 4
 -2 -10 3 -39.978 58.364 5
 2 10 -3 179.852 85.24 1
 2 10 -3 100.651 89.06 1
 -2 -10 2 229.283 93.305 1
 -2 -10 2 206.194 97.216 1
 -2 -10 2 246.54 86.255 4
 -2 -10 2 94.913 61.993 5
 2 10 -2 336.904 88.946 1
 2 10 -2 496.381 107.326 1
 2 10 -2 165.797 85.348 4
 -2 -10 1 169.768 93.417 1
 -2 -10 1 31.939 88.596 1
 -2 -10 1 11.311 92.176 4
 -2 -10 1 -146.398 66.07 5
 2 10 -1 106.97 90.268 1
 2 10 -1 -13.798 93.741 1
 2 10 -1 16.165 61.67 2
 2 10 -1 68.338 80.648 4
 -2 -10 0 2.08 86.349 1
 -2 -10 0 15.997 91.333 1
 -2 -10 0 -63.194 91.219 4
 -2 -10 0 -61.23 53.064 5
 2 10 0 -25.023 89.022 1
 2 10 0 114.504 96.992 1
 2 10 0 -69.6 55.229 2
 2 10 0 -13.187 80.248 4
 -3 11 -2 -87.48 91.842 1
 -3 11 -2 317.165 88.006 2
 -3 11 -2 -40.328 71.64 5
 3 -11 2 19.241 85.402 1
 3 -11 2 181.52 103.54 1
 3 -11 2 103.275 60.057 3
 3 -11 2 26.157 58.43 4
 -3 11 -3 -78.36 92.794 1
 -3 11 -3 153.885 96.756 1
 -3 11 -3 64.443 89.314 2
 3 -11 3 1.327 80.531 1
 3 -11 3 63.058 98.199 1
 3 -11 3 -1.455 58.764 3
 3 -11 3 41.452 58.371 4
 -3 11 -4 16.66 100.456 1
 -3 11 -4 141.237 77.674 5
 3 -11 4 259.688 85.802 1
 3 -11 4 110.952 100.64 1
 3 -11 4 155.576 66.699 3
 3 -11 4 197.044 62.81 4
 -3 10 6 103.494 88.804 1
 -3 10 6 41.274 99.678 1
 -3 10 6 44.014 61.923 2
 -3 10 6 121.114 69.138 5
 3 -10 -6 159.157 100.857 1
 3 -10 -6 -229.608 88.253 1
 3 -10 -6 51.284 80.223 4
 -3 10 5 45.777 86.492 1
 -3 10 5 -75.499 93.028 1
 -3 10 5 -41.797 60.952 2
 -3 10 5 58.207 71.563 5
 3 -10 -5 -106.36 83.307 1
 3 -10 -5 140.623 91.763 1
 3 -10 -5 -37.251 57.967 4
 -3 10 4 268.583 96.031 1
 -3 10 4 195.094 94.663 1
 -3 10 4 510.514 67.784 2
 -3 10 4 153.138 70.406 5
 3 -10 -4 226.948 99.431 1
 3 -10 -4 268.648 98.031 1
 3 -10 -4 315.657 63.011 4
 -3 10 3 97.275 83.241 1
 -3 10 3 220.903 87.753 1
 -3 10 3 234.495 69.461 2
 -3 10 3 -77.474 65.768 5
 3 -10 -3 244.284 98.127 1
 3 -10 -3 158.222 87.772 1
 3 -10 -3 148.847 41.934 3
 3 -10 -3 85.817 58.118 4
 -3 10 2 -49.264 82.835 1
 -3 10 2 -107.377 80.158 1
 -3 10 2 45.001 65.703 2
 -3 10 2 -121.976 62.376 5
 3 -10 -2 11.156 92.938 1
 3 -10 -2 -116.951 78.332 1
 3 -10 -2 45.716 45.178 3
 3 -10 -2 -23.736 53.276 4
 -3 10 1 4.498 75.279 1
 -3 10 1 -3.453 79.676 1
 -3 10 1 69.319 68.71 2
 3 -10 -1 72.739 80.637 1
 3 -10 -1 -28.315 87.134 1
 3 -10 -1 42.502 46.449 3
 3 -10 -1 34.896 51.902 4
 -3 10 0 329.679 87.929 1
 -3 10 0 358.966 85.006 1
 -3 10 0 342.949 75.512 2
 -3 10 0 167.351 69.928 5
 3 -10 0 208.236 89.321 1
 3 -10 0 501.094 91.154 1
 3 -10 0 273.747 55.762 3
 3 -10 0 420.276 57.426 4
 -3 10 -1 62.724 82.522 1
 -3 10 -1 -163.335 73.376 1
 -3 10 -1 225.2 76.178 2
 -3 10 -1 224.448 68.785 5
 3 -10 1 49.3 88.055 1
 3 -10 1 -55.744 79.111 1
 3 -10 1 101.123 52.551 3
 3 -10 1 126.779 48.626 4
 -3 10 -2 111.112 75.378 1
 -3 10 -2 -36.589 80.021 1
 -3 10 -2 22.835 74.011 2
 -3 10 -2 -85.029 63.955 5
 3 -10 2 93.869 71.941 1
 3 -10 2 -25.902 80.933 1
 3 -10 2 -43.121 52.755 3
 3 -10 2 101.332 47.639 4
 -3 10 -3 518.371 92.458 1
 -3 10 -3 573.444 96.493 1
 -3 10 -3 612.611 79.384 5
 3 -10 3 636.372 96.898 1
 3 -10 3 610.243 92.383 1
 3 -10 3 472.154 66.276 3
 3 -10 3 827.061 90.599 4
 -3 10 -4 1121.5 108.9 1
 -3 10 -4 1408 160.2 1
 -3 10 -4 1543.1 145.3 5
 3 -10 4 1278.7 147.6 1
 3 -10 4 1296.5 147.3 1
 3 -10 4 1205.9 98.9 3
 3 -10 4 1281.2 97.6 4
 -3 10 -5 549.396 92.948 1
 -3 10 -5 457.73 93.159 1
 -3 10 -5 299.353 49.146 4
 -3 10 -5 330.254 76.059 5
 3 -10 5 339.021 83.364 1
 3 -10 5 446.141 92.46 1
 3 -10 5 443.881 81.129 3
 -3 10 -6 472.259 92.192 1
 -3 10 -6 268.847 85.864 1
 -3 10 -6 196.627 49.535 4
 -3 10 -6 262.328 80.962 5
 3 -10 6 303.783 85.196 1
 3 -10 6 529.501 92.919 1
 3 -10 6 538.862 83.248 3
 3 -10 6 478.236 80.777 5
 -3 10 -7 3813.4 178.9 1
 -3 10 -7 3905.3 180.8 1
 -3 10 -7 3301.8 106.1 4
 -3 10 -7 3574.3 173.9 5
 3 -10 7 3874.2 209.1 1
 3 -10 7 3443.2 178.3 1
 3 -10 7 3918 149.8 3
 3 -10 7 3421.3 170.2 5
 -3 10 -8 2386.6 170.8 1
 -3 10 -8 2530.1 168.7 1
 -3 10 -8 2492.1 103.4 4
 -3 10 -8 2807.2 165.5 5
 3 -10 8 2576.6 239.6 1
 3 -10 8 3106.8 174.5 1
 3 -10 8 2780.9 145.2 3
 3 -10 8 2305.2 162.5 5
 -3 10 -9 119.237 82.107 1
 -3 10 -9 264.909 87.674 1
 -3 10 -9 -34.075 49.109 4
 -3 10 -9 -16.17 67.751 5
 3 -10 9 21.609 130.586 1
 3 -10 9 -74.538 77.804 1
 3 -10 9 59.842 75.92 3
 3 -10 9 172.965 78.703 5
 -3 10 -10 496.788 94.429 1
 -3 10 -10 1317.7 161.8 1
 -3 10 -10 475.672 61.898 4
 -3 10 -10 424.468 92.665 5
 3 -10 10 636.746 91.917 1
 3 -10 10 543.944 92.826 3
 3 -10 10 619.088 88.496 5
 -3 10 -11 34.614 81.38 1
 -3 10 -11 51.061 87.22 1
 -3 10 -11 92.356 55.294 4
 -3 10 -11 79.933 76.935 5
 3 -10 11 -18.141 82.266 1
 3 -10 11 -6.132 83.178 5
 -3 9 9 -66.413 90.289 1
 -3 9 9 -67.947 94.703 1
 -3 9 9 -150.553 63.479 5
 3 -9 -9 114.836 106.968 1
 3 -9 -9 -243.677 85.745 1
 3 -9 -9 0.998 68.23 4
 -3 9 8 -47.049 86.77 1
 -3 9 8 92.819 96.082 1
 -3 9 8 -17.443 63.045 5
 3 -9 -8 -32.104 101.937 1
 3 -9 -8 -16.452 85.998 1
 3 -9 -8 21.153 101.932 4
 -3 9 7 52.612 85.303 1
 -3 9 7 151.909 84.143 1
 -3 9 7 125.682 62.03 5
 3 -9 -7 155.571 98.052 1
 3 -9 -7 -90.912 76.062 1
 3 -9 -7 -8.065 58.258 4
 -3 9 6 -1.043 74.157 1
 -3 9 6 141.337 84.891 1
 -3 9 6 190.494 58.768 2
 -3 9 6 198.088 63.104 5
 3 -9 -6 47.044 84.519 1
 3 -9 -6 226.118 81.289 1
 3 -9 -6 184.282 60.372 4
 -3 9 5 -40.763 67.475 1
 -3 9 5 -31.204 78.11 1
 -3 9 5 105.7 53.937 2
 -3 9 5 46.177 59.611 5
 3 -9 -5 -48.498 69.755 1
 3 -9 -5 -82.662 74.738 1
 3 -9 -5 -38.642 50.538 4
 -3 9 4 44.001 73.182 1
 -3 9 4 75.61 71.564 1
 -3 9 4 -67.945 56.106 2
 -3 9 4 7.209 57.811 5
 3 -9 -4 -46.944 66.155 1
 3 -9 -4 55.988 73.375 1
 3 -9 -4 11.687 48.988 4
 -3 9 3 160.983 72.63 1
 -3 9 3 104.851 73.029 1
 -3 9 3 196.202 58.803 2
 -3 9 3 102.935 59.631 5
 3 -9 -3 279.803 79.95 1
 3 -9 -3 26.035 76.789 1
 3 -9 -3 215.453 40.622 3
 3 -9 -3 196.333 51.214 4
 -3 9 2 820.468 88.07 1
 -3 9 2 933.347 89.94 1
 -3 9 2 1151.3 102.6 2
 -3 9 2 868.103 78.404 5
 3 -9 -2 1550.3 150.2 1
 3 -9 -2 1505.7 147 1
 3 -9 -2 1047.2 63.9 3
 3 -9 -2 1164 88.3 4
 -3 9 1 -123.275 60.312 1
 -3 9 1 -45.263 67.028 1
 -3 9 1 -8.5 55.89 2
 -3 9 1 -73.961 55.21 5
 3 -9 -1 -74.585 73.373 1
 3 -9 -1 -175.589 68.214 1
 3 -9 -1 45.348 40.877 3
 3 -9 -1 53.403 41.618 4
 -3 9 0 -69.275 70.223 1
 -3 9 0 -44.536 68.841 1
 -3 9 0 70.57 61.572 2
 -3 9 0 74.902 54.421 5
 3 -9 0 -85.115 125.24 1
 3 -9 0 -45.579 68.874 1
 3 -9 0 19.806 43.447 3
 3 -9 0 29.806 41.103 4
 -3 9 -1 569.158 97.289 1
 -3 9 -1 640.081 89.113 1
 -3 9 -1 660.097 73.289 2
 -3 9 -1 539.602 70.085 5
 3 -9 1 465.988 89.135 1
 3 -9 1 519.261 77.986 1
 3 -9 1 699.113 74.993 3
 3 -9 1 699.26 76.126 4
 -3 9 -2 1827.9 168.3 1
 -3 9 -2 1589.3 146.6 1
 -3 9 -2 2441.2 128.7 2
 -3 9 -2 1851.5 130.6 5
 3 -9 2 2191.7 145.5 1
 3 -9 2 1891.1 143.5 1
 3 -9 2 1849.1 87.7 3
 3 -9 2 2086.9 86.1 4
 -3 9 -3 5191.9 164 1
 -3 9 -3 5137.9 166.4 1
 -3 9 -3 5206.6 160.8 5
 3 -9 3 5055.8 162.4 1
 3 -9 3 4953.5 166.4 1
 3 -9 3 4504.4 115 3
 3 -9 3 4982.9 103.9 4
 -3 9 -4 -88.578 66.892 1
 -3 9 -4 -15.165 67.92 1
 -3 9 -4 53.573 59.928 5
 3 -9 4 -96.779 65.941 1
 3 -9 4 -40.77 68.633 1
 3 -9 4 70.654 58.136 3
 -3 9 -5 36.367 71.628 1
 -3 9 -5 -55.892 71.499 1
 -3 9 -5 115.482 61.038 5
 3 -9 5 31.093 62.742 1
 3 -9 5 8.926 65.844 1
 3 -9 5 110.316 63.002 3
 3 -9 5 121.275 60.689 5
 -3 9 -6 7909.9 189.1 1
 -3 9 -6 7258.7 181.4 1
 -3 9 -6 6957.7 112.9 4
 -3 9 -6 7707.5 181.4 5
 3 -9 6 7528.6 177 1
 3 -9 6 7659.3 188.9 1
 3 -9 6 7178.3 156.5 3
 3 -9 6 7346.8 179 5
 -3 9 -7 91.046 73.335 1
 -3 9 -7 112.756 69.276 1
 -3 9 -7 66.165 42.142 4
 -3 9 -7 89.072 61.764 5
 3 -9 7 4.633 61.728 1
 3 -9 7 15.309 69.113 1
 3 -9 7 132.231 67.951 3
 3 -9 7 7.431 59.454 5
 -3 9 -8 1188.6 139.9 1
 -3 9 -8 1543.5 136 1
 -3 9 -8 1145.2 85.7 4
 -3 9 -8 1294.7 132.3 5
 3 -9 8 1446 128.2 1
 3 -9 8 1219.3 140.9 1
 3 -9 8 1350.8 118.6 3
 3 -9 8 1515.7 139.2 5
 -3 9 -9 7254 184.8 1
 -3 9 -9 6619.8 173.2 1
 -3 9 -9 6148 120.6 4
 -3 9 -9 6542 185 5
 3 -9 9 6257.6 170.9 1
 3 -9 9 6439.3 171.2 1
 3 -9 9 6141.7 163.7 3
 3 -9 9 6533 187.9 5
 -3 9 -10 576.58 80.327 1
 -3 9 -10 395.075 75.027 1
 -3 9 -10 539.669 57.824 4
 -3 9 -10 478.764 80.166 5
 3 -9 10 539.649 78.701 1
 3 -9 10 478.617 79.067 1
 3 -9 10 472.995 83.966 3
 3 -9 10 448.61 73.592 5
 -3 9 -11 1068.9 92.8 1
 -3 9 -11 1169.1 130.3 1
 -3 9 -11 1050.6 98.1 4
 -3 9 -11 927.558 94.122 5
 3 -9 11 1222 132.1 1
 3 -9 11 921.98 91.851 1
 3 -9 11 1152.3 124 3
 3 -9 11 1271.6 146.9 5
 -3 9 -12 47.016 71.826 1
 -3 9 -12 43.39 67.999 1
 -3 9 -12 150.344 54.309 4
 -3 9 -12 -66.424 71.745 5
 3 -9 12 326.267 75.508 1
 3 -9 12 160.563 71.235 1
 3 -9 12 126.075 76.029 3
 3 -9 12 102.961 76.219 5
 -3 9 -13 6.803 77.096 1
 -3 9 -13 80.192 73.06 1
 -3 9 -13 77.558 89.338 4
 -3 9 -13 -4.06 80.18 5
 3 -9 13 129.371 74.062 1
 3 -9 13 162.36 81.118 1
 3 -9 13 -21.394 71.446 5
 -3 9 -14 79.365 77.906 1
 -3 9 -14 200.648 61.572 4
 -3 9 -14 155.266 82.768 5
 3 -9 14 218.47 84.024 1
 3 -9 14 70.6 83.145 1
 3 -9 14 182.669 81.214 3
 3 -9 14 88.122 83.094 5
 -3 8 12 264.426 104.042 1
 -3 8 12 69.677 103.206 1
 -3 8 12 -28.213 108.299 5
 3 -8 -12 207.01 106.783 1
 3 -8 -12 -222.669 106.398 1
 3 -8 -12 45.091 75.98 4
 -3 8 11 362.6 103.833 1
 -3 8 11 205.423 99.989 1
 -3 8 11 252.586 110.242 5
 3 -8 -11 168.648 101.043 1
 3 -8 -11 34.219 92.472 1
 3 -8 -11 116.325 73.874 4
 -3 8 10 161.871 88.421 1
 -3 8 10 -66.125 94.091 1
 -3 8 10 133.735 62.726 5
 3 -8 -10 254.43 106.53 1
 3 -8 -10 17.975 86.796 1
 3 -8 -10 69.917 61.902 4
 -3 8 9 724.829 98.866 1
 -3 8 9 755.372 102.189 1
 -3 8 9 894.249 111.001 5
 3 -8 -9 784.687 105.493 1
 3 -8 -9 672.81 97.274 1
 3 -8 -9 608.958 68.772 4
 -3 8 8 476.277 81.456 1
 -3 8 8 461.149 86.311 1
 -3 8 8 418.015 63.387 5
 3 -8 -8 462.231 93.818 1
 3 -8 -8 591.63 84.081 1
 3 -8 -8 370.414 59.663 4
 -3 8 7 -141.629 67 1
 -3 8 7 49.065 77.414 1
 -3 8 7 -49.732 53.34 5
 3 -8 -7 15.515 80.446 1
 3 -8 -7 73.993 73.289 1
 3 -8 -7 -104.926 49.525 4
 -3 8 6 70.34 67.042 1
 -3 8 6 -23.857 71.311 1
 -3 8 6 117.557 54.981 2
 -3 8 6 105.215 55.872 5
 3 -8 -6 93.59 80.42 1
 3 -8 -6 207.103 69.455 1
 3 -8 -6 115.448 51.694 4
 -3 8 5 427.024 80.136 1
 -3 8 5 315.715 74.557 1
 -3 8 5 198.809 53.793 2
 -3 8 5 235.424 57.702 5
 3 -8 -5 180.659 69.001 1
 3 -8 -5 203.365 70.481 1
 3 -8 -5 287.172 50.578 4
 -3 8 4 9.749 65.85 1
 -3 8 4 73.595 65.496 1
 -3 8 4 5.938 51.116 2
 -3 8 4 -22.933 52.135 5
 3 -8 -4 -151.851 106.393 1
 3 -8 -4 33.196 64.034 1
 3 -8 -4 75.821 31.61 3
 3 -8 -4 19.38 40.619 4
 -3 8 3 155.971 112.325 1
 -3 8 3 195.264 63.47 1
 -3 8 3 139.962 52.248 2
 -3 8 3 123.085 53.177 5
 3 -8 -3 151.895 65.026 1
 3 -8 -3 252.661 68.787 1
 3 -8 -3 156.235 35.825 3
 3 -8 -3 88.838 40.738 4
 -3 8 2 194.466 60.891 1
 -3 8 2 218.363 62.001 1
 -3 8 2 233.583 56.625 2
 -3 8 2 233.959 56.338 5
 3 -8 -2 253.588 68.718 1
 3 -8 -2 109.141 65.081 1
 3 -8 -2 151.241 38.703 3
 3 -8 -2 257.698 41.923 4
 -3 8 1 23.561 54.792 1
 -3 8 1 -45.244 55.983 1
 -3 8 1 33.016 53.818 2
 -3 8 1 -34.655 50.408 5
 3 -8 -1 -42.145 59.892 1
 3 -8 -1 -36.163 53.303 1
 3 -8 -1 23.461 38.353 3
 3 -8 -1 13.004 35.498 4
 -3 8 0 251.63 63.594 1
 -3 8 0 189.188 65.389 1
 -3 8 0 234.534 61.467 2
 -3 8 0 284.96 88.911 5
 3 -8 0 257.013 65.984 1
 3 -8 0 166.777 62.598 1
 3 -8 0 254.472 46.098 3
 3 -8 0 161.587 37.938 4
 -3 8 -1 470.039 72.624 1
 -3 8 -1 474.617 69.941 1
 -3 8 -1 800.215 96.874 2
 -3 8 -1 390.582 88.52 5
 3 -8 1 458.722 68.363 1
 3 -8 1 525.878 69.741 1
 3 -8 1 690.604 68.953 3
 3 -8 1 663.2 62.745 4
 -3 8 -2 -115.435 56.154 1
 -3 8 -2 -37.374 58.972 1
 -3 8 -2 45.438 50.722 5
 3 -8 2 -76.332 58.016 1
 3 -8 2 -78.957 54.52 1
 3 -8 2 -8.047 45.14 3
 3 -8 2 74.689 32.921 4
 -3 8 -3 904.464 83.371 1
 -3 8 -3 865.354 82.911 1
 -3 8 -3 636.178 45.574 4
 -3 8 -3 1136.4 110 5
 3 -8 3 988.198 115.416 1
 3 -8 3 778.56 78.259 1
 3 -8 3 953.905 78.905 3
 3 -8 3 1152.2 68.6 4
 -3 8 -4 12011.6 189 1
 -3 8 -4 11938.6 188.4 1
 -3 8 -4 11208.4 115 4
 -3 8 -4 12269.7 191.9 5
 3 -8 4 11841 187.9 1
 3 -8 4 12550.3 191 1
 3 -8 4 11167.4 157.5 3
 3 -8 4 11994.6 191.7 5
 -3 8 -5 12341.7 192.9 1
 -3 8 -5 11934.9 188.7 1
 -3 8 -5 11040.2 117.4 4
 -3 8 -5 11657.2 192 5
 3 -8 5 11771.2 185.2 1
 3 -8 5 11635.7 183.9 1
 3 -8 5 11361.3 168.6 3
 3 -8 5 11907.7 190.8 5
 -3 8 -6 9.986 60.163 1
 -3 8 -6 73.098 63.425 1
 -3 8 -6 46.121 51.565 5
 3 -8 6 -20.104 52.856 1
 3 -8 6 -49.253 58.868 1
 3 -8 6 122.423 57.337 3
 3 -8 6 -5.754 55.184 5
 -3 8 -7 340.78 69.19 1
 -3 8 -7 467.769 73.396 1
 -3 8 -7 336.677 43.277 4
 -3 8 -7 458.935 65.681 5
 3 -8 7 441.05 70.839 1
 3 -8 7 300.758 68.845 1
 3 -8 7 492.992 69.867 3
 3 -8 7 489.741 68.343 5
 -3 8 -8 237.795 68.223 1
 -3 8 -8 341.085 69.105 1
 -3 8 -8 395.758 44.587 4
 -3 8 -8 366.352 66.487 5
 3 -8 8 396.749 69.279 1
 3 -8 8 397.995 68.868 1
 3 -8 8 464.203 72.887 3
 3 -8 8 375.819 65.736 5
 -3 8 -9 -90.071 59.337 1
 -3 8 -9 -71.036 54.718 1
 -3 8 -9 -43.99 38.132 4
 -3 8 -9 9.788 55.563 5
 3 -8 9 -126.24 52.487 1
 3 -8 9 18.543 58.982 1
 3 -8 9 38.211 62.758 3
 3 -8 9 32.703 57.792 5
 -3 8 -10 12.838 61.531 1
 -3 8 -10 4.495 60.575 1
 -3 8 -10 12.041 42.504 4
 -3 8 -10 81.193 59.488 5
 3 -8 10 66.194 56.35 1
 3 -8 10 126.228 59.28 1
 3 -8 10 59.048 66.238 3
 3 -8 10 1.161 57.369 5
 -3 8 -11 988.609 117.529 1
 -3 8 -11 1017.4 111.6 1
 -3 8 -11 792.271 88.91 4
 -3 8 -11 1091.6 127.1 5
 3 -8 11 1063.3 117.3 1
 3 -8 11 898.403 80.032 1
 3 -8 11 1051.9 116.8 3
 3 -8 11 1185.3 122.6 5
 -3 8 -12 100.78 61.492 1
 -3 8 -12 12.97 59.369 1
 -3 8 -12 -7.897 47.918 4
 -3 8 -12 17.834 62.87 5
 3 -8 12 82.306 62.339 1
 3 -8 12 -17.379 61.665 1
 3 -8 12 75.313 70.757 3
 3 -8 12 27.814 59.051 5
 -3 8 -13 429.674 75.71 1
 -3 8 -13 539.216 77.245 1
 -3 8 -13 451.117 60.309 4
 -3 8 -13 349.416 75.45 5
 3 -8 13 454.988 69.707 1
 3 -8 13 226.036 65.839 1
 3 -8 13 394.211 79.199 3
 3 -8 13 260.299 69.578 5
 -3 8 -14 280.68 73.076 1
 -3 8 -14 459.095 104.028 4
 -3 8 -14 424.842 86.352 5
 3 -8 14 509.598 72.983 1
 3 -8 14 368.17 78.473 1
 3 -8 14 375.713 81.529 3
 3 -8 14 349.451 72.954 5
 -3 8 -15 1567.8 138.7 1
 -3 8 -15 1059.5 90.1 1
 -3 8 -15 936.369 112.932 4
 -3 8 -15 1008.8 100.4 5
 3 -8 15 1051.5 120.6 1
 3 -8 15 1127.7 140.7 1
 3 -8 15 1012.6 94.8 5
 -3 8 -16 229.656 76.722 1
 -3 8 -16 198.634 71.8 1
 -3 8 -16 145.895 64.016 4
 -3 8 -16 -59.017 71.737 5
 3 -8 16 43.596 70.185 1
 3 -8 16 21.438 80.093 1
 3 -8 16 142.785 76.604 3
 3 -8 16 127.425 82.927 5
 -3 7 14 118.236 101.285 1
 -3 7 14 578.771 124.282 1
 -3 7 14 417.062 119.532 5
 3 -7 -14 257.24 108.566 1
 3 -7 -14 380.616 113.053 1
 3 -7 -14 353.848 83.199 4
 -3 7 13 49.887 91.133 1
 -3 7 13 166.024 107.976 1
 -3 7 13 185.249 60.386 5
 3 -7 -13 224.733 110.181 1
 3 -7 -13 207.888 99.644 1
 3 -7 -13 68.012 74.124 4
 -3 7 12 167.648 90.488 1
 -3 7 12 188.155 95.733 1
 -3 7 12 202.515 61.747 5
 3 -7 -12 297.354 99.204 1
 3 -7 -12 438.67 100.301 1
 3 -7 -12 103.533 67.56 4
 -3 7 11 177.402 85.608 1
 -3 7 11 340.983 97.599 1
 -3 7 11 162.111 58.389 5
 3 -7 -11 357.61 101.263 1
 3 -7 -11 234.422 80.731 1
 3 -7 -11 208.515 105.959 4
 -3 7 10 46.679 74.443 1
 -3 7 10 99.429 78.46 1
 -3 7 10 27.906 52.741 5
 3 -7 -10 -163.781 80.289 1
 3 -7 -10 3.837 72.577 1
 3 -7 -10 65.082 56.528 4
 -3 7 9 170.104 74.727 1
 -3 7 9 213.114 82.109 1
 -3 7 9 133.506 53.537 5
 3 -7 -9 234.607 78.977 1
 3 -7 -9 186.54 78.096 1
 3 -7 -9 180.495 54.069 4
 -3 7 8 285.94 72.646 1
 -3 7 8 182.087 70.728 1
 -3 7 8 52.124 51.509 5
 3 -7 -8 206.777 77.318 1
 3 -7 -8 146.954 76.643 1
 3 -7 -8 54 49.187 4
 -3 7 7 522.382 76.623 1
 -3 7 7 425.223 77.565 1
 -3 7 7 355.006 56.23 2
 -3 7 7 263.996 57.821 5
 3 -7 -7 372.427 115.82 1
 3 -7 -7 274.562 73.115 1
 3 -7 -7 184.164 48.421 4
 -3 7 6 101.345 56.465 1
 -3 7 6 57.688 51.373 2
 -3 7 6 38.19 49.614 5
 3 -7 -6 72.588 67.98 1
 3 -7 -6 73.645 66.727 1
 3 -7 -6 6.3 43.856 4
 -3 7 5 1211.4 116.1 1
 -3 7 5 1140.1 117.6 1
 -3 7 5 754.59 64.615 2
 -3 7 5 678.286 62.971 5
 3 -7 -5 1151.8 119.2 1
 3 -7 -5 1099.9 120.6 1
 3 -7 -5 657.502 74.713 4
 -3 7 4 356.382 65.525 1
 -3 7 4 436.376 87.275 1
 -3 7 4 254.856 54.427 2
 -3 7 4 227.69 52.552 5
 3 -7 -4 301.845 58.305 1
 3 -7 -4 364.409 63.481 1
 3 -7 -4 371.704 33.956 3
 3 -7 -4 222.319 41.593 4
 -3 7 3 427.322 63.061 1
 -3 7 3 535.469 78.068 1
 -3 7 3 410.092 55.945 2
 -3 7 3 425.731 55.357 5
 3 -7 -3 442.541 63.397 1
 3 -7 -3 428.556 60.925 1
 3 -7 -3 494.952 47.661 3
 3 -7 -3 461.566 43.887 4
 -3 7 2 -86.535 50.479 1
 -3 7 2 28.576 50.028 1
 -3 7 2 -126.906 43.085 2
 -3 7 2 -112.508 40.639 5
 3 -7 -2 14.365 54.717 1
 3 -7 -2 6.243 58.526 1
 3 -7 -2 -0.382 33.75 3
 3 -7 -2 -58.3 31.112 4
 -3 7 1 48.159 52.114 1
 -3 7 1 12.904 49.275 1
 -3 7 1 -47.842 44.664 2
 -3 7 1 -16.619 44.602 5
 3 -7 -1 15.055 52.224 1
 3 -7 -1 -23.676 88.888 1
 3 -7 -1 -11.098 32.873 3
 3 -7 -1 -26.259 29.202 4
 -3 7 0 450.554 55.707 1
 -3 7 0 576.686 63.171 1
 -3 7 0 637.577 61.991 2
 -3 7 0 546.677 56.573 5
 3 -7 0 465.968 58.51 1
 3 -7 0 494.916 86.296 1
 3 -7 0 605.888 60.137 3
 3 -7 0 544.133 53.335 4
 -3 7 -1 1668.5 99.4 1
 -3 7 -1 1686.7 104.3 1
 -3 7 -1 1819.6 95.2 2
 -3 7 -1 1544.4 101.8 5
 3 -7 1 1552.7 102.2 1
 3 -7 1 1785 122.8 1
 3 -7 1 1497.2 71.7 3
 3 -7 1 1648.7 57.7 4
 -3 7 -2 165.388 55.738 1
 -3 7 -2 188.488 54.235 1
 -3 7 -2 164.746 48.588 5
 3 -7 2 240.02 55.75 1
 3 -7 2 176.821 63.52 1
 3 -7 2 151.578 44.252 3
 3 -7 2 223.892 30.642 4
 -3 7 -3 6064.7 138.2 1
 -3 7 -3 6183.7 136.1 1
 -3 7 -3 5690 74.8 4
 -3 7 -3 5946 136.9 5
 3 -7 3 5897.6 134.5 1
 3 -7 3 5582.7 157.5 1
 3 -7 3 5421.2 108.3 3
 -3 7 -4 7647.2 144.2 1
 -3 7 -4 7561.8 146.3 1
 -3 7 -4 7048 83 4
 -3 7 -4 7031.2 146.4 5
 3 -7 4 7331.5 142.8 1
 3 -7 4 6224.8 209.5 1
 3 -7 4 6624.7 122.8 3
 3 -7 4 7390 148.7 5
 -3 7 -5 338.369 58.475 1
 -3 7 -5 324.38 60.45 1
 -3 7 -5 192.944 32.775 4
 -3 7 -5 220.544 54.463 5
 3 -7 5 305.589 59.121 1
 3 -7 5 281.991 92.486 1
 3 -7 5 268.954 55.261 3
 3 -7 5 221.91 103.217 5
 -3 7 -6 5866.1 133.6 1
 -3 7 -6 5642.4 138.2 1
 -3 7 -6 5224.7 82.7 4
 -3 7 -6 4219.4 205.6 5
 3 -7 6 5447.3 125.8 1
 3 -7 6 5782.8 139.7 1
 3 -7 6 5245.3 122.3 3
 3 -7 6 5339.9 142.9 5
 -3 7 -7 -40.265 49.445 1
 -3 7 -7 -54.127 47.519 5
 3 -7 7 -70.978 42.82 1
 3 -7 7 18.22 50.889 1
 3 -7 7 30.245 51.19 3
 3 -7 7 -7.783 46.369 5
 -3 7 -8 235.908 57.061 1
 -3 7 -8 157.857 50.69 1
 -3 7 -8 134.444 34.233 4
 -3 7 -8 233.253 53.276 5
 3 -7 8 133.117 52.299 1
 3 -7 8 116.244 51.619 1
 3 -7 8 211.13 61.727 3
 3 -7 8 149.913 53.542 5
 -3 7 -9 39.584 50.716 1
 -3 7 -9 14.743 47.247 1
 -3 7 -9 47.943 34.041 4
 -3 7 -9 82.622 47.988 5
 3 -7 9 97.827 51.552 1
 3 -7 9 29.78 50.419 1
 3 -7 9 65.267 60.364 3
 3 -7 9 139.828 52.929 5
 -3 7 -10 3046.6 115.4 1
 -3 7 -10 3102.4 113.9 1
 -3 7 -10 2966.5 89.7 4
 -3 7 -10 3103.7 129.8 5
 3 -7 10 3059.2 113.1 1
 3 -7 10 2764.6 110.9 1
 3 -7 10 3061.4 122.2 3
 3 -7 10 2921 126.4 5
 -3 7 -11 2524.6 114.9 1
 -3 7 -11 2619.1 115 1
 -3 7 -11 2285.2 90.3 4
 -3 7 -11 2848.5 133.2 5
 3 -7 11 2656.6 109 1
 3 -7 11 2354.4 109.8 1
 3 -7 11 2488.9 120.4 3
 3 -7 11 2594.6 127.7 5
 -3 7 -12 -28.347 52.425 1
 -3 7 -12 37.402 52.482 1
 -3 7 -12 5.901 42.691 4
 -3 7 -12 -46.575 57.94 5
 3 -7 12 53.541 51.961 1
 3 -7 12 54.107 51.989 1
 3 -7 12 54.481 66.8 3
 3 -7 12 15.092 50.22 5
 -3 7 -13 267.671 62.785 1
 -3 7 -13 208.33 52.677 4
 -3 7 -13 225.797 66.519 5
 3 -7 13 248.851 58.14 1
 3 -7 13 197.204 61.031 1
 3 -7 13 131.025 68.818 3
 3 -7 13 132.579 58.683 5
 -3 7 -14 28.488 56.507 1
 -3 7 -14 123.753 57.333 1
 -3 7 -14 95.496 51.318 4
 -3 7 -14 105.802 65.232 5
 3 -7 14 154.282 57.226 1
 3 -7 14 97.014 61.102 1
 3 -7 14 24.91 59.728 3
 3 -7 14 107.463 60.742 5
 -3 7 -15 -100.171 59.985 1
 -3 7 -15 111.046 58.494 1
 -3 7 -15 58.069 56.891 4
 -3 7 -15 -140.057 65.069 5
 3 -7 15 32.83 60.328 1
 3 -7 15 35.466 63.295 1
 3 -7 15 53.709 64.24 3
 3 -7 15 -13.253 62.569 5
 -3 7 -16 797.167 83.428 1
 -3 7 -16 673.523 77.237 1
 -3 7 -16 735.044 76.459 4
 -3 7 -16 549.421 83.944 5
 3 -7 16 874.534 109.075 1
 3 -7 16 752.648 82.325 1
 3 -7 16 714.55 86.228 5
 -3 7 -17 219.062 73.974 1
 -3 7 -17 208.306 73.736 1
 -3 7 -17 221.966 72.072 4
 -3 7 -17 94.696 71.511 5
 3 -7 17 281.501 69.673 1
 3 -7 17 267.027 77.5 1
 3 -7 17 201.282 72.562 3
 3 -7 17 102.514 73.479 5
 -3 6 16 283.365 106.853 1
 -3 6 16 217.944 126.324 1
 3 -6 -16 -124.267 114.972 1
 3 -6 -16 -156.307 107.375 1
 -3 6 15 340.423 99.017 1
 -3 6 15 -115.637 104.447 1
 3 -6 -15 173.164 104.753 1
 3 -6 -15 146.965 112.974 1
 -3 6 14 186.203 87.473 1
 -3 6 14 88.719 93.864 1
 3 -6 -14 -12.534 87.576 1
 3 -6 -14 -49.837 94.649 1
 -3 6 13 106.9 85.581 1
 -3 6 13 -51.536 87.586 1
 3 -6 -13 82.254 97.815 1
 3 -6 -13 -24.099 83.643 1
 -3 6 12 2575.9 160.9 1
 -3 6 12 2583.2 170.3 1
 3 -6 -12 2546.7 170.5 1
 3 -6 -12 2671.2 170.2 1
 -3 6 11 66.96 73.286 1
 -3 6 11 105.476 76.868 1
 3 -6 -11 -13.353 78.407 1
 3 -6 -11 126.276 78.283 1
 -3 6 10 318.758 80.593 1
 -3 6 10 160.081 76.083 1
 -3 6 10 266.27 55.245 5
 3 -6 -10 211.71 82.967 1
 3 -6 -10 310.317 82.3 1
 3 -6 -10 130.9 52.624 4
 -3 6 9 3927.6 154.3 1
 -3 6 9 3732.6 157.5 1
 -3 6 9 3503.1 123.7 5
 3 -6 -9 3759.2 154.4 1
 3 -6 -9 3451.2 113.7 4
 -3 6 8 10837.2 222 1
 -3 6 8 9489.7 292.4 1
 -3 6 8 10727.1 163.5 5
 3 -6 -8 11716.7 200 1
 3 -6 -8 11513.2 198.4 1
 3 -6 -8 10478.3 145.4 4
 -3 6 7 10011.3 181.3 1
 -3 6 7 9759.3 178.1 1
 -3 6 7 9232.5 127.9 2
 -3 6 7 9019.7 150.8 5
 3 -6 -7 10022.3 183.7 1
 3 -6 -7 8987.7 205.9 1
 3 -6 -7 8986 129.8 4
 -3 6 6 399.022 62.554 1
 -3 6 6 449.856 70.519 1
 -3 6 6 390.7 54.774 2
 -3 6 6 292.61 53.467 5
 3 -6 -6 535.324 72.363 1
 3 -6 -6 461.779 73.292 1
 3 -6 -6 402.137 45.094 4
 -3 6 5 20994.5 220.5 1
 -3 6 5 20772.6 220.6 1
 -3 6 5 19798.6 167.5 2
 -3 6 5 19468.9 195.2 5
 3 -6 -5 20311 217.7 1
 3 -6 -5 20819.4 222.4 1
 3 -6 -5 19437 151 4
 -3 6 4 9630.1 157.7 1
 -3 6 4 9719.9 159.7 1
 -3 6 4 8806.8 124.6 2
 -3 6 4 9255 146.1 5
 3 -6 -4 9261 156.8 1
 3 -6 -4 9608.1 161.5 1
 3 -6 -4 8320.5 80 3
 3 -6 -4 8863.6 104.3 4
 -3 6 3 221.855 51.548 1
 -3 6 3 100.149 47.395 1
 -3 6 3 189.544 46.228 2
 -3 6 3 43.655 41.908 5
 3 -6 -3 186.047 50.017 1
 3 -6 -3 107.251 47.735 1
 3 -6 -3 116.293 31.308 3
 3 -6 -3 65.625 30.389 4
 -3 6 2 73.256 46.191 1
 -3 6 2 129.421 46.47 1
 -3 6 2 23.982 43.849 2
 -3 6 2 51.667 39.802 5
 3 -6 -2 79.21 48.713 1
 3 -6 -2 115.991 47.373 1
 3 -6 -2 111.135 31.222 3
 3 -6 -2 67.373 26.707 4
 -3 6 1 39.452 41.694 1
 -3 6 1 -6.505 42.23 1
 -3 6 1 30.872 39.956 2
 -3 6 1 3.7 36.942 5
 3 -6 -1 27.602 41.971 1
 3 -6 -1 30.735 41.903 1
 3 -6 -1 24.026 31.791 3
 3 -6 -1 -34.404 22.089 4
 -3 6 0 385.299 50.149 1
 -3 6 0 318.351 51.075 1
 -3 6 0 342.542 48.294 2
 -3 6 0 212.617 41.257 5
 3 -6 0 308.112 49.703 1
 3 -6 0 314.277 47.05 1
 3 -6 0 313.987 40.765 3
 3 -6 0 291.738 25.729 4
 -3 6 -1 106.478 43.225 1
 -3 6 -1 117.102 46.382 1
 -3 6 -1 80.708 46.007 2
 -3 6 -1 100.237 39.962 5
 3 -6 1 140.492 45.534 1
 3 -6 1 102.193 42.984 1
 3 -6 1 138.286 38.623 3
 3 -6 1 110.305 22.122 4
 -3 6 -2 -9.717 40.267 1
 -3 6 -2 85.324 42.687 1
 -3 6 -2 4.518 37.181 5
 3 -6 2 54.998 40.834 1
 3 -6 2 35.625 40.587 1
 3 -6 2 63.949 38.288 3
 -3 6 -3 1446.8 83.1 1
 -3 6 -3 1353.5 82.5 1
 -3 6 -3 1290.5 39.8 4
 -3 6 -3 1412.2 89.2 5
 3 -6 3 1461.4 83.1 1
 3 -6 3 1448.8 84.1 1
 3 -6 3 1279 69 3
 -3 6 -4 1522.3 86.7 1
 -3 6 -4 1551.1 89.1 1
 -3 6 -4 1621.7 45.4 4
 -3 6 -4 1496 93 5
 3 -6 4 1470 82.2 1
 3 -6 4 1569.7 86.7 1
 3 -6 4 1456.9 73.9 3
 3 -6 4 1719.7 92.4 5
 -3 6 -5 17363.6 172.7 1
 -3 6 -5 17207.7 170.7 1
 -3 6 -5 16127.7 104.2 4
 -3 6 -5 16147.3 187 5
 3 -6 5 16227.2 163.6 1
 3 -6 5 16595.8 167.4 1
 3 -6 5 15060.5 165 3
 3 -6 5 16696.7 188.1 5
 -3 6 -6 8148.1 130.4 1
 -3 6 -6 7924.6 128 1
 -3 6 -6 7219.8 83.1 4
 -3 6 -6 7370.5 142.1 5
 3 -6 6 7581 122.4 1
 3 -6 6 7866.7 128.6 1
 3 -6 6 7167.2 127.3 3
 3 -6 6 7674.4 142.1 5
 -3 6 -7 2386.2 95.4 1
 -3 6 -7 2221 88.8 1
 -3 6 -7 2130.2 64.5 4
 -3 6 -7 2185.5 104 5
 3 -6 7 2151.1 90.7 1
 3 -6 7 2260.5 93.5 1
 3 -6 7 2070.6 92.4 3
 3 -6 7 2098.7 100.4 5
 -3 6 -8 35.93 43.879 1
 -3 6 -8 -10.416 41.152 1
 -3 6 -8 -23.243 29.105 4
 -3 6 -8 9.462 42.895 5
 3 -6 8 35.393 42.839 1
 3 -6 8 -9.48 43.761 1
 3 -6 8 31.02 44.732 3
 3 -6 8 2.562 42.511 5
 -3 6 -9 2182.5 90.6 1
 -3 6 -9 2261.6 91.6 1
 -3 6 -9 2127.1 74.1 4
 -3 6 -9 1988.2 128.7 5
 3 -6 9 2149.9 88.4 1
 3 -6 9 2121.3 91.3 1
 3 -6 9 2111.5 98.5 3
 3 -6 9 2320.7 138.2 5
 -3 6 -10 1956.7 94 1
 -3 6 -10 2143.5 95.4 1
 -3 6 -10 1805.3 77.9 4
 -3 6 -10 1794.7 109.8 5
 3 -6 10 1898.2 88.4 1
 3 -6 10 1617.1 138.6 1
 3 -6 10 1709.8 98 3
 3 -6 10 2064.5 108.4 5
 -3 6 -11 147.827 50.811 1
 -3 6 -11 129.324 42.717 4
 -3 6 -11 144.697 52.388 5
 3 -6 11 154.307 46.848 1
 3 -6 11 161.657 47.259 1
 3 -6 11 151.725 53.541 3
 3 -6 11 182.032 51.427 5
 -3 6 -12 809.069 91.066 1
 -3 6 -12 630.675 56.951 4
 -3 6 -12 592.983 66.002 5
 3 -6 12 574.471 58.15 1
 3 -6 12 753.275 92.111 1
 3 -6 12 708.394 79.645 3
 3 -6 12 669.921 66.668 5
 -3 6 -13 909.588 96.036 1
 -3 6 -13 1151 89.4 1
 -3 6 -13 870.335 87.814 4
 -3 6 -13 1064.1 116.1 5
 3 -6 13 1011.3 88.8 1
 3 -6 13 1074.3 94.6 1
 3 -6 13 863.374 96.397 3
 3 -6 13 955.936 109.855 5
 -3 6 -14 77.08 53.458 1
 -3 6 -14 88.321 50.672 1
 -3 6 -14 -54.444 46.726 4
 -3 6 -14 5.361 53.255 5
 3 -6 14 130.279 50.524 1
 3 -6 14 23.068 53.739 1
 3 -6 14 -69.037 58.99 3
 3 -6 14 -15.31 51.494 5
 -3 6 -15 112.501 55.818 1
 -3 6 -15 105.99 55.963 1
 -3 6 -15 124.647 66.679 4
 -3 6 -15 160.798 64.281 5
 3 -6 15 281.032 55.381 1
 3 -6 15 147.938 61.687 1
 3 -6 15 114.933 63.537 3
 3 -6 15 110.771 56.49 5
 -3 6 -16 87.429 58.195 1
 -3 6 -16 129.681 57.66 1
 -3 6 -16 37.531 56.632 4
 -3 6 -16 -75.439 56.222 5
 3 -6 16 78.057 55.539 1
 3 -6 16 -37.393 57.337 1
 3 -6 16 64.889 62.303 3
 3 -6 16 16.215 62.111 5
 -3 6 -17 128.566 60.638 1
 -3 6 -17 110.77 63.872 1
 -3 6 -17 -133.479 60.154 4
 -3 6 -17 -10.095 62.188 5
 3 -6 17 -8.634 55.787 1
 3 -6 17 22.088 63.727 1
 3 -6 17 -15.737 63.533 3
 3 -6 17 24.033 65.835 5
 -3 6 -18 626.749 78.793 1
 -3 6 -18 506.884 79.568 1
 -3 6 -18 439.425 76.182 4
 -3 6 -18 549.7 85.206 5
 3 -6 18 583.046 75.052 1
 3 -6 18 694.812 80.721 1
 3 -6 18 544.862 96.644 3
 3 -6 18 586.224 83.418 5
 -3 5 17 58.775 99.487 1
 -3 5 17 -125.068 102.301 1
 3 -5 -17 -203.511 103.172 1
 3 -5 -17 -20.195 114.207 1
 3 -5 -17 47.772 68.565 2
 -3 5 16 7.321 88.658 1
 -3 5 16 253.828 108.212 1
 3 -5 -16 -69.543 96.369 1
 3 -5 -16 116.516 103.989 1
 3 -5 -16 126.444 64.06 2
 -3 5 15 100.047 82.017 1
 -3 5 15 71.44 86.62 1
 3 -5 -15 -34.159 87.14 1
 3 -5 -15 -69.886 91.746 1
 3 -5 -15 -71.394 58.927 2
 -3 5 14 195.035 80.668 1
 -3 5 14 -40.334 87.297 1
 3 -5 -14 155.203 90.513 1
 3 -5 -14 65.57 91.035 1
 3 -5 -14 270.173 61.026 2
 -3 5 13 94.039 69.689 1
 -3 5 13 -84.161 80.93 1
 3 -5 -13 54.265 71.669 1
 3 -5 -13 66.688 77.325 1
 3 -5 -13 170.817 56.949 2
 -3 5 12 -4.124 70.885 1
 -3 5 12 4.108 73.852 1
 3 -5 -12 -76.356 74.058 1
 3 -5 -12 -2.927 70.444 1
 3 -5 -12 52.921 52.421 2
 -3 5 11 5472.4 162.9 1
 -3 5 11 5470.8 178.9 1
 3 -5 -11 5404 182.2 1
 3 -5 -11 5823.4 174.5 1
 3 -5 -11 5673.6 118.3 2
 -3 5 10 1435.1 136.8 1
 3 -5 -10 1447.8 137.8 1
 3 -5 -10 1020.2 92.2 1
 3 -5 -10 1227 92.8 2
 -3 5 9 2920.9 132.9 1
 -3 5 9 2990.2 135.5 1
 3 -5 -9 2843 138.9 1
 3 -5 -9 2960.2 146.5 1
 3 -5 -9 2876.2 99 2
 -3 5 8 3304.1 129.8 1
 -3 5 8 3369.6 129.3 1
 3 -5 -8 3490.8 134.1 1
 3 -5 -8 3588.2 136.9 1
 -3 5 7 996.913 104.842 1
 -3 5 7 1154.5 105.5 1
 3 -5 -7 1070.8 114.2 1
 3 -5 -7 845.428 104.474 1
 -3 5 6 4576.5 127.1 1
 -3 5 6 4353.8 123 1
 -3 5 6 4230.7 97.2 2
 3 -5 -6 4475.8 127 1
 3 -5 -6 4539.1 126 1
 3 -5 -6 4125 84.4 4
 -3 5 5 53.018 49.404 1
 -3 5 5 65.158 45.055 1
 -3 5 5 34.13 41.109 2
 -3 5 5 46.524 37.288 5
 3 -5 -5 41.942 48.078 1
 3 -5 -5 138.377 49.346 1
 3 -5 -5 78.022 26.573 3
 3 -5 -5 68.55 29.028 4
 -3 5 4 10018 146.9 1
 -3 5 4 9944.6 145.3 1
 -3 5 4 9876.4 122.2 2
 -3 5 4 9616.9 136.4 5
 3 -5 -4 9526.3 142.7 1
 3 -5 -4 10098.1 146.1 1
 3 -5 -4 9240.3 82.5 3
 3 -5 -4 9319.9 92.2 4
 -3 5 3 13565.2 158.2 1
 -3 5 3 13107.6 155.1 1
 -3 5 3 12727.1 134.1 2
 -3 5 3 12584.4 150.1 5
 3 -5 -3 12626.5 152.9 1
 3 -5 -3 13159 157 1
 3 -5 -3 12506.1 93.1 4
 -3 5 2 336.567 43.39 1
 -3 5 2 368.683 45.053 1
 -3 5 2 360.754 47.121 2
 -3 5 2 302.547 41.382 5
 3 -5 -2 325.386 49.432 1
 3 -5 -2 373.734 45.326 1
 3 -5 -2 417.679 41.661 3
 3 -5 -2 296.112 23.711 4
 -3 5 1 4262.1 97.4 1
 -3 5 1 3951.6 94 1
 -3 5 1 3978.4 89.4 2
 -3 5 1 4122.3 98.9 5
 3 -5 -1 4028 96.8 1
 3 -5 -1 4128 97.1 1
 3 -5 -1 3918.8 70.7 3
 -3 5 0 192.294 41.154 1
 -3 5 0 173.101 38.535 1
 -3 5 0 232.172 41.72 2
 -3 5 0 160.508 37.092 5
 3 -5 0 202.332 39.789 1
 3 -5 0 129.105 40.373 1
 3 -5 0 183.814 34.078 3
 -3 5 -1 10118.8 124.8 1
 -3 5 -1 9813.2 124.4 1
 -3 5 -1 9901.7 126 2
 -3 5 -1 9742.2 134 5
 3 -5 1 10092.3 125.8 1
 3 -5 1 9974.1 125 1
 3 -5 1 9571.4 108.9 3
 -3 5 -2 2572.3 80.6 1
 -3 5 -2 2500.7 84.1 1
 -3 5 -2 2729.6 87.2 2
 -3 5 -2 2739.5 90.4 5
 3 -5 2 2468.6 82.2 1
 3 -5 2 2439.8 81.2 1
 3 -5 2 2551.8 73.7 3
 -3 5 -3 23621.3 174.7 1
 -3 5 -3 22655.4 171.3 1
 -3 5 -3 22867.4 195.7 5
 3 -5 3 22947.7 172 1
 3 -5 3 23196.2 172.4 1
 3 -5 3 22420.3 174.5 3
 -3 5 -4 19714.7 159.7 1
 -3 5 -4 19469.9 158.7 1
 -3 5 -4 18509.8 86.5 4
 -3 5 -4 18887.7 181.7 5
 3 -5 4 18740.5 154.6 1
 3 -5 4 19414.2 157.7 1
 3 -5 4 18459 166.3 3
 3 -5 4 18916.2 180.4 5
 -3 5 -5 2262.1 77.8 1
 -3 5 -5 2482.7 79.1 1
 -3 5 -5 2172.1 46.3 4
 -3 5 -5 2247.4 91.3 5
 3 -5 5 2157.7 72.7 1
 3 -5 5 2389.8 77.5 1
 3 -5 5 2268.2 81.6 3
 3 -5 5 2384.1 88.9 5
 -3 5 -6 4462.1 93.8 1
 -3 5 -6 4493.5 90.3 1
 -3 5 -6 4232.3 62.7 4
 -3 5 -6 4314.7 109.8 5
 3 -5 6 4370.9 87.2 1
 3 -5 6 4518.5 93.7 1
 3 -5 6 4143.9 98.8 3
 3 -5 6 4500.6 108.3 5
 -3 5 -7 4228.6 94.2 1
 -3 5 -7 4295.1 88.7 1
 -3 5 -7 4072.4 69.6 4
 -3 5 -7 4136.7 108.9 5
 3 -5 7 4091.7 89.2 1
 3 -5 7 4343 92.2 1
 3 -5 7 3820.7 100.2 3
 3 -5 7 4017.1 106.7 5
 -3 5 -8 356.04 42.902 1
 -3 5 -8 286.171 39.934 1
 -3 5 -8 340.763 34.2 4
 -3 5 -8 171.668 43.473 5
 3 -5 8 346.982 41.475 1
 3 -5 8 352.053 43.868 1
 3 -5 8 267.796 52.741 3
 3 -5 8 300.048 46.676 5
 -3 5 -9 344.206 45.099 1
 -3 5 -9 475.343 47.68 1
 -3 5 -9 343.836 38.54 4
 -3 5 -9 338.031 50.383 5
 3 -5 9 424.279 44.455 1
 3 -5 9 359.778 43.968 1
 3 -5 9 223.066 46.619 3
 3 -5 9 310.007 47.412 5
 -3 5 -10 333.744 43.719 1
 -3 5 -10 356.017 45.792 1
 -3 5 -10 338.126 42.219 4
 -3 5 -10 293.336 49.297 5
 3 -5 10 328.232 43.51 1
 3 -5 10 373.399 46.527 1
 3 -5 10 242.162 51.648 3
 3 -5 10 344.737 50.287 5
 -3 5 -11 63.024 42.136 1
 -3 5 -11 45.461 38.06 4
 -3 5 -11 33.21 45.33 5
 3 -5 11 -9.195 36.752 1
 3 -5 11 74.127 41.17 1
 3 -5 11 -19.443 45.748 3
 3 -5 11 76.072 43.968 5
 -3 5 -12 1311 83.5 1
 -3 5 -12 1246 78.5 1
 -3 5 -12 1276.4 84.1 4
 -3 5 -12 909.162 109.75 5
 3 -5 12 1194.7 77.8 1
 3 -5 12 1267.2 82.9 1
 3 -5 12 1152.2 91.9 3
 3 -5 12 1164 109.9 5
 -3 5 -13 6892.7 128.6 1
 -3 5 -13 6526.7 118.6 1
 -3 5 -13 6902.2 130.8 4
 -3 5 -13 6912.8 151.9 5
 3 -5 13 6429.9 114.9 1
 3 -5 13 6258 146.8 1
 3 -5 13 6144.4 145.2 3
 3 -5 13 6617.6 148.8 5
 -3 5 -14 1982 95.6 1
 -3 5 -14 1826.7 94.1 1
 -3 5 -14 1899 102.9 4
 -3 5 -14 1983.4 120 5
 3 -5 14 1741.4 85.5 1
 3 -5 14 1975.3 97.9 1
 3 -5 14 1663.5 105.9 3
 3 -5 14 1939.5 112.3 5
 -3 5 -15 66.731 49.978 1
 -3 5 -15 102.663 48.845 1
 -3 5 -15 91.245 52.405 4
 -3 5 -15 -62.965 52.031 5
 3 -5 15 25.882 45.384 1
 3 -5 15 136.106 50.724 1
 3 -5 15 -58.858 54.161 3
 3 -5 15 -72.14 49.424 5
 -3 5 -16 53.451 48.911 1
 -3 5 -16 91.539 53.017 1
 -3 5 -16 95.639 56.432 4
 -3 5 -16 48.426 56.997 5
 3 -5 16 100.526 49.559 1
 3 -5 16 184.576 56.278 1
 3 -5 16 -1.164 60.856 3
 3 -5 16 110.7 56.508 5
 -3 5 -17 351.859 63.811 1
 -3 5 -17 836.797 100.871 1
 -3 5 -17 338.835 67.932 4
 -3 5 -17 503.597 70.978 5
 3 -5 17 475.837 60.788 1
 3 -5 17 467.326 63.867 1
 3 -5 17 441.809 82.438 3
 3 -5 17 476.864 70.473 5
 -3 5 -18 -55.58 57.385 1
 -3 5 -18 -76.365 56.916 1
 -3 5 -18 -59.777 65.531 4
 -3 5 -18 -3.429 64.628 5
 3 -5 18 29.648 57.241 1
 3 -5 18 184.027 63.718 1
 3 -5 18 83.78 72.299 3
 3 -5 18 -8.299 63.248 5
 -3 5 -19 53.849 63.141 1
 -3 5 -19 245.864 66.492 1
 -3 5 -19 227.441 79.6 4
 3 -5 19 148.969 63.525 1
 3 -5 19 163.316 62.805 1
 3 -5 19 -14.829 90.287 3
 3 -5 19 228.805 70.27 5
 -3 4 18 -18.175 92.23 1
 -3 4 18 -272.926 91.385 1
 3 -4 -18 -177.004 99.073 1
 3 -4 -18 34.727 101.235 1
 3 -4 -18 58.291 84.688 2
 -3 4 17 46.515 89.846 1
 3 -4 -17 -111.147 88.477 1
 3 -4 -17 384.992 105.174 1
 3 -4 -17 183.515 75.049 2
 -3 4 16 196.619 79.453 1
 -3 4 16 285.163 93.391 1
 3 -4 -16 343.733 95.307 1
 3 -4 -16 253.326 91.504 1
 3 -4 -16 343.018 73.019 2
 -3 4 15 231.313 85.314 1
 -3 4 15 171.054 89.623 1
 3 -4 -15 80.124 83.334 1
 3 -4 -15 200.823 84.566 1
 3 -4 -15 237.862 66.54 2
 -3 4 14 78.908 69.986 1
 -3 4 14 4.381 79.419 1
 3 -4 -14 16.098 79.02 1
 3 -4 -14 56.691 75.727 1
 3 -4 -14 80.522 59.022 2
 -3 4 13 570.817 81.43 1
 -3 4 13 794.581 91.485 1
 3 -4 -13 584.599 84.76 1
 3 -4 -13 562.786 79.292 1
 3 -4 -13 1228.2 99.2 2
 -3 4 12 6524.3 168.5 1
 -3 4 12 6353 186.5 1
 3 -4 -12 5792.5 253.5 1
 3 -4 -12 6667.8 171.9 1
 3 -4 -12 7210.1 130 2
 -3 4 11 7208.6 165.6 1
 -3 4 11 7458.8 170.2 1
 3 -4 -11 7342.3 168.6 1
 3 -4 -11 7183.5 173.6 1
 3 -4 -11 7828.1 130.6 2
 -3 4 10 394.427 70.554 1
 -3 4 10 544.489 76.432 1
 3 -4 -10 387.839 72.903 1
 3 -4 -10 561.768 72.746 1
 3 -4 -10 435.976 58.656 2
 -3 4 9 2988.5 118.9 1
 -3 4 9 3086.8 124.7 1
 3 -4 -9 3082.8 128.3 1
 3 -4 -9 3070.9 122.6 1
 3 -4 -9 2767.4 93.8 2
 -3 4 8 110.976 53.392 1
 -3 4 8 84.391 50.419 1
 3 -4 -8 25.021 54.899 1
 3 -4 -8 111.485 53.866 1
 3 -4 -8 -45.85 41.697 2
 -3 4 7 2288.3 100.3 1
 -3 4 7 2366.8 102.2 1
 3 -4 -7 2304.9 106.3 1
 3 -4 -7 2291.6 103.9 1
 3 -4 -7 2254.4 82.1 2
 -3 4 6 -11.256 43.827 1
 -3 4 6 -58.347 40.573 1
 -3 4 6 -41.239 38.564 2
 3 -4 -6 -52.556 41.426 1
 3 -4 -6 -44.34 40.984 1
 3 -4 -6 -7.516 38.734 2
 -3 4 5 3285.6 100.4 1
 -3 4 5 3253 100.7 1
 -3 4 5 3273.3 84.9 2
 3 -4 -5 3200.8 101.6 1
 3 -4 -5 3044.1 98.7 1
 3 -4 -5 3594.8 86.7 2
 3 -4 -5 3292.1 55.9 3
 -3 4 4 8147.6 124.5 1
 -3 4 4 8199.2 124.2 1
 -3 4 4 8031.8 109.1 2
 3 -4 -4 8440.2 124.6 1
 3 -4 -4 7940.2 122.7 1
 3 -4 -4 7666.2 76.9 3
 -3 4 3 6179 107 1
 -3 4 3 5457.4 102.3 1
 -3 4 3 5546.8 95.2 2
 3 -4 -3 5601.9 105.7 1
 3 -4 -3 5781.2 105.2 1
 3 -4 -3 5392.2 58.1 4
 -3 4 2 1.199 34.378 1
 -3 4 2 44.073 33.364 1
 -3 4 2 -31.568 33.668 2
 -3 4 2 0.399 30.741 5
 3 -4 -2 30.83 34.62 1
 3 -4 -2 61.676 32.896 1
 3 -4 -2 32.429 25.941 3
 -3 4 1 29.379 31.101 1
 -3 4 1 8.582 31.116 1
 -3 4 1 49.293 34.418 2
 -3 4 1 74.538 29.932 5
 3 -4 -1 88.425 31.799 1
 3 -4 -1 13.543 33.13 1
 3 -4 -1 41.592 26.576 3
 -3 4 0 6932.2 99.5 1
 -3 4 0 6773.2 97.7 1
 -3 4 0 6708.4 100.8 2
 -3 4 0 6791.2 107.6 5
 3 -4 0 6791.1 97.6 1
 3 -4 0 7033.7 99.3 1
 3 -4 0 6780.4 87.1 3
 -3 4 -1 392.451 38.265 1
 -3 4 -1 332.266 39.335 1
 -3 4 -1 413.434 43.336 2
 -3 4 -1 361.735 39.095 5
 3 -4 1 396.046 39.751 1
 3 -4 1 347.649 36.919 1
 3 -4 1 418.978 45.976 3
 -3 4 -2 22617.3 152.4 1
 -3 4 -2 22367.4 151.9 1
 -3 4 -2 22014.3 173.1 2
 -3 4 -2 21967.9 177.6 5
 3 -4 2 21839.1 149.5 1
 3 -4 2 22272.4 150.7 1
 3 -4 2 21496.3 157.3 3
 -3 4 -3 14965.3 123.9 1
 -3 4 -3 14692.3 123.1 1
 -3 4 -3 14836.1 150.3 5
 3 -4 3 14637.9 122.6 1
 3 -4 3 14906.9 123.6 1
 3 -4 3 14248.9 136 3
 -3 4 -4 -7.139 28.985 1
 -3 4 -4 -12.1 29.568 1
 -3 4 -4 60.034 32.064 5
 3 -4 4 -5.095 28.47 1
 3 -4 4 -37.095 28.383 1
 3 -4 4 78.248 35.608 3
 -3 4 -5 32293.3 172.6 1
 -3 4 -5 32456.5 172.4 1
 -3 4 -5 30966 120.8 4
 -3 4 -5 31699.2 216.6 5
 3 -4 5 31483.8 167.8 1
 3 -4 5 32193.9 170.7 1
 3 -4 5 31626.9 212.4 3
 3 -4 5 31523.5 215.9 5
 -3 4 -6 2623.8 68 1
 -3 4 -6 2474.8 64.7 1
 -3 4 -6 2376.5 51.9 4
 -3 4 -6 2310.1 84.7 5
 3 -4 6 2430.9 61.6 1
 3 -4 6 2520.8 66.7 1
 3 -4 6 2322.4 81.3 3
 3 -4 6 2474.4 84.1 5
 -3 4 -7 1350.9 58.4 1
 -3 4 -7 1322.4 56.8 1
 -3 4 -7 1264.1 51.7 4
 -3 4 -7 1301.9 76.3 5
 3 -4 7 1308.2 55.9 1
 3 -4 7 1272.9 58.1 1
 3 -4 7 1259.2 73.5 3
 3 -4 7 1249.2 73.2 5
 -3 4 -8 1990.4 64.2 1
 -3 4 -8 2142.6 67 1
 -3 4 -8 1906.9 84.4 5
 3 -4 8 2085.1 63.8 1
 3 -4 8 2060.8 63.7 1
 3 -4 8 1938.9 84.6 3
 3 -4 8 1960.5 82.2 5
 -3 4 -9 369.81 37.892 1
 -3 4 -9 441.156 39.804 1
 -3 4 -9 367.006 44.646 5
 3 -4 9 419.463 37.233 1
 3 -4 9 391.799 38.443 1
 3 -4 9 353.134 53.782 3
 3 -4 9 377.661 43.497 5
 -3 4 -10 825.399 61.97 1
 -3 4 -10 900.641 60.382 1
 -3 4 -10 989.152 80.863 5
 3 -4 10 862.864 58.494 1
 3 -4 10 914.365 61.182 1
 3 -4 10 930.315 81.672 3
 3 -4 10 867.911 75.6 5
 -3 4 -11 1562.6 70.2 1
 -3 4 -11 1608.8 68.4 1
 -3 4 -11 1528.4 90.2 5
 3 -4 11 1575.2 66.2 1
 3 -4 11 1569 70.8 1
 3 -4 11 1387.5 91.2 3
 3 -4 11 1470.8 88.8 5
 -3 4 -12 68.129 37.809 1
 -3 4 -12 82.719 36.438 1
 -3 4 -12 74.606 42.55 5
 3 -4 12 27.685 33.542 1
 3 -4 12 52.888 39.175 1
 3 -4 12 45.031 51.854 3
 3 -4 12 115.167 43.331 5
 -3 4 -13 2904 89.7 1
 -3 4 -13 2905.7 90 1
 -3 4 -13 2931.7 114.2 5
 3 -4 13 2715.6 82.9 1
 3 -4 13 2683.1 89.2 1
 3 -4 13 2831.5 115.1 3
 3 -4 13 2840.7 108.5 5
 -3 4 -14 243.904 47.034 1
 -3 4 -14 103.6 44.717 1
 -3 4 -14 177.725 50.015 5
 3 -4 14 181.154 41.376 1
 3 -4 14 174.963 48.089 1
 3 -4 14 156.747 64.293 3
 3 -4 14 52.639 84.922 5
 -3 4 -15 9.384 54.045 1
 -3 4 -15 97.257 45.173 1
 -3 4 -15 -33.48 51.808 5
 3 -4 15 72.556 41.8 1
 3 -4 15 55.558 45.506 1
 3 -4 15 42.658 58.902 3
 3 -4 15 60.154 46.325 5
 -3 4 -16 779.885 86.367 1
 -3 4 -16 708.256 85.263 1
 -3 4 -16 449.216 64.719 5
 3 -4 16 595.85 55.669 1
 3 -4 16 629.271 60.492 1
 3 -4 16 516.874 75.732 3
 3 -4 16 540.712 64.003 5
 -3 4 -17 93.019 50.441 1
 -3 4 -17 28.883 49.084 1
 -3 4 -17 -106.303 53.215 5
 3 -4 17 43.689 45.72 1
 3 -4 17 168.327 53.579 1
 3 -4 17 -33.648 65.754 3
 3 -4 17 7.807 53.443 5
 -3 4 -18 125.211 55.959 1
 -3 4 -18 37.563 58.432 1
 -3 4 -18 172.784 62.14 5
 3 -4 18 140.897 50.384 1
 3 -4 18 136.953 58.652 1
 3 -4 18 69.1 73.975 3
 3 -4 18 264.146 61.878 5
 -3 4 -19 1236.5 110.9 1
 -3 4 -19 1046.9 82.2 1
 3 -4 19 996.591 100.082 1
 3 -4 19 1156.7 111 1
 3 -4 19 849.322 100.926 3
 3 -4 19 1095.5 126.1 5
 -3 3 19 112.995 100.863 1
 -3 3 19 -49.948 101.174 1
 3 -3 -19 -45.452 99.604 1
 3 -3 -19 -126.641 101.537 1
 3 -3 -19 169.337 142.768 2
 -3 3 18 388.297 97.353 1
 -3 3 18 499.967 110.133 1
 3 -3 -18 432.391 103.561 1
 3 -3 -18 243.807 99.218 1
 3 -3 -18 431.779 79.226 2
 -3 3 17 170.316 85.799 1
 -3 3 17 -131.959 88.442 1
 3 -3 -17 133.342 87.584 1
 3 -3 -17 -7.774 81.882 1
 3 -3 -17 55.939 71.129 2
 -3 3 16 249.611 82.81 1
 -3 3 16 -4.018 78.661 1
 3 -3 -16 36.581 79.492 1
 3 -3 -16 41.897 73.604 1
 3 -3 -16 20.403 65.062 2
 -3 3 15 110.746 72.992 1
 -3 3 15 -135.068 75.566 1
 3 -3 -15 33.445 76.151 1
 3 -3 -15 23.283 73.593 1
 3 -3 -15 106.809 61.073 2
 -3 3 14 426.992 76.396 1
 -3 3 14 563.113 87.347 1
 3 -3 -14 435.609 80.813 1
 3 -3 -14 491.429 83.943 1
 3 -3 -14 725.7 74.359 2
 -3 3 13 268.761 75.675 1
 -3 3 13 199.116 73.75 1
 3 -3 -13 111.666 110.089 1
 3 -3 -13 219.803 82.047 1
 3 -3 -13 300.405 61.599 2
 -3 3 12 2857.4 136.6 1
 -3 3 12 2888.8 142 1
 3 -3 -12 2829.3 137.6 1
 3 -3 -12 3072.7 137.6 1
 3 -3 -12 3244.3 110.3 2
 -3 3 11 8260.8 163.4 1
 -3 3 11 8077.6 166.7 1
 3 -3 -11 7911.7 162.4 1
 3 -3 -11 8036.9 161.5 1
 3 -3 -11 8382.4 132.9 2
 -3 3 10 11221.6 172.3 1
 -3 3 10 10845.4 169.3 1
 3 -3 -10 11140.7 172.4 1
 3 -3 -10 11289 172.5 1
 3 -3 -10 11581.2 143.2 2
 -3 3 9 24209.3 219.1 1
 -3 3 9 24301.8 219.6 1
 3 -3 -9 24158.6 219.8 1
 3 -3 -9 24546.4 220.6 1
 3 -3 -9 24708.9 186.5 2
 -3 3 8 10.043 40.698 1
 -3 3 8 32.706 42.279 1
 3 -3 -8 -12.865 43.78 1
 3 -3 -8 26.483 44.641 1
 3 -3 -8 10.109 40.034 2
 -3 3 7 19.713 38.528 1
 -3 3 7 -42.756 37.247 1
 3 -3 -7 -34.227 42.019 1
 3 -3 -7 -16.592 36.599 1
 3 -3 -7 -18.053 39.494 2
 -3 3 6 5757.6 109.9 1
 -3 3 6 5497.7 108.4 1
 -3 3 6 5695.1 98.2 2
 3 -3 -6 5440.2 112.2 1
 3 -3 -6 5652.4 107.8 1
 3 -3 -6 5843.1 97.7 2
 -3 3 5 3560.3 92 1
 -3 3 5 3390.3 88.8 1
 -3 3 5 3584.9 85.4 2
 3 -3 -5 3298.2 94.4 1
 3 -3 -5 3451.5 89.4 1
 3 -3 -5 3660 80.9 2
 3 -3 -5 3432.6 59.8 3
 -3 3 4 3293.2 84.5 1
 -3 3 4 3283.7 84.6 1
 -3 3 4 3273.1 78.7 2
 3 -3 -4 3215.9 85.5 1
 3 -3 -4 3394.4 85.4 1
 3 -3 -4 3304 78.9 2
 3 -3 -4 3349.8 61.8 3
 -3 3 3 3632 83 1
 -3 3 3 3768.4 83.4 1
 -3 3 3 3616.1 81.2 2
 3 -3 -3 3581.1 83.2 1
 3 -3 -3 3621.7 83.3 1
 3 -3 -3 3611.6 82 2
 -3 3 2 5931.1 92.2 1
 -3 3 2 5910 92.3 1
 -3 3 2 5634.1 91.2 2
 3 -3 -2 5707.9 90.7 1
 3 -3 -2 5950.2 92 1
 3 -3 -2 5803.7 94.7 2
 3 -3 -2 5756.3 75.4 3
 -3 3 1 735.677 55.698 1
 -3 3 1 552.116 53.466 1
 -3 3 1 613.938 49.953 2
 3 -3 -1 571.614 54.162 1
 3 -3 -1 613.527 53.566 1
 3 -3 -1 560.902 44.497 3
 -3 3 0 -44.261 25.402 1
 -3 3 0 8.503 25.949 1
 -3 3 0 -46.089 30.168 2
 -3 3 0 -0.09109 27.6812 5
 3 -3 0 -4.462 25.193 1
 3 -3 0 -23.632 26.179 1
 3 -3 0 -11.722 25.922 3
 -3 3 -1 1415.1 50.9 1
 -3 3 -1 1324.2 52.4 1
 -3 3 -1 1299.3 61.4 2
 -3 3 -1 1388.3 64.4 5
 3 -3 1 1244.6 51 1
 3 -3 1 1373.3 52.4 1
 3 -3 1 1409.6 55.2 3
 -3 3 -2 3996.9 65.5 1
 -3 3 -2 3860.4 65.1 1
 -3 3 -2 3865.2 83.3 2
 -3 3 -2 3934 83.8 5
 3 -3 2 3938.9 65.8 1
 3 -3 2 4077.9 66.2 1
 3 -3 2 4209.7 77.7 3
 -3 3 -3 5511.5 70.6 1
 -3 3 -3 5274.1 69.9 1
 -3 3 -3 5295.2 94.4 2
 -3 3 -3 5468.9 95.2 5
 3 -3 3 5426.9 70 1
 3 -3 3 5442 69.9 1
 3 -3 3 5271.9 87.9 3
 -3 3 -4 9504.5 84.4 1
 -3 3 -4 9479.3 83.9 1
 -3 3 -4 9415.2 117 5
 3 -3 4 9460.4 83.1 1
 3 -3 4 9379.2 82.6 1
 3 -3 4 9146.3 113.7 3
 -3 3 -5 10432.7 87.6 1
 -3 3 -5 10237.8 86 1
 -3 3 -5 10419.8 123.9 5
 3 -3 5 10226.9 85.3 1
 3 -3 5 10197.7 122.9 3
 -3 3 -6 2448 52.9 1
 -3 3 -6 2483.4 52.8 1
 -3 3 -6 2565.4 79 5
 3 -3 6 2400.9 52.5 1
 3 -3 6 2420.4 76.9 3
 3 -3 6 2487.8 77.2 5
 -3 3 -7 3830.6 61 1
 -3 3 -7 3765.3 60.1 1
 -3 3 -7 3878.7 90.3 5
 3 -3 7 3707.7 59.4 1
 3 -3 7 3726.2 91.5 3
 3 -3 7 3740.3 88.6 5
 -3 3 -8 5085.7 70.1 1
 -3 3 -8 5076.9 68.8 1
 -3 3 -8 5018.7 100.1 5
 3 -3 8 5006.5 67.8 1
 3 -3 8 4890.7 103.8 3
 3 -3 8 4996 99 5
 -3 3 -9 17.738 25.624 1
 -3 3 -9 60.858 25.79 1
 -3 3 -9 33.475 31.557 5
 3 -3 9 51.652 25.338 1
 3 -3 9 76.665 44.294 3
 3 -3 9 82.226 32.676 5
 -3 3 -10 19.194 28.087 1
 -3 3 -10 10.823 27.688 1
 -3 3 -10 71.193 33.697 5
 3 -3 10 34.143 27.667 1
 3 -3 10 -42.385 44.466 3
 3 -3 10 12.951 33.137 5
 -3 3 -11 1122.5 57.6 1
 -3 3 -11 1155.4 58 1
 -3 3 -11 1015.2 77.4 5
 3 -3 11 1063.7 59.8 1
 3 -3 11 961.017 85.258 3
 3 -3 11 1071 76.5 5
 -3 3 -12 1727.8 67.9 1
 -3 3 -12 1701.1 66.6 1
 -3 3 -12 1607.7 88.5 5
 3 -3 12 1463.2 83.4 1
 3 -3 12 1688.9 68.3 1
 3 -3 12 1584.4 98.3 3
 3 -3 12 1654.5 85.1 5
 -3 3 -13 330.26 41.54 1
 -3 3 -13 335.255 40.583 1
 -3 3 -13 316.522 49.13 5
 3 -3 13 306.729 39.63 1
 3 -3 13 341.668 41.929 1
 3 -3 13 333.513 61.971 3
 3 -3 13 277.658 46.05 5
 -3 3 -14 10349.6 122.9 1
 -3 3 -14 10150.5 123.5 1
 -3 3 -14 10102.3 158 5
 3 -3 14 9750.6 116.1 1
 3 -3 14 10048.9 120.6 1
 3 -3 14 9685.5 169.9 3
 3 -3 14 10049.6 152.7 5
 -3 3 -15 2123.6 88.2 1
 -3 3 -15 2100.6 87.3 1
 -3 3 -15 1999 109.8 5
 3 -3 15 1957 82.6 1
 3 -3 15 2075.2 87.2 1
 3 -3 15 2094.7 116.7 3
 3 -3 15 2034.2 103.6 5
 -3 3 -16 785.54 72.745 1
 -3 3 -16 868.249 83.564 1
 -3 3 -16 1038.8 101.8 5
 3 -3 16 784.146 76.708 1
 3 -3 16 970.967 83.601 1
 3 -3 16 729.518 80.374 3
 3 -3 16 994.101 100.096 5
 -3 3 -17 1155.4 92.5 1
 -3 3 -17 1363.4 94.6 1
 -3 3 -17 1117.3 136.9 5
 3 -3 17 1194.9 85.4 1
 3 -3 17 1346.8 95 1
 3 -3 17 1263.6 115.1 3
 3 -3 17 1243.9 105 5
 -3 3 -18 165.989 54.003 1
 -3 3 -18 136.241 57.15 1
 3 -3 18 178.221 49.409 1
 3 -3 18 182.718 54.59 1
 3 -3 18 180.484 70.626 3
 3 -3 18 121.347 52.472 5
 -3 3 -19 245.742 62.638 1
 -3 3 -19 299.384 66.357 1
 3 -3 19 220.462 57.766 1
 3 -3 19 253.225 59.731 1
 3 -3 19 193.445 74.364 3
 3 -3 19 145.066 58.489 5
 -3 3 -20 465.699 71.527 1
 -3 3 -20 692.474 75.817 1
 3 -3 20 419.77 68.195 1
 3 -3 20 516.983 67.514 1
 3 -3 20 492.055 101.475 3
 3 -3 20 470.426 70.28 5
 -3 2 20 3022.7 209.9 1
 -3 2 20 2661.3 211.3 1
 -3 2 20 1753.7 105.1 3
 3 -2 -20 3170.9 217.8 1
 3 -2 -20 2631.1 219.3 1
 3 -2 -20 2463.5 169.6 2
 -3 2 19 2741.4 190.9 1
 -3 2 19 2290.6 182.7 1
 3 -2 -19 2510.2 192.3 1
 3 -2 -19 2855.3 202.3 1
 3 -2 -19 2485.2 156.2 2
 -3 2 18 591.575 100.865 1
 -3 2 18 736.537 105.372 1
 3 -2 -18 648.268 106.848 1
 3 -2 -18 429.576 105.743 1
 3 -2 -18 517.36 105.162 2
 -3 2 17 3028.2 171.4 1
 -3 2 17 2741.8 168.6 1
 3 -2 -17 2655.5 163.7 1
 3 -2 -17 2810.6 168.2 1
 3 -2 -17 2894.5 140.7 2
 -3 2 16 59.864 71.081 1
 -3 2 16 -37.587 73.713 1
 3 -2 -16 14.038 72.334 1
 3 -2 -16 -39.754 74.422 1
 3 -2 -16 -4.369 66.959 2
 -3 2 15 -28.348 69.333 1
 -3 2 15 -16.686 70.83 1
 3 -2 -15 6.525 69.675 1
 3 -2 -15 -125.837 66.966 1
 3 -2 -15 0.07655 62.3216 2
 -3 2 14 -91.844 63.849 1
 -3 2 14 -49.269 67.996 1
 3 -2 -14 -100.058 80.787 1
 3 -2 -14 -60.858 66.268 1
 3 -2 -14 -4.695 59.241 2
 -3 2 13 902.829 86.802 1
 -3 2 13 871.91 79.981 1
 3 -2 -13 851.769 81.211 1
 3 -2 -13 972.303 119.271 1
 3 -2 -13 1331.3 102.2 2
 -3 2 12 -91.653 58.589 1
 -3 2 12 -102.327 61.109 1
 3 -2 -12 -92.651 59.926 1
 3 -2 -12 22.431 62.428 1
 3 -2 -12 120.913 53.502 2
 -3 2 11 410.464 64.55 1
 -3 2 11 643.638 70.908 1
 3 -2 -11 505.762 69.518 1
 3 -2 -11 486.196 66.515 1
 3 -2 -11 740.875 86.634 2
 -3 2 10 6642.7 139 1
 -3 2 10 6449.6 136.4 1
 3 -2 -10 6818.1 142.9 1
 3 -2 -10 6702.8 140.3 1
 3 -2 -10 7075.5 121.2 2
 -3 2 9 1322.7 90.7 1
 -3 2 9 1306.5 91.5 1
 3 -2 -9 1256.2 92.1 1
 3 -2 -9 1472.9 93.1 1
 3 -2 -9 1384 78.9 2
 -3 2 8 1483 85.8 1
 -3 2 8 1595.4 87.1 1
 3 -2 -8 1545.4 86.1 1
 3 -2 -8 1568.9 84.7 1
 3 -2 -8 1554.6 75.2 2
 -3 2 7 -69.425 35.791 1
 -3 2 7 -39.768 38.367 1
 3 -2 -7 -16.811 36.122 1
 3 -2 -7 -32.153 34.181 1
 3 -2 -7 9.045 34.17 2
 -3 2 6 757.611 69.077 1
 -3 2 6 707.544 68.211 1
 3 -2 -6 666.037 69.541 1
 3 -2 -6 785.401 66.633 1
 3 -2 -6 774.694 62.792 2
 -3 2 5 353.309 44.077 1
 -3 2 5 296.197 41.838 1
 -3 2 5 280.461 42.308 2
 3 -2 -5 282.057 39.002 1
 3 -2 -5 236.438 36.641 1
 3 -2 -5 265.513 40.291 2
 3 -2 -5 379.727 43.105 3
 3 -2 -5 309.1 29.163 4
 -3 2 4 4115.8 84.9 1
 -3 2 4 3924.1 81.9 1
 -3 2 4 3952.1 85.5 2
 3 -2 -4 3759.1 83.3 1
 3 -2 -4 4018.3 83.8 1
 3 -2 -4 4151.5 84.9 2
 3 -2 -4 4251 68.5 3
 3 -2 -4 3646.5 58.7 4
 -3 2 3 66925.2 250.3 1
 -3 2 3 64525.9 245.5 1
 -3 2 3 64990.6 262.2 2
 3 -2 -3 64699.9 246.2 1
 3 -2 -3 65214.9 246.2 1
 3 -2 -3 66017.9 264.8 2
 3 -2 -3 66208.8 227 3
 3 -2 -3 61634.6 167.9 4
 -3 2 2 56487.6 216.9 1
 -3 2 2 54028.9 212.1 1
 -3 2 2 54619 240.3 2
 3 -2 -2 54939.2 214.5 1
 3 -2 -2 55095.6 213.3 1
 3 -2 -2 54424.4 239.5 2
 3 -2 -2 56071.4 214.4 3
 3 -2 -2 52216.6 134.5 4
 -3 2 1 864.145 48.798 1
 -3 2 1 816.21 48.89 1
 -3 2 1 593.765 56.227 2
 3 -2 -1 842.421 52.104 1
 3 -2 -1 888.535 50.234 1
 3 -2 -1 709.122 58.464 2
 3 -2 -1 742.503 50.97 3
 -3 2 0 13397.2 99.1 1
 -3 2 0 13017.4 96.6 1
 -3 2 0 12748.7 123.2 2
 3 -2 0 13036.9 97.4 1
 3 -2 0 13245.9 98.2 1
 3 -2 0 13267.2 126 2
 3 -2 0 12945.1 114.6 3
 -3 2 -1 4044.1 58.4 1
 -3 2 -1 4095.7 59.5 1
 -3 2 -1 3929.1 80.4 2
 3 -2 1 4127.1 59.1 1
 3 -2 1 4063 57.7 1
 3 -2 1 4006.8 75.8 3
 -3 2 -2 482.319 35.446 1
 -3 2 -2 482.642 35.804 1
 -3 2 -2 510.952 44.59 2
 -3 2 -2 503.341 25.732 4
 -3 2 -2 473.533 53.719 5
 3 -2 2 506.576 34.011 1
 3 -2 2 429.388 49.525 3
 -3 2 -3 4523.7 51.7 1
 -3 2 -3 4380.4 84.5 2
 -3 2 -3 4599 49.8 4
 -3 2 -3 4596.4 82.9 5
 3 -2 3 59.903 11.822 1
 3 -2 3 4472.8 50.1 1
 3 -2 3 4483.6 82.6 3
 -3 2 -4 13488.7 73.1 1
 -3 2 -4 13251.4 71.8 1
 -3 2 -4 13232.9 131.5 2
 -3 2 -4 13342.7 86.1 4
 -3 2 -4 13255.4 126.7 5
 3 -2 4 13288.2 69.3 1
 3 -2 4 12996.9 69.3 1
 3 -2 4 12901.1 128.7 3
 -3 2 -5 174.498 17.982 1
 -3 2 -5 168.676 18.493 1
 -3 2 -5 107.81 35.236 2
 -3 2 -5 145.151 27.907 5
 3 -2 5 181.862 17.15 1
 3 -2 5 192.609 17.713 1
 3 -2 5 97.11 33.271 3
 -3 2 -6 824.011 31.93 1
 -3 2 -6 746.583 57.948 5
 3 -2 6 690.456 27.765 1
 3 -2 6 756.903 57.124 3
 -3 2 -7 3012.9 41.8 1
 -3 2 -7 3089 43.2 1
 -3 2 -7 3054.1 76.4 5
 3 -2 7 2996.1 40.9 1
 3 -2 7 2983.9 40.8 1
 3 -2 7 3016.6 82 3
 3 -2 7 3135 77 5
 -3 2 -8 8.355 18.927 1
 -3 2 -8 -5.29 18.33 1
 -3 2 -8 24.191 26.872 5
 3 -2 8 4.16 16.694 1
 3 -2 8 -10.213 19.348 1
 3 -2 8 -52.613 35.13 3
 3 -2 8 -4.19 26.38 5
 -3 2 -9 1177.1 41.2 1
 -3 2 -9 1247.3 42.6 1
 -3 2 -9 1192.4 65.6 5
 3 -2 9 1163.6 38.4 1
 3 -2 9 1186 41.1 1
 3 -2 9 1161.8 73.4 3
 3 -2 9 1121.6 64.3 5
 -3 2 -10 791.387 44.204 1
 -3 2 -10 829.02 45.124 1
 -3 2 -10 824.929 65.058 5
 3 -2 10 790.712 40.594 1
 3 -2 10 782.677 44.078 1
 3 -2 10 767.876 74.051 3
 3 -2 10 699.004 61.853 5
 -3 2 -11 1508.9 55.1 1
 -3 2 -11 1259.9 85.9 1
 -3 2 -11 1572 75.9 5
 3 -2 11 966.938 41.075 1
 3 -2 11 1646.7 54.5 1
 3 -2 11 1547.3 86.4 3
 3 -2 11 1496 73.3 5
 -3 2 -12 515.547 39.7 1
 -3 2 -12 630.855 71.116 5
 3 -2 12 17.635 17.666 1
 3 -2 12 514.46 54.933 1
 3 -2 12 503.849 61.72 3
 3 -2 12 552.475 68.201 5
 -3 2 -13 946.547 61.925 1
 -3 2 -13 867.48 62.874 1
 -3 2 -13 947.271 81.154 5
 3 -2 13 882.459 62.198 1
 3 -2 13 755.158 89.369 3
 3 -2 13 831.889 73.955 5
 -3 2 -14 280.408 40.576 1
 -3 2 -14 408.297 43.83 1
 -3 2 -14 277.47 47.09 5
 3 -2 14 367.507 42.849 1
 3 -2 14 313.301 64.883 3
 3 -2 14 277.315 43.412 5
 -3 2 -15 -19.688 39.205 1
 -3 2 -15 -22.902 39.512 1
 -3 2 -15 82.672 43.651 5
 3 -2 15 -50.743 38.017 1
 3 -2 15 48.102 59.94 3
 3 -2 15 43.347 39.179 5
 -3 2 -16 169.798 46.144 1
 -3 2 -16 232.564 48.222 1
 -3 2 -16 215.443 51.576 5
 3 -2 16 305.165 56.526 1
 3 -2 16 207.841 78.823 1
 3 -2 16 128.713 65.216 3
 3 -2 16 208.841 44.659 5
 -3 2 -17 109.529 48.319 1
 -3 2 -17 108.135 48.889 1
 3 -2 17 132.68 46.385 1
 3 -2 17 112.241 45.792 1
 3 -2 17 158.112 66.881 3
 3 -2 17 74.634 42.981 5
 -3 2 -18 -20.26 49.231 1
 -3 2 -18 -17.472 51.864 1
 3 -2 18 54.659 46.69 1
 3 -2 18 81.212 50.206 1
 3 -2 18 37.056 63.248 3
 3 -2 18 84.646 47.39 5
 -3 2 -19 37.231 54.279 1
 -3 2 -19 21.823 54.851 1
 3 -2 19 173.414 55.006 1
 3 -2 19 69.878 53.127 1
 3 -2 19 40.589 72.359 3
 3 -2 19 26.651 57.897 5
 -3 2 -20 -26.295 58.861 1
 -3 2 -20 154.393 63.4 1
 3 -2 20 50.65 57.042 1
 3 -2 20 146.343 58.737 1
 3 -2 20 -26.445 75.334 3
 3 -2 20 37.996 55.783 5
 -3 1 20 -220.29 102.151 1
 -3 1 20 130.29 106.469 1
 -3 1 20 -188.335 75.318 5
 3 -1 -20 -301.647 101.164 1
 3 -1 -20 -44.674 103.782 1
 3 -1 -20 179.661 104.419 2
 -3 1 19 630.686 109.512 1
 -3 1 19 709.783 113.739 1
 3 -1 -19 598.17 108.168 1
 3 -1 -19 603.427 110.671 1
 3 -1 -19 1018.6 114.6 2
 -3 1 18 41.448 86.595 1
 -3 1 18 280.289 87.192 1
 3 -1 -18 25.438 86.643 1
 3 -1 -18 8.283 88.149 1
 3 -1 -18 116.524 86.282 2
 -3 1 17 55.83 79.406 1
 -3 1 17 209.61 85.779 1
 3 -1 -17 141.906 81.365 1
 3 -1 -17 -39.154 82.617 1
 3 -1 -17 31.438 89.841 2
 -3 1 16 2640.6 153.2 1
 -3 1 16 2327.4 149.7 1
 3 -1 -16 2565.4 150.6 1
 3 -1 -16 2795.7 154 1
 3 -1 -16 2756.7 142.5 2
 -3 1 15 688.198 85.087 1
 -3 1 15 569.746 129.329 1
 3 -1 -15 874.303 86.327 1
 3 -1 -15 693.75 83.006 1
 3 -1 -15 929.39 90.268 2
 -3 1 14 182.932 76.086 1
 -3 1 14 134.465 63.713 1
 3 -1 -14 210.613 72.537 1
 3 -1 -14 299.928 97.221 1
 3 -1 -14 176.245 68.11 2
 -3 1 13 388.381 71.522 1
 -3 1 13 250.774 65.564 1
 3 -1 -13 276.495 66.556 1
 3 -1 -13 352.775 71.307 1
 3 -1 -13 332.484 67.046 2
 -3 1 12 9699 165.9 1
 -3 1 12 9114.9 160.9 1
 3 -1 -12 9127.9 164.6 1
 3 -1 -12 9563 166.8 1
 3 -1 -12 9750.5 155.3 2
 -3 1 11 16512.2 192.5 1
 -3 1 11 15876 188 1
 3 -1 -11 16125.4 191.9 1
 3 -1 -11 16105.9 191.1 1
 3 -1 -11 16486.6 176 2
 -3 1 10 2543.7 106.9 1
 -3 1 10 2329 100.7 1
 3 -1 -10 2485 107.6 1
 3 -1 -10 2518.3 106.1 1
 3 -1 -10 2552.5 95.1 2
 -3 1 9 23989.4 202.4 1
 -3 1 9 23232.6 198.4 1
 3 -1 -9 22848.9 197.5 1
 3 -1 -9 23386.9 199.3 1
 3 -1 -9 23443.6 186.6 2
 3 -1 -9 21532.8 174 4
 -3 1 8 4981.8 106.6 1
 -3 1 8 4945.3 105.1 1
 3 -1 -8 4874.2 106 1
 3 -1 -8 4860.1 105.1 1
 3 -1 -8 4721.6 99 2
 3 -1 -8 4419.7 89 4
 -3 1 7 9394.6 125 1
 -3 1 7 8864.1 121 1
 3 -1 -7 8694 121.1 1
 3 -1 -7 8924.8 121.6 1
 3 -1 -7 8711.9 116.9 2
 3 -1 -7 8127.6 102.3 4
 -3 1 6 -0.188 31.194 1
 -3 1 6 -10.436 29.188 1
 3 -1 -6 -41.005 32.99 1
 3 -1 -6 -39.645 30.77 1
 3 -1 -6 -39.799 30.04 2
 3 -1 -6 13.749 26.785 4
 -3 1 5 5079.6 90.7 1
 -3 1 5 4924 89.4 1
 3 -1 -5 4865.7 89 1
 3 -1 -5 5059.2 89.4 1
 3 -1 -5 5059.7 91.7 2
 3 -1 -5 4610.9 72.9 4
 -3 1 4 512.964 58.369 1
 -3 1 4 514.874 40.897 1
 -3 1 4 532.646 45.439 2
 3 -1 -4 608.165 42.897 1
 3 -1 -4 451.715 54.794 1
 3 -1 -4 611.621 55.558 2
 3 -1 -4 466.272 51.771 3
 3 -1 -4 616.519 46.41 4
 -3 1 3 10752.7 104.9 1
 -3 1 3 10204.6 102.4 1
 -3 1 3 10395.6 117 2
 3 -1 -3 10119.2 102.3 1
 3 -1 -3 10321.2 103 1
 3 -1 -3 10473.3 114.8 2
 3 -1 -3 10569.7 103.5 3
 3 -1 -3 9917.1 83.4 4
 -3 1 2 34017 159.5 1
 -3 1 2 33322.2 157.4 1
 -3 1 2 32980.9 187.6 2
 -3 1 2 32635.6 131.1 4
 3 -1 -2 32907.2 157.1 1
 3 -1 -2 34497.6 160 1
 3 -1 -2 34057.9 190.2 2
 3 -1 -2 34554.5 177.1 3
 3 -1 -2 32395.5 130.8 4
 -3 1 1 28993.5 135.5 1
 -3 1 1 28462.5 134.3 1
 -3 1 1 28497.1 173.9 2
 -3 1 1 28118.5 116 4
 3 -1 -1 28300.9 133.9 1
 3 -1 -1 28590.7 133.7 1
 3 -1 -1 28681.7 173.7 2
 3 -1 -1 29314.4 166 3
 3 -1 -1 27878.2 116 4
 -3 1 0 24174.3 112.7 1
 -3 1 0 23808 111.5 1
 -3 1 0 23591.7 158.8 2
 -3 1 0 23186 104.1 4
 3 -1 0 23258 118.4 1
 3 -1 0 24162.6 111.8 1
 3 -1 0 23742.7 158.8 2
 3 -1 0 24131.8 155 3
 3 -1 0 23264.3 104.7 4
 -3 1 -1 3202.1 45.3 1
 -3 1 -1 2975.1 71 2
 -3 1 -1 2979.7 48.5 4
 3 -1 1 3219.7 45 1
 3 -1 1 3182.4 74.6 2
 3 -1 1 3153.3 70.4 3
 3 -1 1 3017.1 47.9 4
 -3 1 -2 59035.7 151.5 1
 -3 1 -2 55048.5 121.8 1
 -3 1 -2 56108.6 240.4 2
 -3 1 -2 56160.2 171.2 4
 3 -1 2 55826.5 119 1
 3 -1 2 56423.7 125.7 1
 3 -1 2 56675 242.2 3
 -3 1 -3 12397.7 121.4 2
 -3 1 -3 12577.2 92.4 4
 -3 1 -3 12659.9 114.3 5
 3 -1 3 12518.2 124.4 3
 -3 1 -4 44666.7 220.6 2
 -3 1 -4 44672.3 175.9 4
 -3 1 -4 44232.6 201.9 5
 3 -1 4 44249.8 226.9 3
 -3 1 -5 14471.8 133.7 2
 -3 1 -5 14300.3 110.8 4
 -3 1 -5 14579.9 122.1 5
 3 -1 5 14176.4 138.2 3
 -3 1 -6 483.83 54.359 2
 -3 1 -6 438.073 47.281 5
 3 -1 6 430.761 46.182 3
 -3 1 -7 1410 64.2 2
 -3 1 -7 1465.5 56.6 5
 3 -1 7 1378 67.7 3
 -3 1 -8 3943.1 75.8 5
 3 -1 8 3729.7 90.6 3
 -3 1 -9 11800.4 118.8 5
 3 -1 9 12125.2 146.2 3
 -3 1 -10 582.868 38.386 1
 -3 1 -10 570.586 38.806 1
 -3 1 -10 553.055 56.787 5
 3 -1 10 552.184 35.491 1
 3 -1 10 569.99 56.195 3
 3 -1 10 487.445 55.588 5
 -3 1 -11 -47.627 23.768 1
 -3 1 -11 -30.291 28.885 5
 3 -1 11 -7.183 23.778 1
 3 -1 11 -17.323 23.167 1
 3 -1 11 -24.129 44.333 3
 3 -1 11 2.911 29.22 5
 -3 1 -12 -29.557 27.879 1
 -3 1 -12 41.446 29.406 1
 -3 1 -12 30.568 32.7 5
 3 -1 12 55.007 26.851 1
 3 -1 12 36.064 27.748 1
 3 -1 12 21.653 45.599 3
 3 -1 12 25.724 32.26 5
 -3 1 -13 6.94 32.008 1
 -3 1 -13 44.361 36.191 5
 3 -1 13 18.995 25.45 1
 3 -1 13 9.434 31.713 1
 3 -1 13 38.729 48.873 3
 3 -1 13 81.28 34.478 5
 -3 1 -14 661.146 64.529 1
 -3 1 -14 844.743 74.862 5
 3 -1 14 8.674 20.249 1
 3 -1 14 613.896 61.826 1
 3 -1 14 638.246 68.233 3
 3 -1 14 787.764 70.273 5
 -3 1 -15 546.203 48.834 1
 -3 1 -15 472.408 46.983 1
 -3 1 -15 459.704 46.904 5
 3 -1 15 485.65 46.762 1
 3 -1 15 464.577 69.452 3
 3 -1 15 470.724 46.954 5
 -3 1 -16 -31.555 41.427 1
 -3 1 -16 21.305 42.366 1
 3 -1 16 -60.715 39.665 1
 3 -1 16 35.951 58.709 3
 3 -1 16 20.723 36.233 5
 -3 1 -17 401.745 52.09 1
 -3 1 -17 662.849 82.334 1
 3 -1 17 390.242 47.085 1
 3 -1 17 452.388 75.267 3
 3 -1 17 432.381 48.769 5
 -3 1 -18 787.383 88.158 1
 -3 1 -18 1060.7 92.2 1
 3 -1 18 846.734 79.403 1
 3 -1 18 816.583 82.313 1
 3 -1 18 806.743 88.354 3
 3 -1 18 834.414 86.633 5
 -3 1 -19 41.727 54.792 1
 -3 1 -19 -69.586 51.011 1
 3 -1 19 -101.122 50.629 1
 3 -1 19 -93.942 48.073 1
 3 -1 19 -37.043 70.956 3
 3 -1 19 129.802 47.825 5
 -3 0 20 -186.775 96.348 1
 -3 0 20 -157.884 102.435 1
 -3 0 20 28.095 79.872 5
 3 0 -20 -122.854 103.53 1
 3 0 -20 108.457 86.681 4
 -3 0 19 323.383 98.722 1
 -3 0 19 -89.943 97.482 1
 3 0 -19 164.099 93.358 1
 3 0 -19 58.457 99.78 1
 3 0 -19 162.599 82.885 4
 -3 0 18 296.804 89.386 1
 -3 0 18 114.546 90.748 1
 3 0 -18 476.079 94.113 1
 3 0 -18 239.981 88.666 1
 3 0 -18 298.575 77.151 4
 -3 0 17 118.593 82.231 1
 -3 0 17 83.861 80.825 1
 3 0 -17 52.832 78.38 1
 3 0 -17 -4.731 87.011 1
 3 0 -17 49.534 64.914 4
 -3 0 16 495.9 88.044 1
 -3 0 16 562.103 85.443 1
 3 0 -16 382.68 85.474 1
 3 0 -16 508.425 84.499 1
 3 0 -16 515.396 72.888 4
 -3 0 15 409.467 78.014 1
 -3 0 15 351.488 128.955 1
 3 0 -15 350.926 78.965 1
 3 0 -15 369.329 77.151 1
 3 0 -15 331.22 63.836 4
 -3 0 14 242.784 93.762 1
 -3 0 14 256.272 67.335 1
 3 0 -14 164.142 66.683 1
 3 0 -14 307.558 80.568 1
 3 0 -14 197.079 58.856 4
 -3 0 13 943.396 114.004 1
 -3 0 13 990.321 109.113 1
 3 0 -13 859.874 78.189 1
 3 0 -13 817.025 77.303 1
 3 0 -13 1175.4 98.7 4
 -3 0 12 5878.3 143.5 1
 -3 0 12 6230.8 143.4 1
 3 0 -12 5964.4 144 1
 3 0 -12 6197.1 144.1 1
 3 0 -12 5925.2 127.9 4
 -3 0 11 2.554 50.351 1
 -3 0 11 14.672 48.718 1
 3 0 -11 15.202 52.991 1
 3 0 -11 26.064 52.153 1
 3 0 -11 111.728 43.43 4
 -3 0 10 8237.1 138.4 1
 -3 0 10 8111.8 136.3 1
 3 0 -10 8268.2 139.7 1
 3 0 -10 8448.7 140 1
 3 0 -10 8686.3 137.4 2
 3 0 -10 8094.9 127.4 4
 -3 0 9 843.369 81.187 1
 -3 0 9 757.037 78.207 1
 3 0 -9 754.63 82.603 1
 3 0 -9 905.999 79.544 1
 3 0 -9 959.076 81.939 2
 3 0 -9 954.675 71.223 4
 -3 0 8 4942 105.4 1
 -3 0 8 4692.9 102.2 1
 3 0 -8 4629.7 102.9 1
 3 0 -8 4675.6 101.5 1
 3 0 -8 4880.3 104.4 2
 3 0 -8 4615.6 92.8 4
 -3 0 7 3600.3 90.9 1
 -3 0 7 3421.4 87 1
 3 0 -7 3486.6 89.7 1
 3 0 -7 3439.7 86.9 1
 3 0 -7 3678.7 91.7 2
 3 0 -7 3389.1 79.1 4
 -3 0 6 3757.2 85.1 1
 -3 0 6 3509.5 83.2 1
 3 0 -6 3506.1 84.3 1
 3 0 -6 3718.8 83.8 1
 3 0 -6 3770.5 86.3 2
 3 0 -6 3475.7 76.4 4
 -3 0 5 26.745 30.5 1
 -3 0 5 25.502 29.478 1
 3 0 -5 26.503 29.873 1
 3 0 -5 56.341 29.809 1
 3 0 -5 -5.332 36.141 2
 3 0 -5 34.834 26.535 4
 -3 0 4 7306.4 94.4 1
 -3 0 4 6937.4 92 1
 -3 0 4 6822.3 85.2 4
 3 0 -4 6896 91.2 1
 3 0 -4 7168 92.4 1
 3 0 -4 6972.8 100.5 2
 3 0 -4 6686.3 84.9 4
 -3 0 3 6287.7 83.9 1
 -3 0 3 6182.1 82.6 1
 -3 0 3 6021.5 79.2 4
 3 0 -3 5894.3 80.6 1
 3 0 -3 6221.6 82.1 1
 3 0 -3 6153.2 94.4 2
 3 0 -3 6243.7 92.3 3
 3 0 -3 5651.2 78.3 4
 -3 0 2 60831 205.3 1
 -3 0 2 59238.8 202.2 1
 -3 0 2 59591.3 250 2
 -3 0 2 58483.1 203.2 4
 3 0 -2 57626.9 198.4 1
 3 0 -2 59942.3 202.3 1
 3 0 -2 58409.9 246.8 2
 3 0 -2 61152.9 245.5 3
 3 0 -2 57245.3 201.5 4
 -3 0 1 15732.4 101.1 1
 -3 0 1 15038 98.2 1
 -3 0 1 15485.7 133.4 2
 -3 0 1 15347.2 106.8 4
 3 0 -1 14946.3 97.3 1
 3 0 -1 15479.5 99 1
 3 0 -1 15415.8 132.6 2
 3 0 -1 15763.3 132.5 3
 3 0 -1 14854.8 106.6 4
 -3 0 0 8866.7 71.4 1
 -3 0 0 8442.8 69.6 1
 -3 0 0 8314.8 101 2
 -3 0 0 8385.5 82 4
 3 0 0 8551.3 69 1
 3 0 0 8505 102.3 2
 3 0 0 8551.6 102.4 3
 3 0 0 8234.3 83.4 4
 -3 0 -1 29006.5 102.5 1
 -3 0 -1 29841.1 175.4 2
 -3 0 -1 28807.4 143.7 4
 3 0 1 7566.1 56.8 1
 3 0 1 29635.8 101.1 1
 3 0 1 29283.6 172.6 2
 3 0 1 29470.6 177.9 3
 3 0 1 28397.9 143.1 4
 -3 0 -2 416.754 51.62 2
 -3 0 -2 626.772 44.05 4
 3 0 2 453.065 53.35 2
 3 0 2 520.089 54.606 3
 3 0 2 547.009 43.678 4
 -3 0 -3 4786.3 81.3 2
 -3 0 -3 4891.5 72.9 4
 3 0 3 4777.2 88 3
 -3 0 -4 3254.7 73.2 2
 -3 0 -4 2967.8 65.7 4
 -3 0 -4 3065.8 60.9 5
 3 0 4 3055.5 77.2 3
 -3 0 -5 15550.2 131.9 2
 -3 0 -5 15906.6 130 4
 -3 0 -5 15602.5 114.3 5
 3 0 5 15703.2 146.2 3
 -3 0 -6 24807.8 166.5 2
 -3 0 -6 24873.5 166.6 4
 -3 0 -6 24055.1 139.6 5
 3 0 6 24555 183.3 3
 -3 0 -7 24520.3 169.4 2
 -3 0 -7 24213.2 172.9 4
 -3 0 -7 23321.1 138.7 5
 3 0 7 23661 185.2 3
 -3 0 -8 42.713 36.895 2
 -3 0 -8 -24.29 28.806 4
 -3 0 -8 19.636 22.121 5
 3 0 8 -3.908 39.038 3
 -3 0 -9 2573.4 41.6 1
 -3 0 -9 2559 79.5 2
 -3 0 -9 2553.2 62.4 5
 3 0 9 2464.7 87.6 3
 -3 0 -10 434.415 38.876 1
 -3 0 -10 427.362 40.473 1
 -3 0 -10 593.658 56.823 2
 -3 0 -10 386.877 33.127 5
 3 0 10 518.149 60.6 3
 -3 0 -11 3289.7 60.8 1
 -3 0 -11 3435.4 63 1
 -3 0 -11 3453.8 75.5 5
 3 0 11 3339.5 58.4 1
 3 0 11 3157 104.5 3
 -3 0 -12 1212.5 58.7 1
 -3 0 -12 1218.1 59.9 1
 -3 0 -12 1305 65.7 5
 3 0 12 1189.7 56 1
 3 0 12 1247.6 90.6 3
 -3 0 -13 2250.1 72 1
 -3 0 -13 2090.5 95.2 1
 -3 0 -13 2526 76 5
 3 0 13 2141.6 67.6 1
 3 0 13 2356.4 104.6 3
 -3 0 -14 -99.423 36.5 1
 3 0 14 62.682 20.564 1
 3 0 14 -22.515 55.336 3
 -3 0 -15 1295.7 75.5 1
 -3 0 -15 1377.4 75.3 1
 3 0 15 1192.9 71.2 1
 3 0 15 1344.1 101.5 3
 -3 0 -16 690.758 61.559 1
 -3 0 -16 539.113 50.619 1
 3 0 16 397.708 82.957 1
 3 0 16 570.113 76.263 3
 -3 0 -17 88.344 47.492 1
 -3 0 -17 28.614 45.309 1
 3 0 17 46.72 41.694 1
 3 0 17 107.258 68.834 3
 -3 0 -18 14.188 49.458 1
 -3 0 -18 -71.945 46.878 1
 3 0 18 -85.976 41.823 1
 3 0 18 -40.955 70.282 3
 -3 0 -19 95.054 55.96 1
 -3 0 -19 -29.311 53.343 1
 3 0 19 -8.189 70.146 1
 3 0 19 -44.125 50.431 1
 3 0 19 194.392 79.95 3
 -3 -1 21 -151.319 115.763 1
 -3 -1 20 -36.477 103.506 1
 -3 -1 20 -94.177 100.159 1
 -3 -1 20 -54.738 78.794 5
 3 1 -20 -24.244 97.487 1
 3 1 -20 60.424 109.991 1
 3 1 -20 -46.666 70.84 4
 -3 -1 19 177.196 96.391 1
 -3 -1 19 266.55 96.94 1
 -3 -1 19 186.529 78.176 5
 3 1 -19 74.685 87.533 1
 3 1 -19 -43.701 94.631 1
 3 1 -19 42.383 67.421 4
 -3 -1 18 120.402 84.68 1
 -3 -1 18 134.281 85.503 1
 -3 -1 18 1.352 67.479 5
 3 1 -18 117.658 85.247 1
 3 1 -18 61.772 77.548 1
 3 1 -18 31.495 61.171 4
 -3 -1 17 975.267 101.817 1
 -3 -1 17 1346.4 146.4 1
 3 1 -17 919.672 96.431 1
 3 1 -17 1039.1 93.8 1
 3 1 -17 1098.4 131.9 4
 -3 -1 16 -32.962 70.879 1
 -3 -1 16 -7.295 73.561 1
 3 1 -16 -79.533 67.034 1
 3 1 -16 -36.436 65.027 1
 3 1 -16 95.79 56.47 4
 -3 -1 15 138.385 67.07 1
 -3 -1 15 -162.732 126.493 1
 3 1 -15 51.167 71.262 1
 3 1 -15 60.858 65.647 1
 3 1 -15 116.942 55.341 4
 -3 -1 14 156.615 73.235 1
 -3 -1 14 220.229 66.302 1
 3 1 -14 301.88 70.22 1
 3 1 -14 145.48 106.271 1
 3 1 -14 273.176 93.791 4
 -3 -1 13 -76.367 50.734 1
 -3 -1 13 -52.42 57.445 1
 3 1 -13 6.075 59.172 1
 3 1 -13 -35.405 53.902 1
 3 1 -13 19.913 47.472 4
 -3 -1 12 -70.878 51.252 1
 -3 -1 12 -100.122 50.601 1
 3 1 -12 -145.632 52.731 1
 3 1 -12 -69.027 48.576 1
 3 1 -12 -25.51 44.128 4
 -3 -1 11 1423.9 99 1
 -3 -1 11 1423.2 100.2 1
 3 1 -11 1493.5 101.2 1
 3 1 -11 1377 100.1 1
 3 1 -11 1621.1 92.1 4
 -3 -1 10 676.447 59.553 1
 -3 -1 10 736.529 63.418 1
 3 1 -10 813.248 69.098 1
 3 1 -10 783.46 64.179 1
 3 1 -10 788.508 77.126 4
 -3 -1 9 -38.216 38.247 1
 -3 -1 9 -33.909 39.449 1
 3 1 -9 -48.683 35.608 1
 3 1 -9 -31.015 39.818 1
 3 1 -9 14.453 35.145 4
 -3 -1 8 320.038 44.396 1
 -3 -1 8 262.393 45.195 1
 3 1 -8 269.279 45.214 1
 3 1 -8 315.881 44.352 1
 3 1 -8 243.425 38.555 4
 -3 -1 7 10904.3 131.8 1
 -3 -1 7 10472.2 128.3 1
 3 1 -7 10454.5 128.6 1
 3 1 -7 10589.5 127.2 1
 3 1 -7 10831.9 134 2
 3 1 -7 10197.4 122.2 4
 -3 -1 6 277.939 38.137 1
 -3 -1 6 358.367 41.075 1
 -3 -1 6 233.474 35.429 4
 3 1 -6 291.585 37.657 1
 3 1 -6 307.511 38.655 1
 3 1 -6 392.195 47.749 2
 3 1 -6 223.536 32.939 4
 -3 -1 5 3579.3 79.8 1
 -3 -1 5 3290 78.4 1
 -3 -1 5 3262.6 77.8 4
 3 1 -5 3196.7 78.2 1
 3 1 -5 3505.2 77 1
 3 1 -5 3435.9 85.2 2
 3 1 -5 3089.6 75.1 4
 -3 -1 4 5793.3 88.3 1
 -3 -1 4 5617.9 87.6 1
 -3 -1 4 5461.2 87 4
 3 1 -4 5639.2 87.6 1
 3 1 -4 5585.5 85.6 1
 3 1 -4 5696 95 2
 3 1 -4 5487.6 87.3 4
 -3 -1 3 3164.6 69.1 1
 -3 -1 3 2944.9 72.5 4
 3 1 -3 2956.9 68 1
 3 1 -3 3130 68.4 1
 3 1 -3 3093.1 75 2
 3 1 -3 2921.6 71.4 4
 -3 -1 2 8958.9 90.3 1
 -3 -1 2 9150.4 92 1
 -3 -1 2 8585 99.7 4
 3 1 -2 8904.2 91 1
 3 1 -2 9081.5 91.8 1
 3 1 -2 9253.1 109.3 2
 3 1 -2 9510.2 113.5 3
 3 1 -2 8615 100.3 4
 -3 -1 1 33885.1 151 1
 -3 -1 1 35035.6 153.7 1
 -3 -1 1 34235.2 178.7 4
 3 1 -1 34215.2 151 1
 3 1 -1 34521.6 151.7 1
 3 1 -1 34323 190.6 2
 3 1 -1 35223.7 200.4 3
 3 1 -1 33682 178.3 4
 -3 -1 0 77300.6 208 1
 -3 -1 0 80570.2 211.8 1
 -3 -1 0 81149.4 284.8 2
 -3 -1 0 78398.4 265.5 4
 3 1 0 78024.5 245.6 1
 3 1 0 79655 227.6 1
 3 1 0 80574.6 283.2 2
 3 1 0 79990.1 297.4 3
 3 1 0 77363.6 264.5 4
 -3 -1 -1 24653.6 111.1 1
 -3 -1 -1 25482.8 112.6 1
 -3 -1 -1 25722.4 164.1 2
 -3 -1 -1 25670 158.5 4
 3 1 1 25233 110 1
 3 1 1 25732 163.1 2
 3 1 1 25700.5 175.8 3
 3 1 1 24634.5 155.8 4
 -3 -1 -2 89436.7 241.2 1
 -3 -1 -2 84786.4 310.5 1
 -3 -1 -2 91900.4 295.8 2
 -3 -1 -2 90572 294.4 4
 3 1 2 39569.2 122.7 1
 3 1 2 88978.9 222.2 1
 3 1 2 90096.1 335.3 2
 3 1 2 89149.5 319 3
 3 1 2 88090.4 290.9 4
 -3 -1 -3 3649.9 43.3 1
 -3 -1 -3 3662.1 44.3 1
 -3 -1 -3 3619.5 74.3 2
 -3 -1 -3 3740.8 77.3 4
 3 1 3 3680.3 42.1 1
 3 1 3 3498.2 40.6 1
 3 1 3 3592 75.2 2
 3 1 3 3780.2 82.6 3
 -3 -1 -4 818.894 54.507 2
 -3 -1 -4 741.388 57.339 4
 3 1 4 784.877 59.555 3
 -3 -1 -5 12280.8 115.6 2
 -3 -1 -5 12400.5 129.2 4
 -3 -1 -5 12171.7 92.6 5
 3 1 5 12257.4 133 3
 -3 -1 -6 3983.2 77 2
 -3 -1 -6 3912.4 87 4
 -3 -1 -6 3853.8 58.8 5
 3 1 6 3863.3 90.6 3
 -3 -1 -7 8025.5 58.7 1
 -3 -1 -7 8195.6 103.2 2
 -3 -1 -7 7963.9 117.4 4
 -3 -1 -7 7742.8 75.7 5
 3 1 7 8080.4 118.8 3
 -3 -1 -8 1846.8 45.3 1
 -3 -1 -8 1954.5 45.2 1
 -3 -1 -8 2029.1 71.1 2
 -3 -1 -8 2034.3 83.5 4
 -3 -1 -8 1809.8 49.4 5
 3 1 8 1809.6 39.5 1
 3 1 8 2096.7 84.6 3
 -3 -1 -9 10685.7 82.2 1
 -3 -1 -9 10893.9 82.3 1
 -3 -1 -9 10887.2 122 2
 -3 -1 -9 11013.2 148.7 4
 -3 -1 -9 10198.7 86.6 5
 3 1 9 10801.9 78.7 1
 3 1 9 10854.3 79.2 1
 3 1 9 10761.5 143.4 3
 -3 -1 -10 1436.3 54.8 1
 -3 -1 -10 1486 55.4 1
 -3 -1 -10 1412 74.8 2
 -3 -1 -10 1482.4 93.3 4
 -3 -1 -10 1297.4 51.9 5
 3 1 10 1357.2 52.9 1
 3 1 10 1446 51.7 1
 3 1 10 1443.6 89.9 3
 -3 -1 -11 472.64 56.486 1
 -3 -1 -11 637.344 59.468 1
 -3 -1 -11 665.881 74.526 2
 -3 -1 -11 598.91 63.045 4
 -3 -1 -11 624.031 49.041 5
 3 1 11 674.106 41.828 1
 3 1 11 593.804 38.022 1
 3 1 11 641.468 69.219 3
 -3 -1 -12 19368.7 136.1 1
 -3 -1 -12 19553.5 170.2 2
 3 1 12 18780.2 129.7 1
 3 1 12 13560.1 107.9 1
 3 1 12 18924.9 199.4 3
 -3 -1 -13 6718.4 101.7 1
 -3 -1 -13 7286.1 125.5 2
 3 1 13 6603.9 96.7 1
 3 1 13 6709.8 144 3
 -3 -1 -14 664.144 53.424 1
 -3 -1 -14 657.167 53.508 1
 -3 -1 -14 788.815 86.713 2
 3 1 14 755.9 52.803 1
 3 1 14 735.279 78.611 3
 -3 -1 -15 655.345 78.277 1
 -3 -1 -15 715.804 81.002 1
 -3 -1 -15 914.633 91.382 2
 3 1 15 752.937 55.583 1
 3 1 15 867.583 83.252 3
 -3 -1 -16 718.643 59.633 1
 -3 -1 -16 691.577 59.178 1
 -3 -1 -16 1029.3 96.8 2
 3 1 16 597.273 53.23 1
 3 1 16 698.213 82.053 3
 -3 -1 -17 -45.037 47.499 1
 -3 -1 -17 -60.651 51.018 1
 -3 -1 -17 129.032 56.978 2
 3 1 17 0.272 68.677 3
 -3 -1 -18 -34.408 53.468 1
 -3 -1 -18 -98.185 54.925 1
 -3 -1 -18 40.26 59.15 2
 3 1 18 -123.633 47.12 1
 3 1 18 -53.369 72.686 3
 -3 -1 -19 -35.874 56.38 1
 -3 -1 -19 107.434 63.303 1
 -3 -1 -19 138.998 68.123 2
 3 1 19 -147.808 50.914 1
 3 1 19 54.257 82.358 3
 -3 -2 20 -18.262 84.185 1
 -3 -2 20 -136.597 92.29 1
 -3 -2 20 -126.115 72.7 5
 3 2 -20 94.591 101.843 1
 3 2 -20 -5.935 102.14 1
 3 2 -20 -78.816 84.269 4
 -3 -2 19 122.518 87.329 1
 -3 -2 19 243.672 76.066 5
 3 2 -19 127.883 94.475 1
 3 2 -19 140.191 93.092 1
 3 2 -19 60.708 74.175 4
 -3 -2 18 1603.2 158.3 1
 -3 -2 18 1992.1 145.5 5
 3 2 -18 1733.4 164.4 1
 3 2 -18 1848.1 165.8 1
 3 2 -18 1534.2 148.7 4
 -3 -2 17 73.737 76.199 1
 -3 -2 17 88.107 65.01 5
 3 2 -17 120.888 85.358 1
 3 2 -17 4.101 77.581 1
 3 2 -17 179.864 70.257 4
 -3 -2 16 1964.6 138.6 1
 -3 -2 16 1561 129 5
 3 2 -16 1821.6 140.1 1
 3 2 -16 1954.5 140.2 1
 3 2 -16 1622.5 130.9 4
 -3 -2 15 773.329 83.447 1
 3 2 -15 958.797 94.781 1
 3 2 -15 798.642 82.943 1
 3 2 -15 628.695 69.81 4
 -3 -2 14 895.364 134.957 1
 3 2 -14 1221.3 121.1 1
 3 2 -14 945.976 112.484 1
 3 2 -14 927.253 107.806 4
 -3 -2 13 47.965 52.298 1
 3 2 -13 5.045 59.733 1
 3 2 -13 -55.283 51.24 1
 3 2 -13 15.046 61.068 4
 -3 -2 12 131.075 52.757 1
 3 2 -12 150.954 52.136 1
 3 2 -12 182.162 56.067 1
 3 2 -12 126.449 50.962 4
 -3 -2 11 6213.2 134.1 1
 3 2 -11 6175.6 135.7 1
 3 2 -11 6277 136.5 1
 3 2 -11 6035.5 130.8 4
 -3 -2 10 138.976 46.649 1
 3 2 -10 -1.13 45.136 1
 3 2 -10 115.802 46.128 1
 3 2 -10 40.891 42.909 4
 -3 -2 9 205.691 43.41 1
 -3 -2 9 209.093 47.137 1
 3 2 -9 218.358 48.294 1
 3 2 -9 191.266 43.312 1
 3 2 -9 242.983 44.868 4
 -3 -2 8 22.261 38.531 1
 -3 -2 8 54.352 40.323 1
 3 2 -8 35.339 39.933 1
 3 2 -8 51.33 37.47 1
 3 2 -8 104.49 33.602 4
 -3 -2 7 3452.5 89.9 1
 -3 -2 7 3444.5 90.2 1
 -3 -2 7 3376.4 89.7 4
 3 2 -7 3462.4 93 1
 3 2 -7 3453.9 90.7 1
 3 2 -7 3294.4 88.5 4
 -3 -2 6 742.485 63.233 1
 -3 -2 6 815.205 65.08 1
 -3 -2 6 968.316 69.106 4
 3 2 -6 882.669 68.732 1
 3 2 -6 829.139 65.865 1
 3 2 -6 821.465 64.937 4
 -3 -2 5 2518.7 76.4 1
 -3 -2 5 2577.1 75.3 1
 -3 -2 5 2452.2 77.2 4
 3 2 -5 2455.6 76.3 1
 3 2 -5 2477.5 75.2 1
 3 2 -5 2652.5 82 2
 3 2 -5 2441 76.4 4
 -3 -2 4 798.072 56.835 1
 -3 -2 4 852.516 57.806 1
 -3 -2 4 826.296 63.18 4
 3 2 -4 764.209 57.828 1
 3 2 -4 861.402 56.367 1
 3 2 -4 893.719 67.851 2
 3 2 -4 746.304 60.651 4
 -3 -2 3 810.064 54.928 1
 -3 -2 3 922.084 54.921 1
 -3 -2 3 709.253 62.26 4
 3 2 -3 824.738 56.815 1
 3 2 -3 870.312 54.997 1
 3 2 -3 955.222 63.508 2
 3 2 -3 902.596 62.965 4
 -3 -2 2 234.747 32.144 1
 -3 -2 2 307.199 33.193 1
 -3 -2 2 165.842 33.871 4
 3 2 -2 254.733 33.032 1
 3 2 -2 262.336 32.3 1
 3 2 -2 258.07 37.567 2
 3 2 -2 149.518 31.508 4
 -3 -2 1 10193.3 99.6 1
 -3 -2 1 10341.8 99.3 1
 -3 -2 1 10298.3 117.9 4
 3 2 -1 10144.7 99.2 1
 3 2 -1 10277 98.5 1
 3 2 -1 10360.8 113.9 2
 3 2 -1 10354.2 117.7 4
 -3 -2 0 16294.3 114.7 1
 -3 -2 0 16436.5 115.6 1
 -3 -2 0 16425.5 143.9 4
 3 2 0 16005.2 112.6 1
 3 2 0 16759 115.4 1
 3 2 0 16585.8 136.5 2
 3 2 0 16888.6 152.1 3
 3 2 0 16393.1 143.2 4
 -3 -2 -1 5520.8 72 1
 -3 -2 -1 5487.8 71 1
 -3 -2 -1 5402.5 93.9 4
 3 2 1 5481.8 69.7 1
 3 2 1 5375.4 70.1 1
 3 2 1 5469.9 87.1 2
 3 2 1 5465 98 3
 3 2 1 5188 90.1 4
 -3 -2 -2 3865.8 61.2 1
 -3 -2 -2 3963.8 61 1
 -3 -2 -2 4317 80.4 2
 -3 -2 -2 3976.9 86 4
 3 2 2 3944.1 60.4 1
 3 2 2 3717 73.8 1
 3 2 2 3993.3 76.7 2
 3 2 2 4054.6 88.1 3
 3 2 2 3813.1 83.2 4
 -3 -2 -3 1293 45.4 1
 -3 -2 -3 1294.7 44.6 1
 -3 -2 -3 1223.3 58.4 2
 -3 -2 -3 1399 69.7 4
 3 2 3 1352.6 44.6 1
 3 2 3 1349.9 56.2 2
 3 2 3 1213.6 66.9 3
 3 2 3 1241.1 63.8 4
 -3 -2 -4 177.983 24.216 1
 -3 -2 -4 138.86 25.582 1
 -3 -2 -4 157.178 33.629 2
 -3 -2 -4 131.038 35.4 4
 3 2 4 216.115 24.712 1
 3 2 4 120.791 31.784 2
 3 2 4 160.504 40.775 3
 -3 -2 -5 610.092 40.965 1
 -3 -2 -5 609.451 52.329 2
 -3 -2 -5 546.274 67.101 4
 -3 -2 -5 539.003 35.745 5
 3 2 5 570.81 40.986 1
 3 2 5 -6.65 11.03 1
 3 2 5 547.952 50.144 3
 -3 -2 -6 1310.3 46.5 1
 -3 -2 -6 1458.5 62.4 2
 -3 -2 -6 1278 78 4
 -3 -2 -6 1389.8 38.2 5
 3 2 6 1401.3 47.3 1
 3 2 6 101.209 14.58 1
 3 2 6 1355.4 71.2 3
 -3 -2 -7 2676.5 57.1 1
 -3 -2 -7 2685.1 72.5 2
 -3 -2 -7 2613.5 93.2 4
 3 2 7 2624.3 56.7 1
 3 2 7 517.11 29.994 1
 3 2 7 2593 87.2 3
 -3 -2 -8 35735.6 158.3 1
 -3 -2 -8 36705.6 191.8 2
 -3 -2 -8 35868.4 254.1 4
 3 2 8 35019.6 152.9 1
 3 2 8 35242.9 234.1 3
 -3 -2 -9 768.396 59.18 1
 -3 -2 -9 710.51 66.07 2
 -3 -2 -9 879.507 96.878 4
 3 2 9 700.613 53.276 1
 3 2 9 40.626 17.345 1
 3 2 9 862.38 83.361 3
 -3 -2 -10 32319.1 167.7 1
 -3 -2 -10 30453.4 214 1
 -3 -2 -10 32097.5 187.2 2
 -3 -2 -10 31508.6 258.7 4
 3 2 10 31197.7 159.7 1
 3 2 10 547.218 54.736 1
 3 2 10 31510 234.6 3
 -3 -2 -11 25918.6 161 1
 -3 -2 -11 24921.9 158.1 1
 -3 -2 -11 26138 176.8 2
 -3 -2 -11 25117.5 296.5 4
 3 2 11 25208.3 154.4 1
 3 2 11 24749.3 216.4 3
 -3 -2 -12 6940 104.6 1
 -3 -2 -12 7119.8 104.5 1
 -3 -2 -12 6785 112.6 2
 -3 -2 -12 6889.4 161.1 4
 3 2 12 6798.1 102.3 1
 3 2 12 6525.4 137.8 3
 -3 -2 -13 8219.1 118.1 1
 -3 -2 -13 8072.1 116.4 1
 -3 -2 -13 8173.2 124 2
 -3 -2 -13 8141.9 177.5 4
 3 2 13 7801.1 112.1 1
 3 2 13 7926.1 149.9 3
 -3 -2 -14 2115 93.5 1
 -3 -2 -14 2081.8 93.9 1
 -3 -2 -14 2071.7 95.3 2
 -3 -2 -14 2219.8 139.7 4
 3 2 14 2080.2 105.8 1
 3 2 14 2201.2 115.8 3
 -3 -2 -15 -36.049 48.492 1
 -3 -2 -15 -138.21 46.872 1
 -3 -2 -15 -16.778 47.363 2
 -3 -2 -15 0.207 68.254 4
 3 2 15 -42.095 43.549 1
 3 2 15 -32.759 63.961 3
 -3 -2 -16 935.404 95.997 1
 -3 -2 -16 750.313 67.898 1
 -3 -2 -16 991.55 91.664 2
 -3 -2 -16 918.253 95.482 4
 3 2 16 761.884 92.041 1
 3 2 16 959.09 95.705 1
 3 2 16 902.882 89.536 3
 -3 -2 -17 47.701 56.959 1
 -3 -2 -17 -18.877 57.443 1
 -3 -2 -17 307.351 58.996 2
 -3 -2 -17 148.037 77.914 4
 3 2 17 20.556 54.436 1
 3 2 17 219.764 55.601 1
 3 2 17 189.018 74.636 3
 -3 -2 -18 806.648 73.862 1
 -3 -2 -18 741.305 73.442 1
 -3 -2 -18 976.131 104.771 2
 -3 -2 -18 819.027 96.415 4
 3 2 18 964.615 109.172 1
 3 2 18 727.342 72.562 1
 3 2 18 1183 123.9 3
 -3 -3 20 -47.946 93.678 1
 -3 -3 20 41.294 103.287 1
 -3 -3 20 -81.169 78.892 5
 3 3 -20 221.538 102.402 1
 3 3 -20 50.492 94.304 1
 3 3 -20 0.238 86.396 4
 -3 -3 19 -168.264 84.602 1
 -3 -3 19 -10.399 83.571 1
 -3 -3 19 38.069 74.719 5
 3 3 -19 5.339 89.809 1
 3 3 -19 -20.273 95.342 1
 3 3 -19 107.668 75.237 4
 -3 -3 18 33.657 73.911 1
 -3 -3 18 -0.712 78.565 1
 -3 -3 18 -88.784 66.557 5
 3 3 -18 57.35 85.306 1
 3 3 -18 152.413 77.013 4
 -3 -3 17 269.833 82.584 1
 -3 -3 17 274.372 80.827 1
 -3 -3 17 267.535 69.849 5
 3 3 -17 477.106 89.18 1
 3 3 -17 470.873 90.683 1
 3 3 -17 301.544 73.873 4
 -3 -3 16 2933.8 145.7 1
 -3 -3 16 3111 151.8 1
 -3 -3 16 2729.3 142.2 5
 3 3 -16 3202.3 161.8 1
 3 3 -16 3200.4 150.8 1
 3 3 -16 3049.6 152.2 4
 -3 -3 15 285.581 75.743 1
 -3 -3 15 149.799 66.561 1
 -3 -3 15 157.88 62.285 5
 3 3 -15 346.973 75.838 1
 3 3 -15 159.521 68.063 1
 3 3 -15 222.203 66.399 4
 -3 -3 14 445.92 65.71 1
 -3 -3 14 510.71 73.877 1
 -3 -3 14 410.056 65.007 5
 3 3 -14 380.497 105.755 1
 3 3 -14 622.216 76.165 1
 3 3 -14 487.835 68.011 4
 -3 -3 13 2619.5 134.1 1
 -3 -3 13 2960.7 128.9 1
 3 3 -13 2788.6 130.5 1
 3 3 -13 2721 126.2 1
 3 3 -13 2681.7 122.2 4
 -3 -3 12 2016.7 112 1
 -3 -3 12 2078.7 116.8 1
 3 3 -12 2231.9 121.6 1
 3 3 -12 1923.5 132.8 1
 3 3 -12 1933.8 147.8 4
 -3 -3 11 4218.1 124.3 1
 -3 -3 11 4268.6 127.5 1
 3 3 -11 4513 131.1 1
 3 3 -11 4482.7 129 1
 3 3 -11 4192.9 123.9 4
 -3 -3 10 5843.6 130.1 1
 -3 -3 10 5938.7 132.3 1
 3 3 -10 5782.8 132.9 1
 3 3 -10 6002.9 133.5 1
 3 3 -10 5410.1 125.6 4
 -3 -3 9 5007.2 117.7 1
 -3 -3 9 4881.3 118.2 1
 -3 -3 9 4952.3 117.8 4
 3 3 -9 5007 120 1
 3 3 -9 4955.9 117.8 1
 3 3 -9 4846 115.2 4
 -3 -3 8 275.794 46.989 1
 -3 -3 8 264.325 46.548 1
 -3 -3 8 151.242 40.296 4
 3 3 -8 248.79 47.786 1
 3 3 -8 295.564 46.967 1
 3 3 -8 217.445 45.728 4
 -3 -3 7 5202.7 107.2 1
 -3 -3 7 5366 109.2 1
 -3 -3 7 5102 111.5 4
 3 3 -7 5399.8 110.9 1
 3 3 -7 5148.2 105.1 1
 3 3 -7 5157.8 110 4
 -3 -3 6 134.499 34.897 1
 -3 -3 6 132.031 36.819 1
 -3 -3 6 146.127 36.107 4
 3 3 -6 177.536 41.481 1
 3 3 -6 95.253 36.143 1
 3 3 -6 85.816 38.168 4
 -3 -3 5 932.116 68.11 1
 -3 -3 5 957.204 68.606 1
 -3 -3 5 868.601 72.19 4
 3 3 -5 945.635 70.77 1
 3 3 -5 1026.2 66.2 1
 3 3 -5 976.456 72.507 4
 -3 -3 4 2461.1 78.4 1
 -3 -3 4 2392.7 76.2 1
 -3 -3 4 2113.2 80.4 4
 3 3 -4 2391.7 80.1 1
 3 3 -4 2317.6 75.3 1
 3 3 -4 2488.7 82 2
 3 3 -4 2268.5 84.2 4
 -3 -3 3 8598.9 111.9 1
 -3 -3 3 8677.9 111.9 1
 -3 -3 3 8721.1 122.2 4
 3 3 -3 8462.4 112 1
 3 3 -3 8603 110.8 1
 3 3 -3 8781.3 119.2 2
 3 3 -3 8397.7 121 4
 -3 -3 2 68.508 32.901 1
 -3 -3 2 75.151 30.664 1
 -3 -3 2 103.667 35.184 4
 3 3 -2 106.288 32.694 1
 3 3 -2 66.694 37.057 2
 3 3 -2 29.801 32.608 4
 -3 -3 1 2430 69.3 1
 -3 -3 1 2389.3 68.8 1
 -3 -3 1 2326.3 80.6 4
 3 3 -1 2369.9 68.6 1
 3 3 -1 2376.3 68.1 1
 3 3 -1 2314 71.3 2
 3 3 -1 2457.8 82 4
 -3 -3 0 712.07 54.946 1
 -3 -3 0 693.107 52.667 1
 -3 -3 0 670.03 65.829 4
 3 3 0 762.988 52.875 1
 3 3 0 632.726 55.017 1
 3 3 0 607.262 57.218 2
 3 3 0 597.145 63.49 4
 -3 -3 -1 3107.3 69.3 1
 -3 -3 -1 3137.3 68.7 1
 -3 -3 -1 3287.5 88.9 4
 3 3 1 3158.9 69.4 1
 3 3 1 3170.9 71.8 1
 3 3 1 3097.1 74 2
 3 3 1 3091.3 85.7 4
 -3 -3 -2 2801.9 67 1
 -3 -3 -2 3002.3 68 1
 -3 -3 -2 2904.8 87.3 4
 3 3 2 2907 67.2 1
 3 3 2 2880 64.9 1
 3 3 2 2827.7 70.6 2
 3 3 2 2987.6 87.9 3
 3 3 2 2885 85.3 4
 -3 -3 -3 710.039 52.745 1
 -3 -3 -3 753.307 52.987 1
 -3 -3 -3 705.447 71.62 4
 3 3 3 791.05 54.673 1
 3 3 3 850.426 53.068 1
 3 3 3 682.815 52.093 2
 3 3 3 768.556 68.445 3
 3 3 3 699.105 66.227 4
 -3 -3 -4 364.168 34.932 1
 -3 -3 -4 418.958 50.459 1
 -3 -3 -4 298.002 43.885 4
 3 3 4 442.955 52.155 1
 3 3 4 354.482 33.952 1
 3 3 4 412.545 39.629 2
 3 3 4 439.165 51.664 3
 -3 -3 -5 1335.9 59.4 1
 -3 -3 -5 1323.4 57 1
 -3 -3 -5 1360.6 84.2 4
 3 3 5 1303.7 58.6 1
 3 3 5 1335.7 57.2 1
 3 3 5 1185.7 76.4 3
 -3 -3 -6 53.672 30.168 1
 -3 -3 -6 11.005 27.981 1
 -3 -3 -6 -44.756 39.327 4
 3 3 6 46.148 30.017 1
 3 3 6 41.957 29.375 1
 3 3 6 1.111 44.667 3
 -3 -3 -7 3412.3 75.4 1
 -3 -3 -7 3513 75.6 1
 -3 -3 -7 3401.9 80.8 2
 -3 -3 -7 3180.9 111.5 4
 3 3 7 3444.5 76.4 1
 3 3 7 3457.3 73.7 1
 3 3 7 3366.9 100.6 3
 -3 -3 -8 72.836 34.571 1
 -3 -3 -8 125.342 35.12 1
 -3 -3 -8 62.533 40.501 2
 -3 -3 -8 -43.561 48.284 4
 3 3 8 86.423 35.72 1
 3 3 8 82.985 33.229 1
 3 3 8 2.167 47.417 3
 -3 -3 -9 1130.8 70.4 1
 -3 -3 -9 1289.7 71 1
 -3 -3 -9 1181.6 71.3 2
 -3 -3 -9 1049.9 106.6 4
 3 3 9 1138 64.5 1
 3 3 9 1196.5 65.2 1
 3 3 9 1055.3 87.5 3
 -3 -3 -10 26.297 36.283 1
 -3 -3 -10 54.291 38.702 1
 -3 -3 -10 32.669 38.481 2
 -3 -3 -10 -128.51 50.396 4
 3 3 10 -12.418 34.718 1
 3 3 10 69.727 37.765 1
 3 3 10 68.488 52.886 3
 -3 -3 -11 650.018 76.387 1
 -3 -3 -11 450.817 50.609 1
 -3 -3 -11 663.834 71.295 2
 -3 -3 -11 369.271 68.42 4
 3 3 11 396.821 45.74 1
 3 3 11 739.899 76.037 1
 3 3 11 416.902 61.524 3
 -3 -3 -12 201.78 47.881 1
 -3 -3 -12 226.634 47.686 1
 -3 -3 -12 212.487 45.451 2
 -3 -3 -12 18.73 61.845 4
 3 3 12 293.622 46.619 1
 3 3 12 171.502 50.194 1
 3 3 12 183.928 61.411 3
 -3 -3 -13 2002.2 118.8 1
 -3 -3 -13 2209.7 92.5 1
 -3 -3 -13 2283.2 87.5 2
 -3 -3 -13 2221.2 147.2 4
 3 3 13 2283.2 91.1 1
 3 3 13 2404.4 100.8 1
 3 3 13 2344.2 112.6 3
 -3 -3 -14 3540.1 112.6 1
 -3 -3 -14 3579.3 106.6 1
 -3 -3 -14 3887.2 165.8 4
 3 3 14 3349.1 105.3 1
 3 3 14 3506.9 113.4 1
 3 3 14 3723.4 127.7 3
 -3 -3 -15 608.788 64.038 1
 -3 -3 -15 606.83 62.58 1
 -3 -3 -15 617.329 91.775 4
 3 3 15 579.711 62.078 1
 3 3 15 903.915 102.518 1
 3 3 15 761.375 83.261 3
 -3 -3 -16 108.977 59.373 1
 -3 -3 -16 -78.346 52.387 1
 -3 -3 -16 -142.968 76.373 4
 3 3 16 -122.582 51.771 1
 3 3 16 -117.857 59.884 1
 3 3 16 -36.822 67.006 3
 -3 -3 -17 197.344 65.701 1
 -3 -3 -17 293.177 63.181 1
 -3 -3 -17 -56.35 86.954 4
 3 3 17 119.951 59.555 1
 3 3 17 174.677 63.257 1
 3 3 17 328.741 82.46 3
 -3 -4 19 -210.014 84.862 1
 -3 -4 19 -124.345 85.331 1
 -3 -4 19 -228.05 76.839 5
 3 4 -19 0.667 90.624 1
 3 4 -19 -171.375 101.439 1
 3 4 -19 -206.085 79.529 4
 -3 -4 18 32.491 76.727 1
 -3 -4 18 -32.432 79.786 1
 -3 -4 18 225.738 79.696 5
 3 4 -18 96.557 85.937 1
 3 4 -18 170.744 91.208 1
 3 4 -18 -105.93 74.823 4
 -3 -4 17 144.808 81.067 1
 -3 -4 17 200.834 85.115 1
 -3 -4 17 200.232 72.546 5
 3 4 -17 167.032 83.764 1
 3 4 -17 166.197 81.737 1
 3 4 -17 195.958 73.859 4
 -3 -4 16 21.836 69.094 1
 -3 -4 16 191.36 71.87 1
 -3 -4 16 106.729 65.604 5
 3 4 -16 75.334 76.974 1
 3 4 -16 96.139 69.888 1
 3 4 -16 176.47 71.177 4
 -3 -4 15 4449.1 159.1 1
 -3 -4 15 4980.2 167 1
 -3 -4 15 4465.2 160.6 5
 3 4 -15 4735 167.7 1
 3 4 -15 4870.3 167.8 1
 3 4 -15 4595.1 156.3 4
 -3 -4 14 1501.6 122 1
 -3 -4 14 1615.3 133.5 1
 -3 -4 14 1398.1 124.7 5
 3 4 -14 1553.3 133.3 1
 3 4 -14 1607.9 130 1
 3 4 -14 1662.4 124.1 4
 -3 -4 13 101.755 62.782 1
 -3 -4 13 106.786 59.832 1
 -3 -4 13 55.2 54.152 5
 3 4 -13 46.395 59.813 1
 3 4 -13 53.536 61.172 1
 3 4 -13 60.048 49.452 4
 -3 -4 12 1166.2 127.3 1
 -3 -4 12 1308.4 115.2 1
 -3 -4 12 1419.4 112.6 5
 3 4 -12 1560.8 115.6 1
 3 4 -12 1602.3 117.5 1
 3 4 -12 1278.7 106.9 4
 -3 -4 11 22.525 52.707 1
 -3 -4 11 36.336 55.018 1
 -3 -4 11 62.665 50.25 5
 3 4 -11 42.39 54.432 1
 3 4 -11 -23.59 55.874 1
 3 4 -11 -22.547 47.459 4
 -3 -4 10 1020.5 97.3 1
 -3 -4 10 1063 100.5 1
 -3 -4 10 865.136 72.783 4
 -3 -4 10 927.381 100.839 5
 3 4 -10 890.227 102.548 1
 3 4 -10 1031.7 99.4 1
 3 4 -10 646.925 59.059 4
 -3 -4 9 2462.7 104.9 1
 -3 -4 9 2829.7 111.7 1
 -3 -4 9 2605.6 110 4
 -3 -4 9 2351 105 5
 3 4 -9 3047.8 115.5 1
 3 4 -9 2828.9 107.4 1
 3 4 -9 2353.4 107.9 4
 -3 -4 8 498.272 59.284 1
 -3 -4 8 740.499 86.976 1
 -3 -4 8 430.744 57.059 4
 -3 -4 8 489.245 51.789 5
 3 4 -8 520.923 61.119 1
 3 4 -8 670.19 78.772 1
 3 4 -8 469.143 58.78 4
 -3 -4 7 702.063 80.592 1
 -3 -4 7 546.48 56.62 1
 -3 -4 7 536.881 55.752 4
 3 4 -7 547.54 55.992 1
 3 4 -7 573.121 55.658 1
 3 4 -7 537.904 55.072 4
 -3 -4 6 2977.8 100.1 1
 -3 -4 6 3086.8 98 1
 -3 -4 6 2825.1 100.2 4
 3 4 -6 3105.6 105.5 1
 3 4 -6 2987.9 95.9 1
 3 4 -6 2894.7 100.7 4
 -3 -4 5 11189.5 145.1 1
 -3 -4 5 11266.5 144.2 1
 -3 -4 5 11566.3 154.8 4
 3 4 -5 11433.8 148.4 1
 3 4 -5 11370.1 146 1
 3 4 -5 11465.2 155.1 4
 -3 -4 4 4892.7 105.3 1
 -3 -4 4 4898.3 105.6 1
 -3 -4 4 4815.3 113.4 4
 3 4 -4 4805 106.9 1
 3 4 -4 4692.4 111 4
 -3 -4 3 10652.9 132.6 1
 -3 -4 3 10593.7 133.2 1
 -3 -4 3 10413.6 143.8 4
 3 4 -3 10484.8 132.1 1
 3 4 -3 10613.6 133.7 1
 3 4 -3 11153 137.1 2
 3 4 -3 10670.8 145.9 4
 -3 -4 2 594.214 67.033 1
 -3 -4 2 592.866 66.989 1
 -3 -4 2 684.557 76.575 4
 3 4 -2 585.074 67.436 1
 3 4 -2 604.256 66.639 1
 3 4 -2 728.052 70.466 2
 3 4 -2 664.008 75.594 4
 -3 -4 1 3977.7 91.7 1
 -3 -4 1 3854.1 88.3 1
 -3 -4 1 3928.3 103.1 4
 3 4 -1 3880.8 89.6 1
 3 4 -1 4046.6 91.4 1
 3 4 -1 3932.9 88.3 2
 3 4 -1 4090 104.3 4
 -3 -4 0 333.664 41.027 1
 -3 -4 0 324.689 42.778 1
 -3 -4 0 354.787 46.404 4
 3 4 0 409.16 44.229 1
 3 4 0 421.269 44.281 1
 3 4 0 321.248 44.052 2
 3 4 0 293.068 39.723 4
 -3 -4 -1 1575.9 71.8 1
 -3 -4 -1 1751.8 73.5 1
 -3 -4 -1 1726.5 88.1 4
 -3 -4 -1 1606.5 59.6 5
 3 4 1 1702 71.5 1
 3 4 1 1635.1 71.9 1
 3 4 1 1726.7 69.2 2
 3 4 1 1668.2 83.4 4
 -3 -4 -2 478.587 43.736 1
 -3 -4 -2 437.843 45.591 1
 -3 -4 -2 412.453 49.036 4
 -3 -4 -2 446.411 46.255 5
 3 4 2 456.71 44.555 1
 3 4 2 452.655 43.149 1
 3 4 2 456.437 44.27 2
 3 4 2 354.122 44.653 4
 -3 -4 -3 365.828 40.387 1
 -3 -4 -3 373.717 42.186 1
 -3 -4 -3 333.745 48.974 4
 -3 -4 -3 379.177 43.911 5
 3 4 3 361.319 42.68 1
 3 4 3 430.079 42.115 1
 3 4 3 413.856 41.39 2
 3 4 3 264.884 41.935 4
 -3 -4 -4 1835.7 74 1
 -3 -4 -4 1814.6 75.5 1
 -3 -4 -4 1697.4 95.5 4
 -3 -4 -4 1647.8 45.5 5
 3 4 4 1762.9 73.8 1
 3 4 4 1737.9 73.3 1
 3 4 4 1767.8 63.5 2
 -3 -4 -5 1074.7 70.8 1
 -3 -4 -5 993.699 69.075 1
 -3 -4 -5 986.164 95.736 4
 3 4 5 911.47 72.432 1
 3 4 5 861.611 67.2 1
 3 4 5 786.86 84.264 3
 -3 -4 -6 60.71 37.969 1
 -3 -4 -6 14.785 36.388 1
 -3 -4 -6 -31.021 44.454 4
 3 4 6 29.707 36.818 1
 3 4 6 -3.749 36.07 1
 3 4 6 -115.442 50.064 3
 -3 -4 -7 -32.03 37.156 1
 -3 -4 -7 23.417 37.546 1
 -3 -4 -7 -96.483 50.713 4
 3 4 7 -30.475 37.769 1
 3 4 7 30.799 34.821 1
 3 4 7 -95.851 51.382 3
 -3 -4 -8 199.636 42.693 1
 -3 -4 -8 191.244 43.28 1
 -3 -4 -8 166.195 56.339 4
 3 4 8 192.699 43.368 1
 3 4 8 176.749 41.408 1
 3 4 8 152.474 56.807 3
 -3 -4 -9 260.43 47.009 1
 -3 -4 -9 252.141 45.338 1
 -3 -4 -9 315.231 64.444 4
 3 4 9 277.303 47.771 1
 3 4 9 295.673 43.914 1
 3 4 9 221.324 59.848 3
 -3 -4 -10 376.638 51.906 1
 -3 -4 -10 379.568 50.482 1
 -3 -4 -10 185.869 65.588 4
 3 4 10 368.743 48.655 1
 3 4 10 279.053 63.121 3
 -3 -4 -11 1959.7 99.3 1
 -3 -4 -11 2041 96.6 1
 -3 -4 -11 1916.6 144 4
 3 4 11 1857.4 89.9 1
 3 4 11 1975.2 91.5 1
 3 4 11 1835.2 105.3 3
 -3 -4 -12 1050.4 96.7 1
 -3 -4 -12 840.709 93.91 1
 -3 -4 -12 657.216 81.741 4
 3 4 12 833.064 86.887 1
 3 4 12 1140.4 95.9 1
 3 4 12 809.729 81.231 3
 -3 -4 -13 824.783 100.611 1
 -3 -4 -13 931.315 102.418 1
 -3 -4 -13 553.245 84.639 4
 3 4 13 799.656 94.85 1
 3 4 13 952.479 104.893 1
 3 4 13 748.698 77.732 3
 -3 -4 -14 2479.9 117.9 1
 -3 -4 -14 2199.7 119.9 1
 -3 -4 -14 2629.3 172.9 4
 3 4 14 2117.6 106.4 1
 3 4 14 2655.1 124.5 1
 3 4 14 2411.4 127.4 3
 -3 -4 -15 303.381 68.178 1
 -3 -4 -15 421.616 73.167 1
 -3 -4 -15 383.513 93.87 4
 3 4 15 455.801 63.937 1
 3 4 15 351.279 73.567 1
 3 4 15 547.979 86.263 3
 -3 -4 -16 22.274 63.598 1
 -3 -4 -16 326.354 72.202 1
 -3 -4 -16 165.744 97.959 4
 3 4 16 291.152 64.04 1
 3 4 16 126.494 74.241 1
 3 4 16 268.794 85.854 3
 -3 -5 19 -27.337 75.92 1
 -3 -5 19 27.197 99.873 1
 -3 -5 19 -3.457 88.51 5
 3 5 -19 -23.966 104.864 1
 3 5 -19 153.671 100.828 1
 3 5 -19 184.184 84.503 4
 -3 -5 18 -84.502 79.272 1
 -3 -5 18 229.686 94.048 1
 -3 -5 18 70.146 75.372 5
 3 5 -18 -37.958 91.234 1
 3 5 -18 189.839 90.549 1
 3 5 -18 167.449 82.034 4
 -3 -5 17 -49.753 77.395 1
 -3 -5 17 58.961 87.617 1
 -3 -5 17 -15.179 77.944 5
 3 5 -17 -42.813 83.452 1
 3 5 -17 74.145 87.818 1
 3 5 -17 25.059 70.461 4
 -3 -5 16 -10.181 73.856 1
 -3 -5 16 -11.196 69.336 5
 3 5 -16 195.449 80.532 1
 3 5 -16 -25.737 76.168 1
 3 5 -16 -27.505 66.614 4
 -3 -5 15 369.496 83.826 1
 -3 -5 15 548.397 88.578 1
 -3 -5 15 498.74 78.009 5
 3 5 -15 504.38 88.303 1
 3 5 -15 535.536 88.982 1
 3 5 -15 363.643 71.512 4
 -3 -5 14 322.337 63.85 1
 -3 -5 14 603.746 83.256 1
 -3 -5 14 631.576 75.9 5
 3 5 -14 688.072 85.866 1
 3 5 -14 669.205 81.732 1
 3 5 -14 -39.224 58.775 4
 -3 -5 13 4970.9 152.8 1
 -3 -5 13 5419.1 164.4 1
 -3 -5 13 5335.3 160.2 5
 3 5 -13 5092.8 165.6 1
 3 5 -13 5424.9 163 1
 3 5 -13 5344.2 157.6 4
 -3 -5 12 987.652 109.786 1
 -3 -5 12 834.763 86.604 1
 -3 -5 12 624.638 70.534 5
 3 5 -12 714.775 78.459 1
 3 5 -12 901.729 111.769 1
 3 5 -12 627.436 73.14 4
 -3 -5 11 2332.9 119.4 1
 -3 -5 11 2302.9 128.4 1
 -3 -5 11 2282.6 124.9 5
 3 5 -11 2234.7 129.6 1
 3 5 -11 1781.5 116.5 1
 3 5 -11 2208 118.9 4
 -3 -5 10 1069.2 108.7 1
 -3 -5 10 1020.9 111 1
 -3 -5 10 1088.7 107 4
 -3 -5 10 1064.2 108.3 5
 3 5 -10 963.22 113.326 1
 3 5 -10 942.539 101.519 1
 3 5 -10 915.187 79.884 4
 -3 -5 9 733.107 66.789 1
 -3 -5 9 701.684 72.344 4
 -3 -5 9 742.574 79.262 5
 3 5 -9 657.644 69.886 1
 3 5 -9 901.179 95.268 1
 3 5 -9 558.616 68.416 4
 -3 -5 8 1567.9 105.4 1
 -3 -5 8 1655.7 103.5 1
 -3 -5 8 1050.7 127.1 4
 -3 -5 8 1646.5 105.4 5
 3 5 -8 1640.4 113.6 1
 3 5 -8 1695.9 113.8 1
 3 5 -8 950.168 121.472 4
 -3 -5 7 10038.6 160.6 1
 -3 -5 7 10078.4 160 1
 -3 -5 7 9686 165.9 4
 -3 -5 7 10405.2 159 5
 3 5 -7 10327.1 166.1 1
 3 5 -7 9845.4 194.1 1
 3 5 -7 9292.5 169.9 4
 -3 -5 6 17914.7 194.3 1
 -3 -5 6 18259.9 197.1 1
 -3 -5 6 18050.9 207.4 4
 -3 -5 6 18745.1 193.6 5
 3 5 -6 19050.6 204 1
 3 5 -6 18725.1 199.8 1
 3 5 -6 18059.6 208.6 4
 -3 -5 5 6835.4 135.2 1
 -3 -5 5 6931.7 137.2 1
 -3 -5 5 6470.4 140.8 4
 -3 -5 5 7184.9 130.8 5
 3 5 -5 6584.1 136.1 1
 3 5 -5 6674.6 143.4 4
 -3 -5 4 1073.4 92.5 1
 -3 -5 4 1090.6 95 1
 -3 -5 4 1280.9 89 5
 3 5 -4 989.936 94.197 1
 3 5 -4 1140.6 96.6 1
 3 5 -4 1274.2 99.7 4
 -3 -5 3 52958.4 298.8 1
 -3 -5 3 54682.4 303.1 1
 -3 -5 3 55484.3 327.8 4
 -3 -5 3 54121 277.7 5
 3 5 -3 53867.7 300.3 1
 3 5 -3 52555.8 296.6 1
 3 5 -3 55614.1 327.5 4
 -3 -5 2 689.193 62.345 1
 -3 -5 2 628.422 56.565 1
 -3 -5 2 1400.2 98.1 4
 -3 -5 2 1190 78.5 5
 3 5 -2 690.522 60.914 1
 3 5 -2 791.259 65.838 1
 3 5 -2 1151 87.5 2
 3 5 -2 1283.1 96 4
 -3 -5 1 2116.9 93.1 1
 -3 -5 1 2366.7 94.5 1
 -3 -5 1 2708.8 107.2 4
 -3 -5 1 2558.8 82.5 5
 3 5 -1 2373.7 92.5 1
 3 5 -1 2254.6 98.1 1
 3 5 -1 2416.9 86.7 2
 -3 -5 0 149.82 46.98 1
 -3 -5 0 292.523 47.145 1
 -3 -5 0 359.968 52.325 4
 -3 -5 0 221.154 36.327 5
 3 5 0 293.095 50.829 1
 3 5 0 214.337 47.551 1
 3 5 0 306.289 47.198 2
 3 5 0 308.248 51.206 4
 -3 -5 -1 -27.076 39.916 1
 -3 -5 -1 -23.177 40.913 1
 -3 -5 -1 23.814 42.622 4
 -3 -5 -1 -3.793 28.405 5
 3 5 1 57.677 43.744 1
 3 5 1 -19.191 39.068 1
 3 5 1 -9.575 38.533 2
 3 5 1 -16.655 43.673 4
 -3 -5 -2 344.188 48.016 1
 -3 -5 -2 286.467 48.705 1
 -3 -5 -2 336.455 52.701 4
 -3 -5 -2 264.864 31.467 5
 3 5 2 366.155 52.106 1
 3 5 2 303.385 48.406 1
 3 5 2 266.417 43.584 2
 3 5 2 227.004 47.919 4
 -3 -5 -3 1810.3 86.3 1
 -3 -5 -3 1930.4 89.5 1
 -3 -5 -3 1815.1 105.4 4
 -3 -5 -3 1638.5 54.6 5
 3 5 3 1837.5 90 1
 3 5 3 1854.8 87.2 1
 3 5 3 1691 68.3 2
 3 5 3 1604.3 119.8 4
 -3 -5 -4 334.533 49.712 1
 -3 -5 -4 251.843 48.803 1
 -3 -5 -4 252.677 87.542 4
 -3 -5 -4 350.405 38.094 5
 3 5 4 252.275 48.498 1
 3 5 4 253.729 48.657 1
 3 5 4 412.112 42.597 2
 -3 -5 -5 485.662 55.12 1
 -3 -5 -5 575.105 55.059 1
 -3 -5 -5 504.498 64.915 4
 3 5 5 667.233 82.44 1
 3 5 5 600.374 56.428 1
 -3 -5 -6 27.223 45.688 1
 -3 -5 -6 7.817 45.191 1
 -3 -5 -6 45.575 55.877 4
 3 5 6 5.456 75.766 1
 3 5 6 82.44 44.702 1
 -3 -5 -7 91.832 56.11 1
 -3 -5 -7 53.603 46.088 1
 -3 -5 -7 -18.276 54.382 4
 3 5 7 17.004 47.412 1
 3 5 7 71.003 46.114 1
 -3 -5 -8 93.242 48.836 1
 -3 -5 -8 26.063 48.646 1
 -3 -5 -8 95.722 59.541 4
 3 5 8 47.048 49.165 1
 3 5 8 92.385 45.285 1
 -3 -5 -9 34.019 48.804 1
 -3 -5 -9 102.426 50.591 1
 -3 -5 -9 -121.266 58.101 4
 3 5 9 87.706 48.157 1
 3 5 9 24.715 45.92 1
 -3 -5 -10 61.925 51.608 1
 -3 -5 -10 16.903 50.357 1
 -3 -5 -10 -28.808 61.009 4
 3 5 10 2.042 52.225 1
 3 5 10 -49.876 44.219 1
 -3 -5 -11 211.548 58.332 1
 -3 -5 -11 263.24 57.923 1
 -3 -5 -11 137.697 69.595 4
 3 5 11 154.371 58.572 1
 3 5 11 292.099 58.265 1
 3 5 11 61.388 69.709 3
 -3 -5 -12 123.376 61.578 1
 -3 -5 -12 207.6 62.462 1
 -3 -5 -12 27.616 68.914 4
 3 5 12 106.976 57.985 1
 3 5 12 234.435 60.483 1
 3 5 12 39.4 71.746 3
 -3 -5 -13 44.584 62.013 1
 -3 -5 -13 36.652 63.2 1
 -3 -5 -13 -99.01 77.418 4
 3 5 13 -31.893 51.944 1
 3 5 13 126.31 66.588 1
 3 5 13 -90.99 71.557 3
 -3 -5 -14 87.228 66.407 1
 -3 -5 -14 262.466 69.832 1
 -3 -5 -14 -57.698 80.938 4
 3 5 14 62.141 59.602 1
 3 5 14 185.578 78.849 1
 3 5 14 15.835 80.668 3
 -3 -6 17 182.396 85.165 1
 -3 -6 17 88.114 95.07 1
 -3 -6 17 -225.536 78.583 5
 3 6 -17 151.166 94.188 1
 3 6 -17 73.811 92.953 1
 3 6 -17 -187.889 78.706 4
 -3 -6 16 368.331 90.402 1
 -3 -6 16 594.319 99.791 1
 -3 -6 16 573.978 88.321 5
 3 6 -16 533.581 102.523 1
 3 6 -16 319.941 91.302 1
 3 6 -16 338.054 79.259 4
 -3 -6 15 33.732 73.754 1
 -3 -6 15 27.326 82.972 1
 -3 -6 15 96.505 78.702 5
 3 6 -15 35.384 64.215 1
 3 6 -15 242.205 84.034 1
 3 6 -15 50.074 69.751 4
 -3 -6 14 14.884 68.037 1
 -3 -6 14 80.823 73.334 1
 -3 -6 14 53.737 58.242 5
 3 6 -14 -61.638 71.103 1
 3 6 -14 22.101 72.082 1
 3 6 -14 65.003 59.192 4
 -3 -6 13 190.086 65.542 1
 -3 -6 13 67.373 67.573 1
 -3 -6 13 13.197 60.456 5
 3 6 -13 4.481 59.412 1
 3 6 -13 106.916 67.657 1
 3 6 -13 194.681 70.189 4
 -3 -6 12 -40.421 65.836 1
 -3 -6 12 9.323 69.104 1
 -3 -6 12 15.043 58.007 5
 3 6 -12 -19.705 70.551 1
 3 6 -12 -65.706 66.178 1
 3 6 -12 53.989 61.153 4
 -3 -6 11 -37.069 61.815 1
 -3 -6 11 -30.749 64.411 1
 -3 -6 11 19.856 55.236 4
 -3 -6 11 -61.587 51.297 5
 3 6 -11 3.535 82.162 1
 3 6 -11 20.251 61.26 1
 3 6 -11 -15.124 55.987 4
 -3 -6 10 213.142 63.915 1
 -3 -6 10 177.253 57.674 4
 -3 -6 10 154.895 59.827 5
 3 6 -10 275.995 67.711 1
 3 6 -10 283.748 65.238 1
 3 6 -10 189.629 59.318 4
 -3 -6 9 99.192 60.721 1
 -3 -6 9 87.464 57.05 1
 -3 -6 9 145.639 58.414 4
 -3 -6 9 171.942 54.56 5
 3 6 -9 266.872 63.607 1
 3 6 -9 112.407 60.512 1
 3 6 -9 72.466 56.865 4
 -3 -6 8 -62.83 47.535 1
 -3 -6 8 1.438 58.858 1
 -3 -6 8 -63.058 52.671 4
 -3 -6 8 -14.609 48.607 5
 3 6 -8 -112.063 50.542 1
 3 6 -8 8.016 52.892 1
 3 6 -8 -12.857 55.402 4
 -3 -6 7 1331.9 106.3 1
 -3 -6 7 1360.9 110.6 1
 -3 -6 7 1051.2 111.3 4
 -3 -6 7 1474.7 105.3 5
 3 6 -7 1476.5 111 1
 3 6 -7 1445.5 103.4 1
 3 6 -7 940.726 112.618 4
 -3 -6 6 131.362 53.167 1
 -3 -6 6 273.041 63.399 1
 -3 -6 6 4.659 56.001 4
 -3 -6 6 274.29 52.609 5
 3 6 -6 266.161 61.67 1
 3 6 -6 -31.395 54.104 4
 -3 -6 5 21998.4 226.3 1
 -3 -6 5 22195.2 227.2 1
 -3 -6 5 22252.7 237.7 4
 -3 -6 5 23094.8 215.7 5
 3 6 -5 21679.7 228.1 1
 3 6 -5 22934.6 233.5 1
 3 6 -5 21610.3 236 4
 -3 -6 4 18837.3 222.8 1
 -3 -6 4 20063.7 218.7 1
 -3 -6 4 20455.1 230.4 4
 -3 -6 4 20054.1 197.8 5
 3 6 -4 19574.6 215 1
 3 6 -4 20089.8 218.6 1
 3 6 -4 20078.2 229.6 4
 -3 -6 3 370.548 73.429 1
 -3 -6 3 339.485 62.982 1
 -3 -6 3 959.854 107.697 4
 -3 -6 3 406.857 52.712 5
 3 6 -3 355.007 64.623 1
 3 6 -3 365.683 64.909 1
 3 6 -3 414.362 63.981 4
 -3 -6 2 6908.8 217.8 1
 -3 -6 2 7484.6 145.5 1
 -3 -6 2 8443.4 168.7 4
 -3 -6 2 7463.6 129.1 5
 3 6 -2 7116.3 147 1
 3 6 -2 7689.6 155.6 1
 3 6 -2 7646.6 138.8 2
 3 6 -2 7798.9 160.3 4
 -3 -6 1 42482.5 424.6 1
 -3 -6 1 53242.1 315.3 1
 -3 -6 1 54935.8 352.3 4
 -3 -6 1 53630.8 269.6 5
 3 6 -1 52158.4 313.2 1
 3 6 -1 53609.4 318.7 1
 3 6 -1 53420.5 279.1 2
 3 6 -1 52766.9 343.9 4
 -3 -6 0 334.867 71.208 1
 -3 -6 0 376.27 61.493 1
 -3 -6 0 836.83 77.353 5
 3 6 0 384.501 64.687 1
 3 6 0 385.705 59.228 1
 3 6 0 290.762 56.264 2
 3 6 0 840.366 102.279 4
 -3 -6 -1 380.913 61.044 1
 -3 -6 -1 383.229 61.751 1
 -3 -6 -1 866.517 107.682 4
 -3 -6 -1 331.555 39.498 5
 3 6 1 297.86 57.741 1
 3 6 1 281.84 61.413 1
 3 6 1 291.261 51.296 2
 3 6 1 289.103 59.818 4
 -3 -6 -2 213.055 55.231 1
 -3 -6 -2 236.474 56.115 1
 -3 -6 -2 345.566 58.045 4
 -3 -6 -2 519.518 59.255 5
 3 6 2 284.513 59.29 1
 3 6 2 329.249 56.692 1
 3 6 2 263.391 45.797 2
 3 6 2 217.168 56.452 4
 -3 -6 -3 3179.6 114.2 1
 -3 -6 -3 3360.1 118 1
 -3 -6 -3 3716 136.7 4
 -3 -6 -3 3106.7 66.6 5
 3 6 3 3381.5 117.1 1
 3 6 3 3231.5 116.5 1
 3 6 3 3045.1 80.8 2
 3 6 3 2941.6 126.3 4
 -3 -6 -4 221.913 54.755 1
 -3 -6 -4 245.786 56.536 1
 -3 -6 -4 47.037 57.859 4
 3 6 4 246.349 57.087 1
 3 6 4 219.065 56.015 1
 3 6 4 202.512 39.352 2
 -3 -6 -5 229.393 54.422 1
 -3 -6 -5 93.665 52.603 1
 -3 -6 -5 84.836 59.793 4
 3 6 5 135.091 53.1 1
 3 6 5 53.106 52.381 1
 -3 -6 -6 63.782 54.291 1
 -3 -6 -6 -92.707 48.043 1
 -3 -6 -6 15.815 55.978 4
 3 6 6 7.938 54.145 1
 3 6 6 4.317 52.959 1
 -3 -6 -7 78.028 54.207 1
 -3 -6 -7 -15.83 55.151 1
 -3 -6 -7 -91.275 63.854 4
 3 6 7 35.918 53.9 1
 3 6 7 -51.544 52.867 1
 -3 -6 -8 -94.619 52.71 1
 -3 -6 -8 29.328 56.292 1
 -3 -6 -8 109.362 64.57 4
 3 6 8 85.166 58.024 1
 3 6 8 67.44 54.546 1
 -3 -6 -9 -64.486 55.538 1
 -3 -6 -9 -87.331 56.038 1
 3 6 9 -135.001 55.588 1
 3 6 9 -29.228 53.468 1
 -3 -6 -10 110.609 62.337 1
 -3 -6 -10 114.042 66.362 1
 -3 -6 -10 42.939 74.869 4
 3 6 10 129.375 62.071 1
 3 6 10 142.672 58.036 1
 -3 -6 -11 154.05 67.453 1
 -3 -6 -11 42.164 64.674 1
 -3 -6 -11 144.48 78.946 4
 3 6 11 88.148 63.282 1
 3 6 11 182.247 60.652 1
 -3 -6 -12 -26.296 67.136 1
 -3 -6 -12 -57.121 64.63 1
 -3 -6 -12 20.266 80.054 4
 3 6 12 -56.924 64.44 1
 3 6 12 44.42 64.765 1
 -3 -7 16 -46.318 90.804 1
 -3 -7 16 106.141 102.55 1
 -3 -7 16 89.592 93.749 5
 3 7 -16 236.186 102.503 1
 3 7 -16 25.361 89.706 1
 3 7 -16 -133.804 85.074 4
 -3 -7 15 -4.994 79.973 1
 -3 -7 15 152.863 97.11 1
 -3 -7 15 -106.206 78.658 5
 3 7 -15 -109.577 80.144 1
 3 7 -15 46.646 83.848 1
 3 7 -15 -92.22 70.758 4
 -3 -7 14 -30.992 72.982 1
 -3 -7 14 135.265 87.898 1
 -3 -7 14 -170.017 69.657 5
 3 7 -14 -3.254 80.474 1
 3 7 -14 -44.203 75.721 1
 3 7 -14 10.981 72.984 4
 -3 -7 13 63.82 77.806 1
 -3 -7 13 168.635 87.985 1
 -3 -7 13 -87.043 68.229 5
 3 7 -13 -83.162 77.15 1
 3 7 -13 -144.042 69.772 1
 3 7 -13 2.555 69.982 4
 -3 -7 12 -71.503 59.44 1
 -3 -7 12 -205.038 72.992 1
 -3 -7 12 28.935 66.5 4
 -3 -7 12 13.357 66.586 5
 3 7 -12 -67.445 70.468 1
 3 7 -12 -17.949 65.459 1
 3 7 -12 -22.736 65.468 4
 -3 -7 11 74.072 57.974 1
 -3 -7 11 71.195 74.367 1
 -3 -7 11 -40.948 61.714 4
 -3 -7 11 -101.841 57.895 5
 3 7 -11 -64.266 68.637 1
 3 7 -11 84.826 65.259 1
 3 7 -11 -149.344 62.687 4
 -3 -7 10 85.27 65.455 1
 -3 -7 10 52.019 68.516 1
 -3 -7 10 141.755 64.729 4
 -3 -7 10 80.178 61.699 5
 3 7 -10 103.631 69.307 1
 3 7 -10 197.583 69.722 1
 3 7 -10 120.103 69.933 4
 -3 -7 9 53.643 62.62 1
 -3 -7 9 -20.722 65.264 1
 -3 -7 9 12.898 63.57 4
 -3 -7 9 -99.188 54.764 5
 3 7 -9 148.594 118.432 1
 3 7 -9 -83.51 59.049 1
 3 7 -9 24.069 59.44 4
 -3 -7 8 210.21 67.239 1
 -3 -7 8 152.629 102.881 1
 -3 -7 8 175.75 60.964 4
 -3 -7 8 48.517 52.825 5
 3 7 -8 162.827 67.99 1
 3 7 -8 223.81 61.402 1
 3 7 -8 65.352 61.314 4
 -3 -7 7 22.576 61.27 1
 -3 -7 7 -74.283 58.407 1
 -3 -7 7 7.068 54.827 4
 -3 -7 7 -19.105 50.122 5
 3 7 -7 40.836 64.858 1
 3 7 -7 -2.05 58.212 4
 -3 -7 6 84.817 58.292 1
 -3 -7 6 20.45 63.217 1
 -3 -7 6 98.567 63.058 4
 -3 -7 6 102.314 62.485 5
 3 7 -6 -32.027 58.444 1
 3 7 -6 -6.697 63.245 1
 3 7 -6 -28.902 57.934 4
 -3 -7 5 1454.4 114.9 1
 -3 -7 5 1168.7 117.7 1
 -3 -7 5 1123 116.6 4
 -3 -7 5 1369.5 111.4 5
 3 7 -5 1019.1 110.9 1
 3 7 -5 1126.6 120.2 1
 3 7 -5 1021.2 121 4
 -3 -7 4 111.171 58.838 1
 -3 -7 4 149.417 55.376 1
 -3 -7 4 9.706 60.182 4
 -3 -7 4 196.474 51.889 5
 3 7 -4 170.385 58.247 1
 3 7 -4 157.802 61.38 1
 3 7 -4 -48.132 52.754 4
 -3 -7 3 1256.1 113.9 1
 -3 -7 3 955.729 104.274 1
 -3 -7 3 1272 118.6 4
 -3 -7 3 967.803 99.216 5
 3 7 -3 1024.8 107.4 1
 3 7 -3 1228.3 121.5 1
 3 7 -3 1029.1 117.4 4
 -3 -7 2 6797.5 155.6 1
 -3 -7 2 6554 150.9 1
 -3 -7 2 7075.5 176.3 4
 -3 -7 2 6464.8 133.6 5
 3 7 -2 6491.3 152.6 1
 3 7 -2 6821.6 156 1
 3 7 -2 6806.1 136.2 2
 3 7 -2 6986.6 165.7 4
 -3 -7 1 88.685 60.762 1
 -3 -7 1 27.427 59.008 1
 -3 -7 1 147.737 64.295 4
 -3 -7 1 5.254 43.851 5
 3 7 -1 55.133 57.929 1
 3 7 -1 15.896 59.587 1
 3 7 -1 65.339 48.544 2
 3 7 -1 89.969 57.394 4
 -3 -7 0 642.752 71.763 1
 -3 -7 0 659.063 74.949 1
 -3 -7 0 485.286 70.716 4
 -3 -7 0 789.807 83.965 5
 3 7 0 588.646 69.453 1
 3 7 0 601.651 74.521 1
 3 7 0 535.526 57.703 2
 3 7 0 428.217 68.719 4
 -3 -7 -1 507.528 69.018 1
 -3 -7 -1 757.808 78.396 1
 -3 -7 -1 420.199 70.462 4
 -3 -7 -1 513.035 47.613 5
 3 7 1 939.12 114.097 1
 3 7 1 693.636 75.167 1
 3 7 1 630.337 59.706 2
 3 7 1 447.022 72.829 4
 -3 -7 -2 369.268 68.931 1
 -3 -7 -2 441.735 69.255 1
 -3 -7 -2 487.842 73.698 4
 -3 -7 -2 403.412 40.042 5
 3 7 2 417.145 67.427 1
 3 7 2 535.601 68.444 1
 3 7 2 439.398 51.47 2
 3 7 2 436.789 71.795 4
 -3 -7 -3 507.935 68.999 1
 -3 -7 -3 539.2 70.432 1
 -3 -7 -3 516.413 74.172 4
 -3 -7 -3 515.116 55.838 5
 3 7 3 503.264 71.048 1
 3 7 3 494.685 74.17 1
 3 7 3 544.812 50.197 2
 -3 -7 -4 993.75 116.996 1
 -3 -7 -4 993.493 117.826 1
 -3 -7 -4 1260.8 133.5 4
 3 7 4 1167.6 117.5 1
 3 7 4 942.622 117.026 1
 -3 -7 -5 1947.2 127.9 1
 -3 -7 -5 1561.4 123.8 1
 -3 -7 -5 1755.2 141.9 4
 3 7 5 2087.5 125.9 1
 3 7 5 1792.4 127.2 1
 -3 -7 -6 2217.6 132.1 1
 -3 -7 -6 2125.1 131.6 1
 -3 -7 -6 1963.7 150.2 4
 3 7 6 1947.5 127.7 1
 3 7 6 2017.2 131.4 1
 -3 -7 -7 1165.9 127 1
 -3 -7 -7 828.259 80.035 1
 -3 -7 -7 852.089 92.336 4
 3 7 7 1163.5 129.4 1
 3 7 7 1202.8 128.6 1
 -3 -7 -8 534.035 78.242 1
 -3 -7 -8 612.673 82.207 1
 -3 -7 -8 737.043 92.616 4
 3 7 8 687.258 80.496 1
 3 7 8 670.229 78.843 1
 -3 -7 -9 -177.5 67.252 1
 -3 -7 -9 -48.404 68.695 1
 -3 -7 -9 52.561 78.957 4
 3 7 9 76.869 68.417 1
 3 7 9 -2.823 66.238 1
 -3 -7 -10 136.762 73.472 1
 -3 -7 -10 95.691 75.984 1
 -3 -7 -10 96.793 88.945 4
 3 7 10 109.584 74.143 1
 3 7 10 139.893 71.159 1
 -3 -8 13 -80.218 79.032 1
 -3 -8 13 56.24 96.599 1
 -3 -8 13 248.074 85.095 5
 3 8 -13 133.716 91.529 1
 3 8 -13 -31.695 81.759 1
 3 8 -13 -31.107 80.916 4
 -3 -8 12 -26.87 78.326 1
 -3 -8 12 -200.879 77.924 1
 -3 -8 12 21.038 78.419 4
 -3 -8 12 68.072 76.138 5
 3 8 -12 5.482 86.383 1
 3 8 -12 172.3 76.853 1
 3 8 -12 88.088 82.882 4
 -3 -8 11 -20.373 74.554 1
 -3 -8 11 -9.947 76.411 1
 -3 -8 11 97.319 73.918 5
 3 8 -11 94.084 80.23 1
 3 8 -11 144.754 78.818 1
 3 8 -11 23.242 75.52 4
 -3 -8 10 163.622 77.733 1
 -3 -8 10 131.09 71.635 1
 -3 -8 10 105.637 73.846 4
 -3 -8 10 173.592 69.867 5
 3 8 -10 194.802 83.23 1
 3 8 -10 66.168 77.824 1
 3 8 -10 86.961 72.515 4
 -3 -8 9 69.623 72.829 1
 -3 -8 9 131.072 83.223 1
 -3 -8 9 -28.854 72.408 4
 -3 -8 9 145.151 68.681 5
 3 8 -9 268.15 84.307 1
 3 8 -9 211.891 78.094 1
 3 8 -9 165.472 73.144 4
 -3 -8 8 90.355 73.647 1
 -3 -8 8 26.596 79.728 1
 -3 -8 8 273.715 75.744 4
 -3 -8 8 139.735 66.873 5
 3 8 -8 228.023 79.285 1
 3 8 -8 191.961 72.663 4
 -3 -8 7 70.003 63.38 1
 -3 -8 7 -26.168 69.08 1
 -3 -8 7 -132.073 63.994 4
 -3 -8 7 37.576 59.317 5
 3 8 -7 92.78 64.928 1
 3 8 -7 11.803 69.615 1
 3 8 -7 -41.205 69.243 4
 -3 -8 6 47.607 65.36 1
 -3 -8 6 46.702 72.058 1
 -3 -8 6 30.39 65.226 4
 -3 -8 6 1.273 58.677 5
 3 8 -6 80.124 70.173 1
 3 8 -6 95.22 123.51 1
 3 8 -6 -37.27 61.407 4
 -3 -8 5 325.959 73.938 1
 -3 -8 5 499.968 100.153 1
 -3 -8 5 380.696 77.237 4
 -3 -8 5 294.167 61.817 5
 3 8 -5 342.84 74.053 1
 3 8 -5 572.963 85.631 1
 3 8 -5 155.857 74.414 4
 -3 -8 4 192.129 69.442 1
 -3 -8 4 137.931 73.689 1
 -3 -8 4 385.405 79.369 4
 3 8 -4 353.964 71.937 1
 3 8 -4 362.787 79.98 1
 3 8 -4 263.892 77.956 4
 -3 -8 3 145.724 70.119 1
 -3 -8 3 -14.442 56.01 1
 -3 -8 3 38.17 67.492 4
 -3 -8 3 98.5 53.937 5
 3 8 -3 48.698 64.267 1
 3 8 -3 25.806 70.056 1
 3 8 -3 -58.704 58.957 2
 3 8 -3 23.145 67.372 4
 -3 -8 2 209.175 70.766 1
 -3 -8 2 376.845 72.295 1
 -3 -8 2 468.89 80.309 4
 -3 -8 2 318.995 56.86 5
 3 8 -2 334.504 70.813 1
 3 8 -2 391.042 71.331 1
 3 8 -2 577.967 72.083 2
 3 8 -2 385.728 77.148 4
 -3 -8 1 326.671 73.92 1
 -3 -8 1 283.898 71 1
 -3 -8 1 266.325 77.06 4
 -3 -8 1 158.221 52.027 5
 3 8 -1 213.87 67.584 1
 3 8 -1 144.232 68.185 1
 3 8 -1 246.209 58.473 2
 3 8 -1 134.945 73.197 4
 -3 -8 0 702.113 84.422 1
 -3 -8 0 752.577 87.487 1
 -3 -8 0 592.331 85.008 4
 -3 -8 0 864.327 90.806 5
 3 8 0 826.236 82.943 1
 3 8 0 686.092 82.825 1
 3 8 0 694.144 64.147 2
 3 8 0 593.888 80.244 4
 -3 -8 -1 1768.7 137.4 1
 -3 -8 -1 1943.9 143.7 1
 -3 -8 -1 1904.8 155.1 4
 -3 -8 -1 1819.5 89.7 5
 3 8 1 2102.8 137.6 1
 3 8 1 2182.1 144.6 1
 3 8 1 1755.7 92.7 2
 3 8 1 1718.7 139.9 4
 -3 -8 -2 -37.041 64.625 1
 -3 -8 -2 -26.421 65.173 1
 -3 -8 -2 -12.456 72.182 4
 -3 -8 -2 -25.937 35.17 5
 3 8 2 109.992 70.046 1
 3 8 2 28.348 71.433 1
 3 8 2 48.947 47.751 2
 3 8 2 34.399 67.99 4
 -3 -8 -3 291.541 77.726 1
 -3 -8 -3 80.747 75.405 1
 -3 -8 -3 148.071 74.15 4
 -3 -8 -3 157.461 32.238 5
 3 8 3 70.727 70.965 1
 3 8 3 91.007 77.799 1
 -3 -8 -4 108.669 73.454 1
 -3 -8 -4 74.959 71.998 1
 -3 -8 -4 -49.808 78.569 4
 3 8 4 113.639 72.879 1
 3 8 4 -42.008 76.203 1
 -3 -8 -5 108.959 78.275 1
 -3 -8 -5 133.782 78.125 1
 -3 -8 -5 99.002 81.927 4
 3 8 5 128.433 68.957 1
 3 8 5 -63.833 76.09 1
 -3 -8 -6 53.823 80.109 1
 -3 -8 -6 -33.17 80.892 1
 -3 -8 -6 30.643 82.717 4
 3 8 6 36.144 79.165 1
 3 8 6 -38.247 78.796 1
 -3 -8 -7 148.447 80.53 1
 -3 -8 -7 -34.452 79.772 1
 -3 -8 -7 -188.589 83.4 4
 3 8 7 -70.43 77.35 1
 3 8 7 -138.538 81.15 1
 -3 -9 9 47.793 82.482 1
 -3 -9 9 183.703 97.842 1
 -3 -9 9 -158.08 81.945 4
 -3 -9 9 187.151 79.226 5
 3 9 -9 -69.31 83.656 1
 3 9 -9 212.827 86.876 1
 3 9 -9 -42.641 83.23 4
 -3 -9 8 692.368 98.806 1
 -3 -9 8 526.893 92.326 1
 -3 -9 8 676.843 93.218 4
 -3 -9 8 851.931 90.507 5
 3 9 -8 766.152 99.938 1
 3 9 -8 856.809 98.658 4
 -3 -9 7 797.651 102.437 1
 -3 -9 7 1455.7 163.8 1
 -3 -9 7 786.484 99.129 4
 -3 -9 7 1441.3 151.5 5
 3 9 -7 948.218 103.947 1
 3 9 -7 1067.5 110.3 1
 3 9 -7 426.639 82.299 4
 -3 -9 6 40.966 85.685 1
 -3 -9 6 -176.563 82.932 1
 -3 -9 6 155.455 86.893 4
 -3 -9 6 174.852 70.026 5
 3 9 -6 90.284 81.648 1
 3 9 -6 168.717 92.232 1
 3 9 -6 0.637 69.785 4
 -3 -9 5 238.431 81.286 1
 -3 -9 5 213.328 86.125 1
 -3 -9 5 237.411 79.783 4
 -3 -9 5 -1.867 66.67 5
 3 9 -5 -128.357 74.974 1
 3 9 -5 -182.472 80.658 1
 3 9 -5 -7.922 71.623 4
 -3 -9 4 -54.249 80.276 1
 -3 -9 4 -2.04 85.291 1
 -3 -9 4 62.15 63.467 5
 3 9 -4 -23.335 71.278 1
 3 9 -4 -12.239 76.593 1
 3 9 -4 271.372 82.69 4
 -3 -9 3 162.901 84.564 1
 -3 -9 3 184.564 74.441 1
 -3 -9 3 79.014 80.314 4
 -3 -9 3 86.241 61.275 5
 3 9 -3 47.401 74.808 1
 3 9 -3 180.689 87.813 1
 3 9 -3 111.472 127.917 2
 3 9 -3 191.587 80.716 4
 -3 -9 2 85.024 77.254 1
[truncated: 245,993 more chars]
