# Supplementary material
Source: MDPI journal article supplement (https://www.mdpi.com/2304-6740/6/1/5)

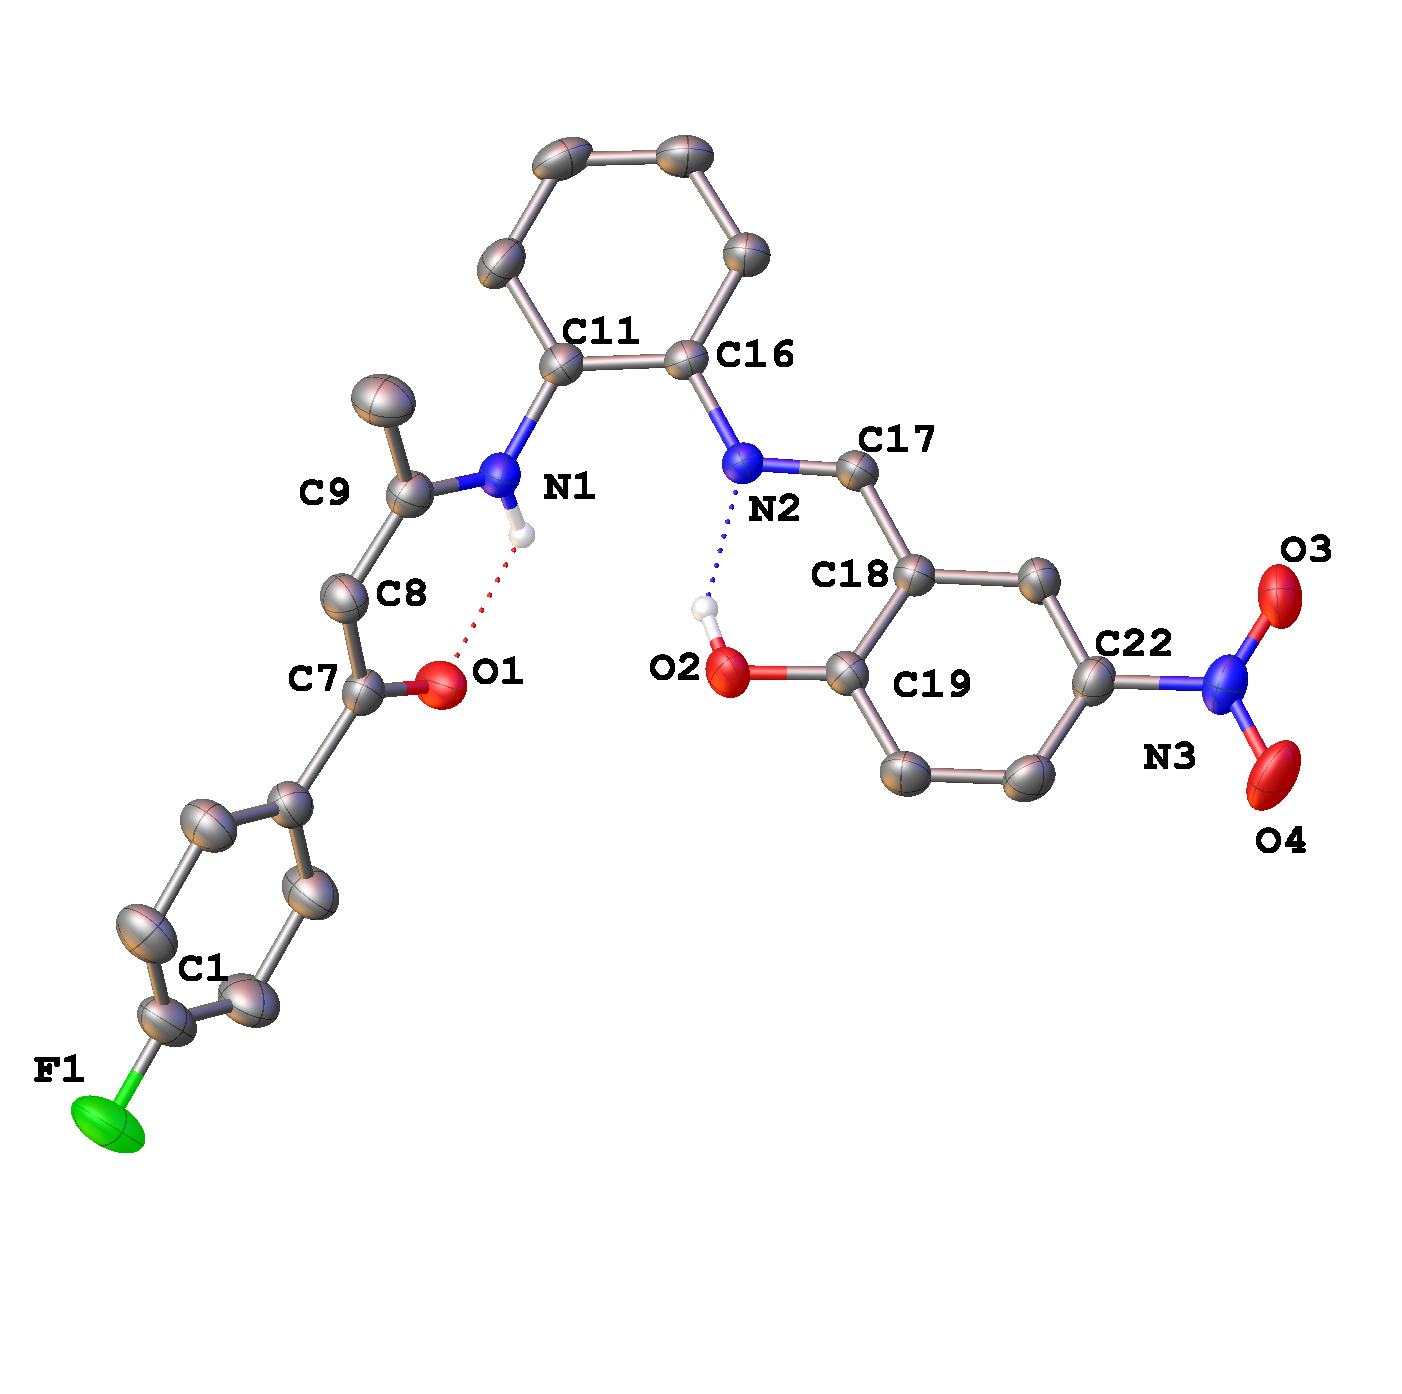

Supplement: s1 [file s1 › Figures-Schemes/Figure 1.tif]

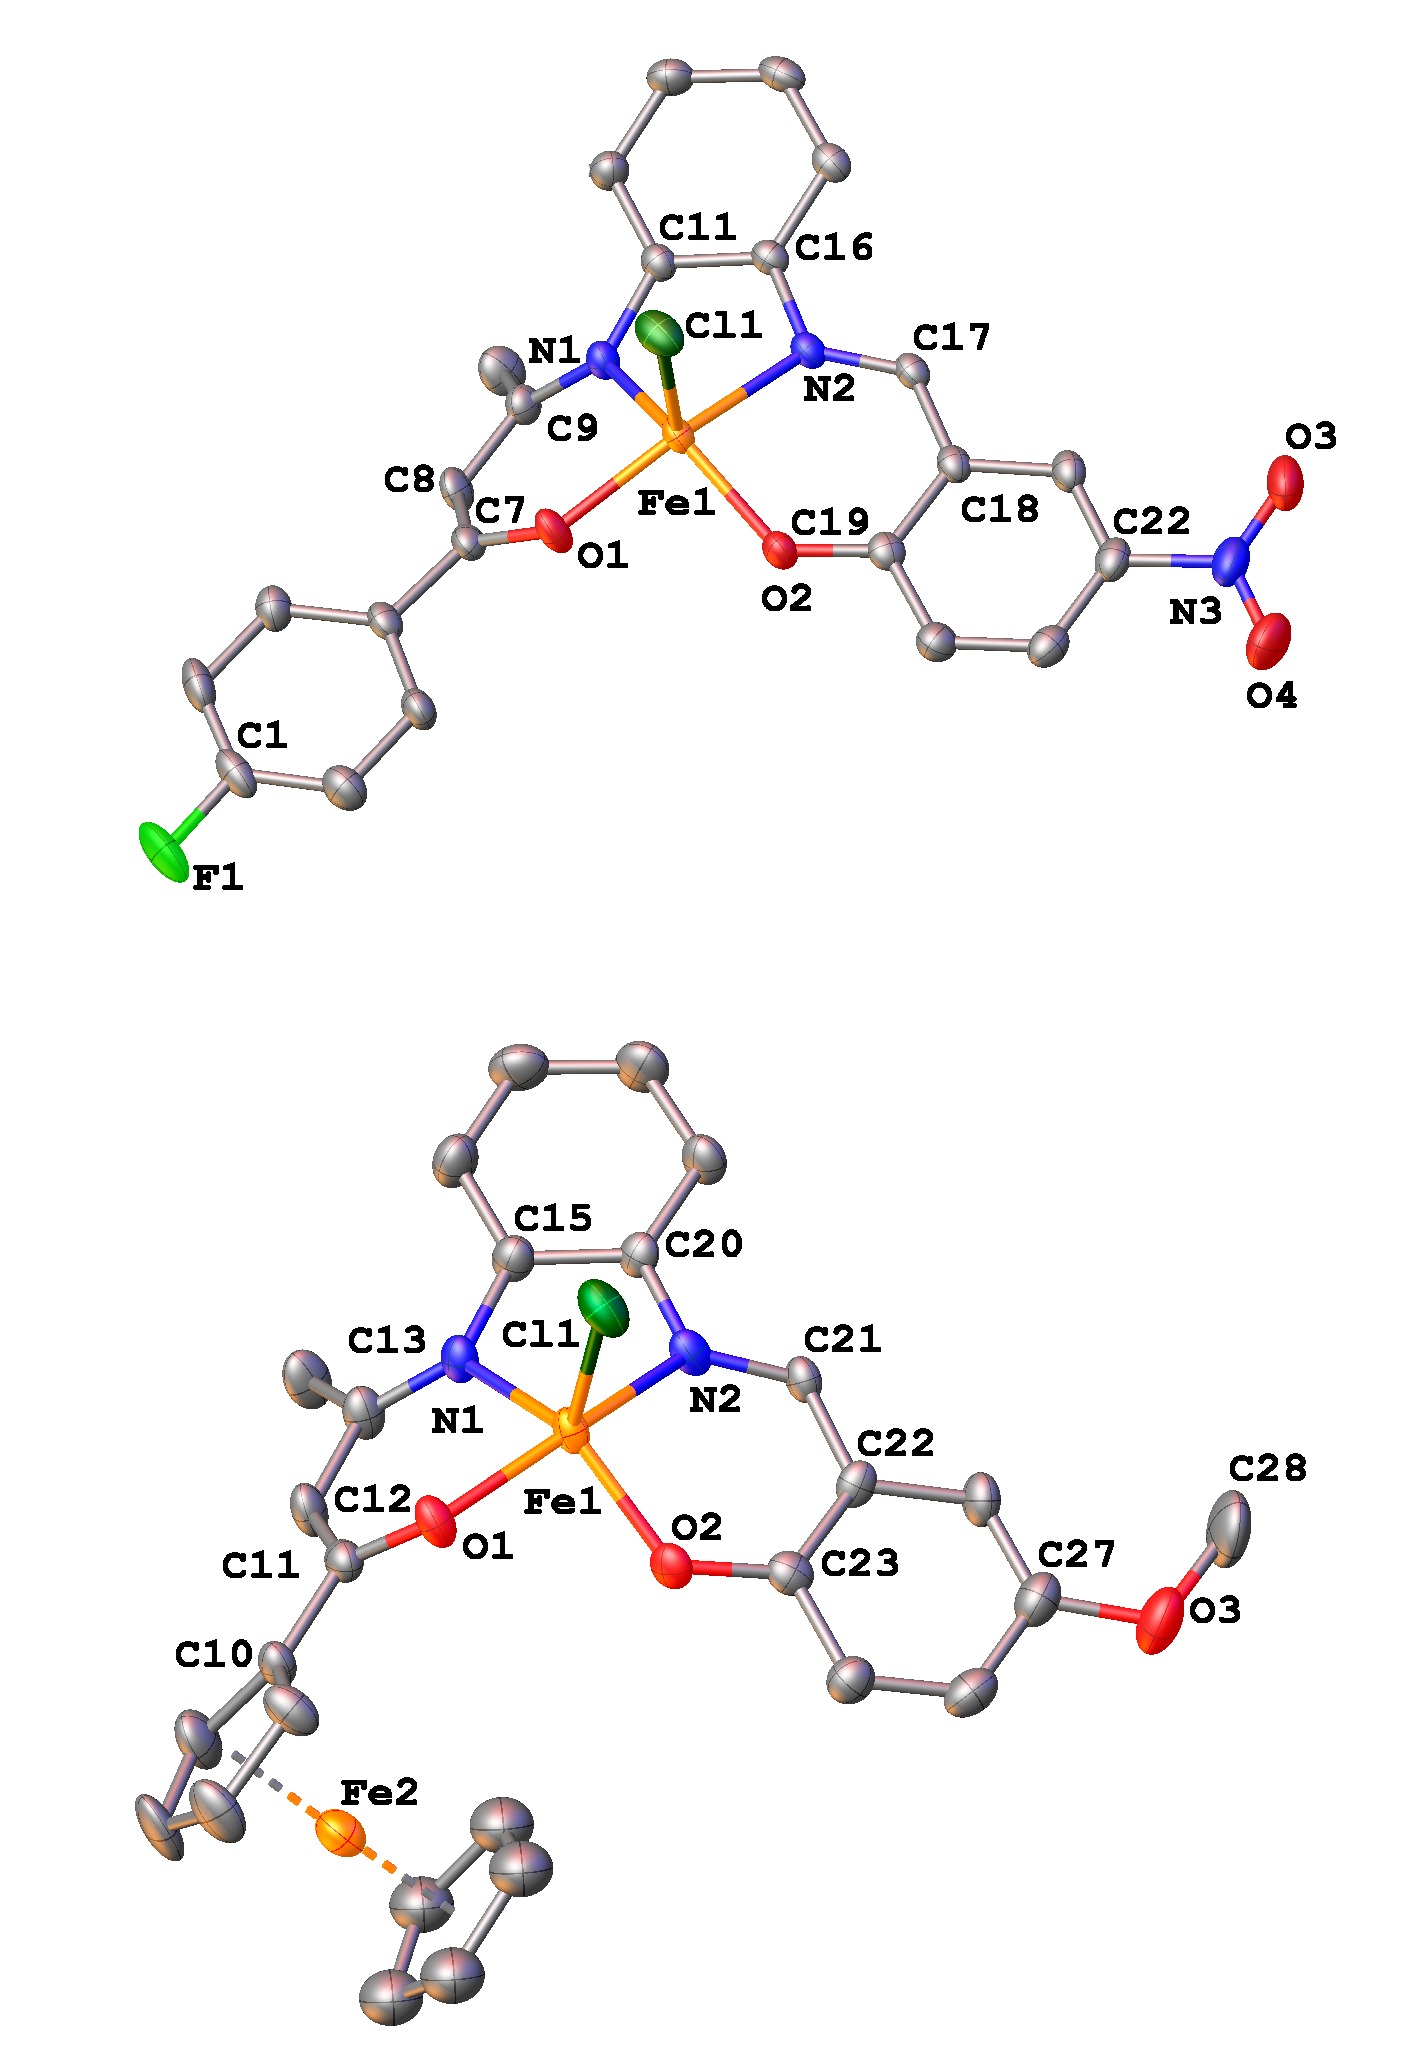

Supplement: s1 [file s1 › Figures-Schemes/Figure 2.tif]

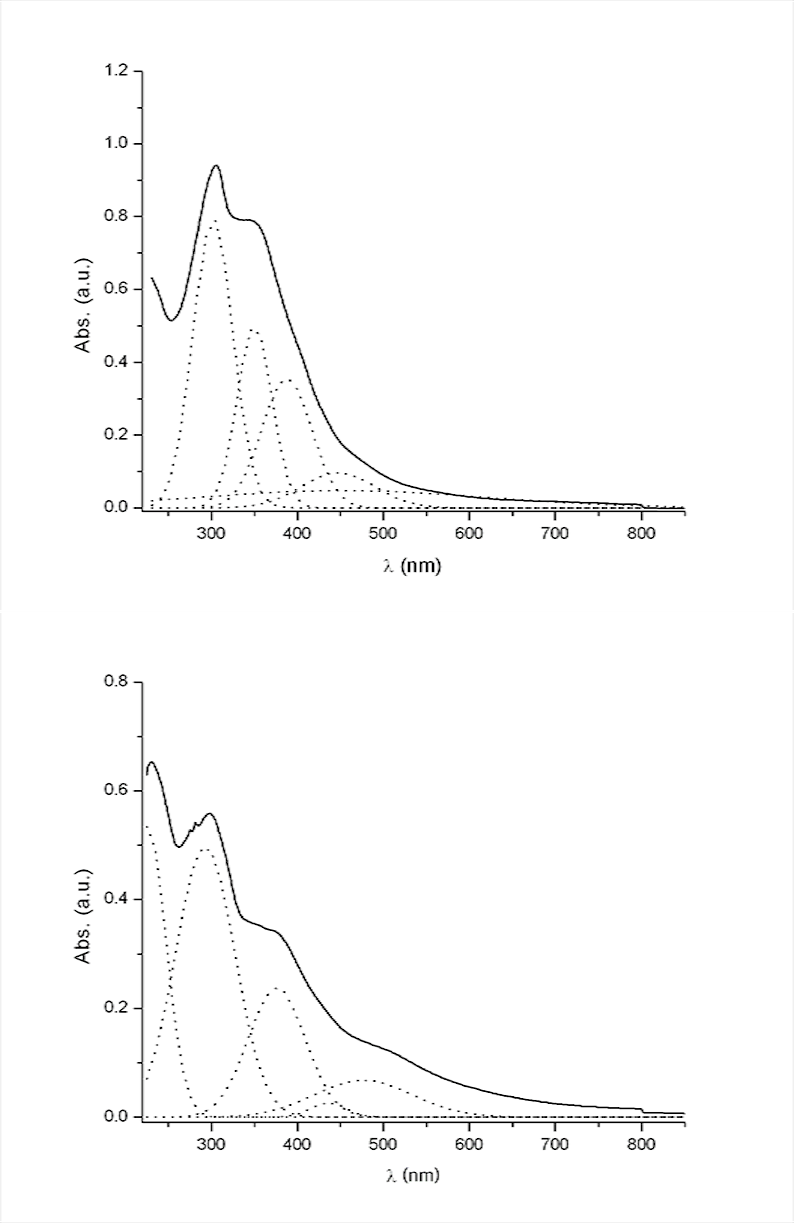

Supplement: s1 [file s1 › Figures-Schemes/Figure 3.tif]

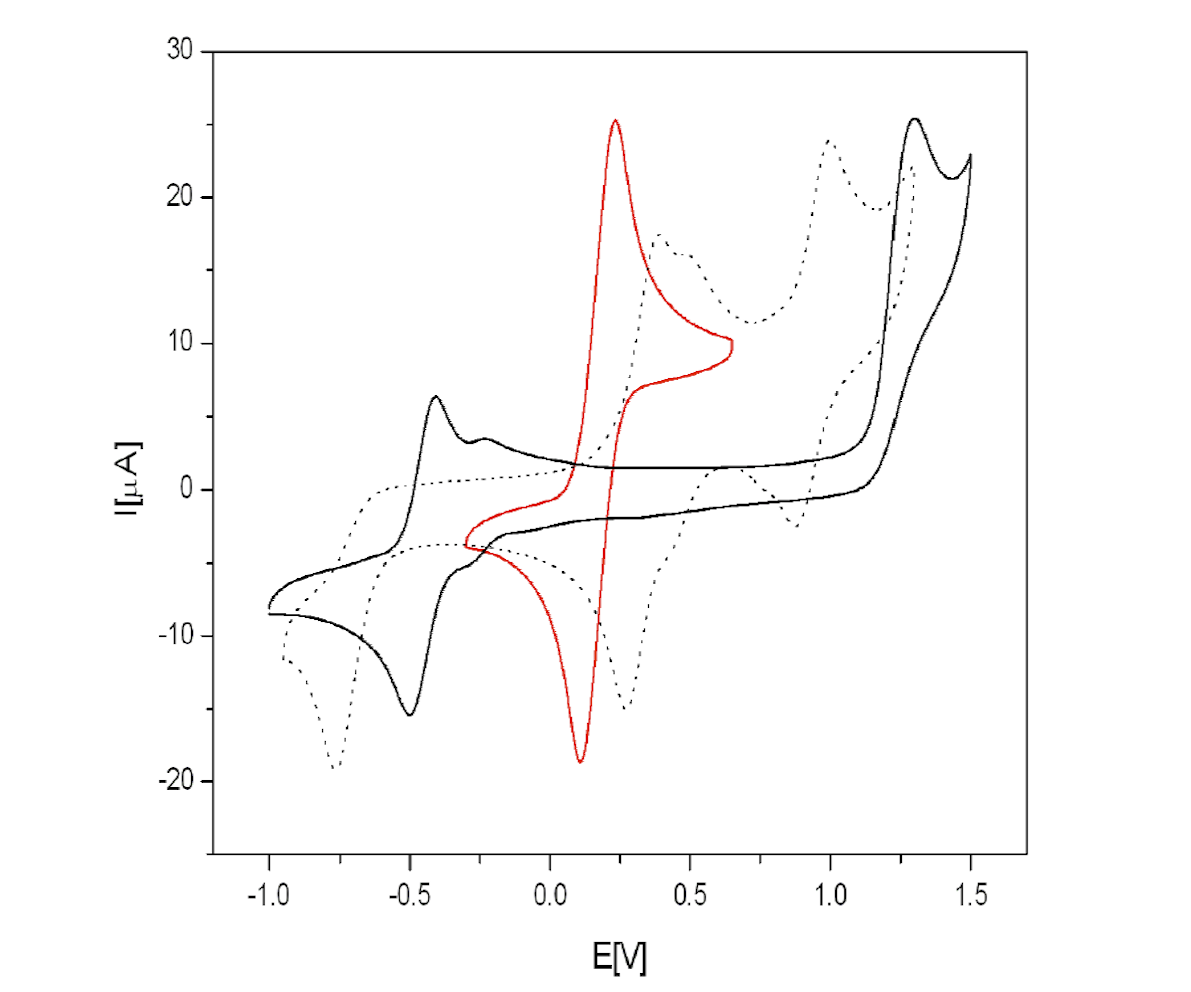

Supplement: s1 [file s1 › Figures-Schemes/Figure 4.tif]

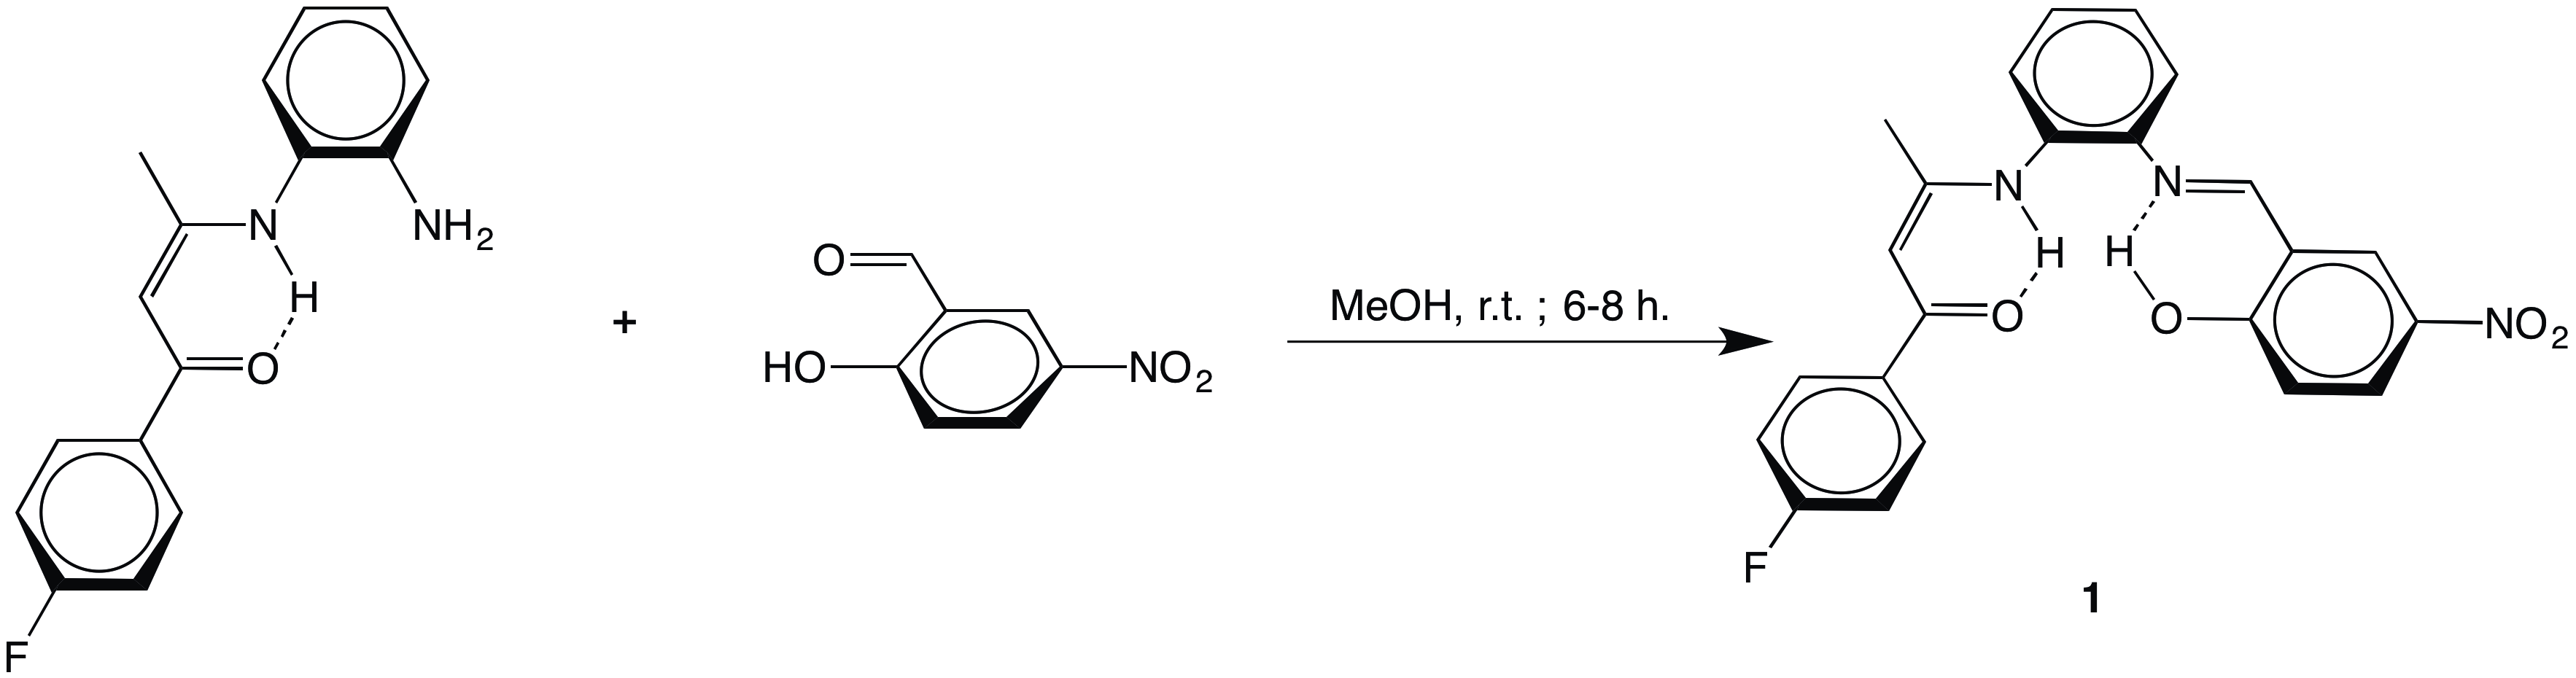

Supplement: s1 [file s1 › Figures-Schemes/scheme 1 .tif]

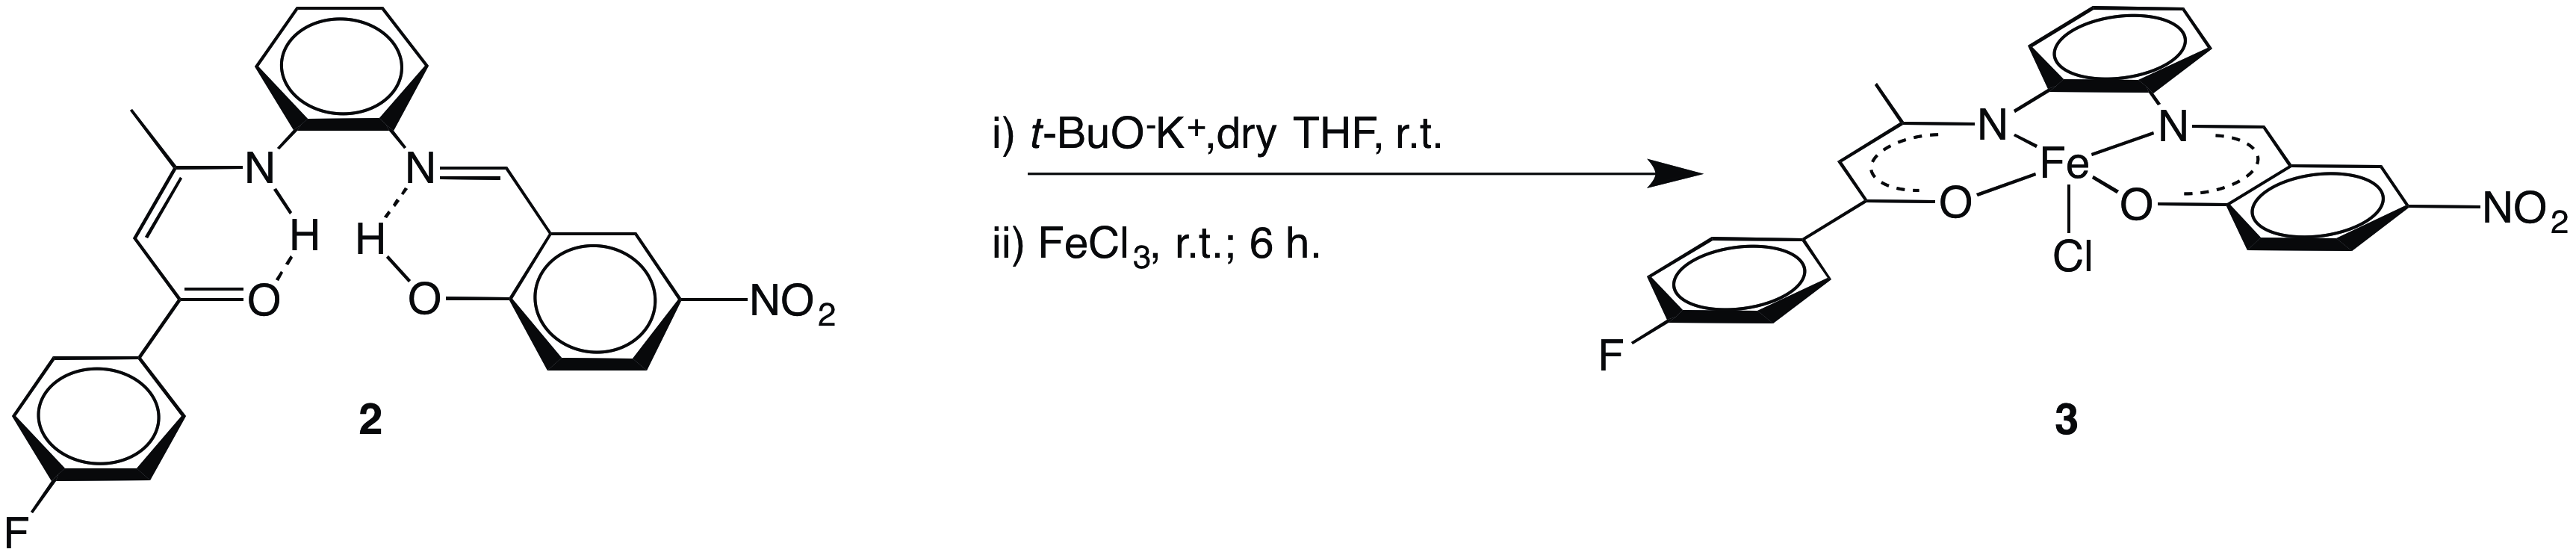

Supplement: s1 [file s1 › Figures-Schemes/scheme 2.tif]

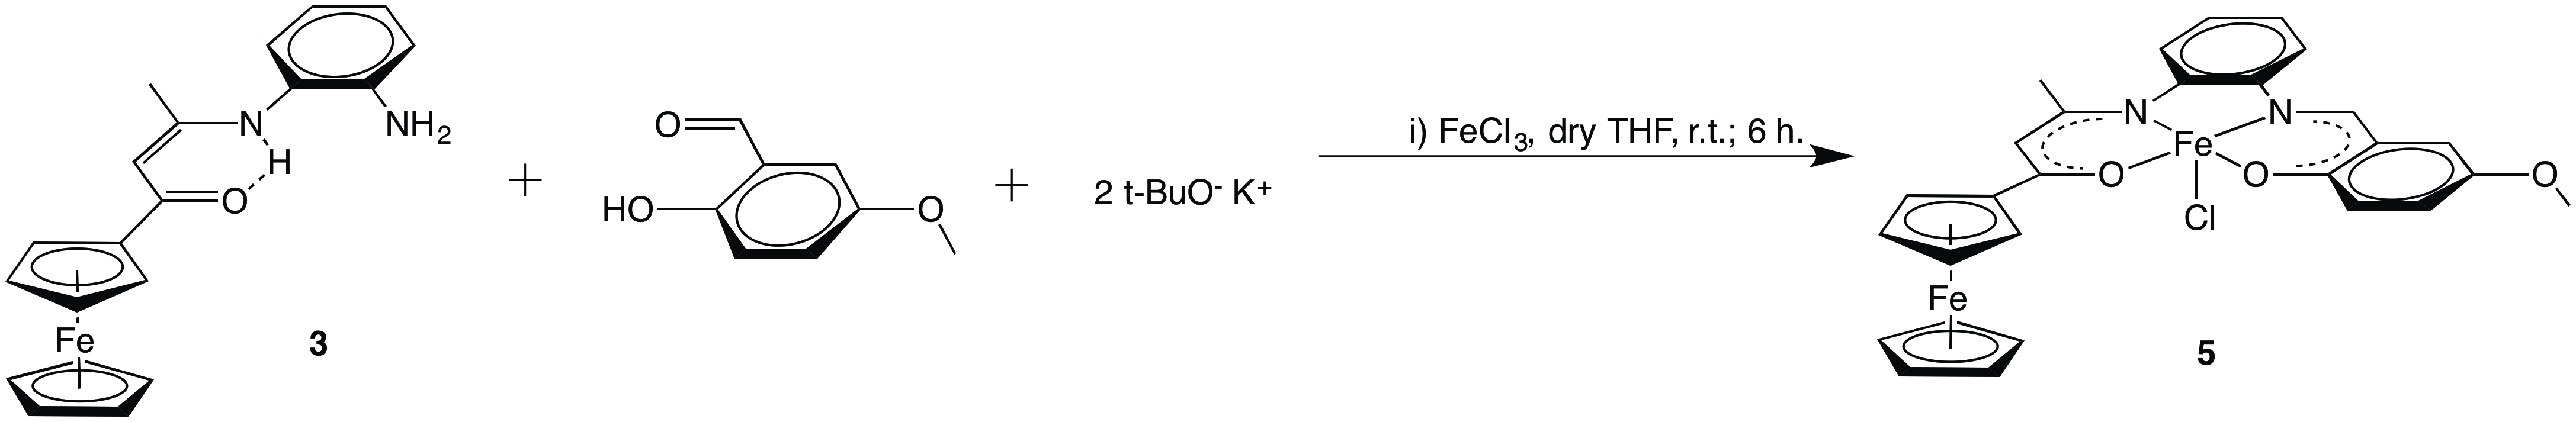

Supplement: s1 [file s1 › Figures-Schemes/Scheme 3.tif]
